# Supplementary material for: Genome Wild Analysis and Molecular Understanding of the Aquaporin Diversity in Olive Trees (Olea Europaea L.)
Source: MDPI journal article supplement (doi:10.3390/ijms21114183), 2020-06-11
Supplement: s1 [file s1]

**Figure S7.** Comparison of protein structural features, evolution pressure, and exon-intron structures of full-length *Oeu*AQP and *Oleur*AQP genes from the wild *Olea europaea* var. *sylvestris* and the cultivated *Olea europaea* cv. Picual, respectively.

| OeuAQPs<br>OleurAQPs                                                                      | Oeu- & OleurAQP<br>ar/R / Froger's / NPA1-2<br>Motifs*                                        | Oeu- & OleurAQP<br>SDP motifs** | Oeu/Oleur AQP<br>Protein similarity<br>(Ka/Ks)                                              | OleurAQP<br>similarities<br>CDS - Protein***                                 | Ka/Ks<br>OleurAQP<br>duplicates***       | Oeu- & OleurAQP Exon Intron genomic structures (Exon, red boxes; Intron, black line; Gene orientations indicated (3') in the x-axis) |
|-------------------------------------------------------------------------------------------|-----------------------------------------------------------------------------------------------|---------------------------------|---------------------------------------------------------------------------------------------|------------------------------------------------------------------------------|------------------------------------------|--------------------------------------------------------------------------------------------------------------------------------------|
|                                                                                           |                                                                                               |                                 |                                                                                             |                                                                              |                                          | 0kb1kb2kb3kb3'                                                                                                                       |
| Plasma membrane intrinsic proteins (PIPs)                                                 |                                                                                               |                                 |                                                                                             |                                                                              |                                          |                                                                                                                                      |
| OeuPIP1;1a/b/c<br>OleurPIP1;1                                                             | F-H-T-R / G-S-A-F-W / NPA-NPA                                                                 | Bo CO2 H2O2 Ur                  | 100% (0,0010)                                                                               | -                                                                            | -                                        |                                                                                                                                      |
| OeuPIP1;2<br>OleurPIP1;2a<br>OleurPIP1;2b                                                 | F-H-T-R / G-S-A-F-W / NPA-NPA                                                                 | Bo CO2: H2O2 Ur                 | 100% (0,0010)<br>100% (0,0010)                                                              | 99,42% - 100%                                                                | 0,001                                    |                                                                                                                                      |
| OeuPIP1;3<br>OleurPIP1;3a<br>OleurPIP1;3b                                                 | F-H-T-R / M-S-A-F-W / NPA-NPA<br>M-S-A-F                                                      | Bo CO2: H2O2 Ur                 | 96,52% (0,5323)<br>97,329% (0,3028)                                                         | 94,76% - 93,49%                                                              | 0,4137                                   |                                                                                                                                      |
| OeuPIP1;4<br>OleurPIP1;4a<br>OleurPIP1;4b                                                 | F-H-T-R / G-S-A-F-W / NPA-NPA                                                                 | Bo CO2: H2O2 Ur                 | 99,65% (0,0961)<br>99,3% (0,1237)                                                           | 98,65% - 99,65%                                                              | 0,0534                                   |                                                                                                                                      |
| OeuPIP1;5<br>OleurPIP1;5a<br>OleurPIP1;5b                                                 | F-H-T-R / G-S-A-F-W / NPA-NPA                                                                 | Bo CO2: H2O2 Ur                 | 100% (0,3641)<br>94,8% (0,1383)                                                             | 93,70% - 94,80%                                                              | 0,1784                                   |                                                                                                                                      |
| OeuPIP1;6a<br>OleurPIP1;6a<br>OleurPIP1;6b                                                | F-H-T-R / G-S-A-F-W / NPA-NPA                                                                 | Bo CO2: H2O2 Ur                 | 100% (0,6987)<br>99,65% (0,6987)                                                            | 99,53% - 99,65%                                                              | 0,091                                    |                                                                                                                                      |
| OeuPIP2;1<br>OleurPIP2;1a<br>OleurPIP2;1b                                                 | F-H-T-R / Q-S-A-F-W / NPA-NPA                                                                 | H2O2 Ur                         | 99,65% (0,3717)<br>99,65% (0,3717)                                                          | 99,31% - 100%                                                                | 0,001                                    |                                                                                                                                      |
| OeuPIP2;2<br>OleurPIP2;2a<br>OleurPIP2;2b                                                 | F-H-T-R / Q-S-A-F-W / NPA-NPA<br>Ur<br>Ur                                                     | Ur                              | 99,64% (0,0010)<br>99,64% (0,0010)                                                          | 99,98% - 100%                                                                | 0,001                                    |                                                                                                                                      |
| OeuPIP2;3<br>OleurPIP2;3a<br>OleurPIP2;3b                                                 | F-H-T-R / Q-S-A-F-W / NPA-NPA                                                                 | H2O2 Ur                         | 100% (0,1361)<br>98,96% (0,1780)                                                            | 98,65% - 99,96%                                                              | 0,178                                    |                                                                                                                                      |
| OeuPIP2;4<br>OleurPIP2;4                                                                  | F-H-T-R / Q-S-A-F-W / NPA-NPA                                                                 | H2O2 Ur                         | 99,26% (0,5108)                                                                             | -                                                                            | -                                        |                                                                                                                                      |
| OeuPIP2;5<br>OleurPIP2;5                                                                  | F-H-T-R / Q-S-A-F-W / NPA-NPA                                                                 | H2O2 Ur                         | 100% (0,0010)                                                                               | -                                                                            | -                                        |                                                                                                                                      |
| OeuPIP2;6<br>OleurPIP2;6a<br>OleurPIP2;6b                                                 | F-H-T-R / Q-S-A-F-W / NPA-NPA<br>-H-T-R / Q-S-A-F-W / NPA-NPA<br>-H-T-R / Q-S-A-F-W / NPA-NPA | H2O2 Ur                         | 99,31% (0,1710)<br>99,65% (0,1468)                                                          | 99,19% - 99,65%                                                              | 0,0666                                   |                                                                                                                                      |
| OeuPIP2;7<br>OleurPIP2;7                                                                  | F-H-T-R / Q-S-A-F-W / NPA-NPA                                                                 | H2O2 Ur                         | 99,65% (0,1799)                                                                             | -                                                                            | -                                        |                                                                                                                                      |
| OeuPIP2;8<br>OleurPIP2;8a<br>OleurPIP2;8b                                                 | F-H-T-R / M-S-A-F-W / NPA-NPA                                                                 | H2O2 Ur                         | 100% (0,0010)<br>99,29% (0,1073)                                                            | 99,30% - 99,29%                                                              | 0,1703                                   |                                                                                                                                      |
| OeuPIP2;9<br>OleurPIP2;9a<br>OleurPIP2;9b                                                 | F-H-T-R / M-S-A-F-W / NPA-NPA                                                                 | H2O2 Ur                         | 100% (0,0010)<br>99,65% (0,1388)                                                            | 99,53% - 99,65%                                                              | 0,1388                                   |                                                                                                                                      |
| OeuPIP2;10<br>OleurPIP2;10                                                                | F-H-T-R / Q-S-A-F-W / NPA-NPA                                                                 | H2O2 Ur                         | 98,85% (1,2672)                                                                             | -                                                                            | -                                        |                                                                                                                                      |
| OeuPIP2;11<br>OleurPIP2;11                                                                | F-H-T-R / Q-S-A-F-W / NPA-NPA                                                                 | H2O2 Ur                         | -                                                                                           | -                                                                            | -                                        |                                                                                                                                      |
| OeuPIP2;12<br>OleurPIP2;12                                                                | F-H-T-R / M-S-A-F-W / NPA-NPA                                                                 | H2O2 Ur                         | -                                                                                           | -                                                                            | -                                        |                                                                                                                                      |
| Tonoplast intrinsic proteins (TIPs)                                                       |                                                                                               |                                 |                                                                                             |                                                                              |                                          |                                                                                                                                      |
| OeuTIP1;1<br>OleurTIP1;1                                                                  | H-I-A-V / T-S-A-Y-W / NPA-NPA                                                                 | Ur                              | 100% (0,4860)                                                                               | -                                                                            | -                                        |                                                                                                                                      |
| OeuTIP1;2<br>OleurTIP1;2a<br>OleurTIP1;2b                                                 | H-I-A-V / T-S-A-Y-W / NPA-NPA                                                                 | Ur                              | 100% (0,0010)<br>99,6% (0,0520)                                                             | 98,42% - 99,60%                                                              | 0,0427                                   |                                                                                                                                      |
| OeuTIP1;3<br>OleurTIP1;3a<br>OleurTIP1;3b<br>OleurTIP1;3c<br>OleurTIP1;3d<br>OleurTIP1;3e | H-I-A-V / T-S-A-Y-W / NPA-NPA                                                                 | Ur                              | 99,22% (0,1299)<br>99,22% (0,1147)<br>98,84% (0,1656)<br>91,47% (0,1220)<br>92,25% (0,1142) | 99,87% - 99,22%*<br>99,74% - 99,61%*<br>88,93% - 92,28%*<br>89,48% - 93,02%* | 0,0010*<br>0,4009*<br>0,1083*<br>0,1004* |                                                                                                                                      |
| OeuTIP1;4<br>OleurTIP1;4                                                                  | H-I-A-V / T-S-A-F-W / NPA-NPA                                                                 | Ur                              | 99,21% (0,1000)                                                                             | -                                                                            | -                                        |                                                                                                                                      |
| OeuTIP1;5<br>OleurTIP1;5                                                                  | H-I-A-V / T-S-A-F-W / NPA-NPA                                                                 | Ur                              | 92,95% (1,2712)                                                                             | -                                                                            | -                                        |                                                                                                                                      |
| OeuTIP1;6<br>OleurTIP1;6                                                                  | H-I-A-V / T-S-A-Y-W / NPA-NPA                                                                 | Ur                              | 92,95% (1,2712)                                                                             | -                                                                            | -                                        |                                                                                                                                      |
| OeuTIP1;7<br>OleurTIP1;7                                                                  | H-I-G-R / T-S-A-Y-W / NPA-NPA                                                                 | H2O2 Ur                         | 97,61% (1,5809)                                                                             | -                                                                            | -                                        |                                                                                                                                      |
| OeuTIP2;1<br>OleurTIP2;1                                                                  | H-I-G-R / T-S-A-Y-W / NPA-NPA                                                                 | H2O2 Ur                         | 100% (0,3550)                                                                               | -                                                                            | -                                        |                                                                                                                                      |
| OeuTIP2;2<br>OleurTIP2;2                                                                  | H-I-G-R / T-S-A-Y-W / NPA-NPA                                                                 | H2O2 Ur                         | -                                                                                           | -                                                                            | -                                        |                                                                                                                                      |
| OeuTIP2;3<br>OleurTIP2;3a<br>OleurTIP2;3b                                                 | H-I-G-R / T-S-A-Y-W / NPA-NPA                                                                 | Ur                              | 100% (0,0010)<br>100% (0,0010)                                                              | 99,97% - 100%                                                                | 0,001                                    |                                                                                                                                      |
| OeuTIP2;4<br>OleurTIP2;4                                                                  | H-I-G-R / T-S-A-Y-W / NPA-NPA                                                                 | Ur                              | 99,2% (0,1298)                                                                              | -                                                                            | -                                        |                                                                                                                                      |
| OeuTIP2;5<br>OleurTIP2;5a<br>OleurTIP2;5b                                                 | H-I-G-R / T-S-A-Y-W / NPA-NPA                                                                 | Ur                              | 100% (0,0010)<br>99,59% (0,1018)                                                            | 99,05% - 99,59%                                                              | 0,0538                                   |                                                                                                                                      |
| OeuTIP3;1<br>OleurTIP3;1a<br>OleurTIP3;1b<br>OleurTIP3;1c                                 | H-V-A-R / T-A-A-Y-W / NPA-NPA                                                                 | Ur                              | 100% (0,0010)<br>98,84% (0,1019)<br>98,84% (0,1433)                                         | 97,81% - 98,84%*<br>86,77% - 89,84%*                                         | 0,1019*<br>0,1433*                       |                                                                                                                                      |
| OeuTIP4;1<br>OleurTIP4;1                                                                  | H-V-A-R / T-S-A-Y-W / NPA-NPA                                                                 | Ur                              | 100% (0,0010)                                                                               | -                                                                            | -                                        |                                                                                                                                      |
| OeuTIP5;1<br>OleurTIP5;1                                                                  | N-V-G-Y / T-S-A-Y-W / NPA-NPA                                                                 | Ur                              | 99,68% (0,3778)                                                                             | -                                                                            | -                                        |                                                                                                                                      |
| OeuTIP5;2<br>OleurTIP5;2                                                                  | N-V-G-Y / T-S-A-Y-W / NPA-NPA<br>-S-A-Y-W / NPA-NPA<br>-S-A-Y-W / NPS                         | Ur                              | 96,76% (0,3255)                                                                             | -                                                                            | -                                        |                                                                                                                                      |
| OeuTIP5;3<br>OleurTIP5;3a<br>OleurTIP5;3b                                                 | N-V-G-Y / T-A-A-Y-W / NPA-NPA                                                                 | H2O2 Ur                         | 100% (0,4970)<br>99,6% (0,1041)                                                             | 99,34% - 99,60%                                                              | 0,1041                                   |                                                                                                                                      |
| Uncharacterized X intrinsic proteins (XIPs)                                               |                                                                                               |                                 |                                                                                             |                                                                              |                                          |                                                                                                                                      |
| OeuXIP1;1<br>OleurXIP1;1a<br>OleurXIP1;1b                                                 | I-L-A-R / V-C-A-F-W / NPV-NPA                                                                 | H2O2                            | 100% (0,0010)<br>99,41% (0,1263)                                                            | 99,61% - 99,41%                                                              | 0,2411                                   |                                                                                                                                      |
| OeuXIP1;2<br>OleurXIP1;2a<br>OleurXIP1;2b                                                 | A-L-A-R / V-C-P-F-W / NPV-NPA                                                                 | H2O2 Ur                         | 100% (0,1199)<br>99,79% (0,1973)                                                            | 99,73% - 99,79%                                                              | 0,325                                    |                                                                                                                                      |
| OeuXIP1;3<br>OleurXIP1;3                                                                  | A-L-A-R / V-C-A-F-W / NPV-NPA                                                                 | H2O2 Ur                         | 94,01% (1,1671)                                                                             | -                                                                            | -                                        |                                                                                                                                      |
| Nodulin-26 like intrinsic proteins (NIPs)                                                 |                                                                                               |                                 |                                                                                             |                                                                              |                                          |                                                                                                                                      |
| OeuNIP1;1<br>OleurNIP1;1                                                                  | W-V-A-R / F-S-A-Y-I / NPA-NPA                                                                 | H2O2 Ur                         | 99,61% (0,2954)                                                                             | -                                                                            | -                                        |                                                                                                                                      |
| OeuNIP1;2<br>OleurNIP1;2                                                                  | C-I-A-R / F-S-A-Y-I / NPA-NPA                                                                 | Ur                              | 100% (0,7996)                                                                               | -                                                                            | -                                        |                                                                                                                                      |
| OeuNIP1;3<br>OleurNIP1;3                                                                  | W-V-A-R / F-S-A-Y-I / NPA-NPV                                                                 | H2O2 Ur                         | 89,76% (0,8785)                                                                             | -                                                                            | -                                        |                                                                                                                                      |
| OeuNIP1;4<br>OleurNIP1;4                                                                  | W-V-A-R / F-S-A-Y-I / NPA-NPV                                                                 | H2O2 Ur                         | -                                                                                           | -                                                                            | -                                        |                                                                                                                                      |
| OeuNIP3;1<br>OleurNIP3;1                                                                  | W-I-A-R / F-S-A-Y-V / NPA-NPA                                                                 | Ur                              | 100% (0,0010)                                                                               | -                                                                            | -                                        |                                                                                                                                      |
| OeuNIP4;1<br>OleurNIP4;1a<br>OleurNIP4;1b                                                 | W-V-A-R / F-S-A-Y-I / NPA-NPA                                                                 | Ur                              | 99,63% (0,3973)<br>99,25% (0,1497)                                                          | 98,67% - 98,88%                                                              | 0,2184                                   |                                                                                                                                      |
| OeuNIP5;1<br>OleurNIP5;1a<br>OleurNIP5;1b                                                 | A-I-G-R / F-T-A-Y-L / NPS-NPV                                                                 | Bo Ur<br>Bo Ur<br>Bo            | 99,33% (0,4567)<br>99,33% (0,2268)                                                          | 99,77% - 100%                                                                | 0,001                                    |                                                                                                                                      |
| OeuNIP5;2<br>OleurNIP5;2                                                                  | A-I-G-R / F-T-A-Y-L / NPS-NPV<br>F                                                            | Bo Ur                           | 96,98% (0,3559)                                                                             | -                                                                            | -                                        |                                                                                                                                      |
| OeuNIP5;3<br>OleurNIP6;1<br>OleurNIP6;1                                                   | A-I-G-R / F-T-A-Y-L / NPS-NPV<br>T-I-A-R / F-T-A-Y-L / NPS-NPV<br>NPA                         | Bo Ur<br>Bo                     | -<br>90,67% (0,3093)                                                                        | -                                                                            | -                                        |                                                                                                                                      |
| OeuNIP7;1<br>OleurNIP7;1a<br>OleurNIP7;1b                                                 | A-V-G-R / Y-S-A-Y-L / NPA-NPA<br>I<br>I                                                       | Ur<br>-<br>-                    | 99,22% (0,2690)<br>99,43% (1,3207)                                                          | 99,52% - 92,11%                                                              | 1,156                                    |                                                                                                                                      |
| Small basic intrinsic proteins (SIPs)                                                     |                                                                                               |                                 |                                                                                             |                                                                              |                                          |                                                                                                                                      |
| OeuSIP1;1<br>OleurSIP1;1a<br>OleurSIP1;1b<br>OleurSIP1;3                                  | V-T-P-N / F-A-A-Y-W / NPT-NPA<br>-A-A-Y-W                                                     | -                               | 100% (0,0010)<br>100% (0,0010)                                                              | 100% - 100%                                                                  | 0,001                                    |                                                                                                                                      |
| OeuSIP1;2<br>OleurSIP1;2                                                                  | V-T-P-N / F-A-A-Y-W / NPT-NPA                                                                 | -                               | 100% (0,3476)                                                                               | -                                                                            | -                                        |                                                                                                                                      |
| OeuSIP2;1<br>OleurSIP2;1<br>OleurSIP2;2                                                   | S-K-G-S / I-V-A-Y-W / NPL-NPA<br>-<br>-                                                       | -                               | 100% (0,2534)                                                                               | -                                                                            | -                                        |                                                                                                                                      |
|                                                                                           |                                                                                               |                                 |                                                                                             |                                                                              |                                          |                                                                                                                                      |

\* Residue differences are in red  
 \*\* Bo, Boric acid; Ur, Urea  
 \*\*\* Similarities calculated with OleurAQPs paralogue
