# Supplementary material for: Genome Wild Analysis and Molecular Understanding of the Aquaporin Diversity in Olive Trees (Olea Europaea L.)
Source: MDPI journal article supplement (doi:10.3390/ijms21114183), 2020-06-11

**Figure S6.** Structuration of the 15 motifs identified in the 52 full-length *OeuAQP* protein sequences (**Figure 2**). Motif analysis was performed by the MEME web server. Details in amino acid constituting these motifs are listed in the legend, and residue occurrences are provided on page 2 of the file.

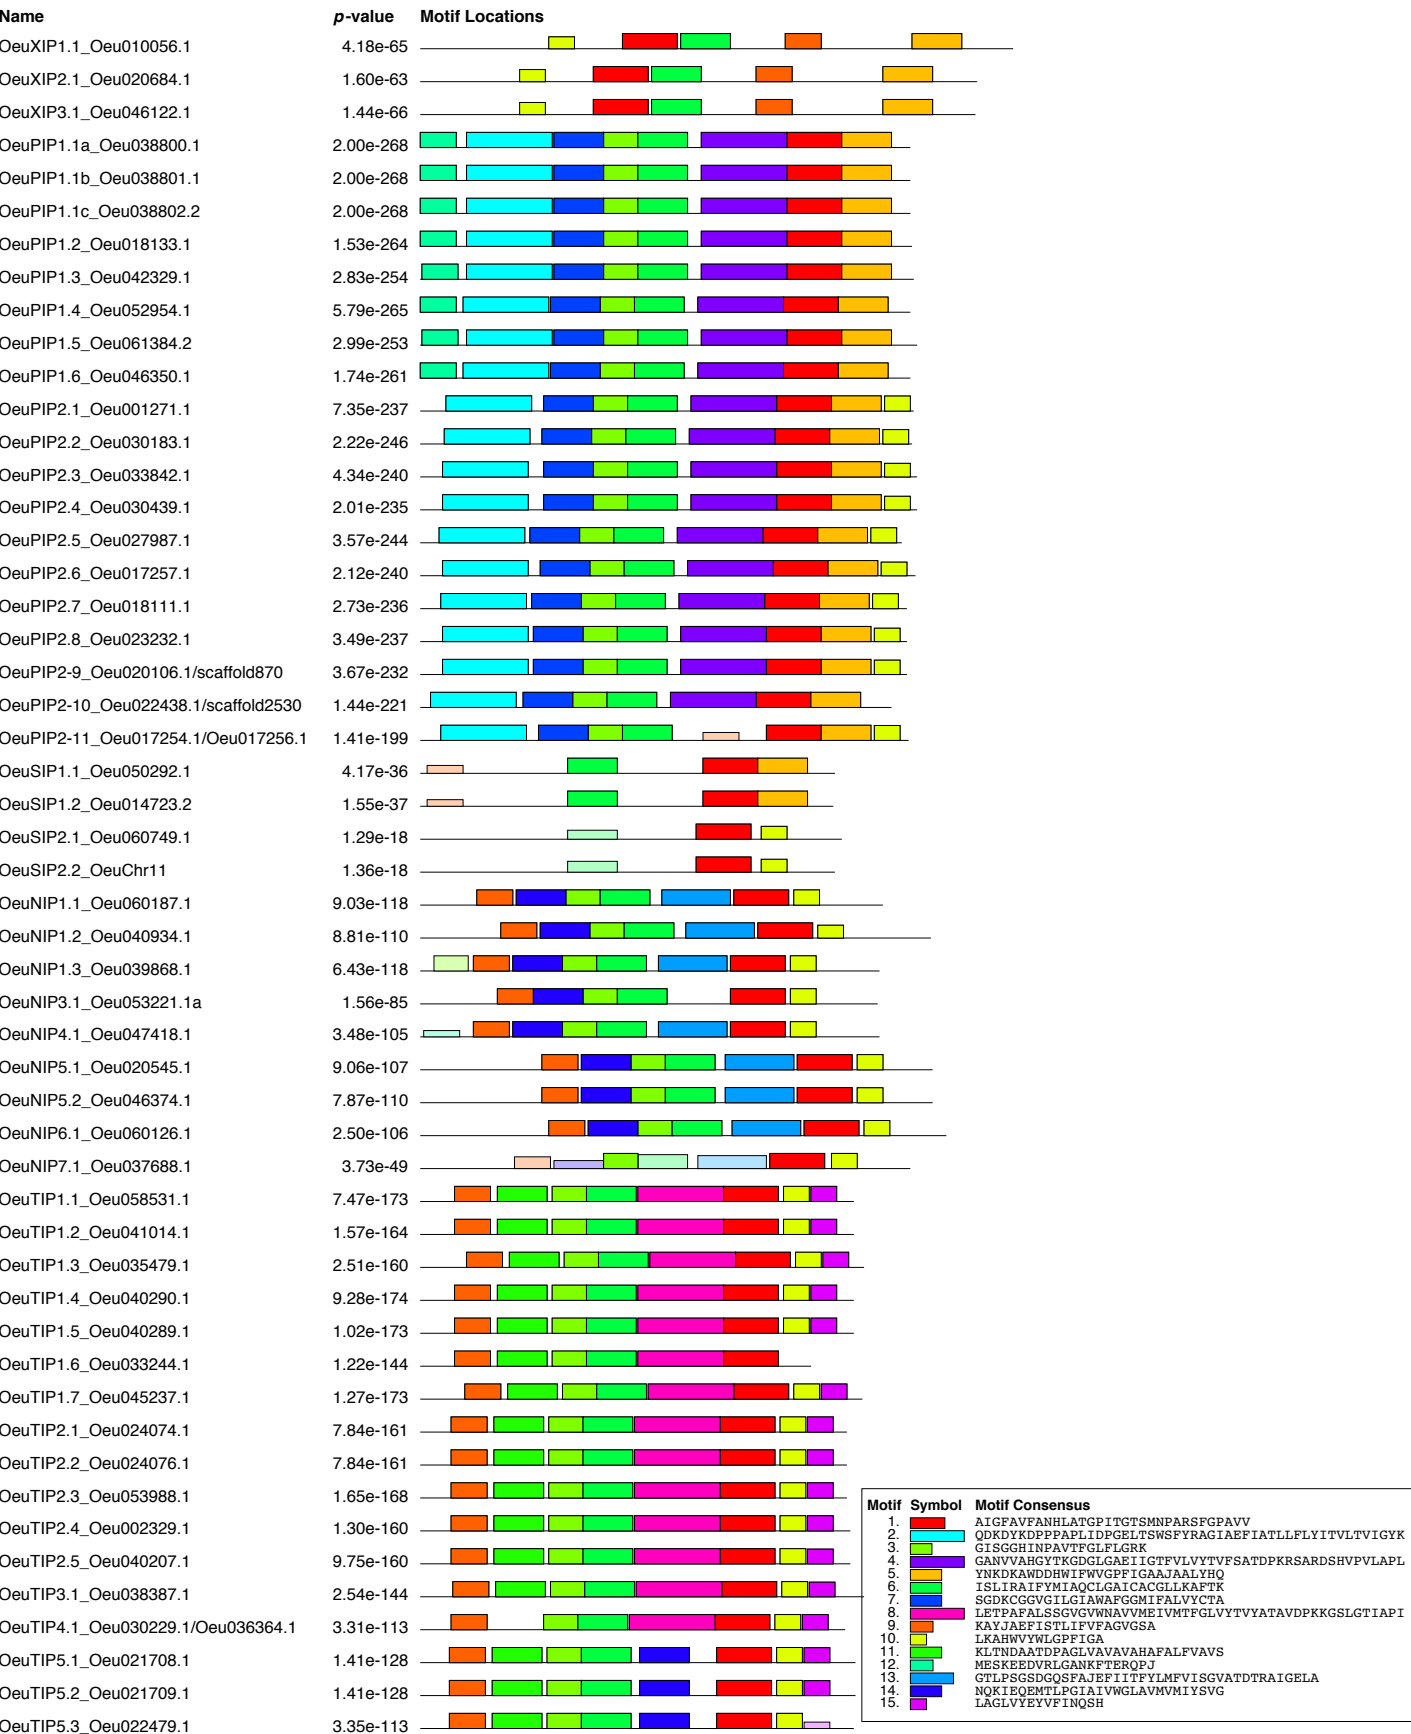

**Figure S6, suite.** Amino acids constituting the fifteen motifs of the 50 full-length *Oeu*AQP protein sequences (Figure 2). Motif analysis was performed by the MEME web server.

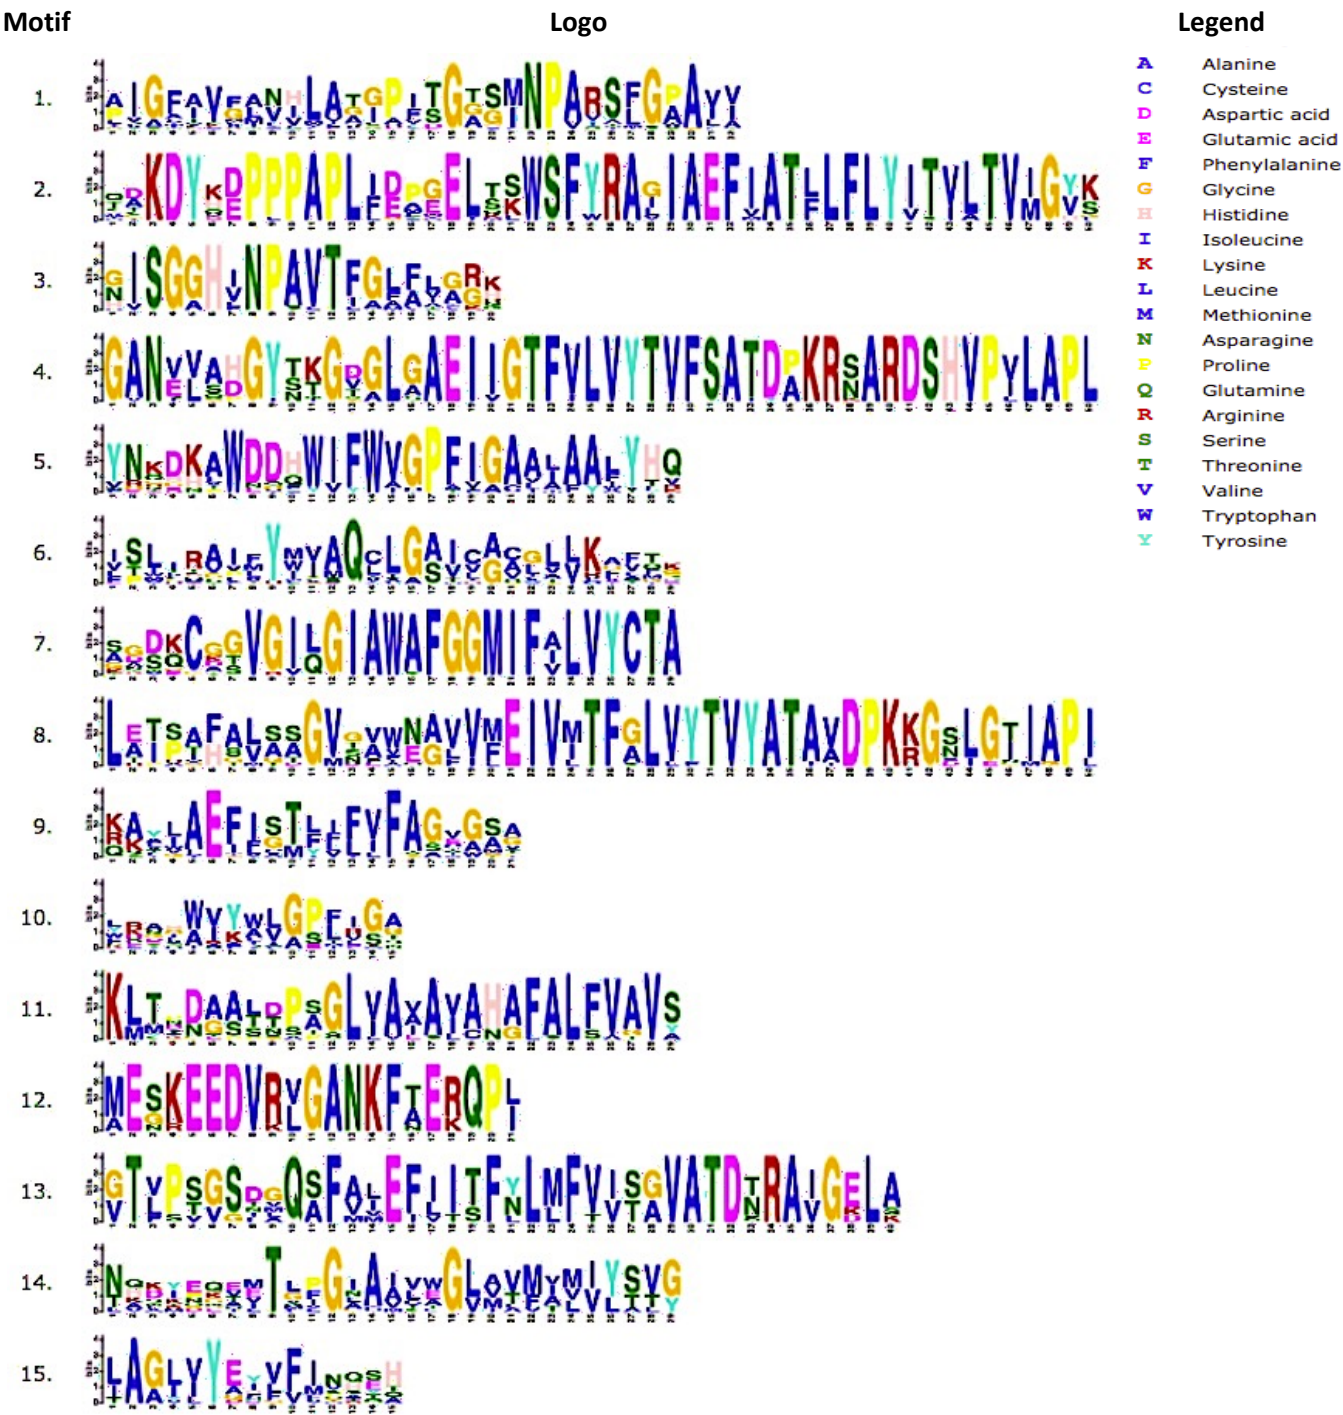

Supplement: s1 [file s1]
