# Supplementary material for: Genome Wild Analysis and Molecular Understanding of the Aquaporin Diversity in Olive Trees (Olea Europaea L.)
Source: MDPI journal article supplement (doi:10.3390/ijms21114183), 2020-06-11
Supplement: s1 [file s1]

**Figure S1** Detailed *OeuMIP* sequences (genomic, CDS and protein sequences) from the wild olive species *Olea europaea* var. *sylvestris*.

All sequences are presented in their original version, and if need be, in their corrected versions. Corrections are explained in the “**Observation**” item). Only the “corrected” sequences were used for analysis.

For the genomic sequences, the introns are in blue.

Codons “Stop” and “Start” are in red.

All sequences are classified according to their subfamily.

## PIP1 – Plasmalemmic Intrinsic Protein type 1

### *OeuPIP1;1a* *Oeu038800.1*

**Observation:** *OeuPIP1;1a*, 100% homolog to *OePIP1.1* DQ202708 previously cloned by Secchi et al., 2007, and to *PIP1.1* [A0A385A1M4 / A0A385A1N7] from UniProtKB

**Corrected as follow :** Exon 1 upstream extended with 63n

>*OeuPIP1;1a\_Oeu038800.1* | chr19:7203994..7205679 forward **Original version**

**ATG**GAGAGCAAAGAGGAGGATGTACGAGTGGGAGCCAACAAATTCGCCGAGAGGCAGCCGATTGGCACGGCTGCT  
CAAAGCCAGGACAAGGACTACAAGGAACCACCACCGCGCCACTTTTCGAGCCGGGTGAGCTGTCTCGTGGTCTG  
TTCTACAGAGCTGGCATAGCAGAGTTCATAGCCACTTTCTTGTTCTTTATATTACAGTTTGACAGTGATGGGA  
GTTAGTAAGTCTGATTCCAAGTGCAAACTGTTGGAATCCAAG**G**TATTGCTTGGGCATTTGGTGGCATGATCTTT  
GCCCTTGTTTACTGCACTGCAGGAATTTTCAGGCAAGTTCTTTTCTATATATATAATTTGCAAATTTTGCTTGAT  
TTGCTATGATCTTCAACAGTAACGATCCGTCTTAAAGCTCAAAGAGGGAGTCGTCAGATTTGAAGATTGGTTTGT  
GGGGTAGATATGAAAATACTAACCAACATATATATTGGATTATGGTCTCTGTCTCTGCAGTTTAGTCTTTGATAG  
TATATGGAATTTAGGTTTTGCCATTAAAATTAGAAATTACCTAATTCAAATTTGAGTTGATTTTTCATGAATTC  
AGTTATAAGGTTTTAATTCATTTGATATTAACATGGCAATTCAGTAAACCAAATCGTTTCAGCAATCAAATTTA  
TGATAACAATTTTAACAGTACTACTAACCATTATTTCTCAAAGAAAAGGGCAAATTTTAATGAACCTGCTTGT  
TTGCAGGGGGGCATATAAATCCGGCAGTGACTTTTCGGGCTGTTTTTGGGGAGGAAATTGTCGTTGACCCGGGCTG  
TGTTCTACATGGTGATGCAGTGTCTTGGAGCCATATGTGGTGCTGGTGTGGTTAAGGGATTTCGGAAGACCCCTGT  
ACATGACCAAGGGTGGTGGTGCTAATGTAGTAGCCCACGGTTACACCAAGGGCGATGGCCTAGGTGCTGAAATAA  
TCGGAACTTTTGTGCTCGTTTACACTGTCTTCTCTGCTACTGATGCCAAACGTAGCGCCAGAGACTCGCACGTTC  
CTGTAAGCACTCCTCTTGTCTTTGTAGATTGAGATTGAACAAGAATTTGCTTGTGTATCTGTAATCAAATGTCT  
TTTCGTTTTGTGAAGACTGATGAATCAAAAAATGTCATTGTTGATCAAGAAAAGTTTGATTAATTGGATTCTCA  
TATGCTGTAATTCATGGTTTTTCAGATATTGGCCCCCTTGCCATTGGGTTTGCTGTGTTCTTGGTGCACCTGGC  
AACCATCCCTATTACCGGTACAGGTATTAACCCCGCCAGGAGTCTTGGTGCAGCAATCATCTACAACAAAGACAA  
GGCATGGGATGATCACGTAAGCTAAAAATTCAACTGCCTGAATTCACAATTTGAAATATTTGAGTTAAGGGGGGC  
ATACCTAGACAATTATATCCTAACAAATTTTACGTTGTTCACTTATCACAATCCTCCTTTTATCTATTTGGGA  
CTACGACGAAATTTTTTAATAATCTGGCAGATGAGATGATAAGATTGTCTAAAGTTTGTTCTCACTCTTATCTTG  
CTTGATATGATAATATGCAGTGGATATTCTGGGTTGACCGTTTCATTGGGGCAGCACTTGCAGCTCTATACCAT  
GTGGTGGTGATCCGAGCCATCCCATTCAAAAA**TAA**

>*OeuPIP1;1a\_Oeu038800.1* **Corrected version**

**ATG**GAGAGCAAAGAGGAGGATGTACGAGTGGGAGCCAACAAATTCGCCGAGAGGCAGCCGATTGGCACGGCTGCT  
CAAAGCCAGGACAAGGACTACAAGGAACCACCACCGCGCCACTTTTCGAGCCGGGTGAGCTGTCTCGTGGTCTG  
TTCTACAGAGCTGGCATAGCAGAGTTCATAGCCACTTTCTTGTTCTTTATATTACAGTTTGACAGTGATGGGA  
GTTAGTAAGTCTGATTCCAAGTGCAAACTGTTGGAATCCAAGGTATTGCTTGGGCATTTGGTGGCATGATCTTT  
GCCCTTGTTTACTGCACTGCAGGAATTTTCAGGCAAGTTCTTTTCTATATATATAATTTGCAAATTTTGCTTGAT  
TTGCTATGATCTTCAACAGTAACGATCCGTCTTAAAGCTCAAAGAGGGAGTCGTCAGATTTGAAGATTGGTTTGT  
GGGGTAGATATGAAAATACTAACCAACATATATATTGGATTATGGTCTCTGTCTCTGCAGTTTAGTCTTTGATAG  
TATATGGAATTTAGGTTTTGCCATTAAAATTAGAAATTACCTAATTCAAATTTGAGTTGATTTTTCATGAATTC  
AGTTATAAGGTTTTAATTCATTTGATATTAACATGGCAATTCAGTAAACCAAATCGTTTCAGCAATCAAATTTA  
TGATAACAATTTTAACAGTACTACTAACCATTATTTCTCAAAGAAAAGGGCAAATTTTAATGAACCTGCTTGT  
TTGCAGGGGGGCATATAAATCCGGCAGTGACTTTTCGGGCTGTTTTTGGGGAGGAAATTGTCGTTGACCCGGGCTG  
TGTTCTACATGGTGATGCAGTGTCTTGGAGCCATATGTGGTGCTGGTGTGGTTAAGGGATTTCGGAAGACCCCTGT  
ACATGACCAAGGGTGGTGGTGCTAATGTAGTAGCCCACGGTTACACCAAGGGCGATGGCCTAGGTGCTGAAATAA

TCGGAACTTTTGTGCTCGTTTACACTGTCTTCTCTGCTACTGATGCCAAACGTAGCGCCAGAGACTCGCACGTTCT  
CTGTAAGCACTCCTCTTGTCTTTGTAGATTGAGATTGAACAAGAATTTGCTTGTGTATCTGTAATCAAATTTGTCT  
TTTCGTTTTGTAAGAACTGATGAATCAAAAAATGTCATTGTTGATCAAGAAAAAGTTTGATTAATTTGGATTCTCA  
TATGCTGTAATTTCAATGGTTTTTCAGATATTGGCCCCCTTGCCATTGGGTTTGTCTGTGTTCTTGGTGCACCTTGGC  
AACCATCCCTATTACCGGTACAGGTATTAACCCCGCCAGGAGTCTTGGTGCAGCAATCATCTACAACAAAGACAA  
GGCATGGGATGATCACGTAAGCTAAAAATTTCAACTGCCTGAATTTCAACAATTGAAATATTTGAGTTAAGGGGGGC  
ATACCTAGACAATTATATCCTAACAAATTTTTACGTTGTTCACTTATCACAATCCTCCTTTTATCTATTTTGGGA  
CTACGACGAAATTTTTTAATAATCTGGCAGATGAGATGATAAGATTGTCTAAAGTTTGTCTCACTCTTATCTTG  
CTCTGATATGATAATATGCAGTGGATATTCTGGGTTGGACCGTTTCAATTGGGGCAGCACTTGCAGCTCTATACCAT  
GTGGTGGTGTATCCGAGCCATCCCATTCAAAAAATAA

>OeuPIP1;1a\_Oeu038800.1

ATGGAGAGCAAAGAGGAGGATGTACGAGTGGGAGCCAACAAATTCGCCGAGAGGCAGCCGATTGGCACGGCTGCT  
CAAAGCCAGGACAAGGACTACAAGGAACCACCACCGGCCCACTTTTCGAGCCGGGTGAGCTGTCTCGTGGTCTG  
TTCTACAGAGCTGGCATAGCAGAGTTCATAGCCACTTTCTTGTTCCTTTATATTACAGTTTTGACAGTGATGGGA  
GTTAGTAAGTCTGATTCCAAGTGCAAAACTGTTGGAATCCAAGGTATTGCTTGGGCATTTGGTGGCATGATCTTT  
GCCCTTGTTTTACTGCACTGCAGGAATTTTCAGGGGGGCATATAAATCCGGCAGTGACTTTTCGGGCTGTTTTTGGG  
AGGAAATTGTCGTTGACCCGGGCTGTGTTCTACATGGTGTATGCAGTGTCTTGGAGCCATATGTGGTGTCTGGTGTG  
GTTAAGGGATTCCGAAAGACCCCTGTACATGACCAAGGGTGGTGGTGTCTAATGTAGTAGCCACGGTTACACCAAG  
GGCGATGGCCTAGGTGCTGAAATAATCGGAACCTTTTGTGCTCGTTTACACTGTCTTCTCTGCTACTGATGCCAA  
CGTAGCGCCAGAGACTCGCACGTTTCTATATTGGCCCCCTTGCCATTGGGTTTGGCTGTGTTCTTGGTGCACCTTG  
GCAACCATCCCTATTACCGGTACAGGTATTAACCCCGCCAGGAGTCTTGGTGCAGCAATCATCTACAACAAAGAC  
AAGGCATGGGATGATCACTGGATATTCTGGGTTGGACCGTTTCAATTGGGGCAGCACTTGCAGCTCTATACCATGTG  
GTGGTGTATCCGAGCCATCCCATTCAAAAAATAA

>OeuPIP1;1a\_Oeu038800.1

MESKEEDVRVGANKFAERQPIGTAAQSQDKDYKEPPAPLFEPEGELSSWSFYRAGIAEFIAFLFLYITVLTVMG  
VSKSDSKCKTVGIQGIAWAFGGMIFALVYCTAGISGGHINPAVTFGLFLGRKLSLTRAUVFYMVMQCLGAICGAGV  
VKGF GKTL YMTKGGGANVVAHGYTKGDGLGAEIIGTFVLVYTVFSATDAKRSARDSHVPILAPLP IGFVFLVHL  
ATIPITGTGINPARSLGAAIIYNKDKAWDDHWIFWVGPFIGAALAALYHVVVIRAIPFKK\*

## OeuPIP1;1b Oeu038801.1

**Observation:** Protein 100% Homolog to Oeu038800.1

**Corrected as follow :** Exon 1 upstream extended with 63n

>OeuPIP1;1b\_Oeu038801.1 | chr19:7208573..7210258 reverse Original version

ATGGAGAGCAAAGAGGAGGATGTACGAGTGGGAGCCAACAAATTCGCCGAGAGGCAGCCGATTGGCACGGCTGCT  
CAAAGCCAGGACAAGGACTACAAGGAACCACCACCGGCCCACTTTTCGAGCCGGGTGAGCTGTCTCGTGGTCTG  
TTCTACAGAGCTGGCATAGCAGAGTTCATAGCCACTTTCTTGTTCCTTTATATTACAGTTTTGACAGTGATGGGA  
GTTAGTAAGTCTGATTCCAAGTGCAAAACTGTTGGAATCCAAGTATTGCTTGGGCATTTGGTGGCATGATCTTT  
GCCCTTGTTTTACTGCACTGCAGGAATTTTCAGGCAAGTTCTTTTCTATATATATAATTTGCAAATTTTGCTTGTAT  
TTGCTATGATCTTCAACAGTAACGATCCGTCTTAAAGCTCAAAGAGGGAGTCGTCAGATTTGAAGATTGGTTTTGT  
GGGGTAGATATGAAAATACTAACCAACATATATATTGGATTATGGTCTCTGTCTCTGCAGTTTAGTCTTTGATAG  
TATATGGAATTTAGGTTTTGCCATTAAAATTAGAAATTACCTAATTCAAAATTGAGTTGATTTTTCATGAATTC  
AGTTATAAGGTTTTAATTCATTTGATATTAACATGGCAATTCAGTAAACCAAATCGTTTCAGCAATCAAATTTA  
TGATGAACAATTTTAACAGTACTACTAACCTATTTTCTTCAAAGAAAAGGGCAAATTTTAATGAACCTGCTTGT  
TTGCAGGGGGGCATATAAATCCGGCAGTGACTTTTCGGGCTGTTTTTGGGGAGGAAATTGTCGTTGACCCGGGCTG  
TGTTCTACATGGTGTATGCAGTGTCTTGGAGCCATATGTGGTGTCTGGTGTGGTTAAGGGATTCCGAAAGACCCGT  
ACATGACCAAGGGTGGTGGTGTCTAATGTAGTAGCCACGGTTACACCAAGGGCGATGGCCTAGGTGCTGAAATAA  
TCGGAACTTTTGTGCTCGTTTACACTGTCTTCTCTGCTACTGATGCCAAACGTAGCGCCAGAGACTCGCACGTTCT  
CTGTAAGCACTCCTCTTGTCTTTGTAGATTGAGATTGAACAAGAATTTGCTTGTGTATCTGTAATCAAATTTGTCT  
TTTCGTTTTGTAAGAACTGATGAATCAAAAAATGTCATTGTTGATCAAGAAAAAGTTTGATTAATTTGGATTCTCA  
TATGCTGTAATTTCAATGGTTTTTCAGATATTGGCCCCCTTGCCATTGGGTTTGTCTGTGTTCTTGGTGCACCTTGGC  
AACCATCCCTATTACCGGTACAGGTATTAACCCCGCCAGGAGTCTTGGTGCAGCAATCATCTACAACAAAGACAA  
GGCATGGGATGATCACGTAAGCTAAAAATTTCAACTGCCTGAATTTCAACAATTGAAATATTTGAGTTAAGGGGGGC  
ATACCTAGACAATTATATCCTAACAAATTTTTACGTTGTTCACTTATCACAATCCTCCTTTTATCTATTTTGGGA  
CTACGACGAAATTTTTTAATAATCTGGCAGATGAGATGATAAGATTGTCTAAAGTTTGTCTCACTCTTATCTTG  
CTCTGATATGATAATATGCAGTGGATATTCTGGGTTGGACCGTTTCAATTGGGGCAGCACTTGCAGCTCTATACCAT  
GTGGTGGTGTATCCGAGCCATCCCATTCAAAAAATAA

>OeuPIP1;1b\_Oeu038801.1 **Corrected version**

**ATG**GAGAGCAAAGAGGAGGATGTACGAGTGGGAGCCAACAAATTCGCCGAGAGGCAGCCGATTGGCACGGCTGCT  
CAAAGCCAGGACAAGGACTACAAGGAACCACCACCGGCGCCACTTTTCGAGCCGGGTGAGCTGTCTCGTGGTTCG  
TTCTACAGAGCTGGCATAGCAGAGTTCATAGCCACTTTCTTGTTCCTTTATATTACAGTTTTGACAGTGATGGGA  
GTTAGTAAGTCTGATTCCAAGTGCAAAACTGTTGGAATCCAAGGTATTGCTTGGGCATTTGGTGGCATGATCTTT  
GCCCTTGTTTACTGCACTGCAGGAATTT**CAGGCAAGTTC**TTTTCTATATATATAATTTGCAAATTTTGCTTGTAT  
TTGCTATGATCTTCAACAGTAACGATCCGTCTTAAAGCTCAAAGAGGGAGTCGTCAGATTTGAAGATTGGTTTGT  
GGGGTAGATATGAAAATACTAACCAACATATATATTGGATTATGGTCTCTGTCTCTGCAGTTTAGTCTTTGATAG  
TATATGGAATTTAGGTTTTGCCATTAAAATTAGAAATTACCTAATTCAAATTTGAGTTGATTTTTTCATGAATTTTC  
AGTTATAAGGTTTTTAATTCATTTTGATATTAACATGGCAATTCAGTAAACCAAATCGTTTTAGCAATCAAATTTA  
TGATGAACAATTTTAACAGTACTACTAACCTATTTTCTTCAAAGAAAAGGGCAAATTTTAATGAAGTCTTGT  
TTG**CAG**GGGGGCATATAAATCCGGCAGTGACTTTTCGGGCTGTTTTTGGGGAGGAAATTGTCGTTGACCCGGGCTG  
TGTTCTACATGGTGATGCAGTGTCTTGGAGCCATATGTGGTGCTGGTGTGGTTAAGGGATTTCGAAAGACCCGTG  
ACATGACCAAGGGTGGTGGTGCTAATGTAGTAGCCACGGTTACACCAAGGGCGATGGCCTAGGTGCTGAAATAA  
TCGGAACTTTTGTGCTCGTTTACACTGTCTTCTCTGCTACTGATGCCAAACGTAGCGCCAGAGACTCGCACGTTTC  
CTGTAAGCACTCCTCTTGTCTTTGTAGATTGAGATTGAACAAGAATTTGCTTGTGTATCTGTAATCAAATTTGTCT  
TTTCGTTTTTGTAAAGAACTGATGAATCAAAAAATGTCATTGTTGATCAAGAAAAAGTTTGATTAATTTGGATTCTCA  
TATGCTGTAATTCATGGTTTT**CAG**ATATTGGCCCCCTTGCCATTGGGTTTGTCTGTGTTCTTGGTGCACCTTGGC  
AACCATCCCTATTACCGGTACAGGTATTAACCCCGCCAGGAGTCTTGGTGCAGCAATCATCTACAACAAAGACAA  
GGCATGGGATGATCAGCTAAGCTAAAAATTCAACTGCCTGAATTCACAATTTGAAATATTTGAGTTAAGGGGGGC  
ATACCTAGACAATTATATCCTAACAAATTTTACGTTGTTCACTTATCACAATCCTCCTTTTATCTATTTTGGGA  
CTACGACGAAATTTTTTAATAATCTGGCAGATGAGATGATAAGATTGTCTAAAGTTTGTCTCACTCTTATCTTG  
CTCTGATATGATAATATG**CAG**TGGATATTCTGGGTTGGACCGTTCATTGGGGCAGCACTTGCAGCTCTATACCAT  
GTGGTGGTGATCCGAGCCATCCCATTCAAAAA**TAA**

>OeuPIP1;1b\_Oeu038801.1

**ATG**GAGAGCAAAGAGGAGGATGTACGAGTGGGAGCCAACAAATTCGCCGAGAGGCAGCCGATTGGCACGGCTGCT  
CAAAGCCAGGACAAGGACTACAAGGAACCACCACCGGCGCCACTTTTCGAGCCGGGTGAGCTGTCTCGTGGTTCG  
TTCTACAGAGCTGGCATAGCAGAGTTCATAGCCACTTTCTTGTTCCTTTATATTACAGTTTTGACAGTGATGGGA  
GTTAGTAAGTCTGATTCCAAGTGCAAAACTGTTGGAATCCAAGGTATTGCTTGGGCATTTGGTGGCATGATCTTT  
GCCCTTGTTTACTGCACTGCAGGAATTT**CAG**GGGGGCATATAAATCCGGCAGTGACTTTCGGGCTGTTTTTGGGG  
AGGAAATTTGTCGTTGACCCGGGCTGTGTTCTACATGGGTGATGCAGTGTCTTGGAGCCATATGTGGTGCTGGTGTG  
GTTAAGGGATTTCGAAAGACCCCTGTACATGACCAAGGGTGGTGGTGTCTAATGTAGTAGCCCCACGGTTACACCAAG  
GGCGATGGCCTAGGTGCTGAAATAATCGGAACTTTTGTGCTCGTTTACACTGTCTTCTCTGCTACTGATGCCAAA  
CGTAGCGCCAGAGACTCGCACGTTCTATATTGGCCCCCTTGCCATTGGGTTTGTCTGTGTTCTTGGTGCACCTTG  
GCAACCATCCCTATTACCGGTACAGGTATTAACCCCGCCAGGAGTCTTGGTGCAGCAATCATCTACAACAAAGAC  
AAGGCATGGGATGATCACTGGATATTCTGGGTTGGACCGTTCATTGGGGCAGCACTTGCAGCTCTATACCATGTG  
GTGGTGATCCGAGCCATCCCATTCAAAAA**TAA**

>OeuPIP1;1b\_Oeu038801.1

MESKEEDVRVGANKFAERQPIGTAAQSQDKDYKEPPAPLFEPELGELSSWSFYRAGIAEFIAITFLFLYITVLTVMG  
VSKSDSKCKTVGIQGIAWAFGGMIFALVYCTAGISGGHINPAVTFGLFLGRKLSLTRAVFYMVMQCLGAICGAGV  
VKGFGKTLMYTKGGGANVVAHGTYTKDGLGAEIIGTFVLVYTVFSATDAKRSARDSHVPILAPLPIGFAVFLVHL  
ATIPITGTGINPARSLGAIIYNKDKAWDDHWIFVWGPFIGAALAALYHVVVIRAIPFKK\*

## OeuPIP1;1c Oeu038802.2

**Observation:** Protein 100% Homolog to Oeu038800.1

**Corrected as follow :** Exon 1 upstream extended with 63n

>OeuPIP1;1c\_Oeu038802.2 | chr19:7217774..7219459 forward **Original version**

**ATG**GAGAGCAAGGAGGAGGATGTACGAGTGGGAGCCAACAAATTCGCCGAGAGGCAGCCGATTGGCACGGCTGCT  
CAAAGCCAGGACAAGGACTACAAGGAACCACCACCGGCGCCACTTTTCGAGCCGGGTGAGCTGTCTCGTGGTTCG  
TTCTACAGAGCTGGCATAGCAGAGTTCATAGCCACTTTCTTGTTCCTTTATATTACAGTTTTGACAGTGATGGGA  
GTTAGTAAGTCTGATTCCAAGTGCAAAACTGTTGGAATCCAAGGTATTGCTTGGGCATTTGGTGGCATGATCTTT  
GCCCTTGTTTACTGCACTGCAGGAATTT**CAGGCAAGTTC**TTTTCTATATATATAATTTGCAAATTTTGCTTGTAT  
TTGCTATGATCTTCAACAGTAACGATCCGTCTTAAAGCTCAAAGAGGGAGTCGTCAGATTTGAAGATTGGTTTGT  
GGGGTAGATATGAAAATACTAACCAACATATATATTGGATTATGGTCTCTGTCTCTGCAGTTTAGTCTTTGATAG  
TATATTGGAATTTAGGTTTTGCCATTAAAATTAGAAATTACCTAATTCAAAATTTGAGTTGATTTTTTCATGAATTTTC  
AGTTATAAGGTTTTTAATTCATTTTGATATTAACATGGCAATTCAGAAAACCAAATCGTTTTAGCAATCAAATTTA  
TGATGAACAATTTTAACAGTACTACTAACCTATTTTCTTCAAAGAAAAGGGCAAATTTTAATGAAGTCTTGT  
TTG**CAG**GGGGGCATATAAATCCGGCAGTGACTTTTCGGGCTGTTTTTGGGGAGGAAATTGTCGTTGACCCGGGCTG  
TGTTCTACATGGTGATGCAGTGTCTTGGAGCCATATGTGGTGCTGGTGTGGTTAAGGGATTTCGAAAGACCCGTG  
ACATGACCAAGGGTGGTGGTGCTAATGTAGTAGCCACGGTTACACCAAGGGCGATGGCCTAGGTGCTGAAATAA

**>OeuPIP1;1c\_Oeu038802.2 Corrected version**

>OeuPIP1;1c\_Oeu038802.2

>OeuPIP1;1c Oeu038802.2

**OeuPIP1;2**    **Oeu018133.1**

```
>OeuPIP1;2 Oeu018133.1 | Scaffold17619:410..2065 forward
```

ATCGGAGAGCAAAAGAGGAAGATGTACAGTGGGAGCCAAACAAATTCACAGAGGGCAGCCGATTGGCACGGCGGGCG  
CAATCCCAAGACAAGGACTACAAGGAGCCACCACCGGCGCCGCTTTTCGAGCCCGGCGAGCTGTCTCATGGTCG  
TTCTACAGAGCTGGCATTGCCGAGTTCATAGCCACATTCCTGTTCTGTATATTACAATTTTTGACAGTGATGGGA  
GTTAGCAAGTCTGATTCTAAGTGCTCTACTGTTGGAATCCAAGGTATTGCTTGGGCATTCCGGTGGCATGATCTTT

GCCCTTGTTTACTGCACCGCTGGAATTTTCAGGCAAGTTCTTTACCTATAAATGGTTTCGCATATTTGGCTTCTATA  
TACCTTGATCTTTAACCTTAATATCTCATACGAGTAATCGATCTGTCTAAAACTCTAAAAATTGAGTTAGATTTCA  
GGATTGGCGTTTCTCAGTTGGGTTGCTCCGTCTTGATGATGAGGTTGAAGTTTAAACATGGAATCGTCTGTGTCTCT  
GTAGTTAGTCTTTGATAGTAGCTTTGGGAATCAAAATAAGAAATTACCTAATTCAAAATTGAGTTGATTTTATAT  
TAATTTCTGTTCTGAATAACAATTATAACAATATTAACCTATTTTCTTCAAAGAAAATGGCATAATTATTACTGG  
AAAAGAAAGCAAGTTGTATGACCAGTAACCTATTGACGAGTTGTTTGTCTGTGCAGGGGGGCATATAAACCCGGCA  
GTGACATTTGGGCTGTTTTTGGCCAGGAAATTGTCAATTGACTCGGGCTATATTCTACATGGTGATGCAGTGCCTA  
GGAGCCATATGTGGTGCTGGTGTGGTTAAGGGGTTTCGGAAGACCCCTGTACATGTCCAAGGGTGTTGGTGCTAAT  
GTTGTAGCTCACGGTTACACCAAGGGTAGTGGCCTAGGTGCTGAAATTATAGGTACCTTCGTTCTCGTTTACACC  
GTTTTCTCTGCTACTGATGCCAAACGTAGCGCCAGAGACTCTCACGTTCCAATAAGCACTCCTCTTTTCTTTTTT  
GGCTAGTTTCTCTTGAAATTTTTTCATTTGTACAGGTTGTAGATATTGATCAATCAAAGCACAACATTATTGACTC  
AAAAAGTTTGATTAATTGGACTCCCTAATTCTGTAATTCTATGGTTTTTCAGATATTAGCCCCCTTGCCATTGG  
GTTTGCCGTGTTCTTGGTGCACCTTGGCGACCATCCCTATTACAGGTACTGGTATTAACCCCGCCAGGAGTCTTGG  
TGCAGCAATCATCTACAACAAAGACAAGGCATGGGATGATCACATAAGCTAAAAATTCAACTGTATCTGAATTCAG  
TATAATCAGGATTCTACTATTGAAATATTTCGAGTTAAGGACTCACTCAGACAATTATATCCTAACTTACACTACA  
AGTCGTGTTAAATTTGGCGTGTATAAGGTGAATGGTAAATGTGACATATTTTTACGTTGTTAACTTACCACAAC  
CCTCCTATTTTAGGATGATAAGGTTGGATAAAGTTAGTTATCTTTTTTCTGATAATGTGCAGTGGATATTCTGG  
GTTGGACCATTCAATTGGGGCAGCACTTGCAGCTCTCTACCATGTGGTTGTGATAAGAGCCATCCCATTCAGAAT  
AAGTGA

>OeuPIP1;2\_Oeu018133.1

ATGGAGAGCAAAGAGGAAGATGTACGAGTGGGAGCCAACAAATTC AACGAGAGGCAGCCGATTGGCACGGCGGCG  
CAATCCCAAGACAAGGACTACAAGGAGCCACCACCGGCGCCGCTTTTCGAGCCCCGGCGAGCTGTCTCATGGTCG  
TTCTACAGAGCTGGCATTGCCGAGTTCATAGCCACATTCCTGTTCTGTATATTACAATTTTGACAGTGATGGGA  
GTTAGCAAGTCTGATTCTAAGTGCTCTACTGTTGGAATCCAAGGTATTGCTTGGGCATTCCGTGGCATGATCTTT  
GCCCTTGTTTACTGCACCGCTGGAATTTTCAGGGGGGCATATAAACCCGGCAGTGACATTTGGGCTGTTTTTGGCC  
AGGAAATTTGTCATTGACTCGGGCTATATTCTACATGGTGATGCAGTGCCTAGGAGCCATATGTGGTGCTGGTGTG  
GTTAAGGGGTTTCGGAAGACCCCTGTACATGTCCAAGGGTGTTGGTGCTAATGTTGTAGCTCACGGTTACACCAAG  
GGTAGTGGCCTAGGTGCTGAAATTATAGGTACCTTCGTTCTCGTTTACACCGTTTTCTCTGCTACTGATGCCAAA  
CGTAGCGCCAGAGACTCTCACGTTCCAATATTAGCCCCCTTGCCATTGGGTTTGCCGTGTTCTTGGTGCACCTG  
GCGACCATCCCTATTACAGGTACTGGTATTAACCCCGCCAGGAGTCTTGGTGCAGCAATCATCTACAACAAAGAC  
AAGGCATGGGATCATCTAGGATATTCTGGGTTGGACCATTCAATTGGGGCAGCACTTGCAGCTCTCTACCATGTG  
GTTGTGATAAGAGCCATCCCATTCAGAATAAGTGA

>OeuPIP1;2\_Oeu018133.1

MESKEEDVRVGANKFNERQPIGTAAQSQDKDYKEPPAPLFEPELSSWSFYRAGIAEFIAITFLFLYITILTVMG  
VSKSDSKCSTVGIQGIAWAFGGMIFALVYCTAGISGGHINPAVTFGLFLARKLSLTRAIFYMVMQCLGAICGAGV  
VKGFGLTLYMSKGGGANVVAHGYTKGSLGAEIIGTFVLVYTVFSATDAKRSARDSHVPILAPLPIGFAVFLVHL  
ATIPITGTGINPARSLGAAIIYNKDKAWDDHWIFWVGPFIGAALAALYHVVVIRAI PFKNK\*

OeuPIP1;3 Oeu042329.1

**Observation:** Protein 100% Homolog to PIP1.3 A0A1D5AHZ7 from UniProtKB

>OeuPIP1;3\_Oeu042329.1 | chr13:11012950..11015602 forward

ATGGCAGAAAGCAAGGAAGAAGATGTTAAACTTGGAGCCAACAAGTTCACAGAGAAGCAGCCATTAGGCACAGCG  
GCTCAAACAGACAAGGACTATAAGGAGCCACCACCAGCACCTTTATTTGAGCCTGGAGAATTGACATCATGGTCC  
TTTTACAGGGCTGGAATTGCAGAATTCATAGCCACTTTCTGTTCTTGTACATATCTATTTTGACTGTATGGGT  
GTTTTCAGTGCAAAGAACAAGTGTGCCTCTGTGGGCGTCCAGGGAATTGCTTGGGCCTTTGGGGGTATGATCTTT  
GCACTTGTCTACTGTACTGCTGGTATCTCAGTGCAGTCCCTAAAACCCCTTTCTATCTTTACTTTTAATTTACC  
CTTTTTTTTTTTTCAAATTGCTTAATTTTTCTTTTTCTTTTTTATTTTTTGGACTTCTCTCTGTATATCTTTTTTTT  
TAGTCCTTCTTTTTACGATCTTTGACTCAAAAAAGTTCTTCAATCGGTTTGTGGGTCTTTAGAGATTCTTGAGGA  
AATTTATTCAGTTGAGTAGTAGTATTTGTGTGTTCTTCTTTGTATTGGAATAATTTGTGGCTTTTATTGTTTC  
TGTTTATCTGTATAAGTGCTTAGTTTAACCACGGGCTAGCTACATCGATGATATTTGGAACATAAGATTGTATCT  
TTGTGATTTCTTGAAATTTTTTTGACTTTTTTTCAGTGTAAGCTGTTTGGCTAAGCTTAAATGTTTGCTTATAAG  
CAAATAAGTATTAATAATAATTACTAGCTTAGTAAGGTAAAGTGTATTAGGTATATACACTAACGTTTTTCTTCTA  
CTTTGATGGTAAGGTAAAAATTGTTATGACCATGTTAACAAGGTTGATCTTATTAAGAGGAATGACTCGATATCT  
ATCTAAGTTGGTCAATATTTTCGATATTTAATCAATACGTGATTTATTCTCTTAACATGCTCCCGCAAAATAATGG  
CTCTTTTTTAGCAGCAATTTTGAATTCGTGTTCTTATTATTGAGACTTAATCGGATCGAATAGCTCGTTGGA  
GTTACTGGGCTCTGATATCGTGTTAACAACCTTACTAGGAGTGGCCAAAATCTATTTAAGTTGGTCAATATTTT  
GGTATTTAACCGACGTGTGATTTATTCCCTTAACAAAAATTTGTCAAAATATGTAAAAAAATTTATTTTTATAGCT  
TAGCTAGACATAAGTGAGGGAAAAGTAAGATATTGAAACATTTTTGAAACGGAAATTTACTTATGAGCAACTTTT  
AAACTACTTTTGATGAAGCATATTTAAATTTTTCTTGTGTTGCATGTTAAACAGGAGGGCACATCAACCCAGCTGT  
GACCTTTGGCTTGTTCTTGGCAAGGAACTTTCTTTGATCAGGGCTTTATTTTACATGGTGATGCAGTGCCTGGG

**>0euPIP1;3\_0eu042329.1**

**>0euPIP1;3\_0eu042329.1**

**OeuPIP1;4    Oeu052954.1**

[illegible]

TATTATGGAGCCTTACGATAGGCGTAGCCTTTGATTTTTCTTCTAGTACATAGTTGGGCTAGAAATCAGTAATTT  
ATGCCAAAACCTGAATCTTAACGTGGGATGCCAAATTGATGACTCCTTTGATCTTCCAAATTTACACAGATTTTGG  
CTCCACTCCCAATTGGATTTGCCGTCTTTTTGGTTCACTTGGCAACCATCCCCATCACCGGAACTGGCATCAACC  
CAGCCAGAAGCCTTGGCGCCGCCATCATTTACAACAAAGATCATGCTTGGGATGATCACGTAAGTTTACTTCATT  
AACTTCCACAGACAATCTTCTTACCTGTTTCATGACATTTTTGGCGTCCATACATAAAACATTTTTGTTCATGTGC  
CTTTCTTCAGTGGATCTTCTGGGTGGACCTTTTCATTGGAGCTGCCCTTGCTGCACTTTACCATCAGGTTATCAT  
TCGAGCCATCCCATTAAAGAGTAGCAGCTGA

>OeuPIP1;4\_Oeu052954.1

ATGGAGGGTAAAGAGGAGGATGTGAGGCTAGGAGCCAACAAGTTCACAGAGAGGCAACCATTTGGGTACCTCAGCA  
CAGAGCAAGGACTACAAGGAGCCACCTCCAGCTCCACTTTTTGAGCCTGGTGAACCTCCAGTCATGGTCCTTTTGG  
AGAGCTGGGATTGCTGAGTTTATAGCTACTTTCTTGTCTTTATATCACAACTTGTACTGTAATGGGTGTCAGC  
AGGTCTGGCAGCAAGTGTGCTTCTGTGGGTATTACAGGGCATTGCTTGGGCCTTTGGTGGCATGATTTTTGCCCTT  
GTCTACTGCACTGCTGGCATCTCAGGTGGACACATAAATCCTGCAGTAACATTTGGTCTGTTTCTAGCAAGAAAA  
TTGTCTCTAACAGAGCAATTTTTTACATCGTGATGCAATGTCTCGGAGCAATCTGTGGTGTCTGGTGTCTGTAAG  
GGCTTCCAGCCTTCTTTTTACAAGGCTAATGGTGGTGGTGCTAATGTTGTTTCCCATGGTTACACCAAGGGCGAT  
GGACTTGGTGTCTGAGATTATTGGCACTTTTTGTTCTTGTTTTACACTGTCTTTTCTGCTACTGATGCCAAGAGAAAT  
GCCAGAGACTCACATGTCCCTATTTTGGCTCCACTCCCAATTGGATTTGCCGTCTTTTTGGTTCACTTGGCAACC  
ATCCCCATCACCGGAACTGGCATCAACCCAGCCAGAAGCCTTGGCGCCGCCATCATTTACAACAAAGATCATGCT  
TGGGATGATCACTGGATCTTCTGGGTGGACCTTTTCATTGGAGCTGCCCTTGCTGCACTTTACCATCAGGTTATC  
ATTGAGCCATCCCATTAAAGAGTAGCAGCTGA

>OeuPIP1;4\_Oeu052954.1

MEGKEEDVRLGANKFTERQPLGTSAQSKDYKEPPAPLFEPEGELQSWSFWRAGIAEFIAFLFLYITILTMGV  
RSGSKCASVGIQGIAWAFGGMIFALVYCTAGISGGHINPAVTFLGLFLARKLSLTRAIFYIVMQCLGAICGAGVVK  
GFQPSFYKANGGGANVSHGYTKGDGLGAEIIGTFVLVYTVFSATDAKRNARDSHVPILAPLPIGFAVFLVHLAT  
IPITGTGINPARSLGAIIYNKDHAWDHWFVWGPFIGAALAALYHQVIRAIIPFKSSS\*

## OeuPIP1;5 Oeu061384.2

**Corrected as follow :** Third predicted Exon as part of the intron, generating introns 2 and 3 as one. Ultimately, this gene including only 4 introns.

>OeuPIP1;5\_Oeu061384.2 | Scaffold87:524214..526575 reverse **Original version**

ATGGCAGAAAACAGGGAAGAGGATGTTAGGCTTGGAGCCAACAAGTTTACTGAGAAGCAGCCTTTGGGTACAGCT  
GCTCAAACAGACAAGGACTACAAGGAGCCACCTCCAGCCCCCTTTGTTTGGAGCCTGGGGAGATTAAATCATGGTCT  
TTTTACAGGGCTGGTATTGCAGAGTTTGTGGCTACCTTCTTGTCTTGTACATTACCATTTTGTACTGTCATGGGG  
GTTGGTAGATCAAATAGTAAGTGTGCCTCTGTGGGCATCCAGGGGATTGCTTGGTCCTTTGGTGGCATGATTTTT  
GCATTGTATATGCTGCACTGCTGGGATTTACAGTTAGTTTATTTTTGTTTTTTTAAATCTCACTTAATCTTGTTTT  
TCTTTGCATGTTTCTGTTTGTCTTTTACTGTGAGTCTTGGCAAAATTGTGTATTTTCTTTGTTTTTATGGGTT  
TCTGGGGTTTTGTTTTGCCAGATTGATTATGAATTATTGTTACTGGATCTTGTAAATAAGTTTTTAAATTGATCC  
ATTTAGATATTATTTGCGATAAAAGCTAGGATCTTGGTGATTTTTTTCAGGAACTCCAGTTTTAGATTATATGCT  
ATGGCTTAGGGTACCCGCACCCTAACCCCTCTTAGACCATTGTCTATTATATGTAGCTTCAAACCTGATTTTCTG  
TATTGGCCGTTGAACAGGAGGGCACATCAACCCTGCTGTGACCTTCGGTTTGTCTTGGCAAGGAAGCTTTCCTT  
GACCAGAGCTATCTTCTACATAGTGATGCAGTGCCTTGGTGCAATCTGTGGTGTCTGGTGTGTCAAGGGATT  
GGAGGGTCCATACCAGAGGCTACAAGGTGGGGCCAACGTTGTGCAGCATGGCTACACCAAGGGTGATGGCCTTGG  
TGCTGAGATTGTTGGCACTTTTATTCTTGTTTTACACTGTCTTCTCTGCCACTGATGCCAAGAGAAACGCCAGAGA  
CTCGCATGTTCCAGTAGGTCTTCTTTGTGCGGTTATGCACTGATATTAACCTTTTGGTTGCTTAAACTTGTTTGGA  
AAGGCTGGATTGTTGTGCCTTGATTTGTTTTTGTACTTCTAATTAAGCGTTCATACCCAAGAAAGGAAGAATCG  
ATAATTTTATTATGTTTTGTGTAGCTGGAATGCTACATTTCTCTGATTTTCATTTTCGCTAATATTTGGTTTATAT  
TATAAACTGTTTAGAAACGCTCAATTCATTTATGTCCACACATTTCTAAGGACCCACAACCACAAGTACTGCC  
ACTCCAACGCGACTCATTTCTACCTATTTATAATTTAAACCATCTTATAAAACAACCTTTCCAAACATGCTTTT  
TAGATGTTGAGCAATTTTGTCTATTTAGCCTCAGTTCATTCAATGCAATCTTGACATGATATGGGCCAATATCTTT  
TAGTACTGAAATTCGGTTTAGACCAAACTGACCCTATACTGAATGTCTATGATCATAGCACAAAGGTTTGTCTTT  
CAAGTATCGCCCCACGCAAAATTTTCTGTTTTGCTTTGATGATGCATTACAGCTTATTTGTTGGTTTATAAATCT  
TATGTCCTGTGCTTAAGCAGGGGTGGAAGATGGGGTTAGGATGATGTGCAGTTTTGATAATTTGATGTGCTTTTGG  
TAATGTGGCTTTTTAGCTGTTCATGGAACCCACAACCTAAAATATTTATTCTCATTCTATCTTTTGAGAAGAAA  
GAGTTGTGAAGCAGTTGCATTAAGTGGTTTTATTCTCATCATAGGGAATGTTGGCAGCTCCAATTTGGTCTTTT  
TAGCACCATAGGCACATAACACCATCAATTAATTGAGCTATTGATTTGGTTCGAAGTCTCAAATTTTATTGTTATC  
ACATGGAACATTAATGTAGACTACGATTCTTGGTAATATAATTGTGTGATTGTACATAATGATTCGGAGAAA  
CAACAAAAGCTCATGACGATTAGCTTCTTGATTTTGATAAGAGAATTCATGTAGTAGTTCTAAAATCTTTTATG  
TTTCAGCTTTTGGCTCCTCTCCCCATTGGGTTTGCAGTATTTTTGGTTTCATCTGGCCACCATCCCCATCACTG  
GAACAGCA

TCAACCCTGCCAGGAGTCTTGGAGCTGCCATTATTTACAACAGAGATAACGCATGGGACGACCATGTAAGAATCTCTCTATGCAGATCCTTTATAACTCTCGTAATTATTAATCAGTAGTACATTTTCAACTAAAACCATTTGTTTCTTTACGTCTCCAGTGGATCTTCTGGGTCGGACCCCTTCATTGGAGCTGCTCTTGCTGCTATTTACCACCAGATTGTGATCAGAGCCATTCTTTCAAGAGCAGCCAGGCCTGT**TAA**

>OeuPIP1;5\_Oeu061384.2 **Corrected version**

**ATG**GCAGAAAACAGGGAAGAGGATGTTAGGCTTGGAGCCAACAAGTTTACTGAGAAGCAGCCTTTGGGTACAGCTGCTCAAACAGACAAGGACTACAAGGAGCCACCTCCAGCCCCTTTGTTTGAGCCTGGGGAGATTAAATCATGGTCTTTTTACAGGGCTGGTATTGCAGAGTTTGTGGCTACCTTCTTGTTCTTGTTACATTACCATTTTGACTGTCATGGGGTTGGTAGATCAAATAGTAAGTGTGCCTCTGTGGGCATCCAGGGGATTGCTTGGTCCTTTGGTGGCATGATTTTTGCACTTGTATACTGCACTGCTGGGATTTTCAGGTTAGTTTATTTTTGTTTTTTAATCTCACTTAATCTTGTTTTTCTTTGTCATGTTTCTGTTTGTCTTTTACTGTGAGTCTTGGCAAATTTGTGTATTTCTTTGTTTTATGGGTTCTGTTGGGTTTCGTTTTGCCAGATTGATTATGAATTATTGTTACTGGATCTTGTTAAATAAGTTTTTAATTGATCCATTTAGATATTATTTGCGATAAAAGCTAGGATCTTGGTGATTTTTTTCAGGAACTCCAGTTTTAGATTATATGCTATGGCTTAGGGTACCCGCACCCTAACCCCTCTTAGACCATTGTCTATTATATGTAGCTTCAAACTGATTTTCTGTATTGGCCGTTGAACAGGAGGGCACATCAACCCTGCTGTGACCTTCGGTTTGTCTTGCCAAGGAAGCTTTTCCTTGACCAGAGCTATCTTCTACATAGTGATGCAGTGCCTTGGTGCAATCTGTGGTGCTGGTGTGTCAAGGGATTTCATGGAGGTCCATACCAGAGGCTACAAGGTGGGGCCAACGTTGTGCAGCATGGCTACACCAAGGGTGATGGCCTTGGTGCTGAGATTGTTGGCACTTTTATTCTTGTTTACACTGTCTTCTCTGCCACTGATGCCAAGAGAAACGCCAGAGACTCGCATGTTCCAGTAGGCTTCTCCTTTGTCGGTTATGCATGATATAACTTTTGGTTGCTTAACTTGTTTGGAAGGGCTGGATTTGGTGCCTTGATTTGTTTTTGTACTTCTAATTAAGCGTTCATACCCAAGAAAGGAAGATCGATAATTTTATTATGTTTTGTGTAGCTGGAATGCTACATTTCTCTGATTTTCAATTCGCTAATATTTGGTTTATATTATAAACTGTTTAGAAACGCTCAATTCACCTTATGTCCACACATTTCTAAGGACCCACAACCACAAGTACTGCCACTCCAACGCGACTCATTTCTACCTATTTATAATTTAAACCATCTTATAAACTTTCCAAACATGCTTTTAGATGTTGAGCAATTTTGTCTTATTTAGCCTCAGTTCATTCAATGCAATCTTGACATGATATGGGCCAATATCTTTAGTTACTGAAATTCGGTTTAGACCAAACCTGACCCTATACTGAATGTGCATGTATCATAGCACAAGGTTTGTCTTTCCAAGTATCGCCCCACGCAAAATTTTCTGTTTTGCTTTGATGATGCATTTCAGCTTATTTGTTGGTTTATAAATCTATGTCCTGTGCTTAAGCAGGGGTGGAAGATGGGGTTAGGATGATGTGCAGTTTTGATAATTTTGATGTGCTTTTGGGTAATGTGGCTTTTTAGCTGTCTACATGGAACCCACAACCTTAAATATTTATTCTCATTCTATCTTTTGAGAAGAAAAGAGTTGTGAAGCAGTTGCATTAAGTGGTTTTATTCTCATCATAGGGAATGTTGGCAGCTCCAATTGGTCTTTTAGCACCATAGGCACATAACACCATCAATTAATTGAGCTATTGATTTGGTCGAAGTCTCAAATTTTATTGTTATCACATGGCATTAATGTAGACTACGATTCTTGGTAATATAATTGTGTGATTGTACATAATGATTCGGAGAAACAACAAAGCTCATGAGATTAGCTTCTTGATTTTGTATAAGAGAATTCATGTAGTAGTTCTAAATTTCTTTTATGTTTTCAGCTTTTGGCTCCTCTCCCCATTGGGTTTGCAGTATTTTTGGTTTCATCTGGCCACCATCCCCATCACTGGAACCAGCATCAACCCTGCCAGGAGTCTTGGAGCTGCCATTATTTACAACAGAGATAACGCATGGGACGACCATGTAAGAATCTCTCTATGCAGATCCTTTATAACTCTCGTAATTATTAATCAGTAGTACATTTTCAACTAAAACCATTTGTTTCTTTACGTCTCCAGTGGATCTTCTGGGTCGGACCCCTTCATTGGAGCTGCTCTTGCTGCTATTTACCACCAGATTGTGATCAGAGCCATTCTTTCAAGAGCAGCCAGGCCTGT**TAA**

>OeuPIP1;5\_Oeu061384.2

**ATG**GCAGAAAACAGGGAAGAGGATGTTAGGCTTGGAGCCAACAAGTTTACTGAGAAGCAGCCTTTGGGTACAGCTGCTCAAACAGACAAGGACTACAAGGAGCCACCTCCAGCCCCTTTGTTTGAGCCTGGGGAGATTAAATCATGGTCTTTTTACAGGGCTGGTATTGCAGAGTTTGTGGCTACCTTCTTGTTCTTGTTACATTACCATTTTGACTGTCATGGGGGTTGGTAGATCAAATAGTAAGTGTGCCTCTGTGGGCATCCAGGGGATTGCTTGGTCCTTTGGTGGCATGATTTTTGCACTTGTATACTGCACTGCTGGGATTTTCAGGAGGGCACATCAACCCTGCTGTGACCTTCGGTTTGTCTTGCCAAGGAAGCTTTTCCCTTGACCAGAGCTATCTTCTACATAGTGATGCAGTGCCCTTGGTGCAATCTGTGGTGCTGGTGTGTGCAAGGGATTTCATGGAGGGTCCATACCAGAGGCTACAAGGTGGGGCCAACGTTGTGCAGCATGGCTACACCAAGGTGATGGCCTTGGTGCTGAGATTGTTGGCACTTTTATTCTTGTTTACACTGTCTTCTCTGCCACTGATGCCAAGAGAAACGCCAGAGACTCGCATGTTCCACTTTTGGCTCCTCTCCCCATTGGGTTTGCAGTATTTTTGGTTTCATCTGCCCACCATCCCCATCACTGGAACCAGCATCAACCCTGCCAGGAGTCTTGGAGCTGCCATTATTTACAACAGAGATAACGCATGGGACGACCATATTGTGATCAGAGCCATTCTTTCAAGAGCAGCCAGGCCTGT**TAA**

>OeuPIP1;5\_Oeu061384.2

MAENREEDVRLGANKFTEKQPLGTAAQTDKDYKEPPAPLFEPEIKSWSFYRAGIAEFVATFLFLYITILTVMGVGRSNSKSCASVGIQGIAWSFGGMIFALVYCTAGISGGHINPAVTFLGLFLARKLSLTRAIFYIVMQCLGAICGAGVVKGFMEGPYQRLQGGANVVQHGYTKGDGLGAEIVGTFILVYTVFSATDAKRNARDSHVPLLPPIGFAVFLVHLATIPITGTSINPARSLGAIIYNRDNAWDDHWIFVWGPFIGAALAAIYHQIVIRAIPFKSSQAC\*

OeuPIP1;6 Oeu046350.1



>OeuPIP1;6\_Oeu046350.1 | Scaffold4751:4496..7173 forward

**ATG**GAGGGTAAAGAGGAGGATGTAAGGCTAGGAGCCAACAAATTCACAGAGAGGCAGCCATTGGGTACCTCAGCA  
CAGAGCAAGGACTACAAGGAGCCACCTCCAGCTCCACTTTTTGAGCCTGGTGAACCTCCAATCATGGTCCTTTTGG  
AGGGCTGGGATTGCTGAGTTTATGGCCACTTTCTTGTTCCTTTATATCACGATCTTGACTGTAATGGGTGTGAGC  
AGGTCTAACAGTAAGTGTACTTCTGTGGGTATTACAGGGCATTGCTTGGGCCTTTGGTGGCATGATTTTGGCCCTT  
GTCTACTGCACTGCCGGCATCTCAG**GTCTCTGTCTCTCAATTTGTGTGTGTTCTGTTCTCTGTCTACTTAAATAAA**  
**TTTAGGGTCTGCTGTTTGGTAGTGGA**CTGGATTTATAATGAACAAGATTTAACTTCGAACCTGCCAAGAATGTAT  
TAGTACTACTAATATTGAGTTCTCATTTTTTCATGGGATCTTGGA  
AAATGTAAAGCATGCAGCTTCTGTCTAAGTTC  
TACTACCTGTTGCTTAAGTGAATCGAGAGTCTTGCTAGTTTGGTATGCAGTATTAGATGGAAGCTAGTAGTATAAA  
GAACAAGATTATATCTTCGAACATGCCAAGAATGTTAATGCACCACTAATTATGAGTCCATATTTTCATGGGATC  
TTGAAAAATGTAAGTATGCGGCTTCTTTTTGTTTTTTATAATCTGTTGCTTAAGTAAATATCGAGTCTTGTGTGT  
TTCGTGTGTAGAAGTGGATGGAATTATATCACATAATGTACAAGTATGATCTTCAAACATGCCAAGAATGTACTA  
CTAGTTTTAAAAAATCTCGAGTCTTGATGCTGGATGGAACATATATAGTATAATGAACAAAATTTGACAACATGC  
CAAGAATGTACCACTGGTTTAAAGTAAATCTAGATTCTTGGTAAGCAATACCAGACAACATTGAATAGTGAACAAG  
ATTTGATCTTTAAACATGACAAGAAGCTCCTATTACTAGAGTCTTGCCCTGTTTAAATACGTAGTATACGATGAGAC  
TAAATAATATAATGAACAAGATTGATCTTCTAACATGCCAAGAATATACTACTAAGTAAATCCAGAGTCTCGACT  
GTTTGGTAGCAATATTGGACAAGACGATTTTATCCTCCAAAAAAGACAAGAATGTACTAATACTTTTGAACCCCTC  
ATTTTCACTGGGATTTTGGCAAATGGAAAGTAGAGCTAATTTGTTATTGTTTGTGATAAATTGCTGTTGTTTTTGA  
GTTTTAAGTCTTGAATGTCACAGAATTTAAACCCGTCTTCTCTTTTTTCAAATCCTGCTAAAATTTAATGGTTT  
TTGTTCTTTTAGTTCTACTCTCCTTGATGCTAAGCAAAAAATATTTCTTCAAATATGAGTTCAACTTATAATTCA  
TACAAAAAAGGCCAAATCTTTGATATAATTTCTGGA  
AAAGAAGTATGATAATGCCCTTGTTTA  
AAGATTATTGGAGCTTTTCATGTGCTGATATTTGAAATTTTTTATGGGTAATTT**CAG**GTGGACACATAAATCCTG  
CAGTAACATTTGGTCTATTTCGTAGCAAGGAAATTGTCTCTGACCAGGGCAATTTTCTACATTGTGATGCAATGCC  
TTGGCGCAATCTGCGGCGCGGGTGTCTGTAAGGGCTTCGGGCCTTCTTTTTACAAGGCTAACGGTGGTGGTGCTA  
ATGTTGTTGCCCATGGTTACACTAAGGGTGATGGACTTGGTGCTGAGATTATTGGCACCTTTGTTCTTGTTTTACA  
CTGTCTTCTCTGCTACTGATGCCAAGAGAAATGCCAGAGACTCGCATGTCCCT**GTGAGTATTTCTTTTTTAATCGT**  
**GATTTTGAAAAGTGT**TTTACTTTCAATGCAGTTTAGTATTAGTATTATTTTTTATGCTGAGGAAGGTATCATAGA  
TATTTTAACCATGTATTCTTGCCCTCGTCGGCTATAGATTATGTTTGTGTTGGGAAAATTGGACTTTCTTCATTGA  
GAGTGGGCAAGACCCGGTCTGCATTCTGTTTGATTGTGCTCGATCTGAAATTCGAGTCTTGAAAAGATATGTTG  
GGCTACGATGGAATGATTTGGTCAATCAATAGTGTGCTCGAGCACTTTGATTGCAAATCTGAAGTGTCTGATTGC  
ACTTTCTTTTGCACCTTTGATTCTTCTTCTATTTCATGGTCAAACCTAGAAACGAGTAATTTTGCAGATTTAACCTG  
GCCTCAACTGTATGATTTGTGCCATAACTAGAATCTCATTGTGGGATGCCATCTTGATGACTACTAATTTTTTCGA  
**ATTTTCATAGATTTTAGCTCCACTCCCAATTGGGTTTGCCGTCTTTTTGGTTCACTTGGCAACAATCCCCATCACT**  
**GGAACCGGTATCAACCCAGCCC**GAAGCCTTGGTGCTGCCATCATTTACAACAAAGATCACGCTTGGGACGACCAT  
**GTAAGTTTTACGTCTGTA**ACTTCCATAGACTATGTTCTTACCTGTT**CATGACATATGATTAGGCGCCCGGCCGTA**  
**CTTATATTTGTGTCACTTCTGTCTTTCTTCAG**TGGATCTTTTGGGTCGGACCTTTCATCGGAGCTGCACCTCGCTG  
CCCTTTACCACCAGTTATCATTAGAGCTATCCCATTCAAGAGTGGAAC**TGA**

>OeuPIP1;6\_Oeu046350.1

**ATG**GAGGGTAAAGAGGAGGATGTAAGGCTAGGAGCCAACAAATTCACAGAGAGGCAGCCATTGGGTACCTCAGCA  
CAGAGCAAGGACTACAAGGAGCCACCTCCAGCTCCACTTTTTGAGCCTGGTGAACCTCCAATCATGGTCCTTTTGG  
AGGGCTGGGATTGCTGAGTTTATGGCCACTTTCTTGTTCCTTTATATCACGATCTTGACTGTAATGGGTGTGAGC  
AGGTCTAACAGTAAGTGTACTTCTGTGGGTATTACAGGGCATTGCTTGGGCCTTTGGTGGCATGATTTTGGCCCTT  
GTCTACTGCACTGCCGGCATCTCAGGTGGACACATAAATCCTGCAGTAACATTTGGTCTATTTCGTAGCAAGGAAA  
TTGTCTCTGACCAGGGCAATTTTCTACATTGTGATGCAATGCCTTGGCGCAATCTGCGGCGCGGGTGTCTGTAAG  
GGCTTCGGGCCTTCTTTTTACAAGGCTAACGGTGGTGGTGCTAATGTTGTTGCCCATGGTTACACTAAGGGTGAT  
GGACTTGGTGCTGAGATTATTGGCACCTTTGTTCTTGTTTACACTGTCTTCTCTGCTACTGATGCCAAGAGAAAAT  
GCCAGAGACTCGCATGTCCCTATTTTAGCTCCACTCCCAATTGGGTTTGCCGTCTTTTTGGTTCACTTGGCAACA  
ATCCCCATCACTGGAACCGGTATCAACCCAGCCCCGAAGCCTTGGTGCTGCCATCATTTACAACAAAGATCACGCT  
TGGGACGACCATTGGATCTTTTGGGTCGGACCTTTCATCGGAGCTGCACCTCGCTGCCCTTTACCACAGGTTATCA  
TTAGAGCTATCCCATTCAAGAGTGGAAC**TGA**

>OeuPIP1;6\_Oeu046350.1

MEGKEEDVRLGANKFTERQPLGTSAQSKDYKEPPAPLFEPEGELQSWSFWRAGIAEFMATFLFLYITILTVMGVS  
RSNSKCTSVGIQGIAWAFGGMIFALVYCTAGISGGHINPAVTFGLFVARKLSLTRAIFYIVMQCLGAICGAGVVK  
GFGPSFYKANGGGANVVAHGTYTKDGLGAEIIGTFVLVYTVFSATDAKRNARDSHVPILAPLPIGFAVFLVHLAT  
IPITGTGINPARSLGAIIYNKDHAWDHWFVWGPFIGAALAALYHQVIIIRAIPFKSGN\*

## PIP1-related sequences. Considered as Pseudogenes

### Oeu022396.1 OeuPIP1-related

>Oeu022396.1 scaffold1994:48682..48948 forward

Incomplete sequence

>Oeu022396.1

ATGAGAGCCATATGTGATGTTGGTATGGTTAAGGGATTTCAGAAAGACCCTATACATGACCAAGGGTGGTGGTGCT  
AATGTAGTAGCCTACAGTTACACCAAGGGTGATGCCCTAGGTGCTGAAATTGTCGTTACCTCTGCGCTCGTTTAC  
AATATTTTCTCTTCTACTGATGCCAAACATAAAGCTAGAGACTCACAAGTTCCTGTAAGCATTCCACCTGTCTTT  
GCAAGCCTGTTTCTCTTGACATTATTGATTAGACTTAAGTGA

>Oeu022396.1

ATGAGAGCCATATGTGATGTTGGTATGGTTAAGGGATTTCAGAAAGACCCTATACATGACCAAGGGTGGTGGTGCT  
AATGTAGTAGCCTACAGTTACACCAAGGGTGATGCCCTAGGTGCTGAAATTGTCGTTACCTCTGCGCTCGTTTAC  
AATATTTTCTCTTCTACTGATGCCAAACATAAAGCTAGAGACTCACAAGTTCCTGTAAGCATTCCACCTGTCTTT  
GCAAGCCTGTTTCTCTTGACATTATTGATTAGACTTAAGTGA

>Oeu022396.1

MRAICDVGVMVGFRKTLTYMTKGGANVVAYSITKGDALGAEIVVTSALVYNIFSSTDAXHKARDSQVPVSI PPVF  
ASLFLLTLLIRLK\*

### Oeu010785.1 OeuPIP1-related

>Oeu010785.1 | chr3:8511236..8513098 reverse

Incomplete sequence

>Oeu010785.1

ATGGGAGCCATATGTGGCGTTGGTGTGGTCAAGGGATTTCGAAAGAACCTGTACATGACCGAAGGTGTTGGTGCT  
AATGTTGTAGCCTACGTTGCACCAAGGGTGATGCCCTAGGTGCTGAAATTGTTGGTACCTCTACACTCGTTTAC  
ATTGTTTTCTCTACTACTGATGCCAAACATAGAGCCAGGGACTCACACGTTTCTGTAAAGCACTCTTGCTTTGTGA  
GGCTGTTTCTCTTGACATTATTGATTAGACTTAAGCGAATATAAATCATTCTTCATATTAGTTATGATTAAATGT  
GATTGAGCTTGAACAAGAATTATCTTCTGTATCTGCAAGAATTGATAAATCAAACATGATATTATTGATAACGA  
AAAAGTTTGATTAATTGGATTTCTAATACTCTAATTCAATGGTTTTCAAATATTGGCCTCCTTGCCCATTTGGGT  
TTGCCGTGTTCTTACCAATACAGGTATTAGTCGTGCCAAGAGTCTTGGTGCAGCAAAACATCTACATTCAAGAGCA  
GGCATGGGATGATCACGTAAGCTAGAAATTGAACACTTACCTAGACAATTATATCCTAACAACCACTACATGTC  
GTGTTAACTTTTGACAGGGACGGAGCTAGACATTTGGTGTGTGGGGTCAAATTTAAATACAATTTCTTTTAGAA  
CAACATATCATAATATGTTATTTTTGAACACTCGCTTCAACTACATTTTGTCTGCACTCGAAAATAAGGGTTTTT  
ATTTAAATATTTCTCCATGAATGTTACAAATCAAATTCATATTAGCAAGATATGAGCACGGCATCTAGATGA  
GAGAATTTTCTATTTCAATTGAATAAATAGTAAGAAGAAACAAGATGACATCAACTTTTTTTTTTTTTTTTAA  
TACTATTAGAGACCAAAATCATACTTTCCAGATTACACAAAAATTTTATAGTTGTCTTCTTGATTTCTTATTTAT  
AATTGCAACAATTAGATCCAAACCCCATAAATTTAACCGGATAAGGATAAATGCATGATTCTCAAAGGCATCAAA  
TAATCACAAAAAAATTTATCCGAATTAGATATTGGTAATTTCCATAATATGGCAATGCCGACTTGTTTAGATGTT  
TATGTTTTTTTCTGTAGACTAGATAATAACTAATAAGCGATGGGGAATTGGGGATTATAGTTGAAAATATTTCT  
CAAATCTCAAATTCATTTCAATTGAATTTTAGAATAAAAAATATGTAAAATCAAACAAGTAGGGTATCGATTT  
GTTATCTAAATGGAAGAAAGATCACAAAGTTAGCACAAAGAAAGAAAATCTCAAACGTGAAGGAATCGAAAGAAT  
GGAGTTGGATAGGTGAAATAAAAAATTAATGGGCCTGTGCATTTGGGCTTGCCAATAAACAATTTGGACAATGTTAT  
ATTTTAATCTTTAGTGTAACCAAAAAAAATCCAGAAATTTGTGTGGTGTCAACGGACCCACATGACCCCATGC  
GGGTCCATCAGCGAACTTTAACATGTATAAAGGTTTCGCATGGTAAGATGCGACAAATTTTACGTTGTTCACTTA  
CCACAACCTCTTTTATTTATTTTGTAGACAACCTTTGAAAATTTTGTAAAATTTGGCAAATGGGATTGATAAGAT  
TGGCTAAAGTTTGTCTCGCTCCCCTGCTCTGATAATATGCAATGGATATTCTGGGTTATTCCATTCAATTAG  
GGCTAGACTTTTGTCTGTAAACATATGGTTTTTGGTGGGAAGAGACGATGACAGTGGAATGAAGAGAGGCGGTTAT  
AGAAGTGGTGAAGAGGGGGAAGGGAAGGGAGCAAGGTTATAGATGAGCCACATCGAAGTTAG

>Oeu010785.1

ATGGGAGCCATATGTGGCGTTGGTGTGGTCAAGGGATTTCGAAAGAACCTGTACATGACCGAAGGTGTTGGTGCT  
AATGTTGTAGCCTACGTTGCACCAAGGGTGATGCCCTAGGTGCTGAAATTGTTGGTACCTCTACACTCGTTTAC  
ATTGTTTTCTCTACTACTGATGCCAAACATAGAGCCAGGGACTCACACGTTTCTGTATTAGTCGTGCCAAGAGTC  
TTGGTGCAGCAAAACATCTACATTCAAGAGCAGGCATGGGATGATCACAGACGATGACAGTGGAATGAAGAGAGGC  
GGTTATAGAAGTGGTGAAGAGGGGGAAGGGAAGGGAGCAAGGTTATAGATGAGCCACATCGAAGTTAG

>Oeu010785.1

MGAICGVGVVKGFGKNLYMTEGVGANVVAYGCTKGDALGAEIVGTSTLVYIVFSTTDAKHRARDSHVPVLVVPV  
LVQQTSTFKSRHGMITDDDSGMKRGYRSGGRGGREGSKVIDEPHRS\*

[illegible]

AGGCCAAACCTATAATTTTTTTTATTATCAATTTGACAAATGAAACAAAAAAGAAAGTTGAAATTTCTTACTTTAA  
AGGAAAAGCAATTATGACAAGTTTCAAGTTATTATAGTTGTTGTTGGATAAAACTTTGGGGGAAATTTTGCTCTGTG  
AATATGTCAAGTTCTTGTGTGAGTACATCGAAATTACCAGAGATTGGAGACTAGGAGTACTCCTAAAAATTTTGCCA  
GCTGCAGCTGAAGAGAAAGAAATACATTCATTTGAAATTGACCCTGCACAAAGTAGGGTTAATTAGTTCTGTCAAAA  
TAATCTCCTATTTTCTTCATTTTAAATGTAGACAGCAGTTGTGATGATGATCTTTCATTTCAATCTGGACT  
TTACTATGACTGGGCTTCAACATATATGTGTAATTGTTATTCTTCAATGGACAATTCTAAGTGTACATAATTTG  
GTTTACCAAATCATTACCTACTCTCACAAGCACGTGGACCCCGCGTGAATAAAATAATTCCAACATGTGGTCCC  
CACACCCCTATTGTAAGTGTATGTAAACATTATGTAAAGAAAAATTAGGTACATCTAGCATGGTCTTCTTCAAT  
GTGTGTATAGTATTCTGTGCATTGTCTTGGAAAGCTAGGTCTAAAATATGTATATCCAATAGGTTTCTTTGGTTTG  
GATATATTTCTTCACTAAAGAATATTTAATGTCGTTACTTTTCAAGAAATAATTGGAACCATCTTCTTTATGAC  
ACATCACGTGTGCAATTAACCCATTTGTACCATTTAAGACCAATAATTAACCCCCCAACCCCCCACCACCACAAT  
ATACATACACGTCATTTCTTAACTAATCATTGACCAGCTAGCTTATTGATGTGATGATATGCATATGTATAAA  
TGCTATAGCTGGTCAAGTATGAACTCGATTGTGTACTGTTTTTATATGGAAGATCAAGGCTTCTGTGAGAATT  
TTGATAGCAGTGATTCTTCTTGTCTTTGGCAAATTTCTTAAAATCTTCTGAATGTTGGTAGTGATATACTGTT  
TTTACAATTTTCAGAACTAAATTTCTTCTTGGGTTGTTTGTCTAAATTAATAATATATAATACAGCAAGCCAAAAAT  
GAGAAATAATTGCTTGTCTCTAAGTAACCTTTCACAATATTGCCTAACTGATTAGCTGATCATATTCTATTAAC  
ATTTATGTGTTTACAGGTTGAGAATGTTAAGCAACATTGTTTCCCTAATGTTCTGAATTATTCCATGCTGGAAGA  
GAATCACTTCAGTAACGACACTGTGAATTGCTTTTGATTCTTTTATCATTAGGGCTAGAGATACCTATTATTT  
CACACAATTATAAAATTTCTATAGTCTATGGGAGCCATGTGGTGTGGTGAAGGGATTACCGGATGATGCCCTAGGTGCT  
CTGTACATGACCAAGGGTGGTGGTACTAATGTAGTAGCCGACGGTTACACCAAGGGTGTGCTGCTGCTGCTGCT  
GAAATTGTTGGTACCTCTGTGCTCGTTTACACGGTTTTCTCTGCTTCTGATGCCAAACATAGAGCCAGAGACACA  
CACATTCCTGTAAGTACTACTCTTGTCTTTGTAGGCCTATTTCTCTTGACATTATTAATTAGACTTAAGCCAATA  
TAAATCATTCTACATAATAGGTATGATTAAATGTGATTAAAGTTTGAAGAAAGATTGCTTCTATATCTGTAAGAA  
TTGGTAAATCAAAACCTGATATTATTGATCATGAAAAAGTTTGATTAAATTGGATTTCGTAATGCTATAATTCAAT  
GGTTTTCAATATTGGCCCCCTTGCCCATTAGGTTTGTCTATGTTCTTGGTGCCTTGGCTACCATCCCTATTATC  
GATACAAGTATTAACCGTGCCAGAAGTCTTGGTGCAGCAAACATCTACAATAAAGAGCAGGCATGGGATGATCAT  
GTAAGCTAAAAATTGAACTATATCTAAATACAATATAATCAGTATTCTACTATTGAAATATTTGTGATAAGGAAC  
CACTACATGTGCTGTTAACTTTTACATGTGTAAAGGTTTCGCATGGTAAACAGAAATAAATTTTTATGTTTTTCAC  
TTACCACAGCCCTCTTTTATTTATTTTTCATACAACATGAATTTTTTAAAAAAATTGACAAATGGGATGATAAG  
ATTGGCTAAAGTTTGTCTTGTCTCTCATCTTGTCTGTGATAATATGCAATGGATATTCTGGGTGTACCATATGGT  
TTTGGTGAAGAGGCGACAGGGGAAATTTGTCTGTGAATATGTCAAGTTCTTGTGAGTACATCGAAATTACC  
AGAGATTGGAGACTAGGAGTACTCCTAAAAATTTTGGCAGCTGCAGCTGAAGAGAAAGAAATACATTCATTTGAA  
ATTGACCCTGCACAAGTAGGTTAATTAGTTCTGTCAAATAATCTCCTATTTTCTTCATTTTAAATGTAGACAGC  
AGTTGTGATGATGATCTTTCATTTCAATTAATCTGGACTTTACTATGACTGGGCTTCAACATATATGTGTAATTG  
TTATTCCTTCAATGGACAATTCTAAGTGTACATAATTTGGTTTACCAAATCATTACCTACTCTCACAAGCACGT  
GGACCCCGCGTGAATAAAATAATTCCAACATGTGGTCCCCACACCCCTATTGTAAGTGTATGTAAACATTATGT  
AAAGAAAATTAGGTACATCTAGCATGGTCTTCTTCAATGTGTGTATAGTATTCTGTGCATTGTCTTGAAGCTA  
GGTCTAAAATATGTATATCCAATAGGTTTCTTTGGTTTGGATATATTTCTTCACTAAAGAATATTTAATGTGCTT  
ACTTTTCAAGAAATAATTGGAACCATCTTCTTTATGACACATCACGTGTGCAATTAACCCATTTGTACCATTTA  
AGACCAATAATTAACCCCCCAACCCCCCACCACCACAATATACATACACGTCATTTCTTAACTAATCATTTGACC  
AGCTAGCTTATTGATGTGATGATATATGCATATGTATAAATGCTATAGCTGGTCAGTATGAACTCGATTGTGTAC  
TGTTTTTTATATGGAAGATCAAGGCTTCTGTGAGAATTTTGATAGCAGTGATTCTTCTTGTCTTCTTGGCAAT  
TTCTTAAATCTTTCTGAATGTTGGTAGTGATACCTGTTTTTACAATTTTCAAGAACTAAATCTTCTTGGGTGTG  
TTGCTAAATTAATAATATATAACAGCAAGAAATAAATTTGCTTGTCTCTAAGTAACCTTACACA  
ATATTGCCCTAACTAATTAGCTGATCATATTCTATTAACATTTTATGTGTTTACAGGTTGAGAATGTTAAGCAACA  
TTGTTTTCCCTAATGTTCTGAATTATTCCATGCTGGAAGAGAATCACTTCAGTAACGACACTGTGAATTGCTTTTG  
ATTTCTTTTTTATCATTAGGGCTAGAGATACCTATTGTTTACACAATTATAAAATTTCTATAGTCCAATGGGAGCC  
ATATGTGGTGTGGTGTGGTTAAGGGATTTCGGAAGACTCTGTACATGAAGTGGTGGTGGTGGTACTAATGTA  
GTAGCCGACGGTTACACCAAGGGTGTGCTTACCTAGGTGCTGAAATTGTTGGTACCTCTGTGCTCGTTTACACGGTT  
TTCTCTGCTTCTGATGCCAAACATAGAGCCAGAGACACACACATTCTCTGTAAGTACTACTCGTCTTTGTAGGCCT  
ATTTCTCTTGACATTATTAATTAGACTTAAGCCAATATAAATCATTCTACATAATAGGTATGATTAAATGTGATT  
AAGTTTGAACAAGAATTGTCTTCTGTATCTGTAAGAATTGATAAAAACTGATATTATTGATCATGAAAAAGTTT  
GATTAATTGGATTTCGTAATACTATAATTCAATGGTTTTCAAATATTGGTCCCTTGCCCATTAGGTTTGTGTG  
TTCTTGGCGCACTTGGCTACCATCCCTATTATCGATACAGGTATTAACCGTGCCAGAAGTCTTGGTGCAGCAAC  
ATCTACAATAAAGAGCAGGCATGGGATGATCATGTAAGCTAA

>Oeu01831.2

ATGGGAGCCATATGTGGTGTGGTGTGGTTAAGGGATTTCGGAAGACCCCTGTACATGACCAAGGGTGGTGGTGGT  
ACTAATGTAGTAGCCGACGGTTACACCAAGGGTGTGCTTACCTAGGTGCTGAAATTGTTGGTGGCGACGTTGGTTCAC  
GATGGTAAGTGGCAAAAGAATCGAGGACTGCTAACTTCTTTGATGAGGAAGTACAGATAGACAGTGATGAAGAA  
GAGGAAGGCGAAAATGTTGTTGTGGATAAACTTGGGGGAAATTTTGTCTGTGAAATATGTCAAGTTCTTGTGAG  
TACATCGAAATTACCAGAGATTGGAGACTAGGAGTACTCCTAAAAATTTTGGCAGCTGCAGCTGAAGAGAAAGAA  
ATACATTCAATTTGAAATTGACCCTGCACAAGTTGAGAATGTTAAGCAACATTGTTTCCCTAATGTTCTGAATTAT  
TCCATGCTGGAAGAGAATCACTTCAGTAACGACACTGGATTTCGGAAGACCCCTGTACATGACCAAGGGTGGTGGT

GGTACTAATGTAGTAGCCGACGGTTACACCAAGGGTGATGCCCTAGGTGCTGAAATTGTTGGTACCTCTGTGCTC  
GTTTACACGGTTTTCTCTGCTTCTGATGCCAAACATAGAGCCAGAGACACACACATTCCCTAATTGGTTTGCTATG  
TTCTTGGTGCACCTTGGCTACCATCCCTATTATCGATACAAGTATTAACCGTGCCAGAAAGTCTTGGTGCAGCAAAC  
ATCTACAATAAAGAGCAGGCATGGGATGATCATGTTGAGAATGTTAAGCAACATTGTTTCCCTAATGTTCTGAAT  
TATTCCATGCTGGAAGAGAATCACTTCAGTAACGACACTGGTGGTGGTGGTACTAATGTAGTAGCCGACGGTTAC  
ACCAAGGGTGATGCCCTAGGTGCTGAAATTGTTGGTACCTCTGTGCTCGTTTACACGGTTTTCTCTGCTTCTGAT  
GCCAAACATAGAGCCAGAGACACACACATTCCCTATATTGGTCCCCCTGCCCATTAGGTTTGCTGTGTTCTTGGCG  
CACTTGGCTACCATCCCTATTATCGATACAGGTATTAACCGTGCCAGAAAGTCTTGGTGCAGCAAACATCTACAAT  
AAAGAGCAGGCATGGGATGATCATGTAAGCTAA

>Oeu018831.2

MGAICGVGVVKFGKTLYMTKGGGGTNVVADGYTKGDALGAEIVGGDVGHDKWQKNRGLLNFFDEEVQIDSDEE  
EEGENVVVDKWTGKFCSVNMSSSCEYIEITRDWRLGVLLKILAAAAEKEIHSFEIDPAQVENVKQHCFPNVLNY  
SMLEENHFSNDTGFGKTLYMTKGGGGTNVVADGYTKGDALGAEIVGTSVLVYTVFSASDAKHRARDTHIPNWFAM  
FLVHLATIPIIDTSINRARS LGAANIYNKEQAWDDHVENVKQHCFPNVLNYSMLEENHFSNDTGGGGTNVVADGY  
TKGDALGAEIVGTSVLVYTVFSASDAKHRARDTHIPILVPLPIRFVFLAHLATIPIIDTGINRARS LGAANIYN  
KEQAWDDHVS\*

## PIP2 – Plasmalemmic Intrinsic Protein type 2

### OeuPIP2;1 Oeu001271.1

>OeuPIP2;1\_Oeu001271.1 | scaffold1031:177815..179775 reverse

**ATG**ACGAAAGACGTCGAATCTCATGTGGAGCCAGCGGAGGAATACTCCGCCAAGGACTACCATGATCCGCCACCG  
GCGCCTCTCATTGATTTTGTATGAGCTGAGCAGCTGGTCGTTTTACAGAGCACTTATTGCTGAGTTCGTTGCCACT  
TTGCTGTTCCCTTTACGTCACAGTTTTGACCGTTATAGGCTACAAAAGCCAGATTGACCCAGCTCACGGCGGCGAC  
GACTGCGGCGGCGTTGGGATTCTTGGCATTGCATGGGCTTTTCGGCGGCATGATTTTCATTCTTGTCTACTGCACC  
GCCGGTATCTCTG**GT**CAGTTTTACAGTTTTACGCCAGCTTTTTCTTTGATTGGTACCTGCACCATAATAAGTAAAT  
TACTTGTGAAAATAAGTAACTTTTTTCATATTGTGACAGGAGGACATATTAACCCAGCAGTGACATTCGGGCTGTT  
CTTGGGAAGAAAGGTGTCATGATCAGAGCAGTGCTTTACATGGTAGCACAATGTTTGGGTGCAATCTGTGGTGT  
GGGATTGGTGAAAGCATTCCAAAAATCGTACTATCATAAAGTATGGTGGTGGAGCAAATGAACTTGCTCCAGGGTA  
CAACAAAGGGGTTGGTTGGGTGCTGAAATTATTGGCACCTTTGTTTTGGTCTACACCGTTTTCTCAGCCACTGA  
TCCTAAGAGGAATGCCAGAGACTCCCATGTCCCTGTAAGCACTTTTTTCTCTGCTAACGCACCCACACCCCCAA  
GTCTTATTATCCCAAGGGAGGAGTTCTCCTCGGAATAACAACCCCTTGATTGGATGTTTTAAATTTGTTTTTTGG  
GCAAAATCCAATGAAGTTTTGCCATTTGACAACCTGTAACCTCTGGCAAATTTGTTGTACATATAACATGGTT  
CATTCTCCACAGAATCATTTTTTTGCCACTAATCTGTCTACTAAAGGTGTCATAAAATCGCGTGGGGTTCATCA  
GGGTCCTAAATTAATTTGTACACGGGTCAACGGGCAATAATAAGTTCTTGACCCAAAGTCCATCAATGAACCTGA  
ATTTATAGAAAATTTTGGATTATATCCTTGCAAATATTGATTTAATCTGATACATATGAAGGCTTGGCTCCACT  
TCCCATCGGATTTGCTGTGTTTCATGGTTCACCTTGCCACCATCCCCATCACCGGAACCTGGCATCAACCCCTGCTAG  
GAGCTTTGGAGCTGCTGTCTATCTACAACGAAGACAAGCCCTGGGATGACCATGTATGCCTCCCTTTTACCTCTTT  
TTTACTGATTTTACACGCACAATAAGTTGNNNNNNNNNNNNNNNNNNNNNNNNNNNNNNNNNNNNNNNNNNNNNN  
NNNACCACCCCCCCCCCCCCCCCCCTTTTTTTTAAATTGTAATTATTTTTATAGAATTTAATGACATAATTCAT  
AAAAGCTAGTCAAGTCCCCAATTTATCTTTTAGTTTGGACAAGGGTATCTCAATTTGATACAAAAACAAGTA  
GGAGGCTCCCGAGTCAAGTTGCACCTCCACTCATTTATAAAAATATGCACGCTCATGTCTGCGCATGAGGACAT  
GTGTTCAAGACGTAATTTAACACATTCTCTCCCGTTAACACATTAAGCCCTGTTTGATAGGGATTAAAAATCAG  
ATTTATAATAGATTTTGATAAAAGTTGATGAAATGTGTACTTGAAAAGTTGTGGGTCCCTTAAATATGTTGTTA  
GAATTAATTATTAAATTTGACTTAGATTAAATCTGAATTTTAATTTTACCAAACATGGACTAAGCTTTTAAAC  
GAGTTATTAAAAACGAAGATAGTACTAATATATTTGTTAATATT**CAG**TGGATTTTTTGGGTTGGACCATTCTGTTG  
GAGCTCTAATTGCTGCAATCTACCACCAATACATCCTAAGGGCAGGAGCCATCAAGGCACTGGGTCTTTCAGGA  
GCAACGCT**TAA**

>OeuPIP2;1\_Oeu001271.1

**ATG**ACGAAAGACGTCGAATCTCATGTGGAGCCAGCGGAGGAATACTCCGCCAAGGACTACCATGATCCGCCACCG  
GCGCCTCTCATTGATTTTGTATGAGCTGAGCAGCTGGTCGTTTTACAGAGCACTTATTGCTGAGTTCGTTGCCACT  
TTGCTGTTCCCTTTACGTCACAGTTTTGACCGTTATAGGCTACAAAAGCCAGATTGACCCAGCTCACGGCGGCGAC  
GACTGCGGCGGCGTTGGGATTCTTGGCATTGCATGGGCTTTTCGGCGGCATGATTTTCATTCTTGTCTACTGCACC  
GCCGGTATCTCTGGAGGACATATTAACCCAGCAGTGACATTCGGGCTGTTCTTGGGAAGAAAGGTGTCATGATC  
AGAGCAGTGCTTTTACATGGTAGCACAAATGTTTGGGTGCAATCTGTGGTGTGGGATTGGTGAAAGCATTCAAAAA  
TCGTACTATCATAAGTATGGTGGTGGAGCAAATGAACTTGCTCCAGGGTACAACAAAGGGGTTGGTTTTGGGTGCT  
GAAATTATTGGCACCTTTGTTTTGGTCTACACCGTTTTCTCAGCCACTGATCCTAAGAGGAATGCCAGAGACTCC  
CATGTCCCTGTCTTGGCTCCACTTCCCATCGGATTTGCTGTGTTTCATGGTTCACCTTGCCACCATCCCCATCACC  
GGAAGTGGCATCAACCCCTGCTAGGAGCTTTGGAGCTGCTGTCTATCTACAACGAAGACAAGCCCTGGGATGACCAT  
TGGATTTTTTGGGTTGGACCATTCTGTTGGAGCTCTAATTGCTGCAATCTACCACCAATACATCCTAAGGGCAGGA  
GCCATCAAGGCACTGGGTTCTTTCAGGAGCAACGCT**TAA**

>OeuPIP2;1\_Oeu001271.1

MTKDVESHVPEAEYSADYHDPAPPLIDFDELSSWSFYRALIAEFVATLLFLYVTVLTVIGYKSQIDPAHGGD  
DCGGVGILGIAWAFGGMIFILVYCTAGISGGHINPAVTFGLFLGRKVSILIRAVLYMVAQCLGAICGVGLVKAFQK  
SYHKKYGGGANELAPGYNKGVLGAELIGTFVLVYTVFSATDPKRNARDSHVPVLAPLPIGFAVFMVHLATIPIT  
GTGINPARSFGAAVIYNEDKPWDDHWIFWVGPFVVALIAAIYHQYILRAGAIKALGSFRSNA\*

### OeuPIP2;2 Oeu030183.1

>OeuPIP2;2\_Oeu030183.1 | chr4:8070191..8071649 reverse

**ATG**ACGAAAGACGTTGAATCTCACGGGGAGCCGGCGGAATTCTCGGCCAAGGACTACCATGATCCACCACCGGCG  
CCGCTCATTGATTTTGAAGAGCTGAGCAGCTGGTCATTTTACAGAGCACTTATTGCTGAGTTCATTGCCACTTTA  
CTGTTCCCTCTACGTCACAGTTTTGACTGTTATTGGATACAAAAGCCAGATTGACCCCGCTCACGGCGGCGATCAG  
TGCGGCGGCGCTCGGGATTCTAGGCATTGCATGGGCTTTTCGGTGGCATGATTTTCATTCTTGTCTTACTGCACCGCC  
GGTATCTCTG**GT**CAGTTTTAAAAGTCTTTACAAGCTTTTTTCTTTATAGATTTTGTATGAGTGACTTACTGGTGAA  
ATAAGTAACTTTTTGATAATGTGACAGGAGGACACATTAACCCGGCTGTGACATTCCGGGCTGTTCTTTGGGACGAA  
AGGTGTCATGATCAGAGCAGTGATGTACATGGTAGCACAGTGTGGGTGCAATCTGTGGTGTGGGTTTGGTGA

AAGCATTCCAAAAATCTTATTACAACCTGTACGGTGGTGGAGCAAATGAGCTTGCTCCAGGTTACAACAAAGGTG  
TTGGATTGGGTGCTGAAATTATTGGCACATTTGTTTTGGTTTACTGTCTTCTCAGCCACTGATCCTAAGAGGA  
ATGCCAGAGATTCCCATGTTCCCGTAAGCAATTTTTTTCTCTTCTAACCCAAACTCTGGTAAAAATTTTTGGTTA  
TAGTCTTGAAAATATTGATTTAAATCTTACATATATGAAGGTGTTGGCTCCACTTCCCATTGGATTTGCTGTTTT  
CATGTTTACCTGGCCACCATCCCCATCACTGGAAGTGGCATCAACCCTGCTAGGAGCTTTGGAGCTGCTGTCAT  
CTACAACAAAGACAAGCCCTGGGATGACCATGTATGCTCTTTTTTACTTCTTTAGGCCCTGTTTTGACGGTCTTT  
TTTTTTTTTTTTTTGGAAAGAATGTATTTTTGAATAGTAACCTTTTTGGAGAATGCGTGATTAAAAAGTAAAAATG  
TCTTGGGTTTTATATGAATAATATTTTTATTGTGAGAATGTATGCTCGAAAATGAATATGGGGAAAAGTAGAGTAATG  
AAAGAATTACCGAAGAGGGGCTTATATAAATAATTATTTTCATGTCTTGTGTTTCACTTGTTTATGAAGGGTAGATG  
TGTGGAATATTTGATAAAAAAGATAAACGAGGTTGTGTTGAATACATAATTTAAAGAAGTTTATCTGTTGTTTAA  
CAACTTGAACCTTTTGGATAAGGTTTTTGGAGCTAACATATGTTATTACTTTTGTGTTAAATAAATATGCAGTGGAT  
TTTCTGGGTTGGGCCATTTATTGGAGCTGCCATTGCTGCATTCTACCACCAATACATTCTAAGGGCAGCAGCCAT  
TAAGGCACTGGGATCTTTTCAGGAGCAATAAT**TAA**

>OeuPIP2;2\_Oeu030183.1

**ATG**ACGAAAGACGTTGAATCTCACGGGGAGCCGGCGGAATTCTCGGCCAAGGACTACCATGATCCACCACCGGCG  
CCGCTCATTGATTTTGAAGAGCTGAGCAGCTGGTCATTTTACAGAGCACTTATTGCTGAGTTCATTGCCACTTTA  
CTGTTCCCTCTACGTCACAGTTTTGACTGTTATTGGATACAAAAGCCAGATTGACCCCGCTCACGGCGGCGATCAG  
TGCGGGCGGCGTCGGGATTCTAGGCATTGCATGGGCTTTTCGGTGGCATGATTTTCATTCTTGTTTACTGCACCGCC  
GGTATCTCTGGAGGACACATTAACCCGGCTGTGACATTCGGGCTGTTCTTGGGACGAAAGGTGTCACCTGATCAGA  
GCAGTGATGTACATGGTAGCACAGTGTGTTGGGTGCAATCTGTGGTGTGGGTTTGGTGAAAGCATTCCTCAAAATCT  
TATTACAACCTGTACGGTGGTGGAGCAAATGAGCTTGCTCCAGGTTACAACAAAGGTGTTGGATTGGGTGCTGAA  
ATTATTGGCACATTTGTTTTGGTTTACACTGTCTTCTCAGCCACTGATCCTAAGAGGAATGCCAGAGATTCCCAT  
GTTCCCGTGTGCTCCACTTCCCATTGGATTTGCTGTTTTCATGGTTCACCTGGCCACCATCCCCATCACTGGA  
ACTGGCATCAACCCTGCTAGGAGCTTTGGAGCTGCTGTCATCTACAACAAAGACAAGCCCTGGGATGACCATTTGG  
ATTTTCTGGGTTGGGCCATTTATTGGAGCTGCCATTGCTGCATTCTACCACCAATACATTCTAAGGGCAGCAGCC  
ATTAAGGCACTGGGATCTTTTCAGGAGCAATAAT**TAA**

>OeuPIP2;2\_Oeu030183.1

MTKDVESHGEPAEFSAKDYHDPAPPLIDFEELSSWSFYRALIAEFIATLLFLYVTVLTVIGYKSQIDPAHGGDQ  
CGGVGILGIAWAFGGMIFILVYCTAGISGGHINPAVTFGLFLGRKVSLIRAVMYMVAQCLGAICGVGLVKAFQKS  
YYNLYGGGANELAPGYNKGVLGAELIGTFVLVYTVFSATDPKRNARDSHVPVLAPLPIGFAVFMVHLATIPITG  
TGINPARSFGAAVIYNKDKPWDDHWIFWVGPFIGAALAAFYHQYILRAAAIKALGSFRSNN\*

## OeuPIP2;3 Oeu033842.1

>OeuPIP2;3\_Oeu033842.1 | chr12:7848155..7849789 reverse

**ATG**TAAAAGATGGTGGAGTGGCTGAGCATGGATCATTCACAGTCAAAGACTACCAGATCCACCACCGGCGCCG  
TTGATTGATGCGGCGGAGCTTACAAAGTGGTCATTTTACAGAGCTATTATAGCTGAGTTTATAGCCACCTTGCTT  
TTCCTTTACATTACGGTTTTGACTGTGATAGGGTACAAGAGCCAGACTGATACCAACGCCGCCACGGCGGTGAT  
CAGTGCGGTGGCGTTGGAGTTCTTGGTATTGCATGGGCCTTTGGTGGCATGATCTTCGTTCTTGCTACTGCACT  
GCTGGAATTTCCGGTGAGCTTTGTTTTATATAAAATTATGGATCAGAAAACAAGTTTATATATATATTGATTAA  
TGGTTTTATCATCATGTGCAGGGGGGCACATTAATCCAGCAGTGACATTCGGGCTTTTCTTGGCCCCGAAGGTGTC  
GATGATCAGAGCCATTATGTATATGGTGGCTCAGTGTGTTGGGGGCCATTTGTGGCGTCGGACTGGTGAAGGCATT  
CCAGAAAGCATATTACAAGAAGTACGGCGGCGGCGCCAATGAACTCGCAGACGGCTACAGCACCGGCGTGGGATT  
GTCGGCTGAGATCATCGGAACATTCTGTTCTTGTGTTACACAGTTTTCTCAGCCACCGATCCCAAGAGAAGTGCCAG  
GATTTCCCATGTTCTCTGTGAGTTGCACATATAAATCCCCATCTTTTTTTCTTCTGAGAAGTGCATGTTTGTT  
AAGTTATAAGGCTTACTTATAAGGAATAAGTATTTAGAAAAATTGGATCCATGAAATAACTTAAATATTTTCGAAA  
ACAAAGAAAGCACCTACTAGTGATAAGTACAAGTTAAAATTACTTTAAACTTGACTTTGTTCGACTTCAAAATTG  
ATCCTAAACTCTTTACTTGAGTTTGAGCCCGGCTAGAATTCAGTGGTTTTATCTTTATGAAACGATTTCGATATTG  
ACACTACTTGAATCTGGACTTGAATCTCAGGTTTTTGGCACCTCTCCCAATTGGATTTGCAGTTTTTCATGGTTCAC  
TTGGCAACCATCCCAATCACTGGTACTGGCATCAACCCTGCTAGAAGTTTTGGAGCTGCAGTAATCTACAACCAG  
GAAAAGGCTTGGGATGACCAGGTTAGCATTTTTTGGAAAGTAATTATGAATTAGAGTTGACTATATGAATCGTGTT  
TTGCACCATTTAATTCATTTGCTGCTAATTATACTCGAAGAGCCCTCATGCAATGATTAGTAGGATTTGTGTCA  
TAAGATGTGATTAAATTTCAAGTTCAATGTCAATATTCTACCTCAACCCTTCGGGTTTTTATCTAAACATGTGAC  
AAGATCCCTTTTTTTTTTCTTTTTTCTTTTTTCTTTTTTTTTTCTTTTTTTAAGTCTAAACATGAGACGAGCTA  
CGAAAAACATGAGTTACATCCCTGCATTTACATTGAAAAACACCTACAATCACAAGTAATAATTTATGTATAC  
TTTTGTCTCTCTCAGTGGATCTTCTGGGTAGGACCCTTCATTGGTGCAGCCATTGCAGCCTTCTACCACAGTTT  
ATTTTGAGAGCGGAGCAGCTAAAGCTCTTGGTTCATTGAGAAGCAGCTACCATGTT**TGA**

>OeuPIP2;3\_Oeu033842.1

**ATG**TAAAAGATGGTGGAGTGGCTGAGCATGGATCATTCACAGTCAAAGACTACCAGATCCACCACCGGCGCCG  
TTGATTGATGCGGCGGAGCTTACAAAGTGGTCATTTTACAGAGCTATTATAGCTGAGTTTATAGCCACCTTGCTT  
TTCCTTTACATTACGGTTTTGACTGTGATAGGGTACAAGAGCCAGACTGATACCAACGCCGCCACGGCGGTGAT  
CAGTGCGGTGGCGTTGGAGTTCTTGGTATTGCATGGGCCTTTGGTGGCATGATCTTCGTTCTTGCTACTGCACT

GCTGGAATTTCCGGGGGGCACATTAATCCAGCAGTGACATTCGGGCTTTTCTTGGCCCCGAAGGTGTCGATGATC  
AGAGCCATTATGTATATGGTGGCTCAGTGTTTGGGGGCCATTTGTGGCGTCGGACTGGTGAAGGCATTCCAGAAA  
GCATATTACAAGAAGTACGGCGGGCGGCCAATGAACTCGCAGACGGCTACAGCACCGGCGTGGGATTGTCGGCT  
GAGATCATCGGAACATTCTGTTCTTGTTTACACAGTTTTCTCAGCCACCGATCCCAAGAGAAGTGCCAGGGATTCC  
CATGTTCCCTGTTTTGGCACCTCTCCCAATTGGATTGTCAGTTTTTCATGGTTCACTTGGCAACCATCCCAATCACT  
GGTACTGGCATCAACCCTGCTAGAAGTTTTGGAGCTGCAGTAATCTACAACCAGGAAAAGGCTTGGGATGACCAG  
TGGATCTTCTGGGTAGGACCCTTCATTGGTGCAGCCATTGCAGCCTTCTACCACCAGTTTATTTTGAGAGCGGGA  
GCAGCTAAAGCTCTTGGTTCATTTCAGAAGCAGCTACCATGTT**TGA**

**>OeuPIP2;3\_Oeu033842.1**

MVKDGGVAEHGSFTVKDYHDPPLIDAAELTKWSFYRAIIAEFIATLLFLYITVLTVIGYKSQTDNAGHGGD  
QCGGVGLGIAWAFGGMIFVLVYCTAGISGGHINPAVTFGLFLARKVSMIRAIMYMVAQCLGAICGVLVKAFQK  
AYYKKYGGGANELADGYSTGVGLSAEIIIGTFVLVYTVFSATDPKRSARDSHVPVLAFLPIGFAVFMVHLATIPIT  
GTGINPARSFGAAVIYNQEKAWDDQWIFWVGPFIGAIIAFYHQFILRAGAAKALGSFRSSSYHV\*

## **OeuPIP2;4 Oeu030439.1**

**>OeuPIP2;4\_Oeu030439.1 | scaffold2530:66057..67614 forward**

**ATG**GCAAAGGACGCTGGAGTGGCGGAGCATGGATCGTTCGCGGCAAAGGACTACCAAGATCCACCACCAGCTCCG  
CTGATTGACGCGGAGGAGCTTACAAAGTGGTCATTTTACAGAGCTGTTATAGCCGAGTTTATAGCCACCTTGCTC  
TTCCTTTTACATTACGGTTTTGACTGTGATTGGGTACAAGAGCCAGATTGATACCACGGTTGGCCACGGCGGTGAT  
CAGTGCGGTGGCGTTGGAATTCCTTGGTATTGCATGGGCCTTTGGTGGAATGATCTTCGTTCTTGCTACTGCACC  
GCTGGAATTTCCGGTGAGTTTTGTTTTATACGCACACAGATACATGCATACATGTATGGTTTGATTTTAATGGCAT  
TTCTCATGTTCATGTTCATGTGCATCTCAGGGGGACACATTAATCCAGCAGTGACATTCGGGCTTTTCTTGGCCCGA  
AAGGTGTCAATGATCAGAGCCATTATGTATATGGTGGCTCAGTGTTTGGGGGCCATTTGTGGCGTCGCGCTGGTG  
AAGGCGTTACAGAAGTCACACTACAAGAAATATGGCGGCGGCGCAAATGAGCTCGCCGATGGCTACAGCACCGGC  
GTCGGATTATCCGCGGAGATAATCGGAACATTCGTCCTTGTTTACACAGTTTTCTCTGCCACTGATCCCAAGAGA  
AGTGCCAGGGATTCCCATGTCCCTGTAAGTTGACATATACAATTCCTCTATTTTTTTTTCTTTTGAGAAGTGCATGT  
TTGGTTAACTTAAAAAATTTACTTATAATTGAATAAGTATTAATAAATTTTTTTTTGGGGGTCCAAGTAGAAAAAT  
AACTTATTTAGTAGCTTTACTGACAATATTACTTAAAAAGTAATTTAATATTGACAATTTTTGCATTTGGACTTGA  
ATCTTAGGTATTGGCACCTCTTCCAATTGGATTGTCAGTTTTTCATGGTTCACTTTGGCCACCATCCCCATCACTGG  
TACTGGTATCAACCCTGCTAGGAGTTTAGGGGCTGCAGTGATCTACAACCAGGAAAAAGCTTGGGATGATCAGGT  
TAGCATTTTCCCAAAGTATTACAAATTAGATTAACTATACTCATAATGTTTTGCGCCATTTCACTCACTTTAT  
TTATTGTGAATCTTCTCGAAGATCCCGATAAATTTCAAGTTCAATTGTCAACATACCAGCTCTCGTGTTTTAT  
GAATTTTTTCGATTATGACAGCCTAGTCAAAAAGTATCGTCGAAATCATGTTGAAGAAGTGAGAAAAATTTTATAC  
TTCGCTGTCAACCCCTTTCTTTATTGCAACTTGAGACTGACTATAAAACAAAAATAGCAAAAAGTTATATTTCAAA  
AGCTCTAAACATATAGTTTTTCAATATTATTTATACCCCCACCCAAAATCACAAGTAGTAATTTATCTATTTACTT  
TCGTGTCCTTCAGTGGATCTTCTGGGTTGGACCCTTCTTTGGTGCAGCCATTGCAGCCTTCTACCACCAGTTTAT  
TTTGAGAGCAGGAGCAGCTAAAGCCCTTGGTTCATTTCAGAAGCAGCTCCCATGTT**TAA**

**>OeuPIP2;4\_Oeu030439.1**

**ATG**GCAAAGGACGCTGGAGTGGCGGAGCATGGATCGTTCGCGGCAAAGGACTACCAAGATCCACCACCAGCTCCG  
CTGATTGACGCGGAGGAGCTTACAAAGTGGTCATTTTACAGAGCTGTTATAGCCGAGTTTATAGCCACCTTGCTC  
TTCCTTTTACATTACGGTTTTGACTGTGATTGGGTACAAGAGCCAGATTGATACCACGGTTGGCCACGGCGGTGAT  
CAGTGCGGTGGCGTTGGAATTCCTTGGTATTGCATGGGCCTTTGGTGGAATGATCTTCGTTCTTGCTACTGCACC  
GCTGGAATTTCCGGGGGACACATTAATCCAGCAGTGACATTCGGGCTTTTCTTGGCCCCGAAGGTGTCAATGATC  
AGAGCCATTATGTATATGGTGGCTCAGTGTTTGGGGGCCATTTGTGGCGTCGCGCTGGTGAAGCGGTTACAGAAG  
TCACACTACAAGAAATATGGCGGCGGCGCAAATGAGCTCGCCGATGGCTACAGCACCGGCGTCGGATTATCCGCG  
GAGATAATCGGAACATTCTGCTCTTGTGTTTACACAGTTTTCTCTGCCACTGATCCCAAGAGAAGTGCCAGGGATTCC  
CATGTCCCTGTATTGGCACCTCTTCCAATTGGATTGTCAGTTTTTCATGGTTCACTTTGGCCACCATCCCCATCACT  
GGTACTGGTATCAACCCTGCTAGGAGTTTAGGGGCTGCAGTGATCTACAACCAGGAAAAAGCTTGGGATGATCAG  
TGGATCTTCTGGGTTGGACCCTTCTTTGGTGCAGCCATTGCAGCCTTCTACCACCAGTTTATTTTGAGAGCAGGA  
GCAGCTAAAGCCCTTGGTTCATTTCAGAAGCAGCTCCCATGTT**TAA**

**>OeuPIP2;4\_Oeu030439.1**

MAKDAGVAEHGSFAAKDYQDPPPLIDAEELTKWSFYRAVIAEFITLLFLYITVLTVIGYKSQIDTTVGHGGD  
QCGGVGILGIAWAFGGMIFVLVYCTAGISGGHINPAVTFGLFLARKVSMIRAIMYMVAQCLGAICGVALVKALQK  
SHYKKYGGGANELADGYSTGVGLSAEIIIGTFVLVYTVFSATDPKRSARDSHVPVLAFLPIGFAVFMVHLATIPIT  
GTGINPARSLGAAVIYNQEKAWDDQWIFWVGPFFGAAIIAFYHQFILRAGAAKALGSFRSSSHV\*



## OeuPIP2;5 Oeu027987.1

>OeuPIP2;5\_Oeu027987.1 | scaffold2335:58720..59930 reverse

**AT**GGGCAAGGACATTGAGGTTGGCGCCGAATACACCACCAAGGACTACCAAGATCCGCCACCGGCTCCGCTGATT  
GACCCGGAGGAGCTAACCAAGTGGTCGTTCTACAGGGCCATTATAGCTGAATTCATCGCCACGCTCTTGTTCCCTG  
TACATAACTGTTCTGACTGTGATTGGGTACAAGAGCGAAAGCGCCGCCGATAAAATGCGGCGGCGTCGGGATTCTT  
GGCATAGCTTGGGCTTTTGGTGGCATGATTTTTGTCCTCGTTTACTGCACTGCTGGCATTTCGG**TAAGTACCTT**  
**AATGTCTAGACTTCGACCGACTAAATTCATTTAGAGGGAGCTAGAAATTTTGTTACATGTACGAATACTCAATA**  
**TAATTC**CAATGGGTGCAGGAGGGCACATCAACCCGGCAGTGACATTAGGCCTATTCTTGCCCCGTAAGGTGTCAC  
TGGTTTCGGGCTATCATGTACATGGTGGCGCAATGTTTAGGTGCCATTTGCGGTTGCGGCTTGGTAAAGGCATTCC  
AGAAGTCTTACTATGTAAATTCGGCGGCGGTGCCAATGAACTGGCGGATGGGTACAGTAACGGCACCGGATTGG  
CGGCGGAGATCATTGGCACATTCGTCCTTGTTTACACCGTATTCTCTGCCACTGACCCCAAGAGAAATGCTAGAG  
ACTCCACGTACCT**GTAAGTGCATTTGACTCCCCTAGTTTCTTCCATTTTTTATACGGACTTGTTAAAAATCCCGG**  
**TTCGACTCGGCCGGGTATGAATGAAAGGCTGACTCTGTTGGACCCCTGTTGACACCCCTATCTAGGTCAAGAATTT**  
**GTTTCCTCTGTTCTGTTGATTAATC**CTAATTGAAATTTTTGACAGGTTTTGGCACCTCTTCCAATTGGATTGTC  
AGTGTTCATGGTTCATTTAGCCACAATCCCAATTACCGGCACGGGTATCAACCCGGCCCCGAAGTTTAGGAGCTGC  
TGTTATCTATGGCAAAGACAAGGCCTGGGATGATCAAG**TACGCATTATTTCAATGTTTTACAATTTGTACCTTAT**  
**TTCCAGGAAAAAAATTAACGTTAATTCTCATATATTTTGCAGT**GGATTTTCTGGGTGGGACCATTCAATTGGGG  
CAGCCATTGCTGCATTTTACTACCAGTATATTCTGAGGGCAGGAGCTGTAAAAGCTCTGGGATCATTCAGGAGCA  
CTGCTCAT**TGA**

>OeuPIP2;5\_Oeu027987.1

**AT**GGGCAAGGACATTGAGGTTGGCGCCGAATACACCACCAAGGACTACCAAGATCCGCCACCGGCTCCGCTGATT  
GACCCGGAGGAGCTAACCAAGTGGTCGTTCTACAGGGCCATTATAGCTGAATTCATCGCCACGCTCTTGTTCCCTG  
TACATAACTGTTCTGACTGTGATTGGGTACAAGAGCGAAAGCGCCGCCGATAAAATGCGGCGGCGTCGGGATTCTT  
GGCATAGCTTGGGCTTTTGGTGGCATGATTTTTGTCCTCGTTTACTGCACTGCTGGCATTTCGGAGGGGCACATC  
AACCCGGCAGTGACATTAGGCCTATTCTTGCCCCGTAAGGTGTCAGTGGTTCGGGCTATCATGTACATGGTGGCG  
CAATGTTTAGGTGCCATTTGCGGTTGCGGCTTGGTAAAGGCATTCCAGAAGTCTTACTATGTAAATTCGGCGGC  
GGTGCCAATGAAGTGGCGGATGGGTACAGTAACGGCACCGGATTGGCGGCGGAGATCATTGGCACATTCGTCCTT  
GTTTACACCGTATTCTCTGCCACTGACCCCAAGAGAAATGCTAGAGACTCCCACGTACCTGTTTTGGCACCTCTT  
CCAATTGGATTTGCAGTGTTCATGGTTCATTTAGCCACAATCCCAATTACCGGCACGGGTATCAACCCGGCCCCGA  
AGTTTAGGAGCTGCTGTTATCTATGGCAAAGACAAGGCCTGGGATGATCAATGGATTTTCTGGGTGGGACCATT  
ATTGGGGCAGCCATTGCTGCATTTTACTACCAGTATATTCTGAGGGCAGGAGCTGTAAAAGCTCTGGGATCATTC  
AGGAGCACTGCTCAT**TGA**

>OeuPIP2;5\_Oeu027987.1

MGKDIEVGAETTKDYQDPPAPLIDPEELTKWSFYRAIIAEFIATLLFLYITVLTIVIGYKSESAADKCGGVGIL  
GIAWAFGGMIFVLVYCTAGISGGHINPAVTLGLFLARKVSLVRAIMYMVAQCLGAICGGLVKAFQKSYVVKFGG  
GANELADGYSNGTGLAAEIIIGTFVLVYTVFSATDPKRNARDSHVPVLAPLPIGFAVFMVHLATIPITGTGINPAR  
SLGAAVIYGKDKAWDDQWIFWVGPFIGAIIAIFYQYILRAGAVKALGSFRSTAH\*

## OeuPIP2;6 Oeu017257.1

>OeuPIP2;6\_Oeu017257.1 | chr6:11700750..11703098 forward

**AT**GACAAAGGACGCAGGTGTGGCGGAGCACGGGTCGTTACGACCAAGGACTACCATGATCCGCCTCCGGCGCCG  
CTCATCGACGCGGAGGAGCTGACAAAATGGTCATTTTACAGGGCTATAATAGCTGAGTTCATAGCCACTTTGCTG  
TTTCTTTTACATTACAGTTTTGACTGTAATTGGGTACAAAAGCCAGACTGATCCCGACTTGAAGGGTGACCAGTGT  
GATGGGGTTGGAATTCCTGGTATTGCATGGGCCTTTGGTGGCATGATCTTCATTCTGGTTTACTGCACTGCTGGA  
ATTTCTGGT**CAGTTTTATTTTGTTGAGACTCGAGATTCCATCTTAAGAGTTAATTTTTTTGTTACTATTTTCATA**  
**TGTAACCATTTTGATTTACCTTTTAACATGATCAGCAAGATGGTGGCTTATGTGCCACAATTAATCTTGATATCT**  
**GACATGATAAAGTTACATGCTCAATTAATTTTTCCAATAAAAAATGGTGTAATTTGAGTGATCTGTGTGCATGCAG**  
GGGGGCACATAAACCCAGCAGTGACCTTTGGCCTGTTCTTGCCCCGAAAGTGTCTTTGATCCGGGCAGTGATGT  
ACATGGTGGCACAGTGTTTGGGAGCCATCTGCGGGCTGGGTTTGGTCAAGGCATTTCAAGAAATCATACTACAAGA  
AATACGGTGGCGGCGCCAACGTGCTGGCCGATCGGGATCAGCACCGGCGTCGGGTTAGCTGCCGAAATACATCGGAA  
CATTCGTCCTTGTTTACACTGTTTTCTCCGCCACTGATCCAAAGCGTAGTGCCAGAGATTCTCACGTCCCT**GTAA**  
**GTTTTCTATGAGCTCAATTTTTGCTCAAGTGATTAAGCCTTAGAATATTGTGAAATATGTGATTAAAAATTAATTG**  
**TTGACTTGACTTAAATCTAACTTGATATAGATTTAAATTCCTTTGAGTTTATTATAATTAGATAAGTAAAGAT**  
**GTATCTTTTTTTGCTGTCTCGATTCAAGTTCGGTAAAGATTAGTAGTAGGGGTCAGCAGGGGCAGACCTACTTGA**  
**GACCCAGCGGGTCGGCCGCCCCCACTCGATTTTCAAATTTTTAGTTTTTCTCCAAGTTTTGTAGGTTTTCAATT**  
**TTTTTCCCACGGTGTTTTGGTTTTGTCCCCACTGCACTTCCGTCTGAGTCCACCATTGAATGTGACCCATACC**  
**AAATTGCAATATGCTGTACAACGGGGCACTTGCCAGTATTATGTGGTTGTAAGTGAAATGAAGAAATTAATGTA**  
**CCAAAGGGGACTTTACCTTGGTGACAGATGCAATGAATCAAGAAAAAGTACAAGAGATATTATTGGTTTTATCTAAT**  
**TCGTTATGGACCATGAAACTTTGGATTATACCACTTTGTGAGAACGATTTTGACCGATGCAGTGAAAGAGGTATT**

GGTGACAGCAGATGATTTGACGAGAAAGTTGTTTCGTATTTTAAACAATTTAATGATAGAAAATTATATGGTATTA  
TGTC AACCTGTCAACATATCTAGCACTATAACACCATTTGTA AAAATCTTACCTTGGGGACATGGATTTCGTAGATTA  
GATAGCAATATTAGTAGAAAAC TTTTGTGGGCCCTATTAGAACTAAAAAAATTCACGCTTGTGGGGGATATCG  
TGTGATATACAACAGTAGACAATGATACATGAATTTTGCTAAACGACTCGCACCGTTTATTACACCGATGACTGC  
ACCCTCACATGATGCACGGGTCCCAATTGAATAAAAAAATGTGCGATGCCATGTGTATGTGTGTGCGGTACCTGC  
GCGGGTCGTGTAGCGTGGTTCATGATACATTAGTGGATAAAATTTTACC AAAAAAAAAATATTCTTCTATAGTGA  
TGTCCATTAATGTATTTAAATTCAACATACTAATTATGCCGAAGCCATTATTATTTGAAAATACTAGGTATTGG  
CACCTCTTCCAATTGGATTTGCAGTGTTTCATGGTTCATTTGGCCACCATTCCAGTCACCGGAACGGGCATCAACC  
CAGCTCGGAGTCTTGGAGCCGCAGTAATCTACGACCAGCACAAGGCTTGGGACGATCACGTTAGTACATATATTT  
CAAATTAAATTTAGTTACTTCTCATTAAACGTATACTATAACGAAAATTTCTGTCTTGAAAAGGTCTTTTGATGA  
CCCATAATTGGTGCTATTTAATCTAATAATTACATGTATATGTTTTTTCAGTGGATTTTCTGGGTGCGACCGTTT  
ATCGGTGCAGCCGTTGCAGCATTCTACCACCAGTTTATATTGAGAGCTGGAGCAGCAAAGGCCCTTGGTTCATTC  
AGGAGTAGTGCTTCTCATCAT**TGA**

>OeuPIP2;6\_Oeu017257.1

**ATG**ACAAAGGACGCAGGTGTGGCGGAGCACGGGTTCGTTACGACCAAGGACTACCATGATCCGCCTCCGGCGCCG  
CTCATCGACGCGGAGGAGCTGACAAAATGGTCATTTTACAGGGCTATAATAGCTGAGTTCATAGCCACTTTGCTG  
TTTCTTTTACATTACAGTTTGTACTGTAATTGGGTACAAAAGCCAGACTGATCCCGACTTGAAGGGTGACCAGTGT  
GATGGGGTTGGAATCTTGGTATTGCATGGGCCTTTGGTGGCATGATCTTCATTCTGGTTTACTGCACTGCTGGA  
ATTTCTGGGGGGCACATAAACCCAGCAGTGACCTTTGGCCTGTTCTTGGCCCGGAAAGTGTCTTTGATCCGGGCA  
GTGATGTACATGGTGGCACAGTGTTTGGGAGCCATCTGCGGCGTTGGTTTGGTCAAGGCATTTCAGAAATCATAC  
TACAAGAAATACGGTGGCGGCGCCAACGTGCTGGCCGATGGGATCAGCACCGGCGTGGGTTAGCTGCCGAAATC  
ATCGGAACATTTCGTCCTTGTTTTACTGTTTTCTCCGCCACTGATCCAAAGCGTAGTGCCAGAGATTCTCACGTC  
CCTGTATTGGCACCTCTTCCAATTGGATTTGCAGTGTTTCATGGTTCATTTGGCCACCATTCCAGTCACCGGAACG  
GGCATCAACCCAGCTCGGAGTCTTGGAGCCGCAGTAATCTACGACCAGCACAAGGCTTGGGACGATCACTGGATT  
TTCTGGGTGCGACCGTTTATCGGTGCAGCCGTTGCAGCATTCTACCACCAGTTTATATTGAGAGCTGGAGCAGCA  
AAGGCCCTTGGTTCATTTCAGGAGTAGTGCTTCTCATCAT**TGA**

>OeuPIP2;6\_Oeu017257.1

MTKDAGVAEHGSFTTKDYHDPPLIDAEELTKWSFYRAIIAEFIATLLFLYITVLTVIGYKSQTDPLKGDQC  
DVGILGIAWAFGGMIFILVYCTAGISGGHINPAVTFGLFLARKVSLIRAVMYMVAQCLGAICGVGLVKAFQKSY  
YKKYGGGANVLADGISTGVGLAAEIIIGTFVLVYTVFSATDPKRSARDSHVPVLAPLP IGFVFMVHLATIPVTGT  
GINPARSLGA AVIYDQHKAWDDHWIFWVGPFIGA AVAAFYHQFILRAGAAKALGSFRSSASHH\*

OeuPIP2;7 Oeu018111.1

>OeuPIP2;7\_Oeu018111.1 | scaffold176:1251179..1252336 forward

**ATG**TGAAGGATGTTGAGGTTCGGAGGCCCTGAATTTATTACAAAAGACTATCAAGACCCCTCCTCCAGCACCGTTG  
ATTGATCCGGAAGAACTGACTAAATGGTCATTTTATAGAGCTATCATTGCTGAATTCGTAGCTACATTACTGTTC  
TTATACATTACTGTTTTGACTGTGATTGGGTACAAGAGCCAGAGCGCCACCGATGAATGCGGCGGCGTTGGCATT  
TTGGGCATTGCTTGGGCCCTTTGGTGGCATGATTTTCGTACTTGTTTACTGCACTGCTGGTATTTCCG**GTGAGTTG**  
**CACATCTTAAATATGATTCAAATCATAAAATTGACAAAGTTTTTAACACAGATTCTCTTTCTTTGTGATGATATT**  
**TACGACGTTAATGGTGCAGGAGGGCACATTAACCCGGCAGTGACATTCGGGTGTGTTTTAGCCCCGAAAAGTTTCA**  
TTGATTCGGGCCATTATGTACATGGTGGCTCAGTGTGTAGGGGCCATTTGTGGGTGTGGATTGGTGAAGGCATTC  
CAGAGGGCTTACTACGTTAGATACGGTGGTGGCGCCAATGAACCTGGAGATGGATATAGCACAGGCACCGGATTG  
GCGGGCGAGATTATCGGCACCTTTTGTGCTTGTTTACACTGTCTTCTCCGCCACGGACCCATAAAGAAGTGCCAGA  
GACTCCCATTGTTCCG**TAATATCCGTGCTTAAGTTTTTACCAAACTCCATAATTTAGCAAGTCAAGATT**  
**TTCTTCAATCAATTTTGA**CTGTTGATTAACTACTTTGAAAATTAATCTAAAGGTATTGGCACCCTGCTTATTG  
GATTTGCTGTGTTTCATGGTTCATTTGGCTACAATTCCGATCACCGGCACTGGTATCAACCCTGCCCCGAAGTTTGTG  
GAGCTGCAGTGATCTATGGCAAGGATAAGGCCTGGGACGATCAAG**GTATTGAACATTATTTAAAAATTTGTTTATT**  
**TTATTGTTAAGTGTGTCGAGTACGGCTGCTGACTGACCCTTTTGATCGATTTTGGACAGTGGATCTTCTGGGCT**  
GGACCTTTTATTGGGGCAGCCATTGCTGCATTGTACCATCAGTACATTCTTAGAGCAGGTGCAGTTAAAGCTCTA  
GGATCATTTCAGGAGTAGTGCTTCTGCCTAT**TGA**

>OeuPIP2;7\_Oeu018111.1

**ATG**TGAAGGATGTTGAGGTTCGGAGGCCCTGAATTTATTACAAAAGACTATCAAGACCCCTCCTCCAGCACCGTTG  
ATTGATCCGGAAGAACTGACTAAATGGTCATTTTATAGAGCTATCATTGCTGAATTCGTAGCTACATTACTGTTC  
TTATACATTACTGTTTTGACTGTGATTGGGTACAAGAGCCAGAGCGCCACCGATGAATGCGGCGGCGTTGGCATT  
TTGGGCATTGCTTGGGCCCTTTGGTGGCATGATTTTCGTACTTGTTTACTGCACTGCTGGTATTTCCGGAGGGCAC  
ATTAACCCGGCAGTGACATTGGGTTGTTTTAGCCGAAAAGTTTCATTGATTTCGGGCCATTATGTACATGGTG  
GCTCAGTGTGTAGGGGCCATTTGTGGGTGTGGATTGGTGAAGGCATTTCCAGAGGGCTTACTACGTTAGATACGGT  
GGTGGCGCCAATGAACCTGGAGATGGATATAGCACAGGCACCGGATTGGCGGCCGAGATTATCGGCACCTTTTGTG  
CTTGTTTACACTGTCTTCTCCGCCACGGACCCATAAAGAAGTGCCAGAGACTCCCATGTTCCGGTATTGGCACCA  
CTGCCTATTGGATTGTGCTGTGTTTCATGGTTCATTTGGCTACAATTCCGATCACCGGCACTGGTATCAACCCTGCC  
CGAAGTTTTGGAGCTGCAGTGATCTATGGCAAGGATAAGGCCTGGGACGATCAATGGATCTTCTGGGCTGGACCT

TTCATTGGGGCAGCCATTGCTGCATTGTACCATCAGTACATTCTTAGAGCAGGTGCAGTTAAAGCTCTAGGATCA  
TTCAGGAGTAGTGCTTCTGCCTAT**TGA**  
>OeuPIP2;7\_Oeu018111.1  
MVKDVEVGGPEFITKDYQDPPPAPLIDPEELTKWSFYRAIIAEFVATLLFLYITVLTVIGYKSQSATDECGGVGI  
LGIAWAFGGMIFVLVYCTAGISGGHINPAVTFGLFLARKVSLIRAIMYMAQCVGAICGGLVKAFQRAYVYRYG  
GGANELGDGYSTGTGLAAEIIIGTFVLVYTVFSATDPKRSARDSHVPVLAPLPIGFAVFMVHLATIPITGTGINPA  
RSFGAAVIYGKDKAWDDQWIFWAGPFIGAAIAALYHQYILRAGAVKALGSFRSSASAY\*

## OeuPIP2;8 Oeu023232.1

Corrected as follow : Exon 1 extended in its 5'end with 84n

>OeuPIP2;8\_Oeu023232.1 | scaffold20321:54..1081 reverse **original version**  
**ATG**GGTGAGCTCATGCTCTGGTCCTTTTACAGAGCCATAATTGCCGAGTTCATTGCCACCCTGCTCTTCTTTAC  
GTCACCGTCGCCACCGTCATCGGCCACAAGAAGCTCAACGCCGCCGACCAATGCGATGGCGTTGGCATCCTCGGC  
ATCGCTTGGGCCTTTGGTGGCATGATCTTCATCCTTGTTTACTGCACCGCCGGCATCTCAG**GTACATGATTCACT**  
**GCCTCAACTTCTTCAAGACAAATCACCACCTTATTTCTTGAAATTTTACCGGAATTTTTTCTCTGCTGTTCTACAG**  
GTGGTCACATAAACCCGGCTGTGACTTTTCGGGTGTTCTTGGCCAGGAAGGTGTCGTTGATCCGTGCAATTATGT  
ACATGATTGCACAGTGTTTGGGTGCCGTCTGTGGAGTTGGCCTGGTGAAGGCCTTCATGAAGAGCTACTACAACC  
GCTGGGCGGGCGGCTAACGTGGTGCTCATGGGTACAATATCGGCACAGCTTTGGGTGCTGAAATTATCGGTA  
CCTTTGTTCTTGTATACACCGTCTTCTCGGCCACTGACCCCAAGAGAAGTGCACGTGACTCTCACGTCCCTGTAA  
**GTAGAAAAAATAGCTAGCTTATTTGTGGGTTTTTCTTGCTTTTTCTAAGTTGACTTATTTTTTGGATTGTTT**  
**TAGGTTTTGGCTCCTCTTCCAATTGGGTTTGCAGTTTTTCATGGTGCACCTTAGCGACCATCCCCATCACTGGAAC**  
GGTATTAACCCCTGCAAGGAGTTTTGGAGCTGCTGTGATCTACAACAATGACAAAGTCTGGGATGACCAT**GTAAAGT**  
**TGGTTTGGATAAATTACTTTCTTTTTTTTCGTTTCTTACTTTTGTGAACTTAAAGTAAAAAATTTGGATGGT**  
**TCATGCAGTGGATTTTTCTGGGTAGGACCATTTGTGGGAGCTTTGGCGGCAGCAGCATATCATCAGTACATCTTGA**  
GAGCTGCAGCTATTAAGGCAATTGGATCATTCCGCAGCAATCCCACAAAC**TAA**  
>OeuPIP2;8\_Oeu023232.1 | scaffold20321:54..1165 reverse **Corrected version**  
**ATG**TCGAAAGAAGTGACTGAAGAAGGACAAGTACACCCCATGGAAAGGACTATGAGGACCCACCGCCAGCACCA  
TTACTGGACATGGGTGAGCTCATGCTCTGGTCCTTTTACAGAGCCATAATTGCCGAGTTCATTGCCACCCTGCTC  
TTCCTTTACGTCACCGTCGCCACCGTCATCGGCCACAAGAAGCTCAACGCCGCCGACCAATGCGATGGCGTTGGC  
ATCCTCGGCATCGCTTGGGCCTTTGGTGGCATGATCTTCATCCTTGTTTACTGCACCGCCGGCATCTCAG**GTACA**  
**TGATTCACCTGCCTCAACTTCTTCAAGACAAATCACCACCTTATTTCTTGAAATTTTACCGGAATTTTTCTCTGCT**  
**GTTCTACAGGTGGTCACATAAACCCGGCTGTGACTTTTCGGGTTGTTCTTGGCCAGGAAGGTGTCGTTGATCCGTG**  
CAATTATGTACATGATTGCACAGTGTTTGGGTGCCGTCTGTGGAGTTGGCCTGGTGAAGGCCTTCATGAAGAGCT  
ACTACAACCGTCTGGGCGGGCGGCTAACGTGGTGCTCATGGGTACAATATCGGCACAGCTTTGGGTGCTGAAA  
TTATCGGTACCTTTGTTCTTGTATACACCGTCTTCTCGGCCACTGACCCCAAGAGAAGTGCACGTGACTCTCACG  
TCCCTGTAA**GTAGAAAAAATAGCTAGCTTATTTGTGGGTTTTTCTTGCTTTTTCTAAGTTGACTTATTTTTT**  
**GGATTGTTTTAGGTTTTGGCTCCTCTTCCAATTGGGTTTGCAGTTTTTCATGGTGCACCTTAGCGACCATCCCCATC**  
ACTGGAAGTGGTATTAACCCCTGCAAGGAGTTTTGGAGCTGCTGTGATCTACAACAATGACAAAGTCTGGGATGAC  
CAT**GTAAAGTTGGTTTGGATAAATTACTTTCTTTTTTTTCGTTTCTTACTTTTGTGAACTTAAAGTAAAAAAT**  
**TTGGATGGTTCATGCAGTGGATTTTTCTGGGTAGGACCATTTGTGGGAGCTTTGGCGGCAGCAGCATATCATCAGT**  
ACATCTTGAGAGCTGCAGCTATTAAGGCAATTGGATCATTCCGCAGCAATCCCACAAAC**TAA**  
>OeuPIP2;8\_Oeu023232.1  
**ATG**TCGAAAGAAGTGACTGAAGAAGGACAAGTACACCCCATGGAAAGGACTATGAGGACCCACCGCCAGCACCA  
TTACTGGACATGGGTGAGCTCATGCTCTGGTCCTTTTACAGAGCCATAATTGCCGAGTTCATTGCCACCCTGCTC  
TTCCTTTACGTCACCGTCGCCACCGTCATCGGCCACAAGAAGCTCAACGCCGCCGACCAATGCGATGGCGTTGGC  
ATCCTCGGCATCGCTTGGGCCTTTGGTGGCATGATCTTCATCCTTGTTTACTGCACCGCCGGCATCTCAGGTGGT  
CACATAAACCCGGCTGTGACTTTTCGGGTTGTTCTTGGCCAGGAAGGTGTCGTTGATCCGTGCAATTATGTACATG  
ATTGCACAGTGTTTGGGTGCCGTCTGTGGAGTTGGCCTGGTGAAGGCCTTCATGAAGAGCTACTACAACCGTCTG  
GGCGGGCGGCTAACGTGGTGCTCATGGGTACAATATCGGCACAGCTTTGGGTGCTGAAATTATCGGTACCTTT  
GTTCTTGTATACACCGTCTTCTCGGCCACTGACCCCAAGAGAAGTGCACGTGACTCTCACGTCCCTGTTTTGGCT  
CCTCTTCCAATTGGGTTTGCAGTTTTTCATGGTGCACCTTAGCGACCATCCCCATCACTGGAAGTGGTATTAACCC  
GCAAGGAGTTTTGGAGCTGCTGTGATCTACAACAATGACAAAGTCTGGGATGACCATTTGGATTTTTCTGGGTAGGA  
CCATTTGTGGGAGCTTTGGCGGCAGCAGCATATCATCAGTACATCTTGAGAGCTGCAGCTATTAAGGCAATTGGA  
TCATTCCGCAGCAATCCCACAAAC**TAA**  
>OeuPIP2;8\_Oeu023232.1  
MSKEVTEEGQVHPHGKDYEDPPPAPLLDMGELMLWSFYRAIIAEFIATLLFLYVTVATVIGHKKLNAADQCDGVG  
ILGIAWAFGGMIFILVYCTAGISGGHINPAVTFGLFLARKVSLIRAIMYMIAQCLGAVCGVGLVKAFMKSYNRL  
GGGANVSHGYNIGTALGAEIIIGTFVLVYTVFSATDPKRSARDSHVPVLAPLPIGFAVFMVHLATIPITGTGINP  
ARSFGAAVIYNNDKVDDHWIFWVGPFVGLAAAAHYHQYILRAAAIKAIGSFRSNPTN\*

## OeuPIP2;9 Oeu020106.1/scaffold870

**Observation:** Two scaffolds have been linked to generate OeuPIP2;9. The scaffold Oeu020106.1 is underlined

>Oeu020106.1 | Scaffold18654:1671..2018 forward  
>Scaffold870 | Scaffold870:312817..313578 forward

>OeuPIP2;9\_Oeu020106.1/Scaffold870

**ATG**ACGAAGGAAGTGAGTGAAGAAGGACAGGTACATCACCATGGAAAGGACTACGTGGACCCACCACCAGCACCA  
TTGCTAGACATGGGTGAGCTCAAGCTCTGGTCCTTTTACAGAGCTCTTATCGCCGAGTTCATCGCCACCCCTTCTC  
TTCCTCTACGTACCGTCGCTACCGTCATCGGCCACAAGAAGCTCAACGCGGCCGACCAATGTGATGGCGTTGGC  
ATTCTCGGTATCGCCTGGGCCTTTGGTGGCATGATCTTCATCCTCGTTTACTGTACCGCCGGCATCTCAGGTGGT  
CACATAAACCCGGCTGTGACTTTTGGTTTGTCTTGGCAAGGAAGGTATCGTTGATCCGTGCTGTTATGTACATG  
ATTGCACAGTGTTTGGGTGCCATTTGTGGAGTTGGGCTGGTGAAGGCCTTCATGAAGGGGTACTACAACCGTCTA  
GGCGGGCGGCTAACTCGGTGTCTCATGGTTACAACACAGGCACAGCTTTGGGTGCTGAAATCATCGGCACCTTT  
GTGCTTGTTTACACCGTCTTCTCCGCCACTGACCCCAAGAGAAGTGCACGTGACTCTCATGTCCCT**GTAAAGTAGA**  
**AGCAATTTCTAGCTTATTTTGTGTTTGTCTTTTCTAAAGTGAAGTTGAAGTTATTTTGGATTATTTTCAG**TTTT  
GGCTCCTTTACCAATTGGATTGTGAGTGTTCTGGTGCCTTGGCCACCATCCCTATTACTGGAAGTGGTATCAA  
CCCTGCTAGGAGTTTGGAGCTGCCGTCTTCAACAATGATAAAGTCTGGGATGACCAT**GTAAAGTTCGTCTAG**  
**TAAGTTACTTTTTTTCAAGTATATATAATTTATTTTCTTGAAGTATAAAGTATAATTTTGATGATGCATGTAGT**  
GGATTTTCTGGGTGGACATTTGTGGGAGCATTGGCAGCAGCATATCATCAGTACATCTTAAGGGCTGCAG  
CTATTAAGGCATTGGGATCATTCCGCAGCAACCCACAAAC**TAA**

>OeuPIP2;9\_Oeu020106.1/Scaffold870

**ATG**ACGAAGGAAGTGAGTGAAGAAGGACAGGTACATCACCATGGAAAGGACTACGTGGACCCACCACCAGCACCA  
TTGCTAGACATGGGTGAGCTCAAGCTCTGGTCCTTTTACAGAGCTCTTATCGCCGAGTTCATCGCCACCCCTTCTC  
TTCCTCTACGTACCGTCGCTACCGTCATCGGCCACAAGAAGCTCAACGCGGCCGACCAATGTGATGGCGTTGGC  
ATTCTCGGTATCGCCTGGGCCTTTGGTGGCATGATCTTCATCCTCGTTTACTGTACCGCCGGCATCTCAGGTGGT  
CACATAAACCCGGCTGTGACTTTTGGTTTGTCTTGGCAAGGAAGGTATCGTTGATCCGTGCTGTTATGTACATG  
ATTGCACAGTGTTTGGGTGCCATTTGTGGAGTTGGGCTGGTGAAGGCCTTCATGAAGGGGTACTACAACCGTCTA  
GGCGGGCGGCTAACTCGGTGTCTCATGGTTACAACACAGGCACAGCTTTGGGTGCTGAAATCATCGGCACCTTT  
GTGCTTGTTTACACCGTCTTCTCCGCCACTGACCCCAAGAGAAGTGCACGTGACTCTCATGTCCCTGTTTTGGCT  
CCTTTACCAATTGGATTGTGAGTGTTCTGGTGCCTTGGCCACCATCCCTATTACTGGAAGTGGTATCAACCTT  
GCTAGGAGTTTGGAGCTGCCGTCTTCAACAATGATAAAGTCTGGGATGACCATTTGGATTCTTGGGTGGA  
CCATTTGTGGGAGCATTTGGCAGCAGCATATCATCAGTACATCTTAAGGGCTGCAGCTATTAAGGCATTGGGA  
TCATTCCGCAGCAACCCACAAAC**TAA**

>OeuPIP2;9\_Oeu020106.1/Scaffold870

MTKEVSEEGQVHHHGKDYVDPPPPAPLLDMGELKLWSFYRALIAEFIATLLFLYVTVATVIGHKKLNAADQCDGVG  
ILGIAWAFGGMIFILVYCTAGISGGHINPAVTFGLFLARKVSLIRAVMYMIAQCLGAICGVGLVKAFMKGYYNRL  
GGGANSVSHGYNTGTALGAEIIGTFVLVYTVFSATDPKRSARDSHVPVLAPLPIGFAVFFVHLATIPITGTGINP  
ARSFGAAVIFNNDKVVDDHWIFVWGPFGALAAAAYHQYILRAAAIKALGSFRSNPTN\*

## OeuPIP2;10 Oeu022438.1/scaffold2530

**Observation:** corrected by elongating the 5' end with 66n, and elongated in the 3' end by linking the Scaffold Scaffold2530 (this latter is underlined)

>OeuPIP2;10\_Oeu022438.1 | scaffold19979:146..1262 reverse **original version**

**ATG**GAGCTTACAAAGTGGTCATTTTATAGAGCTGTTATAGCTGAGTTTATAGCCACCTTGCTCTTCTTTACATT  
ACGGTTTTGACTGTGATTGGGTACAAGAGCCAGAATGATACTCATTGCGGCGGCGGCGGCGTCCGAATTCTTGGT  
ATTGCATGGGCATTTGGTGGCATGATCTTCGTTCTTGTCTACTGCACTGCTGGAATCTCCG**GTGAGTCTTGTTTA**  
**TACATATACATACATACATCAGATGCATAAATGTAATGGCATATTTTCATGTTCATGTCCATCTCAG**GGGGACACAT  
TAATCCAGCAGTGACATTCGGGCTTTTCTTGGCCCGACAGGTGTCAATGATCAAAGCCATTATGTATATGGTGGC  
TCAGTGTTTGGGGGCCATTTGTGGCGTCGCGCTGGTGAAGGCGGTACAGAAGTCACACTACAAGAAATATGGCGG  
CGGCGTAAATGAGCTCTCCGATGGCTACAGCACCGGCGGCGGATTGGCAGCAGAGATCATCGGAACATTTCGTTCT  
TGTCTACACAGTTTTCTCTGCCATTTATGCCAAGAGAAAAGCCAGGGATTCCCATGTCCCT**GTAAAGTGCATATAT**  
**ACAATTTCTCCATTTTTGACCTGCTCGATAATCTACTTATAAGTACATTTAGAGCATGTGTTTTTCAATTAAACAC**  
**TTGGTAAGTGAATGCCATGCATTATGATACCATACACGTGAAACTGCAAACTTCGTGGTTCAATAATGATACCA**  
**TGCACGTTGTACTGTAAAACCATATTGTCCATGCATCATTATTACATCAATATGGAGTCCAATTTTTTTTACG**  
**ATAAGATTTGTATTGCTTGGAGTTTGAATCGAATTTGTCAAGTTAATCTTATTTTGGAGCTCGACTTAATTCAGT**  
**TCTTTTATCTATACGAAAGGAGCGAATATTGATATTTTTTGTATTTGAAGTTGAATCATAG**TTTTTGGCACCTCT  
CTCAATTGGATTGTGAGTTTTTATGGTTCACTTGGCCACTATCCCGATCACTGGTACTAGTATTATCCAGCTAG  
AAGCTTTGGACCTGCAGTGATCTACAACCAGAAAAAGGCTTGGGATGATCAGGTTAACATAGCC**TAA**

>OeuPIP2;10\_Oeu022438.1 **Corrected version**

**ATG**GAAAACCACGTTGGAGTGGCGAAGGACTACCGCGATCCACTGCCGGCCCCGCTGATTGGCTTGATGGAGCTT  
ACAAAGTGGTCATTTTATAGAGCTGTTATAGCTGAGTTTATAGCCACCTTGCTCTTCTTTTACATTACGGTTTTTG  
ACTGTGATTGGGTACAAGAGCCAGAATGATACTCATTGCGGGCGGCGGGCGTCCGAATTCCTTGGTATTGCATGG  
GCATTTGGTGGCATGATCTTCGTTCTTGTCTACTGCACTGCTGGAATCTCCG**GTGAGTCTTGT**TATACATATAC  
**ATACATACATCAGATGCATAAATGTAATGGCATATTTTCATGTCATGTCCATCTCAG**GGGGACACATTAATCCAGC  
AGTGACATTCCGGGCTTTTCTTGGCCCGACAGGTGTCAATGATCAAAGCCATTATGTATATGGTGGCTCAGTGTTT  
GGGGGCCATTTGTGGCGTCGCGCTGGTGAAGGCGGTACAGAAGTCACACTACAAGAAATATGGCGGCGGCGTAAA  
TGAGCTCTCCGATGGCTACAGCACCGGCGGCGGATTGGCAGCAGAGATCATCGGAACATTCGTTCTTGTCTACAC  
AGTTTTCTCTGCCATTTATGCCAAGAGAAAAGCCAGGGATTCCCATGTCCCT**GTAAGTGCATATATACAATTCTC**  
**CATTTTTGACCTGCTCGATAATCTACTTATAAGTACATTTAGAGCATGTGTTTTCAATTAAACACTTGGTAAGT**  
**GAATGCCATGCATTATGATACCATACACGTGAAACTGCAAACTTCGTGGTTCAATAATGATACCATGCACGTTG**  
**TACTGTAAACCATATTGTCCATGCATCATTATTACATCAATATGGAGTTCCAATTTTTTTTACGATAAGATTT**  
**GTATTGCTTGAGTTTGAAATCGAAGTTGTACAGTTAATCTTATTTTGAGCTCGACTTAATTCAGTTCTTTTATC**  
**TATACGAAAGGAGCGAATATTGATATTTTTTGTATTTGAACCTGAATCATAG**GTTTTGGCACCTCTCTCAATTGG  
ATTTGCAGTTTTTATGGTTCACTTGGCCACTATCCCAGTCACTGGTACTAGTATTAATCCAGCTAGAAGCTTTGG  
ACCTGCAGTGATCTACAACCAGAAAAAGGCTTGGGATGATCAG**GTTAACATAGCCTAAAAAGATT**TATAACGAAC  
**TAAGGGTGCTTTGGTTTGTCTATTTTCAGTTTTGCAAAATACTGAAAACGTGTTGATCTGTTATTTAGAAAA**  
**GCAGTTTTTGAAAAATAGCCGTTTGGTATCCATTTTTTCAAATGAATTTTTCTCTTTTTCTTTTCAACCAC**  
**ATTTTTTAATATAAATATTACACATATATCAAAAACCTCTCCTTATTTTTCAACTACACATTTTCATCAATT**  
**TACTATTCAAAAATGCATTTTACATAAAAAATATCTCCCAACGCCCTCTAAATTTATAATAAAAAACAGTTAT**  
**ATATATAGAATAATTTTATGGAATAAATGTCATACAATAAATTTTCAAAATTTTAAACCAAAACACGTTTTCTAA**  
**TTTTTTGTTTTGAGATTTTTTTTTTTTAAATGACAAATCAAACGAGTTTTTACCAATATTGAATAGATCGTCAAA**  
**ACAGAGACCTAAAATGAACTCAAATTGAAAATTGAAACATAAACCAACAGACCTAAATCTTACGATGAAATTTG**  
**GATCTACAACCTGAATATTTTTTCTCTCCTCTATTCAATTCATTGTTGATGCTATTGGGGTGCCAAATGAAAGA**  
**TGTTAGTAAGACTAAAGTCTTACTAAAGTCAGGGAGAATATTTTATTTCAATTACTCCTAATTATTTATCCGACA**  
**AGAAGAATGATTTTTTAAACGCCACACTAGTTAACTAAAAGTTACATGGATCCCTTTCTATAAGTACTTTGTTC**  
**TTTATTGCCGAAATAGTCCTAATGAAATGCCTAGTAGGATTCAATTTATAAAATATGAGAAAAATTAATATGCGTT**  
**TAATAATAACCTAGCTCAATCTTTATGATCCTTAATATATATGAACTCGAGATTGAGTATGGAAAAATATTTAT**  
**ATCCCAACACTAGTTGGAACGACTATGAACAAAATACAATATGAGTACCATTCTTTTAGTCATAAAATTTATAA**  
**ATCCCTGTTTGGTTCTTATTTCTTCTATTAATAATGAAAAATATGATAGTTATTCATCATATCAAGTACCCAA**  
**TTTGAATTTATATTTCTTGTGTGGGGTCCGTAAACGACTATATTTTTTCATTCTCATTCTCCCAAAAATGAGAAACA**  
**AACGGGGGCTAATTTTAAACATTATCTACCCACCAGCCACAAAGTGATAATTTATTTGCTTATTTTTGTCTCTT**  
**AATTCAGTGATATTCTGGGTAGGACCCTTCATTGGTGCAGCCATGGCAGCCTTGTACCACCAGTGTATTTTGA**  
**GAGCTAAAGCCTTTCGTTTCATATAGAAGCAGCTCCCGTATT****TAA**

>OeuPIP2;10\_Oeu022438.1/Scaffold2530

**ATG**GAAAACCACGTTGGAGTGGCGAAGGACTACCGCGATCCACTGCCGGCCCCGCTGATTGGCTTGATGGAGCTT  
ACAAAGTGGTCATTTTATAGAGCTGTTATAGCTGAGTTTATAGCCACCTTGCTCTTCTTTTACATTACGGTTTTTG  
ACTGTGATTGGGTACAAGAGCCAGAATGATACTCATTGCGGGCGGCGGGCGTCCGAATTCCTTGGTATTGCATGG  
GCATTTGGTGGCATGATCTTCGTTCTTGTCTACTGCACTGCTGGAATCTCCGGGGGACACATTAATCCAGCAGTG  
ACATTCGGGCTTTTCTTGGCCCGACAGGTGTCAATGATCAAAGCCATTATGTATATGGTGGCTCAGTGTTGGGG  
GCCATTTGTGGCGTCGCGCTGGTGAAGGCGGTACAGAAGTCACACTACAAGAAATATGGCGGCGGCGTAAATGAG  
CTCTCCGATGGCTACAGCACCGGCGGCGGATTGGCAGCAGAGATCATCGGAACATTCGTTCTTGTCTACACAGTT  
TTCTCTGCCATTTATGCCAAGAGAAAAGCCAGGGATTCCCATGTCCCTGTTTTGGCACCTCTCTCAATTGGATTT  
GCAGTTTTTATGGTTCACTTGGCCACTATCCCGATCACTGGTACTAGTATTAATCCAGCTAGAAGCTTTGGACCT  
GCAGTGATCTACAACCAGAAAAAGGCTTGGGATGATCAGTGGATATTCTGGGTAGGACCCTTCATTGGTGCAGCC  
ATGGCAGCCTTGTACCACCAGTGTATTTTGGAGAGCTAAAGCCTTTCGTTTCATATAGAAGCAGCTCCCGTATT**TAA**

>OeuPIP2;10\_Oeu022438.1/Scaffold2530

MENHVGVAKDYPDPLPAPLIGLMELTKWSFYRAVIAEFIATLLFLYITVLTIVIGYKSQNDTHCGGGGVGILGIAW  
AFGGMIFVLVYCTAGISGGHINPAVTFGLFLARQVSMIKAIMYMVAQCLGAICGVALVKAVQKSHYKKGGGVNE  
LSDGYSTGGGLAAEIIIGTFVLVYTVFSAIYAKRKARDSHVPVLAPLSIGFAVFMVHLATIPITGTSINPARSFGP  
AVIYNQKKAWDQWIFWVGPFIGAAMAALYHQILRAKAFRSYRSSRI\*

## OeuPIP2;11 Oeu017254.1/Oeu017256.1

>Oeu017254.1 | chr6:11625929..11647223 forward

### Observation:

5' end extended with 36n,  
3' located 21268n after TAA  
Intron 2 truncated for the analysis // (19421n)  
PIP2 sequence considered as pseudogene but kept for the *in silico*  
analysis with its hotologous OleurPIP2;11.

### >OeuPIP2;11\_Oeu017254.1/Oeu017256.1 corrected version

ATGAAGGACGTAGGGGTGGCGAATCACGAGTCGTTTCATGGCCAAGGACTACCATGATCCACCGCCGGCGCCGCTC  
ATCGACACAGAGGAGCTGACGAAGTGGTCGTTTTACAGAGCTTTAATAGCTGAGTTCATAGCCACTTTACTATTT  
CTTTACATTACAGTTTTGACTGTAATTGGGTATAAGAGCCATCTTGATACTGACTTGAAGGGTGACCAGTGTGGT  
GGTGTGCGAATTCTTGGTATTGCATGGGCCTTTGGAGGCATGATCTTCATTCTTGCTCTACTGCACTGCTGGAATT  
TCTGGTTAGTTTTCTTTCTTTACATTGAGCATCAAGATTCTATCTTAAAACGTCAACATTATAATTAAGAAGAT  
TAGGTGAATGTTTGGTATTGATTTTTCTACTCCAAAAATCAATTTTTTGATCGTTATTTCACTATTCAAGCTGTC  
ATTTTTTACTTCCACTCTCACGGGTAGGACCCACTTTTTTTTTCCGACGGTCAAAAAATCAATTTTCAAAATCACT  
ACCAAACAAGCCCTAGATCAATCTCTTGGTTCTTATTTTTATATGTTAAGTGACGTGAGATTATTGTCAACATA  
TTTCGTGCAATTGTTGGAATTTGAATGCTCCTTTAAGCTTTAAATAGATCGAATTATTCACATGAACCTCTTGTGC  
TTGTATATTAAATCCATGTTTCGACAATCAATAAGAAAACCTCATTTTTTTCTCGAGCTCATTTTCAACAAAATAAT  
TTGTACGTAAATTCTTAACTTTTTTTCATACTTTTTTAACCAGTAATCACAAAATCTCAAAAAAATCAGTATTTTCG  
AAACTCATTTTTCTGAAAAGCTCAGTTTAATGATTGCCAAACAGGTAGCCTAAAGGATCAAATAACTCTGTGAGC  
ATGTTGGGGTTTGGAAAAATCTTGGGGTTTCATTTTAAAATCTTTACTTTGTTAGAGTAGTATCACAATTTTTTAA  
TAAAGTGATTAACGCCATCATCATATTTAACTGAACATTTAGAACAAGAATAAAAATTCCTCTAAACATGCAGAT  
GCTTAATTTGTTCCAAAAATAGTGTAATTTGAGTGATCTGTGTGCATGCAGGGGGGCATATAAACCAGCAGT  
GACTTTTGGCCTGTTTTTGGCCCGAAAAGTGTCTTTGATCCGGGCAGTAATGTACATGGTGGCACAATGTTTGGG  
GGCCATTTGCGGTGTGCGGTTTGGTCAAATCCTTTCAAAAATCATACTACAGGAAATACGGCGGTGGCTCCAATGA  
GCTGGCAGAAGGGTACAGCACCAGCGTCGGGCTATCTGTGAATGTAAGTATTATGCCCTAGGTCCAATCGACTT  
TGAACATAAAATACTTTTATATAATTAAATGCAATTAAATGGCAGATCTATTATTTAATTAATAGACAATTAAAT  
AAATAATAGAGTCCGTAGATTCAAATATTTGTAATTTATTAATCACAAGGAGTTGTGATTGTGAGATACAAATTA  
CATCTGATTGAATCTTAAATTTATCCGTGGTCTGAAGTAATAACGAGATACGGATATCGTTATTACGGATAGACCA  
CACGCTGTGGCATTCTTACTTTGTGAAGTAAGTAGTATGATCTCACAAAGTTAAAGTGTTGGAACACTTAAGTGAAC  
ACGTGGATGTTTGTATAGAACAAAACATTGGAGACCCGTCGAGAGAATCCACATGGATACTATCTGAGTGTCG  
GTGGTTAATCTCTAACGTTTCGGTAGTGAAATTGGTCCTTTGACTTGAGGTCGTTCATGGTACCTTATATGAGGACA  
GTCATACTTTGGCGGTGTTGGATGTTGCTCTGAAAAGGGCCGCTAATACGACATCGTTCGGGTACGTCAAGAATC  
GTATGAAGGTTGTGATTGATCAATAAAGGATTCGTCCTCTTAGATAGTAGGAGATTATGATCTGTGTTTCAT  
CCAATTAAGTCAATGATCAAATCCTTGGCCAAGGTGTACTCATAAGTCGAAAAGGAGTTTTCGATTATATTGAC  
TTAATAGTGGAGTGAAAGATATGATTGATGATCGAGATTGACACAACCTCCATATCTCGTAATTGATCGGATCATA  
TAAATAAACAAAATTTAACTTATTTTTCTTCTATAATACTACATAgataaaaaatatttgtacaaaatcttggtga  
taaaatggtgtactcactctcacaaaattagcggactccacatgaatttaaaaaatgtcgacttataatctccac  
acctattgtgagtagtgagtTTGTACATGTAGCATGATCCATACTACTCAGACTAATCATGCCATCAACTATTTG  
TTGTACATAGGTTTGTAGTACCCTACGAATTTTGTAGTCTAGAAATTTTAAACGTATGAAACAAAACACATTATTACA  
ACCAAATTTGAGTTTTGAATTTGTATTTTTTATTTTTTCATAACGTTAGACTCAAGAAGACTCTTTGACGTTTG  
CATTACTCAAGCTTTTAAACATGGGTTGAAATGCTAGATCATCGGAACATTTCGTCTTGTTTACACTGTTTTCTC  
CGCCACTGATCCAAAGCGTAGTGCCAGAGATTCTCACGTCGATTGGCACCTCTTCCAATTGGATTTCAGATTTT  
CATGATTCATTTGGCCACTATTCCAATCACTGGAACCTGGCATTAAACCCGGCAAGGAGCCTTGGAGCTGCAGTAAT  
CTACAACCAAGACAAGGCTTGGGATGATCTTGTAGTATCTATATTCTTAATTATATTTAATTATATCCATTTAA  
ATATACTATAACATAGAAATTTGATTTTTTAACGATAAAAACCTTGCTCGAAAAGTCTCTTGATGACCTATGTTT  
GGTCAATCGAACAATGACTTCTCATGGAAAATATTTTCATTGTAAAAATTTGAATTTTCTAGTTTGCAATTTTCT  
AATACTTGCAATTATATGTTTTCCAGTGGATTTTCTGGGTTGGTCCCTTTATTGGTGCAGCCATTGCAGCATTTCTA  
CCACCAGTTTATATTGAGAGCTGGGGCAGTGAAAGCCCTTGGTTCAATTCAGGAGTAGTGCTTCTCATGTTTAA

### >OeuPIP2;11\_Oeu017254.1/Oeu017256.1

ATGAAGGACGTAGGGGTGGCGAATCACGAGTCGTTTCATGGCCAAGGACTACCATGATCCACCGCCGGCGCCGCTC  
ATCGACACAGAGGAGCTGACGAAGTGGTCGTTTTACAGAGCTTTAATAGCTGAGTTCATAGCCACTTTACTATTT  
CTTTACATTACAGTTTTGACTGTAATTGGGTATAAGAGCCATCTTGATACTGACTTGAAGGGTGACCAGTGTGGT  
GGTGTGCGAATTCTTGGTATTGCATGGGCCTTTGGAGGCATGATCTTCATTCTTGCTCTACTGCACTGCTGGAATT  
TCTGGGGGGCATATAAAACCCAGCAGTGACTTTTTGGCCTGTTTTTGGCCCGAAAAGTGTCTTTGATCCGGGCAGTA  
ATGTACATGGTGGCACAATGTTTGGGGGCCATTTGCGGTGTGCGGTTTGGTCAAATCCTTTCAAAAATCATACTAC  
AGGAAATACGGCGGTGGCTCCAATGAGCTGGCAGAAGGGTACAGCACCAGCGTCGGGCTATCTATCATCGGAACA  
TTCGTCCTTGTTTACACTGTTTTCTCCGCCACTGATCCAAAGCGTAGTGCCAGAGATTCTCACGTCGTATTGGCA  
CCTCTTCCAATTGGATTTGCAGTTTTTCATGATTCATTTGGCCACTATTCCAATCACTGGAACCTGGCATTAAACCCG

```
GCAAGGAGCCTTGGAGCTGCAGTAATCTACAACCAAGACAAGGCTTGGGATGATCTTTGGATTTTCTGGGTGGT
CCCTTTATTGGTGCAGCCATTGCAGCATTCTACCACCAGTTTATATTGAGAGCTGGGGCAGTGAAAGCCCTTGGT
TCATTCAAGGAGTAGTGCTTCTCATGTTTAA
>OeuPIP2;11_Oeu017254.1/Oeu017256.1
MKDVGVANHESFMAKDYHDPAPPLIDTEELTKWSFYRALIAEFIATLLFLYITVLTVIGYKSHLDTDLKGDQCG
GVRILGIAWAFGGMIFILVYCTAGISGGHINPAVTFGLFLARKVSLIRAVMYMVAQCLGAICGVLVKSFFQKSY
RKYGGGSNELAEGYSTSVGLSIIIGTFVLVYTVFSATDPKRSARDSHVVLAPLPIGFAVFMHILATIPITGTGINP
ARSLGAAVIYNQDKAWDDLWIFWVGPFIGAAIAAFYHQFILRAGAVKALGSFRSSASHV*
```

## OeuPIP2-related, considered as Pseudogenes

### Oeu059136.1 OeuPIP2-related

```
>Oeu059136.1 | chr10:15785080..15785518 reverse
Incomplete sequence
```

```
>Oeu059136.1
ATGGTTCACCTTGTGACCATCCCCATTACTGGAAGTAGCATCAAACCTACTAGGAGCTTTGGAGCTGCTATAATC
TACAACAAAGACAATCTCTGTGATGACCATATATGTCGACTTTTGCCTCTTTATATACATAATTAGTTCAAGTCT
TATCTTCACCTGTTTATGAAATTTAGACATGTGGAATATTTGATATAAAAAAATAAACAAGGGTTTTTAAAT
AATAATTTAAATAATTTTATCAGCCATGTAATCGGTTCAACTTTTAAAAAGGGTTATTGAGACTAATATTTTTC
CCACTTTTGTGTTTAAATAAATATGCAATGGATTCTCTAGGTTGGACCATTCATTGGAGTTGCTATTGTTGCATTCT
ACCACCAATACATTCTAAATAGCAACCATTAAGGCATTGGGATCTTTCAGGAGCAATGCATAA
>Oeu059136.1
ATGGTTCACCTTGTGACCATCCCCATTACTGGAAGTAGCATCAAACCTACTAGGAGCTTTGGAGCTGCTATAATC
TACAACAAAGACAATCTCTGTGATGACCATATATGTGCAACCATTAAGGCATTGGGATCTTTCAGGAGCAATGCA
TAA
>Oeu059136.1
MVHLVTIPITGTSIKPTRSFGAAIIYNKDNLCDDHICATIKALGSFRSNA*
```

## TIP – Tonoplastic Intrinsic Protein

### OeuTIP1;1 Oeu058531.1

>OeuTIP1;1\_Oeu058531.1 | chr22:3077808..3078742 forward

**ATG**CCTATTTCAAGAGTCGCTATTGGATCTCCGGCGGAGTTCAAGCAACTGGATGCCATCAAGGCTGCCGTGGCT  
GAGTTCATTTCCATGTTGATTTTTGTTTTGCTGGTCAAGGCTCTGGCATGGCTTTTCG**TAAGTAGTTCCTGCTGA**  
**ACAACTCATT**TTAAAGTTTTTAAGTTGTTAGAAATCGATAATTACATCATTGGTTTTTTATTTTTTCACTTTTTC  
**AACAGCTAAGCTT**ACGGACAATGAATCAACAACGCCGGCTGGCCTCATTGCTGCATCGATAGCACATGCTTTTGC  
GCTTTTTGTGGCGGTTTTCGGTGCGTGCCAACATCTCCGGCGGCCACGTAAACCCTGCTGTACCTTAGGTGCATT  
TGTTGGTGGTCACATCACATTGTTTAGAAGCATCATGTACTGGATTGCCCAATTGCTTGGATCTGTTATTGCATG  
CTTGCTTCTTAAGTTTGCCACTGGTGGACTC**TAAGTTGAATCTTATATACTCTGTCCAGTTGAGTCCATTACTG**  
**TAACATATTGGCTAATGTTCAATCCTTGATTGTAG**AAACATCAGCCTTTGCACCTTTCATCGGGAGTGACAGTTT  
GGAATGCAGTCATTTTCGAGATAGTGATGACCTTTGGACTTGTTTACACAGTTTATGCCACTGCAGTGGAATCCAA  
AGAAGGGTAATTTAGGGATCATTGCTCCATTGCCATTGGCTTCATTGTTGGTGCCAACATCTTAGCCGGTGCGC  
CATTCGATGGTGCATCCATGAACCCAGCCGTGTCTTTTGGCCCTGCTGTGCTCAGCTGGACATGGGACAGCCACT  
GGGTCTACTGGCTCGGCCCATTTGTCGGTGTGGAATTGCTGCTCTGGTCTATGAAATCTTGTTCAATTAACCAGA  
GCCATCAACAGCTCCCTACCAGTGCAGAATAC**TAA**

>OeuTIP1;1\_Oeu058531.1

**ATG**CCTATTTCAAGAGTCGCTATTGGATCTCCGGCGGAGTTCAAGCAACTGGATGCCATCAAGGCTGCCGTGGCT  
GAGTTCATTTCCATGTTGATTTTTGTTTTGCTGGTCAAGGCTCTGGCATGGCTTTTCGCTAAGCTTACGGACAAT  
GAATCAACAACGCCGGCTGGCCTCATTGCTGCATCGATAGCACATGCTTTTGCCTTTTTGTGGCGGTTTCGGTC  
GGTGCCAACATCTCCGGCGGCCACGTAAACCCTGCTGTACCTTAGGTGCATTTGTTGGTGGTCACATCACATTG  
TTTAGAAGCATCATGTACTGGATTGCCCAATTGCTTGGATCTGTTATTGCATGCTTGCTTCTTAAGTTGCCACT  
GTTGGACTCGAAACATCAGCCTTTGCACCTTTCATCGGGAGTGACAGTTTGAATGCAGTCATTTTCGAGATAGTG  
ATGACCTTTGGACTTGTTTACACAGTTTATGCCACTGCAGTGGATCCAAAGAAGGGTAATTTAGGGATCATTGCT  
CCCATTGCCATTGGCTTCATTGTTGGTGCCAACATCTTAGCCGGTGCGCATTCGATGGTGCATCCATGAACCCA  
GCCGTGTCTTTTGGCCCTGCTGTGCTCAGCTGGACATGGGACAGCCACTGGGTCTACTGGCTCGGCCCATTTGTC  
GGTGTGGAATTGCTGCTCTGGTCTATGAAATCTTGTTCAATTAACCAGAGCCATCAACAGCTCCCTACCAGTGCA  
GAATAC**TAA**

>OeuTIP1;1\_Oeu058531.1

MPISRVAIGSPAEFSQLDAIKAAVAEFISMLIFVFAGQSGMAFAKLTDNESTTPAGLIAASIAHAFALFVAVSV  
GANISGGHVNPAVTLGAFVGGHITLFRSIMYWIAQLLGSVIACLKLFATGGLETSALFSSGVTVWNAVIFEIV  
MTFGLVYTVYATAVDPKKGNLGI IAPIAIGFIVGANILAGGAFD GASMNPVSVFGPAVVSWTWD SHWVYWLGPV  
GAGIAALVYEILFINQSHQQLPTS AEY\*

### OeuTIP1;2 Oeu041014.1

>OeuTIP1;2\_Oeu041014.1 | chr20:11814751..11816218 reverse

**ATG**CCTTTCTCAAGAATTTCCGTCGGAAGTCCGGCGGAGGCCAGCCATCCAGATACCCTGAAAGCCGCCTTAGCC  
GAATTCATTTCAATGGTAATTTTTGTATTTGCCGGTGAAGGCTCTGGCATGGCTTTTG**TAAGTACTTGTGCCCT**  
**CATATTAGTTTACAATTGTTCTTCCTTGACAAAATTATTTGCTTACTTCCTTGACAAAATGACACTTGGTATTC**  
**AATCATTAGACTGTTTAAAAAACAGTTAGTTTTTACCCAATCATCTGCTGCCAACGTTGTATCTATTAAGTAGG**  
**TGGGCGGAAAATTATGTACAAATGGCTCAATCCTAAGTTCTAAACACTTGTCCTTTATTCTATTCAATCTCATAT**  
**ATAATCATT**TTTTTCTACAGCCAAGCTTACAGACGGTGGATCGAGCACGCCGGCTGGCCTTATTGCTGCGGCGATA  
GCCCATGCTTTTCGCACTTTTTGTGGCAGTCTCGGTTGCTGCCAACATTTCCGGTGGTCATGTAAACCCTGCAGTC  
ACCTTTGGTGCCTTTGTTGGTGGTCACCTATCATTGTTTAAAACTATTTTGTATTGGATTGCCCAATTGCTTGGA  
GCTATTGTTGCATGCTTGCTCCTAAAGTTCTCCACCGGTGGCTTG**TAAGTAATTAATTCCTCAAAGCTATATTA**  
**TTACACATAAAAGTTCTTCTTCATCATT**TTTTCTGAAATGTCGAAGAAGAACGAATGATGCGATTTCATTAGAATT  
**CTTGAAAAAATAAGGAAAATTCAAATTAATCTCTTCTACAGGAAACAAAAATAAAAGCAAAAGACTATACCAA**  
**CGGACCTT**AGAATCCCTGGCCTAGAGCATGTTTGGCTGGCTAAGCTTCAAAGAAGTAAAGTTAATTTCTTT  
**TCAAACATGTTAATAGAACTTATTTTCTTAAATTTAAGTAAAGAATTATTTATTTAAAAAGAAAATTTTACGCA**  
**TAAGAACCTTCCATGTTTTCAATCTCCAAGAATAAAAAATTGTCCATTACAGAACTTACTTATTTCCATGCTTTT**  
**GTGTTTGACCTGAACCAAATTTTGTCTTGTTACATCGTGCAG**AAACTTCCGCATTGCACTTTCACCCGGGGT  
ATCGTCGTGGAATGCCCTTGTTTTCGAAATAGTGATGACGTTTGGCCTGGTTTACACAGTTTATGCCACAGCAGT  
AGATCCAAAGAGGGGTGATATAGGTATCAGCCCTATTGCCATTGGCTTTCATTGTGGGTGCCAACATTTTGGC  
TGGCGGTGCCTTCGACGGTGCATCCATGAACCCAGCCGTGTGCTTCCGCCCTGCAGTCGTCAGCTGGACATGGGA  
CAGCCACTGGGTGTACTGGCTTGGCCCATTTGTTGGTGTGGAATTGCTGCTATTGTCTATGAAATCGTCTTCAT  
TAACCAGACCACTCATGAACCACTCCCTCCAGTGAGTAC**TAA**



>OeuTIP1;2\_Oeu041014.1

**ATG**CCTTTCTCAAGAATTTTCGGTCGGAAGTCCGGCGGAGGCCAGCCATCCAGATACCCTGAAAGCCGCCTTAGCC  
GAATTCATTTCAATGGTAATTTTTGTATTTGCCGGTGAAGGCTCTGGCATGGCTTTTGCCAAGCTTACAGACGGT  
GGATCGAGCACGCCGGCTGGCCTTATTGCTGCGGCGATAGCCCATGCTTTCGCACTTTTTGTGGCAGTCTCGGTT  
GCTGCCAACATTTCCGGTGGTCATGTAAACCCTGCAGTCACCTTTGGTGCCTTTGTTGGTGGTCACCTATCATTG  
TTTAAAACTATTTTGTATTGGATTGCCCAATTGCTTGGAGCTATTGTTGCATGCTTGCTCCTAAAGTTCTCCACC  
GGTGGCTTGGAACTTCCGCATTTGCACTTTCAACCGGGGTATCGTCGTGGAATGCCCTTGTTTTCGAAATAGTG  
ATGACGTTTTGGCCTGGTTTTACACAGTTTATGCCACAGCAGTAGATCCAAAGAGGGGTGATATAGGTATCATAGCC  
CCTATTGCCATTGGCTTCATTGTGGGTGCCAACATTTTGGCTGGCGGTGCCTTCGACGGTGCATCCATGAACCCA  
GCCGTGTCGTTCCGGCCCTGCAGTCGTGAGCTGGACATGGGACAGCCACTGGGTGTAAGTGGCTTGGCCCATTTGTT  
GGTGTGGAATTGCTGCTATTGTCTATGAAATCGTCTTCATTAACCAGACCACTCATGAACCACTCCCTCCAGT  
GAGTAC**TAA**

>OeuTIP1;2\_Oeu041014.1

MPFSRISVGSPEASHPDTLKAALAEFISMVIFVFAGEGSGMAFAKLTDGGSSTPAGLIAAAIAHAFALFVAVSV  
AANISGGHVNPAVTFGAFVGGHLSLFKTIWIAQLLGAIVACLLLFSTGGLETSALFSTGVSSWNALVFEIV  
MTFGLVYTVYATAVDPKRGDIGIIAPIAIGFIVGANILAGGAFDASMNPVSVFPAVVSWTWDHSHVYWLGPV  
GAGIAAIVYEIVFINQTTHEPLPSSEY\*

OeuTIP1;3 Oeu035479.1

>OeuTIP1;3\_Oeu035479.1 | Scaffold3011:24603..25462 forward

**ATG**TCTAGCGAGTTCTTTAACGTGCCACTCCGACGGGTGCTTTTGACATCGAGATGAGTTCCGCCAGCCCGGT  
GCTATCAAGGCGGCGCTAGCCGAGTTCTTCAGTACCCTGATTTTTGTGTTTGCTGGTGAGGGTTCCGGCATGGCT  
TACAACAAATTGACTGGGAATGCTCCTACCTCCCCATCCGGCCTTGTTGGCGGCAGCGGTGGCTCATGGTTTTGCT  
TTGTTTGTAGCTGTTGCCGTCAGTGCTAACATTTCCGGCGGTATGTAAACCCTGCCGTCACCTTTGGTTTGT  
CTTGGTGGAAACGTCTCTCTCTTCCGTGGTATCCTTTATATAATTGCTCAGCTGCTGGGCTCTGTGCTGCTTGC  
CTTCTCCTCTTGTCTCAACTGGTGGACTG**GTAAGTTTTAGAAATAAACAAATTCCTTGGTCCCTCCCAAACAATAA**  
**CAGCGGCTCCTAATTTATTGAATGAACTTCGATGCAGGAAACATCTGCATTTGCTTTAACTGCCGGCGGTGTCGG**  
TGTGGAACGCCTTTGTTTTCGAGATTGTAATGACCTTTGGCCTGGTTTACACTGTGTACGCCACCGCTGTTGACC  
CAAAGAAGGGAGAAATTGGCATTATTGCACCAATTGCAATTGGTTTCATCGTGGGTGCCAATATTCTGGCGGGTG  
GTGCATTTACCGGTGCTTCAATGAACCCTGCAGTGTCATTTGGTCCAGCTCTGGTCAGCTTCACCTGGACCCATC  
ACTGGGTATACCTGGGCTGGACCTCTTATCGGTGGTGGCCTTGCTGGTATTGTTTATGAAGTCTTCTTCGTCAACC  
ATTCTCAGCAACCCTTGCCAGGTTTCAGAGTAC**TGA**

>OeuTIP1;3\_Oeu035479.1

**ATG**TCTAGCGAGTTCTTTAACGTGCCACTCCGACGGGTGCTTTTGACATCGAGATGAGTTCCGCCAGCCCGGT  
GCTATCAAGGCGGCGCTAGCCGAGTTCTTCAGTACCCTGATTTTTGTGTTTGCTGGTGAGGGTTCCGGCATGGCT  
TACAACAAATTGACTGGGAATGCTCCTACCTCCCCATCCGGCCTTGTTGGCGGCAGCGGTGGCTCATGGTTTTGCT  
TTGTTTGTAGCTGTTGCCGTCAGTGCTAACATTTCCGGCGGTATGTAAACCCTGCCGTCACCTTTGGTTTGT  
CTTGGTGGAAACGTCTCTCTCTTCCGTGGTATCCTTTATATAATTGCTCAGCTGCTGGGCTCTGTGCTGCTTGC  
CTTCTCCTCTTGTCTCAACTGGTGGACTGGAAACATCTGCATTTGCTTTAACTGCCGGCGGTGTCGGTGTGGAAC  
GCCTTTGTTTTCGAGATTGTAATGACCTTTGGCCTGGTTTACACTGTGTACGCCACCGCTGTTGACCCAAAGAAG  
GGAGAAATTGGCATTATTGCACCAATTGCAATTGGTTTCATCGTGGGTGCCAATATTCTGGCGGGTGGTGCAATTT  
ACCGGTGCTTCAATGAACCCTGCAGTGTCATTTGGTCCAGCTCTGGTCAGCTTCACCTGGACCCATCACTGGGTA  
TACTGGGCTGGACCTCTTATCGGTGGTGGCCTTGCTGGTATTGTTTATGAAGTCTTCTTCGTCAACCATCTCAC  
GAACCTTGCCAGGTTTCAGAGTAC**TGA**

>OeuTIP1;3\_Oeu035479.1

MSSEFFNVPLRRVAFGHRDEFRQPGAIIKAALEFFSTLIFVFAGEGSGMAYNKLGTGNAPTSPSGLVAAAHAHGF  
LFVAVAVSANISGGHVNPAVTFGLFLGGNVSLFRGILYIIAQLLGSVVACLLLFSTGGLETSALFSTAGVSVWN  
AFVFEIVMTFGLVYTVYATAVDPKKGEIGIIAPIAIGFIVGANILAGGAFTGASMNPAVSVFPAVLSFTWTHHW  
YWAGPLIGGLAGIVYEVFFVNHSHEPLPGSEY\*

OeuTIP1;4 Oeu040290.1

>OeuTIP1;4\_Oeu040290.1 | chr4:16254381..16255311 reverse

**ATG**CCGATTTTCGAGAATAGCTGTCCGATCTCTGGCCGAGGCTAGTCAGCCGGAAGCCCTCAAGGCCACCTGGCC  
GAGTTCATTTTCGATGTTGATTTTTGTTTTGCTGGTGAAGGTTCTGGCATGGCTTTCG**GTAAGTAGTTATCCTGT**  
**ACAAATTCATTTAAAGTTTAAAGTTGTTAGAATTCGAGAATTAAATCATTGGGATTTTGACTTTTCCACAGCAA**  
AGCTTACAAACAAATGGATCGACCACGCCAACTGGCCCTAATTGCTGAGGCGATAGCGCACGCTTTTGCACTTTTCG  
TGGCGGTTTTCGGTGGTCTAACATCTCTGGCGCCACGTAAACCTGCTGTCACCTTTGGTGCCCTTTGTTGGTG  
GTCACATCACATTGATTAGGAGCATCCTGTACTGGATAGCCCAATTACTTGGATCTGTTGTTGCATGCTTGCTTC  
TTAGGTTAGCCACAGGCGGACTC**GTAAGTTGAATCTTACTGTACTATCCAGTCAAGTCGAGTCCATAACTATAAC**

AAATAGGCTAAAGTTCAATTCTTGTGTTTACAGGAAACATCAGCTTTTGCACCTTTCATCTGGAGTGACAGTTTGGAA  
TGCAGTTGTTTTTGGAGATAGTGATGACCTTTGGACTCGTTTACACAGTTTATGCTACTGCAGTGGATCCAAAGAG  
GGGTAACCTTAGGGATCATTGCCCCATTGCCATTGGCTTCATTGTAGGTGCTAACATCTTAGCCGGTGGTGCCTT  
CGATGGTGCATCCATGAACCCCGCCGTGTCTTTTGGCCCTGCTGTGGTCAGCTGGACATGGGACAACCACTGGGT  
ATTCTGGCTCGGCCATTTGTGGTGCTGGAATTGCTGCTCTGATCTATGACATCTTGTTCATTAACCAAAGCCA  
TGAACAACCTCCGTACTAGTGCAGAATAC**TAA**

>OeuTIP1;4\_Oeu040290.1

**ATG**CCGATTTTCGAGAATAGCTGTCTGGATCTCTGGCCGAGGCTAGTCAGCCGGAAGCCCTCAAGGCCACCCCTGGCC  
GAGTTCATTTTCGATGTTGATTTTTGTTTTTGTCTGGTGAAGGTTCTGGCATGGCTTTTCGCAAAGCTTACAAACAAT  
GGATCGACCACGCCAACTGGCCTAATTGCTGAGGCGATAGCGCACGCTTTTGCACCTTTTCGTGGCGGTTTCGGTC  
GGTGCTAACATCTCTGGCGGCCACGTAAACCCTGCTGTACCTTTGGTGCCTTTGTTGGTGGTCACATCACATTG  
ATTAGGAGCATCCTGTACTGGATAGCCCAATTACTTGGATCTGTTGTTGCATGCTTGCTTCTTAGGTTAGCCACA  
GGCGGACTCGAAACATCAGCTTTTGCACCTTTCATCTGGAGTGACAGTTTGAATGCAGTTGTTTTTGGAGATAGTG  
ATGACCTTTGGACTCGTTTACACAGTTTATGCTACTGCAGTGGATCCAAAGAGGGGTAACCTAGGGATCATTGCC  
CCCATTGCCATTGGCTTCATTGTAGGTGCTAACATCTTAGCCGGTGGTGCCTTTCGATGGTGCATCCATGAACCCC  
GCCGTGTCTTTTGGCCCTGCTGTGGTCAGCTGGACATGGGACAACCACTGGGTATTCTGGCTCGGCCCATTTGTC  
GGTGTGGAATTGCTGCTCTGATCTATGACATCTTGTTCATTAACCAAAGCCATGAACAACCTCCGTACTAGTGCA  
GAATAC**TAA**

>OeuTIP1;4\_Oeu040290.1

MPISRIAVGSLAEASQPEALKATLAEFISMLIFVFAGEGSGMAFAKLTNNGSTTPTGLIAEIAHAFAFVAVSV  
GANISGGHVNPAVTFGAFVGGHITLIRSILYWIAQLLGSVVACLLLRATGGLETSALSSGVTVWNAVVFV  
MTFGLVYTVYATAVDPKRNGLIIAPIAIGFIVGANILAGGAFDGAASNPAVSFGPAVVSWTWDNHVFWLGPV  
GAGIAALIYDILFINQSHEQLRTSAEY\*

## OeuTIP1;5 Oeu040289.1

>OeuTIP1;5\_Oeu040289.1 | chr4:16257013..16257943 reverse

**ATG**CCGATTTTCGAGAATAGCTGTCTGGATCTCTGGCCGAGGCTAGTCAGCCGGAAGCCCTCAAGGCCACCCCTGGCC  
GAGTTCATTTTCGATGTTGATTTTTGTTTTTGTCTGGTGAAGGTTCTGGCATGGCTTTTCG**GTAAAGTAGTTATCCTGT**  
**ACAAATTCATTTAAAGTTTAAAGTTGTTAGAATTCGAGAATTAAATCATTGGGATTTTGACTTTTTCCACAGCAA**  
AGCTTACAAACAATGGATCGACCACGCCAACTGGCCTAATTGCTGAGGCGATAGCGCACGCTTTTGCACCTTTTCG  
TGGCGGTTTCGGTCGGTGCTTAACATCTCTGGCGGCCACGTAAACCCTGCTGTACCTTTGGTGCCTTTGTTGGTG  
GTCACATCACATTGATTAGGAGCATCCTGTACTGGATAGCCCAATTACTTGGATCTGTTGTTGCATGCTTGCTTC  
TTAGGTTAGCCACAGGCGGACTC**GTAAGTTGAATCTTACTGTACTATCCAGTCAAGTCGAGTCCATAACTATAAC**  
**AAATAGGCTAAAGTTCAATTCTTGTGTTTACAGGAAACATCAGCTTTTGCACCTTTCATCTGGAGTGACAGTTTGGAA**  
TGCAGTTGTTTTTGGAGATAGTGATGACCTTTGGACTCGTTTACACAGTTTATGCTACTGCAGTGGATCCAAAGAG  
GGGTAACCTTAGGGATCATTGCCCCATTGCCATTGGCTTCATTGTAGGCGCTAACATCTTAGCCGGTGGTGCCTT  
CGATGGTGCCTCCATGAACCCCGCCGTGTCTTTTGGCCCTGCTGTGGTCAGCTGGACATGGGACAGCCACTGGGT  
CTTCTGGCTCGGCCCGTTTGTGGTGCTGGAATTGCTGCTCTGATCTATGAAATCTTGTTCATTAACCAAAGCCA  
TGAACAACCTCCGTACTAGTGCAGAATAC**TAA**

>OeuTIP1;5\_Oeu040289.1

**ATG**CCGATTTTCGAGAATAGCTGTCTGGATCTCTGGCCGAGGCTAGTCAGCCGGAAGCCCTCAAGGCCACCCCTGGCC  
GAGTTCATTTTCGATGTTGATTTTTGTTTTTGTCTGGTGAAGGTTCTGGCATGGCTTTTCGCAAAGCTTACAAACAAT  
GGATCGACCACGCCAACTGGCCTAATTGCTGAGGCGATAGCGCACGCTTTTGCACCTTTTCGTGGCGGTTTCGGTC  
GGTGCTAACATCTCTGGCGGCCACGTAAACCCTGCTGTACCTTTGGTGCCTTTGTTGGTGGTCACATCACATTG  
ATTAGGAGCATCCTGTACTGGATAGCCCAATTACTTGGATCTGTTGTTGCATGCTTGCTTCTTAGGTTAGCCACA  
GGCGGACTCGAAACATCAGCTTTTGCACCTTTCATCTGGAGTGACAGTTTGAATGCAGTTGTTTTTGGAGATAGTG  
ATGACCTTTGGACTCGTTTACACAGTTTATGCTACTGCAGTGGATCCAAAGAGGGGTAACCTAGGGATCATTGCC  
CCCATTGCCATTGGCTTCATTGTAGGCGCTAACATCTTAGCCGGTGGTGCCTTTCGATGGTGCCTCCATGAACCCC  
GCCGTGTCTTTTGGCCCTGCTGTGGTCAGCTGGACATGGGACAGCCACTGGGTCTTCTGGCTCGGCCCGTTTGTCT  
GGTGTGGAATTGCTGCTCTGATCTATGAAATCTTGTTCATTAACCAAAGCCATGAACAACCTCCGTACTAGTGCA  
GAATAC**TAA**

>OeuTIP1;5\_Oeu040289.1

MPISRIAVGSLAEASQPEALKATLAEFISMLIFVFAGEGSGMAFAKLTNNGSTTPTGLIAEIAHAFAFVAVSV  
GANISGGHVNPAVTFGAFVGGHITLIRSILYWIAQLLGSVVACLLLRATGGLETSALSSGVTVWNAVVFV  
MTFGLVYTVYATAVDPKRNGLIIAPIAIGFIVGANILAGGAFDGAASNPAVSFGPAVVSWTWDNHVFWLGPV  
GAGIAALIYEILFINQSHEQLRTSAEY\*

## OeuTIP1;6 Oeu033244.1

>OeuTIP1;6\_Oeu033244.1 | Scaffold2789:55535..57322 forward

**ATG**CCGATTTATCGGATTGCGATTGGGACGCCTGGAGAAGCGAGCCACCCTGATGCACTCAAGGCCGCGCTTGCT  
GAGTTCTTCTCTATGCTTATTTTTGTTTTGCTGGTCAAGGCTCCGGGATGGCTTTTA**GTACGTTTCGCTCTTTCT**  
**CCTCTACATCTATTTATATTCCGTTGATACGAAACAATGATCGAATTAACGGAGACTCTAGGAATCCCACCTTTCT**  
**TCATTTGATATTTGATGGGCTAGTGTGAGCTTATCGAATAATATTTTTCTTAAAGATCCTGGCTTAATCTTCCC**  
**TGGAAAGACACGTATGAGATCTTCAATTTTTGGGAGTTTTCTATGCTATCATTTTTCAATCTTCTTGTGTGCTGG**  
**TATCTCATTCGTGTACATCATTTTCTTATTTTTTCGATCTTCTAACGTAAAACGTTTGATGATTGTATCATATTAT**  
**GGCAGATAAGTTGAGCAATGATGGGTCACCAAATCCATCAGGACTGCTAGCTGCAGCATTAGCCCATGCATTTGC**  
**ACTTTTTGTGGCAGTCTCAGTAGGTGCAAACATATCAGGGGGTCATGTGAATCCTGCTGTACAGTTTGGTGCTTT**  
**CATTGGTGGAACATAACACTTTTTGAGGAGCATTTTGTACTGGATTGCTCAATTACTTGGCTCTGTTGTTGCCTG**  
**CATACTTCTTAAGTTTGCTACTGGAGGATTGGTAAGAAAGTTGATCGTTTTACGACAAATTTGCTTCCAAACTA**  
**CGAAATTTTTGGTGTAATAAATCATTGATTGTTTCGTAAAAATAGGGTCGTTGAGAGAACTCTTTTCGTTGTT**  
**AAATGTGAAATTTCTTGTAGTAGCTTAATTCAGTGCATTAATCAACAATGATTTGCTTCCATTACTGGAATTTTA**  
**CAAATTTTAGTCTTTTCATTGTCTGAACCTAGAATATATGTAAGAATTTATACATGTTGGAGAAAAAGGAGAAC**  
**AAGATAGATGGCGATGCCCTCCCAAGTAAATCTAGACATACCTGAGTATTAGAGAATATACAATTCATGTCTAGA**  
**TGGTTTGAAATTCAAACAAAAATAGAAATGGAAAATTTGGTAAAAATTTGAAGAGCCCATCTCATTTCCCTCGTCT**  
**TTTACTCGTGTAAGTAAATAATAAGGCTTTAGGGCATTTATACACTTTCTTAAACATAACATTACCTCCCCAATC**  
**CAAGAGACAAGTTATCTTGAGGAGTATGCAACAACCCCTCAATACTTTCTATCATAACTTGTAAATAGATAATTA**  
**AATATGTATTTATGTAATTTATTTATGCAAGTAAAAATAAATGTGGCAAAATATATTGAAGTACCAAGTAAAAAG**  
**TTATACATTTCTAATCTTCTTCTTCTTCTTTTGACGTGGGACCTTGTTTTATTTCATTTTATGACAACTTACTTTC**  
**AACATGTACGTTACGATTTTTCGTGGGATGAAATCGACATATGAGCCAACCTATATATTGCAGGAAACATCAGCA**  
**TTTGCCCTTGTCGTCCGGTGTTTTCTGTGTGGAACGCCCTAGTTTTTGAGATTGTGATGACCTTCGGGCTGGTGTAT**  
**ACGGTGTATGCTACTGCAGTGGATCCAAAAAGGGTAATTTGGGAAACATTGCACCCATTGCAATTGGGTTTCATT**  
**GTGGGTGCCAATATCTTAGCAGGTGGTCCATTTGATGGTGCATCAATGAACCCAGCAGTCTCCTTTGGACCAGCT**  
**GTGGTCAGTTTGTGCGTTTTTTGATCAGAAAGATCGAATTAGATTATCGATTAAAGAAAA**TAA****

>OeuTIP1;6\_Oeu033244.1

**ATG**CCGATTTATCGGATTGCGATTGGGACGCCTGGAGAAGCGAGCCACCCTGATGCACTCAAGGCCGCGCTTGCT  
GAGTTCTTCTCTATGCTTATTTTTGTTTTGCTGGTCAAGGCTCCGGGATGGCTTTTAATAAGTTGAGCAATGAT  
GGGTACCAAATCCATCAGGACTGCTAGCTGCAGCATTAGCCCATGCATTTGCACCTTTTTGTGGCAGTCTCAGTA  
GGTGCAAACATATCAGGGGGTCATGTGAATCCTGCTGTACGTTTTGGTGCTTTCATTGGTGGAACATAACACTT  
TTGAGGAGCATTTTGTACTGGATTGCTCAATTACTTGTCTGGCTCTGTTGTTGCCTGCATACTTCTTAAGTTTGCTACT  
GGAGGATTGGAACATACGCAATTTGCCTTGCTCGTCCGGTGTTTTCTGTGTGGAACGCCCTAGTTTTTGAGATTGTG  
ATGACCTTCGGGCTGGTGTATACGGTGTATGCTACTGCAGTGGATCCAAAAAGGGTAATTTGGGAAAAATTGCA  
CCCATTGCAATTGGGTTTCATTGTGGGTGCCAATATCTTAGCAGGTGGTCCATTTGATGGTGCATCAATGAACCCA  
GCAGTCTCCTTTGGACCAGCTGTGGTCAGTTTGTGCGTTTTTTGATCAGAAAGATCGAATTAGATTATCGATTAAAG  
GAAAA**TAA**

>OeuTIP1;6\_Oeu033244.1

MPIYRIAIGTPGEASHPDALKAALAEFFSMLIFVFAGQGSMAFNKLSNDGSPNPSSGLLAAALAHAFALFVAVSV  
GANISGGHVNPVTFGAFIGNITLLRSILYWIAQLLGSVVACILLKFATGGLETSALSSGVSVWNALVFEIV  
MTFGLVYTVYATAVDPKKGNLGNIAPIAIGFIVGANILAGGPFDGASMPAVSFPAVVSLSVFDQKDRIRLSIK  
EK\*

## OeuTIP1;7 Oeu045237.1

**Observation:** 2059n were removed at the 5' extremity

>OeuTIP1;7\_Oeu045237.1 | chr11:5859698..5862731 reverse **original version**

**ATG**CCGGTCAGCAGGATAGCGGTGGGGAGGCTGGAAGAGGCGACTCAGCAGGACGCCTTGAAAGCGGCATTGGCT  
GAGTTCATATCAACCCTAATATTTGTGTTTGCTGGCTCAGGTTTCAGGCATGGCCTTCAACAAGCTAACAGACGAC  
GGAGCCACCCTCCGGCAGGCCTCATTGCAGCTGCAGTGGCCCATGCATTTGCACCTTTTCGTGGCTGTTTCCGTT  
GGTGCCAACATTTCCGGTGGCCATGTTAACCCTGCT**GTCACTTTTGGAGCCTCTAAAAAGAAAAATATTTTTCAT**  
**CTTTTGTGGAAAATAAAAAATCACCTCTACCCAAGGAAAATGTTTTCTTGAACAAGAAAAATTAAGCATATTT**  
**TCAAAAGTTGGAAAATATTTTTTCATGAAAAAAATAGCAATCAAATACTCTAAATAGGAATTTGGGTGGAAAATTT**  
**GATATTTTTTCATGAAAAATAAATGTAATCAAACACACTCTTAAAGAGGATATACTGAGAATAATCAACTTCAATT**  
**TTCGTTATCGCCGGCCTAGATTACATCGGCAATTATTTACAATAATAAATAAGACTCGATGATAAACTATATAAA**  
**ATTTGAATTTACTAGTGAAAATTTTACAATATACTGAATGAAACTTATCGAACATGCGTAGACAGCCCCAAGGAAA**  
**AGGTTGCCCTTAGACGTGGAATCACCTAGCATAGATCGGTTCAATCTAGCTCAATTAACCAACACACCACGAC**  
**TTTTTCCATTGTTAGTAGTCAATTTTGATCGATTCTTCAATTGTTTGGACATATTGCTCATTTTAAATCAAA**  
**TTATGATATAGTATATTAAGAGCCTGTTTGGGAGTAATTTGAGAATTGATTTTTTGACCGTTAAAAAAAGTG**  
**GGGTCCACCTGTAAGAGAAGAAGTCAAATATGACGACTAAAAATAGTGAAATAACGGTCAAAAAATCAAATTTTTG**

GATGAAAAAATCGCTCCCAAACCTGACCCTAAGTAAAGAAAATACTTAACAAATTTATCACGCCACATATGTCATA  
TTTATCTCATAACACGAGTGTGTAAAGTTCCATCCAGTCTTATCATATCTTAGAGTTATTCTTTTCATCATCATTA  
AATAATCGCAAATTATTATTCAATATAAAAAACATTACATTAAAAAGTGTAATAAATTAATGTTGTTAGTTT  
TTCATTTAGTTGCCCTCATGACACAGCCACTACACCACAAAATATTCTTTTGAAAAATAAATATCAATTAAGTTA  
TAATATAATTCAAATACTTGAACCTTATCTTATTGTTTGAGTTACATGTCTTTGTCTTATCAAAGATTCTGTTTAT  
CTAAAGAATAATTCTATTTGTAGGTAGGATTAGCAAGTTTCATAAGGTGCTCCCCATGATTTAAAAAGTTAAATTA  
ATTTTTTTTTATGTTAAAAATTCAAATGTTAAATAGGCATTCAACGAGTCACGATGACTATTTCAAATTATACAA  
ATTAATATTTAAAAATTTAAATTTGTTGATCACAAATAATATTAGAATTTGTTAATGAATTTTGAATCTAGCGTATT  
CTACGTAGCGATTTTCTCTCTATTTATTGGTGTAGGACAAGCGATTTTCATTAATTTTCTATTATATGTTTGAC  
AATCATTAATAAATTTTTTTTTTCTCAAACCTCATTTTTTATTTCAGACATTCTTACAATGAAATACTTTGCATATAAA  
TCTATAATTTTTTTCATACTTTTTTAAGTACATATTTTTCAAATAATTTATTATTTCAAATTTTATTATTTTCAA  
AAAATTTTCATTTTAATAGTTGTGGCTAAAAGTAAAAGAAAAAAGAAATACACTTATATACGCAGTCGTGTCAC  
ATCTAATCCCTTTATCCATCCATCAATTGCTTAACTGTATGATTCTTGATTTCTTTTGAATGATTGGACACAAA  
ATATTTATTTAAATATACAAAAATAAACAAACACGTACTGTATTAGTATAATCCATTTTAAACGGAAACTGGCT  
ATATCAGGTAGCACATTCCCTTCAGCATCAGTATATGTACTCGAACAGCATGAGAAGTGGAACCAAGTAATATAC  
TCACCAGAAAGATTCAAAGGAAGTGTGTTTCTGGTACCCAGTTAATTTTTCAATTATTCGAAGATGCCGGTCAG  
CAGGATAGCGGTGGGGAGGCTGGAAGAGGCGACTCAGCAGGACGCCTTGAAGGCGGCATTGGCTGAGTTCATATC  
AACCCTAATATTTGTGTTTGTGCTGGCTCAGGTTTCAGGCATTGGCCTTCAACAAGCTAACAGACGACGGAGCCACC  
TCCGGAGGCCCTCATTGCAGCTGCAGTGGCCCATGGCATTTCGATCTTTTCGTTGGCTGTTTCCGTTGGTGCCAA  
TTCGGGTGGCCATGTTAACCTGCTGTCACCTTTTGGAGCCTTTGTCGGTGGAATATTAGCCTTATCCGTTGTTAT  
CCTCTACTGGATTGCTCAGTTGCTTGGTTCTGTCGTTGCTTGGCTTCTCAAGTTTCGCCACCGGTGGTGTGTTG  
GAGTTTTTCGCCCTCTTGCCTGAAAATTCTGTCTCTGTTTTACAATAATCACTTCGTCTAAAAGCTCAAGTTAAC  
GAAAAACATTCACCCCATTTGTAATTTTTATTTTTTCAGACTACTGCAGCCTTTTCATTGTCAGCTGGAGTCAACG  
ATGGAATGCATTTGTATTAGAAATTGTGATGACCTTTGGGCTAGTCTACACCGTGTACGCCACCGCAGTGGATCC  
AAAGAGGGGCGAGTTTGGGAACAATTGCACCAATTGCTATTGGTTTCATTGTGGGTGCCAACATCTTAGCTGGTGG  
GGCCTTTGATGGGGCCTCAATGAACCCAGCAGTGTCAATTCGGCCAGCTGTGGTGAGCTGGACCTGGGACAACCA  
CTGGGTCTATTGGGCCGGGCCTCTAATTGGTGGTGGGCTTGTCTGGGCTTATCTATGAGTTCTTCTTCATTAACCA  
AACCCATGAACAGTTGCCTACAACCTGATCAT**TAA**

>OeuTIP1;7\_Oeu045237.1 chr11:5861757..5862731 reverse **Corrected version**

**ATG**TACTCGAACAGCATGAGAAGTGGAACCAAGTAATATACTCACCAGAAAGATTCAAAGGAAGTGTGTTCTGG  
TACCCAGTTAATTTTTCAATTATTTCGAAGATGCCGGTCAGCAGGATAGCGGTGGGGAGGCTGGAAGAGGCGACT  
CAGCAGGACGCCTTGAAGGCGGCATTGGCTGAGTTTCATATCAACCCTAATATTTGTGTTTGTCTGGCTCAGGTTCA  
GGCATGGCCTTCAACAAGCTAACAGACGACGGAGCCACCCTCCGGCAGGCCTCATTGCAGCTGCAGTGGCCCAT  
GCATTTGCACTTTTTCGTTGGCTGTTTCCGTTGGTGCCAAACATTTCCGGTGGCCATGTTAACCTGCTGTCACCTTT  
GGAGCCTTTGTGCGTGGAATATTAGCCTTATCCGTGGTATCCTCTACTGGATTGCTCAGTTGCTTGGTTCTGTC  
GTTGCTTGGCTTCTCAAGTTTCGCCACCGGTGGTTTGTGAGTTTTTCGCCCTCTTGCCTGAAAATTCTGTCT  
CTGTTTTACAATAATCACTTCGTCTAAAAGCTCAAGTTAACGAAAAACATTCACCCCATTTGTAATTTTATTTTT  
CAGACTACTGCAGCCTTTTCATTGTCAGCTGGAGTCAACGATGGAATGCATTTGTATTAGAAATTGTGATGACC  
TTTGGGCTAGTCTACACCGTGTACGCCACCGCAGTGGATCCAAAGAGGGGCAGTTTGGGAACAATTGCACCAATT  
GCTATTGGTTTTATTGTGGGTGCCAACATCTTAGCTGGTGGGGCCTTTGATGGGGCCTCAATGAACCCAGCAGTG  
TCATTCGGCCAGCTGTGGTGAGCTGGACCTGGGACAACCACTGGGTCTATTGGGCCGGGCCTCTAATTGGTGGT  
GGGCTTGTGGGCTTATCTATGAGTTCTTCTTCATTAACCAAACCCATGAACAGTTGCCTACAACCTGATCAT**TAA**

>OeuTIP1;7\_Oeu045237.1

**ATG**TACTCGAACAGCATGAGAAGTGGAACCAAGATAGCGGTGGGGAGGCTGGAAGAGGCGACTCAGCAGGACGCC  
TTGAAGGCGGCATTGGCTGAGTTTCATATCAACCCTAATATTTGTGTTTGTCTGGCTCAGGTTTCAGGCATGGCCTTC  
AACAAGCTAACAGACGACGGAGCCACCCTCCGGCAGGCCTCATTGCAGCTGCAGTGGCCCATGCATTTGCACTT  
TTCGTTGGCTGTTTCCGTTGGTGCCAAACATTTCCGGTGGCCATGTTAACCTGCTGTCACCTTTGGAGCCTTTGTC  
GGTGGAATATTAGCCTTATCCGTGGTATCCTCTACTGGATTGCTCAGTTGCTTGGTTCTGTCGTTGCTTGTCTG  
CTTCTCAAGTTTCGCCACCGGTGGTTTGTACTACTGCAGCCTTTTCATTGTCAGCTGGAGTCAACGATGGAATGCA  
TTTGTATTAGAAATTGTGATGACCTTTGGGCTAGTCTACACCGTGTACGCCACCGCAGTGGATCCAAAGAGGGGC  
AGTTTGGGAACAATTGCACCAATTGCTATTGGTTTTCATTGTGGGTGCCAACATCTTAGCTGGTGGGGCCTTTGAT  
GGGGCCTCAATGAACCCAGCAGTGTCAATTCGGCCAGCTGTGGTGAGCTGGACCTGGGACAACCACTGGGTCTAT  
TGGGCCGGGCCTCTAATTGGTGGTGGGCTTGTCTGGGCTTATCTATGAGTTCTTCTTCATTAACCAAACCCATGAA  
CAGTTGCCTACAACCTGATCAT**TAA**

>OeuTIP1;6\_Oeu045237.1

MYSNSMRSGNQIIVGRLEEATQQDALKAALAEFISTLIIVFAGSGSGMAFNKLTDDGATTPAGLIAAAVAHAFA  
FVAVSVGANISGGHVNPAVTFGAFVGGNISLIRGILYWIAQLLGSVVACLLKLFATGGLTTAAFSLSAGVNVWNA  
FVLEIVMTFGLVYTVYATAVDPKRGLGTIPIAIGFIVGANILAGGAFDGASMNPAVSFGPAVVSWTWDNHVY  
WAGPLIGGGLAGLIYEFFFINQTHEQLPTTDH\*

## OeuTIP2;1 Oeu024074.1

>OeuTIP2;1\_Oeu024074.1 | chr2:21805437..21806390 reverse

ATGCCTGCAATTGCTGTGCGGAAGATTAGATGATTCATTTAGCATTGGTTTCGTTGAAGGCCTATGTAGCTGAATTC  
ATCTCCACCTTGCTCTTTGTTTTTCGCCGGAGTCGGCTCCGCCATTGCCTACA**GTTAGTTCTAAAAACCGTTTTCTT**  
**ATTTTTTTTTAAGTTAACAAGCACTTGGTAACATTTTGATCTTTGACAG**ACAAGTTGACGGCGGACGCAGCTCTTG  
ATCCGGCGGGGCTGGTGGCTGTGGCCATCTGCCATGGTTTCGCTCTGTTTGTAGCCGCTCTCGATCGGAGCCAACA  
TCTCCGGTGGCCATGTAAACCTGCAGTCACCTTTGGTTTGGCTGTTGGCGGCCAAATTACGCTACTTACTGGCC  
TCTTTTACTGGATTGCTCAACTTTTGGGCTCCATTGTGGCATGCTATTTACTCGTATTCGTAACCGGAGGATT**G**  
**TATGTCCACCCAAAATAATATTTTTAAAATTCGAGTCGGTTTTTTATTTACAGAGTTTTTATAGTCCGATTCTTGAT**  
**TTCTCTGGCTAAACTACCCCGATTAGTTCGATTCTTAACAAAATATATAATTTTCATGCAG**GCTATTCCAATTCAT  
GGAGTTGGTGTGCTGGTGTGGAGCCTTTGAAGGAGTTGTTATGGAAATTGTTATCACATTTGCTTTAGTCTATACT  
GTGTATGCGACAGCAGCTGATCCAAAGAAGGGCTCATTGGGCACAATTGCACCCATAGCCATTGGTTTCATTGTT  
GGTGCCAATATTTTGGCTGCCGGTCCATTTTCAGGTGGGTCGATGAACCTGCCCGCTCCTTCGGACCGGCTGTG  
GCCAGCGGCAACTTCTCCGGCATCTGGATTTACTGGGTTGGACCCCTCATTGGTGGTGGCCTCGCCGGTCTCGTC  
TACGCCTATGTGTTTCATGTCCCACGAGCATGCTCCCCTACCTACCGACTTT**TAA**

>OeuTIP2;1\_Oeu024074.1

ATGCCTGCAATTGCTGTGCGGAAGATTAGATGATTCATTTAGCATTGGTTTCGTTGAAGGCCTATGTAGCTGAATTC  
ATCTCCACCTTGCTCTTTGTTTTTCGCCGGAGTCGGCTCCGCCATTGCCTACAACAAGTTGACGGCGGACGCAGCT  
CTTGATCCGGCGGGGCTGGTGGCTGTGGCCATCTGCCATGGTTTCGCTCTGTTTGTAGCCGCTCTCGATCGGAGCC  
AACATCTCCGGTGGCCATGTAAACCTGCAGTCACCTTTGGTTTGGCTGTTGGCGGCCAAATTACGCTACTTACT  
GGCCTCTTTTACTGGATTGCTCAACTTTTGGGCTCCATTGTGGCATGCTATTTACTCGTATTCGTAACCGGAGGA  
TTGGCTATTTCCAATTCATGGAGTTGGTGTGCTGGTGTGGAGCCTTTGAAGGAGTTGTTATGGAAATTGTTATCACA  
TTTGCTTTAGTCTATACTGTGTATGCGACAGCAGCTGATCCAAAGAAGGGCTCATTGGGCACAATTGCACCCATA  
GCCATTGGTTTCATTGTTGGTGCCAATATTTTGGCTGCCGGTCCATTTTCAGGTGGGTCGATGAACCTGCCCGC  
TCCTTCGGACCGGCTGTGGCCAGCGGCAACTTCTCCGGCATCTGGATTTACTGGGTTGGACCCCTCATTGGTGGT  
GGCCTCGCCGGTCTCGTCTACGCCTATGTGTTTCATGTCCCACGAGCATGCTCCCCTACCTACCGACTTT**TAA**

>OeuTIP2;1\_Oeu024074.1

MPAIAVGRLLDSFSIGSLKAYVAEFISTLLFVFAGVGSIAIYNKLTADAALDPAGLVAVAICHGFALFVAVSIGA  
NISGGHVNPAVTFGLAVGGQITLLTGLFYWIAQLLGSIVACYLLVFTGGLAIPIHVGAGVGAFEGVMEIVIT  
FALVYTVYATAADPKKGLGTIAPIAIGFIVGANILAAGPFGSGSMNPARSFGPVASGNFSGIWIYVWGPLIGG  
GLAGLVYAYVFMSEHAPLPTDF\*

## OeuTIP2;2 Oeu024076.1

>OeuTIP2;2\_Oeu024076.1 | chr2:21795643..21796596 reverse

ATGCCTGCAATTGCTGTGCGGAAGATTAGATGATTCATTTAGCATTGGTTTCGTTGAAGGCCTATGTAGCTGAATTC  
ATCTCCACCTTGCTCTTTGTTTTTCGCCGGAGTCGGCTCCGCCATTGCCTACA**GTTAGTTCTAAAAACCGTTTTCTT**  
**ATTTTTTTTTAAGTTAACAAGCACTTGGTAACATTTTGATCTTTGACAG**ACAAGTTGACGGCGGACGCAGCTCTTG  
ATCCGGCGGGGCTGGTGGCTGTGGCCATCTGCCATGGTTTCGCTCTGTTTGTAGCCGCTCTCGATCGGAGCCAACA  
TCTCCGGTGGCCATGTAAACCTGCAGTCACCTTTGGTTTGGCTGTTGGCGGCCAAATTACGCTACTTACTGGCC  
TCTTTTACTGGATTGCTCAACTTTTGGGCTCCATTGTGGCATGCTATTTACTCGTATTCGTAACCGGAGGATT**G**  
**TATGTCCACCCAAAATAATATTTTTAAAATTCGAGTCGGTTTTTTATTTACAGAGTTTTTATAGTCCGATTCTTGAT**  
**TTCTCTGGCTAAACTACCCCGATTAGTTCGATTCTTAACAAAATATATAATTTTCATGCAG**GCTATTCCAATTCAT  
GGAGTTGGTGTGCTGGTGTGGAGCCTTTGAAGGAGTTGTTATGGAAATTGTTATCACATTTGCTTTAGTCTATACT  
GTGTATGCGACAGCAGCTGATCCAAAGAAGGGCTCATTGGGCACAATTGCACCCATAGCCATTGGTTTCATTGTT  
GGTGCCAATATTTTGGCTGCCGGTCCATTTTCAGGTGGGTCGATGAACCTGCCCGCTCCTTCGGACCGGCTGTG  
GCCAGCGGCAACTTCTCCGGCATCTGGATTTACTGGGTTGGACCCCTCATTGGTGGTGGCCTCGCCGGTCTCGTC  
TACGCCTATGTGTTTCATGTCCCACGAGCATGCTCCCCTACCTACCGACTTT**TAA**

>OeuTIP2;2\_Oeu024076.1

ATGCCTGCAATTGCTGTGCGGAAGATTAGATGATTCATTTAGCATTGGTTTCGTTGAAGGCCTATGTAGCTGAATTC  
ATCTCCACCTTGCTCTTTGTTTTTCGCCGGAGTCGGCTCCGCCATTGCCTACAACAAGTTGACGGCGGACGCAGCT  
CTTGATCCGGCGGGGCTGGTGGCTGTGGCCATCTGCCATGGTTTCGCTCTGTTTGTAGCCGCTCTCGATCGGAGCC  
AACATCTCCGGTGGCCATGTAAACCTGCAGTCACCTTTGGTTTGGCTGTTGGCGGCCAAATTACGCTACTTACT  
GGCCTCTTTTACTGGATTGCTCAACTTTTGGGCTCCATTGTGGCATGCTATTTACTCGTATTCGTAACCGGAGGA  
TTGGCTATTTCCAATTCATGGAGTTGGTGTGCTGGTGTGGAGCCTTTGAAGGAGTTGTTATGGAAATTGTTATCACA  
TTTGCTTTAGTCTATACTGTGTATGCGACAGCAGCTGATCCAAAGAAGGGCTCATTGGGCACAATTGCACCCATA  
GCCATTGGTTTCATTGTTGGTGCCAATATTTTGGCTGCCGGTCCATTTTCAGGTGGGTCGATGAACCTGCCCGC  
TCCTTCGGACCGGCTGTGGCCAGCGGCAACTTCTCCGGCATCTGGATTTACTGGGTTGGACCCCTCATTGGTGGT  
GGCCTCGCCGGTCTCGTCTACGCCTATGTGTTTCATGTCCCACGAGCATGCTCCCCTACCTACCGACTTT**TAA**

**>OeuTIP2;2\_Oeu024076.1**

MPAIAVGRLLDDSFISGLKAYVAEFISTLLFVFAGVGSIAIYNKLTADAALDPAGLVAVAICHGFALFVAVSIGA  
NISGGHVNPVATFGLAVGGQITLLTGLFYWIAQLLGSIVACYLLVFTGGGLAIPIHVGAGVGAFEGVVMIEIVIT  
FALVYTVYATAADPKKGLGTIPIAIGFIVGANILAAGPFSGGSMNPARSFGPVAVASGNFSGIWIYVWGPLIGG  
GLAGLVYAYVFMSEHAPLPTDF\*

**OeuTIP2;3 Oeu053988.1**

**>OeuTIP2;3\_Oeu053988.1 | chr22:5185229..5186864 forward**

**ATG**CCAACCATTGCCTTCGGACGAATCGATGATTCATTAAGCGTTGGCTCTTTGAAGGCCATTTAGCCGAATTC  
ATCTCGACTTTGCTCTTCGCTCTTCGCTGGAGTCGGCTCAGCCATTGCTTACA**GT**TAGTCATCACTTCTTTTTCTCT  
TTTAATAAAGTAAGATTTGATGCAGCACAATTCACACGAATCCCTCTCCCTGTACAAATCATTCAAGAGGGAGGAA  
AATACGCAGAATTCCTCGTTAGATCGGATCTATTAGACTCATTCTTTGGTGTTTCTCACTCTTTCACACACGCTA  
GGTGTGAGAGATTGATGCATAAAATAAAATTAACCCTAGCCATGCAATGCAGCTTGTGATTATAAATGTTGGTTT  
CGTATACAGTTCTAATTTGTGGGTATGTTTGATATTCTATTTTCGACAGACAAGTTGACATATGATGCGGCTCTCG  
ACCCAGCGGGGCTGGTAGCGGTGGCGGTCTGCCACGGATTTGCTCTGTTTGTGGCGGTTTTCGATCGGAGCCAACA  
TCTCCGGTGGCCATGTAAACCCTGCAGTCACCTTTGGTTTGGCTGTTGGTGGCCAAATTACAATTCTCACTGGCC  
TCTTCTATTGGATTGCTCAACTTTTGGGCTCCATTGTAGCATGCTTCTTGCTCAAATTTGTACAGGTGGCTTGG  
TAAGTTGTTGTTCTATAATTATGTTATTCTTGAATTCCTTTCTAACTTCCTTCAAATGTGAGAGAGGGGATAAGA  
TTATGTCTTGATACGTCCTCCCATCACGTACATTCCTTTTTTTTTTTTTTTTAAATCAAAAGTTGACGCGTACACAAT  
TTCCGTAAATAAATAAAGATTTTAAATCTCTGACTTTAAAGTTCTAATGCCATTTTGACTAAATCTAAAGAT  
TCATATCTAATCTAAACATACATTCTCAAAACTAAAGTTGATTAATTGTACTCCTTTTCGACTTTCAACACAAA  
GAATAGTAAATCTTCACCATGTGTAGTTCATATTCTGTTTGAATAAAAATGCTAACACGTGCACAATTTTCATAA  
ATGAATGACGACAAAATTTGAACCTGGTTCTCTATGTGTTCTCTACAATTTTGACTCGATCTAAAAGTTTACAA  
CTGATCTAAGCTTACAGTACAAATGAGAATTGTATTCTTTTTCAACTTTCAACACGTTATATTAAAGAATAATCG  
ATCTTGAATGATTTTATAAACAAGTGTCTAATTATGTTTGTAAATTTGATGATTAATTTCTATGTAGGCCATTCC  
AACTCACAGTATGGCAGCTGGTGTGGAGCCATTGAAGGAGTTGTGATGGAAATTGTTATCACTTTTGCTTTGGT  
GTACACAGTTTATGCCACAGCAGTTGACCCAAAGAAGGGCTCATTAGGCACAATTGCCCCCATTGCCATTGGCTT  
CATTGTTGGGGCCAACATTTTGGCCGCCGGCCCATTTCTCCGGTGGCTCAATGAACCCGGCTAGGTCTTCCGGTCC  
GGCTGTGGCCAGCGGTGACTTTGCCGACAACCTGGATTTACTGGGTCCGTCCACTCATCGGTGGTGGTCTGGCTGG  
ACTCGTCTATGCCTATGTGTTTATGGTCCACGAACACGTTCTCTTGTAGCGAGTTC**TAA**

**>OeuTIP2;3\_Oeu053988.1**

**ATG**CCAACCATTGCCTTCGGACGAATCGATGATTCATTAAGCGTTGGCTCTTTGAAGGCCATTTAGCCGAATTC  
ATCTCGACTTTGCTCTTCGCTCTTCGCTGGAGTCGGCTCAGCCATTGCTTACAACAAGTTGACATATGATGCGGCT  
CTCGACCCAGCGGGGCTGGTAGCGGTGGCGGTCTGCCACGGATTTGCTCTGTTTGTGGCGGTTTTCGATCGGAGCC  
AACATCTCCGGTGGCCATGTAAACCCTGCAGTCACCTTTGGTTTGGCTGTTGGTGGCCAAATTACAATTCTCACT  
GGCCTCTTCTATTGGATTGCTCAACTTTTGGGCTCCATTGTAGCATGCTTCTTGCTCAAATTTGTACAGGTGGC  
TTGGCCATTCCAACCTCACAGTATGGCAGCTGGTGTGGAGCCATTGAAGGAGTTGTGATGGAAATTGTTATCACT  
TTTGCTTTGGTGTACACAGTTTATGCCACAGCAGTTGACCCAAAGAAGGGCTCATTAGGCACAATTGCCCCCATT  
GCCATTGGCTTCATTGTTGGGGCCAACATTTTGGCCGCCGGCCCATTTCTCCGGTGGCTCAATGAACCCGGCTAGG  
TCCTTCCGGTCCGGCTGTGGCCAGCGGTGACTTTGCCGACAACCTGGATTTACTGGGTCCGTCCACTCATCGGTGGT  
GGTCTGGCTGGACTCGTCTATGCCTATGTGTTTATGGTCCACGAACACGTTCTCTTGTAGCGAGTTC**TAA**

**>OeuTIP2;3\_Oeu053988.1**

MPTIAFGRIDDSLSVGLKAYLAEFISTLLFVFAGVGSIAIYNKLTIDAALDPAGLVAVAVCHGFALFVAVSIGA  
NISGGHVNPVATFGLAVGGQITILTGLFYWIAQLLGSIVACFLKFTGGGLAIPHTSMAAGVGAIIEGVVMIEIVIT  
FALVYTVYATAVDPKKGLGTIPIAIGFIVGANILAAGPFSGGSMNPARSFGPVAVASGDFADNWIYVWGPLIGG  
GLAGLVYAYVFMVHEHVPLVSEF\*

**OeuTIP2;4 Oeu002329.1**

**>OeuTIP2;4\_Oeu002329.1 | chr13:8623502..8625525 reverse**

**ATG**TGTAAGATGACATTGGGTAGCATTGGTGACTCTTTTTCAGTTCCGTCGCTAAAGGCTTATCTTGCTGAGTTC  
ATTGCCACCCTCCTCTTTGTCTTTGCTGGTGTGGTTCCGCTATAGCTTACAG**TA**AGTACATATTTCTGTTTTC  
ATAAAGTGTATATATTTTACGGTCGGCCCCCAAGCCAGATATAGAATGAGGGTCGGGTAGGTTAAGAGCAAGT  
GTAAACTTTTATCAAAGCTTATGATATTAGTCGATTTCAAATTTATTGGAATTTGTGCAGACAAGCTCACGTCCG  
ATGCAGCTCTCGACCCACCTGGATTGGTGGCAGTAGCGGTGGCTCACGCATTTGCATTGTTTGTGGGCGTTTCCA  
TGGCGGCCAATGTATCCGGCGGTATCTGAATCCGGCCGTACATTTGGACTGGCCATCGGAGGCAACATCACAA  
TCATAACTGGCATTTTCTATTGGATTGCCAGTTGCTTGGTTCCACTGTTGCATGCCTCTCCTCAAATTCGTCA  
CTAATGGCTTGTGTAAGTCATTCCCAATACCAAAATTTAATCTTATTTTGACAGTAAAGCAATAAAATTACCACCG  
CAGGAGCTTTCTTAATGGCCTCCGGAGGTCATCTCGTGACCTTGGGGATTTCTGTGATTAAAAAAGAGAGAG  
CAAAAGAAAAAGAAAGTTATTCATCCTTTGGATTAAATTGAATATGCGAGCTTGTTCATCGTTTGTGTTATACA

AAGTATCGAACCAAACATATCTCGAACTTAGAAGATTTACAGAAAACCTTAAAGAAATTCACAACCTTCCTTACAAG  
CTTTCTCAAACCGCTACCATGGCATCAAGAATGAATATGTTTCAATGGGACCCAGAAAACGAATTGTACCCGCTCT  
GTGTGACTAAAATCCTAACCCAGATCATCAAGCACACGTTTATAGATTAAAGGAAGCCATAAGGGTGGATGAGTT  
CTCACCATCTCTTATCAGTACACAAAGTATCAAGATTACACAAAGAATCAGAAAGAAAATCAACGTCCAATAAAAA  
AACTGGAAGATGAATACAAAAGAGACAGGAAGAGTCACAAAGCATACACACGACGCAAACCTAAGAATGAAAGA  
ATAGGGCAAAAAATTATGTATAGGCTTTGAACCATTGATCAGATTCCAATCTAACGGTCTAGTTGGCTCCTCAA  
CAAAGAAGAAATCGTGTGAGTCTGTAACAATAAAAGTACACGCCTTAAACACGACTTTAGTGCAATTGGACTCG  
GGTAACTGGGTACACCACATTATTGGGCAATTGTAGGTTTTAATAGAAAATGATTTTGGGCCTTAACCTTATCA  
TCATTGCCCCAAGAGATAATTTGCCATCACAACCCAACAGTATATTTGTATAGGAATCTAATTTTTGTAAAGAG  
CATTTTGACAAAATTACTCTATTGTGCCAATTTTCTAACTAGATATAGTACTTTCAGAAAATTATTTAAACATG  
TTCAAAAACAGCTTGAAACAGTTTTTGTACTACATGCTCTTTAAATTAACCTGAATTAGACTCCATCTAGGGT  
GAATCAAGATGGGTTTTTTTCGAGTTTTTCTAAATGTGCTAGGCCAAAACCATACTAATAGTTGGTGTTTGGCAGG  
CCATTCCCCTCATGCAGTTGCTTCTGGAATGAATGCTGTGGAGGGTGTAGTAATGGAGATTGTCATCACTTTTG  
CTCTAGTCTACACAGTCTATGCCACTGCAGCAGACCCCCAAAAAGGGCTCATTGGGCATAATTGCACCCATTGCAA  
TTGGGTTTATTGTTGGTGAAACATTTTAGCTGCTGGCCCATTAGTGGTGGATCAATGAACCCGGCCAGATCAT  
TTGGGCCGGCCGTTGCTGCTGGAGACTTCTCTCAGAACTGGATCTATTGGGTTGGCCCATTATTGGGGGAGGAT  
TGGCAGGCCTGGTCTATGGTTATGTTTTATTGCATCATATGCCCCATTCCCAGCCCAAGAGGGATATGCTTAA

>OeuTIP2;4\_Oeu002329.1

ATGGTGAAGATGACATTGGGTAGCATTGGTGACTCTTTTTTCAGTTCCGTCGCTAAAGGCTTATCTTGCTGAGTTC  
ATTGCCACCCTCCTCTTTGTCTTTGCTGGTGTGGTTCCGCTATAGCTTACAACAAGCTCACGTCCGATGCAGCT  
CTCGACCCACCTGGATTGGTGGCAGTAGCGGTGGCTCACGCATTTGCATTGTTTGTGGGCGTTTCCATGGCGGCC  
AATGTATCCGGCGGTCTATCTGAATCCGGCCGTCACATTTGGACTGGCCATCGGAGGCAACATCACAATCATAACT  
GGCATTCTTCTATTGGATTGCCAGTTGCTTGGTTCCACTGTTGCATGCCTTCTCCTCAAATTCGTCCTAATGGC  
TTGGCCATTCCCCTCATGCAGTTGCTTCTGGAATGAATGCTGTGGAGGGTGTAGTAATGGAGATTGTCATCACT  
TTTGCTCTAGTCTACACAGTCTATGCCACTGCAGCAGACCCCCAAAAAGGGCTCATTGGGCATAATTGCACCCATT  
GCAATTGGGTTTATTGTTGGTGAAACATTTTAGCTGCTGGCCCATTAGTGGTGGATCAATGAACCCGGCCAGA  
TCATTTGGGCCGGCCGTTGCTGCTGGAGACTTCTCTCAGAACTGGATCTATTGGGTTGGCCCATTATTGGGGGA  
GGATTGGCAGGCCTGGTCTATGGTTATGTTTTATTGCATCATATGCCCCATTCCCAGCCCAAGAGGGATATGCTTAA

>OeuTIP2;4\_Oeu002329.1

MVKMTLGSIGDSFVPSLKAYLAEFIATLLFVFAGVGSIAIYNKLTSDAALDPPGLVAVAVAHAFALFVGVSMAA  
NVSGGHLNPAVTFGLAIGNITIITGIFYWIAQLLGSTVACLKLLKFVTNGLAIPHAVASGMNAVEGVVMEIVIT  
FALVYTVYATAADPKKGLGIIAPIAIGFIVGANILAAGPFSGGSMNPARSFGPAAVAGDFSQNWIIYWVGPLIGG  
GLAGLVGYVFIASYAPFPAQEGYA\*

## OeuTIP2;5 Oeu040207.1

**Observation:** Intron 3 converted in exon

>OeuTIP2;5\_Oeu040207.1 | chr19:9881246..9883023 forward original version

ATGGTGAAGATTAATTGGGGTAGCATTGGCGACTCTTTTTTCGGTTACGTCGCTAAAGGCTTACATTGCTGAGTTC  
ATTGCTACCCTTCTCTTTGTTTTGCTGGTGTGGTTCTGCTATAGCTTATAGTAAGTCATCTTTTATGTTTTGC  
TAGAGTATATACACAAGTAATTCGGTCTATATTTAGTCTCTATCTGGTGGGATTTTTAGTAGATTTTGATAAAT  
GTTGATAAAATATGTGTTGAAAAGTGATGAGTGTTATAAATGTGTTGTTAAATTAATGTTGATTTAGTTT  
AGATTAATTTGAATTTCAATTTTATCTCGTACAGGCGCTCAGATAGTTGACCATAAGCCCAATAAAGGAGGAT  
CGTTGCAATAGATAAACCATAAGAATAAAAAAGGTTTTAGGCTTAGGTGTACTAATATATGGAGTATGATTGATGTT  
TGCAGACAAGCTCACGTCTGATGCAGCTCTCGACCCACCCGGTTTGGTGGCAGTCGCGGTGGCTCACGCATTTGC  
ATTGTTCTGATAGGCGTTTCCATGGCGGCCAATGTGTCCGGTGGTCATTTGAATCCGGCTGTACATTCGGATTGGC  
CATCGGAGGCAACATCACCATCATAACTGGCCTTTTCTATTGGATTGCACAATTGCTTGGTCTATTGTTGCATG  
CCTTCTCCTCAAATTTGTACCGGTGGCTTGTAAGTTATACCAAGATTAAAATTAACCTTATTTTGAGGGTAAA  
GCACTAAAATTGCTCATTTTGGATCTTTAGAGCCTTTCGCGATAAGAAAAATACTCATCTTTTGGATTAACTGC  
ATGTTGAAGCTTATTTTTAATTATTTCTGATTGATATAAGATAGAAAACAGCTTGTCTACTCTGATGTTGGACC  
AAAACAAGTCATAATTTATGTAAAATCGACTTCTAAATTGAAACGTCAACTCAATTCATTATAGGTTTCGTTAAGC  
TTTAATAACTGAGGTCACAAGAAATTACTCAAATTTGTTTGGAGTAGTTTCGTGTTTCGACTAGACAAAAACCTTACAA  
AACATCACCTGATACATTAAAGACTGGAGTTCAAGTATTTCAATTGAATTAGCATTTAAATTTACTCGAATTTGA  
GTAGTTTTACCCTTTGTTTGAACCCCATTAATTAATTAATTAATTTCTCTCTCTCTCTTTTATCAAGCATACATTTT  
TCAATAAAACAATATTACAGTAACTTAATACTTTTCTCTTATTTAACCACACATTCTTCAAAAAATTACT  
ATTCTTTTTCAATTATAATTCGAAATAATGGATCCCAACAAGGGCCTAGACTATCGCTAGATTGAATCAAGATGGG  
CTTTTGCCTGAATGTGGTAAGCCCAACCATACTAATATTTGATGTTTGGCAGGCCATTCCCCTCATGCAGTTG  
CTTCTGGTATGAATGCTGTGGAGGGTGTGTAATGGAGATTGTCATCACTTTTGCTTTGGTCTACACAGTCTATG  
CCACTGCTGCGGACCCCAAAAAAGGCTCGTTGGGCACAATTGCACCCATTGCAATTGGGTTTATTGTGGGTGCAAA  
ACATTTTAGCTGCTGGCCATTAGTGGTGGATCGATGAACCCGGCCCGATCATTTGGGCCAGCCGTTGCCGCGAG

TCGACTTCTCTCAGAACTGGATCTATTGGGTCGGCCCACTTATTGGTGGAGGATTGGCTGGCCTGGTATATGGTG  
ATGTTTTTATTGGATCATATGCCCCACTTCCAGTCCAAGAAGAATATCCT**TAA**

>OeuTIP2;5\_Oeu040207.1 **Corrected version**

**ATG**GTGAAGATTAATTGGGGTAGCATTGGCGACTCTTTTTTCGGTTACGTCGCTAAAGGCTTACATTGCTGAGTTC  
ATTGCTACCCTTCTCTTTGTTTTTGTCTGGTGTGGTTCTGCTATAGCTTATA**GTAA**GT**CA**CTTTTTATGTTTTGC  
TAGAGTATATACACAAGTAATTCCGTCTATATTTAGTCTCTATCTGGTGGGGATTTTTAGTAGATTTTGATAAAAT  
GTTGATAAAATATGTGGTTGAAAAGTGATGAGTGTTATAAAATGTGTTGTTAAATTAATGTTGATTTTAGTTT  
AGATTAAATTTGAATTTCAATTTTCATCGTACAGGCGCTCAGATAGTTGACCATAAGCCCGAATAAAGGAGGAT  
CGTTGCAATAGATTAACCATAAGAATAAAAAGGTTTAGGCTTAGGTGTACTAATATATGGAGTATGATTGATGTT  
TGCAGACAAGCTCACGTCTGATGCAGCTCTCGACCCACCCGGTTTGGTGGCAGTCGCGGTGGCTCACGCATTTGC  
ATTGTTTCGTAGGCGTTTCCATGGCGGCCAATGTGTCCGGTGGTCATTTGAATCCGGCTGTCACATTCGGATTGGC  
CATCGGAGGCAACATCACCATCATAACTGGCCTTTTCTATTGGATTGCACAATTGCTTGGTCTATTGTTGCATG  
CCTTCTCCTCAAATTTGTACCCGGTGGCTTG**GTAA**GT**TATA**CCAAGATTAAATTA**AACT**TATTTTGAGGGT**TAA**  
GCACTAAATTTGCTCATTTT**GAGAT**CTTTAGAGCCTTT**CGCG**ATAAGAAAA**ATACT**CACTCTTTTGGATTAACTGC  
ATGTTGAAGCTTATTTTTAATTATTTCTGATTGATATAAGATAGAAAA**CAGCT**TGTCTACTCTGATGTTGGACC  
AAAACAAGTCATAATTTATGTAAATCGACTTCTAAATTGAAACGTCAACTCAATTCATTATAGGTTTCGTTAAGC  
TTTAATAACTGAGGTCACAAGAAATTACTCAAATTGTTTGAGTAGTTTCGTGTT**CGACT**AGACAAAAACCTTACAA  
AACATCACCTGATACATTAAAGACTGGAGTTCAAGTATTT**CATTGA**ATTAGCATT**TAAAT**CTACTCGAATTTGA  
TAGTTTTACCCTTTGTTTGAACCCCATTAATTAATTAATTT**CATCTCTCTCTCT**TTTTATCAAGCATACATTTT  
TCAATAAAACAATTTACACGTAAACTTAAACTTTTCTTTCTATT**TAA**CCACACATCTTCAAAAAATTACT  
ATTCTTTT**CATTATA**ATTCGAATAATGGATCCCAAACAAGGGCCTAGACTATCGCTAGATTGAATCAAGATGGG  
CTTTTGCCTGAATGTGGTAAGCCCAAACCATACTAATATTTGATGTTTGGCAGGCCATTCCCACTCATGCAGTTG  
CTTCTGGTATGAATGCTGTGGAGGGTGTGTGAATGGAGATTGTCATCACTTTTGCTTTGGTCTACACAGTCTATG  
CCACTGCTGCGGACCCCAAAAAAGGCTCGTTGGGCACAATTGCACCCATTGCAATTGGGTT**CATTGT**GGGTGCAA  
ACATTTTAGCTGCTGGCCCATTTAGTGGTGGATCGATGAACCCGGCCCGATCATTGGGCCAGCCGTTGCCGCAG  
TCGACTTCTCTCAGAACTGGATCTATTGGGTCGGCCCACTTATTGGTGGAGGATTGGCTGGCCTGGTATATGGTG  
ATGTTTTTATTGGATCATATGCCCCACTTCCAGTCCAAGAAGAATATCCT**TAA**

>OeuTIP2;5\_Oeu040207.1

**ATG**GTGAAGATTAATTGGGGTAGCATTGGCGACTCTTTTTTCGGTTACGTCGCTAAAGGCTTACATTGCTGAGTTC  
ATTGCTACCCTTCTCTTTGTTTTTGTCTGGTGTGGTTCTGCTATAGCTTATAACAAGCTCACGTCTGATGCAGCT  
CTCGACCCACCCGGTTTGGTGGCAGTCGCGGTGGCTCACGCATTTGCAATTGTT**CGTAGG**CGTTTCCATGGCGGCC  
AATGTGTTCCGGTGGTCATTTGAATCCGGCTGTCACATTCCGGATTGGCCATCGGAGGCAACATCACCATCATAACT  
GGCCTTTTCTATTGGATTGCACAATTGCTTGGTCTATTGTTGCATGCCTTCTCCTCAAATTTGTCACCGGTGGC  
TTGGCCATTCCCACTCATGCAGTTGCTTCTGGTATGAATGCTGTGGAGGGTGTGTGAATGGAGATTGTCATCACT  
TTTGCTTTGGTCTACACAGTCTATGCCACTGCTGCGGACCCCAAAAAAGGCTCGTTGGGCACAATTGCACCCATT  
GCAATTGGGTT**CATTGT**GGGTGCAAACATTTTAGCTGCTGGCCCATTTAGTGGTGGATCGATGAACCCGGCCCGA  
TCATTTGGGCCAGCCGTTGCCGCAGTCGACTTCTCTCAGA**ACTGGAT**CTATTGGGT**CGGCC**CACTTATTGGT**GGA**  
GGATTGGCTGGCCTGGTATATGGTGATGTTTTTATTGGATCATATGCCCACTTCCAGTCCAAGAAGAATATCCT  
**TAA**

>OeuTIP2;5\_Oeu040207.1

MVKINWGSIGDSFSVTSCLKAYIAEFIAITLLFVFAGVGSIAYNKLTSDAALDPPGLVAVAVAHAFALFVGVSMAA  
NVSGGHLNPAVTFGLAIGNITIITGLFYWIAQLLGSIVACLLLKFTVGGLAIPHAVASGMNAVEGVVMEIVIT  
FALVYTVYATAADPKKGLGTIAPIAIGFIVGANILAAGPFSGGSMNPARSFGPAAVAVDFSQNWIIYWGVLIGG  
GLAGLVYGDVFIGSYAPLPVQEEYP\*

**OeuTIP3;1 Oeu038387.1**

>OeuTIP3;1\_Oeu038387.1 | chr10:29024107..29025120 forward

**ATG**CCTCGTGGGTATACTTTTGGTAGGGCTGAAGAAGCCACCCACCCCGACTCTGCCAGGGCCACCTTGGCTGAG  
TTTCTCTCCATGCTCGTCTTTGTCTTCGCCGCGAAGGCTCCGTCTTGCTCTTG**GTATCT**TAA**TTCTTCAGTAA**  
CGTTCTTGAATAAAGAAGAAGTAGGTGCACATGGACGTACAGCTCATATTATTCTCAATTTGTATCGATTTGCA  
GATAAGATGTATAAGGATACAGCCTTAGGAGCATCAAGCCTGGTGGTCATCGCTCTCGCCACGCCCTGTCACTG  
TTTGAGCTGTGGCTTCGAGTATGAATGTTTCCGGCGGGCACGTCAATCCTGCCGTCACTTTCGGCGCACTTGTA  
GGGGGAAGAGTCTCTGTGCTGCGTGCTATTTACTACTGGATTGCTCAACTTTTGGGTGCAGTTT**AGCTG**CTATC  
TTGTTGAGGCTGGCAACTGATGGCTTG**GTAAAA**AGAAATAGAAAA**ACCCCGCTTCCACCT**TAA**TTAATTAC**  
TTGCATGTCTCAGCACATGTTTTGGTGTGTTTATAAGTGCTTATAAGTACCGGGACTTTCTACTCGTTTT**TAATA**  
AGCATCCTGTGTTTGCAGAGGCCGCGAGGGTTTTCCGTGGCGGATGGAGTAGGAGAATGGAACGCTTTGGTGATG  
GAGATTGTGCTGACATTTGGACTGGTATATACAGTGACGCGACTGCAATCGATCCAAAAAGAGGAAGCTTTGGGC  
ACCATTGCTCCTCTTGCCATTGCCTTCATAGTTGGGGCTAATGTGCTGGTTGGAGGGCCTTTCTCCGGAGCATCG  
ATGAACCTGCTCGTGCTTCGGGCCAGCACTTGTGGGATGGAGGTGGAAGACCCTGGGTCTACTGGTTGGGA



CCATTTCGTTGGTGCGGCTCTGGCTGGAGTTATATACGAGTTCGGGGTGATACAAACCGAGACCCCGCACCCCACG  
CATCACCTTCACCAGCCTTTGGCCCCAGAAGATTAC**TAG**

>**OeuTIP3;1\_Oeu038387.1**

**ATG**CCCTCGTGGGTATACTTTTGGTAGGGCTGAAGAAGCCACCCACCCCGACTCTGCCAGGGCCACCTTGGCTGAG  
TTTCTCTCCATGCTCGTCTTTGTCTTCGCCGGCGAAGGCTCCGTCTTGCTCTTGATAAGATGTATAAGGATACA  
GCCTTAGGAGCATCAAGCCTGGTGGTCATCGCTCTCGCCACGCCCTGTCACTGTTTGCAGCTGTGGCTTCGAGT  
ATGAATGTTTTCCGGCGGGCAGTCAATCCTGCCGTCACTTTCGGCGCACTTGTAGGGGGAAGAGTCTCTGTGCTG  
CGTGCTATTTACTACTGGATTGCTCAACTTTTGGGTGCAGTTTTAGCTGCTATCTTGTTGAGGCTGGCAACTGAT  
GGCTTGAGGCCGCGAGGGTTTTCCGTGGCGGATGGAGTAGGAGAATGGAACGCTTTGGTGATGGAGATTGTGCTG  
ACATTTGGACTGGTATATACAGTGTACGCGACTGCAATCGATCCAAAAAGAGGAAGCTTGGGCACCATTGCTCCT  
CTTGCCATTGCCTTCATAGTTGGGGCTAATGTGCTGGTTGGAGGGCCTTTCTCCGGAGCATCGATGAACCCTGCT  
CGTGCGTTCGGGCCAGCACTTGTGGGATGGAGGTGGAAGACCCTGGGTCTACTGGTTGGGACCATTCTGTTGGT  
GCGGCTCTGGCTGGAGTTATATACGAGTTCGGGGTGATACAAACCGAGACCCCGCACCCCACGCATCACCTTCAC  
CAGCCTTTGGCCCCAGAAGATTAC**TAG**

>**OeuTIP3;1\_Oeu038387.1**

MPRGYTFGRAEEATHPDSARATLAEFLSMLVFVFAGEGSVLALDKMYKDTALGASSLVVIALAHALSIFAAVASS  
MNVSGGHVNPVAVTFGALVGGRVSVLRAIYYWIAQLLGAVLAAILLRLATDGLRPRGFSVADGVGEWNALVMEIVL  
TFGLVYTVYATAIDPKRGSGLTIAPLAIAFIVGANVLVGGPFSGASMNPARAFGPALVGWRWKDHWVYWLGPVVG  
AALAGVIYEFVGIQTETPHPTHHLHQPLAPEDY\*

## **OeuTIP4;1 Oeu030229.1/Oeu036364.1**

**Observation:** Oeutip4;1 was generated after combination of 2 scaffolds :

|             |                                    |
|-------------|------------------------------------|
| Oeu030229.1 | scaffold25131:282..785 reverse     |
| Oeu036364.1 | scaffold311:586778..587098 forward |

>**OeuTIP4;1 Oeu030229.1/Oeu036364.1**

**ATG**GCTAAGATTGCCTTGGGAAATGCCCCGAGAGGCCTTTCAATCGGACTGCATCCAGGCCCTTATTGTGGAATTC  
ATTTGCACGTTTCTTTTCGTGTTTCGCCGGGGTCGGCGCTGCCATGGCTACCG**ATAATGTCTTGAGTTTCCTCATT**  
**TAAATTTCTATTTTCAACTACATGTCTTCGATATGGTAACCTTTTAAACAGATAAGCTGAATGGGGATCCGTTGGTG**  
**GGACTATTTTTTGTGGCTATGGCACATGCGTTGGTGGTGGCGGTGATGATTTTCAGCCGGATTCCGCGTTTCCGGT**  
**GGCCACATAAACCTTGCTGTACCCCTCGGCCTATTAGCAGGCGGCCATATCACTGTCTGTCAGATCAATCCTCTAC**  
**TGGATTGATCAGTTATTAGCTTCTACAGCAGCTTGTGCTCTGCTCAAGTACCTAACTGGAGGATTG**TTAGTATT****  
**AGTATATCTTTGCCTTATACGAATGCACTCAGTTTTGTCTTTAAAGACGCATAATCCTAAAAAAATTTGAAATCT**  
**CGTTTCATTCACCTTCGGCTTCCCATCTTAATGATCTCGGTTAGTCAAGTAAAGTGACGTAGAGAGCGACTTCTAA**  
**ATTGTTGGCCCCAAGTGGTGAATGTGACCCGGTTTGGCCCCCTTGCTCTATCTCGCATTTACTTAATACACAAC**  
**TTATTGAGCGACTGAGATGATGACACATGTTGCTAGTTGAACGTGTTGGATGCATTATGACCTTTCATATTCTAGT**  
**CTCTCTCCTTTTTTTGGGTTCAAGATTATTGTAGGTTTCCCGACTCTATTTGTCTTTATGATTTCTCTCTCTAAA**  
**AACCCTTGATTTTCATTTGTAATCTTGAATCTTATTGTAATCTCGGTGGTGTCCAATATAAATCATGTTATGGTT**  
**AGAATTTTATTTTTCTTGGGTGAACTGCAACTCTTGGTTACGTGGTGTAACTGTAAACGAGAGAAAAAGTGAGA**  
**GTTGAGTCTGAGGGCTTTAAGTCGAGTGATTTTTGAGTATCTGATTCTTGTATTTTGACACAATTTGTTGGATTCT**  
**TAGAGGATTAGAACGTTAACCCTTAGGTGGATGCTCAACGTGGTGAGTAGCCGCCATTCTTGGGTGAACATCT**  
**GGGCCTACGAGCGAAAAATCTTTATGTTCTCTGTGTTTGATTTACTTGAATAAATTTTGGGATTGTTAGATACCA**  
**ACAGTGGTATCAGAGCTGCTCAATCTGTGTTGGAAGCCTTCGGTCTGAATATTTCTGGTGCTCTTGGTGACCAAA**  
**ACTCTAGATCTTCACAGATTTGTATTTTTAAGGGCTTGATTTTCATTAATTTCTAAGAAAGTAAAAATAGTTTTGA**  
**TATTCATATTTAGTGTCTTAAGACGTGTTGGTAACGAGTTTCTAAACCCTATTTCTTCTTTAAACTTGCATA**  
**TCTTGGTTGAAACTCACCTGCTCTTTCTTTGTCTAGGGTTTCATGCGACCTAGAATCTGAGGGAACGATGTTTA**  
**ACGGTTTCTTTCAAGATTATTGTTTATCCGTGATTCTGATATTTGTACTTTATGATTGGGTATTTGTTGTGATC**  
**TGCCCTTCTCTGATTTGCATATTGGTGTATTTGCGTGGACACTATTGCACATTATCACTTTGTGCGTATATCTCTG**  
**TGAATAAATTGTGTCTTAGTTTTGTGTACTTTAGACTTTATACCGAAATTTTTTAAAAATCATGGGAAGTACCAA**  
**AATTGATATTGAGATATGGTATGGCAATGAAGACTTTAGTCTCTGGAGTAAAAAAATGAAGGCCCTTTTAGTACA**  
**ACAAAGATGTGTAAAGCTATAGATGAATCATGGGGTACAAAAGTTACTGAAAAATAGGAGGACTGATCAAGATAA**  
**AATTGCATGGAGTACAATTTTCTTGCAATTTATTTGAAAGTGTGATTAGAGAGGTAGAAAAAACTAAGACTGCAAT**  
**AGAAATCTAGACAAAGCATGATTTTCTTTATCAAACCTAAGACCCTTCCCAACAAATGTTACTTGTGGAACAATT**  
**TTTCTGTTTCAAATTTGACCCTAATTGTGATCTTGAAGTTAATCCTGATAGATTTAATAAACTCTTTCAAGATAT**  
**CACTAATGGTGGTAAGACTTTATCTGATGATAAAAAATCTGTGGCCCTACTGTCAATTTTACCTGAGAAATTTAA**  
**AGAAGTGAAACATCCCCTTGAATATGAAAGAAGTACTGTACAGTTAATGATATTATGACTTCTTTAAGGAATAA**  
**GGAACATGAAGTAAAGAGTGATTCAAAAACCTCCATAACTGGAGTAGGTTACAATATAAAAGGTACTAATTCCTTC**  
**AAGAAGAAGAATAATCAATATATGAATAAAAAATTTGGGAAACCAAAAGAATATTATAGTACATCTCAAAAGGGT**  
**AAGTCAAAATTTAATTAGAACAACAGTAAGGCTAAAGATAGGAAGTGTTACTTTTGTGAAAAATGGGCCACTAC**

ATCCAAGATTGTATGAAAAGAATTGAGGAACTGCAAAATGCAAAATAAGGTTGAAGGTGAAGCTGCTATAGCTTAT  
GAAGAAACAACAACCTCAAATGGACAAGTTTATCTGACTTCTCAACCCATAGTCAAAGATGACTGGATACTAGAC  
TCTGGATATACTTTCCATATGCCACCCTAATAGAGCTCTTCACTGAATTTTATGAAAACAAGTGGAGGACAAGTAA  
CTATGAGAAATGATTTTTCGTGCAAGATTAAAGGAATTGGAAAGATTGTTTTAAAACTAGACAATGGGAATGTAC  
TAACCTCAAACAAAACCTAGATACACTCCTAACTTAAAGAGAAAACCTTAATCTCTTTGGGCACACTTGATGATGAAG  
GTTTTAATACAATCATAAATAAAAGTGTTTTGACACTCCAAAATAATCTTGCTAATATCATTTAAGTAGAAAAAT  
CAAATTGGATATATGTCATGAAAGCTATATCACATAAAAAATCAATTTATTGCTGCTACTGTCTCCCTGCTTGACA  
AATCTAAAATATGGCATAAAAGGTTAAGATCCATAAGTGATAAAAAATCTGCATGTCCTTAAAAAACAAAGGTCTCT  
TGGAAAATGATAAAATTGAAAGAGTGTCAATTTGTAAACATTGCATCTATGGAAAGCAGAAAAAAATTACCTTTTTA  
CTACTGGTACCCATAAATCTAAAGTTGTTCTTGATTACTTACATGCTGACCTGTGGGGGCCAACTTCTGTAAAGTA  
CTTATTCTGGTTTTTAAATACTATTTCTGATTGTTGATGATTTTCAAGGAAAAATTGGGTATGTTCTTGAAAAA  
TAAATCTGATACCTTGCAAACTTTGTTTCTTGGAAGCTCTTGTTGAAAATCAAGTTAAACAAGAAGGTTAAAGC  
TCTTAAAACTGATAATGGCCTTGAATTCGCAATGAAGAATTTGATAAGTACTTCAGAGATAATGAGATCCTTAG  
GCATGAGACTGTCACCTTACACACCACAATAGAATGGACTCGCAGAAAGAATGAATAGGACCCCTTCTAAAAAGAAT  
CAGGTGCATGTTGATAAGTTCAGGTCTTTCAAAGTTATTCTAGGGGAGGCAGCTAAAAACTGCCTCATGTATGAT  
AAATAAATCTCCCACTAAATCCCTGAATTATGATACCCCTGATCATACTTTGAAATGGACATTTTATTGGCTATT  
CCAAAATTTAAATTTTTGGTTGTATTACTTATGTACGCTAAAGTGAAGGGAAGCTTCAGCCAAGATCTATAAAAG  
GTGAATTATTAGGATATGGGGAAGGCATAAAAGGATATAGAATCTGGTTGAGAGGTGAGGAGGATATGGAGTTG  
TAATAAGCAGAAATGTAGTCTTTAACGAATCAGATATGCGCTGCATTAAGAAAAAATCAACTGTTGACACAGATT  
ATGATCAAAACAGGTACTTTTATGCAAACTGAACCTTTTCCGACTAACATGACCCCTTGAAATGAGGATCAGAGTG  
GAGCCTGGATTAGAGCAAGGCATAGAACTTGAAGTACAGCTACAGGTTCTTTAGAAGACTATCATTTGGTT  
AGGGACAGAATAAGAAGAGAAATAAGGCCTCCCTGAGATATAAAGAACCTGACTTTATTACTGCACTAAATGTT  
CAAACTTATTGAAAATGAACCTGTAACTATGAAGAAGCAGTTAAGAGTAAAGACTCAAACCTTGGCAGACA  
ACCATGGAAGAAAGATGCAGTCTTAAATGAAAAATAAACTTGGGTCTAGTAAATAAACCAAAAGGGGAAAT  
ATTGAATTCAAACGGATTTATAAGATAAAGGAAGGTGATCCTTTAACTGAAAATGTTAGGTTTAAAGCCAGATTA  
GTTGCTAAAGGTTTTTAACCAAGAGATGGAATTAACACAATGAAATTTTTCCCGAGTAGTCAAGTAAACCTCTA  
TAAGAATTTTACTTTCACTTGTTTTCGTAATTTGATTTTTAATTGGAATAATTGGACGTGAAAACTGCCTTTTTTAC  
ATAGAAATTTACATGACTCAACCAAAAAGTTTTGAACAAAAGGGGAAAGAAAACTGTGTGTGTTTATTGCAAGAA  
TCTCTTTATAGTTTTAAACAACCACCAAGACAATAGTACATCAGATTTGATACCTTTTATCAACAGTCTTGATTTT  
AATAGAAGTGAATATGATCCATATTTTTATTATAAAGGAAGTAGAGGTCCAAATCTTGTTATTTACTGATTTAT  
GTGGATGATATGTTTCTTGCTGAATGTGATGTAACATAAAATAACATTAAGCAAAAGTTAAAGCAAGAATTT  
GAGATGAAGGACTTAGGATCAACCAAAAGGATTTGGGTATGGAGATTAAGGAGGATAGTATTAATTATACCTTG  
TTTCTCACACAGTAGTCATATATTTTTAAAAATATTGAATATATTTTTCTATGAAGAAGCTAAGGATGTCACCTTAC  
CTCTAGGTTGTCACTTTAAATTCAGTCCGAACAATGTCTTAAAACTGAAATGGAAAAGAGTAGAATGGATAATG  
TTCCTTGTGCAAATGTTATTGGTTCTGTTATGTATGTTTTAGTTTGTATAAGAAGTGATCTTGCTTTTGCTGTAA  
GTGTCTTGAGTAGATACATGAGTAACCCGGGTGAGTATCATTGAGAAACAATGAAATGACTACTTAGATACTTAA  
AAAGGACTACAAATGTAGGGCTGATGTTCAAAAATAGTAAATTTGGAATACAACCTTTAAGGTTTTGTTGATGCAG  
ATTTTGTGGAATTTGTGACAATAGAAAATCTACTCCTGCATACGTGTTTACATTAAATAATACCTTTATAAATT  
GGAAATATCAGCTGCAAAAAATAGTTCCTCTATCTCCAACAGAGGCTGAGTATATTGTTGCTACAGATGCAGTTA  
AGGAAGGTATTTGGTTGAAAAATTTATTAGATAATATTGGCTTTACTAGTAATAATGCTACAGTGTATTCTGATG  
GTCAATCTGCCATACATCTAACTAGAAACCTTGTTTTTTATAATAGGACTAAACATATAGATGTTAAATTCATT  
TTATAAGATATATTATTGAATAAGAGAATAAAGATTGAAAAGGTTTTCAACCAAGTATAACCTATGGATGGGAAC  
TAAAGTTCTCCTTTATACAAATTTAGGGCTTGTTTTAAATATCTTAAATGTTGTTACTAAGGATATTTTGTAGG  
TACATAGCTATGAAACCATAAAGGAGGATTAACCCCTAATTCAGATGAAACCTAAGAGTGTAAAGCAAGGTG  
GAGATTGTTAAAAATATGCTTAACATCTTATTATTTGAGGTCCAGTGATGTAGCCCAATAAATGTATTTCCCTATG  
GTTGGCCCATGTGGTAGAATGTGACTCGGTTTTGGCCCTAGTGCTCTATCTCGCATTTACTTAAACACGACTTA  
TTGAATGGCTGAGATGATGACACCTGTTATTGGCTGAACCGTTGGATGCATTATGACCTTTTATATTCTAGTCTC  
TCTCATTTTTCTGGGTTTGAGGGTTTCAGTCTCTACTTGTTCTTTATGATTTCTCTCTCTGAAAACCTTTGGTTTT  
CATTTGTAATCTTGAGTCTTCTAGTATTCTTGTTGATGTCCAGTGTAATCATGTTATGGTTAGAGTTTATTGT  
TCTTGGGTGAATTTGTAATTTCTTGTTACTTGGGGTAATCTGTAAACGAGAGAAAAAGTGAGAGTTGAGTTTGAG  
GGCTTTAAGTCGAGTGATTCTTGGGTTTTTGATTCTGTATTTTGACGCACTTTGCTGGGTCTAGTGATTGGA  
GTGTTAATCACTTAGGTGGATACTCAACGTGGTGATTAGTCCATTTTTGAGTGAACATCCGGACTTACAGACGAA  
ACATCTTTGTGTTCTCTGTGTTTGATTTACTCAATTTAATTTTGGGATTGTTAGATACCAACGTATTATATTCTA  
ACAAGGAACCATGTGATTTCTTGATTCTTGCAAGTATACACACTTGCAACTGGGGTGGACTTCGCC  
CAAGGGGTTATAATGGAATTTGTGTTGACATTTTCATTGTTATTCACTGTTTATGCAACAATTGTGGACCCCAAG  
AAGGGGTTCTCTTGAAGGATGGGCCCACTTCTACTGGTCTTGTTGTTGGGGCCAACGTCATGGCTGGTGGGCCA  
TTCTCAGGGGCTTCAATGAACCCTGCAAGGTCAATTCGGGCGAGCTTTGGTCAGCGGGGATTGGACCGATCACTGG  
GTATACTGGGTGGGCCACTCATTGGAGGTGGTCTTGCTGGATATATCTATGAGAACTTCTTCATTGTCAGATCT  
CATGTTCAACTGTCAGGAGAGGAAGTTTTCTAA

>OeuTIP4;1 Oeu030229.1/Oeu036364.1

ATGGCTAAGATTGCCTTGGGAAATGCCCCGAGAGGCCCTTCAATCGGACTGCATCCAGGCCCTTATTGTGGAATTC  
ATTTGCACGTTTTCTTTTCGTGTTTCGCCGGGGTCGGCGCTGCCATGGCTACCGATAAGCTGAATGGGGATCCGTTG  
GTGGGACTATTTTTTGTGGCTATGGCACATGCGTTGGTGGTGGCGGTGATGATTTTACGCCGATTCCGCGTTTCC

GGTGGCCACATAAACCCCTGCTGTCACCCCTCGGCCCTATTAGCAGGCGGCCATATCACTGTCGTCAGATCAATCCTC  
TACTGGATTGATCAGTTATTAGCTTCTACAGCAGCTTGTGCTCTGCTCAAGTACCTAACTGGAGGATTGACTATA  
CCAGTACATACACTTGAACCTGGGGTGGACTTCGCCCCAAGGGGTATAATGGAATTTGTGTTGACATTTTTCATTG  
TTATTCACTGTTTATGCAACAATTGTGGACCCCAAGAAGGGGTTCCTTGAAGGGATGGGCCCCTTCTTACTGGT  
CTTGTGTTGGGGCCAACGTCATGGCTGGTGGGCCATTCTCAGGGGCTTCAATGAACCCCTGCAAGGTCATTCGGG  
CCAGCTTTGGTCAGCGGGGATTGGACCGATCACTGGGTATACTGGGTGGGCCACTCATTGGAGGTGGTCTTGCT  
GGATATATCTATGAGAATTCTTCATTGTGAGATCTCATGTTCAACTGTCAGGAGAGGAAGTTTTCTAA  
>OeuTIP4;1 Oeu030229.1/Oeu036364.1  
MAKIALGNAREAFQSDCIQALIVEFICTFLFVFAGVGAAMATDKLNGDPLVGLFFVAMAHALVVAVMISAGFRVS  
GGHINPAVTLGLLAGGHITVVRISILYWIDQLLASTAACALLKYLTGGLTIPVHTLATGVDFAQGVIMEIVLTFSL  
LFTVYATIVDPKKGFLEGMGPLLTGLVVGANVMAGGPFSGASMNPARSFGPALVSGDWDHWVYVWGPLIGGGLA  
GYIYENFFIVRSHVQLSGEEVF\*

## OeuTIP5;1 Oeu021708.1

>OeuTIP5;1\_Oeu021708.1 | chr12:21524153..21525389 reverse

ATGCGCTCCTTAAAATCCCGTTTGGAGCACACTGTTACACCCACTGCCCTCAGATCGTATCTTGCAGAGTTCATT  
TCCACATTCTTCTTCGTCTTCGCTTCTGTTGGAGCCACAATGTCCACGCGTAAGTTTTTCATTTTCTTGTTTCATC  
AAAGGGTTGGAACCACAATACCAGTGACGAAAATGGGTTAAAATCGACCCCATATTTGTTAAAAATTTGATTTC  
AATTGATTGTTTTAATAGGGCTTAGTTTGTATTGTTTTGCTTCAATATGATTCAATTGTTTCGTACCTGTGTCGTG  
ATTACAGTGAAAATGATGCCGGATGCAGCATCAAATTTCTTCCGGTCTGGTAGCTATTGCAGTTGCAAAATGCCTTT  
GCATTATCAGTAGCAGTGACATTGCTTATAATATCTCCGGTGGCCATGTGAATCCGGCTGTTACATTTGGAATG  
GCTATCGGAGGCCACATAAGCATTCCGATGGCCATTTTCTACTGGATTTCTCAGACCCCTCGGCTCTGTCATAGCT  
TGCATTCTCTTAAAAGTGACCACTGTTGGACAGTACTAAGAGTTGTAAATGCTTTAGAATGTACAGTCAAATGG  
GTAAAGCCACGTTGCCCTGAAAGATATTAACAGGTTTCTTGACATAATGGGTGTTGACAAGATATGATTGAATGAA  
AAAGTTTACTGTTTTAAACAATCTATTAATAGAATGTTATGTGACATTATGTCAATGATTATATCAACATCTATA  
GCACTGTAACATGATTGTCACTGGACACGACACTATCCGTTTGTGCATCTCTTTCTAGCAATGATCTCAAGAGTC  
TTTTCTTCTTATTTTCATTTTTTGACGACGTTTCCAACGCACTCAATTCCACAAGAAATGACCGGTTTTTGGTGCAGC  
CATACTGGAAGGCGTGATGACATTTACATTGGTGTACACTGTATATGCTGCTGCTGATCCGAGGCGAGGTTCCAT  
GTCAATAATTGGCCCGTTGGCCATAGGGCTGGTGTGAGGGCTAACGTAAGTACTGGCATCGGGACCTTTTACCGGTGG  
CTCAATGAACCCCGCTACTCCTTCGGTTCTGCACCTGTTGGAGGAAGTTTCAAGAATCAAGCAGTCTATTGGAT  
TGGACCATTGATTGGAGCAGCCACTGCAGGAATTTTATATGAGCATGTAGTTTTCCCTGCTCAACAAGAGCCTGA  
TTCATTGAGGGGAATTCCTCATGGAGTTGAATTTTAA

>OeuTIP5;1\_Oeu021708.1

ATGCGCTCCTTAAAATCCCGTTTGGAGCACACTGTTACACCCACTGCCCTCAGATCGTATCTTGCAGAGTTCATT  
TCCACATTCTTCTTCGTCTTCGCTTCTGTTGGAGCCACAATGTCCACGCTGAAAATGATGCCGGATGCAGCATCA  
AATCTTTCGGTCTGGTAGCTATTGCAGTTGCAAAATGCCCTTGCAATTATCAGTAGCAGTGACATTGCTTATAAT  
ATCTCCGGTGGCCATGTGAATCCGGCTGTTACATTTGGAATGGCTATCGGAGGCCACATAAGCATTCCGATGGCC  
ATTTTCTACTGGATTTCTCAGACCCCTCGGCTCTGTCATAGCTTGCATTCTCTTAAAAGTGACCACTGTTGGACAG  
CACGTTCCAACGCACTCAATTCCACAAGAAATGACCGGTTTTTGGTGCAGCCATACTGGAAGGCGTGATGACATTT  
ACATTGGTGTACACTGTATATGCTGCTGCTGATCCGAGGCGAGGTTCCATGTCAATAATTGGCCCGTTGGCCATA  
GGGCTGGTGTGAGGGGCTAACGTAAGTACTGGCATCGGGACCTTTTACCGGTGGCTCAATGAACCCCGCTACTCCTTC  
GGTTCTGCACTTGTGGAGGAAGTTTCAAGAATCAAGCAGTCTATTGGATTGGACCATTGATTGGAGCAGCCACT  
GCAGGAATTTTATATGAGCATGTAGTTTTCCCTGCTCAACAAGAGCCTGATTCAATTGAGGGGAATTCCTCATGGA  
GTTGAATTTTAA

>OeuTIP5;1\_Oeu021708.1

MASLKSRLHTVTPTALRSYLAEFISTFFFVFASVGATMSTLKMPDAASNSSGLVAIAVANAFALSVAVYIAYN  
ISGGHVNPAVTFGMAIGGHISIPMAIFYWISQTLGSVIACILLKVTTVGQHPVTHSIPQEMTGFGAAILEGVMFT  
TLVYTVYAAADPRRGSMSIIGPLAIGLVSGANVLASGPFTGGSMPNAYSFGSALVGGSFKNQAVYWIGPLIGAAT  
AGILYEHVVFPAQQEPDSLRLGIPHGVEF\*

## OeuTIP5;2 Oeu021709.1

>OeuTIP5;2\_Oeu021709.1 | chr12:21526411..21527647 reverse

ATGCGCTCCTTAAAATCCCGTTTGGAGCACACTGTTACACCCACTGCCCTCAGATCGTATCTTGCAGAGTTCATT  
TCCACATTCTTCTTCGTCTTCGCTTCTGTTGGAGCCACAATGTCCACGCGTAAGTTTTTCATTTTCTTGTTTCATC  
AAAGGGTTGGAACCACAATACCAGTGACGAAAATGGGTTAAAATCGACCCCATATTTGTTAAAAATTTGATTTC  
AATTGATTGTTTTAATAGGGCTTAGTTTGTATTGTTTTGCTTCAATATGATTCAATTGTTTCGTACCTGTGTCGTG  
ATTACAGTGAAAATGATGCCGGATGCAGCATCAAATTTCTTCCGGTCTGGTAGCTATTGCAGTTGCAAAATGCCTTT  
GCATTATCAGTAGCAGTGACATTGCTTATAATATCTCCGGTGGCCATGTGAATCCGGCTGTTACATTTGGAATG

GCTATCGGAGGCCACATAAGCATTCCGATGGCCATTTTCTACTGGATTTCTCAGACCCCTCGGCTCTGTCATAGCT  
TGCATTCTCTTAAAAGTGACCACTGTTGGACAGGTACTAAGAGTTGTAAATGCTTTAGAATGTACAGTCAAATGG  
GTAAAGCCACGTTGCCTGAAAGATATTAACAGGTTTCTTGACATAATGGGTGTTGACAAGATATGATTGAATGAA  
AAAGTTTACTATTTTAAACAATCTATTAATAGAATGTTATGTGACATTATGTCAATGATTATATCAACATCTATA  
GCACTGTAACATGATTGTCACTGGACACGACACTATCCGTTTGTGCATCTCTTTCTAGCAATGATCTCAAGAGTC  
TTTTCTTCTTATTTTCATTTTTCGAGCACGTTCCAACGCACTCAATTCCACAAGAAATGACCGGTTTGGTGCAGC  
CATACTGGAAGGCGTGATGACATTTACATTGGTGTACACAGTATATGCTGCTGCTGATCCGAGGCGAGGTTCCAT  
GTCAATAATTGGCCCGTTGGCCATAGGGCTGGTGTGAGGGGCTAACGTACTGGCATCGGGACCTTTTACCGGTGG  
CTCAATGAACCCCGCTACTCCTTCGGTTCTGCACTTGTGGAGGAAGTTTCAAGAATCAAGCAGTCTATTGGAT  
TGGACCATTGATTGGAGCAGCCACTGCAGGAATTTTATATGAGCATGTAGTTTCCCTGCTCAACAAGAGCCTGA  
TTCATTGAGGGGAATTCCTCATGGAGTTGAATTTTAA

>OeuTIP5;2\_Oeu021709.1

ATGGCGTCCTTAAAATCCCGTTTGGAGCACACTGTTACACCCACTGCCCTCAGATCGTATCTTGCAGAGTTCATT  
TCCACATTCTTCTTCGTCTTCGCTTCTGTTGGAGCCACAATGTCCACGCTGAAAATGATGCCGGATGCAGCATCA  
AATTCCTCCGGTCTGGTAGCTATTGCAGTTGCAAATGCCTTTGCATTATCAGTAGCAGTGATACATTGCTTATAAT  
ATCTCCGGTGGCCATGTGAATCCGGCTGTTACATTTGGAATGGCTATCGGAGGCCACATAAGCATTCCGATGGCC  
ATTTTCTACTGGATTTCTCAGACCCCTCGGCTCTGTCATAGCTTGCATTCTCTTAAAAGTGACCACTGTTGGACAG  
CACGTTCCAACGCACTCAATTCCACAAGAAATGACCGGTTTGGTGCAGCCATACTGGAAGGCGTGATGACATTT  
ACATTGGTGTACACAGTATATGCTGCTGCTGATCCGAGGCGAGGTTCCATGTCAATAATTGGCCCGTTGGCCATA  
GGCTGGTGTGAGGGCTAACGTACTGGCATCGGGACCTTTTACCGGTGGCTCAATGAACCCCGCTACTCCTTC  
GGTCTGCACTTGTGGAGGAAGTTTCAAGAATCAAGCAGTCTATTGGATTGGACCATTGATTGGAGCAGCCACT  
GCAGGAATTTTATATGAGCATGTAGTTTCCCTGCTCAACAAGAGCCTGATTCATTGAGGGGAATTCCTCATGGA  
GTTGAATTTTAA

>OeuTIP5;2\_Oeu021709.1

MASLKSRLHTVTPALRSYLAEFISTFFFVFASVGATMSTLKMMPDAASNSSGLVAIAVANAFALSVAVYIAYN  
ISGGHVNPAVTFGMAIGGHISIPMAIFYWISQTLGSVIACILLKVTTVGQHPVTHSIPQEMTGFGAAILEGVMTF  
TLVYTVYAAADPRRGSMISIIIGPLAIGLVSGANVLASGPFTGGSMNPAYSFGSALVGGSFKNQAVYWIGPLIGAAT  
AGILYEHVVFPAQQEPDSLRLGIPHGVEF\*

OeuTIP5;3 Oeu022479.1

>OeuTIP5;3\_Oeu022479.1 | chr1:6772133..6773251 reverse

ATGGCTTCTCTGAAATCCCGTTTGGAGCATTACAGTCACTGCCATTGCTCTTAGATCGTATCTTGCTGAGTTTATC  
TCTACATTCTTCTTCGTCTTTGCTGCTGCTGGGGCAACAATGTCTTCGCGTAAGCCAATTTTCTTCATTTTAAAT  
TTGGAAATTAATTGTTAATCCATTTTCGTTTGATCATGGATCGTACCTTTTCCCTTTACATGATTTTTTAATGATG  
TTTATTGATGTATATAAAACAGGGAAATGATGCCGGATGCAGCATCGGATTCCTCGAGTCTTGTTGCAATTGCA  
GTTGCGAATGCGTTTGCAGTGTACAGTGTATATTTCTGCCAATATTTCCGGGGGCCACGTGAATCCGGCT  
GTCACATTTGGAATGGTTGTGGGAGGCCATATTAGTATTCCTATGGCTATTTTCTATTTCGATTTCGCAAACGTTT  
GGTCTGTGCATGGCATGCCTGCTATTAAAAGCAACCACCGCAGGACAGGTACGTCACCTCAAAGTCCCAATGAGTA  
CCGCGTACTAAATGCATCAAAAATTGATTAAATGTGTGTCTGAGTGTAAAGATAAACAGACAAAAGTTTGATTAC  
CCGACTAATTCTACTGATTACAACATACTAAACATGCCACTATCGACTACCCATCAGATGTACAGATGGAAAAGTT  
GCATCTTGGTGACTCAAATATCACATTATCTTTAACAGATACTTCATAATTGTTTTGCAGCATGTTCCAACCTCAT  
GCAATAGAACATGAGATGACTGGTTTTGGAGGAGCAGTGCTAGAGGGTGTTATGACTTTTGCATTGGTGTACACG  
GTTTATGTAGCCTCGAACCTGAGGCCGGTTTCTGCCGGTGCCATCGGCCCTTGGCAATTGGGCTTATTGCGGGG  
GCTAACGTTCTTGCATCAGGACCGTTTACCGGTGATCCATGAACCCGGCATAACGATTCCGTTTCAGCCATTGTT  
GGAGGGAGTTTTTAAGAATCAAGCAGTATATTGGGTTGGACCATTGTTTGGCGCAGCCATTGCTGGGATTTTACAT  
GATAATGTAGTCTGTCTGCTCCAGTGCCTGATTCTTTAGGGGGAATGCTGATGGAGTGGGAGTTTAA

>OeuTIP5;3\_Oeu022479.1

ATGGCTTCTCTGAAATCCCGTTTGGAGCATTACAGTCACTGCCATTGCTCTTAGATCGTATCTTGCTGAGTTTATC  
TCTACATTCTTCTTCGTCTTTGCTGCTGCTGGGGCAACAATGTCTTCGCGGAAAATGATGCCGGATGCAGCATCG  
GATTCCTCGAGTCTTGTTGCAATTGCAGTTGCGAATGCGTTTGCAGTGTACAGTGTATATTTCTGCCAAT  
ATTTCCGGGGGCCACGTGAATCCGGCTGTACATTTGGAATGGTTGTGGGAGGCCATATTAGTATTCCTATGGCT  
ATTTTCTATTTCGATTTTCGCAAACGTTTGGTTCTGTGCATGGCATGCCTGCTATTAAAAGCAACCACCGCAGGACAG  
CATGTTCCAACCTCATGCAATAGAACATGAGATGACTGGTTTTGGAGGAGCAGTGCTAGAGGGTGTTATGACTTTT  
GCATTGGTGTACACGGTTTATGTAGCCTCGAACCTGAGGCCGGTTTCTGCCGGTGCCATCGGCCCTTGGCAATT  
GGGCTTATTGCGGGGGCTAACGTTCTTGCATCAGGACCGTTTACCGGTGATCCATGAACCCGGCATAACGATTTC  
GGTTCAGCCATTGTTGGAGGGAGTTTTAAGAATCAAGCAGTATATTGGGTTGGACCATTGTTTGGCGCAGCCATT  
GCTGGGATTTTACATGATAATGTAGTCTGTCTGCTCCAGTGCCTGATTCTTTAGGGGGAATGCTGATGGAGTG  
GGAGTTTAA

>OeuTIP5;3\_Oeu022479.1

MASLKSRLHSVTAIALRSYLAEFISTFFFVFAAAGATMSSRKMPDAASDSSSLVAIAVANAFALSVTVYISAN  
ISGGHVNPAVTFGMVVGHHISIPMAIFYSISQTFGSVMACLLLKATTAGQHPVTHAIEHEMTGFGGAVLEGVMTF

ALVYTVYVASNLRPVSAGAIGPLAIGLIAGANVLASGPFTGGSMNPAYAFGSAIVGGSFKNQAVYWVGPLFGAAI  
AGILHDNVVCPAPVPDSFRGNADGVGV\*

## OeuTIP-related, considered as Pseudogenes

### Oeu050612.1 OeuTIP2;1-related

>Oeu050612.1 | chr18:23502061..23503102 forward  
Incomplete sequence

>Oeu050612.1

ATGGCTGTCCGCCATGGATTTGCTCTGTTTGTGGCAATTTTCGTCGGAGCCAAAATCTCCGGTGGCCATGTAAAC  
CCTGTTGTACCTTTTGTTGGCTGTTGGTGGCAAATCACTGTTCTCACTGGCCTCTTCTATTGGATTGCTCAACT  
TTTGGGCTCCATTGTAGCATGCTTCTTGCTCAAAGTTGTCACAGGTGGCTTGTAAGTTAGTTTATTTTCCACA  
ATAATGTTACTCTTGAAATAATTTTTTCTCGCTCACTCCAAATGTGAGAGAGCGGAAAATATTATGCCCTATT  
TGGTTGTATTAAAAAATTGATTAAAAATTTAAATCAAAGTCAACTATTAATTCATGGTACACAAAATTTTTTAATT  
ATACATTCATTATTTTTTATCAAATCTACTAAATCTGATTATTAATAATCATAACAGCAGTTATTTCTTTCA  
TGCATCTAAGTGTAGGCCATGTTTCAATTTTTTCAATTAATGTTTGACACGTGTACAATTTTCATAAATAAGTGATTA  
TGAGAATATTGAAAATAATGATTACAGAGATGAGAATCCTATTCTTTTTTGAAGTGTCAACACTCTTTATGAAGAA  
TAGTAAATGGGAAATTGTTTTCTAAACAAATTAGTAATTATTTTGATGATTAATTTAATAATTTCTATGCAGGC  
TATTCTAATCCACGGTGTGGCTGCTGGTGTGGAGCCATTGAAGGAGTTGTGATGGAAATTATAATCACTTTTGC  
TTTGGTGTACACAGTTTATGCCACAGCAGCTGACCCAAAGAAAGGCTCATTAGGCACAATTGCCCCCATTGCTAT  
TGGCTTCATTGCTGGTGCCAACATTTTGGCTGCTGGCCCATTTCTCTGGTGGCTCCATGAACCTGGCTAGGTGCTT  
CGGTCCAGCCGTGGCTAGCGGTGACTTTGCGGGCAACTGGATTTATTGGGTGGTCCACTTATCGGTGGTGGCCT  
GGCTGGACTTGTCTATGCCAATGTGTTTCATGGTCCACGAACACACACCACTTGTTAGCGAGTTCTAA

>Oeu050612.1

ATGGCTGTCCGCCATGGATTTGCTCTGTTTGTGGCAATTTTCGTCGGAGCCAAAATCTCCGGTGGCCATGTAAAC  
CCTGTTGTACCTTTTGCATGCTTCTTGCTCAAAGTTGTCACAGGTGGCTTGCTATTCTAATCCACGGTGTGGCT  
GCTGGTGTGGAGCCATTGAAGGAGTTGTGATGGAAATTATAATCACTTTTGGCTTTGGTGTACACAGTTTATGCC  
ACAGCAGCTGACCCAAAGAAAGGCTCATTAGGCACAATTGCCCCCATTGCTATTGGCTTCATTGCTGGTGCCAAC  
ATTTTGGCTGCTGGCCCATTTCTCTGGTGGCTCCATGAACCTGGCTAGGTGCTTCGGTCCAGCCGTGGCTAGCGGT  
GACTTTGCGGGCAACTGGATTTATTGGGTGGTCCACTTATCGGTGGTGGCCTGGCTGGACTTGTCTATGCCAAT  
GTGTTTCATGGTCCACGAACACACACCACTTGTTAGCGAGTTCTAA

>Oeu050612.1

MAVRHGFALFVAIFVGAkisGGHVNVPVTFACFLKVVTTGGLAILIHGVAAGVGAIEGVVMEIIITFALVYTVYA  
TAADPKKGSGLTIPIAIGFIAGANILAAGPFSGSMNLARSFGPAVASGDFAGNWIYVWGPLIGGGLAGLVYAN  
VFMVHEHTPLVSEF\*

### Oeu007734.1 OeuTIP1;3-related

>Oeu007734.1 | chr4:20127443..20127820 forward  
Incomplete sequence

>Oeu007734.1

ATGCAGGAAACATCTGCATTTGCTTTGGGTGCCAACGTGTCTGTGTGGAACGCCTTTGTATTTGAGATTGTAATG  
ACTTTTGGCCTGGTTTACACTGTGTACGCCACCGCGATTGACCCGAAGAAGGGAGAAGTTGGCATTATTGCACCA  
ATTGCAATTGGTTTCATTGTGGGTGCCAACATTCTTGCTGGTGGGGCATTACTGGTGCTTCAATGAACCTTGCA  
GTGTCATTTGGCCCTGCTCTGGTTAGCTTCACCTGGACCCATCACTGGGTATACTGGGCTGGACCTCTAATTGGT  
GGTGGACTTGCTGGTATTGTTTATGAAGTCTTCTTCATCAGTCATTCTCACGAGCCACTGCCCCGATCGGAGTAC  
TGA

>Oeu007734.1

ATGCAGGAAACATCTGCATTTGCTTTGGGTGCCAACGTGTCTGTGTGGAACGCCTTTGTATTTGAGATTGTAATG  
ACTTTTGGCCTGGTTTACACTGTGTACGCCACCGCGATTGACCCGAAGAAGGGAGAAGTTGGCATTATTGCACCA  
ATTGCAATTGGTTTCATTGTGGGTGCCAACATTCTTGCTGGTGGGGCATTACTGGTGCTTCAATGAACCTTGCA  
GTGTCATTTGGCCCTGCTCTGGTTAGCTTCACCTGGACCCATCACTGGGTATACTGGGCTGGACCTCTAATTGGT  
GGTGGACTTGCTGGTATTGTTTATGAAGTCTTCTTCATCAGTCATTCTCACGAGCCACTGCCCCGATCGGAGTAC  
TGA

>Oeu007734.1

MQETSAFALGANVSVNFAVFEIVMTFGLVYTVYATAIDPKKGEVGIPIAIGFIVGANILAGGAFTGASMNPA  
VSFGPALVSFTWTHHWVYAGPLIGGGLAGIVYEVFFISHSHEPLPGSEY\*

## Oeu041020.1 OeuTIP-related

>Oeu041020.1 | chr20:11792223..11792531 forward  
Incomplete sequence

>Oeu041020.1

ATGACGTTTGGCCTGGTTTACACAGTTTATGCCACGGCAGTGGATCCAAAGAGGGGTGACATTGGTATCATAGCC  
CCTATTGCCATTGGCTTCATTGTGGGTGCCAACATTTTGGCTGGCGGTGCCTTCGACGGTGCATCCATGAACCCA  
GCCGTGTCGTTTCGGCCCTGCAGTCGTTCAGCTGGACATGGGACAGCCACTGGGTGTACTGGCTTGGCCCATTTGTT  
GGTGCTGGAATTGCTGCTATTGTCTATGAAATCGTCTTCATTAACCAGACCACTCATGAACCACTCCCCCTCCAGT  
GAGTACTAA

>Oeu041020.1

ATGACGTTTGGCCTGGTTTACACAGTTTATGCCACGGCAGTGGATCCAAAGAGGGGTGACATTGGTATCATAGCC  
CCTATTGCCATTGGCTTCATTGTGGGTGCCAACATTTTGGCTGGCGGTGCCTTCGACGGTGCATCCATGAACCCA  
GCCGTGTCGTTTCGGCCCTGCAGTCGTTCAGCTGGACATGGGACAGCCACTGGGTGTACTGGCTTGGCCCATTTGTT  
GGTGCTGGAATTGCTGCTATTGTCTATGAAATCGTCTTCATTAACCAGACCACTCATGAACCACTCCCCCTCCAGT  
GAGTACTAA

>Oeu041020.1

MTFGLVYTVYATAVDPKRGDIGIIAPIAIGFIVGANILAGGAFDASMNPVVSFGPAVVSWTWDSHWVYWLGPVF  
GAGIAAIVYEIVFINQTTHEPLPSSEY\*

## Oeu000463.1 OeuTIP2;2-related

>Oeu000463.1 | chr17:6142042..6142582 forward  
Incomplete sequence

>Oeu000463.1

ATGCCTGGAATCGCTTTCGGAAGATTTGACGATTCATTTACCATTGGTTCAATGAAGGCCTATGTGGCTGAATTCA  
TATCCACCTTGCTCTTCGTCTTCACCTAATTGGGCTCCACCATTGCTTATAGTTAGTACTAAAACCACTCTCTTA  
TTTTTACAGCCTATATTTGCGTGCATGAAAACATATAGTAAGTGCATATATAATATGCTGATATTTAGTAACAT  
TTTGATAGTTGATAGATAAGTTGGCGGCGGACGCGGCCCTTGATCCAGCAGGGTTGGTGGCGTTGCTGTTTGCCA  
TGGTTTCGCCCTGTTTGTAGCTGTCTCGGTGGAACCAACATCTCCGACGGCCATGTAAACCTGCAGTCACCTT  
TGGTTTGGCTCTTGACAGCCAAATTACACTTCTTAATGGCATTTTTTTTATTGGATTGCTCAACTTTTGGCTCCAT  
TGTGGCATGCTTTTTGCTTGTAGTTGTCACCGGAGGATTGGTAAGTTCAATTGTAATTGAAAATGCAAAATTTAC  
ATGTTTAGTAAGTTAG

>Oeu000463.1

ATGCCTGGAATCGCTTTCGGAAGATTTGACGATTCATTTACCATTGGTTCAAGTTGCTGTTTGCCATGGTTTCGCC  
CTGTTTGTAGCTGTCTCGGTGGAACCAACATCTCCGACGGCCATGTAAACCTGCAGTCACCTTTGGTTTGGCT  
CTTGACAGCCAAATTACACTTCTTAATGGCATTTTTTTTATTGGATTGCTCAACTTTTGGCTCCATTGTGGCATGC  
TTTTTGCTTGTAGTTGTCACCGGAGGATTGGTAAGTTCAATTGTAATTGAAAATGCAAAATTTACATGTTTAGTA  
AGTTAG

>Oeu000463.1

MPGIAFGRFDDSFTIGSVAVCHGFALFVAVSVGTNISDGHVNPVTFGLALDSQITLLNGIFLLDCSTFGSIVAC  
FLLVVVTGGLVSSIENAKFTCLVS\*

## XIP – Uncharacterized X intrinsic proteins (XIPs)

**OeuXIP1;1 Oeu010056.1**

**Observation:** exon 1 downstream extended with 21n

>OeuXIP1;1\_Oeu010056.1 | chr3:335356..336578 forward **Original version**

ATGGCTGCTAATATTTGGAATGTACATGGAGTAGATGATGAAGAAAGTCAAACCAGTTTGAGCAAAATTCAGCCT  
GTCCCTCTACACCAAGTGAAGTTCTTTTTTTCTTAAATCTCAAGTTCAATATCTTCAGTTTCTTTGTCCTTTTAT  
CCTGAAAAAATTTGAGGGTATTTCTTAGTTTCTTACATTTTGTGTTGGCAGGACACAACAATTGACAGCTGATCTC  
GATAAGAAGAAGCAAACCTCTTACCTCGAGTCAAATGCTTGGTTTGAACGAGCTTTTCTCCCTAGACGTTAGT  
ACATATCCCGATATGTACTTGCAAATTTTAGTTTCTTCTTCTTTTAATTACTGTATAGTCTTATAAATAAGACT  
GTCCTATATAATCCAAGTAACCTTAAGTTTCTTGATAACTGAAGGTTTGGAGGGCATCGGTGGGAGAGCTTATTG  
GATCAGCAGTTCTAGTATTCATGATTGACACTATTGTGATCTCAACCTTTGAGACTGATATCAAAATGCCAAACC  
TCATAATCTCAATTCTCATTGCCATTGTCGTTGCAATTCTCCTCCTCGCTGTACATCCTGTTTCCGGTGGCCACA  
TCAACCCCGTTATCTCCTTTTTCGGCTGGGCTAGTGGGCCTTATCTCCATGTCACGCGCTATAGTTTACATCCTAG  
CCCAATGCATTGGTGAATACTTGGTGCCTGAGCCCTCAAAGCCGTAGTGAGCAGCACCATTGAACAAAACCTTTT  
CACTTGGAGGTTGCACTCTAACAGTGATTGCACCTGGACCCAATGGACCCATAACCCCTTGGCCTTGAGACGGCAC  
AAGCCTTTTGGCTCGAGATTTTCTGCACCTTTGTTTTCTTTTGTCTTCAATTTGGATGGCATATGATCATCGCC  
AAGCAAAGAATTTAGGCCTTGTTCTTGTTTTTCAATTATAGGACTTGTGCTAGGCCTCTTAGTGTTTATTTCCA  
CCACTGTCACTGCCAAAAGGGCTATGCCGGGGCAGGAATGAACCCCTGCTAGGTGCCTTGGGGCTGCAATTGTTA  
GAGGTGGCCACCTCTGGGATGGCCACTGGGTGTTTTGGGCCGGGCTGCTATTGCTTGTGTTGCCTTCTATTTAT  
ACACAAAGATAATTCCACGGCAGCACCATCATGCAAAGGGCTATGGACATGATTTCTTCGATACTGTGAAGGCTA  
TGCTTGGATTTGTTGATCAC**TGA**

>OeuXIP1;1\_Oeu010056.1 **Corrected version**

ATGGCTGCTAATATTTGGAATGTACATGGAGTAGATGATGAAGAAAGTCAAACCAGTTTGAGCAAAATTCAGCCT  
GTCCCTCTACACCAAGTGAAGTTCTTTTTTTCTTAAATCTCAAGTTCAATATCTTCAGTTTCTTTGTCCTTTTAT  
CCTGAAAAAATTTGAGGGTATTTCTTAGTTTCTTACATTTTGTGTTGGCAGGACACAACAATTGACAGCTGATCTC  
GATAAGAAGAAGCAAACCTCTTACCTCGAGTCAAATGCTTGGTTTGAACGAGCTTTTCTCCCTAGACGTTAGT  
ACATATCCCGATATGTACTTGCAAATTTTAGTTTCTTCTTCTTTTAATTACTGTATAGTCTTATAAATAAGACT  
GTCCTATATAATCCAAGTAACCTTAAGTTTCTTGATAACTGAAGGTTTGGAGGGCATCGGTGGGAGAGCTTATTG  
GATCAGCAGTTCTAGTATTCATGATTGACACTATTGTGATCTCAACCTTTGAGACTGATATCAAAATGCCAAACC  
TCATAATCTCAATTCTCATTGCCATTGTCGTTGCAATTCTCCTCCTCGCTGTACATCCTGTTTCCGGTGGCCACA  
TCAACCCCGTTATCTCCTTTTTCGGCTGGGCTAGTGGGCCTTATCTCCATGTCACGCGCTATAGTTTACATCCTAG  
CCCAATGCATTGGTGAATACTTGGTGCCTGAGCCCTCAAAGCCGTAGTGAGCAGCACCATTGAACAAAACCTTTT  
CACTTGGAGGTTGCACTCTAACAGTGATTGCACCTGGACCCAATGGACCCATAACCCCTTGGCCTTGAGACGGCAC  
AAGCCTTTTGGCTCGAGATTTTCTGCACCTTTGTTTTCTTTTGTCTTCAATTTGGATGGCATATGATCATCGCC  
AAGCAAAGAATTTAGGCCTTGTTCTTGTTTTTCAATTATAGGACTTGTGCTAGGCCTCTTAGTGTTTATTTCCA  
CCACTGTCACTGCCAAAAGGGCTATGCCGGGGCAGGAATGAACCCCTGCTAGGTGCCTTGGGGCTGCAATTGTTA  
GAGGTGGCCACCTCTGGGATGGCCACTGGGTGTTTTGGGCCGGGCTGCTATTGCTTGTGTTGCCTTCTATTTAT  
ACACAAAGATAATTCCACGGCAGCACCATCATGCAAAGGGCTATGGACATGATTTCTTCGATACTGTGAAGGCTA  
TGCTTGGATTTGTTGATCAC**TGA**

>OeuXIP1;1\_Oeu010056.1

ATGGCTGCTAATATTTGGAATGTACATGGAGTAGATGATGAAGAAAGTCAAACCAGTTTGAGCAAAATTCAGCCT  
GTCCCTCTACACCAAGTGAAGTTCTTTTTTTCTTAAATCTCAAGTTCAATATCTTCAGTTTCTTTGACACAACAA  
TTGACAGCTGATCTCGATAAGAAGAAGCAAACCTCTTACCTCGAGTCAAATGCTTGGTTTGAACGAGCTTTTC  
TCCCTAGACGTTTGGAGGGCATCGGTGGGAGAGCTTATTGGATCAGCAGTTCTAGTATTCATGATTGACACTATT  
GTGATCTCAACCTTTGAGACTGATATCAAAATGCCAAACCTCATAATCTCAATTCTCATTGCCATTGTCGTTGCA  
ATTCTCCTCCTCGCTGTACATCCTGTTTCCGGTGGCCACATCAACCCCGTTATCTCCTTTTTCGGCTGGGCTAGTG  
GGCCTTATCTCCATGTCACGCGCTATAGTTTACATCCTAGCCCAATGCATTGGTGCAATACTTGGTGCCTGGCC  
CTCAAAGCCGTAGTGAGCAGCACCATTGAACAAAACCTTTTCACTTGGAGGTTGCACTCTAACAGTGATTGCACCT  
GGACCCAATGGACCCATAACCCCTTGGCCTTGAGACGGCACAAGCCTTTTGGCTCGAGATTTTCTGCACCTTTGTT  
TTCCTTTTTGCTTCAATTTGGATGGCATATGATCATCGCCAAGCAAAGAATTTAGGCCTTGTTCTTGTTTTTCA  
ATTATAGGACTTGTGCTAGGCCTCTTAGTGTTTATTTCCACCACTGTCACTGCCAAAAGGGCTATGCCGGGGCA  
GGAATGAACCCCTGCTAGGTGCCTTGGGGCTGCAATTGTTAGAGGTGGCCACCTCTGGGATGGCCACTGGGTGTTT  
TGGGCCGGGCTGCTATTGCTTGTGTTGCCTTCTATTTATACACAAAGATAATTCCACGGCAGCACCATCATGCA  
AAGGGCTATGGACATGATTTCTTCGATACTGTGAAGGCTATGCTTGGATTTGTTGATCAC**TGA**

>OeuXIP1;1\_Oeu010056.1

MAANIWNVHGVDDDESQTSLSKIQVPVSTPVQVLFNLFNLFNIFSLTQQLTADLDKKKQTPLTSSQMLGLNELF  
SLDVWRASVGLIGSAVLVFMIDTIVISTFETDIKMPNLIISILIAIVVAILLAVHPVSGGHINPVISFSAGLV  
GLISMSRAIVYILAQCIGAILGALALKAVVSSTIEQNFSLGGCTLTVIAPGPNPITLGLETAQAFWLEIFCTFV

FLFASIWMAYDHRQAKNLGLVLVFSIIIGLVLGLLVFISTTVTAKKGYAGAGMNPARGCLGAAIVRGHGLWDGHWVF  
WAGPAIACVAFYLYTKIIPRQHHHAKGYGHDFDFTVKAMLGFDVH\*

## OeuXIP1;2 Oeu020684.1

**Observation:** 5' extended with 1455n, generating 2 exons and 2 introns

>OeuXIP1;2\_Oeu020684.1 chr5:9245927..9247542 reverse **Original version**

ATGCTTGACACTATTGTGATATCAACCATTGAGTCTGATATCAAAATTCCAAACCTTGACTATCAATCCTTGCA  
GCCATTATTATTGCTATACTACTTCTTGCTGTACATCCAGTTTCCGGTGGCCACATCAACCCGGTTATCTCCTTC  
TCTGCCGCCCTGGTTGGGTTAATCTCTATGTGCGAAAGCCTTCATATACATTGTTGCACAATGTCTTGAGCCGTG  
CTAGGTGCGGGTTGAAAACCCAATGAACAAACTTTATTTTGTTCCTTCAAAGTAGTCCCTTCACGTTTATGTTTCTT  
TCAGCTTGATGACTATGGCAACATGTTTCGACTTAAATTGGATGGTCAAAGTGAACAAAAAGCAAACCTACTTAGGG  
CCTGTTTGAAGGGCCAATTTTCCATGGAAAATGGAAACATTTTCCCTTTTGGCCTGTTTGATTGCAATAATTT  
TCTAACCCCCACATGACCATTTTCCCTTGATTTTGTGGAAAACGGGAATTGGTTTTCAGCTGATTTTCTTTT  
TTTTTTTTTAATATTTTGGCAATTGGAACAAATCTATTTATAATTGTCAAAAATCTATCATTTTAATTGAC  
AATTTTCATGAAACACAAAGTCAAATGAACACTAAAAGATCCAAAATTTCAACATCTTTTAAGTGAAAAATTATA  
CCAATCAAACACATTTAATTGACAATTTCCAATAAAAATAAGTTCTAGGAAATTTAATCTCTGAAATTTCTTTTC  
TTTTCACCCAAATTTTATTCTTACAATCAAACGGATCCTTAGGGTTATTCCCCCTGTATAGAGAGTTTGTAGCGC  
AGCACCCATGTGGTTGGAATTTTTTTTCCCAAAGCTCAATAGAATAATGCCAAGTGTCTCCCTTTAAACAAATC  
TAGAAAGTTTGTCTATACACATGGCAGGTTCAACCCTTAAAGTATGTTTCGTTTAGATTAAATCATCACAT  
ATTTCAAATCTTCTATTACAATATACTAAAAATCTAATTTTAATCCTTACCAAACACCATCTAAATAAAGTTTCG  
ATAATGGGTTGAAATTTTGTCTATGAGTTGAGCGACTAACAATATTTGCTTACAGGTGCACTAGCTCTTAAAGCTG  
TGGTCAGTAGCACCCTGAAGAAACCTTCTCACTTGGCGGCTGCACCCTGACTGTGATTGCACCCGGCCTGAATG  
GACCTGCTACGGTAGGCCTCGAGACGGTCCAAGCCTTTTGGCTAGAAATATTTTGCACCTTTTGTGTTCCCTTTTG  
CTTCAATTTGGATGGCATATGATCCACGGCAAGCAAAGGAATTAGGTCATGTCTCATCTTTTCAATTGTGGGAG  
TTGTGTTAGGTCTCCTAGTATTTATCTCCACCACTGTACAGCCAAAAAGGGATATGCTGGGGCCGGGATGAACC  
CGGCTAGGTGTTTTGGCCCGGCGATTGTTAGAGGCGGCCACCTATGGAATGTCTACTGGGTTTTCTGGGCTGGCC  
CGACCATTCGATTCGCTGGCATTCTATTTGTACACACAGATTATTCATGTCTAGCACCACCGGTGCAAGTATCTT  
ATGATCATGATTTCTATAATGTTGTCAAGGCTATATTTTGA

>OeuXIP1;2\_Oeu020684.1 chr5: 9245927..9248997 **Corrected version**

ATGGCTGGTAATAATGGGCATGTAAATGTAGAATATGATGAAGAAGGCTTGAGTGGTGCAAGCAAAATTCACCT  
GTCTTCTCTACTCCAATGCAAGTTCATTTCTTTCTTTGAACCTTTTATATTATTATATTAAATTTTCAAATCTT  
GTTATAGTTGATAAAAATAGGGGTGGACATGGTTCCGTTTAAATCCTAGTTCCAAGATAATCGAATCGAACTCAA  
TCATGAATCAATTATTTTTTTGGTAATGGAACATAATGGTTTTTATTTTATTTTCTAAAGATATGGAACCG  
AGTTAAGTTCGATTTTCAATTTAATTTTGGTCTGGTTTGGTTTGATTCCATTTTAAAGTAACGGAACCTGAACCGAA  
TCTTTAAAGAAGAAGAAGAAGAAATCATTGGTTTCATGATTAAAAAAGCCATTGGTTTCGTGGTTTCGCTTCGATTC  
TCTTGAATCAAAACCAAATGGACCATGTCTACCCTAGGTAAAAATATAGTCAATTTAGATTTTTTAATAGTTATA  
GTGCTTGTTTGGTAGAGATTTTGTAAATTGATTTTTTGACCGATAGGATTCTACTTGTGAGAAAAAGAAATCAAAA  
ACGACGGCTGGAATAGTGAATAATGGTAAAAAACTAATGTTAATTGAATTAATAATCTCTACCAAACATGCTCA  
TAGCAGTGAACATGAAAGAATAGATAGGAAAGAACAATCACTCTTTTCTTTTCTTTTCTTTTCTTTTCTTTTCT  
TTTTTCTTTTCTTTTCTTTTCTTTTCTTTTCTTTTCTTTTCTTTTCTTTTCTTTTCTTTTCTTTTCTTTTCT  
CGTAGCTGACCTTAAATTTATTAAGAATATTATGTTTCTTCAAATCTCGTAGTTGATACGCTCTCCGTGAACATAAA  
TAGAAAGATGAAATGATTCAAGTAGTCCATCCAAAATTTATAAAGAATAACCAATAGTTTATCTTTTGTGAGG  
TTTTCTTTAAAAATCTTGTGTTCTGGAAGTTAAAACTGTGTATGCTTAGCAGGCCAGAGAACAGGACAGATGA  
GGAGAAAATGAAGAAGACAACCTTCTCTTACTCTGAGTGAATTGCTGGGTTTGGACGACTTCTTTTCTCTAGATGT  
TAGTACTTCTTTCTCTTCAAGAAAATGTCTTTAGATTAGTGTTCAAAGATAAAATTTTCAATAAATAACATGTC  
ATGTCTTCAATAATTTAACTTTTAAACAAGATAGTTCAACTTAGTATTGGAATGGCAAAGATCCACCGTTCAAGT  
TTCACCAATTACTTACATGCGGAAAACCTGGATTTAAATAAATCAATATGCCGTATATCTAACAATTTAAACTTTT  
AAATGAGATAATATGAGTAAGAAAATATCATGTTATTTTTGTTTATTCTTGAAGGTTTGGAGAGCCTCAGTAGGC  
GAGCTGGTTGGCACGGCGGTTCTTGTATTGATGCTTGACACTATTGTGATATCAACCATTGAGTCTGATATCAAA  
ATTCCAAACCTTGTACTATCAATCCTTGACGCCATTATTATTGCTATACTACTTCTTGCTGTACATCCAGTTTCC  
GGTGGCCACATCAACCCGGTTATCTCCTTCTCTGCGGCCCTGGTTGGGTTAATCTCTATGTGCGAAAGCCTTCATA  
TACATTGTTGCACAATGTCTTGGAGCCGTGCTAGGTGCGGGTTGAAAACCCAATGAACAACTTTATTTTGTGTTT  
AAAGTAGTCCCTCACGTTTATGTTTTCTTTTCTTTTCTTTTCTTTTCTTTTCTTTTCTTTTCTTTTCTTTTCT  
CAAAGTGAACAAAAAGCAAACCTACTTAGGGCCTGTTTGAAGGGCCAATTTTCCATGGAAAATGGAAAACATTTT  
CCCTTTTGGCCTGTTTGAATTGCAATAATTTTCTAACCCCCACATGACCATTTTCTTTGATTTTGTGGAAAACGG  
GAATTGGTTTTTCCAGCTGATTTTTTCTTTTTTTTTTTTTTAAATATTTTTTGGCAATTGGAACAAATCTATTTATA  
ATTGTCAAAAATCTATCATTTTAAATTGACAATTTTCATGAAACACAAAGTCAAATGAACACTAAAAGATCCAAA  
ATTTCAACATCTTTTAAAGTGAAAAATTATACCAATCAAACACATTTAATTGACAATTTCCAATAAAAATAAGTTCT  
AGGAAATTTAATTCTCTGAAATCTTTTTCTTTTCACCCAAATTTTCAATCTTACAATCAAACGGATCCTTAGGGT



TATTCCCCCCTGTATAGAGAGTTTTAGCGCAGCACCCATGTGGTTGGAATTTTTTTTCCCCAAAGCTCAATAGAA  
TAATGCCAAGTGTCTCCCTTTAAACAAATCTAGAAAGTTTGTCTATACACATGGCACGGTTCAACCACTTAAAG  
TATGTTTCGTTTAGATTAAAATCATCACATATTTCAAAATCTTCTATTACAATATACTAAAAATCTAATTTTAAT  
CCTTACCAAACACCATCTAAATAAAGTTCGATAATGGGTGGAATTTTGCTATGAGTTGAGCGACTAACAATATT  
TGCTTACAGGTGCACTAGCTCTTAAAGCTGTGGTCAGTAGCACCCTGAAGAAACCTTCTCACTTGGCGGCTGCA  
CCCTGACTGTGATTGCACCCGGCCTGAATGGACCTGCTACGGTAGGCCTCGAGACGGTCCAAGCCTTTTGGCTAG  
AAATATTTTGCACCTTTTGTGTTCCCTTTTGGCTTCAATTTGGATGGCATATGATCCACGGCAAGCAAAGGAATTAG  
GTCATGTCCTCATCTTTTCAATTGTGGGAGTTGTGTTAGGTCTCCTAGTATTTATCTCCACCCTGTCACAGCCA  
AAAAGGGATATGCTGGGGCCGGGATGAACCCGGCTAGGTGTTTTGGCCCGGCGATTGTTAGAGGCGGCCACCTAT  
GGAATGTCTACTGGGTTTTCTGGGCTGGCCCGACCATTGCATGCGTGGCATTCTATTTGTACACACAGATTATTC  
CATGTCAGCACCACCGGTCTGAAGTATTCTTATGATCATGATTTCTATAATGTTGTCAAGGCTATATTT**TGA**

>OeuXIP1;2\_Oeu020684.1

**ATG**GCTGGTAATAATGGGCATGTAAATGTAGAATATGATGAAGAAGGCTTGAGTGGTGCAAGCAAAATTCACCT  
GTCTTCTCTACTCCAATGCAAAACAGGACAGATGAGGAGAAAATGAAGAAGACAACCTTCTCTTACTCTGAGTGAA  
TTGCTGGGTTTGGACGACTTCCTTTTCTCAGATGTTTGGAGAGCCTCAGTAGGCGAGCTGGTTGGCACGGCCGTT  
CTTGTATTCATGCTTGACACTATTGTGATATCAACCATTGAGTCTGATATCAAAATTCAAAACCTTGTACTATCA  
ATCCTTGCAGCCATTATTATTGCTATACTACTTCTTGTGTACATCCAGTTTCCGGTGGCCACATCAACCCGGTT  
ATCTCCTTCTCTGCCGCCCTGGTTGGGTTAATCTCTATGTCGAAAGCCTTCATATACATTGTTGCACAATGTCTT  
GGACCGGTGCTAGGTGCATAGCTCTTAAAGCTGTGGTCAGTAGCACCCTGAAGAAACCTTCTCACTTGGCGGC  
TGCACCCTGACTGTGATTGCACCCGGCCTGAATGGACCTGCTACGGTAGGCCTCGAGACGGTCCAAGCTTTTGG  
CTAGAAATATTTTGCACCTTTTGTGTTCCCTTTTGGCTTCAATTTGGATGGCATATGATCCACGGCAAGCAAAGGAA  
TTAGGTCTATGTCCTCATCTTTTCAATTGTGGGAGTTGTGTTAGGTCTCCTAGTATTTATCTCCACCCTGTCACA  
GCCAAAAGGGATATGCTGGGGCCGGGATGAACCCGGCTAGGTGTTTTGGCCCGGCGATTGTTAGAGGCGGCCAC  
CTATGGAATGTCTACTGGGTTTTCTGGGCTGGCCCGACCATTGCATGCGTGGCATTCTATTTGTACACACAGATT  
ATTCCATGTCAGCACCACCGGTCTGAAGTATTCTTATGATCATGATTTCTATAATGTTGTCAAGGCTATATTT**TGA**

>OeuXIP1;2\_Oeu020684.1

MAGNNGHVNV EYDEEGLSGASKIQPVFSTPMQNR TDEEKM KKTSLTLSELLGLDDFLSSDVWRASV GELVGTAV  
LVFMLDTIVISTIESDIKIPNLVLSILAAII IAILLLAVHPVSGGHINPVISFSAALVGLISMSKAFIYIVAQCL  
GAVLGALALKAVVSSTTEETFSLGGCTLTVIAPGLNGPATV GLETVQAFWLEIFCTFVFLFASIWMAYDPRQAKE  
LGHVLIFSIVGVVLGLLVFISTTVTAKKGYAGAGMNP ARCFGPAIVRGHLWNVYWVFWAGPTIACVAFYLYTQI  
IPCQHRSKYSYDHDFYNVVKAI F\*

### OeuXIP1;3 Oeu046122.1

**Observation:** 5' extended with 855n, generating 2 exons and 2 introns

>OeuXIP1;3\_Oeu046122.1 chr16:11367503..11368665 reverse **Original version**

**ATG**CTTGACACTATTGTGATATCAACCATTGAGACTGATGTCAAAATGCCAAACCTTGATTTGTCAATCCTTGCA  
GCCATTATTATTGCAATAGTACTTCTTGCAGTGCATCCTATTTCTGGAGGCCACATCAACCCAGTTATCTCCTTC  
TCGGCTGCCCTAGTTGGGTTGATCTCTGTGTCGAAAGCCTTAATCTACATTAGTGCACAATGTCTTGGAGCCGCG  
CTAG**GTGAGGGTTAAACTCCCTATCGACGAAC**TTTATTTTGT**TCCAAAGTAGTCCATGAAGTTCACGT**TGTCTTC  
**CAGTTTGATGACTAAAGTTAAAATTCTTGAAAAATGCTACCTGTACAGATTTTTTTTAACAGACAGGGTTACAGGT**  
**GCTGAGTTGATAAGATTTTATTGGTTGGTTTAACTTTGTTTTGTTATCCCAAATGGTGTGACATCTCGTCAACGT**  
**AGCATTCTGTTAAAACAGTTTGTACAAGTAGCATTCTCCTCAAATCTTTAGTTTTCTAATAGAATGTTTGGCTT**  
**AGATCAGATGATCAGGTGAAACAAAAAGCAA**ACTCTAGTTATCACTCTAAAGCAAAGAAATGTT**CGATAAAATAAT**  
**ATGAAACCTCACTATAAATTGAGTGACTAACAATGTTTTTTTACGCGACTACAG**GTGCACTAGCTCTTAAAGCTG  
TGTTTAGTAGCACCATTGAACAAACCTTCTCACTTGGAGGCTGCACCCTGACAGTGATTGCCCTGGCCCGAATG  
GGCTCGTTACAATCGGCCTCGAGACTGCCAAAGCCTTTTGGCTAGAAATAATTTGTACCTTCGTACTCCTTTTGTG  
CTTCAGTTTGGATGGCATATGATCATCGCCAAGCAAAGGCATTAGGTCGTGTTCTTGTCTTTTCAATTGTGGGAG  
TTGTGCTAGGTCTCTTAGTGTTTCATCTCCACCACAGTCACGGCCAAAAAGGGCTACGCCGGGGCGGGGATGAACC  
CGGCTAGGTGTTTTGGTGCAGCGGTTGTTAGAGGTGGCCACCTATGGAATGGACACTGGATTTTTCTGGGTGGGCC  
CCGCCATTGCTTGCCTGGCCTTCTATTTGTACACGAAGATTATTCCACGTCAGCATTATCAGGCGAAGTTTTATG  
ATCACGATTTCTTTAATGTTGTCAAGGCTATGTTT**TGA**

>OeuXIP1;3\_Oeu046122.1 chr5:11367503..11369530; **Corrected version**

**ATG**CGCGGTGATAATGGGCATGTACATGTAGAATATGATGAAGAAAGTTT**GAGTAGTG**CAACAAAAATTCACCT  
GTCTTCTCTACACCTATGCAAG**TTCA**TTTTCTTTCTTCAACTTTTACTTATTTATATATGTTT**TTCAAACTCTC**  
**TTGTAGTTGGAAAAAAATAGTCGATTTAGATTTTCCAGTAGGTGTAACAGTGAAGCGAACGAAAAGATGGGAAA**  
**GATGTTACAGTAGCTAGATATGTATCCGTAGTAGATTCCAAATTTATTAAGAATAAAGCATAATTTATCATTTG**  
**TTGTGGTTTCTTCAAACTCTTGTCGTTTTTGATAAGTTAAACTTCGAACGTTTAGCAGGCCAGAGCACTGGACA**  
**GATGAGCAGAAAAGGACGAAGAATACTTCTCTTACACTGAGTGAATCGCTGGGCTTGAAGACTTCCTTCTTTA**  
**GATGTTTGTACCTTTTTTTCTCTTCAACCACCGCGCCCTGCTCCTCCCCACCCCACTCAAAGATTAAATATACA**

TGATTAAACATGTCATTATTAAAGTCTTCCGAATGATGCGATTCTATATAGTGTTAGAATGACAAAATCTTGCTT  
TCAAGACTCGCCACCGGACCGGTATGAAAATTATGCATATGATTGAGCCTTTTGATGAGAATATTTCTACCTACA  
TCTGAAAGGACGTGCTAAAAATTGAATTTAAACAAATAAAATTTTTTCTATCTATAAAATTTAAACTTTTAAACAA  
GATGATTCTTGTTTACTCTTGAAGGTTTGGAGAGCCTCACTGGGAGAGCTGATTGGCACAGCAGTTCTTGTGTTC  
ATGCTTGACACTATTGTGATATCAACCATTGAGACTGATGTCAAAATGCCAAACCTTGTATTGTCAATCCTTGCA  
GCCATTATTATTGCAATAGTACTTCTTGCAGTGCATCCTATTTCTGGAGGCCACATCAACCCAGTTATCTCCTTC  
TCGGCTGCCCTAGTTGGGTTGATCTCTGTGTGCGAAAGCCTTAATCTACATTAGTGCACAATGTCTTGGAGCCGCG  
CTAGGTGAGGGTTAAACTCCCTATCGACGAACTTTATTTTGTTCCAAAGTAGTCCATGAAGTTCACGTTGTCTTC  
CAGTTTGATGACTAAAGTTAAAATTCTTGAAAAATGCTACCTGTACAGATTTTTTTTAAACAGACAGGGTTACAGGT  
GCTGAGTTGATAAGATTTTATTGGTTGGTTTAACTTTGTTTTGTTATCCCAAATGGTGTGACATCTCGTCAACGT  
AGCATTCTGTTAAAACAGTTTGTACAAGTAGCATTCTCCAAATTCTTTAGTTTTTCTAATAGAATGTTTGGCTT  
AGATCAGATGATCAGGTGAAACAAAAAGCAAACCTCTAGTTATCACTCTAAAGCAAAGAAATGTTTCGATAAATAAT  
ATGAAACCTCACTATAAATTGAGTGACTAACAATGTTTTTTTACGCGACTACAGGTGCACTAGCTCTTAAAGCTG  
TGGTTAGTAGCACCATTGAACAAACCTTCTCACTTGGAGGCTGCACCCTGACAGTGATTGCCCCCTGGCCCCGAATG  
GGCTCGTTACAATCGGCCTCGAGACTGCCCAAGCCTTTTGGCTAGAAATAATTTGTACCTTCGTACTCCTTTTTTG  
CTTCAGTTTGGATGGCATATGATCATCGCCAAGCAAAGGCATTAGGTGCGTGTCTTGTCTTTTCAATTGTGGGAG  
TTGTGCTAGGTCTCTTAGTGTTTCATCTCCACCACAGTCACGGCCAAAAGGGCTACGCCGGGGCGGGGATGAACC  
CGGCTAGGTGTTTTGGTGCAGCGGTTGTTAGAGGTGGCCACCTATGGAATGGACACTGGATTTTCTGGGTGGGCC  
CCGCCATTGCGTGGCCTTCTATTTGTACACGAAGATTATTCACGTCAGCATTATCAGGCGAAGTTTATG  
ATCACGATTTCTTTAATGTTGTCAAGGCTATGTTT**TGA**

>OeuXIP1;3\_Oeu046122.1

**ATG**GCCGGTGATAATGGGCATGTACATGTAGAATATGATGAAGAAAGTTTGAGTAGTGCAAAACAAAATTCAACCT  
GTCTTCTCTACACCTATGCAACACTGGACAGATGAGCAGAAAAGGACGAAGAATACTTCTCTTACACTGAGTGAA  
TCGCTGGGCTTGGAAGACTTCCTTTCTTTAGATGTTTGGAGAGCCTCACTGGGAGAGCTGATTGGCACAGCAGTT  
CTTGTGTTTCATGCTTGACACTATTGTGATATCAACCATTGAGACTGATGTCAAAATGCCAAACCTTGTATTGTCA  
ATCCTTGCAGCCATTATTATTGCAATAGTACTTCTTGCAGTGCATCCTATTTCTGGAGGCCACATCAACCCAGTT  
ATCTCCTTCTCGGCTGCCCTAGTTGGGTTGATCTCTGTGTGCGAAAGCCTTAATCTACATTAGTGCACAATGTCTT  
GGAGCCGCGCTAGGTGCACTAGCTCTTAAAGCTGTGGTTAGTAGCACCATTGAACAAACCTTCTCACTTGGAGGC  
TGCACCCTGACAGTGATTGCCCCCTGGCCCGAATGGGCTCGTTACAATCGGCCTCGAGACTGCCCAAGCCTTTTGG  
CTAGAAATAATTTGTACCTTCGTACTCCTTTTTGCTTCAGTTTGGATGGCATATGATCATCGCCAAGCAAAGGCA  
TTAGGTGCGTGTCTTGTCTTTTCAATTGTGGGAGTTGTGCTAGGTCTCTTAGTGTTTCATCTCCACCACAGTCACG  
GCCAAAAAGGGCTACGCCGGGGCGGGGATGAACCCGGCTAGGTGTTTTTGGTGCAGCGGTTGTTAGAGGTGGCCAC  
CTATGGAATGGACACTGGATTTTCTGGGTGGGCCCCGCCATTGCTTGCCTGGCCTTCTATTTGTACACGAAGATT  
ATTCCACGTCAGCATTATCAGGCGAAGTTTTATGATCACGATTTCTTTAATGTTGTCAAGGCTATGTTT**TGA**

>OeuXIP1;3\_Oeu046122.1

MAGDNGHVHVEYDEESLSSANKIQPVFSTPMQHWTDQKRTKNTSLTSES LGLEDFLSLDVWRASLGELIGTAV  
LVFMLDTIVISTIETDVKMPNLVLSILAIIIIAIVLLAVHPISGGHINPVISFSAALVGLISVSKALIYISAQCL  
GAALGALALKAVVSSTIEQTFSLGGCTLTVIAPGPNGLVTIGLETAQAFWLEIICTFVLLFASVWMAYDHRQAKA  
LGRVLVFSIVGVVLGLLVFISTTVTAKKGYAGAGMNPARGFAAVVRGGHLWNHGWIFVWVGAIAACVAFYLYTKI  
IPRQHYQAKFYDHDFFNVVKAMF\*

## NIP – Nodulin-26 like intrinsic proteins

OeuNIP1;1 Oeu060187.1

>OeuNIP1;1\_Oeu060187.1 | chr21:7140088..7142220 forward

**ATG**GCTGAAATGTCCGGAGCAAATGGAGTGTCCCTGAGTATAAAGGATGATGTGAACGAGAAGAGAATTCAAGAT  
TCTCCAGACTGGTTGCCTTTTATACAGAAGGTACATACGAGGTTTCCTTTTATTTTCGACAACCTTAATCCTCCC  
AACAGAACACAACTGATATCTTCTATGTCCATAATTATGTGTTCAATCTTTCTTGGAGAGACGATGAAATCGA  
TGCCCTCTTAATAAATGCTACAGTTAGTGGTTTATAAAGTACATAAGATTGTCCAACCAGGCAACAGTCTTTAGT  
AATCAATATTACGAAAATGATGTATAGCTGCTTAATTTGACACTGGTAATTAATGTTGAAAACTTGATTGGCCAA  
CTTATTTTGGTACTGTAGATAATTGCAGAGATTTTGGGTACATACTTCTTGATTTTCGCCGGTTGTGCCGCGGTG  
GTGGTGAACGCCGACAAGGACAAGATTATAACCATGCCCGGAATCGCGATTGTGTGGGGACTTGTGGTCATGGTT  
ATGATTTACTCGGTTGGTGCATATATCTGGTGCACATTTTAATCCGGCTGTGACCATTGCTTTTGCCCTCCTGCAAG  
AGGTTCCCATTGAGACAGGTTAGGTCAGCTCAAGTTACATCGATCCTTATGTACCGAATATGCTCTTAATTTCTT  
TGTGTTCCGGTTGTGACTCCAAACAGGTACCGGCATATATTTTCGGCTCAAATGATTGGAGCCACACTAGCAGGCGG  
AACCTACGGTTATTGTTCCAAGGAAAACATGACCATTTCGGTGGAACATTTCCGACCGGCAGCGACATGCAGTC  
TTTTGTTGTGGAATTCATAATCACATTCTACCTCATGTTTCGTCATATCTGGAGTTGCTACCGACAACCGAGCTGT  
AATTAGTCTAATTCCTTCACCAATTATTATTAAATAGTTATATTTCAGTACTACTGGTATCAAGCACCAGTTTAAAG  
TAGCAATTGTATGACATTACATGATAGATTTCATTTAAATGTATCGTCACATGATTTCATTTAATTGAACATCAAA  
GTGTGGTTATTTAACTGATGTTATAGCACCAGTACTAGATAACATTATTCATTATTATTAGTCCAAAAATT  
TATTTATAATATATATCGTGTCTTAGGATAATTCTTCCAAAAGACAACATAGAGTTCTGTACTTTTGTAAATAA  
ATTCAAGAAACGGGATTAATAAGAAATCATGGTGATTTTTTTTATAGGTAATAATGGAGGAAGATAATGACATTTT  
TATTAAAGCTTATCTATGTTGACAATGATATGGCCCTTGTGCGATAATTTCTTTTATGATTTTCTTTTATTCGGG  
TTGCCATGCAGATTGGAGAAGCTTGCAGGTTTAGCCATTGGAGCGACTATTTTACTTAATGTGATGATTGCAGGGT  
AAGTTCTATGCTCGATTATCTTGCTAATTTTAAATAAGATTGTATTACAAAATCATATCTTGGGAACATTTTCA  
ATTTGTGATCTATTTTCAATTCTTAAATCTTGCTTAATCCGGTATCATGATTCTACTTAAATTTCTAATAAGAC  
AAATATATTGGATTCAAAAACATAAATGATGCGATAGGAATTTCTGAAGAGTAAGATAAGCCGAAGCTCTTCTAAAA  
TAATAGTACGAATAAGTTAATGACTTGAGTACAGTGTGTTTTGAGTTTGGATAATGTTATTTTGGTGACGACACT  
ATTGATATTAAATTATATGTTTAAATTAAATACAATAAATTATGACTCATTTAATAGGATATGCTGACATATAAAC  
TAGTGTTGAACACATAAATTGGTACTAGATACTATTATTCTTTAAGTTTATATTGAAATTTTATTTCAAAAATAT  
CGATTATGGACTTGATGCTTGGTAGCTTTAATGGACAGGCCAGTATCTGGGGCTTCAATGAACCCAGCAAGGAGT  
TTGGGCCCAGCAATAGTGTCCAATAAATACAAGGGAATATGGATATACATAGTGGGCCCCAAGCTCTTGGGGCTGTA  
GCAGGTGCTTGGGTCTACAATATCATCAGATTACAAAACAAGCCTTTAAGAGAAATCACCAAGAGTGCTTCTTTT  
CTCAAGAGCTCGGCCCCGAATGGGTCCAAC**TAA**

>OeuNIP1;1\_Oeu060187.1

**ATG**GCTGAAATGTCCGGAGCAAATGGAGTGTCCCTGAGTATAAAGGATGATGTGAACGAGAAGAGAATTCAAGAT  
TCTCCAGACTGGTTGCCTTTTATACAGAAGATAATTGCAGAGATTTTGGGTACATACTTCTTGATTTTCGCCGGT  
TGTGCCGCGGTGGTGGTGAACGCCGACAAGGACAAGATTATAACCATGCCCGGAATCGCGATTGTGTGGGGACTT  
GTGGTCATGGTTTATGATTTTACTCGGTTGGTGCATATATCTGGTGCACATTTTAATCCGGCTGTGACCATTGCTTTT  
GCCTCCTGCAAGAGGTTCCCATTTGAGACAGGTACCGGCATATATTTTCGGCTCAAATGATTGGAGCCACACTAGCA  
GGCGGAACCCCTACGGTTATTGTTCCAAGGAAAACATGACCATTTCGGTGGAACATTTCCGACCGGCAGCGACATG  
CAGTCTTTTGTGTGGAATTCATAATCACATTCTACCTCATGTTTCGTCATATCTGGAGTTGCTACCGACAACCGA  
GCTATTGGAGAAGCTTGCAGGTTTAGCCATTGGAGCGACTATTTTACTTAATGTGATGATTGCAGGGCCAGTATCT  
GGGGCTTCAATGAACCCAGCAAGGAGTTTGGGCCCAGCAATAGTGTCCAATAAATACAAGGGAATATGGATATAC  
ATAGTGGGCCCCAAGCTCTTGGGGCTGTAGCAGGTGCTTGGGTCTACAATATCATCAGATTACAAAACAAGCCTTTA  
AGAGAAATCACCAAGAGTGCTTCTTTCTCAAGAGCTCGGCCCCGAATGGGTCCAAC**TAA**

>OeuNIP1;1\_Oeu060187.1

MAEMSGANGVSLSIKDDVNEKRIQDSPDWLPFIQKIIAEILGTYFLIFAGCAAVVNVADKDKIITMPGIAIVWGL  
VVMVMIYSVGHISGAHFNPAVTIAFASCKRFLRQVPAYISAQMIGATLAGGTLRLLFQGKHDHFGGTFPTGSDM  
QSFVVEFIITFYLMFVISGVATDNRAIGELAGLAIGATILLNVMIAGPVSASMNPARS LGPAIVSNKYKGIWIY  
IVGPTLGA VAGAWVYNIIRFTNKPLREITKSASF LKSSARNGSN\*

OeuNIP1;2 Oeu040934.1

**Observation:** 5' extended with 2042n, generating 3 exons and 3 introns

>OeuNIP1;2\_Oeu040934.1 | chr13:1733166..1733943 forward **original version**

**ATG**TTTGTCAATTTCTGGTGTAGCCACAGATAATCGAGCTGTTAGTTCATCTTCTTCATCCATTATATTTTTTAT  
CATCCATGTTTAGATTTCTGATTGATTTAAATTTCTATTGTTAATTACTAATTGTCTCTATCTAATAATAACAAC  
ATTCTTTGTCAACGATGCAGATTGGAGAAGCTCAAAGGCATTGCCATTGGAGCTACTCTTTCACTTAACATACTTT  
TCGCCGGGTACGGCTGATTAATTTAGATAAATTGTCCCGTAGCTTAATTTACACCAGATTGATTCAAGTTCCGAT

GAATCAACTACTATGAATATTGAGTACGATGAGTTTTGATTAAATGAAGATGAATTTGAAAAAATAAATGTGTC  
ATTTTTTTAATATTGCATGTTTTTAGATGAGATAGTTTAAACAAACAATTTCTTGAATACTTTCATCACACATTTCG  
AATTTGATACACGATACTCGACATGATTGAAAAATATTAACCTCTAAGGCTTGTTCTGAAATGACAGGCCAATTTTC  
AGGGGCATCACTGAATCCAGCAAGGAGTTTGGGACCAGCAATTGTTTACAATCGCTACGAGGGTTTGTGGAACATA  
CATTCTGGCTCCTATTTCTGGAGCCATAGCAGGTGCTTGGGTCTATAATTTTATCAGATTTACGGACAAGCCCTT  
GCGTGAAATTATCAAAAGGGGATCTTCCATTAGAAACGCAGCACGAACCAACTCTACTCAAGTATCAAGAAACAA  
AAAGAGGATAAAATTTTGTATTATTATTA**TAA**

>OeuNIP1;2\_Oeu040934.1 | chr13:1731124..1733943 forward **Corrected version**

**ATG**GACGATATGTCTCGAGTCAGTTCCAACCGAGTAGTGTCCATTAACATAGAAGATGATGATTTCAATCAAAAAC  
CCTCCTCCTCCTACATCCACTAACACCAGGAATTCTTCAGGCTGTTCTATTTCTGTATCTTTTCGTGCAAAAG**GTG**  
ATTCTGATTCTCCTACAAAAGTTTTTTTTATCTGTTATCTACTATTATTTTGTGCTAATATATATGTTATATGTA  
ATTTATTCCATGCTTACAGTTGATCGCAGAGTTTATTGGAACCTACTTCCTAATATTTGGTGGTTGCGCAGCCAT  
CACGGTGAACAAAACATGGAATGTAGTGACACTTCCAGGAATAGCCGCCGTGTGCGGACTGGTGGTGGTGGT  
CATGATTTACTCCGTTGGACATATTTCTGGAGCACATTTGAATCCCCTGTAAACCATTGCTTTTGCCACCTTCAA  
GAGGTTCCCGTGGAACAGGAAATATACATATATACGTTTATACTTGAATCTCCCCTAATAGGTTTTTAACAGTTGA  
AAACGCCGTTTCTCATCGCTTAAGCTTTAAGATGAGTAGGCTTGCGTTTGATGAAAAATCCAAGCTTCACATGCG  
GAGGCTTTGTCTCTCTATAAAAGCTTAAGCTTCTATATGAGGTGGTTCAACACATCTATATATTGTTTTTGACA  
TGATCAAACGTGGGTTTTCTCATCGTGCAGGTACCAGCCTATGTCTGATCTCAAGCTCTTGCTTCAATTGTAGCC  
AGGCGCGGAGCCAGCACCCGCGAGGGGCGCGGCGCGCTGGCTCTGCGGAGCTGCAGAGCCGCGCGG  
CAGTGTCAACAGTGGTGGTCCGACGGTCTGAGAGAAGAAGATGGAACCCGTTTCAATTTTTTTTTTGGTT  
TGGGCTTTTTTACAAAATGTTGGGCCTTTTATTATTTAGCCAAATTCCAAACCCATTAGCCTGACCCATATTA  
ATACCCATTTCAATGATTTTATTGCCCTTTCTTTCAATTTCAGAATCGTGAAGGTGAATTCGTGACTTCGTTCAA  
TTCGTTGGCTGCGGCTGGGACTGGGAGGGATCCTCTTCTAATCCTCTTCACTTTTCAATTTGTGGACCGGTTCA  
AAAAATTGCTGCAGTCTGCAGACTGCAGACCGAAACTCGAAGCTCGAAGACTCGCCTGCTCCAGCCTCCAGG  
CCTCCAGTGTCTGCTGAGTCTTACTGCCGCTGCTGCGGTGCTGCCGAGAGGCCCTAGTCACCCGACTCCGACTG  
CCGACTGGTAAGTGTAAGTGTGGTAACTCTTTTTTTTTTCCGGCCCTCTTTATTTTTTATTTTTTTTGTTC  
TTTATTGGTTTTGTTCTATTTTGATTTGGCTATTTTGATTTTGTGTAATTTTGTCTACTTGTAAATGTCTCAAT  
TTATTGGAGTTTTGAGCTTTTCAATCATGTGTTCCCTCATACTGTACCTTTAATCAATTGTCAAAAACCAATGAGA  
TTTAGCACTTAGCAGCAATGATTTTTAATAAGTTAAATTCTCTTTCTCTCATGCGTTTTTCAAAATTATACG  
GAAATTTATACTTGCTAGTTGCTAAATGTAGTCAAGGATTTTGTCTATAATTTTGACATCTACAAACCACTGGT  
CGTTTATAGAGTTGTAAAGGTAGTGTAGTAAAGTTAGAATGACCAATTTTGTAGTGTAGTCAAGCGTGCATGAA  
ATAGCTTAAATTTTTCTTCGATTCTTGATCAAAAATTTTACATATTTTGGCATTCTTTTCCATATAAAAATTTCTG  
CAACTATAATATTAATAAATAACAATTACGAAGGTCAACCAAGTCTAGTCCGATCGTCAACGGTCAACAGTCAAC  
GGTCAACCCGCCCTAGCTGGACTTCGATCCTGGATTGCGCGCTGATTGTAGCTAGTGAACCCCTTCGACTATTAT  
TTATGGGGAACAAGATCACTTTTATTGGAACCCCTTTCGTGCGGATCGGATGTTCAATCCTTTATGATTGAGTTCA  
TTACCACATTTTACCTCATGTTTGTCAATTTCTGGTGTAGCCACAGATAATCGAGCT**GTTAGTT**CATCTTCTTCAT  
CCATTATATTTTTTATTTCATCCATGTTTAGATTTCTGATTGATTTAAAATTTCTATTGTTAATTACTAATTGTCTC  
TATCTAATAATAACAACATTCTTTGTCAACGATGCAGATTGGAGAAGTCAAAGGCATTGCCATTGGAGCTACTCT  
TTCACTTAACATACTTTTTCGCCGGGTACGGCTGATTAATTTAGATAATTGTCCCGTAGCTTAATTTTACACCAGA  
TTGATTCAAGTTCGGATGAATCAACTACTATGAATATTGAGTACGATGAGTTTTGATTAAATGAAGATGAATTTG  
AAAAAATAAATGTGTCAATTTTTTTAATATTGCATGTTTTTAGATGAGATAGTTTAAACAAACAATTTCTTGAATA  
CTTTCATCACACATTTCGAATTTGATACACGATACTCGACATGATTGAAAAATATTAACCTCTAAGGCTTGTTCTGA  
AATGACAGGCAATTTTACGGGCATCACTGAATCCAGCAAGGAGTTTGGGACCAGCAATTGTTTACAATCGCTAC  
GAGGTTTTGTGGAAGTCAATTTCTGGCTCCTATTTCTGGAGCCATAGCAGGTGCTTGGGTCTATAATTTTATCAGA  
TTTACGGACAAGCCCTTTCGTGAAATTATCAAAAAGGGGATCTTCCATTAGAAACGCAGCACGAACCAACTCTACT  
CAAGTATCAAGAAACAAAAAGAGGATAAAATTTTGTATTATTA**TAA**

>OeuNIP1;2\_Oeu040934.1

**ATG**GACGATATGTCTCGAGTCAGTTCCAACCGAGTAGTGTCCATTAACATAGAAGATGATGATTTCAATCAAAAAC  
CCTCCTCCTCCTACATCCACTAACACCAGGAATTCTTCAGGCTGTTCTATTTCTGTATCTTTTCGTGCAAAAGTTG  
ATCGCAGAGTTTATTGGAACCTACTTCCTAATATTTGGTGGTTGCGCAGCCATCACGGTGAACAAAAACATGGAA  
AATGTAGTGACACTTCCAGGAATAGCCGCCGTGTGCGGACTGGTGGTGGTGGTGCATGATTTACTCCGTTGGACAT  
ATTTCTGGAGCACATTTGAATCCCCTGTAAACCATTGCTTTTGCCACCTTCAAGAGGTTCCCGTGGAACAGGTA  
CCAGCCTATGTCTGATCTCAAGCTCTTGCTTCAATTGTAGCCAGTGAACCCCTTCGACTATTATTTATGGGGAAA  
CAAGATCACTTTATTGGAACCCCTTTCGTGCGGATCGGATGTTCAATCCTTTATGATTGAGTTCATTACCACATTT  
TACCTCATGTTTGTCAATTTCTGGTGTAGCCACAGATAATCGAGCTATTGGAGAACTCAAAGGCATTGCCATTGGA  
GCTACTCTTTCACTTAACATACTTTTTCGCCGGGCAATTTACGGGGCATCACTGAATCCAGCAAGGAGTTTGGGA  
CCAGCAATTGTTTACAATCGCTACGAGGTTTTGTGGAATCTACATTTCTGGCTCCTATTTCTGGAGCCATAGCAGGT  
GCTTGGGTCTATAATTTTATCAGATTTACGGACAAGCCCTTTCGTGAAATTATCAAAAAGGGGATCTTCCATTAGA  
AACGCAGCACGAACCAACTCTACTCAAGTATCAAGAAACAAAAAGAGGATAAAATTTTGTATTATTA**TAA**

>OeuNIP1;2\_Oeu040934.1

MDDMSRVSSNRVVSINIEDDDFNQNPPTSTNTRNSSGCSISVSFVQKLIAEFIGTYFLIFGGCAAITVKNKME  
NVVTLPGIAAVCGLVVVMIYSVGHISGAHLNPAVTIAFATFKRFPWKQVPAYVVSQALASIVASGTLRLLFMGK

QDHFIGTLSSGSDVQSFMIIEFITTFYLMFVISGVATDNRAIGELKGIAIGATLSLNLIFAGPISGASLNPARS LG  
PAIVYNRYEGLWNYILAPISGAIAAGAWVYNFIRFTDKPLREIIKRGSSIRNAARTNSTQVSRNKKRIKFCLL\*

### OeuNIP1;3 Oeu039868.1

**Observation:** 5' extended with 792n, Intron/exon readjusted, and 3' truncated of 246n

>OeuNIP1;3\_Oeu039868.1 | chr16:12429791..12432026 reverse **original sequence**

ATGGCTATGGTTTACTCAGTTGGCCATATTTCCGGTGCTCATTTTAATCCGGCTGTGACCATTGCTTTTGCCACC  
TGCAAGAGGTTCCCACTTAGACAGGTGAAGATGGTATATTCAACAGAATTATATGCATTGAACGAACGTGCTCTT  
GATTTCTTCGTGCTCATCCTGATAGGTACCGGCATATATTGCCGCACAAGTGATCGGAGCCACGCTAGCAAGCGG  
TACCCTGAGATTACTGTTTCATGGGAAAACACGATCACTTTGCCGGAACACTTCCGACCGGCTCCGACTTGCAGTC  
TTTTGTTATGGAATTTATAATCACGTTCTACCTAATGTTTGTGCATATCTGGAGTGGCTACAGACAACCGTGCTGT  
AATTCCTTCACCTTATTCTTGGTCTTTTCGAAAGACAACATAGAGTTATCTACTTCATGTTTATAAATTCAGAAA  
ACCGGATTAGCAAGAGATCATGATGGTGATTTTCATAATTTGAAAGGGGTTAAGACAAATGACATCATTTTGACAA  
TGATATGTTTTTTTTTTTATCTTGAAGACGATGAAGAAATCGATGCCTTCTTAATAAATGCTAGCTAGTAGGTTGT  
ATAACTAAGTGTACTCTCGTAATTAATTATAACAATCTGATAGCTGATTATCTCAAAATATATGTAGGTAATTGCA  
GAGGGTTTTGGTACCTACTTCTTGATTTTTTGCCGGTTGTGCCGCAGTGGTGGTGAACGCCGATAAGGAGGAGGTG  
ATAACCCAGCCGGGAATCGCAATAGTGTGGGACTTGTGCGTCATGGCTATGGTTTACTCAGTTGGCCATATTTC  
GGTGCTCATTTTAATCCGGCTGTGACCATTGCTTTTGCCACCTGCAAGAGGTTCCCACTTAGACAGGTGAAGATG  
GTATATTCAACAGAATTATATGCATTGAACGAACGTGCTCTTGATTTCTTCGTGCTCATCCTGATAGGTACCGGC  
ATATATTGCCGCACAAGTGATCGGAGCCACGCTAGCAAGCGGTACCCTGAGATTACTGTTTCATGGGAAAACACGA  
TCACTTTGCCGGAACACTTCCGACCGGCTCCGACTTGCAGTCTTTTGTTATGGAATTTATAATCACGTTCTACCT  
AATGTTTGTGCATATCTGGAGTGGCTACAGACAACCGTGCTGTAATTCCTTCACCTTATTCTTGGTCTTTCGAAAG  
ACAACATAGAGTTATCTACTTCATGTTTATAAATTCAGAAAACCGGATTAGCAAGAGATCATGATGGTGATTTTC  
ATAATTTGAAAGGGGTTAAGACAAATGACATCATTTTGACAATGATATGGATCTTTTTTATCAATCATTTTATGA  
CCTTTCTTTTTTTTTTAATTATTGTTTCGTGCTGCCATGCAGATTGGAGAACTTTTCGGGTTTAGCCATTGGAGCAAC  
TATTTTACTTTAACGTGATGTTTGCAGGGTAAATACTGTGCTCAATTGTCTTGCTATTCTTATATATATAGATACA  
AACTGATCTCCTGCTCATGCCGATGGTTGAACATCTATCTCATGTCCACTATGGGTAGGAGATCAGTTCTACAT  
AAAGATATTGTATTTGACGAAAGCGATTTCAAAAGTGTCAGACAAGCCATCAAGAAAAATAATAGACTTGTTCGG  
ATAGTGATAATCAATATCTTGGGACGTTTTTTGAATTTGCGATCTGTTTCGAATTTTCAAAAATTGTTTTTATG  
TTATAAATTTCAATGTTGGGCTAATGGGTAGTTTTGATGGACAGGCCAGTATCTGGGGCTTCCATGAACCCAGT  
AAGGAGTTTAGGCCAGCAATAGTGTCAAATCGTTACGAGGGAATATGGATATACATAGTAGGCCCGACTTTTGG  
GGCTATAGCGGGTGCTTGGGCCTATAATATCATCAGATTACAGACAAACCTTTACGAGAAATCACCCAGACTGC  
TTCTTTCTCAAGATCTTGGCCCATAACAGGCCCAATTGATAACTTAGGTCTATTTTCTGGATTAATTAGTATA  
GCTTGCTGTATTAGGTAAGAGAAAATTTCTTTCCCATTTTCTGGCTATGTGGCATTGTTATTTTACAAATTCAGT  
TGTGTTCTGAATGAAACCATTTCATTCATCTAATAGGGGGTGAAGCAGGGAGTGAACAGAGTAAATCTGACCTCCA  
TGAGCATTTTATCGAGCAAACCTGCGACGGCTAGTTTTCCAATACTGCAATGCTTCACCTAG

>OeuNIP1;3\_Oeu039868.1 | chr16:12429545..12432818 reverse **Corrected version**

ATGGCTATGGTTTACTCAGTTGGCCATATTTCCGGTGCTCATTTTAATCCGGCTGTGACCATTGCTTTTGCCACC  
TGCAAGAGGTTCCCACTTAGACAGGTGAAGATGGTATATTCAACAGAATTATATGCATTGAACGAACGTGCTCTT  
GATTTCTTCGTGCTCATCCTGATAGGTACCGGCATATATTGCCGCACAAGTGATCGGAGCCACGCTAGCAAGCGG  
TACCCTGAGATTACTGTTTCATGGGAAAACACGATCACTTTGCCGGAACACTTCCGACCGGCTCCGACTTGCAGTC  
TTTTGTTATGGAATTTATAATCACGTTCTACCTAATGTTTGTGCATATCTGGAGTGGCTACAGACAACCGTGCTGT  
AATTCCTTCACCTTATTCTTGGTCTTTTCGAAAGACAACATAGAGTTATCTACTTCATGTTTATAAATTCAGAAA  
ACCGGATTAGCAAGAGATCATGATGGTGATTTTCATAATTTGAAAGGGGTTAAGACAAATGACATCATTTTGACAA  
TGATATGTTTTTTTTTTTATCTTGAAGACGATGAAGAAATCGATGCCTTCTTAATAAATGCTAGCTAGTAGGTTGT  
ATAACTAAGTGTACTCTCGTAATTAATTATAACAATCTGATAGCTGATTATCTCAAAATATATGTAGGTAATTGCA  
GAGGGTTTTGGTACCTACTTCTTGATTTTTTGCCGGTTGTGCCGCAGTGGTGGTGAACGCCGATAAGGAGGAGGTG  
ATAACCCAGCCGGGAATCGCAATAGTGTGGGACTTGTGCGTCATGGCTATGGTTTACTCAGTTGGCCATATTTC  
GGTGCTCATTTTAATCCGGCTGTGACCATTGCTTTTGCCACCTGCAAGAGGTTCCCACTTAGACAGGTGAAGATG  
GTATATTCAACAGAATTATATGCATTGAACGAACGTGCTCTTGATTTCTTCGTGCTCATCCTGATAGGTACCGGC  
ATATATTGCCGCACAAGTGATCGGAGCCACGCTAGCAAGCGGTACCCTGAGATTACTGTTTCATGGGAAAACACGA  
TCACTTTGCCGGAACACTTCCGACCGGCTCCGACTTGCAGTCTTTTGTTATGGAATTTATAATCACGTTCTACCT  
AATGTTTGTGCATATCTGGAGTGGCTACAGACAACCGTGCTGTAATTCCTTCACCTTATTCTTGGTCTTTCGAAAG  
ACAACATAGAGTTATCTACTTCATGTTTATAAATTCAGAAAACCGGATTAGCAAGAGATCATGATGGTGATTTTC  
ATAATTTGAAAGGGGTTAAGACAAATGACATCATTTTGACAATGATATGGATCTTTTTTATCAATCATTTTATGA  
CCTTTCTTTTTTTTTTAATTATTGTTTCGTGCTGCCATGCAGATTGGAGAACTTTTCGGGTTTAGCCATTGGAGCAAC  
TATTTTACTTTAACGTGATGTTTGCAGGGTAAATACTGTGCTCAATTGTCTTGCTATTCTTATATATATAGATACA  
AACTGATCTCCTGCTCATGCCGATGGTTGAACATCTATCTCATGTCCACTATGGGTAGGAGATCAGTTCTACAT  
AAAGATATTGTATTTGACGAAAGCGATTTCAAAAGTGTCAGACAAGCCATCAAGAAAAATAATAGACTTGTTCGG

ATAGTGATAATCATAATCTTGGGACGTTTTTTGAATTTGCGATCTGTTTCGAATTTTCAAAAATTGTTTTTTATG  
TTATAATTCTTCAATGTGGGCTAATGGGTAGTTTTGATGGACAGGCCAGTATCTGGGGCTTCCATGAACCCAGT  
AAGGAGTTTAGGCCCAGCAATAGTGTCAAATCGTTACGAGGGAATATGGATATACATAGTAGGCCCGACTCTTGG  
GGCTATAGCGGGTGCTTGGGCTATAATATCATCAGATTACAGACAAACCTTTACGAGAAATCACCCAGACTGC  
TTCTTTCTCAAGATCTTGGCCCGTAACAGGCCCAAT**TGA**

>OeuNIP1;3\_Oeu039868.1

**ATG**GCTATGGTTTACTCAGTTGGCCATATTTCCGGTGCTCATTTTAATCCGGCTGTGACCATTGCTTTTGCCACC  
TGCAAGAGGTTCCCACTTAGACAGGTAATTGCAGAGGGTTTTGGTACCTACTTCTTGATTTTGCCGGTTGTGCC  
GCAGTGGTGGTGAACGCCGATAAGGAGGAGGTGATAACCCAGCCGGAATCGCAATAGTGTGGGGACTTGTCTGTC  
ATGGCTATGGTTTACTCAGTTGGCCATATTTCCGGTGCTCATTTTAATCCGGCTGTGACCATTGCTTTTGCCACC  
TGCAAGAGGTTCCCACTTAGACAGGTACCGGCATATATTGCGGCACAAGTGATCGGAGCCACGCTAGCAAGCGGT  
ACCCTGAGATTACTGTTTCATGGGAAAACACGATCACTTTGCCGGAACACTTCCGACCGGCTCCGACTTGCAGTCT  
TTTGTTATGGAATTTATAATCACGTTCTACCTAATGTTTGTCTATCTGGAGTGGCTACAGACAACCGTGCTATT  
GGAGAACTTTCCGGGTTTAGCCATTGGAGCAACTATTTTACTTAACGTGATGTTTGCAGGGCCAGTATCTGGGGCT  
TCCATGAACCCAGTAAGGAGTTTAGGCCCAGCAATAGTGTCAAATCGTTACGAGGGAATATGGATATACATAGTA  
GGCCCGACTCTTGGGGCTATAGCGGGTGCTTGGGCTATAATATCATCAGATTACAGACAAACCTTTACGAGAA  
ATCACCCAGACTGCTTCTTTCTCAAGATCTTGGCCCGTAACAGGCCCAAT**TGA**

>OeuNIP1;3\_Oeu039868.1

MAMVYSVGHISGAHFNPAVTIAFATCKRFPLRQVIAEGFGTYFLIFAGCAAVVNVADKEEVITQPGIAIVWGLVV  
MAMVYSVGHISGAHFNPAVTIAFATCKRFPLRQVPAYIAAQVIGATLASGTLRLLFMGKHDHFAGTLPDGLQS  
FVMEFIITFYLMFVISGVATDNRAIGELSGLAIGATILLNVMFAGPVSASMNPVRSGLPAIVSNRYEGIWIYIV  
GPTLGAIAWAYNIIRFTDKPLREITQTASFLKILARNRPN\*

## OeuNIP3;1 Oeu053221.1

### Observation:

Two sequences in tandem at the end of the scaffold 635.

The first, **Oeu053221.1a\_OeuNIP3;1** | scaffold635:392813..394288. Full length sequence.

The second, **Oeu053221.1b\_OeuNIP3;1-related** | scaffold635:402535..403011. Incomplete sequence.

>OeuNIP3;1\_Oeu053221.1a | scaffold635:392813..394288

**ATG**GCAAATTCACCTTCTATTATTAGCTTTTCTCTAAACAAAATTTACCAACAGACTTGTCCATTACAGAGGAA  
GCAAAGGGTTACTCCGCCGACGAATTCCTCCAAGAGATTCTGTTTCCCCGTCGTACTACCAGAAA**GTAA**GTTTT  
**TAAACGATTGCATTTGACAATACAGTATACAAGATTTTAATGGATCATTTGTACTTGAGTTAACAGATTATAGCA**  
GAGATTTTGGGCACTTATGTTCTTGTTTTTGCGGGTTGCGGTGCTGCTCTAGTTGATCGAGAGAAGACATTAACA  
GTTGTGGGTTTAGCAATGGTGTGGGGTTGGCTTTGATGGCAATGATATATGCACTTGGCCATGTTTCTGGTGGG  
CATTTCAACCCTGCAGTTACCATTGGCTTTGCAGCAGCTCGAAAAATTCCTACTCGTTCAC**GTAA**GAATAT**CATTT**  
**GTACACGAAATTTGGATTGTTTCAGTAGTATCCAATCATCTGTTTTGTAACATTGGAATCGTCTTGCAGGTCCCGT**  
TGTACGTTTTATCGCAGTTTTTGGGTTCAACGCTAGCATGCCTCACCTGAAAGTACTATTCAATGACCAAGCTG  
ATATACTACCCACTCTCACTCATTATTCCAGTTCAACTACTGATCTTGAAGCGATTACATGGGAATTCGTCATCA  
CTTTCATTTTTATGCTCACGATACGTGGAGTAGCTTCTGATGACAGAGCA**GTATGTATTTCTCGTTGTGATACCT**  
**CTATATTTAGTTCTTGCATGGTTTTATCTAAGCGTTATTGATACTTTTCAACCATCTTCTTTCATAATCTATAAC**  
**AGATCACTTCAATTAAGTATTTTGCATTTTGGTTGATGAATCAGAATAATGAAGTGGCTGGAGTTGCAATTGGA**  
GCTACAGTGATATTTAATGCCCTTGTTGCAGGGTAAGACTTCCCATCCACAAGCTTCATGCATGTTTTGCTAAG  
CTTAAAAGGTTAATAAATATATAAATTTTAAAATAAATAATTTTTTTGTTGTTTCATAAGGGAGATGAAAGTAAGA  
AAAAAGTAACATATTTTATCTTATTTGCATAAGCAGTAACACAAAATGATCCCACCATTCTGCACTATTCTTCT  
CTTAATATGAAGTTCTAGTAACGCTTTCCATCATGTAATCGAAATTGCAACACAAGAAAATAGAAAAGATAAGGG  
AACCAGAATAAAGGGAGTTCTTAAATATACTTATATAGGTGAATTGAAAAAAATGCAGCGCTATTACTGGAGCT  
TCTATGAATCCTGCAAGAAGCATGGGTCCAGCAATAGTTTCTGGAGTCTATAAAAATCAATGGGTGTATGTTGTT  
GCTCCCATTCTTGGAGCCATAGCTGCAAGCCTGATATACAGTCTTCTCCAGCCATGGAAGCCGAAAAGCATAGA  
GAGAGTGCTAGAAGTACATACAATGATCTATATCTACGTCCCCGAGGTA**TGA**

>OeuNIP3;1\_Oeu053221.1a

**ATG**GCAAATTCACCTTCTATTATTAGCTTTTCTCTAAACAAAATTTACCAACAGACTTGTCCATTACAGAGGAA  
GCAAAGGGTTACTCCGCCGACGAATTCCTCCAAGAGATTCTGTTTCCCCGTCGTACTACCAGAAAATATAGCA  
GAGATTTTGGGCACTTATGTTCTTGTTTTTGCGGGTTGCGGTGCTGCTCTAGTTGATCGAGAGAAGACATTAACA  
GTTGTGGGTTTAGCAATGGTGTGGGGTTGGCTTTGATGGCAATGATATATGCACTTGGCCATGTTTCTGGTGGG  
CATTTCAACCCTGCAGTTACCATTGGCTTTGCAGCAGCTCGAAAAATTCCTACTCGTTCACGTCCCGTTGTACGTT  
TTATCGCAGTTTTTGGGTTCAACGCTAGCATGCCTCACCTGAAAGTACTATTCAATGACCAAGCTGATATACTA  
CCCACTCTCACTCATTATTCCAGTTCAACTACTGATCTTGAAGCGATTACATGGGAATTCGTCATCACTTTCATT  
TTTATGCTCACGATACGTGGAGTAGCTTCTGATGACAGAGCATTGCAATTGGAGCTACAGCCTATTACTGGAGCT

TCTATGAATCCTGCAAGAAGCATGGGTCCAGCAATAGTTTCTGGAGTCTATAAAAAATCAATGGGTGTATGTTGTT  
GCTCCCATTCTTGGAGCCATAGCTGCAAGCCTGATATACAGTCTTCTCCAGCCATGGAAGCCGAAAAGCATAGA  
GAGAGTGCTAGAAGTACATACAATGATCTATATCTACGTCCCCGAGGTA**TGA**  
>OeuNIP3;1\_Oeu053221.1a  
MANSPSIIISFSSKQNLPTDLSITEEAKGYSADFFPPRDSVSPSYQKIIAEILGTYVLVFAGCGAALVDREKTLT  
VVGLAMVWGLALMAMIYALGHVSGGHFNPAVTIGFAAARKIPLVHVPLYVLSQFLGSTLACLTLKVLFNDAQDIL  
PTLTHYSSSTTDLEAITWEFVITFIFMLTIRGVASDDRALQLELPITGASMPNPARSMGPAIVSGVYKNQWVYVV  
APILGAIAASLIYSLLOPWKPEKHRESARSTYNDLYLRPEV\*

## OeuNIP3;1-related Oeu053221.1b\_

>OeuNIP3;1-related\_Oeu053221.1b | scaffold635:402535..403011 forward  
**ATG**GCAAATTCACCTTCTATTGTTAGCTTTTCCTCTAAACAAAATTTACCAACAGACTTGTCATTACAGAGGAA  
GCAAAGGGTTACTCCGCCGACGAATTCCTCCAAGAGATTCTGTTTCCCCGTCGTACTACCAGAAA**GTAAAGTTTT**  
**TAAACGATTGCATTTGACAATACAGTATACAAGATTTTAATGGATAATTTGTGCTTGAGTTAACAGATTATAGCA**  
GAGATTTTGGGCACTTATGTTCTTGTTTTTGCGGGTTGCGGGGCTGCTCTAGTTGATCGAGAGAAGACATTAACA  
GTTGTGGGTTTAGCAATGGTGTGGGGGCTGGCTTTGATGGCAATGATATATGCACCTGGCCATGTTTCTGGTGGG  
CATTTCAACCCTGCAGTTACCATTGGCTTTGCAGCAGCGCGAAAAATTCACCTCGTTCACGTAAGAATATCATTT  
GTACACGAAATTTGGATTGTT**CAGTAG**  
>OeuNIP3;1-related\_Oeu053221.1b  
**ATG**GCAAATTCACCTTCTATTGTTAGCTTTTCCTCTAAACAAAATTTACCAACAGACTTGTCATTACAGAGGAA  
GCAAAGGGTTACTCCGCCGACGAATTCCTCCAAGAGATTCTGTTTCCCCGTCGTACTACCAGAAAATATAGCA  
GAGATTTTGGGCACTTATGTTCTTGTTTTTGCGGGTTGCGGGGCTGCTCTAGTTGATCGAGAGAAGACATTAACA  
GTTGTGGGTTTAGCAATGGTGTGGGGGCTGGCTTTGATGGCAATGATATATGCACCTGGCCATGTTTCTGGTGGG  
CATTTCAACCCTGCAGTTACCATTGGCTTTGCAGCAGCGCGAAAAATTCACCTCGTTCACGTAAGAATATCATTT  
GTACACGAAATTTGGATTGTT**CAGTAG**  
>OeuNIP3;1-related\_Oeu053221.1b  
MANSPSIVSFSSKQNLPTDLSITEEAKGYSADFFPPRDSVSPSYQKIIAEILGTYVLVFAGCGAALVDREKTLT  
VVGLAMVWGLALMAMIYALGHVSGGHFNPAVTIGFAAARKIPLVHVVRISFVHEIWIVQ\*

## OeuNIP4;1 Oeu047418.1

>OeuNIP4;1\_Oeu047418.1 | chr18:8000311..8001846 forward  
**ATG**GCAATCGAAGAAATGGAAGAAGGAGTAGACACCTCAACGTTCAATGCTAAAGAAGGCTTCTGTATGTCGGCT  
TCAATCGTAACTATCGTACAAAAGGTTAGATCTCGTAACATTT**CACCTTGAAAACTTTTGGGACGTTCTCTACAAT**  
**CTTCGATTTTTT**CATATTTATGCATAACATGTCACTTTCAATCTTGTTTCGGTCGAGCATGCAAAAAAATGTACTAA  
**ACGTAATGTGTTAGATGTTTTCCAGGTGATTGCAGAGGTGATTGGCACGTATTTTGTTATATTTTCGGGGTGTTG**  
CTCTGTTGCGGTGAATAAATTGTATGGTGGGACGGTCACATTTCCAGGCATTTGTGCGACATGGGGACTAATTGT  
GATGGTCATGGTCTACTCCGTAGGTCACATATCCGGGGCTCATTTTAACCCTGCGGTCACCATTACCTTCGCCAT  
CTTTCGCCGTTTTTCCATGGAAAGAG**GTACCGATTAATACAACAGACATGTTTAATATGTTAGATCGATTT**CATGT  
**ACATACATACACGTATGGGCAATTATGATGGTTTAAGTAAACGGGATGAGAATTGATAAGTTTGAAATGTGATA**  
**ATATCGTGCAAGAAATTCGTGGGTTTTTGTTATCATTTATTATGTTCCATATTGCATATTAAACAAAAAGATGTA**  
**TTGTTTTGTATTGATAATTTAAATCATAGTTATTAAACACGGATTGAACTGATTTTCTTTTAAACTGTGCAACTC**  
**GAATCATCGTAGATACAGTAATGTTCCAAGATTTGCAGGTTCCATTGTATATAATAGCGCAATTGATTGGATCGA**  
TCCTTGCGAGTTGTACTTTGGCTATCTTGTTTGACATCACCTCTGAAGCTTACTTTGGCACCTTGCCCGTTGGAT  
CAAATGGGCAATCTTTCCGCATAGAAATCATCATCTCCTTCTTGATGTTACCATTTCTGGCGTAGCAACAG  
ATAGTAGAGCGGTATGTAACATCAAAAAACATACATGACGTATTGGTAAATGACTTAATTTTATTATTTAGATG  
**CTCTAAATTTT**CATACTTCTGAACGAGCTGCCCACGTAATTTTCTGCTTGCTTAACCTAATTTGTTTATTTATTTT  
**CCTTTTGAACATAGATTGGAGATCTTGCCGGTTTAGTCGTTGGGATGACTATAATGTTAAATGTGTTTCGTTGCC**  
**GGGTACGTTAATGTCTCAATACTGTGTTTTGTTACGGGATTGGACAATATAAAAAATAATAATTATAATAATAA**  
**ATCAACAATATTTTATTTTAAATTTTCTATTTCGATCTGCAGGCCGATTTCTGGAGCCTCAATGAACCCAGCAAGG**  
AGCATAGGCCCAGCCATTGTGAAGCATACTTATAAAGGACTCTGGGTTTATATATTTGGCCCACTTATTGGGACC  
ATACTTGAGGATTTGCTTATAATTTGATTAGATATACGAATAAACCCCTTCGTGAATTAACATAAAAGTAGTTCA  
TTAATCAGAAGCATATCCAAAAATAATACA**ACTTAG**  
>OeuNIP4;1\_Oeu047418.1  
**ATG**GCAATCGAAGAAATGGAAGAAGGAGTAGACACCTCAACGTTCAATGCTAAAGAAGGCTTCTGTATGTCGGCT  
TCAATCGTAACTATCGTACAAAAGGTGATTGCAGAGGTGATTGGCACGTATTTTGTTATATTTTCGGGGTGTTGGC  
TCTGTTGCGGTGAATAAATTGTATGGTGGGACGGTCACATTTCCAGGCATTTGTGCGACATGGGGACTAATTGTG  
ATGGTCATGGTCTACTCCGTAGGTCACATATCCGGGGCTCATTTTAACCCTGCGGTCACCATTACCTTCGCCATC  
TTTCGCCGTTTTTCCATGGAAAGAGTTCCATTGTATATAATAGCGCAATTGATTGGATCGATCCTTGCGAGTTGT  
ACTTTGGCTATCTTGTTTGACATCACCTCTGAAGCTTACTTTGGCACCTTGCCCGTTGGATCAAATGGGCAATCT

TTCCGCCATAGAAATCATCATCTCCTTCCTCTTGATGTTACCATTTCTGGCGTAGCAACAGATAGTAGAGCGATT  
GGAGATCTTGCCGGTTTAGTCGTTGGGATGACTATAATGTTAAATGTGTTTCGTTGCCGGGCGCGATTCTGAGACC  
TCAATGAACCCAGCAAGGAGCATAGGCCAGCCATTGTGAAGCATACTTATAAAGGACTCTGGGTTTATATATTT  
GGCCCACTTATTGGGACCATACTTGGAGGATTTGCTTATAATTTGATTAGATATACGAATAAACCCCTTCGTGAA  
TTAACTAAAAGTAGTTTATTAATCAGAAGCATATCCAAAAATAATACAAC**TAG**

**>OeuNIP4;1\_Oeu047418.1**

MAIEEMEEGVDTSTFNAKEGFMSASIVTIVQKVIAEVIGTYFVIFSGCGSVAVNKLYGGTVTFPGICATWGLIV  
MVMVYSVGHISGAHFNPAVTITFAIFRRFPWKEVPLYIIAQLIGSILASCTLAIFDITSEAYFGTLPVGSNGQS  
FAIEIIISFLMFTISGVATDSRAIGDLAGLVVGMTIMLNVFVAGPISGASMNPARSIGPAIVKHTYKGLWVYIF  
GPLIGTILGGFAYNLIRYTNKPLRELTKSSSLIRSISKNNTT\*

**OeuNIP5;1 Oeu020545.1**

**>OeuNIP5;1\_Oeu020545.1 | chr18:6958376..6972407 forward**

**ATG**CCGGAATTCGAAGTCGAAACTCTGACAATGTCGGCGCCAGCGACGCCTGGAACGCCGGCGCCACTGATTCT  
TCTCTGCGAATAGACTCAGTTTCTTACGATTGGAAGTCAATGCCACGATGCAAGTGCCAGTTGATGCACCC  
ACTTGGGGTGCACCACATACGTGCAGCCTCACCGATTTCTCTGTGCCTGACATCCCTCTTACTCGCAAG**GTTAGA**  
**CTTTACACTCTCTCTATCTCTCTCTCTCTCTCACACACAATATAATATGAATATATATTTTTGTTTTTTAAAT**  
**TTATTATGTGGAGTGAGTGGGGTCCTTAACCTTTCAGTTGCCTTTCAAATTTTCTGTATTGAACAATGATGAGTC**  
**GGTTGAATGAATTTATAATTGAGTTTTGATACTCAAACAGCTGCTGTCACGGCCCTGTCACAGTAGCGTAACCTT**  
**TTATAATCAGGAAATTTATGTCATTTCTATATCATCGTGACATTTCTATCATTTTTTTTACAAATTTTAACACTC**  
**TTGTGACGTGGTGAGTGATAAGCTACATAGCATTTATGTGAAACATATGTTGTAGTATGACTATCAATTAATTA**  
**ATTAATTTTTTTTTTTTTTTTTTTTTTTTCAAATGTTGTGAAACCTGAAACCAAATTTGAATTCATGATTCAATTGAA**  
**ACAAATTTGAAGTTAATTAACCCAATTGAACAATAATTGAAATTTGATTGCCCAATTGAGAATCTGAGATGATGT**  
**GAAAGTTNNNNNNNNNNNNNNNNNNNNNNNNNNNNNNNNNNNNNNNNNNNNNNNNNNNNNNNNNNNNNNNNNN**  
**NNNNNNNNNNNNNNNNNNNNNNNNNNNNNNNNNNNNNNNNNNNNNNNNNNNNNNNNNNNNNNNNNNNNNN**  
**NNNNNNNNNNNNATATATATATATATATATATATATATAGATGATAATTTGGACCAGTCTGGGCCCCGATATTGGCAG**  
**GTCCGTGGGCTGGGCCTCACCTTAATCGGACCTAATTGTACCCTACACATCCATTTTGAAACTATTGCTTCCCGT**  
**TGTCTCTTCTATTATCTTTATTCATTATTGGATAGTGATAAGTTAATGAGGGGAAAAATTCATAATTACAAATGT**  
**TTTGAATATAATTTCAAAAATAACAACTCGTTTAAAAAAATTCAAAATCAAGTGATCACATTTTATGTTAT**  
**TACGTATAATTTAATTATACGGGTCCCAATAATTTATGGTCATGTTCTCACACTAATCACAAATAATACGAAGTC**  
**ATGGTCATACAAGACAAAAAATGTGTGCTACAATTTCATATGTAGTCGCATTGCCACATTTTATAGGTCATAA**  
**ACTAATTATTAGTACAAATCATCCAATAACTGGCTACAAAACATTCATTAATTGTTTACAAACTATTTCACA**  
**TCATCTCACTCCACATCATCCTATCCCATCGCTTCTCTCTAATTTAGGGATATCAACAAGTCGGGTCCGATTAGG**  
**ACAATATTCTCTTCTCTCGTCTTGTTGAGTAGTTTTATTACCTTACCCCGTCTTCATACACAGTTAAGGCGAGG**  
**TTGGACAAGCTGGCTCCTTGTCCTATTTATATTTTATTTTTTTCATATCTTTAATTGGTAAATATTATTATCATT**  
**ATTTATTTTTTTTTCAATTTGTTAATAACACCCATGTTTCTCTAAAAACGATGATGATATTTTCTTTTACATG**  
**ATAAAAGTTTTAAATTTGAAATGAATTTTAGACAAGCAGGATTTATGTTCCCCAAACCACTCGGGGCAATGACCC**  
**TCATTGTCCCCACCTCATGTACTAAGCCCCGTTTGATTATCGTTGTTTGATCACAAAAATAAAAAATATAATC**  
**GCTATTTATTGTATTAAGTTACTATATTTGACTTTTTATCTTTTCGATAGTTTTTCATTATCATTTCTACAAAAAT**  
**AATACCAAATGGGACCTAAGTAGGGAACCTCCATGCATTTGGGGCGAGGTCCAAGCGTATAAGCTTTTTTGCCAT**  
**CCTTAATCTCATTCTTCACCCGCTTTCTCCTCCGAACCTACCACCGGCAGCCACTGAGTTTTTTTCTCACACCGGT**  
**CGACAATCACAGAAAAAATAAGTCTACAATTACCGGCAACAACCATAGAAAAACAGATATCCAGTCAATCACAA**  
**ATCCACCTCATAGTGACGACGCTACCACAATATAGAAAGACAGATCTACAGCCACATCACAAACCCACCTCAT**  
**CGCGGTGGCGCCACCAACATCATCCCGCATTTTACCCTTTCCACAACGTCCTTCCATTTTTTATTTTCGCATC**  
**TGCATTCTACACAACCTGACGGCACAGACACAAAAATCACCACCAACCACGTTGATAGAGTAGGAACCTGCACGGGC**  
**GCTGTGATCTAAAAGTCAACACCACGGAAGACGGAGCGGCAGAAATGAGTAAATATGTGAAATTTTAGGATTAG**  
**AGTTTAGTTATTTGGGATAAGCGGAGTAAATCTGTGACGAATTTAGGGGGCAAAATGGGAAACTAAAGAGTTTAG**  
**AGAAGATAGTGGTGGCACTTGAGGATGGCCATAGCTTTTTCCACAATTAGCCCTTGTTTGAGCCATATTATTTTT**  
**TTTGAATGCATTTTTGAATAATGTATTGATGAAAAATGTGTGATTAAAAAATAAAATAAAATTTTGAATTTGCG**  
**TGTAATATTATTTTATTGAAAAATGTGCGATTGAAATGATATTAAATCACTATTTAAGAATATATATTTTTTTT**  
**AAATGTGGCTCAAACATACCTTGACACCGTCTGACATAGAAATCCGTTATAAATGTGAGTAGGTGAGGGTAATGT**  
**GTATTTGTTAATGGAGGAGAATATTGGAGTTAAAAAATCAAATTTGTGCAGTTTTTGAAGTTCTATAATGATTTATG**  
**CAAGGATTAAGATGTTTGCGCCGAGGGGTAATCGAACTGTGTCTCCCTTCACAAACATGCAGGCCCCGCCCT**  
**TATTAATAAATCAAGCCGTGGTTTCCACCTCATGTTGTGTGTAGTAGATAAAAGGTTATATAGATGATTATGTA**  
**CGTGTAGTATGACCTTTATTTAGGATTAGAATTTAGTTATTTGGGCTAAGAGGAGTAAATCGTGAGCTCACGAG**  
**CCACGAGCTGTGCGCAACTCGTCACTCCACATCATCCTATCCCATCGCTTCTCTCTAATTTAGGATATCAACA**  
**AGTCGGGTTCGATTAGGACAACCTATTCTCTCTCTCGTCTTGTTGAGTAGTTTTATTACCTTACCCCATCTCCAT**  
**ACACAGTTAAGGCGAGGTTGGACAAGCTGGCTCCTTGTCCTATTTATATTTTTATTTTTTTTCATATCTTTAATTGG**  
**TAAATATTATTATCATTATTTATTTTTTTTTTCAATTTGTTAATAACACCCATGTTTCTCTAAAAACGATGATGAT**  
**ATTTTTCTTTTTTACATGATAAAAGTTTAAATTTGAAATGAATTTTAGACAAGCAGGATTTATGTTCCCCAAACCA**  
**ACTCGGGGCAATGACCCTCACTTGTCCCCACCTCATGTACTAAGCCCCGTTTGATTATCGTTGTTTGATCACAA**



AAATAAAAAATATAATCGCTATTTATTGTATTAAAGTTACTATATTTGACTTTTTATCTTTTCGATAGTTTTTCATT  
ATCATTCTTACAAAAATAATACCAATGGGACCTAAGTAGGGAACCTCCATGCATTTGGGGCGAGGTCCAAGCGT  
ATAAGCTTTTTTGGCATCCTTAATCTCATTCTTCACCCGCTTTCTCCTCCGAACTACCACCGGCAGCCACTGAGT  
TTTTTCTCACCACGGTCGACAATCACAGAAAAATAAGTCTACAATTACCGGCAACAACCATAGAAAAACAGAT  
ATCCAGTCAATCACAAATCCACCTCATAGTGACGACGCTACCACAACATAGAAAAGACAGATCTACAGCCACAT  
CACAAACCCACCTCATCGCGGTGGCGCCACCAACATCATCCCGCCATTTACCCCTTTCACAACGTCTCTTCCA  
TTTTTATTTTCGCATCTGCATTCTACACAACGACGGCACAGACAAAAATCACCACCAACCACGTTGATAGAG  
TAGGAACCTGCACGGGCGCTGTGATCTAAAAAGTCAACACCACGGAAGACGGAGCGGCAGAAATGAGTAAATATG  
TGAAATTTTAGGATTAGAGTTTAGTTATTTGGGATAAGAGGAGTAAATCTGTGACGAATTTAGGGGGCAAAAATGG  
GAACTAAAGAGTTTAGAGAAGATAGTGGTGGCACTTGAGGATGGCCATAGCTTTTTCCACAATTAGCCCTTGTT  
TGAGCCATATTATTTTTTTTAGAATGCATTTTTGAATAATGTATTGATGAAAAATGTGTGATTAAAAAATAAAAT  
AAAATTTTGAATTTGCGTGTAATATTATTTTATTGAAAAATGTGCGATTGAAATGATATTAAATCACTATTTAAG  
AATATATATTTTTTTTTTAAATGTGGCTCAAACATACCTTGACACCGTCTGACATAGAAATCCGTTATAAATGTGA  
GTAGGTGAGGGTAATGTGTATTTGTTAATGGAGGAGAATATTGGAGTTAAAAAATCAAATGTGTCAGTTTTGAAG  
TTCTATAATGATTTATGCAAGGATTAAGATGTTTGCGCCGAGGGGGTAATCGAACTGTGTCTCCCTTCACAAAC  
ATGCAGGCCCGCCCTTATTAAATAATTCAAGCCGTGGTTTTCCACCTCATGTTGTGTGTAGTAGGTAAAAAGGTT  
ATATAGATGATTATGTACGTGTAGTATGACCCTTTATTTAGGATTAGAATTTAGTTATTTGGGCTAAGAGGAGTA  
AATCATGAGCTCACGAGCCACGAGCTGCTCGCGAACCTCGTGATTTTTATTTTTTTATTTTTTTTCACATTTGTGG  
ACCTTTTTTTTCATAATTTTTTCATATTTTTTATGAGCCCCAGAGCTCAGCTCAAGCTGTGGGATTGAGCCCC  
TACTCAACTCGTGCTCAGGCTCGGGCTCGTTTTATCCCACGAGCTGGGTTTTGACTAGCCGAGCGTTTCGAGCCGC  
TCGGCATGTTTGACATCCCTACCTTTATTCAATAAGTGGCATAATGGTTGGGGTAGGAAGTGGGGTCTAATGGAG  
AAAATCTTCGGTGAGGTGATCGTATTAGCGCATGTGGAATGTCCACCCTAACATAGAACGGCAGGTGTACAATTT  
TAAGTGGGTGGTAAATATTGCTGTCTTACTTTTTCTGATTTTTCTTTTTTATTTTATATTTTTGAAAAGG  
GCTAGAAACCACCCCTCGTTAAACTGGAGTAACAGAGAAGTTGTCTTGAACAAAATAGTAATGCACTCTTAATA  
TACAGTAATGTCAAAGCAAAAACACCTTCATTAAAGAAAACGATATTTAATATTGTCTAAAAATCGGAATAGTGT  
AATTCATTTTATCCATTGAAATTTAGCAAAATTACACATAAGCTTCTTTTTATCTTCTACCATAACTTCAATCAA  
TTGAAAAATGTATACAACTAATAAATGAAAGGAAAAATTGCGACAGTGGTCCCCTAACCTTTCACTTTTTTGCAA  
ACTTTACTCAAACATTTCAATTTGTGATAACGAAGATCTCCAACCTTTCAAAAAATGTAGAGCAAAGGTCCAAATGG  
ACGGTTTTTCGATTTTTTCATCCATTTGACTATTAGTTGACCAAGAACAATAAAATTTTGACCAATTTTGACTAAAT  
AAAAAGGTGAAATAGTAACTTGATAATTACCATAATTAATAAATAAACAAAAAATTAGGGAAAAATAAAAAAAC  
AAAAAGATTAATAAAAAAAGAAAAAGAAATAAAAAATGTTGTCTCCTCCAGCGCCCTGCCCCACTCCACTTTA  
CTCCGTCTCCACATCTCTACGTCTATCCACCTCCTTCCCTTCGAAATCAGCCACCAGCATGCCACCTATCTGTC  
GATAACATCGCCAAAAAATCAATAACACGCCCTGCTGGCAACATCTCCTTCTCACACCCATCACCAAAAAATCCAA  
TATATATACCCATACTCCTTATACTTAATCAATTTTTTATAATGCCTGTTATAAAATATATATTAGAAAAATGAACA  
AATTTCTCCCAAACCTCAAGATCTTTCAACAATCGTTTTATTGCCTAGATCTGCAATAAGCAATAATAAAGGCGT  
CAGCTGAGATTAAAAACTTGCCATTTTCTTCCATTTCTTTCGTGAATAAAATCAGCCTCAAACTAGAACGGTGT  
TTTCTGTGATTTCCAACCTTAAATCTTAACAATCAACAGATCAATTTAAAAAATGTTGAGGTGGGGTTTTTT  
GTTTTGGGTGTAGGTTTGATGGTAATGGTGGTTGTTACCATGCAACTCTTACTCAATGGTTGGGTGGGGTTTTT  
GGTTTAGTTTTGATAGTAGTGGTGGCAGTTTGTTTTTGGTAACTGTAGCTGATCGACAGGATGTGGTAAAGTGGG  
GTGGCTCTAGCTATTGACATTGCTAGTTACTGTGGGGATGGGGCTGGGGCTGGGGTGGTTGGAGGAGAT  
AACATTTTTTCTATTTTTTGGTTCTTTTTCTGTGATTTTTTTGTTCAATTTATTAATATGGTAATTATCAAGTTACC  
ATTTTTAAATTAGTCAAATTTATTTTTCTTGGTCAGTTAACGGTCTAAGGATGGAATCGTCCATTTGCACCTCT  
GCTATAATTTTTGAAAGATTAGGGACCGTCCCTGCTACAAATTTGAAGGTTAGGGTAAAGCCTGTAAAAAGTGAA  
AGGTTAGAGACTGCTTACTGCAATTTTTTCTTAATAAAATTTACAATCCAAATTCATTTGTACAAAATCTAGAAT  
TCATCAAACACATTTTATTTAATAAAGCTCATACCAGTGTATATCAAAATTTTCGCTATGATGTCATTAATCTT  
TTCTTTGCTGGTCATCAAACTATAATAATAAATGAGAAAAAATATATCAGTCAAGTAATCATATCGTTGTG  
GTCTTGAAGCATGTTTGAAGGTGAAAATTTGAACGCTCAAGAGCTAAGTGATGAATAAACAGATTAAAGATAGT  
TCATGTAGGCAAAAAATATTGCGTAAGGTGTGCCACCATTATTTTAATGACGTTCTTCATTTAACGTAACCTGATC  
ATCATAAATGACAATAACTGTTATATTATTTAAGAATTGAGTAAGGGTAATTATTGAGGAAAAAATATATCATA  
TTTTAACTTTGCTAAAACATTTTAAGTTAAAGCAAAGTTAAAATATGATAATTTTATTTACCCCTTTTTTAGCAA  
GGTTAAATGTTTTTAGCAAAGTTTGTCCATCTCTTACTTCAATCATTTCCCCCTTTTCTCTTTGCAAAATAATTC  
TCATGTTTTTTTTTGGTAAATCCAACATTTTAATCTTCACCAACCGCATTTGTGAAATAAAATCATGATTTTTTT  
TTGTCATATAATGGCATTAACCATGCAATTAACGACATCTGCTTAAGCATTAGACACTTTACGTCTTGATCTGAG  
AAATTGTCTTTCTTCAGGTCTAGCAAGTTCATGGTTATGATGAGTATTGATATGAGAAATTATCCATATTCACC  
GCTAATGCAAAACGACCTTAAATTTGCAACCTATTCTTGTCTCTAATCTATTATATATCCTCACAATCAAGTTA  
CTATCCACTCCCTTCGAGACCTTTCAATTTGAACATAAAAAATTCGTCGTTAATATTTTTTATGCAACTCTTCGA  
ATATGCCCTTTGCGAATACTAAAACCTTTTTCTTATAGCATATGAATTACATATACTATAAGCTTCTTCATCAAAA  
CATACTTACACGTTGCGTTTTGTACCCAAATTAGGGTGAATTTTTTTTTTAGAAATAAATATTTTCTTATTTCCATG  
TGAAAAAATTTGTTTCTTATATTTTACGTGATTTTTATGAAAAATATATTATTTCTTATTTCCACATTATTTACA  
TCTTTATGCGATGACATGTACCTATAAATACTGATCTTCTCTTTTCAGTTTTATTCAAACAAGAATTGTTAAGTTC  
TTGTATTTCTTCCCATATTGTGCGATTAATAAAAAACGTCGTGCTTTTGTGATTAACCTCTTGTAAATCTCTCT  
ACTTTTAAATCTTGTCTCTGTTGCAATCTTCATTACTTCATATCGCGTCATTAATCTCATTCACTACAATCCTT  
TCGGGTCCAACAAATGGTATCAGAGCTTGGATCTTGTGTGGATTGGTTAAAGTTTTTTCAGAGATGGCTGCTTTG

AAGTATGATATTCCATAATTGAATCGCAATACAAGGTTTTCTTTGTGGCAAGTAAAGATGAAAGTTATTTTGGCA  
CAGTTAGATTTGGATGATGTGTTGCTGGGTTTTAAGAAGATACCAGCTAATTAGACAACGGAGGAGAAACAACAA  
AGGGATCAGAAGGCTTTGTGCTTGATTCATTTTTCATCTATCCAACAATATTCTGCAAGATGTCTTGAAGGGAAAA  
ACAGCAGCTGCTTTATGGTTGAAACTGAAGCAGTTTTGTATGATCAAGAGTCTTGCTAGGAACTGGCTCTAAAG  
CAGAAGCAGTGTTTCTATCGCGTGGCAGTAGGAGAATTGTTGGAAGACCATATTGCTGTGTTAAAGGAAATTATC  
GCAGATTTGGAACATTGGAGGTTAAGTGCATATAAGATGATCTTGCCCTAATCCTATTATGTTGCTGTCTGGC  
TCTTATGCGTCGTTTTCGGACTCCATTTTGTATAGTCGAGATACTTTAACTATAGACGACGTCTATGATGATTTG  
CACTTAAAGAAGAAGTTGAAGTATTTGGTTGGAGCTACATCGAAGGATGAGGAAGCTATTGTATCTCATGGTGGT  
CGACAGAGGGGCGGATCGAAGAATAACAGCAATTTTTTTTTTGTCTTCTACTACATACATAAGGGGGGACATATTG  
GAAGGATTGTAATAAATTGCAAGCTAAAGGTGATTTAACTACAAATCGTAGAGCGCAACCTTTGACTTCATATGA  
AACAAATACAGTTGAGGATTTTTTCAGACGACAGAGATGTGATGTTAATTGTAATATTTGACATGGAATCTATGCT  
CGATGCTTCAACTTTAAGGTTGCAAACCCAAGTGCATGTTGTCTCAAGTAGTAACTCGAAATTTGAGGTCAAA  
CCATAAAGAATTGGAAGGAAATAAACTATTCTATGAGTGGTGAACAGTTGGTGGAAATACGATGGAGAAGAACAC  
TAGAGTGTTGAGGATTCACCTTCGGATAAATGAGTAGAATTACTCTTGATCTTCTATTTAACTCATATGAAATATG  
GAAGATAAAACATTGATTGCAAATATACTAAAAGATAGATCTTGATAATTATTTGAGGGGAAAAATATGTCAAAAATA  
AGTTGTTGGAATGTAGAGATTATCTAAGCATTTATTGTGTCAAAATTTGTCAACAATAAAATCAAAGCCTTTAAACA  
AAGCAAACTGTTTATAGAACATATACTTCAACCAAGCAAGAAGATGAATATTGAAGAACAAAGTGAAAAATCGA  
AGACAATACTACGCATTACCCAAAGTTTTACCCCTAGCTCTAGCTAATGGTTTAGAAATACATAATGAAATGTTA  
CAAAAAAATGAAGGAACTAAAAATATGATGACGAGAAGTAATGATGCTCCAAAATCTTGGCACAAGGTCCCTTTTAC  
AGGCAAAGAATAATCCAAAATGCAAGTGGACAATGCAACTTGTTTTCTGTCCAGTTTTTAAGACAGTTGTAACATGC  
AACTTGATGCCAATTTTTAGATACTTTGTGCAATGAATTTAGACTTATGATCGATAGAAAAATGTTTTCCACTTG  
AGTTAGCTTTCCATTGGTGTAAATATCAGGTCCATAGGATCTATATAACTCTAGATATGGCCAAAAACAATGAGTG  
CTGCTTCACAGGTAGAAAAGTTGTATCCGGTAGGTAACAACTGGACTTTACACAGTAATTTTGGCTACCTTATG  
ATACAAATTTGACTTCTTGGTAAGCATAAAAAGTTGTAGATACATATCATATCTTTCTAATCCAATGAAATCACC  
TTGTTTTCGATAGCTACAACCTCGAGTTATGACTATTTTACCGAGACAGCTGTATCTTGCTCAAGACAGCTAATCAT  
TTTTTTACTTTTTCAACATATTTTCTCCACTTGCTCCACTTGTTCTATCTTGGAATAACATGTGAAATATATCGAA  
TAAATACTCTTTCAAAGTATAATACTCATGCCAATATGTATTTAAATACGTATTTCAATTAATTGCATTTTTTAA  
CCATGTATTTATGGAATTTGAATTTACAACAAGAGAATTGAAATTAAGACTAACATTAGTGAATTTAAACAAT  
TGAATGTAAATGTCTTGTAAATTGTATATCTTTGAAGCATTTTTTCGACAATAATCACCTGACGAGGAGTGAATC  
CTTGATTTCGACATGTTTCGCATCATATATTTTCCAATCAAATTTCTTTTCAGACATATGAGGCTGTCAAGTAAGGT  
CGAGTTGTGATAGGAAACAACAGTCTTGTGCTGTTGATGAAATCGGTGAGTCGAGTCAGATTAAGACTGCGAGATGGG  
ACAGTCAGAACAAATTGATCAGGTTCTGCATGTTTCCAGACTTGGAAAAGAATATCATCTCACTTAGTACTTTGGAT  
GCAAAATGGTATAAATTCTCTAGTGGGAGTGGGGGTGGGGTGGGGTCTGAAAGGTTCAAATGGGAGTCCGAATTA  
TATTGGAGAAACAGAAGAAGTCTCAGTTGTGTATCTTGCTGGAAGCGCAGAACTAGTTAAAAAGATATCGAGACAA  
GTTCACTACTGTGGTAGATATTCAGTTTGGTACAGTACCTCTTATGACGAGCTCTGGGTGAGTTTAAACATTGA  
TCGGGGGAGCATTGGCGATTCTACTTTTTCCACCAATTTTCAGCAGATACACTGTGTTCAATTTGCTAGGGTTGGACT  
CATGGAGCGTAGATACCGTGGTGTCAATAATGTTTGGGATGCTTTTTGGGGACGTTGAAGGCGACAGTTCTAGCAA  
TGGGCTTTCTGATCCAATGTGTTGTATGGTTTCTGCTACAGGATGTGCTTCGACTCTATTTGGTCAATAGTAATC  
CCTCAGTGAAATTTTGGAAACCTGAGATTTGGGTTCAAATGTGCTTTATGGACGCCTTGCAGAAAGACGACGATTT  
GGTTTGGAGAGTTTTGGTTACTGTGTTGAAGAGATTGATTATTTGATGCAAAACGGATTTGAAACCTTGGAAATTT  
CCTTTGTTATACTAGAATTTGGGTCAAGGCGGAGTTTGTGTTGGGTTTGTACCCAAATTAGTGTTTTTTTTTTTTT  
TAAATAAATTGTTTCTTATTTTCATGTGATTTTTATGAAAATATATTATTTCTTATTCCACATTATTTTCATC  
TTTATATCTATGTCTATGTACCTATAAATAGTGTTTCTCTCTTTCAACTTTTGTTCAAACAAGAATTGTTGAATCTT  
AAATTCTCTCTATATTTGTCGATTAATAAAATTTCTGCTTCTGTGATTAACTCTCTTTGTTAATTTCTATACTT  
TTAAGTCATGTTTCTTATTGCAATTTTCAATTCTCATATCGTGTCAATTAATTTTCATTATTACAATCCTTCCGA  
GTCCAACATTACATTCTATATTAAGTACTTCATAATTTTTTTCTCTACTACTTAAATGCTCCATTGGATAGTAA  
AATATTAATAAATCCATAGTAATATCTAGGAGTGTCAACGAGTAGAGCTGAAATCTTGGCTCGGGCTCAGCTTGA  
ACTTTTTAAGACGGGCTTTTTTTTTTGTCTCAAGCCGAGCCAGACGAAAGCTCCGCCAAAAAATAAGGCTCAACC  
CGAGCTTTGACTCGGGCTAGCCGAGCCAAGCTCAGTTTTTTGGAATTTTTTTAATTTTTTTTCCCTAAAAGTGG  
CATTTGCTGCCTGTTTGGCAGCTAAATATAGGCTGCCTTTTCTAATCCCTTTTTTTACGAGCCGACCCGACTTGA  
GCCGACTCCCCAAAATGGGGCTCCGTCCGAGCCAAGCCGACTCGGGCTTTCCCCAGCCCAATTTTCAGGCAATCT  
GAGCCGGCAAGCCCGATTGTCTATCTTAGTAATACCCATTCAACCCACTTTAATATCAACAAAAATAAATACAATA  
AAAGATTATTTCACTTTCCCATTTACATTACAAAATTTCTAGAAAAATGAAATTAATAAATTAATAATGCATATATG  
ATTTTGTGCTGGGTTGCAAGTGTCCAGAAAGCATGGCAACAAGACTCTAAAGAGAGAGAGAGAGACAGAGACAGAGA  
GAGAGAGGGGCTTCTCTAGAAGACGAGTCTAATTTTAAAGGGGAAAAAAAAAAGTGGGACCATAAATTTTGGATGG  
AGCCCAATGTATTTTATTTTTTTTTTAAATTAATAAATAAACAATTTGTCAAAGGTTGCTTAAATTTGTACACGTGT  
CATCTGTGATAGGGTGGACATTCTGCATGGGTGGTACGACAACCTCACCCAAGATTTTCTCGATGTAATGAGAG  
AGATTAATTATTCAATTATGCTACAAATACACCTATTTTTTACATCATTTTTTGACAGCCCTCACACGATACAAGTG  
GGCCACGATTAAAATAATCGTGAGACTCACTCGTGTGAGTGGGCTGTCAAAGTGAGTGTACAGCAGATGCTGTA  
CACTCAGCTTAATTTCTTAATTATTACAGGACAAATTTGTACAACCTTTTACAGGATTATCTCCATTGCTGCAATAGT  
TAGGATAGAGGTGGGATAATCGATATATGTTTTTTTTGGGGGAAAAAATAATAGCACCTAGTTTATGAAATTGAA  
TATTGAAATGTAGGGGGTTTTGAGGTAATTTTCCCTGAATGAATTTATAATTATACTTGCCCTTGAAGTTCCAA  
GAGTACTTCATTAATTTCTACTAAAATTTTAATGAAAACTAGTATATTAATTGATAATCTGTACCTTTTCGGTTG

TAAAAATTAGGAAC TATACTACCACTTAATCATTATAAAACCTCACAGAAATCCAATAATATTTATCAAAAATAA  
AATAATTAAC TATAATCTGGTGTTAACTGTAGCTGGGAGCAGAGTTTGTGGCACATTTATCCTGATATTTGCTG  
CAACGGCCGGACCAATCGTAAACCAAAAGTACAATCAAGCCGAAACACTTATAGGCAACGCAGCATGTGCTGGTC  
TCGCAGCTATGATCGTGATTTTATCAACAGGTCACATCTCGGGTGCTCATCTTAATCCGTCACCTACTATTGCTT  
TTGCTGCAGTTCGCCACTTCCCATGGGCTCATGTACCAGGCTACATTGTAGCACAAATTTAGCCTCCATTTGTG  
CTTCCTTTGCGCTCAAAGGTGTTTTCCATCCTTTTATGTCCGGTGGTGTTACTGTCCCTTCTGTGTCAGCATAGGCC  
AGGCTTTTGGCCCTTGAATTTCTTATAACCTTCAATCTGCTATTTCGTCGTTACTGCTGTTGCCACTGATACCCGCG  
CTGTGAGAAATCAATTGAACATGAACATTCTTTTCTTCATATATTACAAGTAAC TAATCGCCATCTGAATTAATC  
CTTGTTGATAGGTTGGAGAATTAGCAGGCATAGCAGTTGGAGCCACTGTCATGCTTAATATTCTTGTGTCGGGGT  
GAGTAAATGATTCTTTTGCTACGTCGTCTTCTTCTTGAAGTAATAGTAAATGAAAAGGGTGATGGAAAAAGGAC  
GCTAGCTAATTGTTTTTACTCTCTTTGAATTGGCAGACCATCGAGTGGTGGCTCGATGAATCCTGTCCGAACCTCT  
TGGACCAGCAGTGGCAGCAGGAATTACAAGGCAGTCTGGATATACCTTTTGGCACCTACACTTGGAGCTCTTGC  
AGGGGCTGGCATTATATACTCTAGTTAAGCTTAACGGAGAAGAGGAAGAAGCCCCAAGCCAGGCGAGGAGTTTCCG  
TCGC**TAG**

>OeuNIP5;1\_Oeu020545.1

**ATG**CCGGAATTGCAAGTCGAAACTCTGACAATGTGCGGCCAGCGACGCCTGGAACGCCGGCGCCACTGATTTCT  
TCTCTGCGAATAGACTCAGTTTCTTACGATTGGAAGTCAATGCCACGATGCAAGTGCCCTGCCAGTTGATGCACCC  
ACTTGGGGTGACACACATACGTGCAGCCTCACCGATTTCTCTGTGCCTGACATCCCTCTTACTCGCAAGCTGGGA  
GCAGAGTTTGTGGCATTATATCCTGATATTTGCTGCAACGGCCGACCAATCGTAAACCAAAAGTACAATCAA  
GCCGAAACACTTATAGGCAACGCAGCATGTGCTGGTCTCGCAGCTATGATCGTGATTTTATCAACAGGTCACATC  
TCGGGTGCTCATCTTAATCCGTCACCTCACTATTGCTTTTGTGCTTCCCTTTGCGCTCAAAGGTGTTTTCCATCCTTTTATG  
TCCGGTGGTGTTACTGTCCCTTCTGTGTCAGCATAGGCCAGGCTTTTGGCCTTGAATTTCTTATAACCTTCAATCTG  
CTATTGCTCGTTACTGCTGTTGCCACTGATACCCGCGCTGTTGGAGAATTAGCAGGCATAGCAGTTGGAGCCACT  
GTCATGCTTAATATTCTTGTGGGGACCATCGAGTGGTGGCTCGATGAATCCTGTCCGAACCTTGGACCAGCA  
GTGGCAGCAGGAATTACAAGGCAGTCTGGATATACCTTTTGGCACCTACACTTGGAGCTCTTGCAGGGGCTGGC  
ATTTATACTCTAGTTAAGCTTAACGGAGAAGAGGAAGAAGCCCCAAGCCAGGCGAGGAGTTTCCGTCGC**TAG**

>OeuNIP5;1\_Oeu020545.1

MPEFEVETLTMSAPATPGTPAPLISSLRIDSVSYDWKSMPRCKCLPVDAPTWGAPHTCSLTDFSVPDIPLTRKLG  
AEFVGTFILIFAATAGPIVNQKYNQAETLIGNAACAGLAAMIVILSTGHI SG AHNPSLTIAFAAVRHFPWAHVP  
GYIVAQISASICASFALKGVFHFPFMSGGVTVPSVSIQAFALFLITFNLFFVVTAVATDTRAVGELAGIAVGAT  
VMLNILVAGPSSGSGSMNPVRTLGPAVAAGNYKAVWIYLLAPTLGALAGAGIYTLVKLNGEEEEAPSQARSFR \*

## OeuNIP5;2 Oeu046374.1

>OeuNIP5;2\_Oeu046374.1 | Scaffold476:396474..398858 forward

**ATG**CCGGAATTGCAAGCCGGAACACCGACATTGTGCGGCCAGCGACGCCAGGAACGCCGGCGCCACTGATGTCT  
TCTCTGCGCATAGATTGCTGTCTTATGATCGAAAATCAATGGCGCGATGCAAGTGCCCTCCAGTTGATGCATCC  
ACGTGGGGTACACCACATACCTGCAGCCTCACCGACTTCTCTGTGCCTGACATCTCTCTTACTCGCAAG**GTTAGA**  
**CCACTTTACGTTACAGTTAGATCTCTCTCTCCCTCCCTTGCCCTCGAGCATACTTAAGTGGTTCAAAGAATAAGAG**  
**TGAGGTATAGTTAGCCTTGATGTGAGGGTTCGATTCCCTGAAACATGAATTGAAACTTATACAGACAACCTTTTGT**  
**CCTTGACCTGTTGAGACATCCCACGATTAACCTTCTCTCGTGATGCTCCAAGAACCTTGGGTTCAACTTTTTT**  
**TCTCTCTCTCTCTCTTGAATATAATATGAACATATATGATTATTGACGTGGAAATTGGAATGGGGTCCCTTACC**  
**TTTCAGTTGCCTCTTTTAATTTTCTTTGTTGAATACAATATGAATAATGATCAGTCAGTCATTCTTTGTACGC**  
**ATCCTATAAAATTAATGTTAGGAGTATGATTATGACATGATTTAGGTTAGAGGTTAAATTACATTTTTTTT**  
**TAACGCTTCTATGATGTGACGTAACGATAAGTTAGCATGTATGCGGTGATTATTTGAAACATATGTTGTTATATT**  
**GTTATCGAATTTTATCAATTTAGAAGATGATAGTCCAAAATGTTGTGAAATTTGAAACAAAAGCCCTTGTTTCGAT**  
**AATCATACTTTTCAAACCTTTTTTTTTTCTACAGACTTATTTTCAACCACACTTCCACACAATAAAACATTTTGCAT**  
**GTAAACTCGAATTTTTTTTTTTTACTTTTTTAACAACACATTCTTTTAAAAATCACTATTCAAACCTCTATTTTTCT**  
**GAAAGTATGATTTTCAAACCTGGGCTAAATTGAGTCCAATGATCTAATTGAAACAAAATTGTAGTTCATCAATCC**  
**TATTGAAAAACAATTGAAATTCAATCACCTAATTGAGATTTTGTGAGACTTCTGAGTTCAGTGACTGAAAATGA**  
**AATTTAACGAAGTGAATTGTTGATGTGGAGTGGGTCCTTCGCTTAGTTGTGTCAAATGGGACCGGTCGCTCAAGG**  
**CCCCACCTCGTTATAAACTCGTATTGAAACCAAAATGAATGAGTCATGTGCTGTTTGATTGACTAGCCCAACAGT**  
**CCATGAATTTGCAATTAGTTTGCTCGAGTATACCTGCTGTGAAAAATGCCAAGAATCCTCCAATAATTTCTGTAA**  
**TGAGTATCGATAGAGAATCTGTACCTTTTTGTTGTATAAACTAGGATGTACACTGAAACTTATTCATCCCAATAA**  
**CAGAGGCCAAAACCACTCAGAAATTCGTTAAATTTGTCAAAAATGAAGGAATTAACATGTCAACATAAATTTGG**  
**TGTTAAATGTAGCTGGGAGCAGAGTTTGTGGGACATTTATCCTGATATTTGCTGCAACGGCCGGACCAATCGTA**  
**AACCAAAAGTACAATTCAAGCTGAAACACTTATAGGCAATGCAGCATGTGCTGGTCTTGCCGTATGATAGTGATT**  
**TTATCTACAGGTCACATCTCGGGAGCTCATCTTAACCCGCTCTCTCACTATTGCCTTTGCTGCACTTCGCCATTTT**  
**CCGTGGGCTCATGTACCGGCTACATAGCAGCGCAGGTTTCGGCCTCCATTTGTGCTTCTTTTGCCTCAAAAGGT**  
**GTTTTCCATCCTTTTATGTCCGGTGGTGTGACTGTCCCTTCTGTGACACCGGCCAGGCTTCGCTCTTGAATTT**  
**CTTATAACCTTCAATCTGCTATTTCGTGGTTACTGCTGTTGCCACTGATACCCGCGCTGTGAGTAATCAATTGAGC**

ACCAACATTCTTTTCTTTCTCTTTTCTTTCAGATATTACAAAGTAATCAAAATCCTTGTTGACAGGTGGGAGAAT  
TAGCAGGCATAGCAGTTGGAGCCACCGTTATGCTTAATATTCTTGTTGCGGGGTGAGTTAACGATCCCTTTTTGC  
TTCATCTTCTTCTGAAAACAATGGTAATTGAAAATCGTGAAGAAAAAAGGGCACCAGCTAACTGTTTAGACTCT  
CTTTGAATTGGCAGACCATCGAGTGGTGGCTCAATGAATCCTGTCCGAACCTTTGGGACCAGCAGTTGCAGCAGGA  
AATTACAAGGTGATATGGGTATACCTTCTGGCACCTACACTTGGAGCTCTTGAGGGGCCGGTATTTATACTCTG  
GTTAAGCTTAATGGACAAGAGGAAGAAGTCCCACGCCAAGTGAGGAGTTTCCGTCGC**TAG**

>OeuNIP5;2\_Oeu046374.1

**ATG**CCGGAATTCTGAAGCCGGAACACCGACATTGTGCGCGCCAGCGACGCCAGGAACGCCGGCGCCACTGATGTCT  
TCTCTGCGCATAGATTCTGCTGTCTTATGATCGAAAATCAATGGCGCGATGCAAGTGCCTTCCAGTTGATGCATCC  
ACGTGGGGTACACCACATACCTGCAGCCTCACCGACTTCTCTGTGCCTGACATCTCTTACTCGCAAGCTGGGA  
GCAGAGTTTGTGGGACATTTATCCTGATATTTGCTGCAACGGCCGGACCAATCGTAAACCAAAAGTACAATCAA  
GCTGAAACACTTATAGGCAATGCAGCATGTGCTGGTCTTGCCGTTATGATAGTGATTTTATCTACAGGTCACATC  
TCGGGAGCTCATCTTAACCCGTCTCTCACTATTGCCTTTGCTGCACTTCGCCATTTCCCGTGGGCTCATGTACCG  
GCCTACATAGCAGCGCAGGTTTCGGCCTCCATTTGTGCTTCTTTTGCACCTCAAAGGTGTTTCCATCCTTTCATG  
TCCGGTGGTGTGACTGTCCCTTCTGTCTAGCACCGGCCAGGCTTTTCGCTCTTGAATTTCTTATAACCTTCAATCTG  
CTATTTCGTGGTTACTGCTGTTGCCACTGATACCCGCGCTGTGGGAGAATTAGCAGGCATAGCAGTTGGAGCCACC  
GTTATGCTTAATATTCTTGTGGCGGACCATCGAGTGGTGGCTCAATGAATCCTGTCCGAACCTTTGGGACCAGCA  
GTTGCAGCAGGAAATTACAAGGTGATATGGGTATACCTTCTGGCACCTACACTTGGAGCTCTTGAGGGGCCGGT  
ATTTATACTCTGGTTAAGCTTAATGGACAAGAGGAAGAAGTCCCACGCCAAGTGAGGAGTTTCCGTCGC**TAG**

>OeuNIP5;2\_Oeu046374.1

MPEFEAGTPTLSAPATPGTPAPLMSSLRIDSLSYDRKSMARCKCLPVDASTWGPHTCSLTDFSVDPDISLTRKLG  
AEFVGTFILIFAATAGPIVNQKYNQAETLIGNAACAGLAVMIVILSTGHISGAHLNPSLTIAFAALRHFPWAHVP  
AYIAAQVSASICASFALKGVFHPFMSGGVTVPSVSTGQAFALFLITFNLLFVVTAVATDTRAVGELAGIAVGAT  
VMLNILVAGPSSGSMNPVRTLGPAVAAGNYKVIWVYLLAPTLGALAGAGIYTLVKLNGQEEVPRQVRSFRR\*

## OeuNIP6;1 Oeu060126.1

>OeuNIP6;1\_Oeu060126.1 | Scaffold830:250629..252602 forward

**ATG**GGCACTAAAGATGTTGCATCAGTTCCTACAATGTCTGTAACGCCCGGGATTCCGTGCTGCACTCCTCTTGTC  
GATGGCCAGTTCAAGCCGGAAGGTGTGGCGATAGCCGGAATCCCTTTTTAAGAGCTGCAAGTGCTTTAGTGTT  
GAAGCACTTTCTTTGGAAGAAGGGACCTTACCCTCTGTCTCTTGTGCATTGATTCCACATCCAATCTCCCTTGCA  
AGAAAGGTGACCTAGTTCTTCCCTCAACCTAGTCAATTTTGTAAACCTAAGTTCTTGGTTCAAGTCTTGCCGCC  
ATTAATGTATAATGCATTTATATCTTGAACAACGTCTAAACCAGGTGGGAGCTGAGTTTATAGGTACCTTCATAC  
TCATTTTACAGGCACAGCCACAGCGATTGTGAACCAAAAGACACAAGGCTCGGAGACCCTTCTCGGCTTGGCAG  
TCTCCACCGGCCTGGCAGTCATGATAGTTATACTCTCCACGGGTACATCTCCGGGGCACATGTCAATCCATCTG  
TCACCATTGCCTTTGCTGCTCTGAAGCATTTTCCATGGAAACATGTAAATGACTCTTAAACAACCTCTACAACC  
AGTAGTGAATAACAAAACAATTTTTCTTTCTTGGCTTAATATTGTCCAGTCTATCCCGTCAATGTTTATTGATT  
TTGGCAGGTTCCAGATATATTGGAGCACAAATATTGGCATCAACATGTGCTGCATTCTTACTGAAGGCTATTTT  
TCACCCTATAATGGGTGGTGGAGTAAGTGTTCCTTCAGGGGGATTTGCTCAAGCTTTTGTCTTTGGAGTTTCGTCAT  
TAGCTTCAACCTCATGTTTGTAGTTACTGCAGTGGCCACAGATACAAGAGCTGTAAGCATTTGCTTTACAGCTTT  
CAGCTAGTTCTACACATTGACTAGAAATCACAATTGACAAATTTTCGCGAACTTTATTTCTTTTATATTATCCAA  
TCTTACATACAAAAGCATGCCCTATTTTCGCACACCCTTTTATCCATTTGTTTGCAAGATAAGTGCTTCCACGAG  
AATAATAGAGACCTCTGGCATAACTAGCACAAAACCTTCAGGATAAGTCGAGTGACTAGCTGTATTTTAAACCAT  
TAATTTTTGTCCATTGCAGGAAGTAAGAACTAGATTTTAGCCCTGTTTGTACCCATTATTTGGAAAATAAAGG  
AGTTTTGAATAGTATTTTTTGAAGAATGTGTGTTAAAAAATAAAGAACTTTATTAGTTTGTGTGTAGAAATATTT  
TAATGTATGAATATGTAGTGGAGAATGATACTGTAGCAACAATATAAAATTTTAAAGGGTGCCAAACAGGCTCTT  
ATGGTAGAAGTTGGCAACTAGAAGTCCAGATTTCAACAAACATTTTATGAATATTGCAGGCAGTAGTAAACTGAC  
TAGTTGTGGGAATAATCAACAACAGTTGAATATATTGAACAATTTTTTGATAGTATATATGGAATCTTCAGCATG  
TTTAGCCAAGCTTAAATGTTTGTCTTATAAGTAATAAGTATATCTTAAATAAATAACTATTTTCTCTCTCTG  
AACAGGTAGGGAAGCTTGCAAGAAATTGGGGTTGGAGCTACTGTAATGCTCAACATACTGATAGCTGGGTGATGCT  
CTTAACCTCTCCTTTAATTTTCAGCACAAATTCCTCTATAAACTTGCTATATTTCGTTTGAACAAAACCTATGCTCTGA  
AAAGAGCTTGATAGAAACATAAACCTTGTCTATTTCATCCAGGGAAACAACCTGGAGCATCAATGAATCCCGTGAGA  
ACTCTGGGGCCAGCAATAGCTGCAACAACCTATAAAGCCATATGGATTTACCTCACTGCGCCTTTCTCGGTGCT  
CTGGCCGGGGCAGCTGCTTATTCTTTGGTTAAACTGCCAAACCGAGATGTCAATGGACACGAGAACTGCCTAAT  
GCAGAACATAGCTTCAGGAGAT**TGA**

>OeuNIP6;1\_Oeu060126.1

**ATG**GGCACTAAAGATGTTGCATCAGTTCCTACAATGTCTGTAACGCCCGGGATTCCGTGCTGCACTCCTCTTGTC  
GATGGCCAGTTCAAGCCGGAAGGTGTGGCGATAGCCGGAATCCCTTTTTAAGAGCTGCAAGTGCTTTAGTGTT  
GAAGCACTTTCTTTGGAAGAAGGGACCTTACCCTCTGTCTCTTGTGCATTGATTCCACATCCAATCTCCCTTGCA  
AGAAAGGTGGGAGCTGAGTTTATAGGTACCTTCATACTCATTTTTCACAGGCACAGCCACAGCGATTGTGAACCA  
AAGACACAAGGCTCGGAGACCCTTCTCGGCTTGGCAGTCTCCACCGGCCTGGCAGTCATGATAGTTATACTCTCC

ACGGGTCACATCTCCGGGGCACATGTCAATCCATCTGTCAACCATTGCCTTTGCTGCTCTGAAGCATTTTCCATGG  
AAACATGTTCCAGTATATATTGGAGCACAAATATTGGCATCAACATGTGCTGCATTCTTACTGAAGGCTATTTTT  
CACCTATAATGGGTGGTGGAGTAACTGTTCTTCAGGGGGATTTGCTCAAGCTTTTGCTTTGGAGTTCGTCATT  
AGCTTCAACCTCATGTTTGTAGTTACTGCAGTGGCCACAGATACAAGAGCTGTAGGGAAGCTTGCAGGAATTGGG  
GTTGGAGCTACTGTAATGCTCAACATACTGATAGCTGGGGAAACAACCTGGAGCATCAATGAATCCCGTGAGAACT  
CTGGGGCCAGCAATAGCTGCAAACAACATAAAGCCATATGGATTTACCTCACTGCGCCTTCTCTCGGTGCTCTG  
GCCGGGGCAGCTGCTTATTCTTTGGTTAAACTGCCAAACCGAGATGTCAATGGACACGAGAAACTGCCTAATGCA  
GAACATAGCTTCAGGAGATGA

>OeuNIP6;1\_Oeu060126.1

MGTKDVASVPTMSVTPGPICCTPLVDGQFKPERCGDSRKS LFKSKCFSVEALSLEEGTLPVSCALIPHPISLA  
RKVGAEFIGTFLIFTGTATAIVNQKTQGETLLGLAVSTGLAVMIVILSTGHISGAHVNPSTIAFAALKHFPW  
KHVPVYIGAQILASTCAAFLLKAI FHPIMGGGVTVPSGGFAQAFALFVVISFNLMFVVTAVATDTRAVGKLAGIG  
VGATVMLNILIAGETTGASMNVPRTLGP AIAANNYKAIWIYLTAPFLGALAGAAAYSLVKLPNRDVGHEKLPNA  
EHSFRR\*

## OeuNIP6-related Oeu011481.1

**Observation:** Incomplete at the 3' end

>OeuNIP6-related\_Oeu011481.1 | scaffold14354:165..1696 reverse

ATGGATGGTGAGGATATTGCATCAGCTCCTTCAACACCTGTAACACCAGGGACTCCAGGTGCTCCTCTCTTTTCGA  
GATTTCAAAGGGACAATAATTGCTTTAATGGTAGAAAATCATCTCTTCTTAAGAGCAGCAAATGCTTTAGTGCT  
GAAGCTTGGAATTGGAAGAAGGGAGTTTCCCCCTGTCTCTTGTGCATTGCCCCACATTCTGTCTCTCTTGCA  
AGAAAGGTGTGCATGAACAACCTCTACTAAATCATCTTGTCTAATTTTCGTTTTATTTTATTTTATTTATTTT  
TTTTCTTGAAGGCCTTTTAATAGGTGACAATGATATTTGTGTTAAGTTGTGGAACCTAATTATTGTTGAGCCATA  
ATTATTGCTGCTTCGCAGAGATGGTCGCGGATCAAATTAAGGGCTATTTACGAATTTATATTTTGTAAAATTAA  
ATGAAGGAATAGGAGTCTATATAAAATTTGATTTTAACTAATTTATCTTATAAATAGATAGCAGACCTTAGACT  
TTATTTATTATCATCAAATGGAGAGAGAGAGATTGGAGAAAATATGATTGATATTTTTTCTTGTAACCTTTTTT  
CATCATAGTGAATTATTGTAGTGACAGGACAGGACGTAGTCTCATACTGAGACAAACCTCTATAAATCTTGCGTG  
CTTTGTTTGTTTATTTCTTTCTATAAATTGATTGTTCTTGATGGGATAGAATTAGGGTTTATAATTCAGAACAAT  
TTGAAGTTGGGATTCTCGACTGATATATATGTTTCTTACCAGATGGGAGCTGAGTTTATAGGTACCCTCATACTT  
ATCTTCACTGGAACAGCCACTGCCATTGTGAACCAAAAGACAAACGGATCGGAAACCTTATTGGCCTGGCAGCC  
TCCACCGGGCTGGCGGTGATGGTAGTCATACTCTCCACTGGTCACATTTCTGGAGCTCATCTCAATCCTGCTATC  
ACCATTGCCTTTGCTGCTCTCAAGCATTTTCCATGGAAACATGTAAGCCCCCTCTTTGACAGCCATTATCCAAAAA  
TTATTTTTTTCTACGTACTCATTTTCAAACATTTTCTACTTTTAACCACACATTCTTCCAAAATTCACCATTC  
AAAACCTTGTTTTTTACCAAATAATAGCCATTAAATAGGGCCTAAATTTACATTATGCTGACTGATAGTATTAG  
AACTGTTAACAAAAAGCTAAACTCTTGTCTGTTTCATGTCAACTATGGTGCTCTATCACATTGGATTGATTCA  
ACTTTAATTTAATTTGGGTGCAGGTTCTTCTTACATTGGAGCCCAAGTAATGGCATCATTAAGCTGCTTCATTTC  
TGGTAAAAGGGATTTTCAATTCTATGATGGGTGGGGGAGTAACAGCTCCTTCAGGGGGATATGCTCAAGCTTTTG  
CTTTGGAATTTATTATCACTTTCAACCTCATGTTTGTCTTACAGCAGTAGCCACAGATACAAGAGCTGTAAGTC  
TCCCTCTCTCTAGTTACTTTTCGAGATATA

>OeuNIP6-related\_Oeu011481.1

ATGGATGGTGAGGATATTGCATCAGCTCCTTCAACACCTGTAACACCAGGGACTCCAGGTGCTCCTCTCTTTTCGA  
GATTTCAAAGGGACAATAATTGCTTTAATGGTAGAAAATCATCTCTTCTTAAGAGCAGCAAATGCTTTAGTGCT  
GAAGCTTGGAATTGGAAGAAGGGAGTTTCCCCCTGTCTCTTGTGCATTGCCCCACATTCTGTCTCTCTTGCA  
AGAAAGATGGGAGCTGAGTTTATAGGTACCCTCATACTTATCTTCACTGGAACAGCCACTGCCATTGTGAACCAA  
AAGACAAACGGATCGGAAACCTTATTGGCCTGGCAGCCTCCACCGGGCTGGCGGTGATGGTAGTCATACTCTCC  
ACTGGTCACATTTCTGGAGCTCATCTCAATCCTGCTATCACCATTGCCTTTGCTGCTCTCAAGCATTTTCCATGG  
AAACATGTTTCTTCTTACATTGGAGCCCAAGTAATGGCATCATTAAGCTGCTTCATTCTGGTAAAAGGGATTTTC  
AATTCTATGATGGGTGGGGGAGTAACAGCTCCTTCAGGGGGATATGCTCAAGCTTTTGCTTTGGAATTTATTATC  
ACTTTCAACCTCATGTTTGTCTTACAGCAGTAGCCACAGATACAAGAGCTGTAAGTCTCCCTCTCTCTAGTTAC  
TTTCGAGATATA

>OeuNIP6-related\_Oeu011481.1

MDGEDIASAPSTPVTPTPGAPLFRDFKRDNNCFNKRKSSLLKSSKCFSAEAWEEEGSFPPVSCALPPHSVSLA  
RKMGAEFIGTLILIFTGTATAIVNQKTNGSETLIGLAASGLAVMVVILSTGHISGAHLNPAITIAFAALKHFPW  
KHVPSYIGAQVMASLTASFLVKGIFNSMMGGGVTPAPSGGYAQAFALFIIITFNLMFVLTAVATDTRAVSLPLSSY  
FRDI\*

## OeuNIP7;1 Oeu037688.1

**Observation:** 1841n removed at the 5' end

Intron/exon redesigned by homology with Oleur061Scf4622g04016.1

>OeuNIP7;1\_Oeu037688.1 | chr4:6837162..6838876 forward **original version**

ATGGCTTTTCACGTACTTGTCTTTTATCCTGCATTCTGTTCCATTTTCATATGCCCTTCCGTAGCCAAAAATTCCT  
TTCAGACCAAAGGCACTTTTCTTACCGGTAACCAAAGATCCATCAACCCCTTCAATATGTTACTCAAATCGAGCAA  
AGGACACCTCTAGTGCCAATTAAACTGACTATTACCTTGGTGGACAGACCTTATGGGTGGATTGTGAAAAATGGA  
TACAACAGTTTCATCGTATAGGTCTGCTCGGTGTCGCTCAGCCCAATGCTCGATTGCCAAGTCCCATGCCTGTGGA  
GACTGCTTCAACCCGTATGCCTAAAAATCGGATGCAGCAATAATGCCTGCTATAACACCCCGGATAATCCTGCTATC  
AACACTTTCTATGATGGTGGGGAGATTTCTGAGGATGTTTTGTCATCAATCCCAATCCACCAACGGATTCAACCCCTGGC  
CAACCTGTTAACATTTTCAGATTTATTTTCTCGTGTGTTCCCTCATTTCTGACAGCAGGGCTTGCTAACGGGTTA  
AGGGTACAGCAGGGCTCGGGGAAGCCTGATCGCCCTTCTCTCAACTTGCTCGTGTGTTTTCAGCTTTCAAAGAA  
AATTTGCTATTTGCTTGAGCTCCTCCACTAGATCCAATGGCATCGTATTTTTTGGAAATGGCCCATATGTTTTGC  
TTCCTGGTATTGATGTGTCTATGTCTCTTATTTATACACCACTTATCAAGAATCCATTTGGCATTGGATCCGTCC  
CATTTCTGAACGAGCTCTCTTCGGAATACTTCATTGGATTAAATTTGATCAGAATCAACGGAAAATCAGTGCAAC  
TAAATAGAAGTTTGTATCAATTGACAGGGAAGGTAATGGTGGAAACCAAATCAGCACCTTTAGACCTTACACTG  
TAATGCAGACTTCGATTTACAATGCTTTGATTACTGCTTTTCAGAAAAGAACTAGCCAATGTCAGTAGAGTGCTTC  
CGGTAGCACCATTTGGGACATGCTTCGACTCTAAGAACATTGGTAGCACGCTCGTGGGGCCTGCTGTTCCACCCA  
TTGATCTTGTCTTTAAAGGCAACAATGTGTACTGGAGTATTTTTGGTGCAAACTCAATGGTGCAGGTTAATGAAG  
ATGTAATGTGTCTCGGATTTCGTGGATGGAGGGGAGAATCCCATGACATCAATAGTCATTGGTGGACATCAAATTG  
AGGACAATCTTCTGCAGTTTGATCTAGCTAGCTAGGCTCGGGTTTAGCTCTTCGCTCTTGTTCAGGCAAACAA  
CCTGTGCCAACTTCAACTTTACATCTCTCGCTTAAGGGTCTGTTTTTCATTTTTCTCATTCAAGATAACATCAAAC  
TATAAAATAAATTTCTGAACCTTTTCTGTTTTTGTCTGTTCTCATACAACTGCACGTTTTTTCTTCGTGTTCC  
TTTTTTTGCTTTTCATATCGCCTAAAAGTTGGCAAAGTAGTGATATTAGTAACTAAAAGTATGTTCTTGATTTT  
GCTTGGAATGATATTAACAACCTGCACCCCTCCAACTCCACCCCATCCCAAAACAAAAACATTGTAAGTGTTA  
TATAATTGAGAAACAGTTGGACAGTAAAGGTCAACCTATTTTCTTAAACATTAAAGAAGCATGAGTTACTTATA  
ATCCCTTTGAAAGAACAAGGATTGCGTTGAAACAAACAGTCCCCAAGCTTCTGCAACGTTATAAACTCCTCAAT  
CGAAATGTGTATTCTTAACATAGAAATAAAATGCAAAAGTGCGAAAGGATTCAACATTAACTACAATTCATTA  
GGCCTGTGGAACCTCAAATCCAATTCACGAGCAGCAAAAAATGCAGCAAAAGTATGAAAGCACCATTTCGGGAAC  
TGTCATCGACTCCTGACATTTTAGGTAGTACAGCCACAAGAAGCCAGCCCCAAAATGACCTAGAAAAATGGAGATT  
CAATGCTAAATGAACTGTCTTCAACTCTCTTCATAAAATCGACAAAAGTCTTGTGCGTAAGGTACATGTCTACA  
AAAGAATCTCCCATATTTGCTCGTAAATCCATCTTTTCATCGTCTAAATCTGCAGGTATTGGCAGAGGCATTAG  
GGACATTCTGTGCTAATGTTCTGCATTTGCGCGATCAGTACATAAATGCATTTAATCGGATTGGAAGCAGGCCTAA  
TGGAAATATCGTACAGCAGCACTAACAGTAAGTCTGTTATAGTTTTCTCCATAGGAGCAATTTCTGGAGCCCATG  
TCAATCCTGCTGTACAAATTGCCTTCGCAACTGTGCGCCCATTTCCCATGGTCCGAGGTAGTTCCAAGTCCAAAAC  
TTGTTAAATTTGAAGATACGGATCAAGAAATTGAATTTCAAATTTATTTCCCTTTTATTCTTTGAAGGTTCCACTC  
TATATATTGGCACAAATTGGGGGATCTACTTTGGCAACTTATATTGCAAGATTAGTATATGGCATTAGATCAGAG  
CTTGTGATGACCAAACCACTCCAAGGATGCACTGCAGCTTTCTGGGTGGAGCTTATTGCAACTTTCATAATTCTT  
TTCCTCACTGCATCCTTGTGCGATCGAGAAATTGAATTTCAAATTTATTTCCCTTTTCTTTGAAGGTTCCACTC  
TATATATTGGCACAAATTGGGGGATCTACTTTGGCAACTTATATTGCAAGATTAGTATATGGCATTAGATCAGAG  
CTTGTGATGACCAAACCACTCCAAGGATGCACTGCAGCTTTCTGGGTGGAGCTTATTGCAACTTTCATAATTCTT  
TTCCTCACTGCATCCTTGTCAAATGACCCTCAATCTGTAAGATTCTGTCAATTCTACTCGAGTCATTTTACGTTT  
GACTACACTTATCCTGTGATATGTTTCGGTTTAGAGTTATATCAGACATGTTGCACATATTAGGATATTCGATTTA  
CAGTGTTTCTAGTAATATTTCTTCTGGTATGATATAGTGCCATTTTTGCAGATAGGACAGGTGTCTGGCTTTGTT  
GTCGGGGTGGCCATTGGACTAGGAGTGCTAATTTCTGGGTAAAGCATAAAGATTCTACTCGAGTCATTTTACGTT  
CGACTACACTTATCCTGTGACCGCAGATATGTTTCGGTTTAGAGTTATATCAGACATGTTGCACATATTAGGATAT  
TCGATTTACGGTGTTTCTAGTAATATTTCTTCTGGTATGATATAGTGCAATTTTTGCAGATAGGACAGGTGTCTG  
GCTTTGTTGTGCGGGTGGCCATTGGACTAGGAGTGCTAATTTCTGGGTAAAGCATAAATAATTACTTTATTACAAA  
CTAACTAGAACTCACCAGATTCACTTAAGTCGATTAAATTATCAAATGCAGGCCTGTTTCAGGTGGGTCGATGAA  
TCCAGCGAGATCGTTAGGACCTGCACCTGTTTCATGGAAATTTGATGATCACTTATGGATATATTTAGTAGCACC  
AACTATAGGAGCCATTGCTGGTGTGTTTTGTGTACCGGATTTTACGACTACAAGGTTGGTCTTGTGAGTCGAGTCA  
AGCCCGAAAAGGAAGTGATTCTTTACAT**TAG**

>OeuNIP7;1\_Oeu037688.1 | chr4:6837162..6838876 forward **corrected version**

ATGCAGCAAAGTATGAAAGCACCATTTTCGGGAAGTGCATCGACTCCTGACATTTTAGGTAGTACAGCCACAAGA  
AGCCAGCCCAAAATGACCTAGAAAATGGAGATTCAATGCTAAATGAACTGTCTTCAACTCTCTTCATAAAATC  
GACAAAAGTCTTGTGCGTAAGGTACATGTCTACAAAAGAATCTCCCATATTTGCTCGTAAATCCATCTTTTCAT  
CGTCTAAATCTGCAGGTATTGGCAGAGGCATTAGGGACATTCTGTGCTAATGTTCTGCATTTGCGCGATCATAGCA  
ATAATGCATTAAATCGGATTGGAAGCAGGCCAATGGAATATGCGCCACAGCAGCACTAACAGTAAGTGTATA  
GTTTTCTCCATAGGAGCAATTTCTGGAGCCCATGTCAATCCTGTGTCACAAATTGCCCTTCGCAACTGTCGGCCCA  
TTCCCATGGTCCGAGGTAGTTCCAAGTCCAAAACCTGTTAAATTTGAAGATACGGATCAAGAAATTGAATTTCAA  
ATTTATTTCCCTTTATTCTTTGAAGGTTCCACTCTATATATTGGCACAAATTTGGGGGATCTACTTTGGCAACTTA

TATTGCAAGATTAGTATATGGCATTAGATCAGAGCTTGTGATGACCAAACCACTCCAAGGATGCACTGCAGCTTT  
CTGGGTGGAGCTTATTGCAACTTTTCATAATTCTTTTCTCTACTGCATCCTTGTCTGGATCGAGAAATTGAATTTCA  
AATTTATTTCCCTTTTTCTTTGAAGGTTCCACTCTATATATTGGCACAAATTGGGGGATCTACTTTGGCAACTTA  
TATTGCAAGATTAGTATATGGCATTAGATCAGAGCTTGTGATGACCAAACCACTCCAAGGATGCACTGCAGCTTT  
CTGGGTGGAGCTTATTGCAACTTTTCATAATTCTTTTCTCTACTGCATCCTTGTCAAATGACCCTCAATCTGTAAG  
ATTCTGTCAATTCTACTCGAGTCATTTTACGTTTCGACTACACTTATCCTGTGATATGTTTCGGTTTAGAGTTATAT  
CAGACATGTTGCACATATTAGGATATTTCGATTTACAGTGTTCCTAGTAATATTTCTTCTGGTATGATATAGTGCC  
ATTTTTGCAGATAGGACAGGTGTCTGGCTTTGTTGTCTGGGGTGGCCATTGGACTAGGAGTGCTAATTTCTGGGTA  
AAGCATAAAGATTCTACTCGAGTCATTTTACGTTTCGACTACACTTATCCTGTGACCGCAGATATGTTTCGGTTTAG  
AGTTATATCAGACATGTTGCACATATTAGGATATTTCGATTTACGGTGTTCCTAGTAATATTTCTTCTGGTATGAT  
ATAGTGCAATTTTTGCAGATAGGACAGGTGTCTGGCTTTGTTGTCTGGGGTGGCCATTGGACTAGGAGTGCTAATT  
TCTGGGTAAAGCATAAATAATTACTTTATTACAAACTAACTAGAACTCACCAGATTCACTTAAGTCGATTAAATTA  
TCAAATGCAGGCCTGTTTTAGGTGGGTTCGATGAATCCAGCGAGATCGTTAGGACCTGCACTTGTTCATGGAAAT  
TTGATGATCACTTATGGATATATTTAGTAGCACCAACTATAGGAGCCATTGCTGGTGTGTTTTGTGTACCGGATTT  
TACGACTACAAGGTTGGTCTTGTGAGTCGAGTCAAGCCCGAAAAGGAAGTGATTCTTTTACAT**TAG**

>OeuNIP7;1\_Oeu037688.1

**ATG**CAGCAAAGTATGAAAGCACCATTTTCGGGAAGTGTATCGACTCCTGACATTTTAGGTAGTACAGCCACAAGA  
AGCCAGCCCCAAAATGACCTAGAAAATGGAGATTCAATGCTAAATGAACTGTCTTCAACTCTCTTCATAAAATC  
GACAAAAGTCTTGTGCGTAAGGTATTGGCAGAGGCATTAGGGACATTTCGTGCTAATGTTCTGCATTTGCGCGATC  
ATAGCAATAATGCATTTAATCGGATTGGAAGCAGGCCTAATGGAATATGCAGCCACAGCAGCACTAACAGTAACT  
GTTATAGTTTTCTCCATAGGAGCAATTTCTGGAGCCCATGTCAATCCTGCTGTGACAAATTGCCTTCGCAACTGTC  
GGCCCATTTCCCATGGTCCGAGGTTCCACTCTATATATTGGCACAAATTGGGGGATCTACTTTGGCAACTTATATT  
GCAAGATTAGTATATGGCATTAGATCAGAGCTTGTGATGACCAAACCACTCCAAGGATGCACTGCAGCTTTCTGG  
GTGGAGCTTATTGCAACTTTTCATAATTCTTTTCTCTACTGCATCCTTGTCAAATGACCCTCAATCTATAGGACAG  
GTGTCTGGCTTTGTTGTCTGGGGTGGCCATTGGACTAGGAGTGCTAATTTCTGGGCCTGTTTCAGGTGGGTTCGATG  
AATCCAGCGAGATCGTTAGGACCTGCACTTGTTCATGGAAATTTGATGATCACTTATGGATATATTTAGTAGCA  
CCAATATAGGAGCCATTGCTGGTGTGTTTTGTGTACCGGATTTTACGACTACAAGGTTGGTCTTGTGAGTCGAGT  
CAAGCCCGAAAAGGAAGTGATTCTTTTACAT**TAG**

>OeuNIP7;1\_Oeu037688.1

MQQSMKAPFRELSSTPDILGSTATRSQPKNDLENGDSMLNETVFNSLHKIDKSLVRKVLAEALGTFVLMFCICAI  
IAIMHLIGLEAGLMEYAATAALTVTIVIVFSIGAIISGAHVNPVAVTIAFATVGPFPWSEVPLYILAQIGGSTLATYI  
ARLVYGIIRSELVMTKPLQGCTAAFWVELIATFIILFLTASLNDPQSIGQVSGFVVGVAIGLVLISGFPVSGGSM  
NPARSLGPLVSWKFDHLWIYLVAPTIGAIAGVFVYRILRLQGWSCESSQARKGSDSLH\*

## OeuNIP-related, considered as Pseudogenes

### OeuNIP4.2

>OeuNIP4;2-related\_OeuChr8 17852182..17858508 chromosome 8

**ATG**GAGGTTATTCTTATTATTGCTAAATTTATGCAATCTGCATAGTAAATATAGCCTTATTTTGGATACATTAA  
CAAAGAAATGAGTGTAATAACTTGATATGATGTTTTAAACTAGTATTTTATACAAAATTAGGATAGGAAAAATG  
GTGTTACATTAGAGTCGCCATGCTAATGTGGATTGCATAAAAAAATTGATGCATAAGCAAAAGTATATAATGTCTT  
CAAAAACCTCATCTCCAGTGCAACCTTAGTAGGGCTTCGTCTAGCTGTCGTGACAAGAAAAAATAGACATGGTGAA  
GATGTTTCATCAGTTATAAATGCTCCGTTAGATGGAGTAATTCAGCAAATTA AAACTCTCTCTCTCTCAGAT  
TTGTTATTTTTTCTCTTCCATTAAATATATTTGAGTAATAGAAAGAATTTATTCTAAATGAGATTGAACTTCA  
GCATCTATTTCATTAGACATAATGAAACGTGTCTGGGAAGCCTTTTTATTTGTCTACCATTTGGATTGCAATCCAT  
AGAATGTTTTTAGAGATGCTCTTAGTTGAGTCCACTGGTATAGGTGCTTCAGCAGATAATTGTGTCTATACTTTG  
TTATTTTAATAATATTCTTGAAATAATCTTGAGTTGTTTGTATAATCTTGGCACTAACAATCCCCATTCCAATAT  
TTCAAGATTAAGATTTACAAATATTAATAAAATTTAAAGATTAGGATACCATGGAATATGTGACCGTATTGTGA  
AGAATCGATTAGTGATGATGATATATAGCTGATCATTAAATGGAAGGGTTGAATTAAGGGCTGTGATTTCTTCTAA  
TCATAGTGTGACATATTAATTCAAATTTTGATATTACATAATTAACAACCATAAAAGGC AAATCTCTTGATTTA  
CTATCTAAAGAATATAAGTGTATCCAAATGGGCCAATTACGATGTCTAATAAAGGAGGAGAGTGAAAGTTTAATT  
ATATCCATCGACATGTCTCTAAATTAGCTTAACCATTAATCTTCTGATTATCTCAAACCATGCATATACTTTAGG  
ACATTTTAAAGCTCACCTAAACTCTTTTCTCTTTTAAATGCAGACAGAGAAGTAATCTTTAATTTTTGCTAATTAT  
TCATCAACAATATCAGAATGTCTGCAAGAGATATTGCAGAGATTGAAGAAGGTGTACCTGATCCATCGGATAATC  
GAACTGTAAATGATGGTACAACCTTTTTGCACCTCTGCTAATGTTGTTGTG**GTCACT**CAAAAGGTATTCAAATCCT  
CCCCCTCATGAAAGAAAGAAAGAAAAATTTAGGGTGTGATTGATGATCATGAAAATTTTCATTTCTAATAACTT  
CTACACTCTTTTCTCTTCACTTTTCGTGATATTTAGATTGTCGCAGAGGCCATTGGTACATATTTCTTGATATTCG  
TAGGCTGCGGTGCTGTTGCTGTTAATAAAAATTTAAGGTACAATAACATTTCAGGAGTATGTGTGGCATGGGTC  
TGATATTTATGGTCAATGGTTTACTCCGTTGGCCACATCTCTGGCGCGCATTTTAATCCAGCAGTCACCATTGCTT  
TTGCCATCTTTCGCCAATTTTCTTACAAACAGGCATGCCCTTAG**GT**TTTCTTCTTCTTCATTAAAAAACGTGAATG

ATTCAATTCACTCATCGGTGACAGCTTCTATGAGCATTTTTTTTTTTTTTTTAAAAACAATTATGGGGTGCTAAGG  
ACGGTGGACTGGACAGGATCAGATAGGACAACCGCGCATTTGTTTTTCTTAATCTTGTCCTGTCCAAGTACGAAA  
CACGTGAACAATTTATTTTTCTTTCTTTTGTAAATATGTGTGGATTTGTCATGATTTATTAGTAATGTTACTGCGAG  
GTACCACCTTTACATTTTGGCCCAGTTGTTAGGATCAATTCTTGCTAGTGGTACATTATAAATTCTGTTTCGATGTG  
AAAAGTGAAGATTTCTTTGGAACACACCAGTGGGATCCAATATTACAGTCCCTTGTCAGACAATTTATTACCTCC  
TTCTCTTGATGTTTGTCAATTTCTGGGGTTGCCACAGATAACAGATCGGTAAGCAAATTTCTGTAAACACCCTA  
ATGTATGCATTGCTTATTCTTTAGCGGATTATGAAGTTATTACACATTACACAACATGACTTGCACGTAGACG  
TGTAAGAAGGACGCGCCATGCAAAATATCTACTTTTTTGATGTTCTGTGCTCTTGGGTTGCTTGGGCCGGCACAG  
TAAAAATTCCATCACCCAAAATAATCAACGATCCCATTTGTTGGGTAAATGGTCAACAAAAGCACGTGCATGCAAAA  
TATGAATAGCATATGTGCATAAAAAAGTTAAGCAAAATAATGACTTACTGACGTATAGAAAATAAAGGAGATGAA  
ATGAAGTAAGATACAGAAATGCAAATTTCTTAAATAGATTTTGTCTTGCACTGGTGCTAATGGACATATTTT  
TCTCAAGATACAACATCTCTTCCAAAATTAATATAGTACAATATTAATTTTGTGTGGTGAACCACTGTTAGATGT  
TACTCTTCTAGAATGAAATATATAAACTAAATATCTAACACGAAACTCAAAAGAAATTTGGAAATTATTTTGGC  
ATAATTTAGAGAAGGAATGAACTAGAAATCAATTATATTGAATTGATCTGGAGTGAAGAAAATGGAATTAGAAAT  
CAACACATATTGAATTGGCTCAAGAGGTGCGCGACAGTTTGTAAAGAAAATTTGATGCTATCCTTGTGTATTGCA  
GTCTGGCTCAACTCACTTTATGCTTCTATCAATAAAAATATTTGCACATTACAATATGAACATGCATGAAACAATT  
TATACCCCTTCTGAAGATACTCTTTTTGAATTACCAATTATGTAACAAGTTTTAGCAATTTGTAATTATCCTCTT  
TTATATTAGAAATGACCCTAAAGGTTTTTACTTGTGCAGATTGGAGAATGGCTGGAATTGCCATAGGAATGACA  
ATACTCATAGATGTTCTTATTGTCAGGGTAATTACAATTTACCTTTCACTTTTATAAATCTTCATCTTTTCGTGCT  
TATAAATGATGTTGGTAGTGTCAAAAAATCCCTTAATCACTTGGTTATTTTTTGGCTAGGATTGGAAGTAGAAGTT  
AATTTCAAATATTTTTTTTTAACTGTTTTGAATAAGCCCCTTTTTCTTATTTTTTACGTAAAAATTTTTTTACTTTA  
GTCTGAAAATAATTCTTACTTTAGTGTCAAAATAATTAGTTTACTTGCTTTTAAAGTTTGACTCATAACTAATTAG  
CCTTTATATGTTAACATAAAAAATTAGAGATAATTAAATGACTAAAATTTTAGCTCACGGCTGGTTATTAATCTTC  
GTAGAAATATTAATTTGGTGTAGTGAATAATATTATTAATCCTCGAATAACGGATTCTTATGTTGGACCCGGAAG  
GATTGTAGTAAATGAGATTAATGACGCGATATGAAGTAATGAAGATCACACTGAGAAACAAGATTTAAAGTAAA  
GAAATTAGTAAAGAGAGTTAATCATAGAGGCACGACGTTTTATTAATCGACAATATGGAGAGAAATACAAGAACT  
CAGCAATTCCTTGCTTAAACAAAACCTGAAAGAGAAGACCACTATTTATAGACACATGGCATAGCATAAAATGGAAA  
TAATGTGAAATAAGAAAATAATATATTTCCATAAAAAATCATGTGAAATATAAAGAAAACAAATTTTCTGTATGAA  
AATAAGGAAACAATTTATTTCAAAAAAAAAAATCCATCCTAATTTGGGTTACAAACCCAACAATCTCTACCTTG  
ACTTAAATCTGGTGCAACAAACGAAACTCGAAAATTTCAAATCCGCCTGCATCAAAATAGTCAATCTCCTTAAT  
ACAGTAACATAAACTTTCCAAACCAATCTTCGTCATCTAAAAGGCGTCCATAAACGACATTTGAACCCAAATCC  
TACGTTCCCGAATTCCATCGAGGAATTATTGTTGACAAAATAAAACAGGATCGAAGCACACACTGTAGCAGAAA  
TCATACCACATGCTGGATCAGTAGGCCCATTTGCTAGAACCCTCACCTTCAACGTTCCCAAAAGCATCCCAGTTAT  
TATTAACACTATTGTACCTACGCCTCATGAGTTCAACCCAAGAAAATGAATACAGTGTATCCGTTGAAATTGGTG  
GCAAAGTGAATCGTCAATGCTCCCTGAGCAATATTCTGAATTGATCCAAAGATCGTCACAAGAGGTACTATAC  
CAAATGGAATATCCACCACGGTATTGAACCTTAGCCCCATGTCTCTTAAGTGATTCTGCATTTCCCTGCAAGATGT  
ACAACCTGAGATTTCTTCGTCCCTCCAATACAATCCTGATACTCATTGCGACATTCAAACTCCACCTTCACCGAA  
AAATTTTAACTCTTTTGCATCCAGAGTACTAAGTGAGATGGGATTCTTTTTCAGGTCTGGAATATGTTGAACCCG  
ATCAATTGTTTTAACTGTCTATCCCGTAGTCTAAATCTGACTCGATCGATCCCAACAATACGGTAAGACTGGTT  
GTTTCCCATTAACACTCCACCTTGTTGAATGGCCTCATATGTTTGAAAAAAAAAATCGATTTTGGAAACACATATGA  
TGCGAACATGCCGAATCGAGAATTCACCTCTCGTCAGGCCTAGATTTAACGTCAGATACCACGGTCAACATCACA  
TCTCCACTGTCTGAAAATCTTCAACTACATTTGTTTCATCTGAAGTCAAAGGTTGCGCTCCACGATTTGTAGGTA  
AATCATTATTAGCTTGCAACTTATCACAATCCTTCCGAATATGTTTATTACACCTGCAGTAGAAGCAAAACAAAT  
TGTTATATTATTCTCGATCTTTCCCTCCATCGACCACATCAGATAGATATAAGAGCTTTCTCATCCCTAAATGTAGCTC  
CAACAAAATGCTTCAATTTCTCCATTGAGTGCAAGCATCATAGAGCTTTCTATAGTCAAAGTATCCTGACTAT  
ACAAAATAGTGTCTCGAAACGAAGCATAAGAGCTAGCAGCGAATATAACAGGATCAAGGTAAGATCCTTTTCATC  
GTACTTAACTCTAACGTTTCCAAATCTATGACAATTTCTTGGACACGGCAATATGGTCTTCTAACGACCCCTTC  
TTCCACCATGGGGTGGGAATATAGTTTCTACTTTAGAGCTAGTTTACCGCTAAGACTCTTGGTCATGCATAATTG  
CTCCAATTTCAACCACAAAATAGCTGTAATTTCACTTTTAAAGACATCTTGTAGAGTATTTTGAATAGATGAAGA  
TGAATCAATGACAAAACCTTCTGATCCCTCCGTTGTCCAATTAGTTAACATCTTCTCAAACCCCTGTAACACATC  
ATCCAAATCCAACCTGCGCGAAAATAGCCTCATCTTTACTTGCTACAAAGAAAACCTTGTATTGTGATCTAGCAGC  
GAAATGTCATACTTTGTGGTAGTCATCTTAAAAAAACCTCAACCAATCCTCAAAAGAAAAATCAAGCTCTGGTA  
CCACTTGTTGGACCCGGAAGGATTGTAGTAAATGAGATTAATAACGCGATATGAAGTAATGAAGATCGCAACGAG  
AAACAAGATTTAAAAGTAAAGAAATTAACAAAGAGTTAATCATACGACATTTTATTAATCAACAATATGAAGAGA  
AATACAAAAATTCAGTAATTTCTTGCTTAAGCAAACTGAAAGAGAAGACTATTATTTATAGGTACATAGCATAGT  
ATAAAGATGAAAATAATATTTCCATAAGAACCAGTGAAGTATAAGAAAAACAAATTTTCCATCATGAAAATAA  
GGAAACAATTTATTTCAAAAAAATCTACTTAATTTGAGTGACAAACCAACATCTTATCTTATATGTATACAA  
GTGTGAAAAATAAACCTCAATAACATCCAAGTCTAACTGTTGAATGTGTACCTTCTCAAACTAATACTTTTTAG  
AGTATCCTCACAATAATGAAATAATATTTATATTACTTCTTTTTCTTTTTCTGTTGGAATTAATTTTCTCCTTT  
CATTTTTCTTTTTATGCTAACAACATAACAATGATTTACAGGCCAATTTCAGGAGGTTCCATGAATCCTGCAAGGA  
GTATCGGGCCAGCACTTATAATGCACCAATTCAAGTCACTTTGAGTGTACGTAGTCCGCTCAGCGGGCACCA  
TAGCAGGCGGTTTACATACAATTTGATTACAGAAAAACCACTTCGAGAAATTACAAAACGAGTACTTTCCTC  
AAAAGTATGTCAAGAAGCCACGCTTAA



>OeuNIP4;2-related\_OeuChr8

**ATG**GAGAATGTCTGCAAGAGATATTGCAGAGATTGAAGAAGGTGTACCTGATCCATCGGATAATCGAACTGTAAA  
TGATGGTACAACCTTTTTGCACCTCTGCTAATGTTGTTGTGATTGTGCGCAGAGGCCATTGGTACATATTTCTTGAT  
ATTTCGTAGGCTGCGGTGCTGTTGCTGTTAATAAAATTTAAGGTACAATAACATTTCCAGGAGTATGTGTGGCATG  
GGGTCTGATATTTATGGTCATGGTTTACTCCGTTGGCCACATCTCTGGCGCGCATTTTAATCCAGCAGTCACCAT  
TGCTTTTGCCATCTTTCGCCAATTTTCTTACAAACAGGCATGCCCTTACTTCTATGAGCATTTTTTTTTTTTTTT  
AAAAACAATTATGGGGTGCTAAGGACGGTGGACTGGACAGGATCAGATAGGACAACCGCGCATTTGTTTTCCTTA  
ATCTTGTCTGTCCAAGTACGAAACACGTACCACCTTACATTTTGGCCCAGTTGTTAGGATCAATTCTTGCTAGT  
GGTACATTATAACTTCTGTTTCGATGTGAAAATGGGATCCAATATTCAGTCCCTTGTGACAGAATTTATTACCTCC  
TTCCTCTTGATGTTTGTCAATTTCTGGGGTTGCCACAGATAACAGATCGATTGGAGAAGTGGCTGGAATTGCCATA  
GGAATGACAATACTCATAGATGTTCTTATTGCAGGGCCAATTTCCAGGAGGTCCATGAATCCTGCAAGGAGTATC  
GGGCCAGCACTTATAATGCACCAATTCAAGTCACTTTGAGTGTACGTAGTCGGTCCACTAGCGGGCACCATAGCA  
GGCGGTTTTCACATACAATTTGATTCACAGAAAAACCACTTCGAGAAATTACAAAAACGAGTACTTTCCTCAAAAG  
TATGTCAAGAAGCCACGCT**TAA**

>OeuNIP4;2-related\_OeuChr8

MGSNIQSLVTEFITSFLLMFVISGVATDNRSIGELAGIAIGMTILIDVLIAGPISGGSMNPARSIGPALIMHQFK  
SL

## Oeu005264.1 OeuNIP7-related

>Oeu005264.1 | Scaffold11917:939..1312 reverse

**Incomplete sequence**

>Oeu005264.1

**ATG**CTAAACAACACTTTTATCAACTGGCTTCAGAACATCGATAAAAGTCTTGTCCATAAGGTACTTGT**GTACAAA**  
**ACAAACTCCCATATTTGCTCGTAAACTCCCATCTTTTAAACGTCTAAATCTGCAG**GTATTGGCAGATGTTGGGGA  
CATTCATGCTAATGTTCTGCATTTGCGCTATCATAGCAATAGTGCAGTTAATAGTAGTGGAAGTAGGCCTAATGG  
AATATGCAGCCACAGCAACCTTGACAGTAACTGTCATAGTTTTCTCTATAGGAGCCATTTCTGGAGCCCATGTCA  
ATCCTGCAGTCACAATTGCTTTTGCAACTGTTGGTCCATTTCCATGGTCCAAGATATTTATAATTACTTGCT**TAA**

>Oeu005264.1

**ATG**CTAAACAACACTTTTATCAACTGGCTTCAGAACATCGATAAAAGTCTTGTCCATAAGGTACTTGTGTATTGG  
CAGATGTTGGGGACATTCATGCTAATGTTCTGCATTTGCGCTATCATAGCAATAGTGCAGTTAATAGTAGTGGA  
GTAGGCCAATGGAATATGCAGCCACAGCAACCTTGACAGTAACTGTCATAGTTTTCTCTATAGGAGCCATTTCT  
GGAGCCCATGTCACATCCTGCAGTCACAATTGCTTTTGCAACTGTTGGTCCATTTCCATGGTCCAAGATATTTATA  
ATTACTTGCT**TAA**

>Oeu005264.1

MLNNTFINWLQNIDKSLVHKVLVYWQMLGTFMLMFCICAIIAIVQLIVVEVGLMEYAATATLTVTVIVFSIGAIS  
GAHVNPVAVTIAFATVGPFPWSKIFIITC\*

## Oeu053221.1 OeuNIP-related

>Oeu053221.1 | Scaffold635:402535..403011 forward

**Incomplete sequence**

3' end stopped by an other gene

>Oeu053221.1

**ATG**GCAAATTCACCTTCTATTGTTAGCTTTTCTCTAAACAAAATTTACCAACAGACTTGTCCATTACAGAGGAA  
GCAAAGGGTTACTCCGCCGACGAATTCCTCCAAGAGATTCTGTTTCCCCGTCGTACTACCAGAAA**GTAAAGTTTT**  
**TAAACGATTGCATTTGACAATACAGTATACAAGATTTTAATGGATAATTTGTGCTTGAGTTAACAGATTATAGCA**  
GAGATTTTGGGCACTTATGTTCTTGTGTTTTGCGGGTTGCGGGGCTGCTCTAGTTGATCGAGAGAAGACATTAACA  
GTTGTGGGTTTAGCAATGGTGTGGGGGCTGGCTTTGATGGCAATGATATATGCACTTGCCATGTTTCTGGTGGG  
CATTTCAACCCTGCAGTTACCATTGGCTTTGCAGCAGCGCGAAAAATTCCTCCTCACGTAAGAATATCATTT  
GTACACGAAATTTGGATTGTTT**CAGTAG**

>Oeu053221.1

**ATG**GCAAATTCACCTTCTATTGTTAGCTTTTCTCTAAACAAAATTTACCAACAGACTTGTCCATTACAGAGGAA  
GCAAAGGGTTACTCCGCCGACGAATTCCTCCAAGAGATTCTGTTTCCCCGTCGTACTACCAGAAAATATAGCA  
GAGATTTTGGGCACTTATGTTCTTGTGTTTTGCGGGTTGCGGGGCTGCTCTAGTTGATCGAGAGAAGACATTAACA  
GTTGTGGGTTTAGCAATGGTGTGGGGGCTGGCTTTGATGGCAATGATATATGCACTTGCCATGTTTCTGGTGGG  
CATTTCAACCCTGCAGTTACCATTGGCTTTGCAGCAGCGCGAAAAATTCCTCCTCACGTAAGAATATCATTT  
GTACACGAAATTTGGATTGTTT**CAGTAG**

>Oeu053221.1

MANSPSIVSFSSKQNLPTDLSITEEAKGYSADEFPPRDSVSPSYQKIIAEILGTYVLVFAGCGAALVDREKTLT  
VVGLAMVWGLALMAMIYALGHVSGGHFNPAVTIGFAAARKIPLVHVRISFVHEIWIVQ\*

## Oeu017634.1

>Oeu017634.1 | Scaffold1737:102936..103291 forward  
Incomplete sequence

>Oeu017634.1

ATGGCGGATTTTCGAACCGGGGACACCAGGGACGCCGACAACGCCGACGCCGCTTATGTCGTCTCTGAGAGTGGAT  
TCACTGTCGTACGATCGGAAGTCAATGCCGAGATGCAAGTGCTTGCCTTTGGATTTCGTCTACTTGGGCGGCACCT  
CAAACCTGCTTCACCCATTTCTCTGCACCTGAAATTTCTCTCACTCGCAAGGTTTCGCAATCTCTCTCTCTCTCT  
AACACACGCGCGCGCACTGAGTTACTGAGATCCTTACACGCACGCACTATTTTCCTGGAGATCCTTGCACGCACG  
AATTCCTGGAAAATATACTCGTTATTATGTATGGAAAACAGGAAAAGAAAAGATGA

>Oeu017634.1

ATGGCGGATTTTCGAACCGGGGACACCAGGGACGCCGACAACGCCGACGCCGCTTATGTCGTCTCTGAGAGTGGAT  
TCACTGTCGTACGATCGGAAGTCAATGCCGAGATGCAAGTGCTTGCCTTTGGATTTCGTCTACTTGGGCGGCACCT  
CAAACCTGCTTCACCCATTTCTCTGCACCTGAAATTTCTCTCACTCGCAAGGAAAAGAAAAGATGA

>Oeu017634.1

MADFEPGTPGTPTTPTPLMSSLRVDSLSDYDRKSMRCKCLPLDSSTWAAPQTCFTHFSAPEISLTRKEKKR\*

## SIP – Small Basic Intrinsic Protein

**OeuSIP1;1 Oeu050292;1**

**>OeuSIP1;1\_Oeu050292.1 | chr4:9340524..9350151 reverse**

**ATG**GGTGCTATAAAGGCAGCGGTAGCCGATGGGGTGTTGACTTTTATGTGGGTTTTTTGCGCATCGACTTTGGGC  
GCACTCACTTTTGTGGTGGCTTCTGCTCTCGGAGTATCCCAAGGACTACCCACTCTTCTCGTCACTACTGTCCTT  
GTTTTTGTACTGCTGTTTCGTGTTTCGGCATCATCGGCATTTCTTGGGCGGCCACCTTCAATCCCACTGCAATC  
GCTGCTTTCTATGCCGCTGGTATTGGAGGCGCCGATTCTCTCTTCTCTGCTGCCCTCCGCTTTCTTGGCCAG**GTA**  
**TGAATCATGTGATTAGTCAGATATTGATCATGTTTCTTGAGAGTATGTAATCCTACTTGCTTGATTCAAAATGTAG**  
**ATTAGTATGTGAATATTGTCAGTCGATGATATGTTTGTGAAAATCTAGATTGCTTAGGGCTAGATCTATATAATG**  
**GAATTTAAGATTTTAAAAAAGGAGGTCTCCCTTGACAGATGATATAGTTGAGAAAACTAACAGATTGAACTG**  
**AACGACCAAAATTTAAATAAAGGCACACATGAATAATGAGTTTGCAAATAATAAACTTTGGTGACTTACACGAAA**  
**ATTTTACCACAATTTAAGTGTATACATGCAGGGAATGAAAAGTCTAAAGTTATTACTTTTATCCTTGACAG**GCG****  
**GCTGGTGCAGTAGGTGGTGCTCTTGCAATTATGGAGGTTATGCCAATGCAGTACAAACACATGCTTGGGGGTCCCT**  
**TCATTGAAGGTTGACCTGCACACTGGAGCTATTGCTGAGGGCGTTTTGACTTTTACAAATTACCTTTGCTGTCCCTT**  
**CTCATAGTCCCTAGGGGTCCAAGCAACCCACTAGTGAAGAATTGGTTGCTTGCCATGGCAACTGTTTCGGCAGTC**  
**GTTGCCGGTTCAAGTTATACTGGACCTTCGATGAATCCTGCCAAT**GTAAGTGACATATCTCTTTCCATTCTATC****  
**GCTAGATTCTGAAATTATATGATGATCTATGTCTTATTGTGGAATACCCTAATCCTTAAAAATTGCTGAGTAATC**  
**AAAAAATTAAAGAAACAAATAACATGAGGTGAGAGTTTCTCTTTCCATAGCACATAAGGACAACGTATCTGCT**  
**GAACCTTTCTCTAATTTTTTTTTTTCACATCCCAAGCCAACCTGGAATAGAGTAGTTACTTTTCTCAATATGGTA**  
**CCCGACCGTGTCTTTTAAAAATAAAAAAATGTTTATATGTAATGTGATTGAGCTTAGACATCTGAAGCACAAATTT**  
**AGAGTACTGCTCGCATTTGGCTCCCATATTTCCATTTAAGAGGTCCACGAGTCGCATCATTATTGTCTGTGTG**  
**GGATGTCAAATTATCCTCAACTACCAAGTTTCTCTTTCCGTCTATGTGCCACCTTGTGATTGATCGATTAAAGTGC**  
**TGTTACCCTAATTAGGACCCACAGCAAAACAGTAGCCCTTTCTTTTACATTGACCTTAAAGTGGGTTTGGAAGTTC**  
**CATCTATCGTAAACTCAGATCACTTTCCACATGATTGGATTTTTCTCCAACCTTGAATAACCAATCATTTTCG**  
**TATTGAGTCCTGAAAACTCCAGCTTGATCATTAACCTTTCAGATTCAAAGAATATAGTTTTAGCTTTTGCTCATTT**  
**TGACCATTATGGTCTGGTAGTGGCATTGATTTCCAGACTCAGCCATTACTTGGGAGCATTTGTTGAAAATAACATC**  
**TGCTGTAGGAATAAGGACAATGTCTTGGGAAAGTCAATTTTGGAGAGATGAAAAGCTTGCTGGTACATCAGTTAT**  
**ATAACCGGTTGTAGAAAGTTGCATTGGAATTGAATAGCGCATGCTGAGCACGCAATAGAATGCATGCTCAATTA**  
**ATTAGTAGAGAAATGATAAAATTACATATGAAGAAGAATGATGAAGACTTTAAAATTTTTCAGCTCAAGCTTCTAA**  
**TACTTAGGTTTCTTCCAACCGAAGCTACTATTTTATTCATTTTGGTGCCTGGGACTTGGGCACCTATATCCAAC**  
**TCAAGTTCAATGTGTATCTTTTTCAAGTTTTCACGCTATTAAACTAATGAAGTTTTCTGGGGAAAGTGTGTAAAAT**  
**CTGTCTGGAAGTAACTACTGCAGAGTTTTCTTGAAAAAGTAATCTGTCTTTCTCAACTATTTTTGTGGCCATAA**  
**ATTAGGTTTCATTAATGGATTAATTATGTCATGACCATTTTCGCTAATAATCTACTACACAATTGCTGAACAATTGA**  
**AATATGCCCCGACGCAATGAAGGAATTGTGAGAATAAAAAGTTTGAGACTTGAGATGAACCAAAAAGGAAGTTCT**  
**CACCTTACCACAGTGCTAGCCTGAATAAGGATGGAGATTAGAGAATAATCACAAGCAAATTAAAGGGCTTAGGAT**  
**TAAATTAATCCAAGCTATCCAATACTTAGTCATATTAGTCAGACAAAATGCTGATTTTTTATACATGCATTTGG**  
**AATAAAATATGAATTTTTAGTTTTTCATTTTTTTTTGAGTTCCTATTTTTTTTTCCACATGTCAAACCTTTATTAT**  
**ATTGAAAAACATAAATAGGTATCTAAACTAATAAGTAATAATTTATAATGAGTTAGTATTTAATCCAATTAGGA**  
**AACCTTCTATTTTTTTGTATGTGCTTAGTTAAAAATAAAATATCCAAATATAAATACCCTCTAAAACTCAATTAA**  
**ATCATCACTTGGCAATTCTGAGTAATTAACCACCAATGGTTTGGCCAATGACCTTAGGACGAACAAAAGTATCTA**  
**AGCTCTAATGAGATCCCTGAATACTGGGCAAATTATGTTGAAGTAACATTATTGTATCTTGTCCATAACCTACC**  
**AATAACTTTGAATGCCCTTATGGAATGAATATCCTCGACCCATAGAAATGGAAAATTATCAACCTTTTAGGTTAC**  
**ATTTTGACATTCCAATCTTCTTGATTCACTAATTCGAACCATGTGTGTAACGCTTCGAGATCTTTTTCATCTTC**  
**ATTATTTTATTCTTTTATAAAAAATAGGCTCAAGGTGTTACTAACATCTTCTTTGTCTAATTTAAAAAGAAATATC**  
**AGTTTCATTAAGTGTGAAAATGCATAAAAAATAACTATTAAATAATGTGCACAAAATTCAATATGAAGATGTTCT**  
**TTAAATAAAAGTTTGACAATTATCTTTTTTTCAGAAAATTTACTTGGCGATCCCATAGCTACACTCGGTCAATCTT**  
**ATATGCCTCCAAACGACCCGTTCTCATCTGAAAGGTATTGTAAAAGTGTATTTTGAAAACATTCAAGTAAGAATAC**  
**GAGCACATTTTTTATTAACAGCATATAAATAAATAAACTGACATAATATATCGACATTTCTTAGATTAGAGTTCAA**  
**GGAATTTTATTAAGAATTTCCCATATCCCTAAGATTTAACATTTTTTGACTAAACAGTCCATCCCGTAGGATTTAAC**  
**ATTTTTGACCTAACGGTCCATCTAGAAGGATTTAACATAGAGTTCGACTGAAGGCCTCATAGCATTTTATGCCAA**  
**AAATTATACAAACATCAAGGAATAAGAATTTACCATTTTGACGATGTATTCTTACCTCAATGATACCAAAAACAA**  
**AATATGAAAATATGGTTTGTAGAATAGAAAAATAAATTATTTCTAATAGATTGTGTGTATGTGAATTTATAGGGA**  
**GTGCACCTTTTTTTTCTGGGAATTATAATCTAGTTAGATCACCTATATATATATATATATATATATATATATA**  
**TATATATATATATATATATATATATATATATATATATATATATATATATATATATATATATATATATATATA**  
**CAACGTACCAATATGAATTAATGAAAGTTTTGATTTATTATTTTATTACTATTTATATTTTGCTTATAAACAAA**  
**ATATAAAATCTAGAATGCTTTCTTTATAACAAAATATCTCGGGTATAAAGTTTAAAAATTACTTTTTCTTGAT**  
**TCCAAATTATATTATTTAATACAAGCGATAAAACGAGTATAATATTTATATTTTATCAACTTCTAAAAATACGTAA**  
**ATAAATATTTCGACCCAAATAAGATTTACGATAAATTCTAAGTACACATGAGCAAAAATAAATCATCAATTTTTGGA**  
**CTTTTAGTGTAACGACAAATCTAAACATGAATTGTTTCATTTGCTAAGTGACCCATAAAAAGTTCGTGGTGTTAC**  
**AATGTGACCACCAATATTGATGCAAGATAAAATAAGGAGAAGGGGAAAGGGAAAGGGAAAGGGAAAGGG**

AGAGAAGAGGAGAAAGGAGGCGGAAAGATAAGAAGGGGGGAGAAAATAGAGAGAAATAGGAGAGAACATCAAGTC  
ATTTTCATAATCAAAGATTATTTTCCAATTACATTGCATAGACCCTTTATATAGGGTTTGAACCTAATTATATTTGAA  
GTAAGAAAATACTCAAAATAAATAACTAATTATGTTTCTTAAAAATAAACTTTAGAAATGAAAACTAAATATACTAA  
AATCCATCCTAATTCTCCATCATTTCTCCTAAGCTGAGATAACTCGACTCCAGCAAAAATAAATTGCAACTTCTTA  
CCCAAGGAGGGCAATGTTTCTTCTTCACCAATAATGGACCCATTACATATCAATAATTGAACCTGAAAAACAT  
TCACAAACTTCCAATTTGACCAAGGGCTCATAACCAATAGCAATAAGGAACTTTAGGAAGCCACAACCTGTGTC  
AACTCATTTACAAAACTGTTACAAGATCCACTTGAAGGGCACAAGGTACTAGCACAAATCGACTAGCTTGAGAA  
ATGAATAAATGCAACAATGGTGGCTCGAATGTACCCTGACAAGGCAACAATTCTGTTATATTGAAAAATAAAACCC  
TCATTTAAGTGTGATGGCCAATCTAATAGATTAAATTCAAGTGAGAAAATTTAATCGTTTCTCTACATGTGTAAAGA  
AAAGTGTGTTGAACGAACAATGACATTAGATAATGTGGTAACCCGAGAAGCATCACAAAGTAAAGGTAAAAACAATA  
TCAAAGTCAACGATAGAGTCATACAACAGATTAGGCAAGATCAATTTTGGCACGTAGTCGTGGATAGGTGGATTG  
TTTGACTCAGGTGACAATAATATAGATAATTTCCCATCCTCGATATTAGAATATTCAATTGACTCAACGATAGAA  
ACCTCAATTTCTTCTTCAAGAGCAATACAACCTAGACTCAAGAGATGATTGTTGGAAATGGGTGGTAGACCTAGCT  
TATGACACGCTTCGCGAAGATGGAAGGATAAGTTCATAGGTTGTCTGTTGGTAAGCTTTGTCTAAGGATTGGA  
ATGTAGGAATATCATTAGGCAAAGTTTCAGGATTCAAACCATTGATAAACCTAGATGTTGTGATGTAGAGAGCCT  
TATAAATATAATAATTGTTCAATAACTCTTCGAAGTGGGCAAAAATATGCACTAGCAGTGGACGTACCTTGCCATA  
AGTGCAAAAAGTATTGATTTAACAATTGAGTTCGATAATTTACATATGCATATTTATTACTTAGGACTTGTTCAT  
TCTCATCCCACAAGGTGACACTGCGTTGGCCTAGACGATTATGCAAATATGATCTCCAATAAAATTTTAGTAGAAT  
CGACCGATGATATATACATAGCATGACAAATTTTACATGCATCAAAATTTGTGATAGAAAAAGAATTTTTCAG  
ATTATCAAGCCAATCAAGAAGTGAATCAGATCCAGTGAGACATTAAGTCTTATAGGTGGATTGCAACTTGTCTGA  
GGAGAAGAATGTACCTTTTTTGGACAAAGGTATTAGACGGGGAAAAATTGCGCGGATAAGTGCAAAAGTGAAGGTATA  
TGGTTGTGGTAGTGACCTAAGGATGTGTTGTGGGCGTAACTGTTGTACATGAAGTGTATGTAGTGTACGATGAC  
ATTTTTTTTTTTTTTTTTTTTTTTTTTTTTTTTTTTTTTATTATTATAAAAAATGAGGTTTGATGGGCTACGAACACCGAAATG  
AAAAGCAAAGCGTTCAAATAACAAGATGATATACCTTACAAAAGTCCAATCAAGCCGCTGGTTGAGCACCAATTT  
TAAGTTCCAATCTGACAGATTATACACTTTATTGTAAAATTAAGTCTAGCTCAGGAGAGACACAAGTTGTGGCG  
GTGCAATTTAGTTCTGCTGCCCAATAATCTGAAAAATAAACTATAAGCCAGTATGTGGAATTAACCGCAAGTTGC  
TATAAACACTCTTGTGTTGGTTCGTCTATGTAAAAGGATGAAGCTTCTGTCAGCTCAAATGTGCTCTGAAAATTGAAAG  
AAAACCTTAGTAAAACATGTGAGCTTTTGATATAGATTGAGTGATTTTGCAGTGACCAAGCGAATTGTTGAGATGG  
AAACTATAGTGTAGATTAGGAATAATTTGGATGGGAGAAAAATCCAAAAGTGGGGATCATTGTTAATTGAA  
ATATTAGGGAGGATTGTGAGAGTGTGAAGGAAAAGTGTGAAGAATAGAGAGATACAGATTTGTGCAGTGACAGC  
GATGCGTGTGTTGGTATGGAAGTGGGCGGCGACCGAGGAATCAGGCAGTCATGGCTACAGATGTTCTGGTATTG  
TGTGTATAGGATGGACTTTTATGTGATGGGTACTATACGTGATTTTGAATTTGATGTGGGCTGGGTATGTGTT  
GTGTTGCTTGTGTTTTGGATAGGTGGATGATAATATTTGGTTAGTGGGTTGGGTTAGGGTAATTTGGTTATGGGTT  
TCATTGGGCCATTGGATGTTGGCGAATGTGTGTATATGTATATGGGTTAGTGGGTTGGTGTAAACAAATTAGGGTT  
TGGGGAAATTATCTAGTGGGCCAGGTTGGTATGGGCTTGGTCTTGCTTGATGTATAGGCTATTGGGTTCTGATAG  
GTGGGTAATATAGGGTTTCTTCGGTTGAAAGCAACCAAAATTGGCCTGATCAAAAATAAAATTGTACTATTTTTTTC  
AGAACTGATGAAAATACTAAAATTAATAATTTTACGGTGTAACAGTATCCACTAATAGTACAATGAGCAATAA  
CTTCTTCTTTCTTTCTTTTTTTTTTTTTTTTTTTTTTTTTTTTTTTTTTTTTTGGTTGATGCTGCTGCCACCTTTTGTG  
GTTTAAAGTAGGTTTTGGCCGGATATGTTGGCGGCTATGGTTTGATTGTTGAATGATGAAACGGGTGGTTTTAAAT  
GTGGAAGTGAAATTTGTGGTCAAGGGAAAGAAATTGAGCTCTACTACCAAATTTGATGTAGGATACAATAAGGAG  
AAGGGGAAAGGGGAGAGAAAAAAGAAATGAGGGGGGAAAGAGAAAGGGGGAGAGAAATAGAGAGAAATAGGGAG  
AGTATCAATTTATTTTATAATCAAAGGTTATTTCCAATTACATTGCATAGACCCTTTATGTAGGGTTTGAATTAA  
TTATAATTTGAAGTAAGAAAATACTCTAAATAAACTACTAATTGAATCCATCCTAATTTCTCCATCAGATATGTATC  
CATATTTGAAATCCAATATCTAATATCTGTTTAACTAAAAATAACAATCATATATTGAAGATTATACGCATGAT  
GTCTGTTGTGAGCCTATGTTTGACTCATGTTTATAAACACTGAAATAATTTTTTCTCCTACATTTTACGGGACCT  
ACCAACTACTTATTTATCCACCCTCATTTGTATCTATTTATGGTTTAAACCATTTATAAAACAATTTTCATTCA  
CGCTTTAAGAGATATCTGGTGCCTATTGACAATATTTAATTCCATAACCATAAAAGATGTTTCACTCAACTTATTG  
AGGGTATTGGCCGTAAGTAAGATCTCTTCTGTTGATATTTCAAAGTAATAAATCTTATGATTTGAATCTATTTTT  
CTTTTTAAGATTAAAGACATACATGCTTTAGTAGTTTGAAGAAAACCAATCTAACTGATGCAATTGTATATGAAT  
TTTCTGTCTGGGTCTTGTTCAACGCATCGAACCCATGTACACACTGCATGTCAAACCCAAAATCTCATTTTGGC  
AACCAAGATAAATCGCCCCATCCCGTAGAGTTGACGTGCTACAATTTATGATGAGTTGTCTAACTCAACCTAA  
CTGTGATCTGGTAATAAAGTTACATGGAACCTTGATTCTATCTTCTTAGCCAGTGATACATATCCCAAGTCATGT  
ACAGTTTAAATTCATGGCATTGTAAATTTTATCTAACAATTTGCCTGCTGTAAATGTATATTGGTAATGAATTC  
AAAATCTACTAAAGGTAAAGAACGATTGCAGTACTTAACTAGTTGTATACACAAGAAGTTAACTGATAATGCAT  
GTAGGATCTACTGTTTGTGATTGGTAAGAGATTCTTGGAGTTTCCCACGTAGGTCAAGAGGAGGTAGTTGTGT  
ATGCCATCTAATCTGTGTCGAGAGCTGCTCAGTTTCACTGCTATCTTAACTTTTAAAGGAAGGAAGAAAAACCA  
CTTCACAGATTCATGACACAGATGTTCTTCTCTTTGGAAAACCTGTCTGCGATAGAACCTTCCACGTGCTGGTG  
CCTCTGCTGTTTTTACCTTTTCTCCTCCTCTTTTTTCCCTGTATTCTAAAGTAGGTCCCTTTCAAAAAGTATTTGA  
TGCTTTTGTGTTGATCTTTTTTCTTTGGAATATTTGGTCCCCTTTCTTCATCTGTTACTATGGTATGCCTTTAA  
GAAGATGGAATCCAATAACATTTCCATCAATTTGTGCCGTTCTTTTAAACGAATCCCAATTCCTTTGGGAGAAAT  
TAAATTAATTTGTATAACTGCTGAATTAATTGGATTGTTGCAAGTGGAATGAATGGGATGCGGTCTGTTACATA  
GCAAATTAATAATTTTGAATTTTATTCAATTTGAGCTTACTAATTAGCTGATCTAACTTCTATTTAGCTACATA  
TTTGAATCACTAGGCTCAAATCTTGAACCTCAAATAAGTGCCGAGAACCTTTTGAAGTATAACTAGCAGTTTAAAAA

TTGAATAAATTTATCAAAACTGTTCTTTAGATATTGGCAGTTTTGCGGAGCAAAGAATTGTTTAATATAATAAAAA  
ATTGAGGTACCGTTTCAGGACATTATAAGAGTTCTGATCTGTAAGTCTGTCAAATTTTTCTTTATGTGTTTTCT  
TGAATATGGAAAGTCAAAGTTGTTCTTTGAAGTCTTATATTTGCATTTAGTTTCTTGATTCTCTTTCTCCTAAT  
CTGACTTCTCTATCCTCAAAATTTTCAGAAGATAATTTTGCTTAGTGATAGTTTCGATTCTGTGTGTAATTCCA  
TAGCTACTACGGCAAGGATTGCTGTGGTTTTAGTTTAGTTTCTTGCAAGTGTGCTAACATCCAAACATCTTGTGTA  
ATTCCATCATTCTTAACCTGTTCTTATTATTTTTATTAGCTATTTTCCGCAAAGCTTGTGTTAAAAATTGGATGCT  
AATCGTGTCTAATATATTGCAGGCATTTCGGGTGGGCATATGTATATAATAAGCACAAACACATGGGAGCAATTCTA  
TGTTTACTGGATCTGTCCATTCACTGGAGCAATATTGGCTGCGTGGACCTTCCGCTTTCTATTCCCCCCCCAAC  
AAAGCAGGACAAGGCGAAGAAAGCC**TGA**  
>OeuSIP1;1\_Oeu050292.1  
**ATG**GGTGCTATAAAGGCAGCGGTAGCCGATGGGGTGTTGACTTTTATGTGGGTTTTTTGCGCATCGACTTTGGGC  
GCACTCACTTTTGTGGTGGCTTCTGCTCTCGGAGTATCCCAAGGACTACCCACTCTTCTCGTCACTACTGTCTT  
GTTTTTGTACTGCTGTTTCGTGTTTCGGCATCATCGGCGATTTCTTGGGCGGCGCCACCTTCAATCCCAGTCAATC  
GCTGCTTTCTATGCCGCTGGTATTGGAGGCGCCGATTCTCTCTTCTGCTGCCCTCCGCTTTCTGCCCAGGCG  
GCTGGTGCAGTAGGTGGTGTCTTTGCAATTATGGAGTTATGCCAATGCAGTACAAACACATGCTTTGGGGGTCTT  
TCATTGAAGGTTGACCTGCACACTGGAGCTATTGCTGAGGGCGTTTTGACTTTCACAATTACCTTTGCTGTCTT  
CTCATAGTCTTAGGGGTCCAAGCAACCCACTAGTGAAGAATTGGTTGCTTGCCATGGCAACTGTTTCGGCAGTC  
GTTGCCGGTTCAAGTTATACTGGACCTTCGATGAATCCTGCCAATGCATTTCGGGTGGGCATATGTATATAATAAG  
CACAAACACATGGGAGCAATTCATGTTTACTGGATCTGTCCATTCACTGGAGCAATATTGGCTGCGTGGACCTTC  
CGCTTTCTATTCCCGCCCCCAACAAAGCAGGACAAGGCGAAGAAAGCC**TGA**  
>OeuSIP1;1\_Oeu050292.1  
MGAIKAAVADGVLTFMWVFCASLTGLALTFFVASALGVSQGLPTLLVTVLVFVLLFVFGIIGDFLGGATFNPTAI  
AAFYAAGIGGADSLFSAALRFPQAAGAVGGALAIMVMPMQYKHLGGPSLKVDLHTGAIAEGLTFTITFAVL  
LIVLRGPSNPLVKNWLLAMATVSAVVAGSSYTGPSMNPANAFGWAYVYNKHNTEQFYVYWICPFTGAILAAWTF  
RFLFPPTKQDKAKKA\*

## OeuSIP1;2 Oeu014723.2

>OeuSIP1;2\_Oeu014723.2 | Scaffold1584:16236..19503 reverse

**ATG**AGGGCAATTAAAGGTAGCAATCGCCGATGCGATAGTGACGTGCTTGTGGGTTTTTTGTGCATCGTCGTTGGGT  
GCACTCACTTTTCGTTGTGGCTTCTGCTTTTGGGGTTAGCCAAGGCCTGCCTACGCTTTTGATCACCCTTTCTC  
CTTTTGTCTTTTGTGTTGATTTCGGATTTATTGGAGATCGCTGGGAGGCGCCACCTTCAATCCCACAGTCCC  
CGCGCTTTTATCGCCGCGGCTTGGAGGCATGAGTCTCTTGTGACGCGCCGCTCCGCTTCTCTGCTCAG**GTG**  
ACCTCTTCTTGTACGATTCTCATGTTTTCGTTTAAATGGTCTATGTTATTGCTTTGCAAGATTATAAGTATTAGAAA  
GCAAAAAATTCAGTCGTTTTGTCTATAGCCGTAGGCCATACGTCAATAATTCAATGCTGAATCATTTCGATTCCAT  
TGGTGACGGGACATAGAATGTGGATTTTGAAGAGAGATTCAACCACTACAAAAAGATCGATTTTTCGGGATCCTT  
TCTTAAAGGGGAGGAAAAGGTGTAATAATCAGACCAATTTCGTACAATTCCTTTCTGGATATTCCTTAGTGTTCCG  
GCTATTTCATGAAATGTGAGATGATGATTGTAAGTGAAGTCCAAATCCTTGACATCAAGCCGAGTGACTTTTGATCC  
TTGCAAGATGATTCTTGGAATTTGTATGACTCGTTTTTCTTCTGTACATGACGAAGATTAGTAGATCATCTTGGA  
TTGTATGCAGGGCCTGGCTCTGAGATCTTGATGTCCAGTGTGAAATTTCAAATGGGCCCCCTTTTTTCATAAAT  
ATTGTGCCCTTTAACTAACATAATAATAAAAAATTTTAAATTTTAAAAATTACTATATATAACAAAAAATATTTTGG  
TGCCCCACAAAGCTTGAGGCCTTGTGCGGTTGCCCCACCTGCGCACCTTAGGGCCACCTCTGATTGTATGACTC  
GCTTGTACTTTGTAAATGACAAAGATTAGAGGATTGCTGGCATTGAAATATAGTTTAGATTGCAATATTTAAAA  
TTTGCAATGCTTAAGTTTCAGGCAGTTGAACACTTGATTCATGCTAATCTGATCATGAAGAACAATGAGGTTCAG  
AAGAGCTAAACGTGCTGTGAAAGAGTGGAATGAATGGATGGAACCAATAGACTCTTTTGTAAAAATCGTA  
AATTATTTTGTGGTGTCTTTCAGAGGCAGCTGGTGCAGTAGGTGGTGCACCTTGGGATTCTAGAGGTTATGCCAGT  
GCAATACAAGCACATGCTAGATTGTCCTTCTTTGAAAGTGCATTTGAATACAGGAGCAATTGCTGAGGGAGTATT  
GACCTTCATAATTACCTTTGCTGTCTTTACATTGTCCTGAGGGGTCCTACCAACCCATTTGTGAAGAATTGGTT  
GCTAGCTATGTCAACTGTTGCCTTAGTGTTGCAGGTTTCGAGTTATACTGGACCTTCCATGAATCCTGCAAAAT**GT**  
AAGTCCCCTCTCTTTACGTTCCCTTTTATGATAAATCATGGGCAATTTATGGTAAATCTTGTCTTACATGCA  
ATGAATTTTCTTCAATCAAGTTATAAGAACTTTAGAGTGTTTCTTTGCTTAGCATAATAGCAGAAATATCCAC  
ACCATTATTTTGTGTTATTTATATCTTTCAAATTCCTTGTTAGATTTTATTATATTCTTTCTTAATCATGCTTCT  
CTCTGCATCAAAATCTGATTAAGATGCCAGGTATAGATTGATCTTTGACATCTATAAGCACAAACGAGTGATGC  
TTGGTGTAACATAGATGGAAGCTAAATAACAAAATTTAAGTTTCTTTTTATTCTAAATAGTGGTCAATGTTAA  
CAATTCCTTTCTAGCAAACATGCCATTAGATTATTGTCCATCAATGCTGACTGAACATATGGGATTCCACGTCTTT  
CTTGCTACTTACTAGTTCGGAATGTAAGCTAGTAAATGTTTTCGGCTCTTGACTTCACCATCTATGGTGTGCTTCGT  
TTGCGCAGCAGCAGTATTGTATTGCCCGCCCAACAACTGTTTTCAGAGTTGATCTATGATGGATCTGTGACCGCG  
CGCATAATTTTAAAGATCTCAATTCAATTGCACTGTCTGCTTAATATTGCAATCACTCTTAATAAGCCCCGTT  
TGGCCCCCATCCCTTCAAATTTTAAATGGTTGGAATAATTTTTTTTTGAAAAATGTGTTGTTGAAAAAGAATGAAAA  
GTTTTTGTATTTGCATGTAATATTATTTTATGGAAGATTATGTAGTTGAAAAATAAGAAAAAAGAAAGAGAGAA  
GGAGAATGGGAGCCAAACGGGGCCATAGTAGCAAGCTTCTCAACCACTCAATCTTTGCCATTTTCCCTAATTGCA  
AGCTTGCAATGACCTATTAATTCCTGCAATCCAAAACCTGAACTAGAGTTCTAAAATATGATTTTCTTTAAAT

AACTTTACCTTTATGGTGCGTTTGATTGCAAGTATGAAATTTGCATAGAAAGAAAATAAATTATAGGTAATTTAA  
TTGCCCTAGAACTTATTTGTATGAAAATTATCAATTAAATGTGTTTGATTGATTTAATTTTTAGCCTTAAAAATA  
TTATACTTGTCCAATTTTTATTTGTGGTTAGATGAGAGAGTGGATGAATAAGAAAGTGAAAGGAGAAAAATCCGT  
TGGAAAATAAAATCCTACTACACCTAAAGAAAACATTTTCCTTGATTTTGAGGAAAATATGGTCACATGACCAAA  
AGTAGGAAAATGTTTTTCATGGAAAAAGTCAATCAAACAGTATAAAAGTAGGAATTTGGGTGAAAAAATACATT  
TTTCATGGAAAATATTGACAATCAAACGGACCCTTAGTTTTTCGATACATTATAAGTTTGAATTTAATATCACTA  
TAACAAACGAGCTAATCAGTCATTCAACTTTGCAACATATGTGCTGATTTTCAGAAAGTTTCCATACATTGTTGT  
TTTTATCACTTGTTATTGTTCTCCTATCCCTTCTGCTTATTTTCGTGCTCTTTATCTATAAATGGATCATATGCT  
CCTTATCATACATCTTAATCTATATCTAATATCTTTGCAGGCCTTTGGCTGGGCATATGTAAACAATACGCACAA  
AACATGGGAGCAATTCTACGTCTACTGGATCTGCCCCTTCATTGGAGCAATATTAGCTGCGTGGGTTTTCCGTTT  
TCTATTTCCGCCTCCTCCAGTCAAGAAGCAGAAGAAAGCC**TGA**

**>OeuSIP1;2\_Oeu014723.2**

**ATG**AGGGCAATTAAGGTAGCAATCGCCGATGCGATAGTGACGTGCTTGTGGGTTTTTTGTGCATCGTCGTTGGGT  
GCACTCACTTTTCGTTGTGGCTTCTGCTTTTGGGGTTAGCCAAGGCCTGCCTACGCTTTTGATCACCACCTTTCTC  
CTTTTTGTTCTTTTGTGTTGATTTCGGATTTATTGGAGATGCGCTGGGAGGCGCCACCTTCAATCCCACAGGTCCC  
GCCGCCTTTTATGCCGCCGGCGTTGGAGGCACTGAGTCTCTTGTGACGCGCCGCGTCCGCTTTTCTGCTCAGGCA  
GCTGGTGCAGTAGGTGGTGCCTTGGGATTCTAGAGGTTATGCCAGTGCAATACAAGCACATGCTAGATTGTCTT  
TCTTTGAAAGTCGATTTGAATACAGGAGCAATTGCTGAGGGAGTATTGACCTTCATAATTACCTTTGCTGTCTT  
TACATTGCTCTGAGGGGTCTACCAACCCATTTGTGAAGAATTGGTTGCTAGCTATGTCAACTGTTGCCTTAGTG  
GTTGCAAGTTTCGAGTTATACCTGGACCTTCCATGAATCCTGCAAATGCCCTTTGGCTGGGCATATGTAACAATACG  
CACAAAACATGGGAGCAATTCTACGTCTACTGGATCTGCCCCTTCATTGGAGCAATATTAGCTGCGTGGGTTTTC  
CGTTTTCTATTTCCGCCTCCTCCAGTCAAGAAGCAGAAGAAAGCC**TGA**

**>OeuSIP1;2\_Oeu014723.2**

MRAIKVAIADAIVTCLWVFCASSLGALTFFVVASAFGVSQLPTLLITTFLLFVLLFVFGFIGDALGGATFNPTGP  
AAFYAAGVGGTESLVSAAVRFPQAAGAVGGALGILEVMPVQYKHMLDPCSLKVDLNTGAIAEGLVTFIITFAVL  
YIVLRGPTNPFVKNWLLAMSTVALVVAGSSYTGPSMNPANAFGWAYVNNTHKTWEQFYVYWICPFIGAILAAWVF  
RFLFPPPPVKKQKKA\*

## **OeuSIP2;1 Oeu060749.1**

**Observation:** 3' extended by 261n, generating 1 intron and 1 exon

**>OeuSIP2;1\_Oeu060749.1 chr9:9170322..9172233 forward Original version**

**ATG**GCTGCCGTAGGAGGAAGGCTGCTGCTAGTGTCGGATTTCTTTATGTCGTTTCATGTGGGTTTTGGTCTAGCGTG  
CTTATCAAGATTTTTGTGTATAAAATATTGGGCTATGGCACCCATGATTTGAAGGGTGAAATTTCTGAGGTATGGA  
ATCTCCCTTGTCAACATGTTCTTCTTTGCATACTTGCCAAAGCCACCAAGGGTGGGGCTACAACCCCTCACC  
ATCTTGTCTCCGCCATCTCTGGGGATTTTCAGCAATTTCTCTTCACTGTGCGGGCCAGAATTCCTATCCAG**GT**  
**CGCTGAGTGCAAATGTTTTAACTCTTGTTTCTCTAATTATTATGCTATTTTTTCGTTTTAGGAAACATTGTGGCTC**  
**GATAAATTTGGCGATTGATGCGTGTAATTATGTGCATAAATTGACGTTTTGTTTGGTGTGACATTGAATTAGAGA**  
**AATTCGATGATGATTCTTCTCTTTATTTTCAGGAATGCTTGCTTTTGGGTTGCTCGTAAATTCGGATTAGGGCAT**  
**GCAATAAATCTCTGAGTTTAAGCCAAAAATTTCTATTTCTTTTTTGGAAAGTGAATTGATCTAATATCTAAAAACC**  
**TTATACAGTGTAGGTAGGTAAAAGTAATTTTATTACTGAAAGAGCTTAAGAAATTTAGGGATTTGACCTTGAAAG**  
**AAGATTATTCTCAGTTAATGTTAGTTAAGCTAAATCTTGTGGTAAAAAAAAGTCTCATTGCCATATATTCAAGA**  
**CTCATTCTCAGTTAATAATTTATGAAAACCTGATGTGTGTTTGTGATTGATTGTACGAACATAAGATTGCAAT**  
**ATGATTAAGAGGTCTAAGTTACAATACTGTACTTGTGGAAGAAGTGGGACAGTGGAGATATCTTGTAGTTTGGC**  
**AAATTCTTTGCTGATAATTCTGTAGAACCGAGCTCCACGTACAGGACTTCTAATTCTGTATCTACATGTAGGAC**  
**TTTCTTATTCGAGGTTTCTAATTTGGAATTGTTCTCAACTAGTCGAATTTCTTTTACCACATAGTTTTTGTACCA**  
**TTATCTTCTTATTTAGCCCCGTTTGATGGGCTTTTCTTCAAAGTCTTTTATCTATATACTCATTTTCATCCACA**  
**CATTACACAATAAAATATTATGTACGTAAACTCAAACTTTTCCTTACTTTTAACTATACATTCTCCAAAAAT**  
**TCGCTATTCAAAGCATTATTTTTCCCAAGTAATGGCCATCAATCAGGGGCTTAGAGAACATCCCTTTTCCCGTGT**  
**TGTCAGTGTGTCAGTGCTTCTAGTTTCTTTCTCTCTCAGAGAGGTTATGAAGAGTAGTAATTTTCAAACCTCATA**  
**GTTTTATTACATAATCGTCTGATAGTCATCTGGAAATAAAAGACTCGTCATGCTTTTTTAAATGACTTCTGGAAGTTG**  
**AGTTAAAGATGATTGCCCCGTTTGTGTTTTCCATTAAAAATGAAAAATATGATCGTTATCCATCACATCAAGGCACCA**  
**AATTTGAATTTCTATCTCTGTGGGGCCCATACGACTATATTTTTTCATTTTCATTTTGCAAAAATAAGAAACAA**  
**ATGCCCCCTTAGTTTTTTTTACCGGCGCATACCCCTATTTTTGTTCTTCCATCTCTCTTTTAAAGGTCTTGGGGTC**  
**TATTTATGGAGTTAGGTTTATTCTCGCGGCATTTCTGAAATAGGACGTGGGCCACGTCTGAATGTTGACATAGC**  
**TCGAGGTGCATTGACTGAAGTCTTTTGACATTTGGGATTGTGATTATATCCCAAGGGCTCTCGAGAAAAATTC**  
**CGGAAGTTTCTTCAATGAAGACTTGGATCTCAGCGTCTCAAAGCTCACTCTTCACATTCTCGGCTCTGATCTGAC**  
**TGGAGGATGCATGAATCCAGCCTCTTTAAGTACT**TAA****

>OeuSIP2;1\_Oeu060749.1 | chr9:9170322..9172494 forward **Corrected version**

**ATG**GCTGCCGTAGGAGGAAGGCTGCTGCTAGTGTCGGATTTCTTTATGTTCGTTTCATGTGGGTTTGGTCTAGCGTG  
CTTATCAAGATTTTTGTGTATAAAATATTGGGCTATGGCACCCATGATTTGAAGGGTGAAATTCTGAGGTATGGA  
ATCTCCCTTGTCAACATGTTCTTTTGCATACTTGGCCAAAGCCACCAAGGGTGGGGCTACAACCCCTCACC  
ATCTTGTCTCCGCCATCTCTGGGGATTTTCTCCTTCACTGTCTGGGGCCAGAATTCCTATCCAG**GTT**  
**CGCTGAGTGCAAATGTTTTAACTCTTGTTTCTCTAATTATTATGCTATTTTTCGTTT**TAGGAAACATTGTGGCTC  
GATAAATTTGGCGATTGATGCGTGTAATTATGTGCATAAATTGACGTTTTGTTTGGTGTGACATTGAATTAGAGA  
AATTCGATGATGATTCTTCTCTTTATTTTCAGGAATGCTTGCTTTTGGGTTGCTCGTAAATTCCGATTAGGGCAT  
GCAATAAATCTCTGAGTTTAAGCCAAAAATTTCTATTTCTTTTTTGGAAAGTGAATTGATCTAATATCTAAAAACC  
TTATACAGTGTAGGTAGGTAAAAGTAATTTTATTACTGAAAGAGCTTAAGAAATTTAGGGATTTGACCTTGAAAG  
AAGATTATTCTCAGTTAATGTTAGTTAAGCTAAATCTTGTGGTAAAAAAGTCTCATTGCCATATATTCAAGA  
CTCATTCTCAGTTAATAATTTATGAAAAGTGTGTGTGTTTGTGATTGATTGTACGAATAAGATTGCAAT  
ATGATTAAGAGGTCTAACTTACAATACTGTACTTGTGGAAGAAGTGGGACAGTGGAGATATCTTGTAGTTTGGC  
AAATTCCTTTGCTGATAATTCTGTAGAACCGAGCTCCACGTACAGGACTTTCTAATTCGTATCTACATGTAGGAC  
TTTCTTATTCGAGGTTTCTAATTTGGAATTGTTCTCAACTAGTGAATTCTTTTACCACATAGTTTTTGTACCA  
TTATCTTCTTATTTAGCCCCGTTTGATGGGCTTTTCTTCAAAGTCTTTTATCTATATACTCATTTTCATCCACA  
CATTCACACAATAAAATATTATGTACGTAAACTCAAACCTTTTCCTTACTTTTAACTATACATTCTCCAAAAAT  
TCGCTATTCAAAGCATTATTTTTCCCAAGTAATGGCCATCAATCAGGGGCTTAGAGAACATCCCTTTTCCCGTGT  
TGTCACGTGTCAGTGCTTCTAGTTTCTTCTCTCTCAGAGAGGTTATGAAGAGTAGTAATTTTCAAACATCATA  
GTTTATTTCATAATCGTCTGATAGTCATCTGGAATAAAAGACTCGTCATGCTTTTAAATGACTTCTGGAAGTTG  
AGTTAAAGATGATTGCCCCGTTTGTGTTTCCATTAAATGAAAAATATGATCGTTATCCATCAGTCAAGGCACCA  
AATTTGAATTTCTATCTCTGTGGGGCCATAACGACTATATTTTTCATTTTTCATTTTTCGAAAAATAAGAAACAA  
ATGCCCCCTTAGTTTTTTTTACCGGCGCATACCCCTTATTTTTGTTCTTCCATCTCTCTTTTAAAG**G**TCTTGGGGTC  
TATTTATGGAGTTAGGTTTCATTCTCGCGGCATTTCTGAAATAGGACGTGGGCCACGTCTGAATGTTGACATAGC  
TCGAGGTGCATTGACTGAAGGTCTTTTGACATTTGGGATTGTGATTATATCCCAAGGGCTCTCGAGAAAAATTCC  
CGGAAGTTTCTTCATGAAGACTTGATCTCCAGCGTCTCAAAGCTCACTCTTCACATTCTCGGCTCTGATCTGAC  
TGGAGGATGCATGAATCCAGCCTCT**TTAAGTACTTAATAATCATTCTATGCATAATCTATGTTTACTGCCGAATT**  
**TTGTTGGATGCACACTGAGTAAATTTTAATTGCATCTCCAGGTAATGGGGTGGGCTTTTGCACACGGAGAACA**  
TATAAGCAAGGAGCATTTAATTGTGTACTGGCTTGCTCCTATGGAGGCAACTTTGGCAGCAGTGTGGGCATTTAG  
ACTGATAGTTTCGGCCCAAGAAAGACGAGACACTAAAGGCGAAGTCCGTAATAATCAGATTGTAAGAACAGT**TGA**

>OeuSIP2;1\_Oeu060749.1

**ATG**GCTGCCGTAGGAGGAAGGCTGCTGCTAGTGTCGGATTTCTTTATGTTCGTTTCATGTGGGTTTGGTCTAGCGTG  
CTTATCAAGATTTTTGTGTATAAAATATTGGGCTATGGCACCCATGATTTGAAGGGTGAAATTCTGAGGTATGGA  
ATCTCCCTTGTCAACATGTTCTTTTGCATACTTGGCCAAAGCCACCAAGGGTGGGGCTACAACCCCTCACC  
ATCTTGTCTCCGCCATCTCTGGGGATTTTCTCCTTCACTGTCTGGGGCCAGAATTCCTATCCAGGTC  
TTGGGGTCTATTTATGGAGTTAGGTTTCATTCTCGCGGCATTTCTGAAATAGGACGTGGGCCACGTCTGAATGTT  
GACATAGCTCGAGGTGCATTGACTGAAGGTCTTTTGACATTTGGGATTGTGATTATATCCCAAGGGCTCTCGAGA  
AAAATTTCCCGGAAGTTTCTTCATGAAGACTTGATCTCCAGCGTCTCAAAGCTCACTCTTCACATTCTCGGCTCT  
GATCTGACTGGAGGATGCATGAATCCAGCCTCTGTAATGGGGTGGGCTTTTGCACACGGAGAACATATAAGCAAG  
GAGCATTTAATTGTGTACTGGCTTGCTCCTATGGAGGCAACTTTGGCAGCAGTGTGGGCATTTAGACTGATAGTT  
CGGCCCAAGAAAGACGAGACACTAAAGGCGAAGTCCGTAATAATCAGATTGTAAGAACAGT**TGA**

>OeuSIP2;1\_Oeu060749.1

MAAVGGRLLLVSDFMFMSFVWSSVLIKIFVYKILGYGTHDLKGEILRYGISLVNMFFFAYLAKATKGGAYNPLT  
ILSSAISGDFSNFLFTVGARIPIQVLGSIYGVRFILAAFPEIGRGPRLNVDIARGALTEGLLTFGIVIIISQGLSR  
KIPGSFFMKTWISSVSKLTLHLGSDLTGCCMNPASVMGWAFAHGEHISKEHLIVYWLAPMEATLAAVWAFRLIV  
RPKKDETLKAKSVKSDCKNS\*

## OeuSIP2;2 OeuChr11

>OeuSIP2;2\_chr11 chr11:18362597..18364222 Reverse

**ATG**GCGGCCGTAAAGAGGTAGGCGGCTGCTGGTGTCTGGATTTCTTGATGTCTTTCATGTGGGTTTGGTCCAGTGTG  
CTCATTAAGATTTTTGTTTATAAAATATTGGATTATGGCTCCCATGATATGAAGGGTGAAATTTTGGAGGTATGGA  
ATCTCCATTGTCAACATGTTCTTTTGCATTCTTGGCCAAAGCTACCAAGGGTGGGGCTACAACCCCTCACC  
GTCTTGTCTCCGCCATTTCTGGGAATTTTCTCCTTCACTGTCTGGGGCCAGAATTCCTGTCCAG**GTT**  
**CGCTAGATACAATTGTTTTAAATCTTGTTCTTTAATTATCATGTACCCGTTTGT**TTTAGGAAATATTGACAGTT  
TCTTTTGTGAGGGACATTGAATTAGAGAAGTTAGATTGATGGTTCTTCTCTTTATTTTAGGACTTCATGTTTTTG  
GCTTAATCGTAAATTTGATTAGGGCCTGCATCTTAAATCAATCTGGGAGTTTCAGTAAATACGTTCTATTGATTA  
TTTGGCAAGTGAATTGATAGATAATCTGAAACCATATACATGGTAGGCTTAGTGAAAGCAGCAATTTCAATGATT  
GTCACATGTTATTGGAATATCTTAAGAATCATTCAAAAAATCGAAGAAATGATCAAAACAAAATGATTTTTTGAATT  
GTATTCCAGAAAAATTTTATTCACAAATAAACTATATCTCGTTATCTTGGCAAATTTTGGAGGCTAATTATAT  
ATCTGCATGTAGGACTTTCTTTCTTATCCAAGATTCCCCCAATTCGACATCTTCTCAAATATCAACTATAAAAA  
ATTCTTTCCCACTTACTTTGTGTTCCAATATCTATACTTATTTAGAGAGTTCCCTTTTCCCATTTTGTTAAT

GCTGACACGATGAATGGATCGTTGTTCTCCAGAAAAACCCCTCAGACAGGTTGTGAAGAGGAATGACATGGTGTTC  
TTAAAATAAGTGTTCCAAAACCTCATAGTTTGTTCATAATCATCATCTGGAAGTTGAGTTAAGATGGTTTAGTTGT  
GTACTGGAGCTTATCCTTGTTCTTCCATTTCTTTTTCAAAGGCTTTGGGGTCTATTTATGGGGTCAGGCTCATTC  
TTGCGGCATTTCCAGAAATAGGACGTGGGCCACGTCTGAATGTTGACATAACTCGAGGTGCATTGACTGAAGGGT  
TTTTGACGTTTGGAATTGTAATTATATCCCAAGGGCTCTCGAGAAAACCTCCTGGAAGTTTCTTCATGAAGACTT  
GGATCTCAAGCGTCTCGAAGCTCACTCTTCACATGCTTGGCTCTGATCTGACTGGAGGATGCATGAATCCGGCAT  
CTGTAAGTACTTATATTCAGTCTAAATGTAATCTATGCTTACTGCGGAATTGTGTTGGATACATTACACTTGAAT  
GAACATCGAGTAAATTCTAATTGCGTCCCTCAGGTAATGGGGTGGGCTTTTACACGCGGGGAACATATAAGCAAG  
GAACATTTAATTGTATACTGGCTTGCTCCTATGGAGGCGACTTTGGCAGCAGTGTGGGCATTTAGAGTTGTAGTT  
CGACCCGAGAATGATAAGACACCTAAGGTGAAGTCCGGAATAATCAGAA**TGA**  
**>OeuSIP2;2\_chr11**  
**ATG**GCGGCCGTAAGAGGTAGGCGGCTGCTGGTGTGCGATTTCTTGATGTCTTTCATGTGGGTTTGGTCCAGTGTG  
CTCATTAAGATTTTTGTTTATAAAATATTGGATTATGGCTCCCATGATATGAAGGGTGAAATTTTGAGGTATGGA  
ATCTCCATTGTCAACATGTTCTTCTTTCATTCTTGGCCAAAGCTACCAAGGGTGGGGCCTACAACCCCTCACC  
GTCTTGTCCTCGGCCATTTCTGGGAATTTTCAGCAATTTCTCTTCACTGTCTGGGGCCAGAATTCCTGTCCAGGTC  
TTGGGGTCTATTTATGGGGTCAGGCTCATTTCTTGCAGCATTTCCAGAAATAGGACGTGGGCCACGTCTGAATGTT  
GACATAACTCGAGGTGCATTGACTGAAGGGTTTTTGACGTTTGAATTGTAATTATATCCCAAGGGCTCTCGAGA  
AAACTTCTGGAAGTTTCTTCATGAAGACTTGGATCTCAAGCGTCTCGAAGCTCACTCTTCACATGCTTGGCTCT  
GATCTGACTGGAGGATGCATGAATCCGGCATCTGTAATGGGGTGGGCTTTTACACGCGGGGAACATATAAGCAAG  
GAACATTTAATTGTATACTGGCTTGCTCCTATGGAGGCGACTTTGGCAGCAGTGTGGGCATTTAGAGTTGTAGTT  
CGACCCGAGAATGATAAGACACCTAAGGTGAAGTCCGGAATAATCAGAA**TGA**  
**>OeuSIP2;2\_chr11**  
MAVRGRRLLVSDFLMSFMVWSSVLKIFVYKILDYGSMDKGEILRYGISIVNMFFFAFLAKATKGGAYNPLT  
VLSSAISGNFSNFLFTVGARIPVQVLGSIYGVRLILAAFEIGRGPRLNVDITRGALTEGFLTFGIVIIISQGLSR  
KLPGSFFMKTWISSVSKLTLHMLGSDLTGCCMNPAVMGWAFTRGEHISKEHLIVYWLAPMEATLAAVWAFRVVV  
RPENDKTPKVKSGKSE\*

## OeuSIP-related, considered as Pseudogenes

### Oeu061896.1 OeuSIP1-related

**>Oeu061896.1 | chr22:4366217..4368873 forward**  
**Incomplete sequence**

**>Oeu061896.1**  
**ATG**GGTGCTATTAAAGCAGCGGTAGCCGATGGGGTGCTGACTTTTATGTGGGTTTTT**TAAACATCGACGTTGGGC**  
**CGCACTCACTTTTGTGGTAGCTTCTGCTCTCGGAGTATCCCAAGGCCTACCCACTCTTTTCACTACTGTTCT**  
**CGTTTTCTCCTGTTGATCTTGTTCGGCATCATCGGCGATGTATTGGGAGGCGCTACCTTCAATCCCACCTCCT**  
**CGCCGCCTTCTATGCCGCTGGTATTGGGGGCGCTGATTCGCTAGTCTCTGCCGCCCTCCGATTTCTGCCAGGC**  
**ATGACTTGCCTACTCTTCATTTTTAGATTAGTCAGATATTAAACACAGTATGCAATCATCCTACTGACTTGATTC**  
**AAACGTAGATTAATAAGTGGAAATTCTCAATTGATGATATGTTTGTGAAAATCTAGATTGCTCAGGGCTAGGCTA**  
**GATATAATGAACTCGAGATAATAAGAATAAAAAATGAACCTCCAATTTTTTAAAAAATTCACAGATTTTAACTG**  
**AACGACCAAATTACAACAAAAGGCAAACCTTGAATAATGAGTTTGACAAAATAAAGTTCGGTGACTAATGCGAAG**  
**CTTTGCCATAAGTTAAGTAAAGTTATGCAAGGAATGAGAATGGTAAAGCCGTTACTTGTATCCTTGACAGGCAG**  
**CTGGTGCAGTAGGTGGGGCTCTTGCAATTATGGAGGTTATGCCGATGCAGTACAAACACATGCTTGGGGGTCCCTT**  
**CTCTGAAGGTTGACTTGCACACTGGAGCCATTGCTGAGGGAGTTTGTGACGTTACAGATCTCTTTTGCTGTCCCTC**  
**TCATCGTCCTTAGGGGTCCAAGCAGCCCACTTGTGAAGAATTGGTTGCTTGCCATGTCAACTGTTTCGCTAGTCG**  
**TTGCCGTTCAAGTTATACTGGACCTTCGATGAATCCTGCAAATGTAAGTGGTGCATCTCTTTTCCGTTCTTTTG**  
**CTAGATTTTGAATAGTATAAGATGATATATCTATGCTTATTGTAGAATATTCTAAATCCTTTAAATTTGCAGA**  
**CTAAAGAAACAAAATAACATGAGGTGAGAGTTTCTCCTTCTATAGCACAAAATGAAAAGATATCTGCCAAACAT**  
**TTTGTATTTAACTTTTTTATTTTCATATCCCAAATGCCAAATAGAATATAGAAGTTACTTTTCCCATTTGATGGTA**  
**CATGATTGTGTATCTTTTGCAATCAAAGTGAGATTGGTAATGTGATCGAGCTTTGACATTCGGAGCACAAATCAGA**  
**GTACTGTTCTCTTGACTTAATTTTTGGATTAGGAATGTGATTTGGTCCCATATTTACATTTATGGGGTTCCTC**  
**ATCCCATCATTATTGTCCCGTTATGGGGTGTCAAATTATCGAGATCCTCAACTACCAGGTTTCTATATGAGAACT**  
**TTAGGAAAGAATGCTACTAGATTCTATTTTCTCTATGCACCAAACCTGTAAGTATCCTCAAATGCCGTCACCTT**  
**AATTAGGACTTTGTAGCACACAGTAATACTTTCTTTTACACTCACGTTAAATTTGTTTTGGAAGATCCATCTTT**  
**CTTTAACTTCTGACGCTTTTCGACGTGATTGGATTTTTCTCCTTCTTTTGAAGAACCAATCATTTTCTTATTGA**  
**GACCCGAAAACACCAGCTTGATTAATTAACCTTTCCAATTCAAAGAGCTTTAACTTTGCTCCTTTTTCTTCAATCA**  
**TGTATGTCTTCAAATAATGAATGGGACACAGTCTGTTACAAAGCCAAATAATAATTTAGACTTTGATTCATGTT**



TAGCTTATCTTAAAGTCTCTTTAGTTACATTTGCAAATTGCTAATCTCAAATCGTGAACATAAAAAATGTGCGGAGA  
ACTTTTGAAGCATAACTTTAACATTTTAAAGCAGTAATTAATTAGTCAAACTGCTCTCTAGATATTGGCTATAT  
GCCAAATTTTTAGGTAGAGTTTTAGGACATTATAAGAGTTTTGATCTGTAACGCGGTCAAATTTGTTCTTTCTGT  
GTATTTTCTTGAATCTGGAAAGTCAAAATTGTTCTTTGAAGTCTTATATTTGCATCTTATTTCTTGATTCTCTTC  
TTCCCTAATCTGACTTATCTATTCTCAAAATTGTTAGAAGATATTTGCAAAGTGATAGTTTTGAGCATGTGCAG  
TCAGAAGTTTCTTAGTGTAGAATACTTCTGATTTTCATGCCCTTCAATTAAGTTGCCAAACATAGTTTTCGGATT  
CTAGTTTTGACATTTGTAATGTGGTTTACATGGGACGGCTTAGCCTCACAGAGAAAAGCTACAACCTGGAGTTC  
AAATCACTTTTAGTTCCATAACTACTGCAAAATGGATTGGCTGTGCTTTAGTCTGGTTTCTTAGAACAAGTTTGC  
TAATATCAGAACATCTTGTGCAATTCTTTCTTTCTTAATTTGATATTTCTCGCAAACTTGTGTTATAACTGGCT  
TTCAATTGTGCCTAATATCATTGCAGGCGTTTGGGTGGGCTTATGTACATAATAAGCACAAACACATGGGAGCAAT  
TCTATGTTTATTGGATCTGTCCCTTCGTAGGAGCAATATTGGCTGCGTGGACATTTGCTTTCTATTCCCGCCCC  
CATCAAATCAGCACAAAGGCGAAGAAAGCC**TGA**

>Oeu061896.1

**ATG**GGTGCTATTAAAGCAGCGGTAGCCGATGGGGTGCTGACTTTTATGTGGGTTTTTGCAGCTGGTGCAGTAGGT  
GGGGCTCTTGCAATTATGGAGGTTATGCCGATGCAGTACAAACACATGCTTGGGGGTCCTTCTCTGAAGGTTGAC  
TTGCACACTGGAGCCATTGCTGAGGGAGTTTTGACGTTACGATCTCTTTGCTGTCTTCTCATCGTCCCTTAGG  
GGTCCAAGCAGCCCACTTGTGAAGAATTGGTTGCTTGCCATGTCAACTGTTTCGCTAGTCGTTGCCGGTTCAAGT  
TATACTGGACCTTCGATGAATCCTGCAAATGCGTTTGGGTGGGCTTATGTACATAATAAGCACAAACACATGGGAG  
CAATTCTATGTTTATTGGATCTGTCCCTTCGTAGGAGCAATATTGGCTGCGTGGACATTTGCTTTCTATTCCCG  
CCCCCATCAAATCAGCACAAAGGCGAAGAAAGCC**TGA**

>Oeu061896.1

MGAIKAAVADGVLTFMWVFAAGAVGGALAIMVMPMQYKHM LGGPSLKVLDLHTGAIAEGVLTFTTISFAVLLIVLR  
GPSSPLVKNWLLAMSTVSLVVGSSYTGPSMNPANAFGWAYVHNKHNTWEQFYVYWICPFVGAILAAWTFRFLFP  
PPSNQHKAKKA\*

## Oeu050293.1 OeuSIP-related

>Oeu050293.1 | chr4:9356974..9357960 reverse

Incomplete sequence

Intron 2 and Exon 3 truncated

>Oeu050293.1

**ATG**GGTGCTATAAAGGCAGCGGTAGCCGATGGGGTGTTGACTTTTATGTGGGTTTTTTCGCGCATCGACTTTGGGC  
GCACTCACTTTTGTGGTGGCTTCTGCTCTCGGAGTATCCCAAGGACTACCCACTCTTCTCGTCACTACTGTCCCTT  
GTTTTTGTACTGCTGTTTCGTGTTTCGGCATCATCGGCGATTTCTTGGGCGGCGCCACCTTCAATCCCACTGCAATC  
GCTGCTTTCTATGCCGCTGGTATTGGAGGCGCCGATTCTCTCTTCTCTGCTGCCCTCCGCTTTCCTGCCAG**GTA**  
**TGA**TCATGTGATTAGTCAGATATTGATCATGTTTCTTGAGAGTATGTAATCCTACTTGCTTGATTCAAATGTAG  
ATTAGTATGTGAATATTGTTCAGTCGATGATATGTTTGTGAAAATCTAGATTGCTTAGGGCTAGATCTATATAATG  
GAATTTAAGATTTTAAAAAAGGAGGTCTCCCTTGACAGATGATATAGTTGAGAAAACTAACAGATTTGAACTG  
AACGACCAAATTTAAATAAAGGCACACATGAATAATGAGTTTGCAAATAATAAACTTTGGTGACTAACACGAAA  
ATTTTACCACAATTTAAGTGTATACTATGCAGGGAATGAAAATGCTAAAGTTATTACTTTTATCCTTGACAG**GCG**  
GCTGGTGCAGTAGGTGGTGTCTTGTCAATTATGGAGGTTATGCCAATGCAGTACAAACACATGCTTGGGGGTCCCT  
TCATTGAAGGTTGACCTGCACACTGGAGCTATTGCTGAGGGCGTTTTGACTTTCACAATTACCTTTGCTGTCCCTT  
CTCATAGTCCTTAGGGGTCCAAGCAACCCACTAGTGAAGAATTGGTTGCTTGCCATGGCAACTGTTTCGGCAGTC  
GTTGCCGGTTCAAGTTATACTGGACCTTCGATGAATCCTGCCAATGTAAGTGACATATCTCTTTTCCATTCTATC  
GCTAGATT**C****TGA**

>Oeu050293.1

**ATG**GGTGCTATAAAGGCAGCGGTAGCCGATGGGGTGTTGACTTTTATGTGGGTTTTTTCGCGCATCGACTTTGGGC  
GCACTCACTTTTGTGGTGGCTTCTGCTCTCGGAGTATCCCAAGGACTACCCACTCTTCTCGTCACTACTGTCCCTT  
GTTTTTGTACTGCTGTTTCGTGTTTCGGCATCATCGGCGATTTCTTGGGCGGCGCCACCTTCAATCCCACTGCAATC  
GCTGCTTTCTATGCCGCTGGTATTGGAGGCGCCGATTCTCTCTTCTCTGCTGCCCTCCGCTTTCCTGCCAGGCG  
GCTGGTGCAGTAGGTGGTGTCTTGTCAATTATGGAGGTTATGCCAATGCAGTACAAACACATGCTTGGGGGTCCCT  
TCATTGAAGGTTGACCTGCACACTGGAGCTATTGCTGAGGGCGTTTTGACTTTCACAATTACCTTTGCTGTCCCTT  
CTCATAGTCCTTAGGGGTCCAAGCAACCCACTAGTGAAGAATTGGTTGCTTGCCATGGCAACTGTTTCGGCAGTC  
GTTGCCGGTTCAAGTTATACTGGACCTTCGATGAATCCTGCCAATGTAAGTGACATATCTCTTTTCCATTCTATC  
GCTAGATT**C****TGA**

>Oeu050293.1

MGAIKAAVADGVLTFMWVFCASLTGALTFVVASALGVSQGLPTLLVTVLVFVLLFVFGIIGDFLGGATFNPTAI  
AAFYAAGIGGADSLFSAALRFPAQAAGAVGGALAIMVMPMQYKHM LGGPSLKVLDLHTGAIAEGVLTFTTITFAVL  
LIVLRGPSNPLVKNWLLAMATVSAVVAGSSYTGPSMNPANVSDISLFHSIARF\*
