# Supplementary material for: Genome Wild Analysis and Molecular Understanding of the Aquaporin Diversity in Olive Trees (Olea Europaea L.)
Source: MDPI journal article supplement (doi:10.3390/ijms21114183), 2020-06-11
Supplement: s1 [file s1]

**Figure S2** Detailed *Oleu*AQP sequences (genomic, CDS and protein sequences) from the domesticated olive species *Olea europaea* cv. Picual.

Sequences are presented in their original version, and if need be, in their corrected versions. Only the “corrected” sequences were used for analysis.

For the genomic sequences, the introns are in blue.

Codons “Stop” and “Start” are in red.

All sequences are classified according to their subfamily.

### ***Oleu*PIP1;1 *Oleu*061Scf2846g07022.1**

>*Oleu*061Scf2846:701124..702805 (- strand) class=gene length=1682

#### **>*Oleu*PIP1;1\_*Oleu*061Scf2846 Original version**

ATGGAGAGCAAGGAGGAGGATGTACGAGTGGGAGCCAACAAATTCGCCGAGAGGCAGCCGATTGGCACGGCTGCT  
CAAAGCCAGGACAAGGACTACAAGGAACCACCACCGCGCCACTTTTCGAGCCGGGTGAGCTGTCCCTCGTGGTCTG  
TTCTACAGAGCTGGCATAGCAGAGTTCATAGCCACTTTCTTGTTCCCTTTATATTACAGTTTTGACAGTGATGGGA  
GTTAGTAAGTCTGATTCCAAGTGCAAACTGTTGGAATCCAAGGTATTGCTTGGGCATTGGTGGCATGATCTTT  
GCCCTTGTTTACTGCACTGCAGGAATTTAGGCAAGTCTTTTCTATATATATAATTTGCAAATTTGCTTGAT  
TTGCTATGATCTTCAACAGTAACGATCCGTCTTAAAGCTCAAAGAGGGAGTCGTCAGATTTGAAGATTGGTTTGT  
GGGGTAGATATGAAAATACTAACAACATATATATTGGATTATGGTCTCTGTCTCTGCAGTTAGTCTTTGATAG  
TATATGGAATTTAGGTTTTGCCATTAAAATTAGAAATTACCTAATTCAAAATTGAGTTGATTTTTCATGAATTC  
AGTTATAAGGTTTTAATTCATTTGATATTAACATGGCAATTCAGAAAACCAAATCGTTTCAGCAATCAAATTTA  
TGATGAACAATTTTAACAGTACTACTAACCTATTTTCTTCAAAGAAAAGGGCAAAATTTTAATGAACTGCTTGTT  
TTGCAGGGGGGCATATAAATCCGGCAGTGACTTTTCGGGCTGTTTTTGGGGAGGAAATTGTCTGTTGACCCGGGCTG  
TGTTCTACATGGTGATGCAGTGTCTTGGAGCCATATGTGGTGCTGGTGTGGTTAAGGGATTTCGAAAGACCCGTG  
ACATGACCAAGGGTGGTGGTGTCTAATGTAGTAGCCCACGGTTACACCAAGGGCGATGGCCTAGGTGCTGAAATAA  
TCGGAATTTTTGTGCTCGTTTACACTGTCTTCTCTGCTACTGATGCCAAACGTAGCGCCAGAGACTCGCACGTTCT  
CTGTAAGCACTCCTCTTGCTTTTGTGATTGAGCTTGAACAAGAATTTGCTTGTTGATCTGTAATCAAATTTGCT  
TTTTCGTTTTGTAAGAACTGATGAATCAAAAAATGTCATTGTTTATCAAGAAAACGTTTGATTAATTTGGATTCCAT  
ATGCTGTAATTCATGGTTTTTCAGATATTGGCCCCCTTGCTTATTGGGTTTGCTGTGTTCTTGGTGCACCTTGGA  
ACCATCCCTATTACCGGTACAGGTATTAACCCCGCCAGGAGTCTTGGTGCAGCAATCATCTACAACAAAGACAAG  
GCATGGGATGATCACGTAAGCTAAAAATTCAACTGTCTGAATTCAACTATTGAAATATTTGAGTTAAGGGCATA  
CTAGACAATTATATCCTAACAATTTTTTACGTTGTTCACTTATCACAATCCTCCTTTTATCTATTTTGGGACTAC  
GACGAAATTTTTTAATAATCTGGCAGATGAGATGATATGATTGTCTAAAGTTTGTCTCACTCTCATCTTGCTCT  
GATATGATAATATGCAGTGGATATTCTGGGTTGGACCGTTCATTGGGGCAGCACTTGCAGCTCTATACCATGTGG  
TGGTGATCCGAGCCATCCCATTCAAAAATAA

#### **>*Oleu*PIP1;1 corrected**

ATGGAGAGCAAGGAGGAGGATGTACGAGTGGGAGCCAACAAATTCGCCGAGAGGCAGCCGATTGGCACGGCTGCT  
CAAAGCCAGGACAAGGACTACAAGGAACCACCACCGCGCCACTTTTCGAGCCGGGTGAGCTGTCCCTCGTGGTCTG  
TTCTACAGAGCTGGCATAGCAGAGTTCATAGCCACTTTCTTGTTCCCTTTATATTACAGTTTTGACAGTGATGGGA  
GTTAGTAAGTCTGATTCCAAGTGCAAACTGTTGGAATCCAAGGTATTGCTTGGGCATTGGTGGCATGATCTTT  
GCCCTTGTTTACTGCACTGCAGGAATTTAGGCAAGTCTTTTCTATATATATAATTTGCAAATTTGCTTGAT  
TTGCTATGATCTTCAACAGTAACGATCCGTCTTAAAGCTCAAAGAGGGAGTCGTCAGATTTGAAGATTGGTTTGT  
GGGGTAGATATGAAAATACTAACAACATATATATTGGATTATGGTCTCTGTCTCTGCAGTTAGTCTTTGATAG  
TATATGGAATTTAGGTTTTGCCATTAAAATTAGAAATTACCTAATTCAAAATTGAGTTGATTTTTCATGAATTC  
AGTTATAAGGTTTTAATTCATTTGATATTAACATGGCAATTCAGAAAACCAAATCGTTTCAGCAATCAAATTTA  
TGATGAACAATTTTAACAGTACTACTAACCTATTTTCTTCAAAGAAAAGGGCAAAATTTTAATGAACTGCTTGTT  
TTGCAGGGGGGCATATAAATCCGGCAGTGACTTTTCGGGCTGTTTTTGGGGAGGAAATTGTCTGTTGACCCGGGCTG  
TGTTCTACATGGTGATGCAGTGTCTTGGAGCCATATGTGGTGCTGGTGTGGTTAAGGGATTTCGAAAGACCCGTG  
ACATGACCAAGGGTGGTGGTGTCTAATGTAGTAGCCCACGGTTACACCAAGGGCGATGGCCTAGGTGCTGAAATAA  
TCGGAATTTTTGTGCTCGTTTACACTGTCTTCTCTGCTACTGATGCCAAACGTAGCGCCAGAGACTCGCACGTTCT  
CTGTAAGCACTCCTCTTGCTTTTGTGATTGAGCTTGAACAAGAATTTGCTTGTTGATCTGTAATCAAATTTGCT  
TTTTCGTTTTGTAAGAACTGATGAATCAAAAAATGTCATTGTTTATCAAGAAAACGTTTGATTAATTTGGATTCCAT  
ATGCTGTAATTCATGGTTTTTCAGATATTGGCCCCCTTGCTTATTGGGTTTGCTGTGTTCTTGGTGCACCTTGGA  
ACCATCCCTATTACCGGTACAGGTATTAACCCCGCCAGGAGTCTTGGTGCAGCAATCATCTACAACAAAGACAAG  
GCATGGGATGATCACGTAAGCTAAAAATTCAACTGTCTGAATTCAACTATTGAAATATTTGAGTTAAGGGCATA  
CTAGACAATTATATCCTAACAATTTTTTACGTTGTTCACTTATCACAATCCTCCTTTTATCTATTTTGGGACTAC  
GACGAAATTTTTTAATAATCTGGCAGATGAGATGATATGATTGTCTAAAGTTTGTCTCACTCTCATCTTGCTCT

GATATGATAATATGCAGTGGATATTCTGGGTTGGACCGTTCATTGGGGCAGCACTTGCAGCTCTATACCATGTGG  
TGGTGATCCGAGCCATCCCATTCAAAAA**TAA**

>*OleurPIP1*;1

**ATG**GAGAGCAAGGAGGAGGATGTACGAGTGGGAGCCAACAAATTCGCCGAGAGGCAGCCGATTGGCACGGCTGCT  
CAAAGCCAGGACAAGGACTACAAGGAACCACCACCGGCCCACTTTTCGAGCCGGGTGAGCTGTCTCTGTTGCTCG  
TTCTACAGAGCTGGCATAGCAGAGTTCATAGCCACTTTCTTGTTCCTTTATATTACAGTTTGGACAGTGATGGGA  
GTTAGTAAGTCTGATTCCAAGTGCAAACTGTTGGAATCCAAGGTATTGCTTGGGCATTTGGTGGCATGATCTTT  
GCCCTTGTTTACTGCACTGCAGGAATTTAGGGGGGCATATAAATCCGGCAGTGACTTTCGGGCTGTTTTGGGG  
AGGAAATTGTCGTTGACCCGGGCTGTGTTCTACATGGTGATGCAGTGCTTGGAGCCATATGTGGTGCTGGTGTG  
GTTAAGGGATTTCGAAAGACCCTGTACATGACCAAGGGTGGTGGTGAATGTAGTAGCCACGGTTACACCAAG  
GGCGATGGCCTAGGTGCTGAAATAATCGGAATTTTGTGCTCGTTTACACTGTCTTCTCTGCTACTGATGCCAAA  
CGTAGCGCCAGAGACTCGCACGTTCTATATTGGCCCCCTTGCTATTGGGTTTGTGTGTTCTTGGTGCACCTG  
GCAACCATCCCTATTACCGGTACAGGTATTAACCCCGCCAGGAGTCTTGGTGCAGCAATCATCTACAACAAAGAC  
AAGGCATGGGATGATCACTGGATATTCTGGGTTGGACCGTTCATTGGGGCAGCACTTGCAGCTCTATACCATGTG  
GTGGTGATCCGAGCCATCCCATTCAAAAA**TAA**

>*OleurPIP1*;1

MESKEEDVRVGANKFAERQPIGTAAQSQDKDYKEPPAPLFEPEGELSSWSFYRAGIAEFIATFLFLYITVLTVMG  
VSKSDSKCKTVGIQGIAWAFGGMIFALVYCTAGISGGHINPAVTFGLFLGRKLSLTRAUFYFVVMQCLGAICGAGV  
VKGFGLTLYMTKGGGANVVAHGYYTKGDGLGAEIIGTFVLVYTVFSATDAKRSARDSHVPILAPLPIGFAVFLVHL  
ATIPITGTGINPARSLGAIIYNKDKAWDDHWIFWVGPFIGAALAALYHVVVIRAIIPFKK\*

## *OleurPIP1*;2a *Oleur061Scf0176g00018.1*

>*Oleur061Scf0176*:63114..64769 (+ strand) class=gene length=1656

>*OleurPIP1*;2a

**ATG**GAGAGCAAAGAGGAAGATGTACGAGTGGGAGCCAACAAATTC AACGAGAGGCAGCCGATTGGCACGGCGGCCG  
CAATCCCAAGACAAGGACTACAAGGAGCCACCACCGGCCCGCTTTTCGAGCCCCGGCGAGCTGTCTCATGGTCCG  
TTCTACAGAGCTGGCATTGCCGAGTTCATAGCCACATTCCTGTTCTCTGTATATTACAATTTTGGACAGTGATGGGA  
GTTAGCAAGTCTGATTCTAAGTGCTCTACTGTTGGAATCCAAGGTATTGCTTGGGCATTCGGTGGCATGATCTTT  
GCCCTTGTTTACTGCACCGCTGGAATTTAGGCAAGTTCCTTACCTATAAATGGTTCGCATATTTGGCTTCTATA  
TACCTTGATCTTTAACCTTAATATCTCATACGAGTAATCGATCTGTCTAAACTCTAAATAGAGTTAGATTTCA  
GGATTGGCGCTTTCAGTTGGGTTGCTCCGCTCTGATGATGAGGTTGAAGTTTAACATGGAATCGTCTGTGCTCTCT  
GTAGTTAGTCTTTGATAGTAGCTTTGGGAATCAAATAAGAAATTACCTAATTCAAATAGAGTTGATTTTATAT  
TAATTTCTGTTCTGAATAACAATTATAACAATATTAACCTATTTTCTTCAAAGAAAATGGCATAATTATTACTGG  
AAAAGAAAGCAAGTTGTATGACCAGTAACCTATTGACGAGTTGTTTGTGTGCAGGGGGGCATATAAACC CGCA  
GTGACATTTGGGCTGTTTTTGGCCAGGAAATTGTCATTGACTCGGGCTATATTCTACATGGTGATGCAGTGCCTA  
GGAGCCATATGTGGTGCTGGTGTGGTTAAGGGGTTTCGAAAGACCCTGTACATGTCCAAGGGTGGTGGTGAAT  
GTTGTAGCTCACGGTTACACCAAGGGTAGTGGCCTAGGTGCTGAAATTATAGGTACCTTCGTTCTCGTTTACACC  
GTTTTCTCTGCTACTGATGCCAACGTAGCGCCAGAGACTCTCACGTTCCA**GTAAGCACTCCTCTTTCTTTTTT**  
**GGCTAGTTTCTCTTGAAATTTTTTCATTTGTACAGTTGTAGATATTGATCAATCAAAGCACAAACATTATTGACTC**  
**AAAAAGTTTGATTAATTGGACTCCCTAATTCTGTAATTCTATGGTTTTAGATATTAGCCCCCTTGCTATTGG**  
**GTTTGCCGTGTTCTTGGTGCCTTGGCGACCATCCCTATTACAGGTACTGGTATTAACCCCGCCAGGAGTCTTGG**  
**TGCAGCAATCATCTACAACAAAGACAAGGCATGGGATGATCAC**GTAAGCTAAATTC**AACTGTATCTGAATTCAG**

**TATAATCAGGATTTACTATTGAAATATTCGAGTTAAGGACTCACTCAGACAATTATATCCTAACTTACACTACA**

**AGTCGTGTTAAATTTGGCGTGTATAAAGGTGAATGGTAAATGTGACATATTTTACGTTGTTAACTTACCACAAC**

**CCTCCTATTTTAGGATGATAAGGTTGGATAAAGTTAGTTATCTTTTTTCTTGATAATGTGCAGTGGATATTCTGG**

**GTTGGACCATTCAATTGGGGCAGCACTTGCAGCTCTCTACCATGTGGTTGTGATAAGAGCCATCCCATTCAGAAT**

**AAG**TGA****

>*OleurPIP1*;2a

**ATG**GAGAGCAAAGAGGAAGATGTACGAGTGGGAGCCAACAAATTC AACGAGAGGCAGCCGATTGGCACGGCGGCCG  
CAATCCCAAGACAAGGACTACAAGGAGCCACCACCGGCCCGCTTTTCGAGCCCCGGCGAGCTGTCTCATGGTCCG  
TTCTACAGAGCTGGCATTGCCGAGTTCATAGCCACATTCCTGTTCTCTGTATATTACAATTTTGGACAGTGATGGGA  
GTTAGCAAGTCTGATTCTAAGTGCTCTACTGTTGGAATCCAAGGTATTGCTTGGGCATTCGGTGGCATGATCTTT  
GCCCTTGTTTACTGCACCGCTGGAATTTAGGGGGGCATATAAACC CGCAGTGACATTTGGGCTGTTTTGGCC  
AGGAAATTGTCATTGACTCGGGCTATATTCTACATGGTGATGCAGTGCCTAGGAGCCATATGTGGTGCTGGTGTG  
GTTAAGGGGTTTCGAAAGACCCTGTACATGTCCAAGGGTGGTGGTGAATGTGTAGCTACCGGTTACACCAAG  
GGTAGTGGCCTAGGTGCTGAAATTATAGGTACCTTCGTTCTCGTTTACACCGTTTTCTCTGCTACTGATGCCAAA  
CGTAGCGCCAGAGACTCTCACGTTCCAATATTAGCCCCCTTGCTATTGGGTTTGGCGTGTCTTGGTGCACCTG  
GCGACCATCCCTATTACAGGTACTGGTATTAACCCCGCCAGGAGTCTTGGTGCAGCAATCATCTACAACAAAGAC  
AAGGCATGGGATGATCACTGGATATTCTGGGTTGGACCATTCAATTGGGGCAGCACTTGCAGCTCTCTACCATGTG  
GTTGTGATAAGAGCCATCCCATTCAGAATAAG**TGA**

**>OleurPIP1;2a**

MESKEEDVRVGANKFNERQPIGTAAQSQDKDYKEPPAPLFEPEGELSSWSFYRAGIAEFIATFLFLYITILTVMG  
VSKSDSKCSTVGIQGIAWAFGGMIFALVYCTAGISGGHINPAVTFGLFLARKLSLTRAIFYMVMQCLGAICGAGV  
VKGFGLTLYMSKGGGANVVAHGYYTKGSLGAEIIGTFVLVYTVFSATDAKRSARDSHVPILAPLPIGFAVFLVHL  
ATIPITGTGINPARSLGAIIYNKDKAWDDHWIFWVGPFIGAALAALYHVVVIRAI PFKNK\*

**OleurPIP1;2b Oleur061Scf0994g03003.1**

>Oleur061Scf0994 :369686..371341 (+ strand) class=gene length=1656

**>OleurPIP1;2b**

**ATG**GAGAGCAAAGAGGAAGATGTACGAGTGGGAGCCAACAAATTCAACGAGAGGCAGCCGATTGGCACGGCGGCG  
CAATCCCAAGACAAGGACTACAAGGAGCCACCACCGGCACCGCTTTTCGAGCCCCGGTGAGCTGTCCCTCATGGTCCG  
TTCTACAGAGCTGGCATTGCCGAGTTCATAGCCACATTCCTGTTCTGTATATTACAATTTTGACAGTGATGGGA  
GTTAGCAAGTCTGATTCTAAGTGCTCTACTGTTGGAATCCAAGGTATTGCTTGGGCATTCCGTGGCATGATCTTT  
GCCCTTGTTTACTGCACCGCTGGAATTT**CAG****CAAGTTCTTTACCTATAAAATGGTTCGCATATTTGGCTTCTATA**  
**TACCTTGATCTTTAACCTTAATATCTCATACGAGTAATCGATCTGTCTAAAACTCTAAATTTAGATTAGATTCA**  
**GGATTGGCGTTCTCAGTTGGGTTGCTCCGTCTTGATGATGAGGTTGAAGTTTAACATGGAATCGTCTGTGTCTCT**  
**GTAGTTAGTCTTTGATAGTAGCTTTGGGAATCAAAATAAGAAATTACCTAATTCAAAATTTAGATTGATTTTATAT**  
**TAATTTCTGTTCTGATGAACAATTATAACAATATTAACCTAGTTTCTTCAAAGAAAATGGTATAATTATTACTGG**  
**AAAAGAAAGCAAGTTGTATGACCAGTAACCTATTGACGAGCTGTTTGCTGTGCAG**GGGGGCATATAAAACCGGCA  
GTGACATTTGGGCTGTTTTTGGCCAGGAAATTGTCAATTGACTCGGGCTATATTCTACATGGTGATGCAGTGCTTA  
GGAGCCATATGTGGTGCTGGTGTGGTTAAGGGGTT**CGGAAAGACCCGTACATGTCCAAGGGTGGTGGTGCTAAT**  
**GTTGTAGCTCACGGTTACACCAAGGGTAGTGGCCTAGGTGCTGAAATTATAGGTACCTTCGTTCTCGTTTACACC**  
**GTTTTCTCTGCTACTGATGCCAAACGTAGCGCCAGAGACTCTCACGTTCTCTGTAAGCACTCCTCTTTTATTTTTC**  
**GGCGCGTTTCTCTTGAAATTTTTTCATTTGTACATGTTGTAGATATTGATCAATCAAAACACAACATTATTGACAC**  
**AAAAAGTTTGATTAATTGGAATCCCTAATTCTGTAATTCTATGGTTTTTCAG**ATATTAGCCCCCTTGCCATTGG  
GTTTGCCGTGTTCTTGGTGCACTTGGCGACCATCCCTATTACAGGTACTGGTATTAACCCCGCCAGGAGTCTTGG  
TGCAGCAATCATCTACAACAAAGACAAGGCATGGGATGATCAC**GTAAGCTAAATTCAACTGTATCTGAATTCAG**  
**TATAATCAGGATTCTACTATTGAATTATTCGAGTTAAGGACTCACTCAGACAATTATATCCTAACTTACACTACA**  
**AGTCGTGTTAAATTTGGCGTGTATAAGGTGAATGGTAAATGTGACATATTTTTTACGTTGTTAACTTACCACCAC**  
**CCTCCTATTTTGGGATGATAAGGTTGGATAAAGTTAGTTATCTTTTTTCTGATAATATGCAG**TGGATATTCTGG  
GTTGGACCATTCAATTGGGGCAGCACTTGCAGCTCTCTACCATGTGGTGGTGATAAGAGCCATCCCATTCAGAAT  
AAG**TGA**

**>OleurPIP1;2b**

**ATG**GAGAGCAAAGAGGAAGATGTACGAGTGGGAGCCAACAAATTCAACGAGAGGCAGCCGATTGGCACGGCGGCG  
CAATCCCAAGACAAGGACTACAAGGAGCCACCACCGGCACCGCTTTTCGAGCCCCGGTGAGCTGTCCCTCATGGTCCG  
TTCTACAGAGCTGGCATTGCCGAGTTCATAGCCACATTCCTGTTCTGTATATTACAATTTTGACAGTGATGGGA  
GTTAGCAAGTCTGATTCTAAGTGCTCTACTGTTGGAATCCAAGGTATTGCTTGGGCATTCCGTGGCATGATCTTT  
GCCCTTGTTTACTGCACCGCTGGAATTT**CAGGGGGGCATATAAAACCGGCAGTGACATTTGGGCTGTTTTTGGCC**  
**AGGAAATTGTCAATTGACTCGGGCTATATTCTACATGGTGATGCAGTGCTTAGGAGCCATATGTGGTGCTGGTGTG**  
**GTTAAGGGGTTTCGGAAAGACCCGTACATGTCCAAGGGTGGTGGTGCTAATGTTGTAGCTCACGGTTACACCAAG**  
**GGTAGTGGCCTAGGTGCTGAAATTATAGGTACCTTCGTTCTCGTTTACACCGTTTTCTCTGCTACTGATGCCAAA**  
**CGTAGCGCCAGAGACTCTCACGTTCTATATTAGCCCCCTTGCCATTGGGTTTGCCGTGTTCTTGGTGCACTTG**  
**GCGACCATCCCTATTACAGGTACTGGTATTAACCCCGCCAGGAGTCTTGGTGACGAATCATCTACAACAAAGAC**  
**AAGGCATGGGATGATCACTGGATATTCTGGGTTGGACCATTCATTGGGGCAGCACTTGCAGCTCTCTACCATGTG**  
**TCGTGATAAGAGCCATCCCATTCAGAATAAG****TGA**

**>OleurPIP1;2b**

MESKEEDVRVGANKFNERQPIGTAAQSQDKDYKEPPAPLFEPEGELSSWSFYRAGIAEFIATFLFLYITILTVMG  
VSKSDSKCSTVGIQGIAWAFGGMIFALVYCTAGISGGHINPAVTFGLFLARKLSLTRAIFYMVMQCLGAICGAGV  
VKGFGLTLYMSKGGGANVVAHGYYTKGSLGAEIIGTFVLVYTVFSATDAKRSARDSHVPILAPLPIGFAVFLVHL  
ATIPITGTGINPARSLGAIIYNKDKAWDDHWIFWVGPFIGAALAALYHVVVIRAI PFKNK\*

**OleurPIP1;3a Oleur061Scf1119g10041.1**

>Oleur061Scf1119:1019235..1022315 (- strand) class=gene length=3081

**>OleurPIP1;3a**

**ATGG**CAGAAAGCAAGGAAGAAGATGTTAAACTTGGAGCCAACAAGTTCACAGAGAAGCAACCATTAGGCACAGCG  
GCTCAAACAGACAAGGACTATAAAGGAGCCACCACCAGCACCTTTATTTGAGCCTGGAGAATTGACATCATGGTCC  
TTTTACAGGGCTGGAATTGCAGAATTCATAGCCACTTTCTTGTTCCTGTACATATCTATTTTGACTGTTATGGGT  
GTTTTCAGTGCAAAGAACAAGTGTGCCTCTGTGGGCGTCCAGGGAATTGCTTGGGCCTTTGGGGGTATGATCTTT  
GCACTTGTCTACTGTACTGCTGGTATCTCAG**GT**CAGTCCCTAAAACCCCTTTCTATCTTTACTTTTAATTTACC  
CTTTTTTTTTTTTCAAATTGCTTAATTTTTCTTTTTCTTTTTTATTTTTGGACTTCTCTCTGTATATCTTTTTTT  
TTAGTCCTTCTTTTTACGATCTTTGACTCAAAAAGTTCCTCAATCGGTTTGTGGGTCTTTAGAGATTCTTGAGG  
AAATTTATTCAGTTGAGTAGTAGTGAATTTGTGTGGTTCCTTCTTTGTATTGGAAAATTTGTGGCTTTTTATTGT  
TCTGTTTATCTGTATAAGTGCTTAGTTTAACCACGGGCTAGCTACATAGATGATATTTGGAACATAAAGATTGTAT  
CTTTGTGATTTTTTGAATTTTTTTGACTTTTTTTCAGTGTAAGCTGTTTGGCTAAGCTTAAAATGTTTGCTTATA  
AGCAAATAAGTATTAATAATAATTACTAGCTTAGTAAGGTAAAGTGTATTAGGTATATACACTAACGTTTTCTTC  
TACTTTGATGGTAAGGTAAAAATTGTTATGACCATGTTAACAAGGTTGATCTTATTAAGAGGAATGACTCGATAT  
CTATCTAAGTTGGTCAATATTTTCGATATTTAATCAATACGTGATTTATTCTCTTAACATGCTCCCGCAAAATAAT  
GGCTCTTTTTTAGCAGACCAATTTTGAAATTCGTGTTCTTATTTTTGAGACTTAATCGGATCGAATAGCTCGTTG  
GAGTTACTGGGCTCTGATATCGTGTTAACAACCTTACTAGGAGTGGCCCAAAATCTATTTAAGTTGGTCAATATT  
TCGGTATTTAACCGACGTGTGATTTATTCCTTAAACAAAATTTGTCAAAATATGTAAAAAATTTATTTTTATAG  
CTTAGCTAGACATAAGTGAGGGAAGTAAGATATTGAAACATTTTTGAAACGGAAATTTACTTATGAGCAACTT  
TTAAACTACTTTTGATGAAGCATATTTAAATTTTTCTTGTTCATGTTAAACAGGAGGGCACATCAACCCAGCT  
GTGACATTTGGCTTGTCTTGGCAAGGAACTTTCTTTGATCAGGGCTTTATTTTACATGGTGATGCAGTGCCTG  
GGTGCCATTGCTGGTGTGTTGTTAAGGGGTCATGAAGGGTCAATACGAGAGACTTCAAGGCGGTGCTAAC  
ATTGTGCAGCATGGCTACACCAAGGCGATGCCCTTGGTGCGGAGATAGTTGGCACCTTTATTCTCGTCTACACT  
GTCTTCTCGGCTACTGATGCCAAGAGAAATGCTAGAGACTCACACGTCCCG**GT**ATGATTACCCATTCTTCGCTAA  
TTACTTCGACTAACATCACTATTATTGACTAACATCACTATTATTGCTCGCTTAAAATTAATTAATTAATTAAT  
AATTTATTATTATTATTTTTTTTTTTTTTTTTTTTTTTTAAATTATTATTATTATTTTTTTATGAAATTGCTGCA  
AAAGCTTAAGTTGAGAGGGCATATTGACTGATTTAAATTTAGAAGGCTGGTATATGCATGATTTTTGCGAAGGCT  
TGGCGATGAGACTTGAACCTATACCCCTGCAATTTAACATTGAGTGTTTTGACAAATTTCAATTATTTAG**TG**CGTT  
GTGGTTGCTAGGGGATCTATTATTGGTATGATGAATGTGCCAAAACTTTTCGAAAATATAAGATAATACCGAAG  
CTGATCCTGTGAAATTTCTTGATTTTTAAACTTGGGATTTCAATTATAAAATGTCAATCTTGTTAAGAAGAATAGT  
CAAGCCCTTAACGTGCTCATTTTTTGGAGTCTTAATTGGATCAAATGGCTCGTTGGAGCTTAATAGGTTTATACCA  
TATTAAAACTTGGGATTTCACTTTTAAAGGTTTATCTTGTTAAGAGATGCAGTTCTAACCATTTATGACGTCCATG  
TTTTATGTGGAATTTTATCCCTTGACATACTGGTCTTAAATATGCTTCTCGTGATTGTGCAGCTTTTGGCTCCA  
CTCCCCATTGGATTTGCAGTATTTTTGGTTCATTTGGCCACCATCCCCATTACTGGAACAGGTATCAACCCCTGCT  
AGGAGTCTCGGAGCTGCCATAATTTACAATAGAGACCACGCATGGGACGACCAG**GT**AAGATTCTTGCTATACATT  
ACATATAACACCTGTATCTATTCCAATGTTTTTTCTTGACTAAATTACGCGATTTCTTTATTTACAGTGGATCTT  
CTGGGTTGGTCCCTTCATTGGAGCTGCTCTTGCTGCAATTTACCACCAGATTGTCATCAGAGCCATTCTTTCAA  
GAGCAGGGCT**TAA**

>*OleurPIP1;3a*

**ATGG**CAGAAAGCAAGGAAGAAGATGTTAAACTTGGAGCCAACAAGTTCACAGAGAAGCAACCATTAGGCACAGCG  
GCTCAAACAGACAAGGACTATAAAGGAGCCACCACCAGCACCTTTATTTGAGCCTGGAGAATTGACATCATGGTCC  
TTTTACAGGGCTGGAATTGCAGAATTCATAGCCACTTTCTTGTTCCTGTACATATCTATTTTGACTGTTATGGGT  
GTTTTCAGTGCAAAGAACAAGTGTGCCTCTGTGGGCGTCCAGGGAATTGCTTGGGCCTTTGGGGGTATGATCTTT  
GCACTTGTCTACTGTACTGCTGGTATCTCAGGAGGGCACATCAACCCAGCTGTGACATTTGGCTTGTCTTGGCA  
AGGAAACTTTCTTGTATCAGGGCTTTATTTTACATGGTGATGCAGTGCCTGGGTGCCATATGTGGTGCTGGTGT  
GTTAAGGGGTTTCAATGAAGGTCATACGAGAGACTTCAAGGCGGTGCTAACATTGTGCAGCATGGCTACACCAA  
GGCGATGCCCTTGGTGCGGAGATAGTTGGCACCTTTATTCTCGTCTACACTGTCTTCTCGGCTACTGATGCCAAG  
AGAAATGCTAGAGACTCACACGTCCCGTGCGTTGTGGTTGCTAGGGGATCTATTATTGTATTTTTGGTTCATTTG  
GCCACCATCCCCATTACTGGAACAGGTATCAACCCTGCTAGGAGTCTCGGAGCTGCCATAATTTACAATAGAGAC  
CACGCATGGGACGACCAGTGGATCTTCTGGGTTGGTCCCTTCATTGGAGCTGCTCTTGCTGCAATTTACCACCAG  
ATTGTCATCAGAGCCATTCTTTCAAGAGCAGGGCT**TAA**

>*OleurPIP1;3a*

MAESKEEDVKLGANKFTEKQPLGTAAQTDKDYKEPPAPLFEPPGELTSWSFYRAGIAEFIATFLFLYISILTVMG  
VFSANKKASVGVQGIAWAFGGMIFALVYCTAGISGGHINPAVTFGLFLARKLSLIRALFYMVQMQLGAICGAGV  
VKGFMMKQYERLQGGANIVQHGYTKGDALGAEIVGTFILVYTVFSATDAKRNARDSHVPCVVVARGSIIVFLVHL  
ATIPITGTGINPARSLGAALIIYNRDHAWDDQWIFVWGPFIGAALAAIYHQIVIRAIPFKSRA\*

## *OleurPIP1;3b* *Oleur061Scf3031g04003.1*

>*Oleur061Scf3031*:499618..502336 (+ strand) class=gene length=2719

>*OleurPIP1;3b*

**ATGG**CAGAAAGCAAGGAAGAAGATGTTAAACTCGGAGCCAACAAGTTCACAGAGAGGCAGCCATTAGGCACAGCG  
GCTCAAACAGACAAGGACTATAAAGGAGCCACCACCAGCACCTTTATTTGAGCCTGGAGAATTGACATCATGGTCC

TTTTACAGGGCTGGAATTGCAGAATTCATAGCCACTTCTCTGTTCTTGTACATATCTATTTTGGACTGTTATGGGT  
GTTTTAAGTGCAAAGAATAAGTGTGCCTCTGTGGGCGTCCAGGGAATTGCTTGGGCCTTTGGGGGTATGATCTTT  
GCACTTGTCTATTGTACTGCTGGTATCTCAGGTCAGTCTCTAAACCCCCCTTCTCTCTTTACTTTTAAAGTAACC  
TTTTTTTTTTTTTAAAATTTCAAATTACTTAATTTTTCTTTTTCTTTTTTATTTTTGGACTTCTCTCTGTATAT  
CTATCTTTTTTAGTCCTGTTTTTTTTACGATCTTTGACTCAAAAAAGTTCTTCAATCGGTTTGTGGGGTTTAGAGA  
TTTTTGAGGAAATTTATTAGTTGAGTAGTGATTTGTGTGGTTCCTTCTTGTATTGGAAATTTTCGTCGCTTTT  
TATTGTTCTGTTTATCTGTATAAGTGCTTAGTTTAAACCACGGGCTAGTTACATAGATGATATTTGGAACCAAAGA  
TTGTATCTTTGTGATTTCTTGAAATTTTTTTGACTTATTTCCGTGTAAGCTGTTTGGCTAAGCTTAAACTGTTTG  
CTTATAAGCAAATAAGTATTAATAAATACTACTATTTTGATGGTTAACGTTGTATTAGTAGCTTAATAAGCTAACG  
TGTATATATATATGTATATATAAATAACATTTTTCTTCTACTTTGATGGTAAGGTAAAAATTTGTCAAAAATATGT  
AATTTTTTTTTTTTTTAATAGCTTAGCTAGACATAAGTGAGGGAAAAGTAAGATACTGAAACATTTTGAACAAAA  
ATTTACTTATGAGCAACTTTTAACTACTTTGATGAAGCATATTTAAATTTTTCTTGTTTGCATGTTAAACAGG  
AGGGCACATCAACCCAGCTGTGACCTTTGGCTTGTCTTGGCAAGGAACTTTCTTTGATCAGGGCTTTATTTTA  
CATGGTGATGCAGTGCCTGGGTGCCATATGTGGTGCTGGTGTGTTAAGGGGTTTCATGGAGGGTCAATACGAGAG  
ACTTCAAGGCGGTGCTAACATTGTGCAGCATGGCTACACCAAAGGCGATGCCCTTGGTGCGGAGATAGTTGGCAC  
CTTTATTCTCGTCTACACTGTCTTCTCGGCTACTGATGCCAAGAGAAATGCCAGAGACTCACACGTCCCAATATG  
ATTGATTACCCATTCTTCGCTAAATTACTTCCGACTAACATCACCATTATTGCTCGCTTAATATTATTATTATTA  
ATTTTTTTTTTTTTTGAAATTTTCGGCAAAGCTTAAGTTGAGAGGGCGTATTGATTGATTTAAATTTAGAAGACTG  
GTATATGCACAATTTTTGCAAAGGTGTTGCGATGAGACTTGAACCTTATATCCTCCAATTTAACATTGAGTGT  
GACAAATTCGATTATTTAGCGCGTTGTGGTTGCTAGGATCTATTATTAGTATATTTGGAATGTAGGAATGAATGT  
GCCAAAATCTTTTTGAAAATATTTTTCAAAAATCCTTGTACAGTTGTTGGTACCCCTTTTGGAGTAAGGATAATA  
CATACAGGAGCTGATCCTGTGAAATTTCTCGATTTCAAAAATTTGGGATTTCATTTTAAAATGTCAATCTTGTTAA  
GAGAAATAGTCAAGCCCTTTTATGTTAGTTTATGTTTTCATGTGGGATTTTATCCCTTGATGTGCTCATTTTTTCG  
AGTCTTAATCGGATCAAATTGCTCGTCGGAGGTTAACGGGTTCTGATACCGTTTTATGTGGAATTTTATCCAAGA  
CATAGTGGTTCTTAAATATATCTTCGTGATTGTTGCAGCTTTTGGCTCCACTCCCCATTGGATTGTCAGTATTTT  
TGGTTTCAATTTGGCCACCATCCCCATCACTGGAACAGGTATCAACCCTGCTAGGAGTCTCGGAGCTGCTATAATTT  
ACAATAGAGACCACGCATGGGACGACCAGGCAAGATTCTTGCTAT**TAA**

>OleurPIP1;3b

**ATG**GCGAGAAAGCAAGGAAGAAGATGTTAAACTCGGAGCCAACAAGTTCACAGAGAGGCAGCCATTAGGCACAGCG  
GCTCAAACAGACAAGGACTATAAGGAGCCACCACCAGCACCTTTATTTGAGCCTGGAGAATTGACATCATGGTCC  
TTTTACAGGGCTGGAATTGCAGAATTCATAGCCACTTTCTTGTCTTGTACATATCTATTTTGGACTGTTATGGGT  
GTTTTAAGTGCAAAGAATAAGTGTGCCTCTGTGGGCGTCCAGGGAATTGCTTGGGCCTTTGGGGGTATGATCTTT  
GCACTTGTCTATTGTACTGCTGGTATCTCAGGAGGGCACATCAACCCAGCTGTGACCTTTGGCTTGTCTTGGA  
AGGAAACTTTCTTTGATCAGGGCTTTATTTTACATGGTGATGCAGTGCCTGGGTGCCATATGTGGTGCTGGTGT  
GTTAAGGGGTTTCATGGAGGGTCAATACGAGAGACTTCAAGGCGGTGCTAACATTGTGCAGCATGGCTACACCAA  
GGCGATGCCCTTGGTGCGGAGATAGTTGGCACCTTTATTTCTCGTCTACACTGTCTTCTCGGCTACTGATGCCAAG  
AGAAATGCCAGAGACTCACACGTCCCCTTTTGGCTCCACTCCCCATTGGATTGTCAGTATTTTGGTTTCAATTTG  
GCCACCATCCCCATCACTGGAACAGGTATCAACCCTGCTAGGAGTCTCGGAGCTGCTATAATTTACAATAGAGAC  
CACGCATGGGACGACCAGGCAAGATTCTTGCTAT**TAA**

>OleurPIP1;3b

MAESKEEDVKLGANKFTEHQPLGTAAQTDKDYKEPPAPLFEPELTSWSFYRAGIAEFITFLFLYISILTVMG  
VLSAKNKCASVGVQGIAWAFGGMIFALVYCTAGISGGHINPAVTFLGLFLARKLSLIRALFYMVMQCLGAICGAGV  
VKGFMEGQYERLQGGANIVQHGYTKGDALGAEIVGTFILVYTVFSATDAKRNARDSHVPLLAFLPIGFAVFLVHL  
ATIPITGTGINPARSLGAIIYNRDHAWDDQARFLL\*

## OleurPIP1;4a Oleur061Scf0931g02045.1

>Oleur061Scf0931:329811..332344 (- strand) class=gene length=2534

>OleurPIP1;4a

**ATG**GAGGGTAAAGAGGAGGATGTGAGGCTAGGAGCCAACAAGTTCACAGAGAGGCAACCATTGGGTACCTCAGCA  
CAGAGCAAGGACTACAAGGAGCCACCTCCAGCTCCACTTTTTGAGCCTGGTGAACCTCCAGTCATGGTCCCTTTGG  
AGAGCTGGGATTGCTGAGTTTATGGCTACTTTCTTGTCTTTTATATCACAACTTGACTGTAATGGGTGTCAGC  
AGGTCTGGCAGCAAGTGTGCTTCTGTGGGTATTACAGGCATTGCTTGGGCCTTTGGTGGCATGATTTTTGCCCTT  
GTCTACTGCACTGCTGGCATCTCAGGTCCTTCTCTCTCTCTCTCTCTCAATATCTCTGTGTTAGTGTGTTCTA  
TATCTGTTGCTTAAAGTAAATTTTCGAGTCTGTTGTGTTTGGTGTGCAAGATTTTAACTGCTAAACTAATTTTGAG  
TCCTCATTTTCATGGGATCTTGGAATAATATGAAGTATGAAGCTTCTGTTAGTGTCTATATCTGTTCTCAATGA  
AATATAGAGTCTAGTCTGTGTTTAGTATGGAGTATTGGATGGAAGTGAACCTATATAATGAACAAGATTTTATCTT  
CGAACATACCAAGCAATACCACTAGATCTGGGTCCTCATTTTTCATGGGATCTTGGAAATATGTAAATTTATGCAGC  
CTCTGTTTGTGTTTCGGTAATCTGTTGCTTAAAGTAAATCTAGAGTTTTGACTAGTATAATGAGCAAGATTTTATTT  
TCTATATCTAACTAGCCACAAATGTACTAGTTAGGATTTTCTTTCTTTACCCCTTTTTTATTTTTTGGTGGAAAT  
CATTGTTGTTTTTTCAGGTTTTTAAATCTTGAATGTGGTCTTGAATGTGGTTCAAACCTGCTCTCTCTCGAAA

TCTGCACCTTGTGTTAGCAGCTTATTAATTTAATGGGATGTAGGGTTTTGTGCTGACATTTCTTTATTGTGATAC  
TGATTAATGCCCTCGTTTTGAAAATTATTGAACTTTTTTTTATGTACTGATATTGGAATTTTTTATGGGTGATTTCA  
GGTGGACACATAAATCCTGCAGTAACATTTGGTCTGTTCCCTAGCAAGAAAATTGTCTCTAACCAGAGCAATTTTT  
TACATCGTGATGCAATGTCTCGGAGCAATCTGTGGTGTCTGGTGTCTGTAAGGGCTTCCAGCCTTCTTTTTACAAG  
GCTAATGGTGGTGGTGCTAATGTTGTTTCTCATGGTTACACCAAGGGCGATGGACTTGGTGTCTGAGATTATCGGC  
ACTTTTGTCTTGTGTTTACACTGTCTTTTCTGCTACTGATGCCAAGAGAAAATGCCAGAGACTCACATGTCCCTGTA  
AGTATTTCTTTGCAATCTTATTTTTTCTTGCCTGTTTTGTACTTATAGCATTTTGTGTTATTGGTATTATTTCCGC  
TTTCTGAATGATTGCCCTTTCTTACGCACAAGGCATGTGCCTTATCTTTAATGTGTCTGAATGTCTCATGAATTT  
GGTTATACTTTTTCTACTTGAAAAAAGGATTGCAATGCTGGAAGTCCATATAGTCTTGGCATGGTTAGGACTTAGG  
AGCAATATCAATTTCTGCGCACGTCTTTTTTGTGATTACAGGAAGATGGAATTTGAGGTTTTTCCGTAG  
TGTATGATGCTTTACATGATATATTATGGAGCCTTACGATATGCGTAGCCTTTGATTTTTCTTCTAGTACATAGT  
TGGGCTAGAAATCAGTAATTTATGCCAAAACCTGAATCTTAACGTGGGATGCCAAATTGATGACTCCTTGATCT  
TCCAAATTTTACAGATTTTGGCTCCACTCCCAATTGGGTTTGGCGTCTTTTTTGGTTCACTTGGCAACCATCCCCA  
TCACCGGAAGTGGCATCAACCCAGCCAGAAGCCTTGGCGCTGCCATCATTTACAACAAAGATCATGCTTGGGATG  
ATCACGTAAGTTTACTTCATTAACCTTCCACAGACAATCTTCTTACCTGTTTCATGACATTTTTTGGCGTCCATACTT  
AAACATTTTTTGTACAGTGCCTTTCTTACGTGGATCTTCTGGGTGGACCTTTTATTGGAGCTGCCCTTGCTGCAC  
TTTACCATCAGGTTATCATTCGAGCCATCCCATTTAAGAGTAGCAGCTGA

>OleurPIP1;4a

ATGGAGGGTAAAGAGGAGGATGTGAGGCTAGGAGCCAACAAGTTCACAGAGAGGCAACCATTTGGGTACCTCAGCA  
CAGAGCAAGGACTACAAGGAGCCACCTCCAGCTCCACTTTTTGAGCCTGGTGAACCTCCAGTCATGGTCCTTTTGG  
AGAGCTGGGATTGCTGAGTTTATGGCTACTTTCTTGTGTTCTTTATATCACAATCTTGACTGTAATGGGTGTCAGC  
AGGTCTGGCAGCAAGTGTGCTTCTGTGGGTATTACAGGCATTGCTTGGGCCTTTGGTGGCATGATTTTTGCCCTT  
GTCTACTGCACTGCTGGCATCTCAGGTGGACACATAAATCCTGCAGTAACATTTGGTCTGTTCCCTAGCAAGAAAA  
TTGTCTCTAACCAGAGCAATTTTTTACATCGTGATGCAATGTCTCGGAGCAATCTGTGGTGTCTGCTAAAG  
GGCTTCCAGCCTTCTTTTTACAAGGCTAATGGTGGTGGTGCTAATGTTGTTTCTCATGGTTACACCAAGGGCGAT  
GGACTTGGTGTCTGAGATTATCGGCACCTTTTGTCTTGTGTTTACACTGTCTTTTCTGCTACTGATGCCAAGAGAAA  
GCCAGAGACTCACATGTCCCTATTTTTGGCTCCACTCCCAATTGGGTTTGGCGTCTTTTTTGGTTCACTTGGCAACC  
ATCCCCATCACCGGAAGTGGCATCAACCCAGCCAGAAGCCTTGGCGCTGCCATCATTTACAACAAAGATCATGCT  
TGGGATGATCACTGGATCTTCTGGGTGGACCTTTTATTGGAGCTGCCCTTGCTGCACTTTACCATCAGGTTATC  
ATTGAGCCATCCCATTTAAGAGTAGCAGCTGA

>OleurPIP1;4a

MEGKEEDVRLGANKFTERQPLGTSASQSKDYKEPPAPLFEPELQSWSFWRAGIAEFMATFLFLYITILTVMGV  
RSGSKCASVGIQGIWAFGGMIFALVYCTAGISGGHINPAVTFGLFLARKLSLTRAIFYIVMQCLGAICGAGVVK  
GFQPSFYKANGGGANVSHGYTKDGLGAEIIGTFVLVYTVFSATDAKRNARDSHPILAPLPIGFAVFLVHLAT  
IPITGTGINPARSLGAALIIYNKDHAWDHWFVWGPFIGAALAALYHQVIRAIIPFKSSS\*

## OleurPIP1;4b Oleur061Scf0180g12067.1

>Oleur061Scf0180:1186896..1189701 (+ strand) class=gene length=2806

>OleurPIP1;4b

ATGGAGGGTAAAGAGGAGGATGTGAGACTAGGAGCCAACAATTCACAGAGAGGCAACCATTTGGGTACCTCAGCA  
CAGAGCAAGGACTACAAGGAGCCACCTCCAGCTCCACTTTTTGAGCCTGGTGAACCTCCAATCATGGTCCTTTTGG  
AGAGCTGGGATTGCTGAGTTTATGGCTACTTTCTTGTGTTCTTTATATCACAATCTTGACTGTAATGGGTGTCAGC  
AGGTCTGGCAGCAAGTGTGCTTCTGTGGGTATTACAGGCATTGCTTGGGCCTTTGGTGGCATGATTTTTGCCCTT  
GTCTACTGCACTGCTGGCATCTCAGGTTTTCTCTCTCTCAATATCTCTGTGTTAGTGTTCTATATTCTGTTG  
CTTCAGTGAATTTTCAGTCTGTTGTGTTTGGTGAGCAAGATTTTAACTCCTAGACATGCCAAGAATGTACTACTA  
AACTATCTTTAAGTCCTCATTTTCATGGGATCTTGGAATATGAAGCATGAAGCTTCTGTGTTAGTGTTCTATATT  
CTGTTCTCAAGTAAATATAGAGTTTAGTCTGTGTTTAGTATGGAGTATTGGATGGAAGTGAAGTGTATAATGAAC  
AAGATTTTATCTTCGAACATAACAAGCAATACTACTAGATCTGGGTCTCATTTTCATGGGATCTTGGAAGATG  
TAAATTATGCAGCTTCTGTTTGTGTTTCGGTAATCTGTTGCTCAAGTAAATCTAGAGTTTGTACTAGTATAATGAG  
CAAGATTTTATTTTCTATATCTAAGTACCCACAAATGTACTAGTTAAGGATTTTCTTTCTTTCTTTCTTTCTTT  
TTTTTTCTTGGTGGAATTCATTGTTGTTTTTTCAGGTTTTTAAATCTTGAATGTGGTCTTGTAAATGTAGTTCAAA  
CATGCTCTTCTCTTCAAAATCTGCACCGTGTGTTACCAGCTTATTAATTTAATGGGATGTAGGGTTTTGTGCTGA  
CATTTCTTTATTGTGATAATGACTAATGCCCTTGTGTTGAAAATTATTGAACTTTTTTATGTACTGATATTGGAAT  
TTTTATGGATGATTTTCAGGTGGACACATAAATCCTGCAGTAACATTTGGTCTGTTTCTAGCAAGAAAATTGTCT  
CTAACCAGAGCAATTTTTTACATCGTGATGCAATGCTCGGAGCAATCTGTGGTGTCTGCTGCTAAAGGGCTTC  
CAGCCTTCTTTTTTACAAGGCTAATGGTGGTGGTGCTAATGTTGTTTCCCATGGTTACACCAAGGGCGATGGGCTT  
GGTGTCTGAGATTATCGGCACCTTTTGTCTTGTGTTTACACTGTCTTTTCTGCTACTGATGCGAAGAGAAAATGCCAGA  
GACTCACATGTCCCTGTAAGTATTTCTTTGCAATCTTTTTTTTTTCGTCTGTTTGTACTCATAGCATTTTGTGTTA  
TTGGTATTATTTTCGCTTTCTGTATGATTGCCCTTTCTTACACACAAGGCATGTGCCTTATCTGTAATGTGTCTC  
ATGAATTTGATTATACTTTTCTACTTGAAAAAAGGATTGCAATGCTGGAAGTCCATATAGTCTTGGCATGGTTAG

GACTTAGGAGCAATATCAATTTCTGCGCACGTCTTTTTTGTGATTTCAGGAAGATGGAAATGAATTTTCGAGGTTTT  
TTCCGTAAGTGTATGATGCTTTACATGATATATTATGGAGCCTTACGATATGCGTAGCCTTTGATTTTTCTTCTAG  
TACATAGTTGGGCTAGAAATCAGTAATTTATGCTAAAACTTGAATCTTAACGTGGGATGCCAAATTTGATGACTCC  
TTTGATCTTCCAAATTTACAGATTTTGGCTCCACTCCCAATTGGGTTTGCCGTCTTTTTTGGTTCACTTGGCAAC  
CATCCCCATCACCGAACTGGCATCAACCCAGCCAGAAGCCTTGGCGCCGCCATCATTTACAACAAAGATCATGC  
TTGGGATGATCACGTAAGTTTACTTCATTAACCTCCACAGACAATCTTCTTACCTGTTTCATGACATTTTGGCGT  
CCATACTTAAACATTTTGTACATGTGCCTTTCTTCAGTGGATCTTCTGGGTCGGACCTTTCATTGGAGCTGCC  
CTTGCTGCACTTTACCATCAGGTTATCATTCGAGCCGTCCCATTTAAGAGTAGCAGCTGA

>OleurPIP1;4b

ATGGAGGGTAAAGAGGAGGATGTGAGACTAGGAGCCAACAAATTCACAGAGAGGCAACCATTGGGTACCTCAGCA  
CAGAGCAAGGACTACAAGGAGCCACCTCCAGCTCCACTTTTTGAGCCTGGTGAACCTCCAATCATGGTCCTTTTGG  
AGAGCTGGGATTGCTGAGTTTATGGCTACTTTCTTGTCTTTATATCACAATCTTGACTGTAATGGGTGTCAGC  
AGGTCTGGCAGCAAGTGTGCTTCTGTGGGTATTTCAGGGCATTGCTTGGGCCTTTGGTGGCATGATTTTTGCCCTT  
GTCTACTGCACTGCTGGCATCTCAGGTGGACACATAAATCCTGCAGTAACATTTGGTCTGTTTCTAGCAAGAAAA  
TTGTCTCTAACAGAGCAATTTTTTACATCGTGATGCAATGTCTCGGAGCAATCTGTGGTGTGCTGCTGTAAG  
GGCTTCCAGCCTTCTTTTTACAAGGCTAATGGTGGTGGTGTCTAATGTTGTTTCCCATGGTTACACCAAGGGCGAT  
GGGCTTGGTGCTGAGATTATCGGCACCTTTTGTCTTGTTTACACTGTCTTTTCTGCTACTGATGCGAAGAGAAAT  
GCCAGAGACTCACATGTCCCTATTTTGGCTCCACTCCCAATTGGGTTTGCCGTCTTTTGGTTCACCTTGGCAACC  
ATCCCCATCACCGAACTGGCATCAACCCAGCCAGAAGCCTTGGCGCCGCCATCATTTACAACAAAGATCATGCT  
TGGGATGATCACTGGATCTTCTGGGTGCGACCTTTCATTGGAGCTGCCCTTGCTGCACTTTACCATCAGGTTATC  
ATTTCGAGCCGTCCCATTTAAGAGTAGCAGCTGA

>OleurPIP1;4b

MEGKEEDVRLGANKFTERQPLGTSAQSKDYKEPPAPLFEPEGELQSWSFWRAGIAEFMATFLFLYITILTVMGVS  
RSGSKCASVGIQGIAWAFGGMIFALVYCTAGISGGHINPAVTFGLFLARKLSLTRAIFYIVMQCLGAICGAGVVK  
GFQPSFYKANGGGANVVSHTYTKDGLGAEIIGTFVLVYTVFSATDAKRNARDSHVPILAPLPIGFAVFLVHLAT  
IPITGTGINPARSLGAAIINYKDHAWDDHWIFVWGPFIGAALAALYHQVIRAVPFKSSS\*

OleurPIP1;5a Oleur061Scf2999g01010.1

>Oleur061Scf2999:181146..184008 (- strand) class=gene length=2863

>OleurPIP1;5a

ATGGCAGAAAACAGGGAAGAGGATGTTAGGCTTGGAGCCAACAAGTTTACTGAGAAGCAGCCTTTGGGTACAGCT  
GCTCAAACAGACAAGGACTACAAGGAGCCACCTCCAGCCCCTTTGTTTGGCCTGGGGAGATTAAATCATGGTCT  
TTTTACAGGGCTGGTATTGCAGAGTTTGTGGCTACCTTCTTGTCTTGTACATTACCATTTTACTGTCATGGGG  
GTTGGTAGATCAAATAGTAAGTGTGCCTCTGTGGGCATCCAGGGGATTGCTTGGTCCTTTGGTGGCATGATTTTT  
GCACTTGTATACTGCACTGCTGGGATTTTCAGGTTAGTTTATTTTTGTTTTTTAATCTCACTTAATCTGTTTTT  
TCTTTGCATGTTTCTGTTTGTCTTTTACTGTGAGTCTTGGCAAAATTGTGTATTTTCTTTGTTTTATGGGTT  
TCTGGGGTTTTCGTTTTGCCAGATTGATTATGAATTATTGTTACTGGATCTTGTAAATAAGTTTTTAATTGATCC  
ATTTAGATATTATTTGCGATAAAAGCTAGGATCTTGGTGATTTTTTCAGGAACTCCAGTTTTAGATTATATGCT  
ATGGCTTAGGGTACCCGCACCCTAACCCCTCTTAGACCATTGTCTATTATATGTAGCTTCAAACTGATTTCTG  
TATTGGCCGTTGAACAGGAGGACATCAACCCCTGCTGTGACCTTCGGTTTGTCTTGGCAAGGAAGCTTTCCTT  
GACCAGAGCTATCTTCTACATAGTAGTCAGTGCCCTGGTGCAATCTGTGGTGCTGGTGTGTCAAGGGATTCTAT  
GGAGGGTCCATACACAGAGGCTACAAGGTGGGGCCAACGTTGTGCAGCATGGCTACACCAAGGGTGATGGCCTTG  
TGCTGAGATTGTTGGCACTTTTTATTCTTGTTTACACTTCTTCTGCCACTGATGCCAAGAGAAAACGCCAGAGAC  
TCGCATGTTCCAGTAGGTCTTCTTTGTGCGTTATGCACTGATATTAACCTTTTGGTTGCTTAAACTTGTTTGGAA  
AGGCTGGATTTGGTGCCTTGATTTGTTTTTTGTTACTTCTAATTAAGCGTTCATACCCAAGAAAGGAAGAATCGA  
TAATTTTATTATGTTTTGTGTAGCTGGAATGCTACATTTCTCTGATTTTCATTCGCTAATATTGGTTTATATTT  
ATAAACTGTTTAGAAACGCTCAATTCACCTTTATGTCCACACATTTCTAAGGACCCACAACCACAAGTACTGCCCA  
CTCCAACGCGACTCATTTCTACCTATTTATAATTTAAACCATCTTATAAACAACTTTCCAAACATGCTTTTAGAT  
GTTGAGCAATTTTGCTTATTTAGCCTCAGTTCATTCAATGCAATCTTGACATGATATGGGCCAATATCTTTAGTT  
ACTGAAATTCGTTTAGACCAAACTGACCCTATACTGAATGTCATGTATCATAGCACAAAGGTTTGTCTTTCCAA  
AGTATCGCCCCACGCAAAATTTCTGTTTTGCTTTGATGATGCATTTCAGCTTATTTGTTGGTTTATAAATCTATT  
GCCTGTCTGTTAAGCAGGGGTGGAAGATGGGGTTAGGATGATGTGCAGTTTTGATAATTTGATGTGCTTTGGGT  
AATGTGGCTTTTACTGTGCATGGAACCCACAACCTTAAATATTTATTCTCATTCTATCTTTGAGAAGAAAG  
AGTTGTGAAGCAGTTGCATTAAGTGCTTTTATTCTCATCATAGGGAATGTTGGCAGCTCCAATTGGTCTTTTAGC  
ACCATAGGCACATAACACCATCAATTAATTGAGCTATTGATTTGGTTCGAAGTCTCAAATTTTATTGTTATCACAT  
GGACATTAATGTAGACTACGATTCTTGGTAATATAATTGTGTGATTGTACATAATGATTTCGGAGAAAACAACAAA  
GCTCATGGCGATTAGCTTCTTGATTTTGGATAAGAGAATTCATGTAGTAGTTCTAAAATCTTTTATGTTTCAGCT  
TTTGGCTCCTCTCCCCATTGGGTTTGCAGTATTTTTGGTTTCATCTGGCCACCATCCCCATCACTGGAACCAGCAT

CAACCCTGCCAGGAGTCTTGGAGCTGCCATTATTTACAACAGAGATAACGCATGGGACGACCATGTAAGAATCTC  
TCTATGCAGATCCTTTATAACTCTCGTAATTATTAATCAGTAGTACATTTTCAACTAAAACCATTGTTTCTTTAC  
GTCGTCCAGTGGATCTTCTGGGTGGGACCTTCATTGGAGCTGCTCTTGCTGCTATTTACCACCAGATTGTGATC  
AGAGCCATTCTTTCAAGAGCAGCCAGGCCTGT**TAA**

>OleurPIP1;5a

ATGGCAGAAAACAGGGAAGAGGATGTTAGGCTTGGAGCCAACAAGTTTACTGAGAAGCAGCCTTTGGGTACAGCT  
GCTCAAACAGACAAGGACTACAAGGAGCCACCTCCAGCCCCCTTGTGTTGAGCCTGGGGAGATTAAATCATGGTCT  
TTTTACAGGGCTGGTATTGCAGAGTTTGTGGCTACCTTCTTGTTCTTGACATTACCATTTTGACTGTCATGGGG  
GTTGGTAGATCAAATAGTAAGTGTGCCTCTGTGGGCATCCAGGGGATTGCTTGGTCCTTTGGTGGCATGATTTTT  
GCACTTGTATACTGCACTGCTGGGATTTTCAGGAGGGCACATCAACCCTGCTGTGACCTTCGGTTTGTCTTGGCA  
AGGAAGCTTTCTTTGACCAGAGCTATCTTCTACATAGTGATGCAGTGCCTTGGTGCAATCTGTGGTGTCTGGTGT  
GTCAAGGGATTTCATGGAGGGTCCATACCAGAGGCTACAAGGTGGGGCCAACGTTGTGCAGCATGGCTACACCAAG  
GGTGATGGCCTTGGTGTGAGATTGTTGGCACTTTTATTCTTCTTTTGGCTCCTCTCCCCATTGGGTTTGCAGTA  
TTTTTGGTTTCATCTGGCCACCATCCCCATCACTGGAACCAGCATCAACCCTGCCAGGAGTCTTGGAGCTGCCATT  
ATTTACAACAGAGATAACGCATGGGACGACCATTTGGATCTTCTGGGTGGGACCTTCATTGGAGCTGCTCTTGCT  
GCTATTTACCACCAGATTGTGATCAGAGCCATTCTTTCAAGAGCAGCCAGGCCTGT**TAA**

>OleurPIP1;5a

MAENREEDVRLGANKFTEKQPLGTAAQTDKDYKEPPAPLFEPEIKSWSFYRAGIAEFVATFLFLYITILTVMG  
VGRSNSKCAVGIQGIASVFGMIFALVYCTAGISGGHINPAVTFGLFLARKLSLTRAIFYIVMQCLGAICGAGV  
VKGFMEGPYQRLQGGANVVQHGYTKGDGLGAEIVGTFILLAPLPIGFAVFLVHLATIPITGTSINPARSLGAAI  
IYNRDNAWDDHWIFWVGPFIGAALAAIYHQIVIRAIPFKSSQAC\*

## OleurPIP1;5b Oleur061Scf0451g01009.1

>Oleur061Scf0451:160899..163458 (- strand) class=gene length=2560

>OleurPIP1;5b

**ATG**GCGGAGAACAGGGAAGAGGATGTGAGGCTTGGAGCCAACAAGTTCACTGAGAAGCAGCCTTTGGGTACAGCT  
GCTCAAACAGACAAGGACTACAAGGAGCCACCTCCAGCCCCCTTGTGTTGAGCCTGGGGAGCTGAAATCATGGTCT  
TTTTACAGGGCTGGCATTGCAGAGTTTGTGGCCACTTTCTTGTTCTTGACATAACGATCTTGACTGTTATGGGA  
GTTGGTAGATCACATAATAAGTGTGCCTCTGTGGGCATCCAGGGGATTGCTTGGTCCTTTGGTGGCATGATTTTT  
GCATCTGTATACATGCATGCCGGGATTTCAG**GTTAGT**TTTTATCCAGATTACTGTGCTTCTCTTTGCATGCCTA  
CTGTTTGTTCGTTTACTCTGAATTTGGGAAAAAATGTGCTCTTCTCTTTTGTGTTTATGGGGTTTCTCGGTTT  
GTTTTAGATAGGAAAGTTGTGGTAAATTATGAATGATTGTCACTGGCTCTGGTTGTATAAGTCTTTATTTATCC  
AGTGATATTTTCATTTTGGAGAAAAGCTAGGATCTTGGTGATTTTTCTAGCTACCTGGTTTCAAATTTGTCACTA  
CTCTATAGAAGCTTTCAAATTTGAAGCTCAAAAAGCTGAATCTTTGTGCTGTCTGTTGAACAGGGGGGCACATCAA  
CCCTGCTGTGACTTTTGGTTTGTCTTGGCAAGGAAGCTTTCTTTTACCAGGGCTATCTTTTACATAGTGATGCA  
GTGCCTTGGTGCAATCTGTGGTGTGCTGGTGTGGTCAAGGGATTTCATGGAGGGTCCATACCAGAGACTGCAAGGTGG  
GGCCAACATGGTCCAGCATGGCTACACCAAGGGTGATGGCCTTGGTGTGAGATTGTTGGCACTTTTATTCTTGT  
TTACACCGTCTTCTCTGCCACTGATGCCAAGAGAAGCGCCCGAGACTCACATGTTCCG**GTATA**CCCTTCTTTGTT  
ATTTATAGCCATAGGCCAATGTTTACTTTTCTTATTGATACTTGATTAGACTTGCTGGTAAAGACAGGATTTGG  
TGCTTTGATCTGTTAGTTACTACTTCAACTTAAGCTTTCTTAATTCCTATCATGCCTTGTTTACTAGTGTCCTAAA  
AAGTGGTATTGATGATTTAATTATAATTGTGTAGCTAGAATGCTCGGTTTTTTTCTAATTTTCATTCGGACATTGA  
GCACAAATGCTTATTTAGATCCACTTTCTTCAAGTCATTCAATGAAATCTTGACATGATATGAGGCTTATATGTT  
TAGTTATTAAGGTGCCGTTTCAGGCCAAAAGTCACTATACCGAATGTCAACCAACATGGATGTATCATCTCACCT  
AGTTGTTGTCTGTTTGGCGCTTTTTATAATTGGTCAAACATGCTTTTTATTTGCATATTTTGTGGGACCCATTA  
GTACTATCCGAGAACCTGTAAACTCGTGAGTCATTAAAGGTTATCATTTTGTCTATGTGAAAAGATAATCCATGC  
AGTAGAGTCCTAAAATTTCTTTAATCTTGCAGATTTTGGCTCCTCTCCCCATTGGGTTTGGCGTATTTTGGTTCA  
TTTGGCCACCATCCCGTCACTGGAACCGGCATCAACCCAGCCAGGAGTCTTGGAGCTGCCATCATTTACAACAA  
AGAGCACGTATGGAGCGACCAC**GTAAGA**ATCTCCCTATGCTTAGATTCAATTATAATTTATCGTAATTATGAATCA  
**GTTGTAA**ATTTCAATTGAAACTCATGTTTGTGTTACGTCGTT**CAG**TGGATCTTCTGGGTCCGACCCCTCATCGGAG  
CTGCTCTTGCTGCAATCTACCACCAGATTGTGATCAGAGCCATTCTTTCAAGAGCAGCAGGGCTTGT**TAA**

>OleurPIP1;5b

**ATG**GCGGAGAACAGGGAAGAGGATGTGAGGCTTGGAGCCAACAAGTTCACTGAGAAGCAGCCTTTGGGTACAGCT  
GCTCAAACAGACAAGGACTACAAGGAGCCACCTCCAGCCCCCTTGTGTTGAGCCTGGGGAGCTGAAATCATGGTCT  
TTTTACAGGGCTGGCATTGCAGAGTTTGTGGCCACTTTCTTGTTCTTGACATAACGATCTTGACTGTTATGGGA  
GTTGGTAGATCACATAATAAGTGTGCCTCTGTGGGCATCCAGGGGATTGCTTGGTCCTTTGGTGGCATGATTTTT  
GCACTTGTATACTGCACTGCCGGGATTTTCAGGGGGGCACATCAACCCTGCTGTGACTTTTGGTTTGTCTTGGCA  
AGGAAGCTTTCTTTTACCAGGGCTATCTTTTACATAGTGATGCAGTGCCTTGGTGCAATCTGTGGTGTCTGGTGTG  
GTCAAGGGATTTCATGGAGGGTCCATACCAGAGACTGCAAGGTGGGGCCAACATGGTCCAGCATGGCTACACCAAG  
GGTGATGGCCTTGGTGTGAGATTGTTGGCACTTTTATTCTTGTGTTTACACCGTCTTCTCTGCCACTGATGCCAAG  
AGAAGCGCCCCGAGACTCACATGTTCCGATTTTGGCTCCTCTCCCCATTGGGTTTGGCGTATTTTGGTTTCATTTG



GCCACCATCCCCGTCACCTGGAACCGGCATCAACCCAGCCAGGAGTCTTGGAGCTGCCATCATTTACAACAAAGAG  
CACGTATGGAGCGACCACTGGATCTTCTGGGTCGGACCCCTTCATCGGAGCTGCTCTTGCTGCAATCTACCACCAG  
ATTGTCATCAGAGCCATTCTCTTTCAAGAGCAGCAGGGCTTGT**TAA**

**>OleurPIPI1;5b**

MAENREEDVRLGANKFTEKQPLGTAAQTDKDYKEPPAPLFEPEGELKSWSFYRAGIAEFVATFLFLYITILTVMG  
VGRSHNKCASVGIQGIAWSFGGMIFALVYCTAGISGGHINPAVTFGLFLARKLSFTRAIFYIVMQCLGAICGAGV  
VKGFMEGPYQRLQGGANMVQHGYTKGDGLGAEIVGTFILVYTVFSATDAKRSARDSHVPI LAPLP IGF AVFLVHL  
ATIPVTGTGINPARSLGAALIIYNKEHVWSDHWIFVWGPFIGAALAAIYHQIVIRAIPFKSSRAC\*

## **OleurPIPI1;6a Oleur061Scf6143g00002.1**

**>Oleur061Scf6143:10938..14002 (- strand) class=gene length=3065**

**>OleurPIPI1;6a**

**ATG**GAGGGTAAAGAGGAGGATGTAAGGCTAGGAGCCAACAAATTCACAGAGAGGCAGCCATTGGGTACCTCAGCA  
CAGAGCAAGGACTACAAGGAGCCACCTCCAGCTCCACTTTTTGAGCCTGGTGAACCTCAATCATGGTCCTTTTGG  
AGGGCTGGGATTGCTGAGTTTATGGCCACTTTCTTGTTCTCTTATATCACGATCTTGACTGTAATGGGTGTGAGC  
AGGTCTAACAGTAAGTGTACTTCTGTGGGTATTACAGGGCATTGCTTGGGCCTTTGGTGGCATGATTTTGGCCCTT  
GTCTACTGCACTGCCGGCATCTCAGGTCTCTGTCTCTCAATTTGTGTGTGTTCTGTTCTCTGTTACTTAAATAAA  
TTTAGGGTCTGCTGTTTGGTAGTGGACTGGATTTATAATGAACAAGATTTAACTTCGAACTTGCCAAGAATGTAT  
TAGTACTACTAATATTGAGTTCTCATTTTTTCATGGGATCTTGGAAAATGTAAAGCATGCAGCTTCTGTCTAAGTTC  
TACTACCTGTTGCTTAAGTGAATCGAGAGTCTTGCTAGTTTGGTATGCAGTATTAGATGGAACCTAGTAGTATAAA  
GAACAAGATTATATCTTCGAACATGCCAAGAATGTTAATGCACCACTAATTATGAGTCCATATTTTCATGGGATC  
TTGAAAAATGTAAGTATGCGGCTTCTTTTTGTTTTTATAATCTGTTTGCTTAAGTAAATATCGAGTCTTGTGTGT  
TTCGTGTGTAGAAGTGGATGGAATTATATCACATAATGTACAAGTATGATCTTCAAACATGCCAAGAATGTACTA  
CTAGTTTTAAAAAATCTCGAGTCTTGCTGCTGGATGGAACCTATATAGTATAATGAACAAAATTTGACAACATGC  
CAAGAATGTACCACTGGTTTAAAGTAAATCTAGATTCTTGGTAAGCAATACCAGACAACATTGAATAGTGAACAAG  
ATTTGATCTTTAAACATGACAAGAACGTCCTATTACTAGAGTCTTGCTGTTTAAATACGTAGTATACGATGAGAC  
TAAATAATATAATGAACAAGATTGATCTTCTAACATGCCAAGAATATACTACTAAGTAAATCCAGAGTCTCGACT  
GTTTGGTAGCAATATTGGACAAGACGATTTTATCCTCCAAAAAGACAAGAATGTACTAATACTTTTGAACCCCTC  
ATTTTCATGGGATTTTGGCAAATGGAAAGTAGAGTAATTTGTTATTGTTTGTGATAATTTGCTGTGTGTTTTTGA  
GTTTTAAGTCTTGAATGTCACAGAATTTAAACCCTGCTTCTTCTTTTTTCAAATCCTGCTAAAAATTTAATGGTTT  
TTGTTCTTTTAGTTCTACTCTCCTTGATGCTAAGCAAAAAATATTTCTTCAAATATGAGTTCAACTTATAATTCA  
TACAAAAAAGGCCAAATCTTTGATATAATTTCTGGAAGAAGTATGATAAGTGATTATAATGCCCTTGTTTA  
AAGATTATTGGAGCTTTTCATGTGCTGATATTTGAAATTTTTTATGGGTAATTT**CAG**GTGGACACATAAATCCTG  
CAGTAACATTTGGTCTATTCTGTAGCAAGGAAATGTCTCTGACCAGGGCAATTTTCTACATTGTGATGCAATGCC  
TTGGCGCAATCTGCGGCGCGGGTGTCGTAAAGGGCTTCGGGCCTTCTTTTTTACAAGGCTAACGGTGGTGGTGCTA  
ATGTTGTTGCCCATGGTTACACTAAGGGTGATGGACTTGGTGCTGAGATTATTGGCACCTTTGTTCTTGTTTACA  
CTGTCTTCTCTGCTACTGATGCCAAGAGAAATGCCAGAGACTCGCATGTCCCT**GTGAGTATTTCTTTTTTAATCGT**  
GATTTTGAAAAGTGTTTTACTTTCAATGCAGTTTAGTATTAGTATTATTTTTTATGCTGAGGAAGGTATCATAGA  
TATTTTAAACCATGTATTCTTGCTCGTCGGCTATAGATTATGTTTGTGTTGGGAAAATTGGACTTCTTCATTGA  
GAGTGGGCAAGACCCGGTCTGCATTCTGTTTGATTGTGCTCGATCTGAAATTCGAGTCTTGAAAAGATATGTTG  
GGCTACGATGGAATGATTTGGTCAATCAATAGTGTGCTCGAGCACTTTGATTCGAAATTCGAAAGTCTGATTTCG  
ACTTTCTTTTGCACCTTTGATTCTTCTTCTATTTTCATGGTCAAACCTAGAAAACGAGTAATTTTGAGATTTAACTTG  
GCCTCAACTGTATGATTTGTGCCATAACTAGAATCTCATTGTGGGATGCCATCTTGATGACTACTAATTTTTTCGA  
ATTT**TCATAG**ATTTTAGCTCCACTCCCAATTGGGTTTGCCGTCTTTTTGGTTCACTTGGCAACAATCCCCATCACT  
GGAACCGGTATCAACCCAGCCCCGAAGCCTTGGTGCTGCCATCATTTACAACAAAGATCACGCTTGGGACGACCAT  
GTAAGTTTTACGTCTGTAACCTCCATAGACTAGTCTTACCTT**CATGAC**ATTAGGCGCCCGCGCGTA  
CTTATATTTGTGTCATTTCTGTCTTTCTT**CAG**TGGATCTTTTGGGTGCGACCTTTCATCGGAGCTGCACTCGCTG  
CCCTTTACCACCAGGTTATCATTAGAGCTATCCCATTCAAGAGTGGAAC**TGA**

**>OleurPIPI1;6a**

**ATG**GAGGGTAAAGAGGAGGATGTAAGGCTAGGAGCCAACAAATTCACAGAGAGGCAGCCATTGGGTACCTCAGCA  
CAGAGCAAGGACTACAAGGAGCCACCTCCAGCTCCACTTTTTGAGCCTGGTGAACCTCAATCATGGTCCTTTTGG  
AGGGCTGGGATTGCTGAGTTTATGGCCACTTTCTTGTTCTCTTATATCACGATCTTGACTGTAATGGGTGTGAGC  
AGGTCTAACAGTAAGTGTACTTCTGTGGGTATTACAGGGCATTGCTTGGGCCTTTGGTGGCATGATTTTGGCCCTT  
GTCTACTGCACTGCCGGCATCTCAGGTGGACACATAAATCCTGCAGTAACATTTGGTCTATTTCGTAGCAAGGAAA  
TTGTCTCTGACCAGGGCAATTTTCTACATTGTGATGCAATGCCTTGGCGCAATCTGCGGCGCGGGTGTCGTAAG  
GGCTTCGGGCCTTCTTTTTACAAGGCTAACGGTGGTGGTGCTAATGTTGTTGCCCATGGTTACACTAAGGGTGAT  
GGACTTGGTGCTGAGATTATTGGCACCTTTGTTCTTGTTTACACTGTCTTCTCTGCTACTGATGCCAAGAGAAA  
GCCAGAGACTCGCATGTCCCTATTTTAGCTCCACTCCCAATTGGGTTTGCCGTCTTTTTGGTTCACTTGGCAACA  
ATCCCCACTCTGGAACCGGTATCAACCCAGCCCCGAAGCCTTGGTGCTGCCATCATTTACAACAAAGATCACGCT  
TGGGACGACCATTTGGATCTTTTGGGTGCGACCTTTTCATCGGAGCTGCACTCGCTGCCCTTTACCACCAGGTTATC  
ATTAGAGCTATCCCATTCAAGAGTGGAAC**TGA**

**>OleurPIP1;6a**

MEGKEEDVRLGANKFTERQPLGTSAQSKDYKEPPAPLFEPEGELQSWSFWRAGIAEFMATFLFLYITILTVMGVSRNSNKCTSVGIQGIAWAFGGMIFALVYCTAGISGGHINPAVTFGLFVARKLSLTRAIFYIVMQCLGAICGAGVVKFGFPSFYKANGGGANVVAHGTYTKGDGLGAEIIGTFVLVYTVFSATDAKRNARDSHVPILAPLPIGFAVFLVHLATIPITGTGINPARSLGAIIYNKDHAWDDHWIFVWGPFIGAALAALYHQVIRAIIPFKSGN\*

**OleurPIP1;6b Oleur061Scf8779g00011.1**

>Oleur061Scf8779:132959..136100 (- strand) class=gene length=3142

**>OleurPIP1;6b**

**ATG**GAGGGTAAAGAGGAGGATGTAAGGCTAGGAGCCAACAAATTCACAGAGAGGCAGCCATTGGGTACCTCAGCA  
CAGAGCAAGGACTACAAGGAGCCACCTCCAGCTCCACTTTTTGAGCCTGGTGAACCTCAATCATGGTCCTTTTGG  
AGGGCTGGGATTGCTGAGTTTATGGCCACTTTCTTGTTCCTTTATATCACGATCTTGACTGTAATGGGTGTGAGC  
AGGTCTAACAGTAAGTGTACTTCTGTGGGTATTACAGGGCATTGCTTGGGCCTTTGGTGGCATGATTTTTGCCCTT  
GTCTACTGCACTGCCGGCATCTCAGGTCTCTGTCTCTCAATTTGTGTGTGTTCTGTCTCTGTCTTAAATAAA  
TTTAGGGTCTGCTGTTTGGTAGTGGACTGGATTTATAATGAACAAGATTTAACTTCGAACCTTGCCAAGAATGTAT  
TAGTACTACTAATATTGAGTTCTCATTTTTATGGGATCTTGGAAAATGTAAAGCATGCAGCTTCTGTCTAAGTTC  
TACTACCTGTTGCTTAAGTGAATCGAGAGTCTTGCTAGTTTGGTATGCAGTATTAGATAGAAGTAGTAGTATAAA  
GAACAAGATTATATCTTCGAACATGCCAAGAATGTTAATGCACCACATAATTTGAGTCCATATTTTCATGGGATC  
TTGAAAAATGTAAGTATGCGGCTTCTTTTTTGTGTTTATAATCTGTTGCTTAAGTAAATATCGAGTCTTGTGTGT  
TTCGTGTGTAGAAGTGGATGGAATTATATCACATAATGTACAAGTATGATCTTCAAACATGCCAAGAATGTACTA  
CTAGTTTAAAAAATCTCGAGTCTTGCATGCTGGATGGAACATATAGTATAATGAACAAAATTTGACAACATGC  
CAAGAATGTACCACTGGTTTAAAGTAAATCTAGATTCTTGGTAAGCAATACCAGACAACATTGAATAGTGAACAAG  
ATTTGATCTTTAAACATGACAAGAAGCTCTATTACTAGAGTCTTGCCTGTTTAAATACGTAGTATACGATGAGAC  
TAAATAATATAATGAACAAGATTGATCTTCTAACATGCCAAGAATATACTACTAGTTTAAAGTAAATCCAGAGTCT  
TGACTGTTTGGTAGCAATATTGGACAAGACGATTTTATCCTCCAAAAAAGACAAGAATGTACTAATACTTTTGAA  
CCCTCATTTTTCATGGGATTTTGGCAAATGGAAAGTAGAGTAATTTCTTATTGTTTGTGATAATTTGCTGTGTGTT  
TTTGAGTTTAAAGTCTTGAATGTACAGAATTTAAACCCCTGCTTTTTTTTTATCAAATCCTGCTAAAAATTTAATG  
GTTTTTGTCTTTTAGTTCTACTCTCCTTGATGCTAAGCAAAAAATATTTCTTCAAATATGAGTTCAACTTATAA  
TTCATACAAAAAAGGTCAAATCTTTGATATAATTTCTGGAAGAAGTATGATTAGTGATTATAATGCCCTTG  
TTTAAAGATTATTGGAGCTTTTCATGTGCTGATATTTGAAATTTTTATGGGTAATTTTCAGGTGGACACATAAAT  
CCTGCGAGTAACATTTGGTCTATTCTAGCAAGGAATTTGCTCTTACCAGGGCAATTTCTACATTGTGATGCAA  
TGCCTTGGCGCAATCTGCGGCGCGGGTGTCTGTAAGGGCTTCGGGCCTTCTTTTTTACAAGGCTAACGGTGGTGGT  
GCAAATGTTGTTGCCCATGGTTACACTAAGGGTGATGGACTTGGTGCTGAGATTATTGGCACCTTTGTCTTGTGTT  
TACACTGTCTTCTCTGCTACTGATGCCAAGAGAAATGCCAGAGACTCGCATGTCCCCGTGAGTATTTCTTTGTAA  
TCGTGATTTTGAAGAAGTGTCTTACTTTCAATGCAGTTTAGTATTAGTATTATTTTTTATGCTGAGGAAGGTATCA  
TAGATATTTTAAACATGTATTCTTGCCTCGTCGGCTATAGATTATGTTTGTGTTGGGAAAATTTGACTTTCTTCA  
TTGAGAGTGGGCAAGACCGGGTCTGCATTCTGTTTGATTGTGCTCGATCTGAAATTCGAGTCTTGAAGTATAT  
GTTGGGCTACGATGGAATGATTTGGTCAATCAATAGTGTGCTCGAGCACTTTGATTTGAAATCTGAAAGTGTGA  
TTCGACTTTCTTTTGCATTTGATTCTTCTTCTATTTTCATGGTCAAACATAGAAACGAGTAATTTTGAGATTTAA  
CTTGGCCTCAACTGTATGATTTGTGCCATAACTAGAATCTCATTTGTGGGATGCCATCTTGATGACTACTAATTTT  
TCGAATTTTCATAGATTTTAGCTCCACTCCCAATTGGGTTTGCCGTCTTTTTGGTTCACTTGGCAACAATCCCCAT  
CACTGGAACCGGTATCAACCCAGCCCGAAGCCTTGGTGTGCTGCCATCATTTACAACAAAGATCACGCTTGGGACGA  
CCATGTAAGTTTTACGTCTGTAACCTCCATAGACTATGTTCTTACCTGTTTCATGACATATGATTAGCGCCCGGC  
CGTACTTATATTTGTGTCACTTCTGTCTTTCTTCAGTGGATCTTTTGGGTCGGACCTTTTCATCGGAGCTGCACTC  
GCTGCCCTTTACCACCAGGTTATCATTAGAGCTATCCCATTCAAGAGTGGCAAC**TGA**

**>OleurPIP1;6b**

**ATG**GAGGGTAAAGAGGAGGATGTAAGGCTAGGAGCCAACAAATTCACAGAGAGGCAGCCATTGGGTACCTCAGCA  
CAGAGCAAGGACTACAAGGAGCCACCTCCAGCTCCACTTTTTGAGCCTGGTGAACCTCAATCATGGTCCTTTTGG  
AGGGCTGGGATTGCTGAGTTTATGGCCACTTTCTTGTTCCTTTATATCACGATCTTGACTGTAATGGGTGTGAGC  
AGGTCTAACAGTAAGTGTACTTCTGTGGGTATTACAGGGCATTGCTTGGGCCTTTGGTGGCATGATTTTTGCCCTT  
GTCTACTGCACTGCCGGCATCTCAGGTGGACACATAAATCCTGCAGTAACATTTGGTCTATTCTTAGCAAGGAAA  
TTGTCTCTTACCAGGGCAATTTTCTACATTGTGATGCAATGCCTTGGCGCAATCTGCGGCGCGGGTGTCTGTAAG  
GGCTTCGGGCCTTCTTTTTACAAGGCTAACGGTGGTGGTGCAATGTTGTTGCCCATGGTTACACTAAGGGTGAT  
GGACTTGGTGTGAGATTATTGGCACCTTTGTTCTTGTTCACATGTCTTCTCTGCTACTGATGCCAAGAGAAAT  
GCCAGAGACTCGCATGTCCCCATTTAGTCTTACCTCCCAATTTGGGTTTGGCGTCTTTTTGGTTCACTTGGCAACA  
ATCCCCATCACTGGAACCGGTATCAACCCAGCCCGAAGCCTTGGTGTGCTGCCATCATTTACAACAAAGATCACGCT  
TGGGACGACCATTTGGATCTTTTGGGTCGGACCTTTTCATCGGAGCTGCACTCGCTGCCCTTTACCACCAGGTTATC  
ATTAGAGCTATCCCATTCAAGAGTGGCAAC**TGA**

**>OleurPIP1;6b**

MEGKEEDVRLGANKFTERQPLGTSAQSKDYKEPPAPLFEPEGELQSWSFWRAGIAEFMATFLFLYITILTVMGVS  
RSNSKCTSVGIQGIAWAFGGMIFALVYCTAGISGGHINPAVTFGLFLARKLSLTRAIFYIVMQCLGAICGAGVVK  
GFGPSFYKANGGGANVVAHGYYTKGDGLGAEIIGTFVLVYTVFSATDAKRNARDSHVPILAPLPFIGFAVFLVHLAT  
IPITGTGINPARSLGAAIINYKDHAWDDHWIFVWGPFIGAALAALYHQVIIRAIPFKSGN\*

### **OleurPIP2;1a Oleur061Scf0523g01011.1**

>Oleur061Scf0523:148832..151185 (+ strand) class=gene length=2354

>**OleurPIP2;1a**

**ATG**ACGAAAGACGTGCAATCTCATGTGGAGCCAGCGGAGGAATACTCCGCCAAGGACTACCATGATCCGCCACCG  
GCGCCTCTCATTGATTTTGTAGAGCTGAGCAGCTGGTTCGTTTTACAGAGCACTTATTGCTGAGTTTCGTTGCCACT  
TTGCTGTTCCTTTACGTCACAGTTTTGACCGTTATAGGCTACAAAAGCCAGATTGACCCAGCTCACGGCGGCGAC  
GACTGCGGCGGCGTTGGGATTCTTGGCATTGCATGGGCTTTCGGCGGCATGATTTTCATTCTGTCTACTGCACC  
GCCGGTATCTCTG**TCAGTTTTACAGTTTTACGCCAGCTTTTCCTTGATTGGTACCTGCACCATAATAAGTAAAT**  
**TACTTGTGAAAATAAGTAACTTTTTTCATATTGTGACAGGAGGACATATTAACCCGGCAGTGACATTAGGGCTGTT**  
**CTTGGAAGAAAGGTGTC**ACTGATCAGAGCAGTGCTTTACATGGTAGCACAATGTTTGGGTGCAATCTGTGGTGT  
GGGATTGGTGAAAGCATTCCAAAAATCGTACTATCATAAGTATGGTGGTGGAGCAAATGAACTTGCTCCAGGGTA  
CAACAAGGGGTGGTTTGGGTGCTGAAATTATTGGCACCTTTGTTTTGGTCTACACCGTTTTCTCAGCCACTGA  
TCCTAAGAGGAATGCCAGAGACTCCCATGTCCCT**GTAAGCACTTTTTTCTCTGCTAACGCACCCACACCCCCAA**  
**GTCTTATTATCCCAAGGGAGGAGTTCTCCTCGGAATAACAACCCCTTGATTGGATGTTTTAAATTTGTTTTTGG**  
**GCAAAATCCAATGAAGTTTTGCCATTTGACAACCTGTAACCTCTGGCAAATTTGTTGTACATATAACATGGTT**  
**CGTTCTCCACAGAATCATTTTTTTGCCACTAATCTGTCTGCTACTAAAGGTGTCATAAAATCGCGTGGGGTTCATCA**  
**GGGTCTAAATTAATTTGTACACGGGTCAACGGGCAATAATAAGTTCTTGACCCAAAGTCCATCAATGAACTTTA**  
**ATTTATAGAAAATTTTGGATTATATCCTTGCAAATATTGATTAACTGATACATATGAAG**GTCTTGGCTCCACT  
TCCCATCGGATTTGCTGTGTTTCATGGTTCACCTTGCCACCATCCCCATCACCGGAAGTGGCATCAACCTTGCTAG  
GAGCTTTGGAGCTGCTGTCTATCTACAACGAAGACAAGCCCTGGGATGACCAT**GTATGCCTCCCTTTTACCTCTTT**  
**TTTACTGATTTTACACGCACAATAAGTTGATCAATCCTTTTTTTTTAAATTGTAATTATTTTTATAGAATTTAATG**  
**ACATAATTCATAAAAGCTAGTCAAGTCCCCAATTTATCTTTTTAGTTTTTGGACAAGGGTATCTCAATTTGATAC**  
**AAAAACAAGTAGGAGGTCCCAGATTCAAGTTGCACCTCCACTCATTTATAAAAAATATGCACGTCTCATGTCTGCG**  
**CATGAGGACATGTGTTCAAGACGTAATTTAACACATTCTCTCCCGTTAACACATTAAGCCCCCTGTTTGATAGGG**  
**ATTAAATCAGATTATAATAGATTTTGATAAAAGTTGATGAAATGTGTACTTGAAAAGTTGTGGGTCCCCATAA**  
**ATATGTTGTTGATAATTAATTAAATTTGACTAGATTAAATCTGAATTTTAAATTTTACCAAACATGGACTA**  
**AGCTTTTAAACGAGTTATTAAAAACGAAGATAGTACTAATATATTTGTTAATATTTCAGTGGATTTTTTGGGTGG**  
**ACCATTTCGTTGGAGCTCTAATTGCTGCAATCTACCACCAATACATCCTAAGGGCAGGAGCCATCAAGGC**ACTGGG  
TTCTTTTCAGGAGCAACGCT**TAA**

>**OleurPIP2;1a**

**ATG**ACGAAAGACGTGCAATCTCATGTGGAGCCAGCGGAGGAATACTCCGCCAAGGACTACCATGATCCGCCACCG  
GCGCCTCTCATTGATTTTGTAGAGCTGAGCAGCTGGTTCGTTTTACAGAGCACTTATTGCTGAGTTTCGTTGCCACT  
TTGCTGTTCCTTTACGTCACAGTTTTGACCGTTATAGGCTACAAAAGCCAGATTGACCCAGCTCACGGCGGCGAC  
GACTGCGGCGGCGTTGGGATTCTTGGCATTGCATGGGCTTTCGGCGGCATGATTTTCATTCTGTCTACTGCACC  
GCCGGTATCTCTGGAGGACATATTAACCCGGCAGTGACATTAGGGCTGTTCTTGGAAGAAAGGTGTCACTGATC  
AGAGCAGTGCTTTACATGGTAGCACAATGTTTGGGTGCAATCTGTGGTGTGGGATTGGTGAAAGCATTCCAAAAA  
TCGTACTATCATAAGTATGGTGGTGGAGCAAATGAACTTGCTCCAGGGTACAACAAAGGGGTGGTTTGGGTGCT  
GAAATTATTGGCACCTTTGTTTTGGTCTACACCGTTTTCTCAGCCACTGATCCTAAGAGGAATGCCAGAGACTCC  
CATGTCCCTGTCTTGGCTCCACTTCCATCGGATTTGCTGTGTTTCATGGTTCACCTTGCCACCATCCCCATCACC  
GGAAGTGGCATCAACCTTGCTAGGAGCTTTGGAGCTGCTGTCTATCTACAACGAAGACAAGCCCTGGGATGACCAT  
TGGATTTTTTGGGTGGACCATTCGTTGGAGCTCTAATTGCTGCAATCTACCACCAATACATCCTAAGGGCAGGA  
GCCATCAAGGCCTGGGTTCTTTTCAGGAGCAACGCT**TAA**

>**OleurPIP2;1a**

MTKDVEHVPAEEYSADYHDPAPPLIDFDELSSWSFYRALIAEFVATLLFLYVTVLTVIGYKSQIDPAHGGD  
DCGGVGILGIAWAFGGMIFILVYCTAGISGGHINPAVTLGLFLGRKVSILRAVLYMVAQCLGAICGVGLVKAFQK  
SYHKGYYGGANELAPGYNKGVLGAEIIGTFVLVYTVFSATDPKRNARDSHVPVLAAPLPFIGFAVFMVHLATIPIT  
GTGINPARSFGAIVIYNEKPDHWHWIFVWGPVFGALIAAIYHQYILRAGAIKALGSFRSNA\*

### **OleurPIP2;1b Oleur061Scf0872g05024.1**

>Oleur061Scf0872:512608..514991 (+ strand) class=gene length=2384

>**OleurPIP2;1b**

**ATG**ACGAAAGACGTGCAATCTCATGTGGAGCCAGCGGAGGAATACTCCGCCAAGGACTACCATGATCCACCACCG  
GCGCCTCTCATTGATTTTGTAGAGCTGAGCAGCTGGTTCGTTTTACAGAGCACTTATTGCTGAGTTTCGTTGCCACT  
TTGCTGTTCCTTTACGTACAGTTTTGACCGTTATAGGCTACAAAAGCCAGATTGACCCAGCTCACGGCGGCGAC  
GACTGCGGCGGCGTTGGGATTCTTGGCATTGCATGGGCTTTCGGTGAATGATTTTCATTCTTGTCTACTGCACC  
GCCGGTATCTCTG**GT**CAGTTTTTACAAGTTTT**CAGCCAGCTTTTTCTTTGATTGGTACCTGCACCATAATAAGTAAAT**  
**TACTCGTGAAAATAAGTAACTTTTTTCATATTGTGACAG**GAGGACATATTAACCCGGCAGTGACATTAGGGCTGTT  
CTTGGGAAGAAAGGTGTCACCTGATCAGAGCAGTGCTTTACATGGTAGCACAAATGTTTGGGTGCAATCTGTGGTGT  
GGGATTGGTGAAAGCATTCCAAAAATCGTACTATCATAAGTATGGTGGTGGAGCAAATGAACCTTGCTCCAGGGTA  
CAACAAAGGGGTTGGTTTTGGGTGCTGAAATTATTGGCACCTTTGTTTTGGTCTACACCGTCTTCTCAGCCACTGA  
TCCTAAGAGGAATGCCAGAGACTCCCATGTCCCT**GTAAGCACTTTTTTCTCTGCTAACCCACCCACACCCCCAAG**  
**TCTTATTATCCCAAGAAAGGAGTTCTCCTCGGAATAAGCCAGGGAAGTGACAGGGGTTGAGATGGCAGCCCTTG**  
**ATTGGATGTTATAAATTTGTTTTTTTTGGGCAAACCTCCAATGAAGTTTTGCCATTTGACAACCTGTAACCTCTTG**  
**GCAAATTTGTTGTACATATAACATGGTTCGTTCTCCTCAGAATCAATTTTTTGGCCACTAATCTATCGTACTAAAG**  
**GTGTCATAAAATCGCGTGGGGTTCATCAGGGTCCTTAATTGATTGTACACAGTCAATGGGCAATAATAAGTTCC**  
**TGACCCAAAGTCCATCAATGAACTTTAATTTATAGAAAATTTTGGATTATATCCTTGCAAATATTGATTTAATCT**  
**GATACATATGAAGGTCTTGGCTCCACTTCCCATCGGATTTGCTGTGTTTCATGGTTCACCTTGCCACCATCCCCAT**  
**CACCGGAACCTGGCATCAACCCTGCTAGGAGCTTTGGAGCTGCTGTGCATCTACAACGAAGACAAGCCCTGGGATGA**  
**CCATGTATGCCTCCCTTTACCTCTTTTTTACTGATTTTACACGCACAATAAGTTGATCAATCCTTTTTTTTTTT**  
**TTTTTTTTTAAATTTTAATTATTTTGTAGACTTTAATGACATAATTCATAAAAGCTAGTCAAGTCCCCAATTTA**  
**TCTTTTTTAGTTTTTGGACAAGGGTATCTCAATTTGATACAAAAACAAGTAGGAGTTCCCGAGTTCAAGTTGCAC**  
**TCCACTCATTTATAAAAAATATGCACGTCTCATGTCTGCGCATGAGGACATGTGTTCAAGACATAATTTAATACAT**  
**TCCTCTCCCGTTAACACATTAAGCCCCTGTTTGATAGGGATTAAATCAGATTTATAATAGATTTTGATAAAAAGTT**  
**AATGAAATGTGTGCTTGAAAAGTTGTGGTCCCCTAAAATATGTTGTTAGAATTAATTGTTAAATTTGACTTAAAT**  
**TAAAATCTGAATTTTAATTTTTTACCAAACATGGACTAAGCTTTTAAACGAGTTATTAATAAATGAAGATAGTACTA**  
**ATATATTTGTTAATATACAG**TGGATTTTTTGGGTTGGACCATTTCGTTGGAGCTCTAATTGCTGCAATCTACCACC  
AATACATCCTAAGGGCAGGAGCCATCAAGGCACTGGGATCTTTCAGGAGCAACGCT**TAA**

**>OleurPIP2;1b**

**ATG**ACGAAAGACGTGCAATCTCATGTGGAGCCAGCGGAGGAATACTCCGCCAAGGACTACCATGATCCACCACCG  
GCGCCTCTCATTGATTTTGTAGAGCTGAGCAGCTGGTTCGTTTTACAGAGCACTTATTGCTGAGTTTCGTTGCCACT  
TTGCTGTTCCTTTACGTACAGTTTTGACCGTTATAGGCTACAAAAGCCAGATTGACCCAGCTCACGGCGGCGAC  
GACTGCGGCGGCGTTGGGATTCTTGGCATTGCATGGGCTTTCGGTGAATGATTTTCATTCTTGTCTACTGCACC  
GCCGGTATCTCTGGAGGACATATTAACCCGGCAGTGACATTAGGGCTGTTCTTGGGAAGAAAGGTGTCACCTGATC  
AGAGCAGTGCTTTACATGGTAGCACAAATGTTTGGGTGCAATCTGTGGTGTGGGATTGGTGAAAGCATTCCAAAAA  
TCGTACTATCATAAGTATGGTGGTGGAGCAAATGAACCTTGCTCCAGGGTACAACAAAGGGGTTGGTTTTGGGTGCT  
GAAATTATTGGCACCTTTGTTTTGGTCTACACCGTCTTCTCAGCCACTGATCCTAAGAGGAATGCCAGAGACTCC  
CATGTCCCTGTCTTGGCTCCACTTCCCATCGGATTTGCTGTGTTTCATGGTTCACCTTGCCACCATCCCCATCACC  
GGAAGTGGCATCAACCCTGCTAGGAGCTTTGGAGCTGCTGTGCATCTACAACGAAGACAAGCCCTGGGATGACCAT  
TGGATTTTTTGGGTTGGACCATTTCGTTGGAGCTCTAATTGCTGCAATCTACCACCAATACATCCTAAGGGCAGGA  
GCCATCAAGGCACTGGGATCTTTCAGGAGCAACGCT**TAA**

**>OleurPIP2;1b**

MTKDVESHVEPAEEYSADYHDPAPPLIDFDELSSWSFYRALIAEFVATLLFLYVTVLTVIGYKSQIDPAHGGD  
DCGGVGILGIAWAFGGMIFILVYCTAGISGGHINPAVTLGLFLGRKVSILIRAVLYMVAQCLGAICGVGLVKAFQK  
SYHKYGGGANELAPGYNKGVLGAELIGTFVLVYTVFSATDPKRNARDSHVPVLAPLPIGFAVFMVHLATIPIT  
GTGINPARSFGAAVIYNEDKPWDDHWIFWVGPFVGALIAAIYHQYILRAGAIKALGSFRSNA\*

## **OleurPIP2;2a Oleur061Scf6622g04008.1**

**>Oleur061Scf6622:431311..433104 (- strand) class=gene length=1794**

**>OleurPIP2;2a**

**ATG**ACGAAAGACGTTGAATCTCACGGGGAGCCGGCGGAATTCTCGGCCAAGGACTACCATGATCCACCACCGGCG  
CCGCTCATTGATTTTGAAGAGCTGAGCAGCTGGTTCATTTTACAGAGCACTTATTGCTGAGTTTCATTGCCACTTTA  
CTGTTCCCTCTACGTACAGTTTTGACTGTTATTGGATACAAAAGCCAGATTGACCCCGCTCACGGCGGCGGATCAG  
TGCGGCGGCGTTCGGGATTCTAGGCATTGCATGGGCTTTCGGTGGCATGATTTTCATTCTTGTCTACTGCACCGCC  
GGTATCTCTG**GT**CAGTTTTTAAAAGTCTTT**ACAAGCTTTTTCTTTATAGATTTTGATGAGTGACTTACTGGTGAA**  
**ATAAGTAACTTTTTGATAATGTGACAG**GAGGACACATTAACCCGGCTGTGACATTGGGGCTGTTCTTGGGACGAA  
AAGTGTCACCTGATCAGAGCAGTGATGTACATGGTAGCAGAGTGGTTGGGTGCAATCTGTGGTGTGGGTTTGGTGA  
AAGCATTTCCAAAAATCTTATTACAACCTGTACGGTGGTGAGCAAATGAGCTTGCTCCAGGTTACAACAAAGGTG  
TTGGATTGGGTGCTGAAATTATTGGCACATTTGTTTTGGTTTTACTGTCTTCTCAGCCACTGATCCTAAGAGGA  
ATGCCAGAGATTCCCATGTTCCCG**GTAAGCAATTTTTTTTTCTCTTCTAACC**CAAACTCTGGTAAAAATTTTTGGTTA  
**TAGTCTTGAAAATATTGATTTAAATCTTACATATATGAAG**GTGTTGGCTCCACTTCCCATTGGATTGCTGTTTT  
CATGGTTCACCTGGCCACCATCCCCATCACTGGAAGTGGCATCAACCCTGCTAGGAGCTTTGGAGCTGCT**GT**CAT

CTACAACAAAGACAAGCCCTGGGATGACCATGTATGCTCTTTTTTACTTCTTTAGGCCCTGTTTTGACGGTCTTT  
TTTTTTTTTTTTTGGAAAGAATGTATTTTTGAATAGTAACCTTTTTGGAGAATGCGTGATTAAAAAGTAAAAAATGT  
CTTGGGTTTATATGAATAATATTTTATTGTGAGAATGTATGCTCGAAAATGAATATGGGGAAAGTAGAGTAATGA  
AAGAATTACCGAAGAGGGGCTTATATAAATAATTATTTTCATGTCTTGTTTTCACTTGTTTATGAAGGGTAGATGT  
GTGGAATATTTGATAAAAAAGATAAACGAGGTTGTGTTGAATACATAATTTAAAGAAGTTTATCTGTTGTTTAACT  
AACTTGAACTTTTGGATAAGGTTTTTGAGACTAACATATGTTATTACTTTTTGTTTAAATAAATATGCAGTGGATT  
TTCTGGGTTGGGCCATTTATTGGAGCTGCCATTGCTGCATTCTACCACCAATACATTCTAAGGGCAGCAGCCATT  
AAGGCACTGGGATCTTTTCAGGAGCAATAAT**TAA**

**>OleurPIP2;2a**

**ATG**ACGAAAGACGTTGAATCTCACGGGGAGCCGGCGGAATTCTCGGCCAAGGACTACCATGATCCACCACCGGCG  
CCGCTCATTGATTTTGAAGAGCTGAGCAGCTGGTCATTTTACAGAGCACTTATTGCTGAGTTCATTGCCACTTTA  
CTGTTCCCTCTACGTCACAGTTTTGACTGTTATTGGATACAAAAGCCAGATTGACCCCGCTCACGGCGGCGATCAG  
TGCGGGCGGCGTCGGGATTCTAGGCATTGCATGGGCTTTTCGGTGGCATGATTTTCATTCTTGTTTACTGCACCGCC  
GGTATCTCTGGAGGACACATTAACCCGGCTGTGACATTTCGGGCTGTTCTTGGGACGAAAGGTGTCACCTGATCAGA  
GCAGTGATGTACATGGTAGCACAGTGTGTTGGGTGCAATCTGTGGTGTGGGTTTGGTGAAAAGCATTCCAAAAATCT  
TATTACAACCTGTACGGTGGTGGAGCAAATGAGCTTGCTCCAGGTTACAACAAAGGTGTTGGATTGGGTGCTGAA  
ATTATTGGCACATTTGTTTTGGTTTACACTGTCTTCTCAGCCACTGATCCTAAGAGGAATGCCAGAGATTCCCAT  
GTTCCCGTGTGGCTCCACTTCCCATTGGATTGCTGTTTTTCATGGTTCACCTGGCCACCATCCCCATCACTGGA  
ACTGGCATCAACCCTGCTAGGAGCTTTGGAGCTGCTTGGATTGTTCTGGGTTGGGCCATTTATTGGAGCTGCCATT  
GCTGCATTCTACCACCAATACATTCTAAGGGCAGCAGCCATTAAGGCACTGGGATCTTTTCAGGAGCAATAAT**TAA**

**>OleurPIP2;2a**

MTKDVESHGEPAEFSKDYHDPPPAPLIDFEELSSWSFYRALIAEFIATLLFLYVTVLTVIGYKSQIDPAHGGDQ  
CGVGILGIAWAFGGMIFILVYCTAGISGGHINPAVTFGLFLGRKVSILRAVMMVAQCLGAICGVGLVKAFQKS  
YYNLYGGGANELAPGYNKGVGLGAEIIGTFVLVYTVFSATDPKRNARDSHVPVLAPLPIGFAVFMVHLATIPITG  
TGINPARSFGAAWIFWVGPFIGAAIAAFYHQYILRAAAIKALGSFRSNN\*

## **OleurPIP2;2b Oleur061Scf6622g04008.1**

>Oleur061Scf8869:18552..20344 (- strand) class=gene length=1793

**>OleurPIP2;2b**

**ATG**ACGAAAGACGTTGAATCTCACGGGGAGCCGGCGGAATTCTCGGCCAAGGACTACCATGATCCACCACCGGCG  
CCGCTCATTGATTTTGAAGAGCTGAGCAGCTGGTCATTTTACAGAGCACTTATTGCTGAGTTCATTGCCACTTTA  
CTGTTCCCTCTACGTCACAGTTTTGACTGTTATTGGATACAAAAGCCAGATTGACCCCGCTCACGGCGGCGATCAG  
TGCGGGCGGCGTCGGGATTCTAGGCATTGCATGGGCTTTTCGGTGGCATGATTTTCATTCTTGTTTACTGCACCGCC  
GGTATCTCTG**GT**CAGTTTTTAAAAGTCTTTACAAGCTTTTTTCTTTATAGATTTTGATGAGTGACTTACTGGTGAA  
**ATAAGTAAC**TTTTTGATAATGTGACAGGAGGACACATTAACCCGGCTGTGACATTTCGGGCTGTTCTTGGGACGAA  
AGGTGTCACCTGATCAGAGCAGTGATGTACATGGTAGCACAGTGTGTTGGGTGCAATCTGTGGTGTGGGTTTGGTG  
AAGCATTCCAAAATCTTATTACAACCTGTACGGTGGTGGAGCAAATGAGCTTGCTCCAGGTTACAACAAAGGTG  
TTGGATTGGGTGCTGAAATTATTGGCACTTTTGTGTTTGGTTTACACTGTCTTCTCAGCCACTGATCCTAAGAGGA  
ATGCCAGAGATTCCCATGTTCCCG**TAAGCA**ATTTTTTCTCTTCTA**ACCCAA**ACTCTGGTAAAATTTTTGGTTATA  
**GTCTTG**AAAATATTGATTTAAATCTTACATATATGAAGGTGTTGGCTCCACTTCCCATTGGATTGCTGTTTTCA  
TGTTTACCTGGCCACCATCCCCATCACTGGA**ACTGG**CATCAACCCTGCTAGGAGCTTTGGAGCTGCT**GTCACT**  
**ACAACAA**AGACAAGCCCTGGGATGACCATGTATGCTCTTTTTTACTTCTTTAGGCCCTGTTTTGACGGTCTTTTT  
TTTTTTTTTTTTTGGAAAGAATGTATTTTTGAATAGTAACCTTTTTGGAGAATGCGTGATTAAAAAGTAAAAAATGTC  
TTGGGTTTATATGAATAATATTTTTATTGTGAGAATGTATGCTCGAAAATGAATATGGGGAAAGTAGAGTAATGAA  
AGAATTACCGAAGAGGGGCTTATATAAATAATTATTTTCATGTCTTGTTTTCACTTGTTTATGAAGGGTAGATGTG  
TGGAATATTTGATAAAAAAGATAAACGAGGTTGTGTTGAATACATAATTTAAAGAAGTTTATCTGTGCTTTAACT  
**ACTTGA**ACTTTTTGGATAAGGTTTTTGAGACTAACATATGTTATTACTTTTTGTTTAAATAAATATGCAGTGGATT  
TCTGGGTTGGGCCATTTATTGGAGCTGCCATTGCTGCATTCTACCACCAATACATTCTAAGGGCAGCAGCCATTA  
AGGCACTGGGATCTTTTCAGGAGCAATAAT**TAA**

**>OleurPIP2;2b**

**ATG**ACGAAAGACGTTGAATCTCACGGGGAGCCGGCGGAATTCTCGGCCAAGGACTACCATGATCCACCACCGGCG  
CCGCTCATTGATTTTGAAGAGCTGAGCAGCTGGTCATTTTACAGAGCACTTATTGCTGAGTTCATTGCCACTTTA  
CTGTTCCCTCTACGTCACAGTTTTGACTGTTATTGGATACAAAAGCCAGATTGACCCCGCTCACGGCGGCGATCAG  
TGCGGGCGGCGTCGGGATTCTAGGCATTGCATGGGCTTTTCGGTGGCATGATTTTCATTCTTGTTTACTGCACCGCC  
GGTATCTCTGGAGGACACATTAACCCGGCTGTGACATTCGGGCTGTTCTTGGGACGAAAGGTGTCACCTGATCAGA  
GCAGTGATGTACATGGTAGCACAGTGTGTTGGGTGCAATCTGTGGTGTGGGTTTGGTGAAAAGCATTCCAAAAATCT  
TATTACAACCTGTACGGTGGTGGAGCAAATGAGCTTGCTCCAGGTTACAACAAAGGTGTTGGATTGGGTGCTGAA  
ATTATTGGCACTTTTGTGTTTGGTTTACACTGTCTTCTCAGCCACTGATCCTAAGAGGAATGCCAGAGATTCCCAT  
GTTCCCGTGTGGCTCCACTTCCCATTGGATTGCTGTTTTTCATGGTTCACCTGGCCACCATCCCCATCACTGGA

ACTGGCATCAACCCTGCTAGGAGCTTTGGAGCTGCTTGGATTTTCTGGGTTGGGCCATTTATTGGAGCTGCCATT  
GCTGCATTCTACCACCAATACATTCTAAGGGCAGCAGCCATTAAGGCACTGGGATCTTTCAGGAGCAATAAT**TAA**

**>OleurPIP2;2b**

MTKDVESHGEPAEFSKADYHDPPPAPLIDFEELSSWSFYRALIAEFIATLLFLYVTVLTVIGYKSQIDPAHGGDQ  
CGGVGILGIAWAFGGMIFILVYCTAGISGGHINPAVTFGLFLGRKVSLIRAVMYMVAQCLGAICGVGLVKAFQKS  
YYNLYGGGANELAPGYNKGVGLGAEIIGTFVLVYTVFSATDPKRNARDSHVPVLAPLPIGFAVFMVHLATIPITG  
TGINPARSFGAAWIFWVGPFIGAIAAFYHQYILRAAAIKALGSFRSNN\*

**OleurPIP2;3 Oleur061Scf0690g01039.1**

>Oleur061Scf0690:166917..168873 (- strand) class=gene length=1957

**>OleurPIP2;3a**

**ATG**TAAAAGATGGTGGAGTGGCTGAGCATGGATCATTCACAGTCAAAGACTACCACGATCCACCACCGGCGCCG  
TTGATTGATGCGGCGGAGCTTACAAAGTGGTCATTTTACAGAGCTATTATAGCTGAGTTTATAGCCACCTTGCTT  
TTCCTTTACATTACGGTTTTGACTGTGATAGGGTACAAGAGCCAGACTGATACCAACGCCGCCACGGCGGTGAT  
CAGTGCGGTGGCGTTGGAGTTCTTGGTATTGCATGGGCCTTTGGTGGCATGATCTTCGTTCTTGCTACTGCACT  
GCTGGAATTTCCGGT**GAGCTTTGTTTTATATAAAATTATGGATCAGAAAACAAGTTTATATATATATTGATTAAA**  
**TGGTTTTATCATCATGTGCAGGGGGGCACATTAATCCAGCAGTGACATTCGGGCTTTTCTTGGCCCGGAAGGTGTC**  
GATGATCAGAGCCATTATGTATATGGTGGCTCAGTGTTTGGGGGCCATTTGTGGCGTCGGACTGGTGAAGGCATT  
CCAGAAAGCATATTACAAGAAGTACGGCGGCGGCCAATGAACCTCGCAGACGGCTACAGCACCGGCGTGGGATT  
GTCGGCTGAGATCATCTCGGAACATTCTGTTCTTGTTTACACAGTTTTCTCAGCCACCGATCCCAAGAGAAGTGCCAG  
GGATTTCCCATGTTCCT**GTGAGTTGCACATATAACAATCCCCATCTTTTTTTCTTCTGAGAAGTGCATGTTTGGTT**  
**AAGTTATAAGGCTTACTTATAAGGAATAAGTATTTAGAAAAATTGGATCCATGAAATAAATAAATATTTCGAAA**  
**ACAAAGAAAGCACCTACTAGTGATAAGTACAAGTTAAAATTACTTTAAACTTGACTTTGTTTCGACTTCAAAAATTG**  
**ATCCTAAACTCTTTACTTGAGTTTGAGCCCGGCTAGAATTCAGTGGTTTTATCTTTATGAAACGATTTCGATATTG**  
**ACACTACTTGAATCTGGACTTGAATCTCAG**TTTTTGGCACCTCTCCCAATTGGATTTCAGTTTTTCATGGTTCAC  
TTGGCAACCATCCCAATCACTGGTACTGGCATCAACCCTGCTAGAAGTTTTGGAGCTGCAGTAATCTACAACCAG  
GAAAAGGCTTGGGATGACCAG**GT**TAGCATTTTTTGGAAAGTAATTATGAATTAGAGTTGACTATATGAATCGTGTT  
TTGCACCATTTAATTCACCTTTGCTGCTAATTATACTCGAAGAGCCCTCATGCAATGATTAGTAGGATTTGTGTCA  
TAAGATGTGATTAAATTTCAAGTTCAATGTCAATATTCTACCTCAACCCTTCGGGTTTTTATCTAAACATGTGAC  
AAGATCCCTTTTTTTTTTCTTTTTTCTTTTTTCTTTTTTTTTTCTTTTTTTAAGTCTAAACATGAGACGAGCTA  
CGAAAAACATGAGTTACATCCCTGCATTTACATTGAAAAACACCTACAATCACAAGTAATAATTTATGTATAC  
TTTTGTCTCTT**CAG**TGGATCTTCTGGGTAGGACCCTTCATTGGTGCAGCCATTGCAGCCTTCTACCACCAGTTT  
ATTTTGAGAGCGGAGCAGCTAAAGCTCTTGGTTCATTTCAGAAGCAGCTACCATGTT**TGA**

**>OleurPIP2;3a**

**ATG**TAAAAGATGGTGGAGTGGCTGAGCATGGATCATTCACAGTCAAAGACTACCACGATCCACCACCGGCGCCG  
TTGATTGATGCGGCGGAGCTTACAAAGTGGTCATTTTACAGAGCTATTATAGCTGAGTTTATAGCCACCTTGCTT  
TTCCTTTACATTACGGTTTTGACTGTGATAGGGTACAAGAGCCAGACTGATACCAACGCCGCCACGGCGGTGAT  
CAGTGCGGTGGCGTTGGAGTTCTTGGTATTGCATGGGCCTTTGGTGGCATGATCTTCGTTCTTGCTACTGCACT  
GCTGGAATTTCCGGGGGGGCACATTAATCCAGCAGTGACATTCGGGCTTTTCTTGGCCCGGAAGGTGTCGATGATC  
AGAGCCATTATGTATATGGTGGCTCAGTGTTTGGGGGCCATTTGTGGCGTCGGACTGGTGAAGGCATTCCAGAAA  
GCATATTACAAGAAGTACGGCGGCGGCCAATGAACCTCGCAGACGGCTACAGCACCGGCGTGGGATTGTCCGGCT  
GAGATCATCGGAACATTCTGTTCTTGTTTACACAGTTTTCTCAGCCACCGATCCCAAGAGAAGTGCCAGGGATTCC  
CATGTTCTCTTTTTGGCACCTCTCCCAATTGGATTTCAGTTTTTCATGGTTCATTGGCAACCATCCCAATCACT  
GGTACTGGCATCAACCCTGCTAGAAGTTTTGGAGCTGCAGTAATCTACAACCAGGAAAAGGCTTGGGATGACCAG  
TGGATCTTCTGGGTAGGACCCTTCATTGGTGCAGCCATTGCAGCCTTCTACCACCAGTTTATTTTGAGAGCGGGA  
GCAGCTAAAGCTCTTGGTTCATTTCAGAAGCAGCTACCATGTT**TGA**

**>OleurPIP2;3a**

MVKDGGVAEHGSFTVKDYHDPPPAPLIDAAELTKWSFYRAIIAEFIATLLFLYITVLTIVIGYKSQTDNAGHGGD  
QCGGVGLGIAWAFGGMIFVLVYCTAGISGGHINPAVTFGLFLARKVSMIRAIMYMVAQCLGAICGVGLVKAFQK  
AAYKKYGGGANELADGYSTGVGLSAEIIIGTFVLVYTVFSATDPKRSARDSHVPVLAPLPIGFAVFMVHLATIPIT  
GTGINPARSFGAAVIYNQEKAWDDQWIFWVGPFIGAIAAFYHQFILRAGAALKALGSFRSSYHV\*

**OleurPIP2;3b Oleur061Scf8232g00023.1**

>Oleur061Scf8232:53550..55667 (+ strand) class=gene length=2118

**>OleurPIP2;3b**

**ATG**GTAAAAGATGGTGGAGTGGCTGAGCATGGATCATTACGGTCAAAGACTACCACGATCCACCACCGGCGCCG  
TTGATTGATGCGGCAGAGCTTACAAAGTGGTCATTTTACAGAGCTGTTATAGCTGAGTTTATAGCCACCTTGCTT  
TTCCTTTACATTACGGTTTTGACTGTGATAGGGTACAAGAGCCAGACTGATACCAACGCCGGCCACGGCGGTGAT  
CAGTGCGGTGGTGTGGAATTCTTGGTATTGCATGGGCCTTTGGTGGCATGATCTTCGTTCTTGTCTACTGCACT  
GCTGGAATTTCCG**GTGAGTTTTGTTTTATATAAAATTATGGATCAGAAAACAAGTTTATATATATATATATATAT**  
**TGATTAATGGTATATCATCATGTGCAGGGGGACATATTAATCCAGCAGTGACATTCGGGCTTTTCTTGCCCCG**  
AAGGTGTCGATGATCAGAGCCATTATGTATATGGTGGCTCAGTGTTTGGGGGCCATTTGTGGCGTCGGACTGGTG  
AAGGCATTCCAGAAAGCATATTACAAGAAGTACGGCGGCGGCCAATGAACTCGCAGACGGCTACAGCACTGGC  
GTGGGATTGTGCGCGGAGATCATCGGAACATTTCGTTCTTGTTTACACAGTTTTCTCAGCCACCGATCCCAAGAGA  
AGTGCCAGGGATTCCCATTGTTCT**GTGAGTTGCACATATACAATTCCCCATCTTTTTTCTTCTGAGAAGTAAAT**  
**GTTTCGGTTAAGTTATTTAAGTATTAGAAAAATTGGATCCATGAAATAACTTAAATTTTTCGAAAACAAAGAAATC**  
**ACTTACTAGTGATAAGCATAAGTTAAATTACTTTAAAGTTGACTTTGTTTCGACTTCAAATTTGATCCTAATACA**  
**CTTAAGTGAGTTTGAGCCCGCTAGAATTCAGTGGTTTTATCTTTATGAAACGATTCGATATTGACACTACTTGA**  
**ATCTCAGGTTTTTGGCACCTCTCCCAATTGGATTTGCAGTTTTTCATGGTTCACTTGGCAACCATCCCAATCACTGG**  
TACTGGCATCAACCCTGCTAGAAGTTTTGGAGCTGCAGTAATCTACAACCAGGAAAAGGCTTGGGATGACCAG**GT**  
**TAGCATTTTTTGGAAAGTAATTATGAATTAGAGTTGACTATATGAGTCGTGTTTTGCACCATTTAATTCACTTTAC**  
**TGCTAATTATATCTGAAGAGTTCTCATGCAATGATTAGTAGGATTTGTGTCTATAAGATGTGATTAAATTTCAAGT**  
**TCAATGTCACTATTTCTACCTCAACCTTCGGGTTTTTATCTAAACATGAGTCGAGCCATGAAAAAACACGAGTT**  
**ACAATCCTTTTTTTAGGGCTTCTTTTTTTTTTTTTTGGATTTTGTCTACTGTACATAAAAAATGTACATAATGAAT**  
**TACAAATTATGATTTGAATGGAAATGATTGGATGAAAAAGTTGATTATATTTTAAACTAACAAATGACAGAATGC**  
**CATGTTACATTATGTAAATCTTAATATACATAAAGTCTAAACATGAGACGAGCTACGAAAAAACATGAGTTACAT**  
**CCCCGCATTTACATTGAAAAAACACCCACAATCACAAGCAATAATTTATGTATACTTTTGTCTCCTTCAGTGGAT**  
CTTCTGGGTAGGACCCTTCATTGGTGCAGCCATTGCAGCCTTCTACCACCAGTTTATTTTGAGGGCGGGAGCAGT  
TAAAGCTCTTGGTTCATTTCAGAAGCAGCTACCATGTT**TGA**

**>OleurPIP2;3b**

**ATG**GTAAAAGATGGTGGAGTGGCTGAGCATGGATCATTACGGTCAAAGACTACCACGATCCACCACCGGCGCCG  
TTGATTGATGCGGCAGAGCTTACAAAGTGGTCATTTTACAGAGCTGTTATAGCTGAGTTTATAGCCACCTTGCTT  
TTCCTTTACATTACGGTTTTGACTGTGATAGGGTACAAGAGCCAGACTGATACCAACGCCGGCCACGGCGGTGAT  
CAGTGCGGTGGTGTGGAATTCTTGGTATTGCATGGGCCTTTGGTGGCATGATCTTCGTTCTTGTCTACTGCACT  
GCTGGAATTTCCGGGGGACATATTAATCCAGCAGTGACATTCGGGCTTTTCTTGCCCCGAAGGTGTGATGATC  
AGAGCCATTATGTATATGGTGGCTCAGTGTTTGGGGGCCATTTGTGGCGTCGGACTGGTGAAGGCATTCCAGAAA  
GCATATTACAAGAAGTACGGCGGCGGCCAATGAACTCGCAGACGGCTACAGCACTGGCGTGGGATTGTGCGCG  
GAGATCATCGGAACATTTCGTTCTTGTTTACACAGTTTTCTCAGCCACCGATCCCAAGAGAAAGTGCCAGGGATTCC  
CATGTTCTCTGTTTTTGGCACCTCTCCCAATTGGATTTGCAGTTTTTCATGGTTCACTTGGCAACCATCCCAATCACT  
GGTACTGGCATCAACCCTGCTAGAAGTTTTGGAGCTGCAGTAATCTACAACCAGGAAAAGGCTTGGGATGACCAG  
TGGATCTTCTGGGTAGGACCCTTCATTGGTGCAGCCATTGCAGCCTTCTACCACCAGTTTATTTTGAGGGCGGGA  
GCAGTTAAAGCTCTTGGTTCATTTCAGAAGCAGCTACCATGTT**TGA**

**>OleurPIP2;3b**

MVKDGGVAEHGSFTVKDYHDPPLIDAAELTKWSFYRAVIAEFIATLLFLYITVLTVIGYKSQTDNAGHGGD  
QCGGVGILGIAWAFGGMIFVLVYCTAGISGGHINPAVTFGLFLARKVSMIRAIMYMVAQCLGAICGVGLVKAFQK  
AYYKKYGGGANELADGYSTGVGLSAEIIIGTFVLVYTVFSATDPKRSARDSHVPVLAPLPIGFAVFMVHLATIPIT  
GTGINPARSFGAAVIYNQEKAWDDQWIFWVGPFIGAAIAAFYHQFILRAGAVKALGSFRSSYHV\*

## **OleurPIP2;4 Oleur061Scf0101g01002.1**

>Oleur061Scf0101:84671..86479 (- strand) class=gene length=1809

**>OleurPIP2;4**

**ATG**GCAAAGGACGCTGGAGTGGCGGAGCATGGATCGTTTCGCGGCAAAGGACTACCAAGATCCACCACCAGCTCCG  
CTGATTGACGCGGAGGAGCTTACAAAGTGGTCATTTTACAGAGCTGTTATAGCCGAGTTTATAGCCACCTTGCTC  
TTCCTTTACATTACGGTTTTGACTGTGATTGGGTACAAGAGCCAGATTGATACCACGGTTGGCCACGGCGGTGAT  
CAGTGCGGTGGCGTTGGAATTCTTGGTATTGCATGGGCCTTTGGTGGAAATGATCTTCGTTCTTGTCTACTGCACC  
GCTGGAATTTCCG**GTGAGTTTTGTTTTATTTCGCACACAGATACATGCATACATGTATGGTTTGATTTTAATGGCAT**  
**TTCTCATGTTCATGTTCATGTGCATCTCAGGGGGACACATTAATCCAGCAGTGACATTCGGGCTTTTCTTGCCCCGA**  
AAGGTGTCAATGATCAGAGCCATTATGTATATGGTGGCTCAGTGCTTGGGGGCCATTTGTGGCGTCGCGCTGGTG  
AAGCGCTTACAGAATCACACTATAAGAAATATGGCGCGCGGTAAATGAGCTCGCCGATGGCTACAGACCGGC  
GTCGGATTATCCGCGGAGATAAATCGGAACATTTCGTCCTTGTTTACACAGTTTTCTCTGCCACTGATCCCAAGAGA  
AGTGCCAGGGATTCCCATTGTCCTGTAAGTTGACATGTACAATTCTCTATTTTTTTTTCTTTTGAGAAGTGCATGT  
TTGTTAACCTTAAAAAATTTACTTATAATTGAATAAGTATTAAAAATAATTTTTTTGGGGGTCCAAGTAGAAAAATA  
ACTTATTTAGTAGCTTTACTGACAATATTACTTAAAAGTAATTTAATATTGACAATTTTTTGCATTTGGACTTGAA  
TCTTAGGTATTGGCACCTCTTCCAATTGGATTTGCAGTTTTTCATGGTTCAATTTGGCCACCATCCCCATCACTGGT

ACTGGTATCAACCCTGCTAGGAGTTTATAGGGGCTGCAGTGATCTACAACCAGGAAAAAGCTTGGGATGATCAGGTT  
AGCATTTTTTCCCAATGTATTATAAATTAGATTTAACTATAGGAATAATGTTTTGCGCCATTTCAATTCACCTTTATT  
TATTGCTAATTTCTTCTCGAAGAGCCCCGATAAATTTCAAGTTCATTGTCAACATACCAGCTCTCATGTTTTTATG  
AATTTTTTTGAATTATGAGAGCCTAGTCAAAAAGTATCGTTCAACTCATGTTATAAGAAGTGACTTCGTGTCAACC  
TCCTTTCTTTATTTGAACTTGAGACTGACTATAAACAGAAATAGCAAAAAGTTATATTTCAAAAAGCTCTAAATAT  
TATAGTTTTCAATTATAGCCCCACCCAAAGTCACTAGTAGTAATTTATCTGTTTACTTTTCGTGTCTCTCAGTGGA  
TCTTCTGGGTTGGACCCCTTCTTTGGTGCAGCCATTGCAGCCTTCTACCACCAGTTTATTTTGAGAGCAGGAGCAG  
CTAAAGCCCTTGTTTCATTTCAGAAGCAGCTCCCATGTTTAA

>OleurPIP2;4

ATGGCAAAGGACGCTGGAGTGGCGGAGCATGGATCGTTCGCGGCAAAGGACTACCAAGATCCACCACCAGCTCCG  
CTGATTGACGCGGAGGAGCTTACAAAGTGGTCATTTTACAGAGCTGTTATAGCCGAGTTTATAGCCACCTTGCTC  
TTCCTTTACATTACGGTTTTGACTGTGATTGGGTACAAGAGCCAGATTGATACCACGGTTGGCCACGGCGGTGAT  
CAGTGCGGTGGCGTTGGAATTTCTTGGTATTGCATGGGCCTTTGGTGAATGATCTTCGTTCTGTCTACTGCACC  
GCTGGAATTTCCGGGGGACACATTAATCCAGCAGTGACATTCCGGGCTTTTCTTGGCCCCGAAAGGTGTCAATGATC  
AGAGCCATTATGTATATGGTGGCTCAGTGCTTGGGGGCCATTTGTGGCGTCGCGCTGGTGAAGGCGTTACAGAAG  
TCACACTATAAGAAATATGGCGGCGGCGTAAATGAGCTCGCCGATGGCTACAGCACCGGCGTCGGATTATCCGCG  
GAGATAATCGGAACATTTCGTCTTGTTTACACAGTTTCTCTGCCACTGATCCCAAGAGAATTTTCATGGTTCAT  
TTGGCCACCATCCCCATCACTGGTACTGGTATCAACCCTGCTAGGAGTTTATAGGGGCTGCAGTGATCTACAACCAG  
GAAAAAGCTTGGGATGATCAGTGGATCTTCTGGGTGGACCCTTCTTTGGTGCAGCCATTGCAGCCTTCTACCAC  
CAGTTTATTTTGAGAGCAGGAGCAGCTAAAGCCCTTGTTTCATTTCAGAAGCAGCTCCCATGTTTAA

>OleurPIP2;4

MAKDAGVAEHGSFAAKDYQDPPAPPLIDAEELTKWSFYRAVIAEFIATLLFLYITVLTIVIGYKSQIDTTVGHGGD  
QCGGVGILGIAWAFGGMIFVLVYCTAGISGGHINPAVTFGLFLARKVSMIRAIMYMVAQCLGAICGVALVKALQK  
SHYKKYGGGVNELADGYSTGVGLSAEIIIGTFVLVYTVFSATDPKRIFMVHLATIPITGTGINPARSLGAAVIYNQ  
EKAWDDQWIFWVGPFFGAAIAAFYHQFILRAGAAKALGSFRSSSHV\*

## OleurPIP2;5 Oleur061Scf3195g08011.1 Corrected

>Oleur061Scf3195:828028..829785 (+ strand) class=gene length=1758

>OleurPIP2;5

ATGGGCAAGGACATTGAGGTTGGCGCCGAATACACCACCAAGGACTACCAAGATCCGCCACCGGCTCCGCTGATT  
GACCCGGAGGAGCTAACCAAGTGGTCGTTCTACAGGGCCATTATAGCTGAATTCATCGCCACGCTCTTGTTCCTG  
TACATAACTGTTCTGACTGTGATTGGGTACAAGAGCGAAAGCGCCGCCGATAAATGCGGGCGGCTCGGGATTCTT  
GGCATAGCTTGGGCTTTTTGGTGGCATGATTTTTGTCTCGTTTACTGCACTGCTGGCATTTCCGGTAAGTACCTT  
AATGTCTAGACTTCGACCGACTAAATTCCATTTAGAGGGAGCTAGAAATTTTGTACATGTACGAATACTCAATA  
TAATTCCAATGGGTGCAGGAGGGCACATCAACCCGGCAGTGACATTAGGCCTATTCTTGGCCCGTAAGGTGTCAC  
TGTTTCGGGCTATCATGTACATGGTGGCGCAATGTTTAGGTGCCATTTGCGGTTGCGGCTTGGTAAAGGCATTCC  
AGAAGTCTTACTATGTAAATTCGGCGGCGGTGCCAATGAAGTGGCGGATGGGTACAGTAACGGCACCGGATTGG  
CGGCGGAGATCATTGGCACATTCGTCCTTGTTTACACCGTATTCTCTGCCACTGACCCCAAGAGAAATGCTAGAG  
ACTCCCACGTCCCTGTAAGTGCATTTGACTCCCTAGTTTCTTCCATTTTTTATACGGACTTGTTAAAAATCCCGG  
TTCGACTCGGCCGGGTATGAATGAAAGGCTGACTCTGACGGACCCTGTTGACACCCCTATCTAGGTCAAGAATTT  
GTTTCCTCTGTTTCGTGTTGATTAATCCTAATTGAAATTTTTGACAGGTTTTGGCACCTCTTCCAATTGGATTGTC  
AGTGTTCATGGTTTCATTTAGCCACAATCCCAATTACCGGCACGGGTATCAACCCGGCCCGAAGTTTAGGAGCTGC  
TGTTATCTATGGCAAAGACAAGGCCTGGGATGATCAAGTACGCAATTATTTCAATGTTTTACAATTTGTACCTTAT  
TTCCAGGAAAAAAAATTAACGTTAATTCTCATATATTTTGCAAGTGGATTTTCTGGGTGGGACCATTTCATTGGGG  
CAGCCATTGCTGCATTTTACTACCAGTATATTCTGAGGGCAGGAGCTGTAAAAGCTCTGGGATCATTTCAGGAGCA  
CTGCTCATTGA

>OleurPIP2;5

ATGGGCAAGGACATTGAGGTTGGCGCCGAATACACCACCAAGGACTACCAAGATCCGCCACCGGCTCCGCTGATT  
GACCCGGAGGAGCTAACCAAGTGGTCGTTCTACAGGGCCATTATAGCTGAATTCATCGCCACGCTCTTGTTCCTG  
TACATAACTGTTCTGACTGTGATTGGGTACAAGAGCGAAAGCGCCGCCGATAAATGCGGGCGGCTCGGGATTCTT  
GGCATAGCTTGGGCTTTTTGGTGGCATGATTTTTGTCTCGTTTACTGCACTGCTGGCATTTCCGGAGGGCACATC  
AACCCGGCAGTGACATTAGGCCTATTCTTGGCCCGTAAGGTGTCACTGGTTTCGGGCTATCATGTACATGGTGGCG  
CAATGTTTAGGTGCCATTTGCGGTTGCGGCTTGGTAAAGGCATTCCAGAAGTCTTACTATGTAAATTCGGCGGC  
GGTGCCAATGAACATGGCGGATGGGTACAGTAACGGCACCGGATTGGCGGCGGAGATCATTGGCACATTCGTCCTT  
GTTTACACCGTATTCTCTGCCACTGACCCCAAGAGAAATGCTAGAGACTCCCACGTCCCTGTTTGGCACCTCTT  
CCAATTGGATTTGCAAGTGGTTCATGTTTCATTTAGCCACAATCCCAATTACCGGCACGGGTATCAACCCGGCCCGA  
AGTTTAGGAGCTGCTGTTATCTATGGCAAAGACAAGGCCTGGGATGATCAATGGATTTTCTGGGTGGGACCATTTC  
ATTGGGGCAGCCATTGCTGCATTTTACTACCAGTATATTCTGAGGGCAGGAGCTGTAAAAGCTCTGGGATCATTC  
AGGAGCACTGCTCATTGA

>OleurPIP2;5



MGKDIEVGAEYTTTKDYQDPPAPLIDPEELTKWSFYRAIIAEFIATLLFLYITVLTVIGYKSESAADKCGGVGIL  
GIAWAFGGMIFVLVYCTAGISGGHINPAVTLGLFLARKVSLVRAIMYMVAQCLGAICGGLVKAFQKSYVVKFGG  
GANELADGYSNGTGLAAEIIIGTFVLVYTVFSATDPKRNARDSHVPVLAPLPIGFAVFMVHLATIPITGTGINPAR  
SLGAAVIYGKDKAWDDQWIFWVGPFIGAIIAAFYQYILRAGAVKALGSFRSTAH\*

### **OleurPIP2;6a Oleur061Scf3195g08011.1**

>Oleur061Scf0106:611096..613917 (- strand) class=gene length=2822

#### **>OleurPIP2;6a**

**ATG**ACAAAGGACGCAGGTGTGGCGGAGCACGGGTCGTTACGACCAAGGACTACCATGATCCGCCTCCGGCGCCA  
CTCATCGACGCGGAGGAGCTGACAAAATGGTCATTTTACAGGGCTATAATAGCTGAGTTCATAGCCACTTTGCTG  
TTTCTTTACATTACAGTTTTGACTGTAATTGGGTACAAGAGCCAGACTGATCCCGACTTGAAGGGTGACCAGTGT  
GATGGGGTTGGAATTCTTGGTATTGCATGGGCCTTTGGTGGCATGATCTTCATTCTGGTTTACTGCACTGCTGGA  
ATTTCTG**GT**CAGTTTTATTTTGTGGAGACTCGAGATTCCATCTTAAGAGTTAATTTTTTTGTACTATTTTCATA  
TGTAACCATTTTTGATTTACCCTTTAACATGATCAGCAAGATGGTGGCTTATGTGCCACAATTAATCTTGATATCT  
GACATGATAAAGTTACATGCTCAATTAATTTGTCCAATAAAAAATGGTGTAATTTGAGTGATCTGTGTGCATGCAG  
GGGGGCACATAAACCCAGCAGTGACCTTTGGCCTGTTCTTGGCCCCGAAAGTGCTTTTGATCCGAGCAGTGATGT  
ACATGGTGGCACAGTGTTTGGGAGCCATCTGCGGCGTGGTGGTAAAGGCATTTTCAGAAATCATACTACAAGA  
AATACGGTGGCGGTGCCAACGTGCTGGCCGATGGGATCAGCACCGGCGTCGGGTTAGCTGCCGAAATCATCGGAA  
CATTTCGTCCTTGTTTACACTGTTTTCTCCGCCACTGATCCAAAGCGTAGTGCCAGAGATTCTCACGTCCCT**GTAA**  
GTTTTCTAGT**AG**CTTAATTTTTCTCTCAAGTGATTAAGCCTTGGAAATATGTGATTAAAAATTAATTTGTTGACTTAAC  
TTAAATCTAACTTAATATAGATTTAAATCCCTTTGAGTTTATTATAATTAGATGAGTAAAGATGTATCCCTTTT  
TTGCTGTCTCGATTCAAGTTCGGTAAAGATTAGTAGTAGGGGTGAGCAGGGGCAGACCTACTTGAGACCCAGCGG  
GTCGGCAGCCCCACTCGATTTTTCAGATTTTGTAGTTTCTCCAAGTTTTGTAGGTTTTCAATTTTTTCCAC  
GGTGTTTTGTCTTTTGTCCCCACTGCACCTCCGTCCTGAGTCCACCATTGAATGTGAGCCATACCAAATTGCAAT  
ATGCTGTACAACCTGGGGCACTTGCCAGTATTATGTGGTTGTAAGTGAAATGAAGAAATTAATGTACCAAAGGGGA  
CTTTACCTTGGTGACAGATGCAATGAATCAAGAAAAGTACAAGAGATATTATAATATTGGTTAACTAATTCGTT  
ATGGACCATGAACTTTGGATTATACGACTTTGTGAGAACGATTTTGACCGATGCAGTGAAAGAAGTATTGGTTA  
CGGCAGATGATTTGATGAGAAAGTTGATCGTATTTTAAAAAATTTAATGATAGAAAATTATATGGTATTATGTCA  
ACCTGTCAACATATCTAGCACTATAACACCATTGTAAAATCTTACCTTGGGGACATGGATTTCGTAGATTAGATAG  
CAATATTAGTAGAAAACCTTTTGTGGGCCCTATTAGAATAAAAAAATTCACGCTTGTGGGGGATATCGTGTGA  
TATACAACAGTAGACAATGATACATGAATTTTGTCAAACGACCTGCACCGTTCCTACACCGATGATTGCACCCCT  
CACATGATGCATTGGTCCCACCTGAATAAAAAAATGTGACGCCATGTGTATGTGTGTGTGGTCACTTGCGCG  
GGTCGTGTAGCGTGGTCCATGATACATTAGCGGATAAATTTTTTACCAAAAAAAGAAAAAATTTCT  
TCTATAGTGATGTCCATTAATGTATTTAAATTCAACATACTAATTATGCCGAAGCCATTATTATTTCGAAAAATAC  
**TAGG**TATTGGCACCTCTTCCAATTGGATTTGCAGTGTTTCATGGTTTCATTTGGCCACCATTCCAATCACCGGAACG  
GGCATCAACCCAGCTCGGAGTCTCGGAGCCGCAGTAATCTACGACCAGCACGAGGCTTGGGACGATCAC**GTTAGT**  
**AC**ATATATTCCAAATTGAATTTAATTACTTTTCATAAAACGTATACTATAACGAAAATTTCTGTCTTGAAAAGGT  
**CT**TTTGATGACCCATAATTGGTGCTATTTAATCTAATAATTACATGTATATGTTTTT**CAG**TGGATTTTCTGGGT  
CGGACCGTTTTATCGGTGCAGCCGTTGCAGCATTCTACCACCAGTTTATATTGAGAGCTGGAGCAGCAAAGGCCCT  
TGGTTTCATTACAGGAGTAGTGCTTCTCATCAT**TGA**

#### **>OleurPIP2;6a**

**ATG**ACAAAGGACGCAGGTGTGGCGGAGCACGGGTCGTTACGACCAAGGACTACCATGATCCGCCTCCGGCGCCA  
CTCATCGACGCGGAGGAGCTGACAAAATGGTCATTTTACAGGGCTATAATAGCTGAGTTCATAGCCACTTTGCTG  
TTTCTTTACATTACAGTTTTGACTGTAATTGGGTACAAGAGCCAGACTGATCCCGACTTGAAGGGTGACCAGTGT  
GATGGGGTTGGAATTCTTGGTATTGCATGGGCCTTTGGTGGCATGATCTTCATTCTGGTTTACTGCACTGCTGGA  
ATTTCTGGGGGGCACATAAACCCAGCAGTGACCTTTGGCCTGTTCTTGGCCCCGAAAGTGCTTTTGATCCGAGCA  
GTGATGTACATGGTGGCACAGTGTTTGGGAGCCATCTGCGGCGTGGTGGTTAAGGCATTTTCAGAAATCATAC  
TACAAGAAATACGGTGGCGGTGCCAACGTGCTGGCCGATGGGATCAGCACCGGCGTCGGGTTAGCTGCCGAAATC  
ATCGGAACATTTCGTCCTTGTTTACACTGTTTTCTCCGCCACTGATCCAAAGCGTAGTGCCAGAGATTCTCACGTC  
CCTGTATTGGCACCTCTTCCAATTGGATTTGCAGTGTTTCATGGTTTCATTTGGCCACCATTCCAATCACCGGAACG  
GGCATCAACCCAGCTCGGAGTCTCGGAGCCGCAGTAATCTACGACCAGCACGAGGCTTGGGACGATCACTGGATT  
TTCTGGGTTCGGACCGTTTTATCGGTGCAGCCGTTGCAGCATTCTACCACCAGTTTATATTGAGAGCTGGAGCAGCA  
AAGGCCCTTGGTTTCATTACAGGAGTAGTGCTTCTCATCAT**TGA**

#### **>OleurPIP2;6a**

MTKDAGVAEHGSFTTKDYHDPAPLIDAEELTKWSFYRAIIAEFIATLLFLYITVLTVIGYKSQTDPLKGDQC  
DVGILGIAWAFGGMIFILVYCTAGISGGHINPAVTFGLFLARKVSLIRAVMYMVAQCLGAICGVGLVKAFQKSY  
YKKYGGGANVLADGISTGVGLAAEIIIGTFVLVYTVFSATDPKRSARDSHVPVLAPLPIGFAVFMVHLATIPITGT  
GINPARSLGAAVIYDQHEAWDDHWIFWVGPFIGAAVAAYFHQFILRAGAAKALGSFRSSASHH\*

## **OleurPIP2;6b Oleur061Scf0638g02012.1**

>Oleur061Scf0638:213705..216526 (- strand) class=gene length=2822

### **>OleurPIP2;6b**

ATGACAAAGGACGCAGGTGTGGCGGAGCACGGGTTCGTTACGACCAAGGACTACCATGATCCGCCTCCGGCGCCG  
CTCATCGACGCGGAGGAGCTGACAAAATGGTCATTTTACAGGGCTATAATAGCTGAGTTCATAGCCACTTTGCTG  
TTTCTTTACATTACAGTTTTGACTGTAATTGGGTACAAGAGCCAGACTGATCCCGACTTGAAGGGTGACCAGTGT  
GATGGGGTTGGAATTCTTGGTATTGCATGGGCCTTTGGTGGCATGATCTTCATTCTGGTTTACTGCACTGCTGGA  
ATTTCTGAGTCAGTTTTATTTTGTGAGACTCGAGATTCCATCTTAAGAGTTAATTTTTTGTACTATTTTCATA  
TGTAACCATTTTGATTTACCCTTTAACATGATCAGCAAGATGGTGGCTTATGTGCCACAATTAATCTTGATATCT  
GACATGATAAAGTTACATGCTCAATTAATTTTCCAATAAAAAATGGTGTAAATTTGAGTGATCTGTGTGCATGCAG  
GGGGGCACATAAAGCCAGCAGTGACCTTTGGCCTGTTCTTGGCCCGAAAGTGTCTTTGATCCGGGCAGTGATGT  
ACATGGTGGCACAGTGTGTTGGGAGCCATCTGCGGCGTTGGTTTGGTCAAGGCATTTTCAGAAATCATACTACAAGA  
AATACGGTGGCGGCGCCAACGTGCTGGCCGATGGGATCAGCACCGGCGTTCGGGTTAGCTGCCGAAATCATCGGAA  
CATTCGTCCTTGTGTTACACTGTTTTCTCCGCCACTGATCCAAAGCGTAGTGCCAGAGATTCTCACGTCCCTGTAA  
GTTTCTATGAGCTCAATTTTGTCTCAAGTGATTAAGCCTGATTAAGTTTGGAAATATTGCGAATTTTCATGAAATAT  
GTGATTAATAAATTAATTGTTGACTTAACCTAAATCTAACTTAATATAGATTTAAATGCCCTTTGAGTTTATTA  
TAATTAGATAAGTAAAGATGTATCTTTTTTTGCTGTCTCGATTCAAGTTCGGTAAAGATTAGTAGTAAGGGTGAG  
CAGGGGCAGACCTACTTGAGGACCAGCGGGTCGGCTGCGCCCCCTCGATTTTCAGATTTTCTAGTTTCTCCAAA  
TTTTTTTAGGTTTTTCAGATTTTTTTTTCCACGGTGTGTTTGGTTTTGTCCCCCACTGCACTTCCGTCCTGAGTCCAC  
CATTGAATGTGACCCATACCAAATTGCAATATGCTGTACAACCTGGGGCACTTGCCAGCATTATGTGGTTGTAAGT  
GAAATGAAGAAATTAATGTACCAAAGGGGACTTTACCTTGGTGACAGATGCAATGAATCAAGAAAAGTACAAGAG  
ATATTATAATATTGGTTTAACTAATTCGTTATGGACCATGAACTTTGGATTATACCACTTTGTGAGAATGATTT  
TGACCGTAGCAGTGAAAGAAGTATTGGTGACGGCAGATGATTTGATGAGAAAATTGATCGTATTTTAAACAATTT  
AATGATAGAAAATTATATGGTATTATGTCAACCTGTCAACATATCTAGCACTATAACACCATTTGTAAAAATCTTAC  
CTTGGGGACATGGATTTCGTAGATTAGATAGCAATATTAGTAGAAAACTTTTGTGGGCGCTATTAGAACTAAAAAA  
AATTCACGCTTGTGGGGGATATCGTGTGATATACAACAGTAGACAATGATACGTGAATTTTGTCTAAACGACCCG  
CACCGTTTCACATGATGCAGGGGTCTCACTTGAATAAAAAAATGTCGACGCCATGTGTATGTGTGTGCGGTCAC  
CTGCGCGGGTCGTGCAGTGTGATCCATGATACATTGGCGGATAAATTTTTTTTACCAAAAAAAAAAATTAAATTC  
TTCTGTAGTGATGTCCATTAATGTATTTAAATTCAACATACTAATTATGCCGAAGCCATTATTATTTGAAAATA  
CTAGGTATTGGCACCTCTTCCAATTGGATTTGCAGTGTTCATGGTTTCAATTTGGCTACCATTCCAATCACCGGAAC  
GGGCATCAACCCAGCTCGGAGTCTTGGAGCCGAGTAATCTACGACCAGCACAAAGGCTTGGGACGATCACGTAG  
TACATATATTTCAAATTAAATTTAGTTATTCCCATTAACCGTATACTATAACGAAAATTTCTGTCTTTGAAAAGGT  
CTTTTGATGACCCATAATTGGTGCTATTTAATCTAATAATTACATGTATATGTTTTTTCAGTGGATTTTCTGGGT  
CGGACCGTTTTATCGGTGCAGCCGTTGCAGCATTCTACCACCAGTTTATATTGAGAGCTGGAGCAGCAAAGGCCCT  
TGTTTCATTACAGGAGTAGTGCTTCTCATCAT**TGA**

### **>OleurPIP2;6b**

**ATG**ACAAAGGACGCAGGTGTGGCGGAGCACGGGTTCGTTACGACCAAGGACTACCATGATCCGCCTCCGGCGCCG  
CTCATCGACGCGGAGGAGCTGACAAAATGGTCATTTTACAGGGCTATAATAGCTGAGTTCATAGCCACTTTGCTG  
TTTCTTTACATTACAGTTTTGACTGTAATTGGGTACAAGAGCCAGACTGATCCCGACTTGAAGGGTGACCAGTGT  
GATGGGGTTGGAATTCTTGGTATTGCATGGGCCTTTGGTGGCATGATCTTCATTCTGGTTTACTGCACTGCTGGA  
ATTTCTGGGGGGCACATAAAGCCAGCAGTGACCTTTGGCCTGTTCTTGGCCCGAAAGTGTCTTTGATCCGGGCA  
GTGATGTACATGGTGGCACAGTGTGTTGGGAGCCATCTGCGGCGTTGGTTTGGTCAAGGCATTTTCAGAAATCATAC  
TACAAGAAATACGGTGGCGGCGCCAACGTGCTGGCCGATGGGATCAGCACCGGCGTTCGGGTTAGCTGCCGAAATC  
ATCGGAACATTTCGTCCTTGTGTTTACACTGTTTTCTCCGCCACTGATCCAAAGCGTAGTGCCAGAGATTCTCACGTA  
TTGGCACCTCTTCCAATTGGATTTGCAGTGTTCATGGTTTCAATTTGGCTACCATTCCAATCACCGGAACGGGCATC  
AAGCCAGCTCGGAGTCTTGGAGCCGAGTAATCTACGACCAGCACAAAGGCTTGGGACGATCACTGGATTTTCTGG  
GTCGGACCGTTTTATCGGTGCAGCCGTTGCAGCATTCTACCACCAGTTTATATTGAGAGCTGGAGCAGCAAAGGCC  
CTTGGTTTCATTACAGGAGTAGTGCTTCTCATCAT**TGA**

### **>OleurPIP2;6b**

MTKDAGVAEHGSFTTKDYHDPPLIDAEELTKWSFYRAIIAEFIATLLFLYITVLTIVIGYKSQTDPLDKGDQC  
DGVGILGIAWAFGGMIFILVYCTAGISGGHINPAVTFGLFLARKVSLIRAVMYMVAQCLGAICGVGLVKAFQKSY  
YKKYGGGANVLADGISTGVGLAAEIIIGTFVLVYTVFSATDPKRSARDSHVLAPLPIGFAVFMVHLATIPITGTGI  
NPARSLGAAVIYDQHKAWDDHWIFWVGPFIGAAVAIFYHQFILRAGAAKALGSFRSSASHH\*

## **OleurPIP2;7 Oleur061Scf6451g01042.1**

>Oleur061Scf6451:160614..162280 (+ strand) class=gene length=1667

>OleurPIP2;7

**ATG**GTGAAGGATGTTGAGGTCGGAGGCCCTGAATTTACTACAAAAGACTATCAAGACCCCTCCTCCAGCACC GTTG  
ATTGATCCGGAAGAAGTACTAAATGGTCATTTTATAGAGCTATCATTGCTGAATTCGTAGCTACATTACTGTTC  
TTATACATTACTGTTTTGACTGTGATTGGGTACAAGAGCCAGAGCGCCACCGATGAATGCGGCGGCGTTGGCATT  
TTGGGCATTGCTTGGGCCTTTGGTGGCATGATTTTCGTACTTGTTTACTGCACTGCTGGTATTTCCG**GTGAGTTG**  
**CACATCTTAAATATGATTCAAATCATAAAATTGACAAAGTTTTAACACAGATTCCTCTTTCTTTGTGATGATATT**  
**TACGACGTTAATGGTGCAGGAGGGCACATTAACCCGGCAGTGACATTCGGGTTGTTTTAGCCCCGAAAAGTTTCA**  
TTGATTCGGGCCATTATGTACATGGTGGCTCAGTGTGTAGGGGCCATTTGTGGGTGTGGATTGGTGAAGGCATTC  
CAGAGGGCTTACTACGTTAGATACGGTGGTGGCGCCAATGAACCTGGAGATGGATATAGCACAGGCACCGGATTG  
GCGGCCGAGATTATCGGCACTTTTGTGCTTGTTTACACTGTCTTCTCCGCCACGGACCCTAAAAGAAGTGCCAGA  
GACTCCCATGTTCCG**TAATATCCGTGCTTAAGTTTTAGCCAAACAACTCCATAATTTAGCAAGTCAAGATT**  
**TTCTTCAATCAATTTTGGCTGTTGATTAATCCTACTTGAAAATTAATCTAAAG**GATTGGCACCCTGCCTATTG  
GATTGCTGTGTTTCAATGGTTTCAATTTGGCTACAATTCGATCACCGGCACCTGGTATCAACCCCTGCCGAAGTTTGT  
GAGTTCGAGTGATCTATGGCAAGGATAAGGCCTGGGACGATCAAG**TATTGAACATTATTTAAAAATTTGTTTTATT**  
**TTATTGTTAAGTGTGTGTCGAGTACGGCTGCTGACTGACCCTTTTGATCGATTTTTGACAGTGGATCTTCTGGGCT**  
GGACCTTTCAATTGGGGCAGCCATTGCTGCATTGTACCATCAGTACATTCTTAGAGCAGGTGCAGTTAAAGCTCTA  
GGATCATTACAGGAGTAGTGCTTCTGCCTAT**TGA**

>OleurPIP2;7

**ATG**GTGAAGGATGTTGAGGTCGGAGGCCCTGAATTTACTACAAAAGACTATCAAGACCCCTCCTCCAGCACC GTTG  
ATTGATCCGGAAGAAGTACTAAATGGTCATTTTATAGAGCTATCATTGCTGAATTCGTAGCTACATTACTGTTC  
TTATACATTACTGTTTTGACTGTGATTGGGTACAAGAGCCAGAGCGCCACCGATGAATGCGGCGGCGTTGGCATT  
TTGGGCATTGCTTGGGCCTTTGGTGGCATGATTTTCGTACTTGTTTACTGCACTGCTGGTATTTCCGGAGGGCAC  
ATTAACCCGGCAGTGACATTCGGGTTGTTTTTAGCCCCGAAAAGTTTCATTGATTCGGGCCATTATGTACATGGTG  
GCTCAGTGTGTAGGGGCCATTTGTGGGTGTGGATTGGTGAAGGCATTCCAGAGGGCTTACTACGTTAGATACGGT  
GGTGGCGCCAATGAACCTTGGAGATGGATATAGCACAGGACCGGATTGGCGGCCGAGATTATCGGCACCTTTGTG  
CTTGTGTTACACTGCTTCTCCGCCACGGACCCTAAAAGAAGTGCCAGAGACTCCCATGTTCCGGTATTGGCACCA  
CTGCCTATTGGATTGTGCTGTGTTTCAATGGTTTCAATTTGGCTACAATTCGATCACCGGCACCTGGTATCAACCCCTGCC  
CGAAGTTTTGGAGCTGCAGTGATCTATGGCAAGGATAAGGCCTGGGACGATCAATGGATCTTCTGGGCTGGACCT  
TTCATTGGGGCAGCCATTGCTGCATTGTACCATCAGTACATTCTTAGAGCAGGTGCAGTTAAAGCTCTAGGATCA  
TTCAGGAGTAGTGCTTCTGCCTAT**TGA**

>OleurPIP2;7

MVKDVEVGGEFTTKDYQDPPAPPLIDPEELTKWSFYRAIIAEFVATLLFLYITVLTVIGYKSQSATDEC GG VGI  
LGIAWAFGGMIFVLVYCTAGISGGHINPAVTFGLFLARKVSLIRAIMYMAQC VGAICGCGLVKAFQRAYYVRYG  
GGANELGDGYSTGTGLAAEIIIGTFVLVYTVFSATDPKRSARDSHVPVLAPLP IGFVFMVHLATIPITGTGINPA  
RSFGAAVIYGKDKAWDDQWIFWAGPFIGAAIAALYHQYILRAGAVKALGSFRSSASAY\*

## **OleurPIP2;8a Oleur061Scf3978g00008.1**

>Oleur061Scf3978:91118..92620 (- strand) class=gene length=1503

>OleurPIP2;8a

**ATG**TCGAAAGAAGTGACTGAAGAAGGACAAGTACACCCCATGGAAAGGACTATGAGGACCCACCGCCAGCACCA  
TTACTGGACATGGGTGAGCTCATGCTCTGGTCCTTTTACAGAGCCATAATTGCCGAGTTCATTGCCACCCCTGCTC  
TTCCTTTACGTCACCGTCGCCACCGTCATCGGCCACAAGAAGCTCAACGCCGCCGACCAATGCGATGGCGTTGGC  
ATCCTCGGCATCGCTTGGGCCTTTGGTGGCATGATCTTCATCCTTGTTTACTGCACCGCCGGCATCTCAG**GTACA**  
**TGATTCACTGCCTCAACTTCTTAAAGACAAATCACCATTTATTTCTTGAAATTTTACCTGAATTTTTCTCTGCT**  
**GTTCTACAGGTGGTCACATAAACCAGCTGTGACTTTTCGGGTTGTTCTTGGCCAGGAAGGTGTCGTTGATCCGTG**  
CAATTATGTACATGATTGCACAGTGTTTTGGGTGCCGTCTGTGGAGTTGGCCTGGTGAAGGCCTTCATGAAGAGCT  
ACTACAACCGTCTAGGCGGCGGCGCTAACGTGGTGTCTCATGGGTACAATATCGGCACAGCTTTGGGTGCTGAAA  
TTATCGGTACCTTTGTTCTTGTATACACCGTCTTCTCGGCCACTGACCCCAAGAGAAGTGACAGTGACTCTCACG  
TCCCT**GTAAGTAGAAAAAAATGGCTAGCTTATTTGTGGGTTTTTCCTTTTCTTTCTAAGTTAACTTATCATT**  
**TGGATTATTTTAGTTTTGGCTCCTCTTCCAATTGGGTTTGCAGTTTTTCATGGTGCACCTTAGCGACCATCCCCAT**  
CACTGGAACCTGGTATCAACCCCTGCTAGGAGTTTTGGAGTGTCTGTGATCTACAACAATGACAAAGTCTGGGATGA  
CCAT**GTAAGTTGGTTTGGATAAATTACTTTCTTTTTTTTTTTTTTTTCGTTTCTTACTTTTGTGTAAGTTACAAGTA**

AAAAAATTTGGATGGTTCATACAGTGGATTTTCTGGGTGGACCATTTGTGGGAGCTTTGGCGGCAGCAGCATAT  
CATCAGTACATCTTGAGAGCTGCAGCTATTAAGGCAATTGGATCATTCCGCAGCAATCCCACAAAC**TAA**

**>OleurPIP2;8a**

**ATG**TCGAAAGAAGTGACTGAAGAAGGACAAGTACACCCCCATGGAAAGGACTATGAGGACCCACCGCCAGCACCA  
TTACTGGACATGGGTGAGCTCATGCTCTGGTCCTTTTACAGAGCCATAATTGCCGAGTTCATTGCCACCCTGCTC  
TTCCTTTACGTCACCGTCGCCACCGTCATCGGCCACAAGAAGCTCAACGCCGCCGACCAATGCGATGGCGTTGGC  
ATCCTCGGCATCGCTTGGGCCTTTGGTGGCATGATCTTCATCCTTGTTTACTGCACCGCCGGCATCTCAGGTGGT  
CACATAAACCCAGCTGTGACTTTTCGGGTGTTCTTGGCCAGGAAGGTGTCGTTGATCCGTGCAATTATGTACATG  
ATTGCACAGTGTTTGGGTGCCGTCTGTGGAGTTGGCCTGGTGAAGGCCTTCATGAAGAGCTACTACAACCGTCTA  
GGCGGGCGGCTAACGTGGTGTCTCATGGGTACAATATCGGCACAGCTTTGGGTGCTGAAATTATCGGTACCTTT  
GTTCTTGTATACACCGTCTTCTCGGCCACTGACCCCAAGAGAAGTGCACGTGACTCTCACGTCCCTGTTTTGGCT  
CCTCTTCCAATTGGGTTTGCAGTTTTTCATGGTGCACCTAGCGACCATCCCCATCACTGGAAGTGGTATCAACCTT  
GCTAGGAGTTTTGGAGCTGCTGTGATCTACAACAATGACAAAGTCTGGGATGACCATTGGATTTTCTGGGTGGGA  
CCATTTGTGGGAGCTTTGGCGGCAGCAGCATATCATCAGTACATCTTGAGAGCTGCAGCTATTAAGGCAATTGGA  
TCATTCCGCAGCAATCCCACAAAC**TAA**

**>OleurPIP2;8a**

MSKEVTEEGQVHPHGKDYEDPPAPLLDMGELMLWSFYRAIIAEFIATLLFLYVTVATVIGHKKLNAADQCDGVG  
ILGIAWAFGGMIFILVYCTAGISGGHINPAVTFGLFLARKVSLIRAIMYMIQCLGAVCGVGLVKAFMKSYNRL  
GGGANVSHGYNIGTALGAEIIGTFVLVYTVFSATDPKRSARDSHVPVLAPLPIGFAVFMVHLATIPITGTGINP  
ARSFGAAVIYNNDKVDHWFVWGPFGALAAAAYHQYILRAAIIKAIGSFRSNPTN\*

**OleurPIP2;8b Oleur061Scf0410g01025.1**

>Oleur061Scf0410:167787..169203 (- strand) class=gene length=1417

**>OleurPIP2;8b**

**ATG**TCGAAAGAAGTGATTGAAGAAGGACAAGTACACCCCCATGGAAAGGACTATGAGGACCCACCGCCAGCACCA  
TTACTGGACATGGGTGAGCTCATGCTCTGGTCCTTTTATAGAGCCATAATTGCCGAGTTCATTGCCACCCTGCTC  
TTCCTTTACGTCACCGTCGCCACCGTCATCGGCCACAAGAAGCTCAACGCCGCCGACCAATGCGATGGCGTTGGC  
ATCCTCGGCATCGCTTGGGCCTTTGGTGGCATGATCTTCATCCTTGTTTACTGCACCGCCGGCATCTCAG**GTACA**  
**TGATTCAC**TGCTCAACTTCTTCAAGACAAATCACCATTATTTCTTGAAATTTTACCTGAATTTTCTCTGCT  
**GTTCTAC**AGGTGGTCACATAAACCCAGCTGTTACTTTTCGGGTGTTTCTTGGCCAGGAAGGTGTCGTTGATCCGTG  
CAATTATGTACATGATTGCACAGTGTTTGGGTGCCGTCTGTGGAGTTGGCCTGGTGAAGGCCTTCATGAAGAGTT  
ACTACAACCGTCTAGGCGGCGGCTAACTTGGTGTCTCATGGGTACAATATCGGCACAGCTTTGGGTGCTGAAA  
TTATCGGTACCTTTGTTCTTGTATACACCGTCTTCTCGGCCACTGACCCCAAGAGAAGTGCACGTGACTCTCACG  
TCCCT**GTAAGTAG**AAAAAAATAGCTAGCTTATTTGTGGGTTTTTCTTTTCTTTTCTAAGTTAACTTATTTTT  
**TGGATTAT**TTTAGGTTTTGGCTCCTCTTCCAATTGGGTTTGCAGTTTTTCATGGTGCACCTAGCGACCATCCCCAT  
CACTGGAAGTGGTATCAACCCTGCTAGGAGTTTTGGAGCTGCTGTGATCTACAACAATGACAAAGTCTGGGATGA  
CCAT**GTAAGTTGG**TTTGGATAAATTACTTTCTTTTTATTTTTTTCGTTTCTTACTTTTGTGAACTTACAAGTAAA  
**AAAATTTGG**ATGGTTCATACAGTGGATTTTCTGGGTAGGACCATTTGTGGGAGCTTTGGCGGCAGCAGCATATCA  
TCAGTACATCTTGAGAGCTGCAGCTATTAAGGCAATTGGATCATTCCGCAGCAATCCCACAAAC**TAA**

**>OleurPIP2;8b**

**ATG**TCGAAAGAAGTGATTGAAGAAGGACAAGTACACCCCCATGGAAAGGACTATGAGGACCCACCGCCAGCACCA  
TTACTGGACATGGGTGAGCTCATGCTCTGGTCCTTTTATAGAGCCATAATTGCCGAGTTCATTGCCACCCTGCTC  
TTCCTTTACGTCACCGTCGCCACCGTCATCGGCCACAAGAAGCTCAACGCCGCCGACCAATGCGATGGCGTTGGC  
ATCCTCGGCATCGCTTGGGCCTTTGGTGGCATGATCTTCATCCTTGTTTACTGCACCGCCGGCATCTCAGGTGGT  
CACATAAACCCAGCTGTTACTTTTCGGGTGTTCTTGGCCAGGAAGGTGTCGTTGATCCGTGCAATTATGTACATG  
ATTGCACAGTGTTTGGGTGCCGTCTGTGGAGTTGGCCTGGTGAAGGCCTTCATGAAGAGTTACTACAACCGTCTA  
GGCGGGCGGCTAACTTGGTGTCTCATGGGTACAATATCGGCACAGCTTTGGGTGCTGAAATTATCGGTACCTTT  
GTTCTTGTATACACCGTCTTCTCGGCCACTGACCCCAAGAGAAGTGCACGTGACTCTCACGTCCCTGTTTTGGCT  
CCTCTTCCAATTGGGTTTGCAGTTTTTCATGGTGCACCTAGCGACCATCCCCATCACTGGAAGTGGTATCAACCTT  
GCTAGGAGTTTTGGAGCTGCTGTGATCTACAACAATGACAAAGTCTGGGATGACCATTGGATTTTCTGGGTAGGA  
CCATTTGTGGGAGCTTTGGCGGCAGCAGCATATCATCAGTACATCTTGAGAGCTGCAGCTATTAAGGCAATTGGA  
TCATTCCGCAGCAATCCCACAAAC**TAA**

**>OleurPIP2;8b**

MSKEVIEEGQVHPHGKDYEDPPAPLLDMGELMLWSFYRAIIAEFIATLLFLYVTVATVIGHKKLNAADQCDGVG  
ILGIAWAFGGMIFILVYCTAGISGGHINPAVTFGLFLARKVSLIRAIMYMIQCLGAVCGVGLVKAFMKSYNRL  
GGGANLVSHGYNIGTALGAEIIGTFVLVYTVFSATDPKRSARDSHVPVLAPLPIGFAVFMVHLATIPITGTGINP  
ARSFGAAVIYNNDKVDHWFVWGPFGALAAAAYHQYILRAAIIKAIGSFRSNPTN\*

## **OleurPIP2;9a Oleur061Scf0410g01025.1**

>Oleur061Scf7760:51176..52742 (- strand) class=gene length=1567

>**OleurPIP2;9a**

**ATG**ACGAAGGAAGTGAGTGAAGAAGGACAGGTACATCACCATGGAAAGGACTACGTGGACCCACCACCAGCACCA  
TTGCTAGACATGGGTGAGCTCAAGCTCTGGTCCTTTTACAGAGCTCTTATCGCCGAGTTCATCGCCACCCCTTCTC  
TTCCTCTACGTACACGTCGCTACCGTCATCGGCCACAAGAAGCTCAACGCGGCCGACCAATGTGATGGCGTTGGC  
ATTCTCGGTATCGCCTGGGCCTTTGGTGGCATGATCTTCATCCTCGTTTACTGTACCGCCGGCATCTCAG**GTACT**  
**CAATTCTTTAGGACAAATTCTTCTCCAGAAGCACTACCTATTCTTGAATTTCCCTGAATTTCTCTCTATTTCG**  
**GCTGCAGGTGGT**CACATAAACCCGGCTGTGACTTTTGGTTTGTTCCTTGGCAAGGAAGGTATCGTTGATCCGTGCT  
GTTATGTACATGATTGCACAGTGTGGGTGCCATTTGTGGAGTTGGGCTGGTGAAGGCCTTCATGAAGGGGTAC  
TACAACCGTCTAGGCGGCGGCGCTAACTCGGTGTCTCATGGTTACAACACAGGCACAGCTTTGGGTGCTGAAATC  
ATCGGCACCTTTGTGCTTGTTTACACCGTCTTCTCCGCCACTGACCCCAAGAGAAGTGCACGTGACTCTCATGTC  
CCT**GTAAGTAGAAGCAATTTCTAGCTTATTTTGTGTTTGCTTTTTCTAAAGTGAAGTTGAAGTTATTTTGGATTA**  
**TTTTCAGGTTTTGGCTCCTTTACCAATTGGATTTCAGTGTTCGTGGTGCACCTTGGCCACCATCCCTATTACTGG**  
AACTGGTATCAACCCCTGCTAGGAGTTTTGGAGTGGCGTCATCTTCAACAATGATAAAGTCTGGGATGACCAT**GT**  
AAGTTCGTCTAGTAAGTTACTTTTTTTTCAAGTATATATAATTTATTTTCTTGAAGTAATAAGTATAATTTTGAT  
GATGCATGTAGTGGATTTTCTGGGTGGACATTTGTGGGAGCATTGGCAGCAGCAGCATATCATCAGTACATCT  
TAAGGGCTGCAGCTATTAAGGCATTGGGATCATTCGCGAGCAACCCACAAAC**TAA**

>**OleurPIP2;9a**

**ATG**ACGAAGGAAGTGAGTGAAGAAGGACAGGTACATCACCATGGAAAGGACTACGTGGACCCACCACCAGCACCA  
TTGCTAGACATGGGTGAGCTCAAGCTCTGGTCCTTTTACAGAGCTCTTATCGCCGAGTTCATCGCCACCCCTTCTC  
TTCCTCTACGTACACGTCGCTACCGTCATCGGCCACAAGAAGCTCAACGCGGCCGACCAATGTGATGGCGTTGGC  
ATTCTCGGTATCGCCTGGGCCTTTGGTGGCATGATCTTCATCCTCGTTTACTGTACCGCCGGCATCTCAGGTGGT  
CACATAAACCCGGCTGTGACTTTTGGTTTGTTCCTTGGCAAGGAAGGTATCGTTGATCCGTGCTGTTATGTACATG  
ATTGCACAGTGTGGGTGCCATTTGTGGAGTTGGGCTGGTGAAGGCCTTCATGAAGGGGTACTACAACCGTCTA  
GGCGGCGGCGCTAACTCGGTGTCTCATGGTTACAACACAGGCACAGCTTTGGGTGCTGAAATCATCGGCACCTTT  
GTGCTTGTTTACACCGTCTTCTCCGCCACTGACCCCAAGAGAAGTGCACGTGACTCTCATGTCCCTGTTTTGGCT  
CCTTTACCAATTGGATTTCAGTGTTCGTGGTGCACCTTGGCCACCATCCCTATTACTGGAAGTGGTATCAACCCCT  
GCTAGGAGTTTTGGAGTGGCGTCATCTTCAACAATGATAAAGTCTGGGATGACCATTGGATTTTCTGGGTGGGA  
CCATTTGTGGGAGCATTGGCAGCAGCAGCATATCATCAGTACATCTTAAGGGCTGCAGCTATTAAGGCATTGGGA  
TCATTCCGCGAGCAACCCACAAAC**TAA**

>**OleurPIP2;9a**

MTKEVSEEGQVHHHGKDYVDPPPPAPLLDMGELKLWSFYRALIAEFIATLLFLYVTVATVIGHKKLNAADQCDGVG  
ILGIAWAFGGMIFILVYCTAGISGGHINPAVTFGLFLARKVSLIRAVMYMIAQCLGAICGVGLVKAFMKGYYNRL  
GGGANSVSHGYNTGTALGAEIIGTFVLVYTVFSATDPKRSARDSHVPVLAPLPIGFAVVFVHLATIPITGTGINP  
ARSFGAAVIFNNDKVVDDHWIFWVGPFVVGALAAAAYHQYILRAAAIKALGSFRSNPTN\*

## **OleurPIP2;9b Oleur061Scf1616g00016.1**

>Oleur061Scf1616:35879..37453 (+ strand) class=gene length=1575

>**OleurPIP2;9b**

**ATG**ACGAAGGAAATGAGTGAAGAAGGACAGGTACATCACCATGGAAAGGACTACGTGGATCCACCACCAGCACCA  
TTGCTAGACATGGGTGAGCTCAAGCTCTGGTCCTTTTACAGAGCTCTTATCGCCGAGTTCATCGCCACCCCTTCTC  
TTCCTCTACGTACACGTCGCTACCGTCATCGGCCACAAGAAGCTCAACGCGGCCGATCAATGTGATGGCGTTGGC  
ATTCTCGGTATCGCCTGGGCCTTTGGTGGCATGATCTTCATCCTCGTTTACTGTACCGCCGGCATCTCAG**GTACT**  
**CAATTCTTTAGGACAAATTCTTCTCCAGAAGCACCACCTATTCTTGAATTTCCCTAAATTTCTCTCTATTTCG**  
**GCTGCAGGTGGT**CACATAAACCCGGCTGTGACTTTTGGTTTGTTCCTTGGCAAGGAAGGTATCGTTGATCCGTGCT  
GTTATGTACATGATTGCACAGTGTGGGTGCCATTTGTGGAGTTGGGCTGGTGAAGGCCTTCATGAAGGGGTAC  
TACAACCGTCTAGGCGGCGGCGCTAACTCGGTGTCTCATGGTTACAACACAGGCACAGCTTTGGGTGCTGAAATC  
ATCGGCACCTTTGTGCTTGTTTACACCGTCTTCTCCGCCACTGACCCCAAGAGAAGTGCACGTGACTCTCATGTC  
CCT**GTAAGTAGAAGCAATTTCTAGCTTATTTTGTGTTTGCTTTTTCTAAAGTGAAGTTGAAGTTATTTTGGATTA**  
**TTTTCAGGTTTTGGCTCCTTTACCAATTGGATTTCAGTGTTCGTGGTGCACCTTGGCCACCATCCCTATTACTGG**  
AAGTGGTATCAACCCCTGCTAGGAGTTTTGGAGTGGCGTCATCTTCAACAATGATAAAGTCTGGGATGACCAT**GT**  
AAGTTCGTCTAGTAAGTTACTTTTTTTTCAAGTATATATAATTAATTTTCTTGAAGTAATAAGTATAATTTTGAT

GATGCATGTAGTGGATTTTCTGGGTTGGACCATTGTGGGAGCATTGGCAGCAGCAGCATATCATCAGTACATCT  
TAAGGGCTGCAGCTATTAAGGCATTGGGATCATTCGCGAGCAACCCACAAACTAA

>OleurPIP2;9b

ATGACGAAGGAAATGAGTGAAGAAGGACAGGTACATCACCATGGAAAGGACTACGTGGATCCACCACCAGCACCA  
TTGCTAGACATGGGTGAGCTCAAGCTCTGGTCCTTTTACAGAGCTCTTATCGCCGAGTTCATCGCCACCCCTTCTC  
TTCCTCTACGTCACCGTCGCTACCGTCATCGGCCACAAGAAGCTCAACGCCGCCGATCAATGTGATGGCGTTGGC  
ATTCTCGGTATCGCCTGGGCCTTTGGTGGCATGATCTTCATCCTCGTTTACTGTACCGCCGGCATCTCAGGTGGT  
CACATAAACCCGGCTGTGACTTTTTGGTTTGTCTTGGCAAGGAAGGTATCGTTGATCCGTGCTGTATGTACATG  
ATTGCACAGTGTGTGGGTGCCATTTGTGGAGTTGGGCTGGTGAAGGCCTTCATGAAGGGGTACTACAACCGTCTA  
GGCGGCGGCGCTAACTCGGTGTCTCATGGTTACAACACAGGCACAGCTTTGGGTGCTGAAATCATCGGCACCTTT  
GTGCTTGTGTACACCGTCTTCTCGCCACTGACCCCAAGAGAAGTGCACGTGACTCTCATGTCCCTGTTTGGCT  
CCTTTACCAATTGGATTTGCAGTGTTCGTGGTGCACCTTGGCCACCATCCCTATTACTGGAAGTGGTATCAACCT  
GCTAGGAGTTTTGGAGCTGCCGTATCTTCAACAATGATAAAGTCTGGGATGACCATTGGATTTTCTGGGTTGGA  
CCATTTGTGGGAGCATTGGCAGCAGCAGCATATCATCAGTACATCTTAAGGGCTGCAGCTATTAAGGCATTGGGA  
TCATTCGCGAGCAACCCACAACTAA

>OleurPIP2;9b

MTKEMSEEGQVHHHGKDYVDPPAPLLDMGELKLWSFYRALIAEFIATLLFLYVTVATVIGHKKLNAADQCDGVG  
ILGIAWAFGGMIFILVYCTAGISGGHINPAVTFGLFLARKVSLIRAVMYMIAQCLGAICGVGLVKAFMKGYNRL  
GGGANSVSHGYNTGTALGAEIIGTFVLVYTVFSATDPKRSARDSHVPVLAFLPIGFVAVFVHLATIPITGTGINP  
ARSFGAAVIFNNDKVWDDHWIFWVGPFVGGALAAAAYHQYILRAAAIKALGSFRSNPTN\*

## OleurPIP2;10 Oleur061Scf0101g01021.1

>Oleur061Scf0101:86880..93288 (- strand) class=gene length=6409

>OleurPIP2;10

ATGGAAAACACGTTGGAGTGGCGAAGGACTACCGCGATCCACTGCCGGCCCCGCTGATTGGCTTGATGGAGCTT  
ACAAAGTGGTCATTTTATAGAGCTGTTATAGCTGAGTTTATAGCCACCTTGCTCTTCTTTACATTACGGTTTTG  
ACTGTGATTGGGTACAAGAGCCAGAATGATACTCATTGCGGCGGCGGCGGCGTCCGAATTCCTTGGTATTGCATGG  
GCATTTGGTGGCATGATCTTCGTTCTTGTCTACTGCACTGCTGGAATCTCCGTTGAGTCTTTGTTTATACATATAC  
ATACATACATCAGATGCATAAATGTAATGGCATATTTTCATGTTCATGTCCATCTCAGGGGGACACATTAATCCAGC  
AGTGACATTCGGGCTTTTCTTGGCCCCGACAGGTGTCAATGATCAAAGCCATTATGTATATGGTGGCTCAGTGTTT  
GGGGGCCATTTGTGGCGTCGCGCTGGTGAAGGCGGTACAGAAGTCAACACTACAAGAAATATGGCGGCGGCGTAAA  
TGAGCTCTCCGATGGCTACAGCACCAGCGGCGGATTGGCAGCAGAGATCATCGGAACATTCTGTTCTGTCTACAC  
AGTTTTCTCTGCCATTGATGCCAAGAGAAAAGCCAGGGATTCCCATGTCCCTGTAAGTGCATATATACAATTCTC  
CATTTTTGACCTGCTCGATAATCTACTTATAAGTACATTTAGAGCATGTGTTTTTCAATTAAACACTTGGTAAAGT  
GAATGCCATGCATTATGATACCATACACGTGAAACTGCAAACTTCGTGGTTCAATAATGATACCATGCACGTTG  
TACTGTAAAACCATATTGTCCATGCATCATTATTACATCAATATGGAGTTCCAATTTTTTTTACGATAAGATTT  
GTATTGCTTGAGTTTGAAATCGAAGTTGTCACAGTTAATCTTATTTTGAGCTCGACTTAATTCAGTCTTTTATC  
TATACGAAAGGAGCGAATATTGATATTTTTTGTATTTGAACCTGAATCATAGTTTTTGGCACCTCTCTCAATTGG  
ATTTGCAGTTTTTATGGTTCACTTGGCCACTATCCCAGTCACTGGTACTAGTATTAATCCAGCTAGAAGCTTTGG  
ACCTGCAGTGATCTACAACCAGAAAAAGGCTTGGGATGATCAGGTAAACATAGCCTAAAAAGATTTATAACGAACT  
AAGGGTGCTTTTGGTTTGTCAATTTTTCAGTTTTTGCAAAATACTGAAAACGTGTTTGATCTGTTATTTTAGAAAA  
CAGTTTTGAAAATAAGCCGTTTGGTATCCATTTTTTTCAAATGAATTTTTCTATTTTTCTTTTCAACCACACA  
TTTTTTAATTAATAATATTACACATAAATCAAAACTTCTCCTTATTTTTTCAACTACACATTTTTCATTAATT  
TACTATTTCAAAAATGTATTTTTTACATAAAAATGTCTTTCAAACACCCTCTAAATTTATAATAAAAAACAACGTTAT  
ATATATAGAATAATTTTATGGAATAAAATGTCATACAATAAATTTTTCAAATTTTTAAACCAAAACATGTTTTCTAA  
TTTTTTGTTTTGAGAAATAATTTTTTAAAATGAAAATCAAACGAGTTTTTACCAATATTGAATAGATCGTCAAA  
ACAGAGACCTAAAATGAACTCAAATTGAAAATTGAAACATAAAACCAACAGACCTAAATCTTACGATGAAATTTG  
GATCTACAACCTGAATATTTTTTCTCTCCTCTATTCAATTCATTGTTGATGCTATTGGGGTGTCCAAATGAAAGA  
TGTTAGTAAGACTAAAGTCAGGGAGAATATTTTATTTCAATTACTCCTAATTATTTATCCGACAATAAGAATGAT  
TTTTAAACGCCACACTAGTTAACTAAAAGTTACATGGATCCCTTTCTATAAGTACTTTGTTCCCTTTATTGCCGA  
AATAGTCCTAATGAAATGCCTAGTAGGATTCATATTATAAAATATGAGAAAAATTAATATGCGTTTAATAATAACC  
TAGCTCAATCTTTATGATCCTTAATATATATGAACCTCGAGATTGAGTATGGAAAAATATTTATATCCCAACACT  
AGTTGGAACGACTATGAACAAAATACAATATGAGTACCATTCTTATTAGTCATAAAATTTATAAATCCCTGTTTG  
GTTCTTATTCTTTTTCTCATAAAATGAAAAATGATAGTTATTTCATCATATCAAGTCACCAAAATTTGAATTTAT  
ATTTCTTGTGTAGGTCGCGTAACGACTATATTTTCTATTCTCCTCCAAAAATGAGAAACAAACGGGGGCTA  
ATTTTAAACATTATCTACCCACAGCCACAAGTGATAATTTATTTGTTTATTTTGTCTCTTAATTCCAGTGG  
ATATTCTGGGTAGGACCCTTCATTGGTGCAGCCATGGCAGCCTTCTACCACCAGTGTATTTTGAGAGCTAAAGCC  
TTTCGTTTCATATAGAAGCAGCTCCCGTATTAA

>OleurPIP2;10

**ATG**GAAAACCACGTTGGAGTGGCGAAGGACTACCGCGATCCACTGCCGGCCCCGCTGATTGGCTTGATGGAGCTT  
ACAAAGTGGTCATTTTATAGAGCTGTTATAGCTGAGTTTATAGCCACCTTGCTCTTCCCTTACATTACGGTTTTG  
ACTGTGATTGGGTACAAGAGCCAGAATGATACTCATTGCGGGCGGCGGGCGTCCGAATTCCTTGGTATTGCATGG  
GCATTTGGTGGCATGATCTTCGTTCTTGTCTACTGCACTGCTGGAATCTCCGGGGGACACATTAATCCAGCAGTG  
ACATTCGGGCTTTTCTTGGCCCCGACAGGTGTCAATGATCAAAGCCATTATGTATATGGTGGCTCAGTGTTTGGGG  
GCCATTTGTGGCGTCGCGCTGGTGAAGGCGGTACAGAAGTCACACTACAAGAAATATGGCGGCGGGCTAAATGAG  
CTCTCCGATGGCTACAGCACCGGCGGGGATTGGCAGCAGAGATCATCGGAACATTTCGTTCTTGTCTACACAGTT  
TTCTCTGCCATTGATGCCAAGAGAAAAAGCCAGGGATTCCCATGTCCCTGTTTTGGCACCTCTCTCAATTGGATTT  
GCAGTTTTTATGGTTCACTTGGCCACTATCCCAGTCACTGGTACTAGTATTAATCCAGCTAGAAGCTTTGGACCT  
GCATGGATATTCTGGGTAGGACCTTCATTGGTGCAGCCATGGCAGCCTTCTACCACCAGTGTATTTTGAGAGCT  
AAAGCCTTTCGTTTCATATAGAAGCAGCTCCCGTATT**TAA**

**>OleurPIP2;10**

MENHVGVAKDYPDLPAPPLIGLMELTKWSFYRAVIAEFIATLLFLYITVLTIVIGYKSQNDTHCGGGGVGILGIAW  
AFGGMIFVLVYCTAGISGGHINPAVTFGLFLARQVSMIKAIMYMVAQCLGAICGVALVKAVQKSHYKKGVGNE  
LSDGYSTGGGLAAEIIIGTFVLVYTVFSAIDAKRKARDSHVPVLAPLSIGFAVFMVHLATIPITGTSINPARSFGP  
AWIFWVGPFIGAAMAAFYHQCILRAKAFRSYRSSRI\*

### **OleurPIP2;12 Oleur061Scf0101g01021.1**

**>Oleur061Scf0156:141041..142902** (- strand) class=gene length=1862

**>OleurPIP2;12**

**ATG**ACAAAGGAAGTTAGCGAAGAAGGACAAGTACATCATCATGGCAAGGACTACGTGGATCCACCACCAGCTCCA  
CTGCTGGACATGGGTGAGCTCAAGCTCTGGTCTTTCTATAGGGCCCTAATCGCTGAGTTCATCGCCACACTTCTC  
TTTCTCTACGTCACTGTGCGCCACCGTCATCGGCCACAAGAAGCTCAACAACGCCGACCAGTGCGACGGAGTTGGT  
CTCCTCGGTATTGCCTGGGCCTTTGGTGGCATGATCTTCATTCTCGTCTACTGCACCGCTGGAATCTCAG**TTCC**  
**ACCACCATTTTCAACACCCTAATAGAATCTCTTACGAAATTTTTGTGCTTCCTTGTCTGAAATATGAACTTTTTG**  
**TTATTTTTGTGGTGTAGGTGGTCACATAAATCCGGCCGTGACTTTCGGGTGTTCTTGGCGAGGAAGGTGTCTCT**  
**GTTTAGGGCGCTTGGGTACATGGTGGCGCAGTGTTTGGGTGCTATTTGCGGAGTTGGGTGGTAAAGGCCCTTCAT**  
**GAAGAGTTTCTACAACCACTTGGGTGGTGGTGCTAACTCTGTGGCTTCTGGGTACAACAAGGGCACTGCCCTCGG**  
**TGCTGAGATTATCGGCACCTTTTGTACTTGTTTACACCGTCTTCTCAGCCACTGACCCAAAGAGAAGCGCACGTGA**  
**TTCTCACGTCCCGGTACGTATACATACAACTCATCTATTCAAGATATTTTTAGTGATTCTTGAGAATTAACTTGA**  
**AGTTTTGGTGCTTATAGGTTTTGGCTCCGCTTCCAATTGGATTTGCAGTATTCATGGTTTCATTTGGCCACCATCC**  
**CAATCACTGGAACCTGGTATAAACCTGCTAGGAGCTTCGGAGCTGCTGTTATCTTCAACAACGAGAAAGTCTGGG**  
**ATGATCATGTAAGTTTCAATTGCATGCAGGCATGCATATAGAGATTTGTTCTGGTATCTTTTGTTTTATGTTTAA**  
**ACATGAACCTTACTTTGATTGTGCAGTGGATTTTCTGGGTGGACCATTTGTGGGAGCATTGGCAGCAGCGATATA**  
**CCACAGTATATCCTTAGAGCTGCAGCCCTTAAGGCTTTGGGATCCTTCAGGAGCAACCCACCAAC**TAA****

**>OleurPIP2;12**

**ATG**ACAAAGGAAGTTAGCGAAGAAGGACAAGTACATCATCATGGCAAGGACTACGTGGATCCACCACCAGCTCCA  
CTGCTGGACATGGGTGAGCTCAAGCTCTGGTCTTTCTATAGGGCCCTAATCGCTGAGTTCATCGCCACACTTCTC  
TTTCTCTACGTCACTGTGCGCCACCGTCATCGGCCACAAGAAGCTCAACAACGCCGACCAGTGCGACGGAGTTGGT  
CTCCTCGGTATTGCCTGGGCCTTTGGTGGCATGATCTTCATTCTCGTCTACTGCACCGCTGGAATCTCAGGTGGT  
CACATAAATCCGGCCGTGACTTTCGGGTGTTCTTGGCGAGGAAGGTGTCTCTGTTTAGGGCGCTTGGGTACATG  
GTGGCGCAGTGTTTGGGTGCTATTTGCGGAGTTGGGTGGTAAAGGCCCTTCATGAAGAGTTTCTACAACCACTTG  
GGTGGTGGTGCTAACTCTGTGGCTTCTGGGTACAACAAGGGCACTGCCCTCGGTGCTGAGATTATCGGCACCTTTT  
GTACTTGTTTACACCGTCTTCTCAGCCACTGACCCAAAGAGAAGCGCACGTGATTCTCACGTCCCGGTTTTGGCT  
CCGCTTCCAATTGGATTTGCAGTATTCATGGTTTCATTTGGCCACCATCCCAATCACTGGAACCTGGTATAAACCTT  
GCTAGGAGCTTCGGAGCTGCTGTTATCTTCAACAACGAGAAAGTCTGGGATGATCATTGGATTTTCTGGGTGGGA  
CCATTTGTGGGAGCATTGGCAGCAGCGATATACCACCAGTATATCCTTAGAGCTGCAGCCCTTAAGGCTTTGGGA  
TCCTTCAGGAGCAACCCACCAAC**TAA**

**>OleurPIP2;12**

MTKEVSEEGQVHHHGKDYVDPPAPLLDMGELKLWSFYRALIAEFIATLLFLYVTVATVIGHKKLNNADQCDGVG  
LLGIAWAFGGMIFILVYCTAGISGGHINPAVTFGLFLARKVSLFRALGYMVAQCLGAICGVGLVKAFMKSFYNHL  
GGGANSVASGYNKGTALGAEIIIGTFVLVYTVFSATDPKRSARDSHVPVLAPLPIGFAVFMVHLATIPITGTGINP  
ARSFGAAVIFNNEKVWDDHWIFWVGPFVVGALAAAIYHQYILRAAALKALGSFRSNPTN\*

### **OleurTIP1;1 Oleur061Scf3090g01006.1**

**>Oleur061Scf3090:93487..94956** (- strand) class=gene length=1470

>OleurTIP1;1

ATGCCTATTTCAAGAGTCGCTATTGGATCTCCGGCGGAGTTTCAGCCAACTGGATGCCATCAAGGCTGCCGTGGCT  
GAGTTCATTTCCATGTTGATTTTTGTTTTTGTCTGGTCAAGGCTCTGGCATGGCTTTTCGTAAGTAGTTCTGCTGA  
ACAAACTCATTTAAAGTTTTAAGTTGTTAGAAATCGATAATTACATCATTGGATTTTTATTTTTTCACTTTTTC  
AACAGCTAAGCTTACGGACAATGAATCAACAACGCCGGCTGGCCTCATTGCTGCATCGATAGCACATGCTTTTGC  
GCTTTTTGTGGCGGTTTTCCGTCGGTGCCAACATCTCCGGCGGCCACGTAAACCCTGCTGTACCTTAGGTGCATT  
TGTTGGTGGTACATCACATTGTTTAGAAGCATCATGTACTGGATTGCCCAATTGCTTGGATCTGTTATTGCATG  
CTTGCTTCTTAAGTTTTGCCACTGGTGGACTCGTAAGTTGAATCTTATATACTCTGTCCAGTTGAGTCCATTACTG  
TAACATATTGGCTAATGTTCAATCCTTGATTGTAGGAAACATCAGCCTTTGCACTTTTCATCGGGAGTGACAGTTT  
GGAATGCAGTCATTTTCGAGATAGTGATGACCTTTGGACTTGTTTACACAGTTTATGCCACTGCAGTGGATCCAA  
AGAAGGGTAATTTAGGGATCATTGCTCCCATTTGCCATTGGCTTCATTGTTGGTGCCAACATCTTAGCCGGTGGCG  
CATTCGATGGTGCATCCATGAACCCAGCCGTGTCTTTTGGCCCTGCTGTGTCGTCAGCTGGACATGGGACAGCCACT  
GGGTCTACTGGCTCGGCCCATTTGTCTGGTGTGGAATTGCTGCTCTGGTCTATGAAATCTTGTTTCATTAACCAGA  
GCCATCAACAGCTCCCTACCAGTGCAGAATAC

>OleurTIP1;1

ATGCCTATTTCAAGAGTCGCTATTGGATCTCCGGCGGAGTTTCAGCCAACTGGATGCCATCAAGGCTGCCGTGGCT  
GAGTTCATTTCCATGTTGATTTTTGTTTTTGTCTGGTCAAGGCTCTGGCATGGCTTTTCGCTAAGCTTACGGACAAT  
GAATCAACAACGCCGGCTGGCCTCATTGCTGCATCGATAGCACATGCTTTTGCCTTTTTGTGGCGGTTTCGGTC  
GGTGCCAACATCTCCGGCGGCCACGTAAACCCTGCTGTACCTTAGGTGCATTGTTGGTGGTGCATCACATTG  
TTTAGAAGCATCATGTACTGGATTGCCCAATTGCTTGGATCTGTTATTGCATGCTTGTCTTAAAGTTTGCCACT  
GGTGGACTCGAAACATCAGCCTTTGCACTTTTCATCGGGAGTGACAGTTTGAATGCAGTCATTTTCGAGATAGTG  
ATGACCTTTGGACTTGTTTACACAGTTTATGCCACTGCAGTGGATCCAAAGAAGGGTAATTTAGGGATCATTGCT  
CCCATTGCCATTGGCTTCATTGTTGGTGCCAACATCTTAGCCGGTGGCGCATTTCGATGGTGCATCCATGAACCCA  
GCCGTGTCTTTTGGCCCTGCTGTGTCGTCAGCTGGACATGGGACAGCCACTGGGTCTACTGGCTCGGCCCATTTGTC  
GGTGTGGAATTGCTGCTCTGGTCTATGAAATCTTGTTTCATTAACCAGAGCCATCAACAGCTCCCTACCAGTGCA  
GAATAC

>OleurTIP1;1

MPISRVAIGSPAEFSQLDAIKAABADEFISMLIFVFAGQSGMAFAKLTDNESTTPAGLIAASIAHAFALFVAVSV  
GANISGGHVNPAVTLGAFVGGHITLFRSIMYWIAQLLGSVIACLLLKFATGGLETSALSSGVTVWNAVIFEIV  
MTFGLVYTVYATAVDPKKGNLGIAPIAIGFIVGANILAGGAFDGAASNPAVSFGPAVVSWTWDSDHWVYWLGPV  
GAGIAALVYEILFINQSHQQLPTSAEY\*

## OleurTIP1;2a Oleur061Scf3090g01006.1

>Oleur061Scf8429:141483..143267 (+ strand) class=gene length=1785

>OleurTIP1;2a

ATGCCTTTCTCAAGAATTTCCGTCGGAAGTCCGGCGGAGGCCAGCCATCCAGATACCTTGAAAGCCGCCTTAGCC  
GAATTCATTTCAATGGTAATTTTTGTATTTGCTGGTGAAGGCTCTGGCATGGCTTTTGTAAGTACTTGTGCCCT  
CATATTAGTTTTACAATTGTTCTTCTTGACAAAATTATTTGCTTACTTCCTTGACAAAATGACACTTGGTATTC  
AATCATTTAGACTGTTTTAAAAACAGTTAGTTTTTACCCCAATCATCTGCTGCCAACGTTGTATCTATTAAGTAGG  
TGGGCGGAAAATTATGTACAAATGACTCAATCCTAAGTTCTAAACACTTGTCTTTATTCTATTCAATCTCATAT  
ATAATCATTTTTTCTACAGCCAAGCTTACAGACGGTGGATCGAGCACGCCGGCTGGCCTTATTGCTGCGGCGATA  
GCCCATTGCTTTTCGCACTTTTTGTGGCAGTCTCGGTTGCTGCCAACATTTCCGGTGGTGCATGTAAACCCTGCAGTC  
ACCTTTGGTGCTTTTGTGGTGGTCACCTATCATTGGTTTAAACTATTTTGTATTGGATTGCCCAATTGCTTGGTA  
GCTATTGTTGCATCTTGTCTCTTAAAGTTCTCCACCGGTGGCTTGTAAGTAATTAATTCCTCAAAGCTATATTA  
TTACACATAAAAGTTCTTCTTCATCATTTTTTCTGAAATGTGGAAGAAGAAGCAATGATGCGATTTCATTAGAATT  
CTTGAAAAAAAATAAGGAAAATTCAAATTAATCTCTTCTACAGGAAACAAAAATAAAAGCAAAAGACTATACCAAA  
CGTCCCTTAGAATCGCTGGCCTACAGCATGTTTGGCTGGCTAAGCTTCAAAGAAGTAAAAGTTAATTTCTTTT  
CAAACATGTTAATAGAATTATTTTCTTAAATTTAAGTAAAAGAATTATTTATTTAAAGAAAATTTACGTAT  
AAGAACCTTCCATGTTTTCAATCTCCACGAATAAAAAATTGTCCATTACAGAACTTACTTATTTCCATGCTTTTG  
TGTGTGACCTGAACCTCAAATTTTGTCTTGTTACATCGTGCAGGAACTTCCGCATTTGCACTTTCAACCGGGGTA  
TCGTCGTGGAATGCCCTTGTTTTCGAAATAGTGATGACATTTGGCCTGGTTTTACACAGTTTATGCCACAGCAGTG  
GATCCAAAGAGGGGTGATATAGGTATCATAGCCCCTATTGCCATTGGCTTCATTGTGGGTGCCAACATTTTGGCT  
GGCGGTGCCTTCGACGGTGCATCCATGAACCCAGCCGTGTCTGTTCCGGCCCTGCAGTCGTCAGCTGGACATGGGAT  
AGCCACTGGGTGTACTGGCTTGGCCCATTGTTGGTGTGGAATTGCTGCTATTGTCTATGAAATCGTCTTCATT  
AACCAGACACTCACGAGCCACTCCCCTCCAGTGAGTAC

>OleurTIP1;2a

ATGCCTTTCTCAAGAATTTCCGTCGGAAGTCCGGCGGAGGCCAGCCATCCAGATACCTTGAAAGCCGCCTTAGCC  
GAATTCATTTCAATGGTAATTTTTGTATTTGCTGGTGAAGGCTCTGGCATGGCTTTTGCCAAGCTTACAGACGGT  
GGATCGAGCACGCCGGCTGGCCTTATTGCTGCGGCGATAGCCCATGCTTTTCGCACTTTTTGTGGCAGTCTCGGTT  
GCTGCCAACATTTCCGGTGGTGCATGTAAACCCTGCAGTCACCTTTGGTGCCTTTGTTGGTGGTGCACCTATCATTTG



TTTAAAACTATTTTGTATTGGATTGCCCAATTGCTTGGAGCTATTGTTGCATGCTTGCTCCTAAAGTTCTCCACC  
GGTGGCTTGGAACCTTCCGCATTTGCACTTTCAACCGGGGTATCGTCGTGGAATGCCCTTGTTTTCGAAATAGTG  
ATGACATTTGGCCTGGTTTACACAGTTTATGCCACAGCAGTGATCCAAAGAGGGGTGATATAGGTATCATAGCC  
CCTATTGCCATTGGCTTCATTGTGGGTGCCAATTTTGGCTGGCGGTGCCTTCGACGGTGCATCCATGAACCCA  
GCCGTGTCGTTCCGGCCCTGCAGTCGTGAGCTGGACATGGGATAGCCACTGGGTGTACTGGCTTGCCCCATTTGTT  
GGTGTGGAATTGCTGCTATTGTCTATGAAATCGTCTTCATTAACCAGACCACTCACGAGCCACTCCCCCTCCAGT  
GAGTAC**TAA**

**>OleurTIP1;2a**

MPFSRISVGSPAEASHPDTLKAALAEFISMVIFVFAGEGSGMAFAKLTDGGSSTPAGLIAAAIAHAFALFVAVSV  
AANISGGHVNPAVTFGAFVGGHLSLFKTIWIAQLLGAIVACLLLKFSTGGLETSAFALSTGVSSWNALVFEIV  
MTFGLVYTVYATAVDPKRGDIGIIAPIAIGFIVGANILAGGAFDGAASNPAVSFGPAVVSWTWDHSHVYWLGPV  
GAGIAAIVYEIVFINQTTHEPLPSSEY\*

## **OleurTIP1;2b Oleur061Scf0417g02009.1**

>Oleur061Scf0417:223466..225244 (- strand) class=gene length=1779

**>OleurTIP1;2b**

**ATG**CCTTTCTCAAGAATTTCCGTCGGAAGTCCGGCGGAGGCCAGCCATCCAGATACCCTGAAAGCCGCCTTAGCC  
GAATTCATTTCAATGGTAATTTTTGTATTGCTGGTGAAGGCTCTGGCATGGCTTTTG**TAAGTACTTGTGCCCT**  
**CATATTAGTTTTACAATTGTTCTTCTTGACAGAATTATTTGCTTACTTCTTGACAAAATGACACGTGGTATTC**  
**AATCATTAGACTATTTAAAAAACAGTTAATTTTTACCCAATCATTGCTGCCAACGTTGTATCTATTAAGTAGG**  
**TGGGCAGAAAATTCTGTACAAATGGCTAAATCCTAAGTTCTAAACACTTGTCCTTTATTCTATTCAATCTCATT**  
**ATTATCATTTTTTCTACAGCCAAGCTTACAGACGGTGGATCGAGCACGCCGGCCGGCCTTATTGCTGCGGCGATA**  
**GCCCATGCTTTTCGCACTTTTTGTGGCAGTCTCGGTTGCTGCCAACATTTCCGGTGGTCATGTAAACCTGCAGTC**  
**ACCTTCGGTGCCTTTGTTGGTGGTCACCTATCATTGTTTAAACTATTTTGTATTGGATTGCCCAATTGCTTGGA**  
**GCTATTGTTGCATGCTTGCTCCTAAAGTTCTCCACCGGTGGCTTGTAAGTAATTAATTCATCAAAGCTATATTA**  
**TTACACATAAAAGTTCTTCTTCATCATTTTTCTGAAATGTGGAAGAAGCAATGATGCGATTTTCATTAGAATT**  
**CTTGAAAAAATAAGGAAAATTCAAATTAATCTCTTCTACAGGAAACAAAAATAAAAGCAAAAGACTATACCTAA**  
**CGGACCCCTTAGAATCCCTGGCCTAGAGCATGTTTGGCTGGCTTAGCTTCAAAAGAAGTAAAGTTAATTTCTTT**  
**TCAAACATGTTAATAGAACTTATTTTCTTAATTTTAAAGTAAAGAACTATTTATTTAAAGACAATTTTACGCA**  
**TAAGAACCCTCCATGTTTTCATCTCCCAAGAATAAAAACTTGTCCTACTACAGAACTTACTTATTTCCATGCTTT**  
**TGTTGTGACCAGAACTCAAATTTTGCTTTGTACATCATGCAGGAACTTCCGCATTTGCATTTCAACCGGGTA**  
**TCGTCGTGGAATGCCCTTGTTTTCGAAATAGTGATGACGTTTGGACTGGTTTACACAGTTTATGCCACAGCAGTA**  
**GATCCAAAGAGGGGTGATATAGGTATCATAGCCCCTATTGCCATTGGCTTCATCGTGGGTGCCAACATTTTGGCC**  
**GGCGGTGCCTTTGACGGTGCATCCATGAACCCAGCCGTGTCGTTCCGCCCTGCAGTCGTTAGCTGGACATGGGAC**  
**AGCCACTGGGTGTACTGGCTTGCCCCATTTGTTGGTGTGGAATTGCTGCTATTGTCTATGAAATCGTCTTCATT**  
**AACCAGAGCACTCATGAGCCACTCCCCCTCCAGTGAGTAC****TAA**

**>OleurTIP1;2b**

**ATG**CCTTTCTCAAGAATTTCCGTCGGAAGTCCGGCGGAGGCCAGCCATCCAGATACCCTGAAAGCCGCCTTAGCC  
GAATTCATTTCAATGGTAATTTTTGTATTGCTGGTGAAGGCTCTGGCATGGCTTTTGCCAAGCTTACAGACGGT  
GGATCGAGCACGCCGGCCGGCCTTATTGCTGCGGCGATAGCCCATGCTTTTCGCACTTTTTGTGGCAGTCTCGGTT  
GCTGCCAACATTTCCGGTGGTCATGTAAACCTGCAGTCACCTTCGGTGCCTTTGTTGGTGGTCACCTATCATTG  
TTTAAAACTATTTTGTATTGGATTGCCCAATTGCTTGGAGCTATTGTTGCATGCTTGCTCCTAAAGTTCTCCACC  
GGTGGCTTGGAACCTTCCGCATTTGCACCTTCAACCGGGGTATCGTCGTGGAATGCCCTTGTTTTCGAAATAGTG  
ATGACGTTTGGACTGGTTTACACAGTTTATGCCACAGCAGTAGATCCAAAGAGGGGTGATATAGGTATCATAGCC  
CCTATTGCCATTGGCTTCATCGTGGGTGCCAACATTTTGGCCGGCGGTGCCTTTGACGGTGCATCCATGAACCCA  
GCCGTGTCGTTCCGGCCCTGCAGTCGTTAGCTGGACATGGGACAGCCACTGGGTGTACTGGCTTGCCCCATTTGTT  
GGTGTGGAATTGCTGCTATTGTCTATGAAATCGTCTTCATTAACCAGAGCACTCATGAGCCACTCCCCCTCCAGT  
GAGTAC**TAA**

**>OleurTIP1;2b**

MPFSRISVGSPAEASHPDTLKAALAEFISMVIFVFAGEGSGMAFAKLTDGGSSTPAGLIAAAIAHAFALFVAVSV  
AANISGGHVNPAVTFGAFVGGHLSLFKTIWIAQLLGAIVACLLLKFSTGGLETSAFALSTGVSSWNALVFEIV  
MTFGLVYTVYATAVDPKRGDIGIIAPIAIGFIVGANILAGGAFDGAASNPAVSFGPAVVSWTWDHSHVYWLGPV  
GAGIAAIVYEIVFINQSTHEPLPSSEY\*

## **OleurTIP1;3a Oleur061Scf4360g00007.1**

>Oleur061Scf1330:642994..644469 (- strand) class=gene length=1476

**>OleurTIP1;3a**

**ATG**TCTAGCGAGTTCTTTAACGTGCCACTCCGACGGGTTGCCTTTGGACATCGAGATGAGTTTCGCCAGCCCGGT  
GCTATCAAGGCGGCGCTAGCCGAGTTCTTCAGTACCCTGATTTTTGTGTTTGCTGGTGAGGGTTCCGGCATGGCT  
TACAACAAATTGACTGGGAATGCTCCTACCTCCCCATCCGGCCTTGTGGCAGCAGCGGTGGCTCATGGTTTTGCT  
TTGTTTGTAGCAGTTTCCGTCAGTGCTAACATTTCCGGCGGCCATGTAAACCCTGCCGTCACTTTTGGTTTGT  
CTTGGTGGAACGTCTCTCTCTTCCGTGGTATCCTTTACATAATTGCTCAGCTGCTGGGCTCTGTCTGCTTGC  
CTTCTCCTCTTGTCTCAACTGGTGGACTG**GTAAGTTTTAAAAATAAACAAATTCTTGGTCCTCCCAAACAATAA**  
**CAGCGGCTCCTAATTTATTGAATGAACTTCGATGCAG**GAAACATCTGCATTTGCTTTAACTGCCGGCGTGTCTGG  
TGTGGAACGCCTTTGTTTTTCGAGATTGTAATGACCTTTGGCCTGGTTTACACTGTGTACGCCACCGCTGTTGACC  
CAAAGAAGGGAGAAATTGGCATTATTGCACCAATTGCAATTGGTTTTCATCGTGGGTGCCAATATTCTGGCGGGTG  
GTGCATTTACCGGTGCTTCAATGAACCCTGCAGTGTCATTTGGTCCAGCTCTGGTCAGCTTCACCTGGACCCATC  
ACTGGGTGTACTGGGCTGGACCTCTTATTGGTGGTGGCCTTGCTGGTATTGTTTATGAAGTCTTCTTCATCAACC  
ATTCTCACGAACCCTTGCCAGGTTTCAGAGTAC**TGA**

**>OleurTIP1;3a**

**ATG**TCTAGCGAGTTCTTTAACGTGCCACTCCGACGGGTTGCCTTTGGACATCGAGATGAGTTTCGCCAGCCCGGT  
GCTATCAAGGCGGCGCTAGCCGAGTTCTTCAGTACCCTGATTTTTGTGTTTGCTGGTGAGGGTTCCGGCATGGCT  
TACAACAAATTGACTGGGAATGCTCCTACCTCCCCATCCGGCCTTGTGGCAGCAGCGGTGGCTCATGGTTTTGCT  
TTGTTTGTAGCAGTTTCCGTCAGTGCTAACATTTCCGGCGGCCATGTAAACCCTGCCGTCACTTTTGGTTTGT  
CTTGGTGGAACGTCTCTCTCTTCCGTGGTATCCTTTACATAATTGCTCAGCTGCTGGGCTCTGTCTGCTTGC  
CTTCTCCTCTTGTCTCAACTGGTGGACTGGAAACATCTGCATTTGCTTTAACTGCCGGCGTGTCTGGTGTGAAC  
GCCTTTGTTTTTCGAGATTGTAATGACCTTTGGCCTGGTTTACACTGTGTACGCCACCGCTGTTGACCCAAAGAAG  
GGAGAAATTGGCATTATTGCACCAATTGCAATTGGTTTTCATCGTGGGTGCCAATATTCTGGCGGGTGGTGCATTT  
ACCGGTGCTTCAATGAACCCTGCAGTGTCATTTGGTCCAGCTCTGGTCAGCTTCACCTGGACCCATCACTGGGTG  
TACTGGGCTGGACCTCTTATTGGTGGTGGCCTTGCTGGTATTGTTTATGAAGTCTTCTTCATCAACCATTCTCAC  
GAACCCTTGCCAGGTTTCAGAGTAC**TGA**

**>OleurTIP1;3a**

MSSEFFNVPLRRVAFGHRDEFRQPGAIIKAALAEFFSTLIFVFAGEGSGMAYNKL TGNAPTSPSGLVAAVAHGFA  
LFVAVSVSANISGGHVNPVTFGLFLGGNVSLFRGILYIIAQLLGSVVACL LLLFSTGGLETSAFALTAGVSVWN  
AFVFEIVMTFGLVYTVYATAVDPPKKGEIGIIAPIAIGFIVGANILAGGAFTGASMNPVVSFGPALVSFTWTHHWV  
YWAGPLIGGGLAGIVYEVFFINHSHEPLPGSEY\*

## **OleurTIP1;3b Oleur061Scf7549g01032.1**

**>Oleur061Scf4360:27330..28805 (+ strand) class=gene length=1476**

**>OleurTIP1;3b**

**ATG**TCTAGCGAGTTCTTTAACGTGCCACTCCGACGGGTTGCCTTTGGACATCGAGATGAGTTTCGCCAGCCCGGT  
GCTATCAAGGCGGCGCTAGCCGAGTTCTTCAGTACCCTGATTTTTGTGTTTGCTGGTGAGGGTTCCGGCATGGCT  
TACAACAAATTGACTGGGAATGCTCCTACCTCCCCATCCGGCCTTGTGGCAGCAGCGGTGGCTCATGGTTTTGCT  
TTGTTTGTAGCAGTTTCCGTCAGTGCTAACATTTCCGGCGGCCATGTAAACCCTGCCGTCACTTTTGGTTTGT  
CTTGGTGGAACGTCTCTCTCTTCCGTGGTATCCTTTACATAATTGCTCAGCTGCTGGGCTCTGTCTGCTTGC  
CTTCTCCTCTTGTCTCAACTGGTGGACTG**GTAAGTTTTAAAAATAAACAAATTCTTGGTCCTCCCAAACAATAA**  
**CAGCGGCTCCTAATTTATTGAATGAACTTCGATGCAG**GAAACATCTGCATTTGCTTTAACTGCCGGCGTGTCTGG  
TGTGGAACGCCTTTGTTTTTCGAGATTGTAATGACCTTTGGCCTGGTTTACACTGTGTACGCCACCGCTGTTGACC  
CAAAGAAGGGAGAAATTGGCATTATTGCACCAATTGCAATTGGTTTTCATCGTGGGTGCCAATATTCTGGCGGGTG  
GTGCATTTACCGGTGCTTCAATGAACCCTGCAGTATCATTGGTCCAGCTCTGGTCAGCTTCACCTGGACCCATC  
ACTGGGTGTACTGGGCTGGACCTCTTATTGGTGGTGGCCTTGCTGGTATTGTTTATGAAGTCTTCTTCATCAACC  
ATTCTCACGAACCCTTGCCAGGTTTCAGAGTAC**TGA**

**>OleurTIP1;3b**

**ATG**TCTAGCGAGTTCTTTAACGTGCCACTCCGACGGGTTGCCTTTGGACATCGAGATGAGTTTCGCCAGCCCGGT  
GCTATCAAGGCGGCGCTAGCCGAGTTCTTCAGTACCCTGATTTTTGTGTTTGCTGGTGAGGGTTCCGGCATGGCT  
TACAACAAATTGACTGGGAATGCTCCTACCTCCCCATCCGGCCTTGTGGCAGCAGCGGTGGCTCATGGTTTTGCT  
TTGTTTGTAGCAGTTTCCGTCAGTGCTAACATTTCCGGCGGCCATGTAAACCCTGCCGTCACTTTTGGTTTGT  
CTTGGTGGAACGTCTCTCTCTTCCGTGGTATCCTTTACATAATTGCTCAGCTGCTGGGCTCTGTCTGCTTGC  
CTTCTCCTCTTGTCTCAACTGGTGGACTGGAAACATCTGCATTTGCTTTAACTGCCGGCGTGTCTGGTGTGAAC  
GCCTTTGTTTTTCGAGATTGTAATGACCTTTGGCCTGGTTTACACTGTGTACGCCACCGCTGTTGACCCAAAGAAG  
GGAGAAATTGGCATTATTGCACCAATTGCAATTGGTTTTCATCGTGGGTGCCAATATTCTGGCGGGTGGTGCATTT  
ACCGGTGCTTCAATGAACCCTGCAGTATCATTGGTCCAGCTCTGGTCAGCTTCACCTGGACCCATCACTGGGTG  
TACTGGGCTGGACCTCTTATTGGTGGTGGCCTTGCTGGTATTGTTTATGAAGTCTTCTTCATCAACCATTCTCAC  
GAACCCTTGCCAGGTTTCAGAGTAC**TGA**

**>OleurTIP1;3b**

MSSEFFNVPLRRVAFGHRDEFRQPGAIIKAALAEFFSTLIFVFAGEGSGMAYNKL TGNAPTSPSGLVAAVAHGFA  
LFVAVSVSANISGGHVNPVTFGLFLGGNVSLFRGILYIIAQLLGSVVACL LLLFSTGGLETSAFALTAGVSVWN

AFVFEIVMTFGLVYTVYATAVDPPKKGEIGIIAPIAIGFIVGANILAGGAFTGASMNPVVSFGPALVSFTWTHHWV  
YWAGPLIGGGLAGIVYEVFFINHSHEPLPGSEY\*

### **OleurTIP1;3c Oleur061Scf0417g02009.1**

>Oleur061Scf7549:241767..243178 (- strand) class=gene length=1412

>**OleurTIP1;3c**

**ATG**TCTAGCGAGTTCTTTAACGTGCCACTCCGACGGGTTGCCTTTGGACATCGAGATGAGTTTCGCCAGCCCGGT  
GCTATCAAGGCGGCGCTAGCCGAGTTCTTCAGTACCCTGATTTTTGTGTTTGCTGGTGAGGGTTCCGGCATGGCT  
TACAACAAATTGACTGGGAATGCTCCTACCTCCCCATCCGGCCTTGTTGGCAGCAGCGGTGGCTCATGGTTTTGCT  
TTGTTTGTAGCAGTTTCCGTCAGTGCTAACATTTCCGGCGGCCATGTAAACCCTGCCGTCACTTTTGGTTTGTTT  
CTTGGTGGAACGTCTCTCTCTTCCGTGGTATCCTTTACATAATTGCTCAGCTGCTGGGCTCTGTCGTTGCTTGC  
CTTCTCCTCTTGTTCTCAACTGGTGGACTG**GTAAGTTTTAAAAATAAACAAATTCTTGGTCCTCCCAAACAATAA**  
**CAGCGGCTCCTAATTTATTGAATGAACTTCGATGCAGGAAACATCTGCATTTGCTTTAACTGCCGGCGGTGTCGG**  
TGTGGAACGCCTTTGTTTTTCGAGATTGTAATGACCTTTGGCCTGGTTTACACTGTGTACGCCACCGCTGTTGACC  
AAAAGAAGGGAGAAATTGGCATTATTGCACCAATTGCAATTGGTTTCATCGTGGGTGCCAATATTCTGGCGGGTG  
GTGCATTTACCGGTGCTTCAATGAACCCTGCAGTATCATTGGTCCAGCTCTGGTCAGCTTCACCTGGACCCATC  
ACTGGGTGTACTGGGCTGGACCTCTTATTGGTGGTGCCCTTGCTGGTATTGTTTATGAAGTCTTCTTCATCAACC  
ATTCTCACGAACCTTGCCAGGTTCCAGAGTAC**TGA**

>**OleurTIP1;3c**

**ATG**TCTAGCGAGTTCTTTAACGTGCCACTCCGACGGGTTGCCTTTGGACATCGAGATGAGTTTCGCCAGCCCGGT  
GCTATCAAGGCGGCGCTAGCCGAGTTCTTCAGTACCCTGATTTTTGTGTTTGCTGGTGAGGGTTCCGGCATGGCT  
TACAACAAATTGACTGGGAATGCTCCTACCTCCCCATCCGGCCTTGTTGGCAGCAGCGGTGGCTCATGGTTTTGCT  
TTGTTTGTAGCAGTTTCCGTCAGTGCTAACATTTCCGGCGGCCATGTAAACCCTGCCGTCACTTTTGGTTTGTTT  
CTTGGTGGAACGTCTCTCTCTTCCGTGGTATCCTTTACATAATTGCTCAGCTGCTGGGCTCTGTCGTTGCTTGC  
CTTCTCCTCTTGTTCTCAACTGGTGGACTGGAAACATCTGCATTTGCTTTAACTGCCGGCGGTGTCGGTGTGGAAC  
GCCTTTGTTTTTCGAGATTGTAATGACCTTTGGCCTGGTTTACACTGTGTACGCCACCGCTGTTGACCAAAAGAAG  
GGAGAAATTGGCATTATTGCACCAATTGCAATTGGTTTCATCGTGGGTGCCAATATTCTGGCGGGTGGTGCAATT  
ACCGGTGCTTCAATGAACCCTGCAGTATCATTGGTCCAGCTCTGGTCAGCTTCACCTGGACCCATCACTGGGTG  
TACTGGGCTGGACCTCTTATTGGTGGTGCCCTTGCTGGTATTGTTTATGAAGTCTTCTTCATCAACCATTCTCAC  
GAACCTTGCCAGGTTCCAGAGTAC**TGA**

>**OleurTIP1;3c**

MSSEFFNVPLRRVAFGHRDEFRQPGAIIKAALEFFSTLIFVFAGEGSGMAYNKLIGNAPTSPSGLVAAVAHGFA  
LFVAVSVSANISGGHVNPAVTFGLFLGGNVSLFRGILYIIAQLLGSVVACLILLFSTGGLETSFAFALTAGVSVWN  
AFVFEIVMTFGLVYTVYATAVDQKKGEIGIIAPIAIGFIVGANILAGGAFTGASMNPVVSFGPALVSFTWTHHWV  
YWAGPLIGGGLAGIVYEVFFINHSHEPLPGSEY\*

### **OleurTIP1;3d Oleur061Scf0466g03012.1**

>Oleur061Scf0466:372836..374085 (- strand) class=gene length=1250

>**OleurTIP1;3d**

**ATG**TCTAGCGAGTACTTTAACGTCCTGTTCCGCCATGTTGCCATCGGAAATCAAGATGATTTCCGCCAGGCCGGC  
GCTATCAAGGCGGCGCTGGCTGAGTTCTTCAGTACCCTTATTTTTGTGTTTCGCCGGTGAGGGTTCCGGCATGGCA  
TACAACAAGTTGACTTGGAATGCTCCTACCTCCCCCTCCGGCCTTGTTGGTAGCGGCGGTAGCTCATGCTTTTGGT  
TTGTTTGTGGCTGTTTCTATCAGTGCTAACATTTCCGGCGGTCATGTCAACCCTGCCGTCACTTTTCGGTTTGTTT  
CTTGGTGGAACATCTCTTTGTTTCAGAGGTATCCTTTACATCATCGCTCAATTGCTGGGATCTGTTGTGGCTTGT  
CTTCTCCTTTTGTCTCAACTGGTGGACTG**GTAATTTTTAGAAAGAACATTAATTTTTTATCAACTTAGGTACGT**  
**GTTTAATAATTGTGACTCCTATTTATCTACTGAACTTTGATGCAGGAAACATCTGCATTTGCTTTGGGTGCCAA**  
CGTGTCTGTGTGGAACGCCTTTGTATTTGAGATTGTGATGACTTTTGGCCTGGTTTACACTGTGTACGCCACCGC  
GATTGACCCGAAGAAGGGAGAAGTTGGCATTATTGCACCAATTGCAATTGGTTTCATTGTGGGGGCCAACATTCT  
TGCTGGTGGTGCATTTACTGGTGTCTTCAATGAACCCTGCAGTGTCAATTGGCCCTGCTCTGGTTAGCTTCACCTG  
GACCCATCACTGGGTATACTGGGCTGGACCTCTAATTGGTGGGGGACTTGCTGGTATTGTTTATGAAGTCTTCTT  
CATCAGTCATTCTACGAGCCACTGCCCGGATCGGAGTAC**TGA**

>**OleurTIP1;3d**

**ATG**TCTAGCGAGTACTTTAACGTCCTGTTCCGCCATGTTGCCATCGGAAATCAAGATGATTTCCGCCAGGCCGGC  
GCTATCAAGGCGGCGCTGGCTGAGTTCTTCAGTACCCTTATTTTTGTGTTTCGCCGGTGAGGGTTCCGGCATGGCA  
TACAACAAGTTGACTTGGAATGCTCCTACCTCCCCCTCCGGCCTTGTTGGTAGCGGCGGTAGCTCATGCTTTTGGT  
TTGTTTGTGGCTGTTTCTATCAGTGCTAACATTTCCGGCGGTCATGTCAACCCTGCCGTCACTTTTCGGTTTGTTT

CTTGGTGGAAACATCTCTTTGTTTCAGAGGTATCCTTTACATCATCGCTCAATTGCTGGGATCTGTTGTGGCTTGT  
CTTCTCCTTTTGTCTCAACTGGTGGACTGGAAACATCTGCATTTGCTTTGGGTGCCAACGTGTCTGTGTGGAAC  
GCCTTTGTATTTGAGATTGTGATGACTTTTGGCCTGGTTTACACTGTGTACGCCACCGCGATTGACCCGAAGAAG  
GGAGAAGTTGGCATTATTGCACCAATTGCAATTGGTTTCATTGTGGGGGCCAACATTCTTGCTGGTGGTGCATTT  
ACTGGTGTCTCAATGAACCCTGCAGTGTCAATTTGGCCCTGCTCTGGTTAGCTTCACCTGGACCCATCACTGGGTA  
TACTGGGCTGGACCTCTAATTGGTGGGGACTTGCTGGTATTGTTTATGAAGTCTTCTTCATCAGTCATTCTCAC  
GAGCCACTGCCCCGATCGGAGTAC**TGA**

**>OleurTIP1;3d**

MSSEYFNVLFVRHVAIGNQDDFRQAGAIKAALAEFFSTLIFVFAGEGSGMAYNKLWNAPTSPSGLVVAVAHAHAFG  
LFVAVSISANISGGHVNPAVTFGLFLGGNISLFRGILYIIAQLLGSVVACLILLFSTGGLETSALFALGANVSVWN  
AFVFEIVMTFGLVYTVYATAIDPKKGEVGIIAPIAIGFIVGANILAGGAFTGASMPNPAVSFGPALVSFTWTHHWV  
YWAGPLIGGGLAGIVYEVFFISHSHEPLPGSEY\*

## **OleurTIP1;3e Oleur061Scf3806g00010.1**

>Oleur061Scf3806:21034..22285 (+ strand) class=gene length=1252

**>OleurTIP1;3e**

**ATG**TCTAGCGAGTACTTTAACTGCCGTTCCGCCATGTTGCCATCGGAAATCAAGATGATTTCCGCCAGCCCGGC  
GCTATCAAGGCTGCGCTGGCTGAGTTCTTCAGTACCCTTATTTTGTGTTTGCCGGTGAGGGTTCCGGCATGGCA  
TACAACAAGTTGACTTGGAACGCTCCTACCTCCCCCTCCGGCCTTGTGGTAGCGGCGGTAGCTCATGCTTTTGGT  
TTGTTTGTGGCTGTTTCTATCAGTGCTAACATTTCCGGCGGTATGTCAACCCTGCCGTCACCTTTCGGTTTGT  
CTTGAGGAAACATCTCTTTGTTTCAGAGGTATCCTTTACATCATCGCTCAGTTGCTGGGATCTGTTGTTGCTTGT  
CTTCTCCTTTTGTCTCAACTGGTGGACTG**GTAATTTT**AGAAAGAACATTAATTTT**TATCAACTTAGGTACGT**  
**GTTTAATAATTGTGACTCCTATTTATCTACTGAACTTTGATGCAG**AAACATCTGCATTTGCTTTGGGTGCCAA  
CGTGTCTGTGTGGAACGCCTTTGTATTTCAGAGATTGTGATGACTTTTGGCCTGGTTTACACTGTGTACGCCACCGC  
GATTGACCCGAAGAAGGGAGAAGTTGGCATTATTGCACCAATTGCAATTGGTTTCATTGTGGGTGCCAACATTCT  
TGCTGGTGGGGCATTTACTGGTGTCTCAATGAACCCTGCAGTGTCAATTTGGCCCTGCTCTGGTTAGCTTCACCTG  
GACCCATCACTGGGTATACTGGGCTGGACCTCTAATTGGTGGTGGACTTGCTGGTATTGTTTATGAAGTCTTCTT  
CATCAGTCATTCTACGAGCCACTGCCCCGATCGGAGTAC**TGA**

**>OleurTIP1;3e**

**ATG**TCTAGCGAGTACTTTAACTGCCGTTCCGCCATGTTGCCATCGGAAATCAAGATGATTTCCGCCAGCCCGGC  
GCTATCAAGGCTGCGCTGGCTGAGTTCTTCAGTACCCTTATTTTGTGTTTGCCGGTGAGGGTTCCGGCATGGCA  
TACAACAAGTTGACTTGGAACGCTCCTACCTCCCCCTCCGGCCTTGTGGTAGCGGCGGTAGCTCATGCTTTTGGT  
TTGTTTGTGGCTGTTTCTATCAGTGCTAACATTTCCGGCGGTATGTCAACCCTGCCGTCACCTTTCGGTTTGT  
CTTGAGGAAACATCTCTTTGTTTCAGAGGTATCCTTTACATCATCGCTCAGTTGCTGGGATCTGTTGTTGCTTGT  
CTTCTCCTTTTGTCTCAACTGGTGGACTGGAAACATCTGCATTTGCTTTGGGTGCCAACGTGTCTGTGTGGAAC  
GCCTTTGTATTTCAGAGATTGTGATGACTTTTGGCCTGGTTTACACTGTGTACGCCACCGCGATTGACCCGAAGAAG  
GGAGAAGTTGGCATTATTGCACCAATTGCAATTGGTTTCATTGTGGGTGCCAACATTCTTGCTGGTGGGGCATTT  
ACTGGTGTCTCAATGAACCCTGCAGTGTCAATTTGGCCCTGCTCTGGTTAGCTTCACCTGGACCCATCACTGGGTA  
TACTGGGCTGGACCTCTAATTGGTGGTGGACTTGCTGGTATTGTTTATGAAGTCTTCTTTCATCAGTCATTCTCAC  
GAGCCACTGCCCCGATCGGAGTAC**TGA**

**>OleurTIP1;3e**

MSSEYFNVFPFRHVAIGNQDDFRQPGAIIKAALAEFFSTLIFVFAGEGSGMAYNKLWNAPTSPSGLVVAVAHAHAFG  
LFVAVSISANISGGHVNPAVTFGLFLGGNISLFRGILYIIAQLLGSVVACLILLFSTGGLETSALFALGANVSVWN  
AFVFEIVMTFGLVYTVYATAIDPKKGEVGIIAPIAIGFIVGANILAGGAFTGASMPNPAVSFGPALVSFTWTHHWV  
YWAGPLIGGGLAGIVYEVFFISHSHEPLPGSEY\*

## **OleurTIP1;5 Oleur061Scf7653g04013.1**

>Oleur061Scf7653:468560..470420 (- strand) class=gene length=1861

**>OleurTIP1;5**

**ATG**CCGATTTTCGAGAATAGCTGTCCGATCTCTGGCCGAGGCTAGTCAGCCGGAAGCCCTCAAGGCCACCCCTGGCC  
GAGTTCATTTTCGATGTTGATTTTGTGTTTGTCTGGTGAAGGTTCTGGCATGGCTTTCG**GTAAGTAGTTATCCTGT**  
**ACAAATTCATTTAAAGTTTAAAGTTGTTAGAATTCGAGTATTAAATCATCGGGATTTTGACTTTTCCACAG**CAA  
AGCTTACAAACAATGGATCGACCACGCCAACTGGCCTAATTGCTGAGGCGATAGCGCACGCTTTTGCACTTTTCG  
TGGCGGTTCCGTTCCGTTGATCTCTGCGCGGACAGTAACCCCTGCTGTACCTTTGGTGCCTTTGTTGGTG  
GTCACATCACATTGATTAGGAGCATCCTGTGATCGGATGAGCCCAATTACTTGGATCTGTTGTTGCATGCTGTGCTC  
TTAGGTTAGCCACAGGCGGACTC**GTAAGTTGAATCTTACTGTACTATCCAGTCAAGTCGAGTCCATAACTATAAC**  
**AAATAGGCTAAAGTTCAATTCTTGTGTTACAGGAAACATCAGCTTTTGCACCTTTCATCTGGAGTGACAGTTTGAA**

TGCAGTTGTTTTTGGAGATAGTGATGACCTTTGGACTCGTTTACACAGTTTATGCTACTGCAGTGGATCCAAAGAG  
GGGTAACCTTAGGGATCATTGCCCCATTGCCATTGGCTTCATTGTAGGCGCTAACATCTTAGCCGGTGGTGCCTT  
CGATGGTGCCTCCATGAACCCCGCCGTGTCTTTTGGCCCTGCTGTGGTCAGCTGGACATGGGACAGCCACTGGGT  
CTTCTGGCTCGGCCCCGTTTGTGGTGTGGAATTGCTGCTCTGATCTATGAAATCTTGTTCATTAACCAAAGCCA  
TGAACAACCTCCGTACTAGTGCAGAATACT**TAA**

>*OleurTIP1*;5

**ATG**CCGATTTTCGAGAATAGCTGTGCGATCTCTGGCCGAGGCTAGTCAGCCGGAAGCCCCCAAGGCCACCCCTGGCC  
GAGTTCATTTTCGATGTTGATTTTTGTTTTTGGCTGGTGAAGGTTCTGGCATGGCTTTTCGCAAAGCTTACAAACAAT  
GGATCGACCACGCCAACTGGCCTAATTGCTGAGGCGATAGCGCACGCTTTTGCACCTTTTCGTGGCGGTTTCGGTTC  
GGTGCTAACATCTCTGGCGGCCACGTAAACCCTGCTGTACCTTTGGTGCCTTTGTTGGTGGTCACATCACATTG  
ATTAGGAGCATCCTGTACTGGATAGCCCAATTACTTGGATCTGTTGTTGCATGCTTGCTTCTTAGGTTAGCCACA  
GGCGGACTCGAAACATCAGCTTTTGCACCTTTCATCTGGAGTGACAGTTTGAATGCAGTTGTTTTTGAGATAGTG  
ATGACCTTTGGACTCGTTTACACAGTTTATGCTACTGCAGTGGATCCAAAGAGGGGTAACCTTAGGGATCATTGCC  
CCCATTGCCATTGGCTTCATTGTAGGCGCTAACATCTTAGCCGGTGGTGCCTTCGATGGTGCCTCCATGAACCCC  
GCCGTGTCTTTTGGCCCTGCTGTGGTCAGCTGGACATGGGACAGCCACTGGGTCTTCTGGCTCGGCCCCGTTTGTG  
GGTGTGGAATTGCTGCTCTGATCTATGAAATCTTGTTCATTAACCAAAGCCATGAACAACCTCCGTACTAGTGCA  
GAATACT**TAA**

>*OleurTIP1*;5

MPISRIAVGSLAEASQPEALKATLAEFISMLIFVFACEGSGMAFAKLNNSTPTGLIAEIAIAHAFALFVAVSV  
GANISGGHVNPAVTFGAFVGGHITLIRSILYWIAQLLGSVVACLLLRATGGLETSALSSGVTVWNAVVFIV  
MTFGLVYTVYATAVDPKRNGLGIIAPIAIGFIVGANILAGGAFDASMNPVSVFPAVVSWTWDHSHVFWLGPV  
GAGIAALIYEILFINQSHEQLRTSAEY\*

## *OleurTIP1*;6 *Oleur061Scf5512g00068.1*

>*Oleur061Scf5512*:141526..147261 (- strand) class=gene length=5736

>*OleurTIP1*;6

**ATG**CCGATTTATCGGATTGCGATTGGGACGCCTGGAGAAGCGAGCCACCCCGATGCACTCAAGGCCGCGCTTGCT  
GAGTTCCTCTCTATGCTTATTTTTGTTTTTGGCTGGTCAAGGCTCCGGGATGGCTTTT**GTACGTTTCGCTCTTTCT**  
**CCTCTACATCTATTTATATTCCGTTGATACGAAACAATGATTTGAATTAATGGAGACTCTAGGAATCCCACTTTC**  
**TTCAATTTGATATTTGATGGGCTAGTGTGAGATTATCGGATAATATTTTTCTTAAAGATCCTGGCTTAATCTTCC**  
**CTGGAAAGACACGTATGAGATCTTCAATTTTTGGGAGTTTTTCTATGCGATCATTTTTCAATCTTCTGTTGCTG**  
**GTATCTCATTTCGTGTACATTATTTCTTTATTTTTTCGATCTTCTAACGTAAACGTTTGATGATTGTATCATATTA**  
**TGGCAGATAAGTTGAGCAATGATGGGTACCAAATCCATCAGGACTGCTAGCTGCAGCATTAGCCCATGCATTTG**  
**CACTTTTTGTGGCAGTCTCAGTAGGTGCAAACATATCAGGGGGTCATGTGAATCCTGCTGTCACGTTTGGTGCTT**  
**TCATTGGTGGGAACATAACACTTTTGAGGAGCATTGTGACTGGATTGCTCAATTACTTGGCTCTGTTGTTGCCT**  
**GCATACTTCTTAAGTTTGCTACTGGAGGATTG**GTAAAGAAAGTTGATCGTTTTACGACAAATTTGCTTCCAACT****  
**ACGAAAATTTTTGGTGTAATAAATCATTGATTGTTTCGTAAAAATAGGGTCGTTGAGAGAACTTCTTTTCGTTGT**  
**TAAATGTGAAATTTCTTGATAGCTTAATTCAGTGCATTAATCAACAATGATTTGCTTCCGTTACTGGAATTTT**  
**ACAAATTTTAGTCTTTTCATTGTCTGAACCTAGAATATATGTAAGAATTTATACATGTTTGGAGAAAAAGGAGAA**  
**CAAGATAGATGGCGATGCCCTCCCAAGTAAATCTAGACATACCTGAGTATTAGAGAATATACAATTCATGTCTAG**  
**ATGGTTTGAAATTCAAACAAAAATAGAAATGGAAATTTGGTAAAAATTTGAAGAGCCCATCTCATTTCCTCGTC**  
**TTTTACTCGTGTAAGTAAATAATAAGGCTTTAGGGCATTATACACTTTCTTAAACATAACATTACCTCCCCAAT**  
**CCAAGAGACAAGTTATCTTGAGGAGTATGCAACAAACCTCAATACTTTCTATCATAAAGTTGTAATAGATAATT**  
**AAATATGTATTTATTGTAATTATTTATGCAAGTGAAAAATAAATGTGGCAAAATATATTGAAGTACCAAGTAAAAA**  
**GTTATACATTCTAATCTTTCTTCTCTCTTTTGACGTGGGACCTTGTTTATTTCAATTTTATGACAATCTACTT**  
**CAACATGTACGTTTCACGATTTTCGTGGGATGAAATCGACATATGAGCCAACCTTATATATTGCAGGAAACATCAGC**  
**ATTTGCCTTGTCGTCCGGTGTCTGTGTGGAACGCCCTAGTTTTTGGAGATTGTGATGACCTTCGGGCTGGTGTA**  
**TACGGTGTATGCTACTGCAGTGGATCCAAAAAAGGGTAATTTGGGAAACATTGCACCCATTGCAATTGGGTTTCAT**  
**TGTGGGTGCCAATATCTTAGCAGGTGGTCCATTTGATGGTGCATCAATGAACCCAGCAGTCTCCTTTGGACCAGC**  
**TGTGGTCAGTTGGAATTTTACAAACCATTGGGTGTATTGGATAGGCCCTTCATTGGTGCCACTATTGCAGCACT**  
**TGTCTATGATAACATCTACATCGATGGTGAGACACATGAGCAGCTTCCAGTTACAGACTAT**TAG****

>*OleurTIP1*;6

**ATG**CCGATTTATCGGATTGCGATTGGGACGCCTGGAGAAGCGAGCCACCCCGATGCACTCAAGGCCGCGCTTGCT  
GAGTTCCTCTCTATGCTTATTTTTGTTTTTGGCTGGTCAAGGCTCCGGGATGGCTTTTAAATAAGTTGAGCAATGAT  
GGGTACCAAAATCCATCAGGACTGCTAGCTGCAGCATTAGCCCATTTGCACCTTTTGTGGCAGTCTCAGTA  
GGTGCAACATATCAGGGGTCATGTGAATCCTGCTGTACAGTTTGGTGCCTTTTCATTGGTGGGAACATAACACTT  
TTGAGGAGCATTTTGTACTGGATTGCTCAATTACTTGGCTCTGTTGTTGCCTGCATACTTCTTAAAGTTTGCTACT  
GGAGGATTGGAACATCAGCATTTCCTTGTCGTCCGGTGTCTGTGTGGAACGCCCTAGTTTTTGGAGATTGTG  
ATGACCTTCGGGCTGGTGTATACGGTGTATGCTACTGCAGTGGATCCAAAAAAGGGTAATTTGGGAAACATTGCA  
CCCATTGCAATTGGGTTTCATTGTGGGTGCCAATATCTTAGCAGGTGGTCCATTTGATGGTGCATCAATGAACCCA

ATGCCGGTCAGCAGGATAGCGGTGGGGAGGCTGGAAGAGGCGACTCAGCAGGACGCCCTTGAAGCGGCATTGGCT  
GAGTTCATATCAACCCTAATATTTGTGTTTGTGGCTCAGGTTTCAAGCATGGCCCTTCAACAAGCTAACAGACGAC  
GGAGCCACCACTCCGGCAGGCCTCATTTGCAGTGCAGTGGCCCATGCATTTGCACTTTTCTGGCTGTTTCCGTT  
GGTGCCAAACATTTCCGGTGGCCATGTTAAACCTGCTGTCCTTGTCGGTGGAATAATTAGCCTTATCCGTGGTATCC  
TCTACTGGATTGCTCAGTTGCTTGGTTCTGTCGTTGCTTGCCTTCTCAAGTTTCGCCACCGGTG**GTTTTGGTGA**  
**GTTTTTTCGCCCTCTTTCGCTGAAAAATTCTGTCTCTGTTTTACAATAATCACTTTCGTCTAAAAAGCTCAAGTTAACGA**  
**AAAACATTCACCCCAATTTGTAAATTTTATTTTTCAG**ACTACTGCAGCCCTTTTCATTTGTCAGCTGGAGTCAACGTAT  
GGAATGCATTTGTATTAGAAATTTGTGATGACCTTTGGGCTAGTCTACACCGTACGCCACCGCATGGATCCAA  
AGAGGGGCAGTTTGGGAACAATTTGCACCAATTTGCTATTGGTTTCATTGTTGGGTGCCAACATCTTAGCTGGTGGGG

CCTTTGATGGGGCCTCAATGAACCCAGCAGTGTTCATTTCGGCCCAGCTGTGGTGAGCTGGACCTGGGACAACCACT  
GGGTCTATTGGGCCGGGCCTCTAATTGGTGGTGGGCTTGCTGGGCTTATCTATGAGTTCTTCTTCATTAACCAAA  
CCCATGAACAGTTGCCTACAACCTGATCAT**TAA**

>**OleurTIP1;7b**

**ATG**CCGGTCAGCAGGATAGCGGTGGGGAGGCTGGAAGAGGCGACTCAGCAGGACGCCTTGAAGGCGGCATTGGCT  
GAGTTCATATCAACCCTAATATTTGTGTTTGTCTGGCTCAGGTTTCAGGCATGGCCTTCAACAAGCTAACAGACGAC  
GGAGCCACCCTCCGGCAGGCTCATTGCAGCTGCAGTGGCCCATGCATTTGCACTTTTCGTGGCTGTTTCCGTT  
GGTGCCAACATTTCCGGTGGCCATGTTAACCTGCTGTCTTGTCTGGTGGAAATATTAGCCTTATCCGTGGTATCC  
TCTACTGGATTGCTCAGTTGCTTGGTTCTGTCTGTTGCTTGTCTTCTCAAGTTTCGCCACCGGTGACTACTGCA  
GCCTTTTTCATTGTCTCAGCTGGAGTCAACGTATGGAATGCATTTGTATTAGAAATTGTGATGACCTTTGGGCTAGTC  
TACACCGTGTACGCCACCGCAGTGGATCCAAAGAGGGGCGAGTTTGGGAACAATTGCACCAATTGCTATTGGTTTC  
ATTGTGGGTGCCAACATCTTAGCTGGTGGGGCCTTTGATGGGGCCTCAATGAACCCAGCAGTGTTCATTTCGGCCCA  
GCTGTGGTGAGCTGGACCTGGGACAACCACTGGGTCTATTGGGCCGGGCTCTAATTGGTGGTGGGCTTGCTGGG  
CTTATCTATGAGTTCTTCTTCATTAACCAAAACCCATGAACAGTTGCCTACAACCTGATCAT**TAA**

>**OleurTIP1;7b**

MPVSRIAVGRLEEATQQDALKAAALAEFISTLIFVFAGSGSGMAFNKLTDDGATTPAGLIAAAVAHAFALFVAVSV  
GANISGGHVNPAVLVSVEILALSUVSSTGLLSCLVLSLLACFSSSPVTTAAFSLSAGVNVWNAFVLEIVMTFGLV  
YTVYATAVDPKRSLGTIPIAIGFIVGANILAGGAFDGAASNPAVSFGPAVVSWTWDNHVWYVAGPLIGGGLAG  
LIYEFFFFINQTHEQLPTTDH\*

## **OleurTIP2;1 Oleur061Scf1395g09059.1**

>Oleur061Scf1395:971893..975231 (+ strand) class=gene length=3339

>**OleurTIP2;1**

**ATG**CCTGCAATTGCTGTCTCGGAAGATTAGATGATTCATTTAGCATTGGTTTCGTTGAAGGCCTATGTAGCTGAATTC  
ATCTCCACCTTGCTCTTTGTTTTTCGCCGGAGTCGGCTCCGCCATTGCCTACAG**TTAGTTCTAAAACCGTTTCTT**  
**ATTTTTTTTTAAGTTAACAAGCACTTGGTAACATTTTGATCTTTGACAGACAAGTTGACGGCGGACGCAGCTCTTG**  
ATCCGGCGGGGCTGGTGGCTGTGGCCATCTGCCATGGTTTTCGCTCTGTTTGTAGCCGCTCTCGATCGGAGCCAACA  
TCTCCGGTGGCCATGTAAACCCTGCAGTCACCTTTGGTTTGGCTGTTGGCGGCCAAATTACGCTACTTACTGGCC  
TCTTTTACTGGATTGCTCAACTTTTGGGCTCCATTGTGGCATGCTATTTACTCGTATTCGTAACCGGAGGATT**GG**  
**TATGTCACCCCAAAATAATATTTTAAATTCGAGTCGGTTTTTATTTACAGAGTTTTTATAGTCCGATTCTTGAT**  
**TTCTCTGGCTAAACTACCCGATTAGTTTCGATTCTTAACAAAATATATAATTTTCATGCAGGCTATTCCAATTCA**  
GGAGTTGGTGTGGTGTGGAGCCTTTGAAGGAGTTGTTATGGAAATTGTTATCACATTTGCTTTAGTCTATACT  
GTGTATGCGACAGCAGCTGATCCAAAGAAGGGCTCATTGGGCACAATTGCACCCATAGCCATTGGTTTTCATTGTT  
GGTGCCAATATTTTGGCTGCCGGTCCATTTTCAGGTGGGTCGATGAACCCTGCCCGCTCCTTCGGACCGGCTGTG  
GCCAGCGGCAACTTCTCCGGCATCTGGATTTACTGGGTTGGACCCCTCATTGGTGGTGGCCTCGCCGGTCTCGTC  
TACGCCTATGTGTTTCATGTCCCACGAGCATGCTCCCCTACCTACCGACTTT**TAA**

>**OleurTIP2;1**

**ATG**CCTGCAATTGCTGTCTCGGAAGATTAGATGATTCATTTAGCATTGGTTTCGTTGAAGGCCTATGTAGCTGAATTC  
ATCTCCACCTTGCTCTTTGTTTTTCGCCGGAGTCGGCTCCGCCATTGCCTACAACAAGTTGACGGCGGACGCAGCT  
CTTGATCCGGCGGGGCTGGTGGCTGTGGCCATCTGCCATGGTTTTCGCTCTGTTTGTAGCCGCTCTCGATCGGAGCC  
AACATCTCCGGTGGCCATGTAAACCCTGCAGTCACCTTTGGTTTGGCTGTTGGCGGCCAAATTACGCTACTTACT  
GGCCTCTTTTACTGGATTGCTCAACTTTTGGGCTCCATTGTGGCATGCTATTTACTCGTATTCGTAACCGGAGGA  
TTGGCTATTCCAATTTCATGGAGTTGGTGTGGTGTGGAGCCTTTGAAGGAGTTGTTATGGAAATTGTTATCACA  
TTTGCTTTAGTCTATACTGTGTATGCGACAGCAGCTGATCCAAAGAAGGGCTCATTGGGCACAATTGCACCCATA  
GCCATTGGTTTTCATTGTTGGTGCCAATATTTTGGCTGCCGGTCCATTTTCAGGTGGGTCGATGAACCCTGCCCGC  
TCCTTCGGACCGGCTGTGGCCAGCGGCAACTTCTCCGGCATCTGGATTTACTGGGTTGGACCCCTCATTGGTGGT  
GGCCTCGCCGGTCTCGTCTACGCCTATGTGTTTCATGTCCCACGAGCATGCTCCCCTACCTACCGACTTT**TAA**

>**OleurTIP2;1**

MPAIAVGRLLDSFSIGSLKAYVAEFISTLLFVFAGVGSIAIYNKLTADAALDPAGLVAVAICHGFALFVAVSIGA  
NISGGHVNPAVTFGLAVGGQITLLTGFLFYWIAQLLGSIVACYLLVFTGGLAIPIHGVGAGVGAFEGVMEIVIT  
FALVYTVYATAADPKKSLGTIPIAIGFIVGANILAAGPFSGSGSMNPARSFGPAVASGNFSGIWIYVWGPLIGG  
GLAGLVYAYVFMSEHAPLPTDF\*

## **OleurTIP2;3a Oleur061Scf5616g00030.1**

>Oleur061Scf5616:47019..49189 (- strand) class=gene length=2171

>**OleurTIP2;3a**

**ATG**CCAACCATTGCCTTCGGACGAATCGATGATTCATTAAGCGTTGGCTCTTTGAAGGCCTATTTAGCCGAATTC  
ATCTCGACTTTTGCTCTTCGTCTTCGCTGGAGTCGGCTCAGCCATTGCTTACA**GTTAGTCATCACTTCTTTTTCC**  
TTTAATAAAGTAAGATTTGATGCAGCACAATTCACACGAATCCCTCTCCCTGTACAAATCATTTCAGAGGGAGGAA  
AATACGCAGAATTCTTCGTTAGATCGGATCTATTAGACTCATTCTTTGGTGTTTCTCACTCTTTCACACACGCTA  
GGTGTGAGAGATTGATGCATAAAATAAAATTAACCCTAGCCATGCAATGCAGCTTGTGATTATAAATGTTGGTTT  
CGTATACAGTTCTAATTTGTGGGTATGTTTGATATTCTATTT**CGACAG**ACAAGTTGACATATGATGCGGCTCTCG  
ACCCAGCGGGGCTGGTAGCGGTGGCGGTCTGCCACGGATTGCTCTGTTTGTGGCGGTTTCGATCGGAGCCAACA  
TCTCCGGTGGCCATGTAAACCCTGCAGTCACCTTTGGTTTGGCTGTTGGTGGCCAAATTACAATTCTCACTGGCC  
TCTTCTATTGGATTGCTCAACTTTTGGGCTCCATTGTAGCATGCTTCTTGCTCAAATTTGTACACAGGTGGCTTGG  
TAAGTTGTTGTTCTATAATTATGTTATTTCATGAATTCTTTTCTAACTTCCTTCAAATGTGAGAGAGGGGATAAGA  
TTATGTCTTGATACGTCCCATCACGTACATTCTTTTTTTTTTTTTTTTTTAATCAAAAGTTGACGCGTACACAA  
TTTCCGTAAATAAATAAATAAGATTTTAAATCTCTGACTTTAAAGTTCTAATGCCATTTTGACTAAATCTAAAG  
TTCATATCTAATCTAAACATACATTCTCAAAAACATAAACTGATTAATTGTACTCTTTTTCAACTTTCACACAA  
AGAATAGTAAATCTTCACCATGTGTAGTTCATATTGCTTTGAATAAAAATGCTAACACGTGCACAATTTTCATA  
AATGAATGACAACAAAATTTAACTTGGTTCCCTCTATGTGTTCTCTACAATTTTGACTCGATCTAAAAAGTTTACA  
ACTGATCTAAGCTTACAGTACAAATGAGAATTGTATTCTTTTTCGACTTTCAACACGTTATATTAAGAATAATC  
GATCTTGAATGATTTCTATAACAAGTGTCTAATTATGTTTGTAAATTTGATGATTAATTTCTATGTAGGCCATT  
CAACTCACAGTATGGCAGCTGGTGTGGAGCCATTGAAGGAGTTGTGATGGAAATTGTTATCACTTTTGCTTTGG  
TGTACACAGTTTATGCCACAGCAGTTGACCCAAAGAAGGGCTCATTAGGCACAATTGCCCCCATTCGCAATTGGCT  
TCATTGTTGGGGCCAACATTTTGGCCGCGGCCCATTCCTCCGGTGGCTCAATGAACCCGGCTAGGTCCCTTCGGTC  
CGGCTGTGGCCAGCGGTGACTTTGCCGACAACCTGGATTTACTGGGTCGGTCCACTCATCGGTGGTGGTCTGGCTG  
GACTCGTCTATGCCTATGTGTTTCATGGTCCACGAACACGTTTCTCTTGTTAGCGAGTTC**TAA**

**>OleurTIP2;3a**

**ATG**CCAACCATTGCCTTCGGACGAATCGATGATTCATTAAGCGTTGGCTCTTTGAAGGCCTATTTAGCCGAATTC  
ATCTCGACTTTTGCTCTTCGTCTTCGCTGGAGTCGGCTCAGCCATTGCTTACAACAAGTTGACATATGATGCGGCT  
CTCGACCCAGCGGGCTGGTAGCGGTGGCGGTCTGCCACGGATTGCTCTGTTTGTGGCGGTTTCGATCGGAGCC  
AACATCTCCGGTGGCCATGTAAACCCTGCAGTCACCTTTGGTTTGGCTGTTGGTGGCCAAATTACAATTCTCACT  
GGCCTCTTCTATTGGATTGCTCAACTTTTGGGCTCCATTGTAGCATGCTTCTTGCTCAAATTTGTACACAGGTGGC  
TTGGCCATTCCAACCTCACAGTATGGCAGCTGGTGTGGAGCCATTGAAGGAGTTGTGATGGAAATTGTTATCACT  
TTTGCTTTGGTGTACACAGTTTATGCCACAGCAGTTGACCCAAAGAAGGGCTCATTAGGCACAATTGCCCCCAT  
GCCATTGGCTTCATTGTTGGGGCCAACATTTTGGCCGCGGCCCATTCCTCCGGTGGCTCAATGAACCCGGCTAGG  
TCCTTCGGTCCGGCTGTGGCCAGCGGTGACTTTGCCGACAACCTGGATTTACTGGGTCGGTCCACTCATCGGTGGT  
GGTCTGGCTGGACTCGTCTATGCCTATGTGTTTCATGGTCCACGAACACGTTTCTCTTGTTAGCGAGTTC**TAA**

**>OleurTIP2;3a**

MPTIAFGRIDDSLSVGLKAYLAEFISTLLFVFAGVGSIAIYNKLTIDYDAALDPAGLVAVAVCHGFALFVAVSIGA  
NISGGHVNPAVTFGLAVGGQITILTGLFYWIAQLLGSIVACFLLKFVTGGLAIPTHSMAAGVGAIEGVVMEIVIT  
FALVYTVYATAVDPKKGSLGTIAPIAIGFIVGANILAAGPFGSGSMNPARSFGPVAVASGDFADNWIYWVGPLIGG  
GLAGLVYAYVFMVHEHVPLVSEF\*

## **OleurTIP2;3b Oleur061Scf5616g00030.1**

**>Oleur061Scf6190:16438..18599 (+ strand) class=gene length=2162**

**>OleurTIP2;3b**

**ATG**CCAACCATTGCCTTCGGACGAATCGATGATTCATTAAGCGTTGGCTCTTTGAAGGCCTATTTAGCCGAATTC  
ATCTCGACTTTTGCTCTTCGTCTTCGCTGGAGTCGGCTCAGCCATTGCTTACA**GTTAGTCATCACTTCTTTTTCC**  
TTTAATAAAGTAAGATTTGATGCAGCACAATTCACACGAATCCCTCTCCCTGTACAAATCATTTCAGAGGGAGGAA  
AATACGCAGAATTCTTCGTTAGATCGGATCTATTAGACTCATTCTTTGGTGTTTCTCACTCTTTCACACACGCTA  
GGTGTGAGAGATTGATGCATAAAATAAAATTAACCCTAGCCATGCAATGCAGCTTGTGATTATAAATGTTGGTTT  
CGTATACAGTTCTAATTTGTGGGTATGTTTGATATTCTATTT**CGACAG**ACAAGTTGACATATGATGCGGCTCTCG  
ACCCAGCGGGGCTGGTAGCGGTGGCGGTCTGCCACGGATTGCTCTGTTTGTGGCGGTTTCGATCGGAGCCAACA  
TCTCCGGTGGCCATGTAAACCCTGCAGTCACCTTTGGTTTGGCTGTTGGTGGCCAAATTACAATTCTCACTGGCC  
TCTTCTATTGGATTGCTCAACTTTTGGGCTCCATTGTAGCATGCTTCTTGCTCAAATTTGTACACAGGTGGCTTGG  
TAAGTTGTTGTTCTATAATTATGTTATTCTTGAATTCTTTTCTAACTTCCTTCAAATGTGAGAGAGGGGATAAGA  
TTATGTCTTGATACGTCCCATCACGTACATTCTTTTTTTTTTTTTTTTTTAATCAAAAGTCTGACGCGTACACA  
ATTTCCGTAAATAAATAAATAAGATTTTAAATCTCTGACTTTAAAGTTCTAATGCCATTTTGACTAAATCTAAAA  
GTTTCATATCTAATCTAAACATACATTCTCAAAAACATAAACTGATTAATTGTACTCTTTTCGACTTTCACACA  
AAGAATAGTAAATCTTCACCATGTGTAGTTTCATATTGCTTTTGAATAAAAATGCTAACACGTGCACAATTTTCAT  
AAATGAATGACGACAAAATTTGAACCTTGGTTCCCTCTATGTGTTCTCTACAATTTTGACTCGATCTAAAAAGTTTAC  
AACTGATCTAAGCTTACAGTACAAATGAGAATTGTATTCTTTTTCTAACTTTCAACACGTTATATTAAGAATAAT  
CGATCTTGAATGATTTCTATAACAAGTGTCTAATTATGTTTGTAAATTTGATGATTAATTTCTATGTAGGCCATT  
CCAACCTCACAGTATGGCAGCTGGTGTGGAGCCATTGAAGGAGTTGTGATGGAAATTGTTATCACTTTTGCTTTG



GTGTACACAGTTTATGCCACAGCAGTTGACCCAAAGAAGGGCTCATTAGGCACAATTGCCCCCATTTGCCATTGGC  
TTCATTGTTGGGGCCAACATTTTGGCCGCCGGCCCATTTCTCCGGTGGCTCAATGAACCCGGCTAGGTCCCTCCGT  
CCGGCTGTGGCCAGCGGTGACTTTTGGCGACAACCTGGATTTACTGGGTCCGTCCACTCATCGGTGGTGGTCTGGCT  
GGACTCGTCTATGCCTATGTGTTTCATGGTCCACGAACACGTTCCCTCTTGTTAGCGAGTTCTAA

>OleurTIP2;3b

ATGCCAACCATTGCCTTCGGACGAATCGATGATTCAATTAAGCGTTGGCTCTTTGAAGGCCTATTTAGCCGAATTC  
ATCTCGACTTTTGCTCTTCGCTCTTCGCTGGAGTCGGCTCAGCCATTGCTTACAACAAGTTGACATATGATGCGGCT  
CTCGACCCAGCGGGCTGGTAGCGGTGGCGGTCTGCCACGGATTTGCTCTGTTTGTGGCGGTTTCGATCGGAGCC  
AACATCTCCGGTGGCCATGTAAACCCAGCAGTCACCTTTGGTTTGGCTGTTGGTGGCCAAATTACAATTCTCACT  
GGCCTCTTCTATTGGATTGCTCAACTTTTGGGCTCCATTGTAGCATGCTTCTTGCTCAAATTTGTACAGGTGGC  
TTGGCCATTCCAACCTCACAGTATGGCAGCTGGTGTGGAGCCATTGAAGGAGTTGTGATGGAAATTGTTATCACT  
TTTGCTTTGGTGTACACAGTTTATGCCACAGCAGTTGACCCAAAGAAGGGCTCATTAGGCACAATTGCCCCATT  
GCCATTGGCTTCATTGTTGGGGCCAACATTTTGGCCGCCGGCCCATTTCTCCGGTGGCTCAATGAACCCGGCTAGG  
TCCTTCGGTCCGGCTGTGGCCAGCGGTGACTTTGCCGACAACCTGGATTTACTGGGTCCGTCCACTCATCGGTGGT  
GGTCTGGCTGGACTCGTCTATGCCTATGTGTTTCATGGTCCACGAACACGTTCCCTCTTGTTAGCGAGTTCTAA

>OleurTIP2;3b

MPTIAFGRIDDSLSVGLKAYLAEFISTLLFVFAGVGSIAIYNKLTIDAALDPAGLVAVAVCHGFALFVAVSIGA  
NISGGHVNPAVTFGLAVGGQITILTGLFYWIAQLLSIVACFLFKFVTGGLAIPTHSMAAGVGAIEGVVMEIVIT  
FALVYTVYATAVDPKKGSLGTIPIAIGFIVGANILAAGPFSGSGSMNPARSFGPVAVASGDFADNWIYWVGPLIG  
GLAGLVYAYVFMVHEHVPLVSEF\*

## OleurTIP2;4 Oleur061Scf2185g00004.1

>Oleur061Scf2185:106959..109328 (- strand) class=gene length=2370

>OleurTIP2;4

ATGGTGAAGATGGCATTGGGTAGCATTGGTGACTCTTTTTTCAGTTCCGTCGCTAAAGGCTTATCTTGCTGAGTTC  
ATTGCCACCCTCCTCTTTGTCTTTGCTGGTGTAGGTTCCGCTATAGCTTACAATAAGTACATATTTCTGTTTTTC  
ATGAAGTGTGTATATTTTACGGTCGGCCCCCAAGCCAGATATAGAATGAGGGTCAGGTTAGGTTAAGAGCGAGT  
GTAAACCTTTATCAAAGCTTATGATATTAGTCGATTTCAAATTTATTGGAATTTGTGCAGACAAGCTCACGTCCG  
ATGCAGCTCTCGACCCACCTGGATTGATGGCAGTAGCGGTGGCTCACGCATTTGCATTGTTTGTGGGCGTTTCCA  
TGGCGGCCAATGTATCCGGCGGTCACTGCAATCCGGCCGTCACATTTGGACTGGCCATTGGAGGCAACATCACAA  
TCATAACTGGCATTCTTCTATTGGATTGCCAGTTGCTTGGTTCCACTGTTGCATGCCCTCTCCTCAAATTCGTCA  
CTAATGGCTTGTAAGTCAATCCCAATACCAAAATTTAATCTTATTTTGCAGTAAAGCAATAAAATTAACCATG  
CAGGAGCTTTCTTAATGGCCTCCGGAGGTCATCTCGTGACCATGGGGGCTTCTGTGATTAAAAAGAAAAAGAA  
AAAGAAAAAGAAAGTTACTCATCCTTTGGATTAATTGAATATGCGAGCTTATTCCATCGTTTGTGTTATACGAA  
GTATCGAACCAACATATCTCGAAGTTAGAAGATTTACAGAAAACTTAAAGAAATACACAACCTTCCTTTCAAGC  
TTTCTCAAACCTGCTACCATGGCATCAAGAATGAAGATGTTTCAATGGGGCTCAGGACAAAAACGAATTGTACCC  
GTTTGAGTGACTAAAACCTAATCCAGATTCTCAAGCGCGCTTTATTGATTAAAGGAAGCCACAAGGCAGATGA  
ATTCACACTACTTCTTATCAGTACACGAAGTATCAAGATTACACGAAGAATCAGAAAGAAATCAACTTCCAATA  
AAAAATTGGAAGATGAATACAAAAGAGATAGGAAGTGTCACAAAGCATATACACAAGGCGCAAAACCTAGGAATG  
AAATAATAGGGCAACAAAAGTAGTATTTATGCACTGGCTTCCAACCATTGATCAAATTTCAATCTAACAGTCCAG  
TTGGCTCCTCAAACAAAGAAGAAATCCCGTGAGTCTGCAACAATAAAAGTACCATGCCTTAAACAAGACATTAG  
TGCAATTGGACTCGGGTAATTGGGTGACGCCACGTTATTGGGCAATTGCAAATTTTAATAGAAAATGGTTTGGG  
CCTTAGCCTTATCATCTATTGCCCTAAGCAGTAATTAGGCATCATCCCAACAGTTTGTGTTGTAGGAATTTGC  
TTTTTGTAAAAGAGCTTTTTTGATAAAACTACTATATTATGCTGAATTTCTCTTAAATTTTCTAGCCAGATATA  
TCTCCAGAAAATTATTCAAATATGTTCAAAAACAGCTTGAAACAGTTTTTGTATACCAAATGCTCTTAAACCTTGA  
ATTATAGGGTGAATCAAGACGGGCTTTTTTCGAGTTTTTCTTAATGTGCTAGGCCAAATATATACTAATATTTGTT  
GTTTGGCAGGCCATTCCCCTCATGCAGTTGCTTCTGGAATGAATGCTGTGGAGGGTGTAGTAATGGAGATTGTC  
ATCACTTTTGTCTCTAGTCTACACAGTCTACGCCACTGCAGCAGACCCCCAAAAGGGCTCATTGGGCATAATTGCA  
CCCATTGCAATTGGGTTTATTGTTGGTGCAAACATTTTAGCTGCTGGCCCATTTAGTGGTGGATCGATGAACCCA  
GCCCCGATCATTTGGGCCGGCCGTTGCTGCTGGAGACTTCTCTCAGAACTGGATCTATTGGGTTGGCCCCACTTATT  
GGGGGAGGATTGGCAGGCCTGGTATATGGTTATGTTTTTATTGCATCATATGCCCCATTCCCAGCCCAAGAGGGA  
TATGCTTAA

>OleurTIP2;4

ATGGTGAAGATGGCATTGGGTAGCATTGGTGACTCTTTTTTCAGTTCCGTCGCTAAAGGCTTATCTTGCTGAGTTC  
ATTGCCACCCTCCTCTTTGTCTTTGCTGGTGTAGGTTCCGCTATAGCTTACAACAAGCTCACGTCCGATGCAGCT  
CTCGACCCACCTGGATTGATGGCAGTAGCGGTGGCTCACGCATTTGCATTGTTTGTGGGCGTTTCCATGGCGGCC  
AATGTATCCGGCGGTCACTGCAATCCGGCCGTCACATTTGGACTGGCCATTGGAGGCAACATCACAAATCATAACT  
GGCATTTTCTATTGGATTGCCAGTTGCTTGGTTCCACTGTTGCATGCCTTCTCCTCAAATTCGTCACTAATGGC  
TTGGCCATTCCCCTCATGCAGTTGCTTCTGGAATGAATGCTGTGGAGGGTGTAGTAATGGAGATTGTCACTACT  
TTTGCTCTAGTCTACACAGTCTACGCCACTGCAGCAGACCCCCAAAAGGGCTCATTGGGCATAATTGCACCCATT

GCAATTGGGTTTCATTGTTGGTGCAAACATTTTAGCTGCTGGCCCATTTAGTGGTGGATCGATGAACCCAGCCCGA  
TCATTTGGGCCCGCCGTTGCTGCTGGAGACTTCTCTCAGAACTGGATCTATTGGGTTGGCCCACTTATTGGGGGA  
GGATTGGCAGGCCTGGTATATGGTTATGTTTTTATTGCATCATATGCCCCATTCCCAGCCCAAGAGGGATATGCT  
**TAA**

>*OleurTIP2*;4

MVKMALGSIGDSFSVPSLKAYLAEFIATLLFVFAGVGSIAIYNKLTSDAALDPPGLMAVAVAHAFALFVGVSMAA  
NVSGGHLNPAVTFGLAIGGNITIIITGIFYWIAQLLGSTVACLLLKFTVNGLAIPHAVASGMNAVEGVVMEIVIT  
FALVYTVYATAADPKKGSGLIIAPIAIGFIVGANILAAGPFSGGSMNPARSFGPAAVAGDFSQNWIIYVWGPLIGG  
GLAGLVYGYVFIASYPFPAQEGYA\*

### *OleurTIP2*;5a *Oleur061Scf1607g00003.1*

>*Oleur061Scf1607*:86016..87968 (+ strand) class=gene length=1953

>*OleurTIP2*;5a

**ATG**GTGAAGATTAATTGGGGTAGCATTGGCGACTCTTTTTTCGGTTACGTCGCTAAAGGCTTACATTGCTGAGTTT  
ATTGCCACCCTTCTCTTTGTTTTTGTCTGGTGTGGTTCTGCTATAGCTTATA**GTAA**GT**CA**CTTTTTATGTTTTGC  
TACAGTATATACACACGTAATTCCGTCTATATTTAGTCTCTATCTGGTGGGGATTTTTAGTAGATTTTGATAAAAT  
GTTGATAAAATATGTAGTTGAAAAGTGATGAGTGTTATAAAATGTGTTGTTAAATTAATGTTGATTTAGTTT  
AGATTTAAATTTGAATTTTGAATTTTCATCGTACAGGCGCTCAGATAGTTGACCATAAGCCCGGATAAAGGAGGAT  
CGTTGCAATAGATTAACCATAAGAATAAAAAGGTTTAGGCTTAGGTGTACTAATATATGGAGTATGATTGATGTT  
TGCAGACAAGCTCACGTCTGATGCAGCTCTCGACCCACCCGGTTTGGTGGCAGTCGCGGTGGCTCACGCATTTGC  
ATTGTTCTGATAGGCGTTTCCATGGCGGCCAATGTGTCCGGTGGTCATTTGAATCCGGCTGTACATTCGGATTGGC  
CATCGGAGGCAACATCACCATCATAACTGGCCTTTTCTATTGGATTGCACAATTGCTTGGTTCTATTGTTGCATG  
CCTTCTCCTCAAATTTGTACCCGGTGGCTTG**GTAA**GT**TATA**CCAAGATTAAATTAACCTATTTTGAGGGTAA**A**  
GCACTAAATTTGCTCATTTTGAGATCTTTAGAGCCTTTTCGCGATAAGAAAAATACTCATCTTTTGGATTAACTGC  
ATGTTGAAGCTTATTTTTTAATTATTTTCTGATTGATATAAGATAGAAAACAGCTTGTCTACTCTGATGTTGGACC  
AAAACAAGTCATAATTTATGTAAATCGACTTCTAAATTGAAACGTCAACTCAATTCATTATAGGTTTCGTTAAGC  
TTTAATAACTGAGGTCACAAGAAATTACTCAAATTTGTTGAGTAGTTTCGTGTTTCGACTAGACAAAAACCTTACAA  
AACATCACCTGATACATTAAAGACTGGAGTTCAAGTATTTCAATTGAATTAGCATTAAATTTCTACTCGAATTTGA  
GTAGTTTTAGCCCTTGTTTGACCCCCCATTAATTAATTAATTCATTTTTTCTCTTTTATCAAACATATATTTTCT  
AATAAAACAATATACACGTAACCTTAAACCTTTTCAATTTCTATTTAACCACACATTCTTCAAAAAATTACAAT  
TCTTTTTCATTATAATTCGAAATAATGGATCCCAACAAGGGCCATAGACTATCGCCAGATTGAATCAAGATGGGCT  
TTTACCTGAATGTGGTAAGCCCAAACCATACTAATATTTGATGTTTGGCAGGCCATTCCCCTCATGCAGTTGCT  
TCTGGTATGAATGCTGTGGAGGGTGTGTGAATGGAGATTGTCATCACTTTTGCTTTGGTCTACACAGTCTATGCC  
ACTGCTGCGGACCCCAAAAAGGCTCGTTGGGCACAATTGCACCCATTGCAATTGGGTTCAATTGTTGGTGCAAAAC  
ATTTTAGCTGCTGGCCCATTTAGTGGTGGATCGATGAACCCGGCCCGATCATTGGGCCAGCCGTTGCTGCAGTC  
GACTTCTCTCAGAACTGGATCTATTGGGTGCGCCCACTTATTGGTGGAGGTTTGGCTGGCCTGGTATATGGGGAT  
GTTTTTATTGGATCATATGCCCCACTTCCAGTCCAAGAAGAATATCCT**TAA**

>*OleurTIP2*;5a

**ATG**GTGAAGATTAATTGGGGTAGCATTGGCGACTCTTTTTTCGGTTACGTCGCTAAAGGCTTACATTGCTGAGTTT  
ATTGCCACCCTTCTCTTTGTTTTTGTCTGGTGTGGTTCTGCTATAGCTTATAACAAGCTCACGTCTGATGCAGCT  
CTCGACCCACCCGGTTTGGTGGCAGTCGCGGTGGCTCACGCATTTGCATTGTTTCGTAGGCGTTTCCATGGCGGCC  
AATGTGTCCGGTGGTCATTTGAATCCGGCTGTACATTCGGATTGGCCATCGGAGGCAACATCACCATCATAACT  
GGCCTTTTCTATTGGATTGCACAATTGCTTGGTTCTATTGTTGCATGCCTTCTCCTCAAATTTGTACCCGGTGGC  
TTGGCCATTCCCCTCATGCAGTTGCTTCTGGTATGAATGCTGTGGAGGGTGTGTGAATGGAGATTGTCATCACT  
TTTGCTTTGGTCTACACAGTCTATGCCACTGCTGCGGACCCCAAAAAGGCTCGTTGGGCACAATTGCACCCATT  
GCAATTGGGTTCAATTGTTGGTGCAAACATTTTAGCTGCTGGCCCATTTAGTGGTGGATCGATGAACCCGGCCCGA  
TCATTTGGGCCAGCCGTTGCTGCAGTCGACTTCTCTCAGAACTGGATCTATTGGGTGCGCCCACTTATTGGTGG  
GGTTTGGCTGGCCTGGTATATGGGGATGTTTTTATTGGATCATATGCCCCACTTCCAGTCCAAGAAGAATATCCT  
**TAA**

>*OleurTIP2*;5a

MVKINWGSIGDSFSVTSLSKAYIAEFIATLLFVFAGVGSIAIYNKLTSDAALDPPGLVAVAVAHAFALFVGVSMAA  
NVSGGHLNPAVTFGLAIGGNITIIITGLFYWIAQLLGSIVACLLLKFTVNGLAIPHAVASGMNAVEGVVMEIVIT  
FALVYTVYATAADPKKGSGLTIAPIAIGFIVGANILAAGPFSGGSMNPARSFGPAAVAVDFSQNWIIYVWGPLIGG  
GLAGLVYGDVFIGSYAPLPVQEEYP\*

### *OleurTIP2*;5b *Oleur061Scf8992g00006.1*

>*Oleur061Scf8992*:66181..68174 (+ strand) class=gene length=1994

**>OleurTIP2;5b**

ATGGTGAAGATTAATTGGGGTAGCATTGGCGACTCTTTTTTCGGTTACGTCGCTAAAGGCTTACATTGCTGAGTTT  
ATTGCCACCCTTCTCTTTGTTTTTGGCTGGTGGTTGCTCTGCTATAGCTTATAGTAAGTCATCTTTTATGTTTTGC  
TACAGTATATACACACGTAATTCTGTCTATATTTAGTCTCTATCTGGTGGGAATTTTATAGTAGATTTTGATAAAAT  
GTTGATGAAATATGTGGTTGAAAAGTGATAAGTGTTATAAAATATGTGGTTAAAATTAATGTTGATCTTAATTT  
AGATTAAAATTTGAATTTGAATTTTCATCATACAGGCGCTCAGATAGTTGACCCTAAGCCCGGATAAAGGAGGAT  
GGTTGCAGTAGATTAACCATAAGAATAAAAAGGTTTAGGCTTAGGTGTACTAATATATGGAGTATGATTGATGTT  
TGCAGACAAGCTCACGTCTGATGCAGCTCTCGACCCACCTGGTTTGGTGGCAGTCGCGGTGGCTCACGCATTGTC  
ATTGTTTCGTGGGCGTTTCCATGGCGGCCAATGTGTCCGGTGGTCATTTGAATCCGGCTGTGCACATTCGGATTGGC  
CATCGGAGGCAACATCACCATCATAACTGGCCTTTTCTATTGGATTGCACAATTGCTTGGTCTATTGTTGCATG  
CCTTCTCCTCAAATTCGTACCCGGTGGCTTGTAAGTTATACCAAGATTAAATTAAACTTATTTTGAGGGTAAAG  
CACTAAAATAGCTCATTTTGAGATCTTTAGAGCCTTTTCGCAATAAGAAAAATACTCATCTTTTGATTAACTGCA  
TGTTGAAGCTTATTTTTAATTATTTTCTGATTGATATAAGATAGAAAACAGCTTGTCTACTCTGATGTTGGACCA  
AAACAAGTCATAATTTATGTAAATCGACTTCTAAATTGAAACGTCAACTCAATTCATTATAGGTTCTGTTAAGCT  
TTAATAACTGAGGTAACAAAAAATTACTCAAATTGTTTCGAGTAGTTCTGTTCGACTAGACAAAAACCTTACAAA  
ACATCACCTGATACATTAAAGACTGGAGTTCAAGTATTTTATTGAATTAGCATTTAAATTTCTACTCGAATTTGAG  
TAGTTTTACCCTTTGTTTGAAACCCCATTAATTAATAATTCATTCTCTCTCTCTTTTATCAAGCATACATTTTT  
CAATAAAACAATATTACACGTAAACTTAAATACTTTTCTTTCTATTTAACCACACATTCTTCAAAAAATTACTA  
TTCTTTTCTATTATAATTCGAAATAATGGATCCCAACAAGGCGCTAGACTATCGCTAGATCGTATCAAGATGGGC  
TTTTACCTGAATGTGGTAAGCCCAAACCATACTAATATTTGATGTTTGGCAGGCCATTCCCACTCATGCAGTTGC  
TTCTGGTATGAATGCTGTGGAGGGTGTGTGAATGGAGATTGTCTCACTTTTGGCTTTGGTCTACACAGTCTATGC  
CACTGCTGCGGACCCCAAAAAAGGCTCGTTGGGCACAATTGCACCCATTGCAATTGGGTTTCAATTGTGGGTGCAAA  
CATTTTAGCTGCTGGCCCATTTAGTGGTGGATCGATGAACCCGGCCCGATCATTTGGGCCAGCCGTTGCCGCAGT  
CGACTTCTCTCAGAACTGGATCTATTGGGTGCGCCCACTTATTGGTGGAGGATTGGCTGGCCTGGTATATGGTGTA  
TGTTTTTATTGGATCATATGCCCCACTTCCAGTCCAAGAAGAATATCCT**TAA**

**>OleurTIP2;5b**

**ATG**GTTGAAGATTAATTGGGGTAGCATTGGCGACTCTTTTTTCGGTTACGTCGCTAAAGGCTTACATTGCTGAGTTT  
ATTGCCACCCTTCTCTTTGTTTTTGGCTGGTGGTTGACAAGCTCACGTCTGATGCAGCTCTCGACCCACCTGGTTTG  
GTGGCAGTCGCGGTGGCTCACGCATTTGCATTGTTTCGTGGGCGTTTCCATGGCGGCCAATGTGTCCGGTGGTCAT  
TTGAATCCGGCTGTGCATTCGGATTGGCCATCGGAGGCAACATCACCATCATAACTGGCCTTTTCTATTGGATT  
GCACAATTGCTTGGTTCTATTGTTGCATGCCTTCTCCTCAAATTCGTACCCGGTGGCTTGGCCATTCCCACTCAT  
GCAGTTGCTTCTGGTATGAATGCTGTGGAGGGTGTGTGAATGGAGATTGTCATCACTTTTGGCTTTGGTCTACACA  
GTCTATGCCACTGCTGCGGACCCCAAAAAAGGCTCGTTGGGCACAATTGCACCCATTGCAATTGGGTTTCAATTGTG  
GGTGCAACATTTTAGCTGCTGGCCCATTTAGTGGTGGATCGATGAACCCGGCCCGATCATTTGGGCCAGCCGTT  
GCCGCAGTCGACTTCTCTCAGAACTGGATCTATTGGGTGCGCCCACTTATTGGTGGAGGATTGGCTGGCCTGGTA  
TATGGTGATGTTTTTATTGGATCATATGCCCCACTTCCAGTCCAAGAAGAATATCCT**TAA**

**>OleurTIP2;5b**

MVKINWGSIGDSFSVTSCLKAYIAEFIAITLLFVFAGVDKLTSDAALDPPGLVAVAVAHAFALFVGVSMANVS  
LNPVATFGLAIGNITIITGLFYWIAQLLGSIVACLLLLKFVTGGLAIPTHAVASGMNAVEGVVMEIVITFALVYT  
VYATAADPKKGLGTIPIAIGFIVGANILAAGPFGSGSMNPARSFGPAAVDFSQNWIIYVWGPLIGGGLAGLV  
YGDVFIGSYAPLPVQEEYP\*

**OleurTIP3;1a Oleur061Scf6254g04008.1**

>Oleur061Scf6254:448318..449463 (+ strand) class=gene length=1146

**>OleurTIP3;1a**

**ATG**CCTCGTGGGTATACTTTTGGTAGGGCTGAAGAAGCCACCCACCCCGACTCTGCCAGGGCCACCTTGGCTGAG  
TTTCTCTCCATGCTCGTCTTTGTCTTCGCCGGCGAAGGCTCCGTCTTGCTCTTG**GTATCTTAATTCTTCAGTAA**  
**CGTTCTTGAAAATAAGAAGAAGTAGGTGCACATGGACGTACAGCTCATATTATTCTCAATTTGTATCGATTGCA**  
**GATAAGATGTATAAGGATACAGCCTTAGGAGCATCAAGCCTGGTGGTCATCGCTCTCGCCACGCCCTGTCACTG**  
**TTTGCAGCTGTGGCTTCGAGTATGAATGTTTCCGGCGGGCACGTCAATCCTGCCGTCACTTTCCGGCGCACTTGTA**  
**GGGGGAAGAGTCTCTGTGCTGCGTGCTATTTACTACTGGATTGCTCAACTTTTGGGTGCAGTTTTAGCTGCTATC**  
**TTGTTGAGGCTGGCAACTGATGGCTTGTAAGAAAGAAATAGAAAAACCCACCCGCTTCCACCTTAATTAATTAC**  
**TTGCATGTCTCAGCACATGTTTTGGTGTGTTTATAAGTGCTTATAAGTACCGGGACTTTCTACTCGTTTTTAATA**  
**AGCATCTGTGTTTGCAGAGGCCGCGAGGGTTTTCCGTGGCGGATGGAGTAGGAGAATGGAACGCTTTGGTGATG**  
**GAGATTGTGCTGACATTTGGACTGGTATATACAGTGACGCTGCAATCGATCCAAAAAGAGGAAGCTTGGGC**  
**ACCATTGCTCCTCTTGCCATTGCCTTCATAGTTGGGGCTAATGTGCTGGTTGGAGGGCTTTCTCCGGAGCATCG**  
**ATGAACCCTGCTCGTGCTTCGGGCCAGCACTTGTGGGATGGAGGTGGAAGACCACTGGGTCTACTGGTTGGGA**  
**CCATTGCTTGGTGGGCTCTGGCTGGAGTTATATACGAGTTCCGGGTGATACAAACCGAGACCCCGCACCCACG**  
**CATCACCTTACCAGCCTTTGGCCCCAGAAGATTAC**TAG****

**>OleurTIP3;1a**

**ATG**CCTCGTGGGTATACTTTTGGTAGGGCTGAAGAAGCCACCCACCCCGACTCTGCCAGGGCCACCTTGGCTGAG  
TTTCTCTCCATGCTCGTCTTTGTCTTCGCCGGCGAAGGCTCCGTCTTGCTCTTGATAAGATGTATAAGGATACA  
GCCTTAGGAGCATCAAGCCTGGTGGTCATCGCTCTCGCCACGCCCTGTCACTGTTTGCAGCTGTGGCTTCGAGT  
ATGAATGTTTCCGGCGGGCACGTCAATCCTGCCGTCACTTTCCGGCGCACTTGTAGGGGGAAGAGTCTCTGTGCTG  
CGTGCTATTTACTACTGGATTGCTCAACTTTTGGGTGCAGTTTGTAGCTGCTATCTTGTGAGGCTGGCAACTGAT  
GGCTTGAGGCCGCGAGGGTTTTCCGTGGCGGATGGAGTAGGAGAATGGAACGCTTGGTGATGGAGATTGTGCTG  
ACATTTGGACTGGTATATACAGTGTACGCGACTGCAATCGATCCAAAAGAGGAAGCTTGGGCACCATTTGCTCCT  
CTTGCCATTGCCTTCATAGTTGGGGCTAATGTGCTGGTTGGAGGGCCTTTCTCCGGAGCATCGATGAACCCCTGCT  
CGTGCGTTCCGGCCAGCACTTGTGGGATGGAGGTGGAAGACCACTGGGTCTACTGGTTGGGACCATTCTGTTGGT  
GCGGCTCTGGCTGGAGTTATATACGAGTTCCGGGTGATACAAACCGAGACCCCGCACCCACGCATCACCTTCAC  
CAGCCTTTGGCCCCAGAAGATTAC**TAG**

**>OleurTIP3;1a**

MPRGYTFGRAEEATHPDSARATLAEFLSMLVVFVAGEGSVLALDKMYKDTALGASSLVVIALAHALSIFAAVASS  
MNVSGGHVNPVAVTFGALVGGRVSVLRAIYYWIAQLLGAVLAAILLRLATDGLRPRGFSVADGVGEWNALVMEIVL  
TFGLVYTVYATAIDPKRGS LGTIAPLAIAFIVGANVLVGGPFSGASMNPARAFGPALVGWRWKDHWVYWLGPFGV  
AALAGVIYEFQVITETPHPTHHLHQPLAPEDY\*

### **OleurTIP3;1b Oleur061Scf5220g00047.1**

**>Oleur061Scf5220:6075..7220 (- strand) class=gene length=1146**

**>OleurTIP3;1b**

**ATG**CCTCGTGGGTATACTTTTGGTAGGGCTGAAGAAGCCAACCCACCCCGACTCTGCCAGGGCCACCTTGGCTGAG  
TTTCTCTCCATGCTCGTCTTTGTCTTCGCCGGCGAAGGCTCCGTCTTGCTCTTG**GTATCTTAATTCTTCAGTAA**  
**CGTTCTTGAAAATAAGAAGAAGTAGGTGCACATGGACCTACAGCTCATATTATTCTCAATTTGTATCGATTGCA**  
**GATAAGATGTATAAGGATACAGCCTTAGGAGCATCAAGCCTGGTGGTCATCGCTCTCGCCACGCCCTGTCACTG**  
TTTGCAGCTGTGGCTTCGAGTATGAATGTTTCCGGCGGGCACGTCAATCCTGCCGTCACTTTCCGGCGCACTTGTG  
GGTGGGAGAGTCTCCGTGCTGCGTGCTATTTACTACTGGATTGCTCAACTTTTGGGTGCAGTTTTAGCTGCTATC  
TTGTTGAGGCTGGCAACTGATGGCTTG**GTAAAAAGAAATAGAAAAACCCACCCCTTCCACCTTAATTAATTAC**  
**TTGCATGTCTTAGCACAAAGTTTTGGTGTGTTTATAAGTGCTTATAAGTACCGGGACTTTCTACTCCTTTTTAATA**  
**AGCAGCTTGTGTTTGCAGAGGCCGCGAGGGTTTTCCGTGGCCGATGGAGTAGGAGAATGGAACGCTTGGTGATG**  
GAGATAGTGCTGACATTTGGACTGGTATATACAGTGTACGCGACTGCAATCGATCCAAAGAGAGGAAGCTTGGGC  
ACCATTGCTCCTCTTGCCATTGCCCTTCATAGTTGGGGCTAATGTACTGTTGGAGGGCCTTTCTCCGGAGCATCG  
ATGAACCTGCTCGTGCAATTCGGGCCAGCACTGGTAGGATGGAGGTGGAGAGACCCTGGGTCTACTGGGTGGGA  
CCATTGCTTGGTGCGGCTCTAGCTGGAGTTATATATGAGTTCCGAGTGATACAAACCGAGACCCCGCACCCACG  
CATCACCTTACCAGCCTTTGGCCCCAGAAGATTAC**TAG**

**>OleurTIP3;1b**

**ATG**CCTCGTGGGTATACTTTTGGTAGGGCTGAAGAAGCCAACCCACCCCGACTCTGCCAGGGCCACCTTGGCTGAG  
TTTCTCTCCATGCTCGTCTTTGTCTTCGCCGGCGAAGGCTCCGTCTTGCTCTTGATAAGATGTATAAGGATACA  
GCCTTAGGAGCATCAAGCCTGGTGGTCATCGCTCTCGCCACGCCCTGTCACTGTTTGCAGCTGTGGCTTCGAGT  
ATGAATGTTTCCGGCGGGCACGTCAATCCTGCCGTCACTTTCCGGCGCACTTGTGGGTGGGAGAGTCTCCGTGCTG  
CGTGCTATTTACTACTGGATTGCTCAACTTTTGGGTGCAGTTTGTAGCTGCTATCTTGTGAGGCTGGCAACTGAT  
GGCTTGAGGCCGCGAGGGTTTTCCGTGGCCGATGGAGTAGGAGAATGGAACGCTTGGTGATGGAGATAGTGCTG  
ACATTTGGACTGGTATATACAGTGTACGCGACTGCAATCGATCCAAAGAGAGGAAGCTTGGGCACCATTTGCTCCT  
CTTGCCATTGCCTTCATAGTTGGGGCTAATGTACTGTTGGAGGGCCTTTCTCCGGAGCATCGATGAACCCCTGCT  
CGTGCAATTCGGGCCAGCACTGGTAGGATGGAGGTGGAGAGACCCTGGGTCTACTGGGTGGGACCATTCTGTTGGT  
GCGGCTCTAGCTGGAGTTATATATGAGTTCCGAGTGATACAAACCGAGACCCCGCACCCACGCATCACCTTCAC  
CAGCCTTTGGCCCCAGAAGATTAC**TAG**

**>OleurTIP3;1b**

MPRGYTFGRAEEANHPDSARATLAEFLSMLVVFVAGEGSVLALDKMYKDTALGASSLVVIALAHALSIFAAVASS  
MNVSGGHVNPVAVTFGALVGGRVSVLRAIYYWIAQLLGAVLAAILLRLATDGLRPRGFSVADGVGEWNALVMEIVL  
TFGLVYTVYATAIDPKRGS LGTIAPLAIAFIVGANVLVGGPFSGASMNPARAFGPALVGWRWRDHWVYVWGPFGV  
AALAGVIYEFQVITETPHPTHHLHQPLAPEDY\*

### **OleurTIP3;1c Oleur061Scf3963g07030.1**

**>Oleur061Scf3963:728110..729328 (+ strand) class=gene length=1219**

**>OleurTIP3;1c**

**ATG**CCTCGTGGGTACACTTTTGGTAGGGCAGAAGAAGCCACTCACCCCGACTCTGCCAGGGCGACCTTGGCTGAG  
TTCCTGTGACCCCTCGTCTTCGTATTTGCCGAGAGGGCTCCATCCTTGCCCTTG**GTACGTAATTTTGTACTTCA**

GAAACGTCCTAACTAATATGCATAATTTTATGTTCTCAACTTGTATTAATGTTGCAGATAAGATGTATAGGGAGA  
CAGCTTTAGGAGCATCGAGCCTGCTGGTTATCGCCCTCGCCCACGCCCTCGCTCTGTTTCGCAGCTGTGGCTTCAA  
GTATGAACGTCTCTGGCGGGCACGTTAATCCTGCTGTCACTTTTGGCGCACTTGTGGTGGGAGAGTCTCCGTGC  
TACGTGCCATTTTCTATTGGATTGCTCAGATTTTGGGTGCTGTTGCAGCTTCTCTCTTGTGTGGCTAGCGACTA  
ATGTTTGTGTAACAAATTAAGAAAAAGAAACCCACTTGTGTTTATAATTAACCGGATTGATTCAATTTTTTG  
ACGTTTGTGGCTTCTATATATGTTATATACGTTTAAGAAAGTAACCTTTAAGCATGTGGTGATTGTGGTTCGAGA  
AGCCGCAAGGATATTCCGTGGCGCTTGGAGTAGGAGAGTGGAACGCTTTGGTGATGGAGATAGTGTGACTTTTG  
GACTGGTATATACGGTGTACGCGACTGCGATTGATCCAAAGAGGGGAAGTTTGGGAACCTATTGCACCTCTTGCGA  
TAGCCTTCATATTTGGGGCTAATGTGCTGGTTGGAGGGCCTTTCTCAGGAGCATCGATGAACCTGCTCGGGCTT  
TTGGGCCTGCACTGGTAGGGGGAGGTGGAGGGACCACTGGATCTACTGGTTGGGACCGTTGCTTGGTGCGGCC  
TGGCCGAGTTATATACGAGTTTGAATGATACAAGCGGAGACCCCTCACCACACACATCACCAGCCTTTGGCTC  
CAGAAGATTAC**TAG**

>OleurTIP3;1c

**ATG**CCTCGTGGGTACACTTTTGGTAGGGCAGAAGAAGCCACTCACCCCGACTCTGCCAGGGCGACCTTGGCTGAG  
TTCCTGTGACCCCTCGTCTTCGTATTTGCCGGAGAGGGCTCCATCCTTGCCCTTGATAAGATGTATAGGGAGACA  
GCTTTAGGAGCATCGAGCCTGCTGGTTATCGCCCTCGCCCACGCCCTCGCTCTGTTTCGCAGCTGTGGCTTCAAGT  
ATGAACGTCTCTGGCGGGCACGTTAATCCTGCTGTCACTTTTGGCGCACTTGTGGTGGGAGAGTCTCCGTGCTA  
CGTGCCATTTTCTATTGGATTGCTCAGATTTTGGGTGCTGTTGCAGCTTCTCTCTTGTGTGGCTAGCGACTAAT  
GGTTTGAAGCCGCAAGGATATTCCGTGGCGCTTGGAGTAGGAGAGTGGAACGCTTTGGTGATGGAGATAGTGTG  
ACTTTTGGACTGGTATATACGGTGTACGCGACTGCGATTGATCCAAAGAGGGGAAGTTTGGGAACCTATTGCACCT  
CTTGCGATAGCCTTCATATTTGGGGCTAATGTGCTGGTTGGAGGGCCTTTCTCAGGAGCATCGATGAACCTGCT  
CGGGCTTTTGGGCCTGCACTGGTAGGGGGAGGTGGAGGGACCACTGGATCTACTGGTTGGGACCGTTGCTTGGT  
GCGGCCCTGGCCGAGTTATATACGAGTTTGAATGATACAAGCGGAGACCCCTCACCACACACATCACCAGCCT  
TTGGCTCCAGAAGATTAC**TAG**

>OleurTIP3;1c

MPRGYTFGRAEEATHPDSARATLAEFLSTLVFVFAGEGSILALDKMYRETALGASSLLVIALAHALALFAAVASS  
MNVSGGHVNPVAVTFGALVGGRVSVLRAIFYWIAQILGAVAASLLWLATNGLKPQGYSSVALGVGEWNALVMEIVL  
TFGLVYTVYATAIDPKRSLGTIAPLAIAFIFGANVLVGGPFSGASMPNPARAFGPALVGGRRWDHWIYWLGPLLG  
AALAGVIYEFGMIAETPHHTHHQPLAPEDY\*

## OleurTIP4;1 Oleur061Scf6420g00014.1

>Oleur061Scf6420:44973..52364 (- strand) class=gene length=7392

>OleurTIP4;1

**ATG**GCTAAGATTGCCTTGGGAAATGCCCCGAGAGGCCTTTCAATCGGACTGCATCCAGGCCCTTATTGTGGAATTC  
ATTTGCACGTTTCTTTTCGTGTTTCGCCGGGGTTCGGCGCTGCCATGGCTACCG**GTAATGTCTTGAGTTTCCTCATT**  
**TAAATTC**TATTTTCAACTACATGTCTTCGATATGGTAACCTTTTAACAGATAAGCTGAATGGGGATCCGTGGTG  
GGACTATTTTTTGTGGCTATGGCACATGCGTTGGTGGTGGCGGTGATGATTTTCAGCCGGATTCCGCGTTTCCGGT  
GGCCACATAAACCTGCTGTCAACCTCGGCCTATTAGCAGGCGGCCATATCACTGTCTGTCAGATCAATCCTCTAC  
TGGATTGATCAGTTATTAGCTTCTACAGCAGCTTGTGCTCTGCTCAAGTACCTAACTGGAGGATTG**GTTAGTATT**  
**AGTATATCTTTGCCTTATACGAATGCACTCAGTTTTGTCTTTAAAAACGCATAATCCTAAAAAAATTGAAATCT**  
**CGTTTCATTCACTTCGGCTTCCCATCTTAATGATCTCGGTTAGTCAAGTAAAGTGACGTAGAGAGCGACTTCTAA**  
**ATGGTTGGCCCAAGTGGTGAATGTGACCCGGTTTGGCCCCCTTGTGCTCTATCTCGCATTACTTAATACACAAC**  
**TTATTGAGCGCATGAGATGACACATGTTGACTAGTTGAACCTGTTGGATGCATTATGACCTTTCATATTCTAGT**  
**CTCTCTCCTTTTTTTGGGTTCAAGATTATTGTAGTTTTCCGACTCTATTTGTCTTTATGATTTCTCTCTCTAAA**  
**AACCTTGATTTTTCATTTGTAATCTTGAATCTTATTGTAATCTCGGTGGTGTCCAATATAAATCATGTTATGGTT**  
**AGAATTTTATTTTTCTTGGGTGAACGCAACTCTTGGTTACGTGGTGAATCTGTAAACGAGAGAAAAAGTGAGA**  
**GTTGAGTCTGAGGGCTTTAAGTCGAGTGATTTTTGAGTATCTGATTCTTGTATTTTGACACAATTTGTTGGATT**  
**TAGAGGATTAGAACGTTAACCACCTAGGTGGATGCTCAACGTGGTGAGTAGCCGCCCATCTTGGGTGAACATCT**  
**GGGCCTACGAGCGAAAAATCTTTATGTTCTCTGTGTTTGAATTTACTTGAATAAATTTTGGGATTGTTAGATACCA**  
**ACAGTGGTATCAGAGCTGCTCAATCTGTGTTGGAAGCCTTCGGTCTGAATATTTCTGGTGCTCTTGGTGACCAAA**  
**ACTCTAGATCTTCACAGATTTGTATTTTTAAGGGCTTGATTTTCATTAATTTCTAAGAAAGTAAAAATAGTTTTGA**  
**TATTCACTATTTAGTGTCTTAAGACGTGTTGGTAACGAGTTTCTAAACCTATTTCTTCTTTAAAACTTGCATA**  
**TCTTGGTTGAAACTCACCTGCTCTTTCTTTGTCTAGGGTTTTCATGCGACCTAGAATCTGAGGGAACGATGTTTA**  
**ACGTTTTCTTTCAAGATTATTGTTTATCCGTGATTCTGATATTTGTACTTTATGATTGGGTATTGTTGTGATC**  
**TGCCCTTCTCTGATTGTCATTTGGTGATTTGCGTGACACTATTGCACATTATCACTTTGTGCGTATATCTCTG**  
**TGAATAAATTGTGTCTTAGTTTTGTGTACTTTTAGACTTTATACCGAAATTTTTTAAAAAATCATGGGAAGTACCAA**  
**AATTGATATTGAGATATGGTATGGCAATGAAGACTTTAGTCTCTGGAGTAAAAAATGAAGGCCCTTTTAGTACAA**  
**CAAAGATGTGTGAAAGCTATAGATGAATCATGGGGTACAAAAGTTACTGAAAATAGGAGGACTGATCAAGATAAA**  
**ATTGCATGGAGTACAATTTTCTTGCAATTTATTTGAAAGTGTGATTAGAGAGGTAGAAAAAATAAGACTGCAATA**  
**GAAATCTAGACAAAGCATGATTTTCTTTATCAAACCTAAGACCCCTCCCAACAAATGTTACTTGTGGAAACAATTT**

TTCTGTTTTCAAATTTGACCCTAATTGTGATCTTGAAGTTAATCCTGATAGATTTAATAAACTCTTTCAAGATATC  
ACTAATGGTGGTAAGACTTTTATCTGATGATAAAAAATCTGTGGCCCTACTGTCAATTTTTACCTGAGAAAATTTAAA  
GAAGTGAACATCCCCTTGAATATGAAAGAACTACTGTACAGTTAATGATATTATGACTTCTTTAAGGAATAAG  
GAACATGAAGTAAAGAGTGATTCAAAAACCTCCATAACTGGAGTAGGTTACAATATAAAAAGGTACTAATTCCTTCA  
AGAAGAAGAATAATCAATATATGAATAAAAAATTTGGGAAACCAAAAGAATATTATAGTACATCTCAAAAGGGTA  
AGTCAAAATTTAATTAGAACAACAGTAAGGCTAAAGATAGGAAGTGTTACTTTTGTGGAAAAATGGGCCACTACA  
TCCAAGATTGTATGAAAAGAATTGAGGAACGCAAAATGCAAAATAAGGTTGAAGGTGAAGCTGCTATAGCTTATG  
AAGAAACAACAACCTCAAATGGACAAGTTTATCTGACTTCTCAACCCATAGTCAAAGATGACTGGATACTAGACT  
CTGGATATACTTTCCATATGCCACCCTAATAGAGCTCTTCACTGAATTTTTATGAAACAAGTGGAGGACAAGTAAC  
TATGAGAAATGATTTTTCTGTGCAAGATTAAAGGAATTGGAAAGATTGTTTTAAAACTAGACAATGGGAATGTACT  
AACCTCAAACAAAACCTAGATACACTCCTAACTTAAAGAGAAAACCTTAATCTCTTTGGGCACACTTGATGATGAAGG  
TTTTAATACAATCATAAATAAAAGTGTTTTGACACTCCAAAATAATCTTGCTAATATCATTAAAGTAGAAAAATC  
AAATTGGATATATGTCATGAAAGCTATATCACATAAAAATCAATTTATTGCTGCTACTGTCTCCCTGCTTGACAA  
ATCTAAAATATGGCATAAAAGGTTAAGATCCATAAGTGATAAAAATCTGCATGTCTTAAAAAACAAGGTCTCTT  
GGAAAATGATAAAATTGAAAGAGTGTCATATTGTAAACATTGCATCTATGGAAAGCAGAAAAAATTACCTTTTAC  
TACTGGTACCCATAAATCTAAAGTTGTTCTTGATTACTTACATGCTGACCTGTGGGGGCCAACTTCTGTAAGTAC  
TTATTCTGGTTTTAAATACTATTTCTCTGATTGTTGATGATTTTCAAGGAAAAATTTGGGTATGTTCTTGAAAAAT  
AAATCTGATACCTTGCAAAACCTTTGTTTTCTTGGAAGCTCTTGTTGAAAATCAAGTTAACAAGAAGGTTAAAGCT  
CTTAAAGCTGATAATGGCCTTGAATTCGCAATGAGAATTTGATAAGTACTTCAGAGATAATGAGATCTTATAGG  
CATGAGACTGTCACTTACACCACACAATAGAAATGGACTCGCAGAAAGAATGAATAGGACCTTCTAAAAAGAATC  
AGGTGCATGTTGATAAGTTTCAAGGTCTTTTCAAAGTTATTCTAGGGGAGGCAGCTAAAAACTGCCTCATGTATGATA  
AATAAATCTCCCACTAAATCCCTGAATTATGATACCCCTGATCATACTTTGAAATGGACATTTTTATTGGCTATTC  
CAAAATTTAAATTTTTGGTTGTATTACTTATGTACGCTAAAGTGAAGGGAAGCTTCAGCCAAGATCTATAAAAGG  
TGAATTATTAGGATATGGGGAAGGCATAAAAGGATATAGAATCTGGTTGAGAGGTCAGGGAGGATATGGAGTTGT  
AATAAGCAGAAATGTAGTCTTTAACGAATCAGATATGCCCTGCATTAAAGAAAAATCAACTGTTGACACAGATTA  
TGATCAAAACAGGTACTTTATGCAAACCTGAACCTTTTCCGACTAACATGACCCTTGAAATGAGGATCTGAGGTGG  
AGCCTGGATTAGAGCAAGGCATAGAACCTGAACTAGACCAGTCTACAGGTTCCCTTAGAAGACTATCATTTTGGTTA  
GGGACAGAATAAGAAGAGAAATAAGGCCTCCCCTGAGATATAATGAACCTGACTTTTATTACTGCACTAAATGTTT  
AAAACCTTATTGGAATGAACCTTGTAACCTATGAAGAAGCAGTTAAGAGTAAAGACTCAAACCTTTGGCAGACAA  
CCATGGAAGAAGATGCAGTCTTAAATGAAAAATAAAACCTTGGGTCTAGTAAATAAACCAAAAGGGGGAAATTA  
TTGAATTCAAACGGATTTATAAGATAAAGGAAGGTGATCCTTTAACTGAAAATGTTAGGTTTAAAGGCCAGATTAG  
TTGCTAAAGGTTTTTAAACAAAGAGATGGAATTAACATACTGAAATTTTTTCCAGTAGTCAAGTAAACCTCTAT  
AAGAATTTTACTTTCACTTGTTTCGTAATTTGATTTTTTAATTGGAATAATTGGACGTGAAAACCTGCCTTTTTTACA  
TAGAAATTTACATGACTCAACCAAAAAGTTTTGAACAAAAGGGGAAAGAAAACCTGTGTGTGTTTATTGCAAGAAT  
CTCTTTATAGTTTTAAACAACCAAGACAATAGTACATCAGATTTGATACTTTTATCAACAGTCTTGATTTTTA  
ATAGAAGTGAATATGATCCATATTTTTATTATAAAGGAAGTAGAGGTCCAAATCTTGTTATTTACTGCTTTATG  
TGGATGATATGTTTCTTGCTGAATGTGATGTAACATAAATAACATTAAGCAAAAGTTAAAGCAAGAATTTG  
AGATGAAGGACTTAGGATCAACCAAAAGGATTTTGGGTATGGAGATTAAAGGGATAGATCTAATTATACCTTGT  
TTCTCACACAGTAGTCATATATTTTAAAAATATTGAATATATTTTCTATGAAGAAGCTAAGGATGTCACCTTACC  
TCTAGGTTGTCACTTTAAATTCAGTGCCTGAACAATGTCTTAAACCTGAAATGGAAAAGAGTAGAATGGATAATGT  
TCCTTGTGCAATGTTATTGGTTCTGTTATGTATGTTTTAGTTTGTATAAGAACTGATCTTGCTTTTGCTGTAAG  
TGTCTTGAGTAGATACATGAGTAACCCGGGTGAGTATCATTGAGAAACAATGAAATGACTACTTAGATATTTAAA  
AAGGACTACAAATGTAGGCTGATGTTCAAAAATAGTAAAATTTGAATACAACCTTTAAGGTTTTGTTGATGCAGA  
TTTTGTTGGAATTTGTGCAATAGAAAATCTACTCTGCATACGTGTTTACATTAATAATACCTTTATAAATTTG  
GAAATATCAGCTGCAAAAATAGTTTCTCTATCTCCAACAGAGGCTGAGTATATTGTTGCTACAGATGCAGTTAA  
GGAAGGTATTTGGTTGAAAATTTATTAGATAATATTGGCTTTACTAGTAATAATGCTACAGTGTATTCTGATGG  
TCAATCTGCCATACATCTAACTAGAAACCTTGTTTTTTATAATAGGACTAAACATATAGATGTTAAATTCATTT  
TATAAGATATATTATTGAATAAGAGAATAAAGATTGAAAAGGTTTCAACCAAGTATAACCTATGGATGGGAAC  
AAAGTTCTTCTTTTATACAAATTTAGGGCTTGTTTTAAATATCCTAAATGTTGTTACTAAGGATATTTTGTAGGT  
ACATAGAGCATATGAAACCATAAGGAGGAGTTAACCCCTAATTCAGATGAAACCTAAAGATGTTAAGCAAGGTGG  
AGATTGTTAAATGTGCTTAACATCTTATTATTTGAGGTCCAGTGATGTAGCCCAATAAATGTATTTCTATGG  
TTGGCCCATGTGGTAGAATGTGACTCGGTTTTGGCCCCTAGTGCTCTATCTCGCATTTACTTAATACACGACTTAT  
TGAATGGCTGAGATGATGACACCTGTTATTGGCTGAACCGTTGGATGCATTATGACCTTTTATATTCTAGTCTCT  
CTCATTTTTCTGGGTTTGAGGGTTTCAGTCTCTACTTGTCTTTATGATTTCTCTCTCTGAAAACCTTTGGTTTTCT  
ATTTGTAATCTTGAGTCTTCTAGTATTCTTGTTGATGTCCAGTGTAATCATGTTATGGTTAGAGTTTTATTGTT  
CTTGGGTGAATTTGTAATTTCTTGTTACTTTGGGGTAAATCTGTAAACGAGAGAAAAAGTGAGATTGAGTTGAGG  
GCTTTAAGTTCGAGTGATTCTTGGGTCTTTGATTCTGTATTTTGACGCACTTTGCTGGGTTCTAGTGTATTGGAG  
TGTTAATCACTTAGGTGGATACTCAACGTGGTGATTAGTCCATTTTTGAGTGAACATCCGGGCTTACAGACGAAA  
CATCTTTGTGTTCTCTGTGTTTGATTTACTCAATTTAATTTTGGGATTGTTAGATACCAACGTATTATATTCTAA  
CAAGGAACCTTGTGATTTCTTGATTCTTGCAGACTATACCAGTACATACACTTGCAACTGGGGTGGACTTCGCC  
AAGGGGTTATAATGGAATTTGTGTTGACATTTTCATTGTTATTCACTGTTTATGCAACAATTGTGGACCCCAAGA  
AGGGGTTCTTGAAGGGATGGGCCCACTTCTTACTGGTCTTGTTGTTGGGGCCAACGTCATGGCTGGTGGGCCAT  
TCTCAGGGGCTTCAATGAACCTGCAAGGTCATTGCGGCCAGCTTTGGTGAGCGGGGATTGGACCGATCACTGGG

TATACTGGGTTGGGCCACTCATTGGAGGTGGTCTTGCTGGATATATCTATGAGAACTTCTTCATTGTCAGATCTC  
ATGTTCAACTGTCAGGAGAGGAAGTTTTCTAA

>OleurTIP4;1

ATGGCTAAGATTGCCTTGGGAAATGCCCCGAGAGGCCTTTCAATCGGACTGCATCCAGGCCCTTATTGTGGAATTC  
ATTTGCACGTTTCTTTTCGTGTTTCGCCGGGGTCGGCGCTGCCATGGCTACCGATAAGCTGAATGGGGATCCGTTG  
GTGGGACTATTTTTTGTGGCTATGGCACATGCGTTGGTGGTGGCGGTGATGATTTTCAGCCGGATTCCGCGTTTCC  
GGTGGCCACATAAACCCCTGCTGTCACCCCTCGGCCATTAGCAGGCGGCCATATCACTGTCGTCAGATCAATCCTC  
TACTGGATTGATCAGTTATTAGCTTCTACAGCAGCTTGTGCTCTGCTCAAGTACCTAACTGGAGGATTGACTATA  
CCAGTACATACACTTGCAACTGGGGTGGACTTCGCCCAAGGGTTATAATGGAAATTGTGTTGACATTTTTCATTG  
TTATTCAGTGTATGCAACAATTGTGGACCCCAAGAAGGGGTTCTTGAAGGGATGGGCCACTTCTTACTGGT  
CTTGTGTTGGGGCCAACGTCATGGCTGGTGGGCCATTCTCAGGGGCTTCAATGAACCCTGCAAGGTCATTCCGG  
CCAGCTTTGGTGAGCGGGATTGGACCGATCACTGGGTATACTGGGTTGGGCCACTCATTGGAGGTGGTCTTGCT  
GGATATATCTATGAGAACTTCTTCATTGTCAGATCTCATGTTCAACTGTCAGGAGAGGAAGTTTTCTAA

>OleurTIP4;1

MAKIALGNAREAFQSDCIQALIVEFICTFLVFVAGVGAAMATDKLNGDPLVGLFFVAMAHALVVAVMISAGFRVS  
GGHINPAVTLGLLAGGHITVVRISILYWIDQLLASTAACALLKYLTGGLTIPVHTLATGVDFAQGVIMEIVLTFSL  
LFTVYATIVDPKKGFLEGMPLLTGLVVGANVMAGGPFSGASMNPARSFGPALVSGDWDHWVYVWGPLIGGGLA  
GYIYENFFIVRSHVQLSGEEVF\*

## OleurTIP5;1 Oleur061Scf8528g00015.1

>Oleur061Scf8528:7335..8665 (+ strand) class=gene length=1331

>OleurTIP5;1

ATGGCGTCCTTAAAATCCCGTTTGGAGCACACTGTTACACCCACTGCCCTCAGATCGTATCTTGCAGAGTTCATT  
TCCACATTCTTCTTCGTCTTCGCTTCTGTTGGAGCCACAATGTCCACGCGTAAGTTTTCAATTTCTTGTTTCATC  
AAAGGGTTGGAACCACAATACCAGTGACGAAAATGGGGTAAAATCGACCCCATATTTGTTAAAATTTGATTTCT  
AATTGATTGTTTTAATAGGGCTTAGTTTTGTTATTGTTTTGCTTCAATATGATTTCATTGTTTCGTACCTGTGTCGTG  
ATTACAGTGAAAATGATGCCGGATGCAGCATCAAATCTTCCGGTCTGGTAGCTATTGCAGTTGCAAAATGCCCTTT  
GCATTATCAGTAGCAGTGATGCTTCTAATATCTCCGGTGGCCATGTGAATCCGGCTGTTACATTTGGAATG  
GCTATCGGAGGCCACATAAGCATTCCGATGGCCATTTTCTACTGGATTTCTCAGACCCCTCGGCTCTGTCATAGCT  
TGCATTCTCTTAAAAGTGACCACTGTTGGACAGGTACTAAGAGTTGTCAATGCTTTAGAATGTACAGTCAAATGG  
GTAAAGCCAGTTGCGCTGAAAGATATTAACAGGTTTCTTGACATAATGGGTGTTGACAAGATATGATTGAATGAA  
AAAGTTTACTGTTTTAAACAATCTATTAATAGAATGTTATGTGACATTATGTCAATGATTATATCAACATCTATA  
GCACTGTAACATGATTGTCACTGGACACGACACTATCCGTTTGTGCATCTCTTTCTAGCAATGATCTCAAGAGTC  
TTTTCTTCTTATTTTCATTTTTGTCAGCACGTTCCAACGCACTCAATTCCACAAGAAATGACCGGTTTTGGTGCAGC  
CATACTGGAAGGCGTGATGACATTTACATTGGTGTACACAGTATATGCTGCTGCTGATCCGAGGCGAGGTTCCAT  
GTCAATAATTGGCCCGTTGGCCATAGGGCTGGTGTGTCAGGGGCTAACGTAAGTGGCATCGGGACCTTTTACCGGTGG  
CTCAATGAACCCCGCTACTCCTTCGGTTCTGCACCTGTTGGAGGAAGTTTCAAGAATCAAGCAGTCTATTGGAT  
TGGACCATTGATTGGAGCAGCCACTGCAGGAATTTTATATGAGCATGTAGTTTTCCCTGCTCAACAAGAGCCTGA  
TTCATTGAGGGGAATTCCTCATGGAGTTGAATTTTAA

>OleurTIP5;1

ATGGCGTCCTTAAAATCCCGTTTGGAGCACACTGTTACACCCACTGCCCTCAGATCGTATCTTGCAGAGTTCATT  
TCCACATTCTTCTTCGTCTTCGCTTCTGTTGGAGCCACAATGTCCACGCTGAAAATGATGCCGGATGCAGCATCA  
AATCTTCCGGTCTGGTAGCTATTGCAGTTGCAAAATGCCTTTCAGTATCAGTAGCAGTGATGATGCTTCTAAT  
ATCTCCGGTGGCCATGTGAATCCGGCTGTTACATTTGGAATGGCTATCGGAGGCCACATAAGCATTCCGATGGCC  
ATTTTCTACTGGATTTCTCAGACCCCTCGGCTCTGTCATAGCTTGCATTCTCTTAAAACACGTTCCAACGCACTCA  
ATTCCACAAGAAATGACCGGTTTTTGGTGCAGCCATACTGGAAGGCGTGATGACATTTACATTGGTGTACACAGTA  
TATGCTGCTGCTGATCCGAGGCGAGGTTCCATGTCAATAATTGGCCCGTTGGCCATAGGGCTGGTGTGTCAGGGGCT  
AACGTAAGTGGCATCGGGACCTTTTACCGGTGGCTCAATGAACCCCGCTACTCCTTCGGTTCTGCACCTGTTGGA  
GGAAGTTTCAAGAATCAAGCAGTCTATTGGATTGGACCATTGATTGGAGCAGCCACTGCAGGAATTTTATATGAG  
CATGTAGTTTTCCCTGCTCAACAAGAGCCTGATTCATTGAGGGGAATTCCTCATGGAGTTGAATTTTAA

>OleurTIP5;1

MASLKSRLHTVTPTALRSYLAEFISTFFFVFASVGATMSTLKMPDAASNSSGLVAIAVANAFALSVAVYIASN  
ISGGHVNPAVTFGMAIGGHISIPMAIFYWISQTLGSVIACILLKHVPHTSIPQEMTGFGAAILEGVMFTFLVYTV  
YAAADPRRGSMSIIIGPLAIGLVSGANVLASGPFTGGSMNPAYSFGSALVGGSFKNQAVYWIGPLIGAATAGILYE  
HVVFPAQQEPDSLRLGIPHGVEF\*

## OleurTIP5;2 Oleur061Scf0430g00024.1

>Oleur061Scf0430:47031..48350 (- strand) class=gene length=1320

**>OleurTIP5;2**

ATGGCGTCCTTAAAATCCCGTTTGGGGCACACTGTTACACCCACTGCCCTCAGATCGTATCTTGCAGAGTTCATT  
TCCACATTCTTCTTCGTCTTCGCCTCGGTTGGAGCCACTATGTCCACGCTGTAAGTTTTCTTTCTTGTTCATC  
AAAGGGTTGGAACCACAATACCAGTGACGAAAATGGGTTAAAATCGACCCCATATTTGTTAAAAATTTGATTTCT  
AATTGATTGTTTTAATAGGGCGTAGTTTGTTATTGTTTTGCTTCAGTATGATTCAATTGTTTCGTACCTGTATCGTG  
ATTACAGTGAAAATGATGCCGGATGCAGCATCAAATTCCTCCGGTCTGGTAGCTATTGCAGTTGCAAACGCCTTT  
GCATTATCAGTAGCAGTGTACATTGCTTCTAATATCTCCGGTGGCCATGTGAATCCGGCTGTTACATTTGGAATG  
GCTATCGGAGGCCACATAAGCATTCCGATGGCCATTTTCTACTGGATTTCTCAGACCCCTCGGCTCTGTCTAGCT  
TGCATTCTCTTAAAAGTGACCACTGTTGGAGAGGTACTAAGAGTTGTCAATGCTTTAGAATGTACAGTCAAATGG  
GTAAAGCCACGTTGCCTGAAAGATATTAACAGGTTTCTTGACACAATGGGTGTTGACAAGATATGATTGAATGAA  
AAAGTTTACTGTTTTAAACAATCTATTAATAGAATGTTATGTGATATTATGTCAATGATTATGTCAACATCTATA  
GATCTGTAACATGATTGTCACTGGACACGACGTGCATCTCTTTCTAGCAATGATCTCAAAGTCTTTTCTTCTTT  
TTTCATTTTTTGACGACGTTCCAACGCACTCAATTCACAAGAAATGACCGGTTTCGGTGCAGCCATACTGGAAG  
GCGTGACGACATTTACATTGGTGTACACAGTATATGCTGCTGCTGATCCGAGGCGAGGTTCCATGTCAATAATTG  
GCCCCGTTGGCCATAGGGCTGGTGTGAGGGGCTAACGTGCTGGCATTGGGACCTTTCACCGGTGGTTCGATGAATC  
CCTCCTACTCCTTCGGTCTGCACTTGTGGAGGAAGTTTCAAGAATCAAGCAGTCTATTGGATTGGACCATTGA  
CTGGAGCAGCCACTGCAGGAATTTATATGAGCATGTAGTTTTCCCTGCTCAACAAGAGCAGGATTCAATTGAGGG  
GAATTGCTCATGGAGTTGAATTTTAA

**>OleurTIP5;2**

ATGGCGTCCTTAAAATCCCGTTTGGGGCACACTGTTACACCCACTGCCCTCAGATCGTATCTTGCAGAGTTCATT  
TCCACATTCTTCTTCGTCTTCGCCTCGGTTGGAGCCACTATGTCCACGCTGAAAATGATGCCGGATGCAGCATCA  
AATTCTTCCGGTCTGGTAGCTATTGCAGTTGCAAACGCCTTTGCATTATCAGTAGCAGTGTACATTGCTTCTAAT  
ATCTCCGGTGGCCATGTGAATCCGGCTGTTACATTTGGAATGGCTATCGGAGGCCACATAAGCATTCCGATGGCC  
ATTTTCTACTGGATTTCTCAGACCCTCGGCTCTGTCTAGCTTGCATTCTCTTAAAACACGTTCCAACGCACTCA  
ATTCCACAAGAAATGACCGGTTTCGGTGCAGCCATACTGGAAGGCGTGACGACATTTACATTGGTGTACACAGTA  
TATGCTGCTGCTGATCCGAGGCGAGGTTCCATGTCAATAATTGGCCCCGTTGGCCATAGGGCTGGTGTGAGGGGCT  
AACGTGCTGGCATTGGGACCTTTCACCGGTGGTTCGATGAATCCCTCCTACTCCTTCGGTTCTGCACTTGTGGA  
GGAAGTTTCAAGAATCAAGCAGTCTATTGGATTGGACCATTGACTGGAGCAGCCACTGCAGGAATTTTATATGAG  
CATGTAGTTTTCCCTGCTCAACAAGAGCAGGATTCAATTGAGGGGAATTGCTCATGGAGTTGAATTTTAA

**>OleurTIP5;2**

MASLKSRLGHTVTPALRSYLAEFISTFFFVFASVGATMSTLKMMPDAASNSSGLVAIAVANAFALSVAVYIASN  
ISGGHVNPAVTFGMAIGGHISIPMAIFYWISQTLGSVIACILLKHVPHTSIPQEMTGFGAAILEGVTTFTLVYTV  
YAAADPRRGMSIIIGPLAIGLVSGANVLALGPFTGGSMNPSYSFGSALVGGSFKNQAVYWIGPLTGAATAGILYE  
HVVFPAQQEQDSLRLGIAHGVEF\*

## **OleurTIP5;3a Oleur061Scf7085g01025.1**

>Oleur061Scf7085:145441..146632 (- strand) class=gene length=1192

**>OleurTIP5;3a**

ATGGCTTCTCTGAAATCCCGTTTGGAGCATTCAAGTCACTGCCATTGCTCTTAGATCGTATCTTGCTGAGTTTATC  
TCTACATTCTTCTTCGTCTTTGCTGCTGCTGGGGCAACAATGTCTTCGCCTAAGCCAATTTCTTCATTTTAAAT  
TTGGAATTAATTGTTAATCCATTTGCTTTGATCATGGATCGTACCTTTTCCCTTTACATGATTTTTAATGATG  
TTTATTGATGTCAAAAAACAGGAAAATGATGCCGGATGCAGCATCGGATTCCCTCGAGTCTTGTGCAATTGCA  
GTTGCGAATGCGTTTTGCACTGTCAAGTTACAGTGTATATTTCTGCCAATATTTCCGGGGGGCCACGTGAATCCGGCT  
GTCACATTTGGAATGGTTGTGGGAGGCCATATTAGTATTCCCTATGGCTATTTTCTATTTCGATTTTCGCAAACGTTT  
GGTTCTGTCTATGGCATGCCTGCTATTAAAAGCAACCACCGCAGGACAGGTACGTCACCTCAAAGTCCCAATGAGTA  
CCGCGTACTAAATGCATCAAAAATTGATTAAATGTGTGTCTGAGTGTAAGATAAACAGACAAAAGTTTGATTAC  
CCGACTAATTCTACTGATTACAACATACTAAACATGCCACTATCGACTACCCATCAGATGTACAGATGGAAAGTT  
GCATCTTGGTGACTCAAATATCACATTATCTTTAACAGATACTTCATAATTGTTTTGCAGCATGTTCCAACATCAT  
GCAATAGAACATGAGATGACTGGTTTTGGAGGAGCAGTGTAGAGGGTGTATGACTTTTGCATTGGTGTACACG  
GTTTATGTAGCCTCGAACCTGAGGCCGGTTTTCTGCCGGTGCCATCGGCCCCCTTGGCAATTGGGCTTATTGCGGGG  
GCTAACGTTCTTGCATCAGGACCGTTTACCGGTGGATCCATGAACCCGGCATAACGATTCCGGTTCAGCCATTGTT  
GGAGGGAGTTTTAAGAATCAAGCAGTATATTGGGTTGGACCATTGTTTGGCGCAGCCATTGCTGGGATTTTACAT  
GATAATGACTGTCTGCTGCTCCAGTGCCTGATTCTTTAGGGGGAATGCTGATGGAGTGGGAGTTTAA

**>OleurTIP5;3a**

ATGGCTTCTCTGAAATCCCGTTTGGAGCATTCAAGTCACTGCCATTGCTCTTAGATCGTATCTTGCTGAGTTTATC  
TCTACATTCTTCTTCGTCTTTGCTGCTGCTGGGGCAACAATGTCTTCGCGGAAAATGATGCCGGATGCAGCATCG  
GATTCCTCGAGTCTTGTGCAATTGCAGTTGCGAATGCGTTTGCAGTGTACAGTGTATATTTCTGCCAAT  
ATTTCCGGGGGGCCACGTGAATCCGGCTGTACATTTGGAATGGTTGTGGGAGGCCATATTAGTATTCCTATGGCT  
ATTTTCTATTTCGATTTTCGCAAACGTTTGGTTCTGTCTATGGCATGCCTGCTATTAAAAGCAACCACCGCAGGACAG



CATGTTCCAACATCATGCAATAGAACATGAGATGACTGGTTTTGGAGGAGCAGTGCTAGAGGGTGTATGACTTTT  
GCATTGGTGTACACGGTTTATGTAGCCTCGAACCTGAGGCCGGTTTCTGCCGGTGCCATCGGCCCCCTTGGCAATT  
GGGCTTATTGCGGGGGCTAACGTTCTTGCATCAGGACCGTTTACCGGTGGATCCATGAACCCGGCATACGCATTC  
GGTTCAGCCATTGTTGGAGGGAGTTTTAAGAATCAAGCAGTATATTGGGTGGACCATTGTTTGGCGCAGCCATT  
GCTGGGATTTTACATGATAATGTAGTCTGTCTGCTCCAGTGCCTGATTCTTTAGGGGGAATGCTGATGGAGTG  
GGAGTT**TAA**

**>OleurTIP5;3a**

MASLKSRLHSVTAIALRSYLAEFISTFFFVFAAAGATMSSRKMPDAASDSSSLVAIAVANAFALSVTVYISAN  
ISGGHVNPAVTFGMVVGHHISIPMAIFYISQTFGSVMACLLLKATTAGQHPVTHAIEHEMTGFGGAVLEGVMTF  
ALVYTVYVASNLRPVSAGAIGPLAIGLIAGANVLASGPFTGGSMNPAYAFGSAIVGGSFKNQAVYWVGPLFGAAI  
AGILHDNVVCPAPVPDSFRGNADGVGV\*

**OleurTIP5;3b Oleur061Scf2746g00014.1**

>Oleur061Scf2746:4573..5762 (- strand) class=gene length=1190

**>OleurTIP5;3b**

**ATG**GCTTCTCTGAAATCCCGTTTGGAGCATTTCAGTCACTGCCATTGCTCTTAGATCGTATCTTGCTGAGTTTATC  
TCTACATTCTTCTTCGTCTTTGCTGCTGCTGGGGCAACAATGTCTTCGC**TAAGCCAATTTCTTCATTTTAAT**  
**TTGGAAATTAATTGTTAATCCATTTTCGTTTGATCATGGATCGTACCTTTTCCCTTTACATGATTTTTAATGATG**  
**TTTATTGATGTCATAAAAAACAGGGAATGATGCCGGATGCAGCATCGGATTCCTCGAGTCTTGTTGCAATTGCA**  
**GTTGCGAATGCGTTTGCACTGTGAGTTACAGTGTATATTTCTGCCAATATTTCCGGGGGCCACGTGAATCCGGCT**  
**GTCACATTTGGAATGGTTGTGGGAGGCCATATTAGTATTCCTATGGCTATTTTCTATTTCGATTTTCGCAACGTTT**  
**GGTTCGTGCATGGCATGCCTGCTATTAAGCAACACCACCGCAGGACAGTACGTCACCTCAAAGTCCCAATGAGTA**  
**CCGCATACTAAATGCATCAAAAATTGATTATATGTGTCTGAGTGTAAGATAAATGGACAAAAGTTTGATTACCC**  
**GACTAATTCAACTGATTACAACATACTAAACATGCCACTATCGACTACCCATCAGATGTACAGATGGAAAGTTGC**  
**ATCTTGGTGACTCAAATATCACATTATCTTTAACAGATACTTCATAATTGTTTTGCAGCATGTTCCAACATCATGC**  
**AATAGAACATGAGATGACTGGTTTTTGGAGGAGCAGTGCTAGAGGGTGTATGACTTTTGCATTGGTGTACACGGT**  
**TTACGTAGCCTCTAACCTGAGGCCGGTTTCTGCCGGTGCCATCGGCCCTTGGCAATTGGGCTTATTGCAGGGGC**  
**CAACGTTCTTGATCAGGACCGTTTACCGGTGGATCCATGAACCCGGCATAACGATTCGGTGCAGCCATTGTTGG**  
**AGGGAGTTTAAAGAATCAAGCAGTATATTGGGTGGACCATTGTTTGGCGCAGCCATTGCTGGGATTTTACATGA**  
**TAATGTAGTCTGTCTGCTCCAGTGCCTGATTCTTTAGGGGGAATGCTGATGGAGTGGGAGTT**TAA****

**>OleurTIP5;3b**

**ATG**GCTTCTCTGAAATCCCGTTTGGAGCATTTCAGTCACTGCCATTGCTCTTAGATCGTATCTTGCTGAGTTTATC  
TCTACATTCTTCTTCGTCTTTGCTGCTGCTGGGGCAACAATGTCTTCGCGGAAAATGATGCCGGATGCAGCATCG  
GATTCCTCGAGTCTTGTTGCAATTGCAGTTGCGAATGCGTTTGCAGTGTACAGTGTATATTTCTGCCAAT  
ATTTCCGGGGGCCACGTGAATCCGGCTGTGACATTTGGAATGGTTGTGGGAGGCCATATTAGTATTCCTATGGCT  
ATTTTCTATTTCGATTTTCGCAACGTTTGGTTCTGTGATGGCATGCCTGCTATTAAAAGCAACCACCGCAGGACAG  
CATGTTCCAACATCATGCAATAGAACATGAGATGACTGGTTTTTGGAGGAGCAGTGCTAGAGGGTGTATGACTTTT  
GCATTGGTGTACACGGTTTACGTAGCCTCTAACCTGAGGCCGGTTTCTGCCGGTGCCATCGGCCCCCTTGGCAATT  
GGGCTTATTGCAGGGGCCAACGTTCTTGCATCAGGACCGTTTACCGGTGGATCCATGAACCCGGCATAACGCATTC  
GGTGCAGCCATTGTTGGAGGGAGTTTTAAGAATCAAGCAGTATATTGGGTGGACCATTGTTTGGCGCAGCCATT  
GCTGGGATTTTACATGATAATGTAGTCTGTCTGCTCCAGTGCCTGATTCTTTAGGGGGAATGCTGATGGAGTG  
GGAGTT**TAA**

**>OleurTIP5;3b**

MASLKSRLHSVTAIALRSYLAEFISTFFFVFAAAGATMSSRKMPDAASDSSSLVAIAVANAFALSVTVYISAN  
ISGGHVNPAVTFGMVVGHHISIPMAIFYISQTFGSVMACLLLKATTAGQHPVTHAIEHEMTGFGGAVLEGVMTF  
ALVYTVYVASNLRPVSAGAIGPLAIGLIAGANVLASGPFTGGSMNPAYAFGAAIVGGSFKNQAVYWVGPLFGAAI  
AGILHDNVVCPAPVPDSFRGNADGVGV\*

**OleurXIP1;1a Oleur061Scf1407g06005.1**

>Oleur061Scf1407:601677..603499 (- strand) class=gene length=1823

**>OleurXIP1;1a**

**ATG**GCTGCTAATATTTGGAATGTACATGGAGTAGATGATGAAGAAAGCCAAACCAGTTTGAGCAAAATTCAGCCT  
GTCCCTCTACACCACTGCAAGTTCTTTTTTCTTAAATCTCAAGTTCAATATCTTCAGTTTCTT**GTCTTTTAT**  
**CCTGAAAAAATTTGAGGGTATTTCTTAGTTTCTTACATTTTGTCTTGGCAGGACACAACAATTGACAGCTGATCTC**  
**GATAAGAAGAAGCAAACCTCTTACCTCGAGTCAAATGCTTGGTTTGAACGAGCTTTTCTCCCTAGAC**GTTAGT****  
**ACATATCCCGGACTTGCAAATTTTAGTTTCTTCTTCTTTTAATTACTGTATTGTCTTATAAACAAGACTGTCTCT**

ATATAATCCAAGTAACTTAAGTTCTCTTGATAACTGAAGGTTTGGAGGGCATCGGTGGGAGAGCTTATTGGATCA  
GCAGTTCTAGTATTCATGATTGACACTATTGTGATCTCAACCTTTGAGACTGATATCAAAATGCCAAACCTCATA  
ATCTCAATTCTCATTGCCATTGTGCTTGCAATTCTCCTCCTCGCTGTACATCCTGTTTCCGGTGGCCACATCAAC  
CCCGTTATCTCCTTTTCGGCTGGGCTAGTAGGCCTTATCTCCATGTCACGCGCTATAGTTTACATCCTAGCCCAA  
TGCATTGGTGAATACTTGGTGCACCTGGCCCTCAAAGCCGTAGTGAGCAGCACCATTGAACAAAACCTTTTCACTT  
GGAGGTTGCACTCTAACAGTGATTGCACCTGGACCCAATGGACCCATAACCCCTTGGCCTTGAGACGGCACAAGCC  
TTTTGGCTCGAGATTTTCTGCACCTTTGTTTTCTTTTCTTTTGGCTTCAATTTGGATGGCATATGATCATCGCCAAGCA  
AAGAATTTAGGCCTTGTCTTGTTTTTTCAATTATAGGACTTGTGCTAGGCCTCTTAGTGTTTATTTCACCACCT  
GTCACCTGCCAAAAGGGCTATGCCGGGGCAGGAATGAACCCTGCTAGGTGCCTTGGGGCTGCAATTGTTAGAGGT  
GGCCACCTCTGGGATGGCCACTGGGTGTTTTGGGCCGGGCTGCTATTGCTTGTGTTGCCTTCTATTTATACACA  
AAGATAATTCCACGGCAGCACCATCATGCAAAGGGCTATGGACATGATTTCTTCGATACTGTGAAGGCTATGCTT  
GGATTTGTTGATCAC**TGA**

>*OleurXIP1;1a*

**ATG**GCTGCTAATATTTGGAATGTACATGGAGTAGATGATGAAGAAAGCCAAACCAAGTTTGAGCAAAATTCAGCCT  
GTCCCTCTACACCAAGTGAAGTTCTTTTTTCTTAAATCTCAAGTTCAATATCTTCAGTTTCTTTGACACAACAA  
TTGACAGCTGATCTCGATAAGAAGAAGCAAACCTCCTCTTACCTCGAGTCAAATGCTTGGTTTTGAACGAGCTTTTC  
TCCCTAGACGTTTGGAGGGCATCGGTGGGAGAGCTTATTGGATCAGCAGTTCTAGTATTCATGATTGACACTATT  
GTGATCTCAACCTTTGAGACTGATATCAAAATGCCAAACCTCATAATCTCAATTCTCATTGCCATTGTCGTTGCA  
ATTCTCCTCCTCGTGTACATCCTGTTTCCGGTGGCCACATCAACCCGTTATCTCCTTTTCGGCTGGGCTAGTA  
GGCCTTATCTCCATGTCACGCGCTATAGTTTACATCCTAGCCCAATGCATTGGTGCAATACTTGGTGCACTGGCC  
CTCAAAGCCGTAGTGAGCAGCACCATTGAACAAAACCTTTTCACTTGGAGGTTGCACTCTAACAGTGATTGCACCT  
GGACCCAATGGACCCATAACCCCTTGGCCTTGAGACGGCACAAGCCTTTTGGCTCGAGATTTTCTGCACCTTTGTT  
TTCCTTTTTTGCTTCAATTTGGATGGCATATGATCATCGCCAAGCAAAGAATTTAGGCCTTGTCTTGTTTTTTCA  
ATTATAGGACTTGTGCTAGGCCTCTTAGTGTTTATTTCCACCCTGTCACTGCCAAAAGGGCTATGCCGGGGCA  
GGAATGAACCCTGCTAGGTGCCTTGGGGCTGCAATTGTTAGAGGTGGCCACCTCTGGGATGGCCACTGGGTGTTT  
TGGGCCGGGCTGCTATTGCTTGTGTTGCCTTCTATTTATACACAAAGATAATTCCACGGCAGCACCATCATGCA  
AAGGGCTATGGACATGATTTCTTCGATACTGTGAAGGCTATGCTTGGATTTGTTGATCAC**TGA**

>*OleurXIP1;1a*

MAANIWNVHGVDDDEESQTSLSKIQPVSTPVQVLFNLKFNIFSFLTQQLTADLDKKKQTPLTSSQMLGLNELF  
SLDVWRASVVELIGSAVLVFMIDTIVISTFETDIKMPNLIISILIAIVVAILLAVHPVSGGHINPVISFSAGLV  
GLISMSRAIVYILAQCIGAILGALALKAVVSSTIEQNFSLGGCTLTVIAPGPNPITLGLETAQAFWLEIFCTFV  
FLFASIWMAYDHRQAKNLGLLVFSIIIGLVLLVFISTVTAKKGYAGAGMNPARCLGAAIVRGHGLWDGHVWF  
WAGPAIACVAFYLYTKIIPRQHHAKGYGHDFDFTVKAMLGFDVH\*

## *OleurXIP1;1b Oleur061Scf4628g08012.1*

>*Oleur061Scf4628:814896..816717 (+ strand) class=gene length=1822*

>*OleurXIP1;1b*

**ATG**GCTGCTAATATTTGGAATGTACATGGAGTAGATGATGAAGAAAGCCAAACCAAGTTTGAGCAAAATTCAGCCT  
GTCCCTCTACACCAATGCAAGTTCTTTTTTCTTAAATTTCAAGTTCAATATCTTCAGTTTCTT**GTCTTTTTTC**  
**CTGAAAAATTTTGAGGGTATTTCTTAGTTTCTTACATTTTGCTTGGCAG**GACACAACAATTGACAGCTGATCTTG  
ATAAGAAGAAGCAAACCTCCTCTTACCTCGAGTCAAATGCTTGGTTTTGAACGAGCTTTTCTCCCTAGAC**GTTAGTA**  
**TATATCCCGACTTGTAATTTTAGTTTCTTCTTCTTTTAATTACTGTATAGTCTTATAACAAGACTGTCCTA**  
**TATAATCCAAGTAACTTAAGTTTTCTTGATACTGAAGGTTTGGAGGGCATCGGTGGGAGAGCTTATTGGATCAG**  
CAGTTCTAGTATTCATGATTGACACTATTGTGATCTCAACCTTTGAGACTGATATCAAAATGCCAAACCTCATAA  
TCTCAATTCTCATTGCAATTGTCGTTGCAATTCTCCTCCTCGCTGTACATCCTGTTTCCGGTGGCCACATCAACC  
CCGTTATCTCCTTTTCGGCTGGGCTAGTAGGCCTTATCTCCATGTCACGCGCTATAGTTTACATCCTAGCCCAAT  
GCATTGGTGAATACTTGGTGCACCTGGCCCTCAAAGCCGTAGTGAGCAGCACCATTGAACAAAACCTTTTCACTTG  
GAGGTTGCACTCTAACAGTGATTGCACCTGGACCCAATGGACCCATAACCCCTTGGCCTTGAGACGGCACAAGCCT  
TTTGGCTCGAGATTTTCTGCACCTTTGTTTTCTTTTGGCTTCAATTTGGATGGCATATGATCATCGCCAAGCAA  
AGAATTTAGGCCTTGTCTTGTTTTTTCAATTATAGGACTTGTGCTAGGCCTCTTAGTGTTTATATCCACCACCTG  
TCACTGCCAAAAGGGCTATGCCGGGGCAGGAATGAACCCTGCTAGGTGCCTTGGGGCTGCAATTGTTAGAGGTG  
GCCACCTCTGGGATGGCCACTGGGTGTTTTGGGCCGGGCTGCTATTGCTTGTGTTGCCTTCTATTTATACACAA  
AGATAATTCCACGGCAGCACCATCATGCAAAGGGCTATGGACATGATTTCTTCGATACTGTGAAGGCTATGCTTG  
GATTTGTTGATCAC**TGA**

>*OleurXIP1;1b*

**ATG**GCTGCTAATATTTGGAATGTACATGGAGTAGATGATGAAGAAAGCCAAACCAAGTTTGAGCAAAATTCAGCCT  
GTCCCTCTACACCAATGCAATTCAATATCTTCAGTTTCTTTGACACAACAATTGACAGCTGATCTTGATAAGAAG  
AAGCAAACCTCCTCTTACCTCGAGTCAAATGCTTGGTTTTGAACGAGCTTTTCTCCCTAGACGTTTGGAGGGCATCG  
GTGGGAGAGCTTATTGGATCAGCAGTTCTAGTATTCATGATTGACACTATTGTGATCTCAACCTTTGAGACTGAT  
ATCAAAATGCCAAACCTCATAATCTCAATTCTCATTGCAATTGTCGTTGCAATTCTCCTCCTCGCTGTACATCCT

GTTTCGGGTGGCCACATCAACCCCGTTATCTCCTTTTCGGCTGGGCTAGTAGGCCTTATCTCCATGTCACGCGCT  
ATAGTTTACATCCTAGCCCAATGCATTGGTGCAATACTTGGTGCACTGGCCCTCAAAGCCGTAGTGAGCAGCACC  
ATTGAACAAAACCTTTTCACTTGGAGGTTGCACTCTAACAGTGATTGCACCTGGACCCAATGGACCCATAACCCCTT  
GGCCTTGAGACGGCACAAGCCTTTTGGCTCGAGATTTTCTGCACCTTTGTTTTCTTTTGTCTCAATTTGGATG  
GCATATGATCATCGCCAAGCAAAGAATTTAGGCCTTGTTCTTGTTTTTCAATTATAGGACTTGTGCTAGGCCTC  
TTAGTGTTTATATCCACCACTGTCACTGCCAAAAGGGCTATGCCGGGGCAGGAATGAACCTGCTAGGTGCCTT  
GGGGCTGCAATTGTTAGAGGTGGCCACCTCTGGGATGGCCACTGGGTGTTTTGGGCCGGGCCTGCTATTGCTTGT  
GTTGCCTTCTATTTATACACAAAGATAATTCCACGGCAGCACCATCATGCAAAGGGCTATGGACATGATTTCTTC  
GATACTGTGAAGGCTATGCTTGGATTTGTTGATCAC**TGA**

**>OleurXIP1;1b**

MAANIWNVHGVDDDEESQTSLSKIQVPVSTPMQFNIFSFLTQQLTADLDKKKQTPLTSSQMLGLNELFSLDVWRAS  
VGELIGSAVLVFMIDTIVISTFETDIKMPNLIISILIAIVVAILLLAVHPVSGGHINPVISFSAGLVGLISMSRA  
IVYILAQCIGAILGALALKAVVSSTIEQNFSLGGCTLTVIAPGPNGPITLGLETAQAFWLEIFCTFVFLFASIWM  
AYDHRQAKNLGLVLVFSIIIGLVLLVFISTTVTAKKYAGAGMNPARGCLGAAIVRGHGLWDGHVFWAGPAIAC  
VAFYLYTKIIPRQHHHAKGYGHDFDFTVKAMLGFDH\*

## **OleurXIP1;2a Oleur061Scf0694g04001.1 corrected**

>Oleur061Scf0694:467273..468886 (- strand) class=gene length=1614

**>OleurXIP1;2a**

**ATG**GCTGGTAATAATGGGCATGTAAATGTAGAATATGATGAAGAAGGCTTGAGTGGTGCAAGCAAAATTC AACCT  
GTCTTCTCTACTCCAATGCAAGTTCATTTCTTTCTTTGAACCTTTTATATTATTATATTAAATTTTCAAAATCTTG  
TTATAGTTGATAAAAATAGGGGGTGGACATGGTTCCGTTTAATCCTAGTTCGAAGATAATCGAATCGAACTCAAT  
CATGAATCAATTATTTTTTTGGTAATGGAACATAATGGTTTTTATTTTATTTTATTTTCTAAAGATATGGAACCGA  
GTTAAGTTCGATTTTCATTTAATTTTGGTCTGGTTTGGTTTGATTCCATTTTAAAGTAACGGAACCTGAACCGAAT  
CCTTAAAGAAGAAGAAGAAGAAATCATTGGTTTCATGATTAAGAAAGCCATTGGTTCGTGGTTCGCTTCGATTCT  
CTTGGAATCAAACCAAATGGACCATGTCTACCCTAGGTAAAAATATAGTCAATTTAGATTTTAAATAGTTATAG  
TGCTTGTGTTGGTAGAGATTTTGTTAATTGATTTTTTGACCGATAGGATTCTACTTGTGAGAAAAAGAATTCAAAA  
CGACGGCTGGAATAGTGAAATAATGGTAAAAAACTAATGTTAATTGGATTAAAAATCTCTACCAAACATGCTCAT  
AGCAGTGAACCTGAAAGAATAGATAGGAAAGAACAATCACTCTTTTCTTTTCTTTTCTTTTCTTTTCTTTTCTTTT  
TTTTCTCTTTTTCTTTCTTTCTTTCTTTCTTTCTTTCTTTCTTTCTTTCTTTCTTTCTTTCTTTCTTTCTTTCT  
ATCGTAGCTGACCTTAAATTTATTAAGAATATTATGTTTCTTTCTTTCTTTCTTTCTTTCTTTCTTTCTTTCTTT  
AATAGAAAGATGAAAATGATTCAAGTAGTCCATCCAAAATTTATAAAGAATAACCAATAGTTTATCTTTTGTGTA  
GGTTTTCTTTAAAAATCTTGTTGTTCTGGGAAGTTAAAACTGTGTATGCTTAGCAGGCCAGAGAACAGGACAGAT  
GAGGAGAAAATGAAGAAGACAACCTTCTCTTACTCTGAGTGAATTGCTGGGTTTGGACGACTTCTTTTCTCTCAGAT  
GTTAGTACTTCTTTCTCTTCAAGAAAATGTCTTTAGATTAGTGTTCAAAGATAAAATTTTCATAAATAAACATGT  
CATGTCTTCAATAATTTAACTTTTAAACAAGATAGTTCAACTTAGTATTGGAATGGCAAAGATCCACCGTTCAAG  
TTTCACCAATTACTTACATGCGGAAAACCTGGATTTAAATAAATCAATATGCCGTATATCTAACAATTTAACTTT  
TAAATGAGATAATATGAGTAAGAAAATATCATGTTATTTTTGTTTATTCTTGAAGGTTTGGAGAGCCTCAGTAGG  
CGAGCTGGTTGGCACGGCCGTTCTTGTATTCTGCTTGACACTATTGTGATATCAACCATTGAGTCTGATATCAA  
AATTCCAAACCTTGACTATCAATCCTTGCAGCCATTATTATTGCTATACTACTTCTTGTGTACATCCAGTTTC  
CGGTGGCCACATCAACCCGTTATCTCCTTCTCTGCCGCCCTGGTTGGGTTAATCTCTATGTCGAAAGCCTTCAT  
ATACATTGTTGCACAATGTCTTGGAGCCGTGCTAG**GTG**CGGGTTGAAAACCAATGAACAACTTTATTTGTTT  
CAAAGTAGTCCCCTACGTTTATGTTTTCTTTTCAGCTTGATGACTATGGCAACATGTTTCGACTTAAATTGGATGG  
TCAAAGTGAACAAAAAGCAAACACTACTTAGGCCTGTTTGAAAGGGCCAATTTTCCATGGAAAATGGAAACATTTT  
TCCCTTTTGGCCTGTTTGATTGCAATAATTTTCTAACCCCCACATGACCATTTTTCCTTGATTTTGTGGAAAAACG  
GGAATTGGTTTTCCAGCTGATTTTTTCTTTTTTTTTTTTTTAATATTTTTTGGCAATTGGAACAAATTCATTTAT  
AATTGTCAAAAATTCATCATTTTAAATTGACAATTTTCATGAAACACAAAGTCAAATGAACACTAAAAGATCCAA  
AATTTCAACATTTTTTAAGTGAAAAATTATACCAATCAAACACATTTAATTGACAATTTCCAATAAAAATAAGTTC  
TAGACAATTCAATTCTCTGAAATTCTTTTCTTTTCAACCAAATTTCAATCTTACAATCAAACGGATCCTTAGGG  
TTATTCCCCCTGTATAGAGAGTTTTAGCGCAGCACCCATGTGGTTGGAATTTTTTTTCCCAAAGCTCAATAGAA  
TAATGCCAAGTGTCTCCTTTAAACAAATCTAGAAAGTTTGTCTATACACATGGCACGGTTCAACCACTTAAAGT  
ATGTTTCGTTTAGATTAAATCATCACATATTTCAAATCTTCTATTACAATATACTAAAAATCTAATTTTAATC  
CTTACCAAACACCATCTAAATAAAGTTTCGATAATGGGTTGAAATTTTGCTATGAGTTGAGCGACTAACAATATTT  
**GCTTAC**AGTGTGCACTAGCTCTTAAAGCTGTGGTCAGTAGCACCATTGAAGAAACCTTCTCACTTGGCGGCTGCAC  
CCTGACTGTGATTGCACCCGGCCTGAATGGACCTGACTACGGTAGGCCTCGAGACGGTCCAAGCCTTTGGCTAGA  
AATATTTTGCACCTTTGTGTTCTTTTGTCTTCAATTTGGATGGCATATGATCCACGGCAAGCAAAGGAATTAGG  
TCATGTCCTCATCTTTTCAATTGTGGGAGTTGTGTTAGGTCTCCTAGTATTTATCTCCACCACTGTACAGCCAA  
AAAGGGATATGCTGGGGCCGGGATGAACCCGGCTAGGTGTTTTGGCCCGGCGATTGTTAGAGGCGGCCACCTATG  
GAATGTCTACTGGGTTTTCTGGGCTGGCCCGACCATTGCATGCGTGGCATTCTATTTGTACACACAGATTATTC  
ATGTCAGCACCAACCGGTGCAAGTATTCTTATGATCATGATTTCTATAATGTTGTCAAGGCTATATTT**TGA**

**>OleurXIP1;2a**

**ATG**GGCTGGTAATAATGGGCATGTAAATGTAGAATATGATGAAGAAGGCTTGAGTGGTGCAAGCAAAATTCAACCT  
GTCTTCTCTACTCCAATGCAAAACAGGACAGATGAGGAGAAAATGAAGAAGACAACTTCTCTTACTCTGAGTGAA  
TTGCTGGGTTTGGACGACTTCCTTTTCTCAGATGTTTGGAGAGCCTCAGTAGGCGAGCTGGTTGGCACGGCCGTT  
CTTGATTATCATGCTTGACACTATTGTGATATCAACCATTGAGTCTGATATCAAAATTCCAAACCTTGTACTATCA  
ATCCTTGCAGCCATTATTATTGCTATACTACTTCTTGTGTACATCCAGTTTCCGGTGGCCACATCAACCCGGTT  
ATCTCCTTCTCTGCCGCCCTGGTTGGGTTAATCTCTATGTCGAAAGCCTTCATATACATTGTTGCACAATGTCTT  
GGAGCCGTGCTAGGTGCACTAGCTCTTAAAGCTGTGGTCAGTAGCACCCTGAAGAAACCTTCTCACTTGGCGGC  
TGCACCCTGACTGTGATTGCACCCGGCCTGAATGGACCTGCTACGGTAGGCCTCGAGACGGTCCAAGCCTTTTGG  
CTAGAAATATTTTGCACCTTTTGTGTTCTTTTTGCTTCAATTTGGATGGCATATGATCCACGGCAAGCAAAGGAA  
TTAGGTCATGTCCTCATCTTTTCAATTGTGGGAGTTGTGTTAGGTCTCCTAGTATTTATCTCCACCACTGTCACA  
GCCAAAAGGGATATGCTGGGGCCGGGATGAACCCGGCTAGGTGTTTTGGCCCGGCGATTGTTAGAGGCGGCCAC  
CTATGGAATGTCTACTGGGTTTTCTGGGCTGGCCCGACCATTGCATGCGTGGCATTCTATTTGTACACACAGATT  
ATTCCATGTCAGCACCACCGGTGAAGTATTCTTATGATCATGATTTCTATAATGTTGTCAAGGCTATATTT**TGA**

**>OleurXIP1;2a**

MAGNNGHVNVVEYDEEGLSGASKIQPVFSTPMQNRTDEEKMKKTTSLTLSELLGLDDFLSSDVWRASVGELVGTAV  
LVFMLDTIVISTIESDIKIPNLVLSILAAIIIAILLLAVHPVSGGHINPVISFSAALVGLISMSKAFIYIVAQCL  
GAVLGALALKAVVSSTTEETFSLGGCTLTVIAPGLNGPATVGLETVQAFWLEIFCTFVFLFASIWMAYDPRQAKE  
LGHVLIIFSIVGVVLGLLVFISTTVTAKKGYAGAGMNPARGFPAIVRGHLLWNVYVWFVWAGPTIACVAFYLYTQI  
IPCQHHRSKYSYDHDFFYNVVKAI\*

## **OleurXIP1;2b Oleur061Scf0386g00009.1 Corrected**

>Oleur061Scf0386:689..2303 (- strand) class=gene length=1615

**>OleurXIP1;2b**

**ATG**GGCTGGTAATAATGGGCATGTAAATGTAGAATATGATGAAGAAGGCTTGAGTGGTGCAAGCAAAATTCAACCT  
GTCTTCTCTACTCCAATGCAAGTTCATTTCTTTCTTTGAACCTTTTATATTATTATATTAAATTTTCAAAATCTTG  
TTATAGTTGATAAAAAATAGGGGGTGGACATGGTTCCGTTTAATCCTAGTTCCAAGATAATCGAATCGAACTCAAT  
CATGAATCAATTATTTTTTGGTAATGGAACATAATGGTTTTTATTTTATTTTCTAAAGATATGGAACCGAG  
TTAAGTTCGATTTTCATTTAATTTTGGTCTGGTTTGGTTTGATTCCATTTTTAAGTAACGGAACCTGAACCGAATC  
TTAAAGAAGAAGAAGAAGAAATCATTGGTTTTCATGATTAATAAAGCCATTGGTTCGTGGTTCGCTTCGATTCTCT  
TGAATCAAAACCAAGGACCATGTCTACCCTAGGTAAATAATATAGTCAATTTAGATTTTAATAGTTATAGTG  
CTTGTGTTGGTAGAGATTTTGTTAATTGATTTTTTGACCGATAAGATTCTACTTGTGAGAAAAAATTCAAAAACG  
ACGGCTGGAATAGTGAAATAATGGTAAAAAACTAATGTTAATTGGATTAAAAATCTCTACCAAAACATGCTCATAG  
TAGTGAACCTGAAAGAATAGATAGGAAAGAACAATCACTCTTTTCTTTTCTTTTCTTTTCTTTTCTTTTCTTTT  
TTCCTTTTTTTCTTTCTTTCTTTCTTTCTTTTCTTTTCTTTTCTTTTCTTTTCTTTTCTTTTCTTTTCTTTT  
TTCCTTTTTTTCTTTCTTTCTTTCTTTCTTTTCTTTTCTTTTCTTTTCTTTTCTTTTCTTTTCTTTTCTTTT  
CTGACCTTAAATTTATTAAGAATATTATGTTTCTTCAAATCTCGTAGTTGATACGTCCTCGTGAACCTAAATAGAA  
AGATGAAAATGATTCAAGTAGTCCATCCAAAATTTATAAGAATAACCAATAGTTTATCTTTTGTGAGGTTTTT  
TTTAAAAATCTTGTTGTTCTGGGAAGTTAAACTGTGTATGCTTAGCAGGCCAGAGAAACAGGACAGATGAGGAGA  
AAATGAAGAAGACAACCTTCTCTTACTCTGAGTGAATTGCTGGGTTTGGACGACTTCCTTTCTCTCAGATGTTAGTA  
CTTCTTTCTCTCTTCAAGAAAATGTCTTTAGATTAGTGTTCAAAGATAAAATTTTTCATAAAATAACATGTCATGTC  
TTCATAAATTTAACTTTTAAACAAGATAGTTCAACTTAGTATTGGAATGGCAAAGATCCACCGTTCAAGTTTCAC  
CAATTACTTACATGCGGAAAACCTGGATTTAAATAAATCAATATGCCGTATATCTAACAATTTAACTTTTAAATG  
AGATAATATGAGTAAGAAAATATCATGTTATTTTGTGTTTATTCTTGAAGGTTTGGAGAGCCTCAGTAGGCGAGCT  
GGTTGGCAGCGCCGTTCTTGTATTGATGCTTGACACTATTGTGATATCAACCATTGAGTCTGATATCAAAATTC  
AAACCTTGACTATCAATCCTTGCAGCCATTATTATTGCTATACTACTTCTTGTCTATACATCCAGTTTTCCGTGG  
CCACATCAACCCGGTTATCTCCTTCTCTGCGGCCCTGGTTGGGTTAATCTCTATGTCGAAAGCCTTCATATACAT  
TGTTGCACAATGTCTTGGAGCCGTGCTAGGTGCGGGTTGAAAACCAATGAACAACTTTATTTTGTTCAAAGT  
AGTCCCCTCAGTTTTATGTTTTCTTTTCTTTTCTTTTCTTTTCTTTTCTTTTCTTTTCTTTTCTTTTCTTTT  
TGAACAAAAGCAAACTACTTAGGGCCTGTTTGAAGGGCCAATTTTCCATGGAAAATGGAAACATTTTCCCTT  
TTGGCCTGTTTGATTGCAATAATTTTCTAACCCCCACATGACCATTTTTCTTGATTTTGTGGAACCGGAATT  
GGTTTTCCAGCTGATTTTTTTTTTTTTTTTTTTTTTAAATTTTTTTGGCAATTGGAACAAATTCATTTTATAATTGTC  
AAAAATTCATCATTTTTAATTGACAATTTTCATGAAACACAAAGTCAAATGAACACTAAAAAGATCCAAAATTTCA  
ACATTTTTTAAAGTAAAAATTTATACCAATCAAACACATTTAATTGACAATTTCCAATAAAAATAAGTTCTAGACAA  
TTCAATTCTCTGAAATTTCTTTTCTTTTCAACCAATTTCAATTTTACAATCAAACGGATCCTTAGGGTTATTCC  
CCCCTGTATAGAGATTTTACGCGCAGCACCCATGTGGTTGGAATTTTTTTTCCGCAAGCTCAATAGAATAATGC  
CAAGTGTCTCCTTTTAAACAAATCTAGAAAGTTGTCTATACACATGGCACGGTTCAACCACCTTAAAGTATGTT  
TCGTTTAGATTAAAAATCATCACATATTTCAAATCTTCTATTACAATATACTAAAAATCTAATTTTAAATCCTTAC  
CAAACACCATCTAAATAAAGTTCGATAATGGGTTGAAATTTTGTCTATGAGTTGAGCGACTAACAATATTTGCTTA  
CAGGTGCACTAGCTCTTAAAGCTGTGGTCAGTAGCACCCTGAAGAAACCTTCTCACTTGGCGGCTGCACCTTGA  
CTGTGATTGCACCCGGCCTGAATGGACCTGCTACGGTAGGCCTCGAGACGGTCCAAGCCTTTTGGCTAGAAATAT

TTTGCACCTTTGTGTTCTTTTTGCTTCAATTTGGATGGCATATGATCCACGGCAAGCAAAGGAATTAGGTCATG  
TCCTCATCTTTTCAATTGTGGGAGTTGTGTTAGGTCTCCTAGTATTTATCTCCACCACTGTCACAGCCAAAAAG  
GATATGCTGGGGCCGGGATGAACCCGGCTAGGTGTTTTGGCCCGGCGATTGTTAGAGGCGGCCACCTATGGAATG  
TCTACTGGGTTTTCTGGGCTGGCCCGACCATTGCATGCGTGGCATTCTATTTGTACACACAGATTATTCATGTCT  
AGCACCACCGGTCGAAGTATTCTTATGATCATGATTTCTATAATGTTGTCAAGGCTATATTT**TGA**

**>OleurXIP1;2b**

**ATG**GCTGGTAATAATGGGCATGTAAATGTAGAATATGATGAAGAAGGCTTGAGTGGTGCAAGCAAAATTCAACCT  
GTCTTCTCTACTCCAATGCAAAACAGGACAGATGAGGAGAAAATGAAGAAGACAACCTTCTCTTACTCTGAGTGAA  
TTGCTGGGTTTGGACGACTTCTTTTCTCAGATGTTTGGAGAGCCTCAGTAGGCGAGCTGGTTGGCACGGCCGTT  
CTTGATATTCATGCTTGACACTATTGTGATATCAACCATTGAGTCTGATATCAAAATTCCAAACCTTGTACTATCA  
ATCCTTGCAGCCATTATTATTGCTATACTACTTCTTGTCTATACATCCAGTTTTTCGGTGGCCACATCAACCCGGTT  
ATCTCCTTCTCTGCCGCCCTGGTTGGGTTAATCTCTATGTCGAAAGCCTTCATATACATTGTTGCACAATGTCTT  
GGAGCCGCTGCTAGGTGCACTAGCTCTTAAAGCTGTGGTCAGTAGCACCCTGAAGAAAACCTTCTCACTTGGCGGC  
TGCACCCTGACTGTGATTGCACCCGGCCTGAATGGACCTGCTACGGTAGGCCTCGAGACGGTCCAAGCCTTTTGG  
CTAGAAATATTTTGCACCTTTGTGTTCTTTTTGCTTCAATTTGGATGGCATATGATCCACGGCAAGCAAAGGAA  
TTAGGTCATGTCCTCATCTTTTCAATTGTGGGAGTTGTGTTAGGTCTCCTAGTATTTATCTCCACCACTGTCACA  
GCCAAAAAGGGATATGCTGGGGCCGGGATGAACCCGGCTAGGTGTTTTGGCCCGGCGATTGTTAGAGGCGGCCAC  
CTATGGAATGTCTACTGGGTTTTCTGGGCTGGCCCGACCATTGCATGCGTGGCATTCTATTTGTACACACAGATT  
ATTCCATGTCAGCACCACCGGTCGAAGTATTCTTATGATCATGATTTCTATAATGTTGTCAAGGCTATATTT**TGA**

**>OleurXIP1;2b**

MAGNNGHVNV EYDEEGLSGASKIQPVFSTPMQNRTDEEKMKKTTSLT LSELLGLDDFLSSDVWRASV GELVGTAV  
LVFMLDTIVISTIESDIKIPNLVLSILAIIIIAILLLAIHPVFGGHINPVISFSAALVGLISMSKAFIYIVAQCL  
GAVLGALALKAVVSSTTEETFSLGGCTLTVIAPGLNGPATVGLETVQAFWLEIFCTFVFLFASIWMAYDPRQAKE  
LGHVLIFSIVGVVLGLLVFISTTVTAKKGYAGAGMNPARCFCGPAIVRGH LWNVYVWFVWAGPTIACVAFYLYTQI  
IPCQHRSKYSYDHDFYNVVKAI F\*

**OleurXIP1;3 Oleur061Scf1977g00011.1**

>Oleur061Scf1977:43695..44812 (- strand) class=gene length=1118

**>OleurXIP1;3**

**ATG**GCCGGTTATGATGGGCATGTAAATGTAGAATATGATGAAGAAAGCTTGAATAGTGCAAAACAAAATTCAACCT  
GTCTTCTCTACACCAATGCAAGTTCAATTTTCTTTCTTCAACTTTTTCTTATTTATATATTTTTTTTCAAACTCTTG  
TTGTAGTTGGTAAAAAATAGTCGATTTAGATTTTCCAATAGGTGTAACAGTGAAGCGAACGAAAAGATGAGAAA  
GACGTTACAGTAGATATGTATCCATATATAGTAGATTCCAAATTTATTAAGAATAATGCATAATTTATCATTTG  
TTGTGGTTTCTTCAAATTTCTTGTCTGTTTTGATAAGTTAAACTTCGAACGTTTAGCAGGCCAGAGCACTGGACA  
GATGAGCAGAAAAGGAAGAAGAATACTTCTCTTACACTGAGTGAATTGCTGGGCTTTGAAGACTTCCTTTCTTTA  
GATGTTTGTACCTTTTTTCTTCAACCACCGCGCCCTGCCCTCCCCACCCCACTCAAAGATTAAATATAC  
ATGATTAAACATGTCATTAGTAAAGTCTTCCGAATGATGCGATTCTATATAGTGTTAGAATGACAAAATCTTGCT  
TTAAAGACTCGCCGCCGACCGGTATGAAAATTATGCATATGATTGAGCCTTTTGATGAGAATATTTCAACCTAC  
ATGTGAAAGGGCGTGCTAAAAATTGAATTTAAATAAATAAATTTTTTCTATCTAAAAATTTAACTTTTAAACA  
AGATGATTCTTGTCTTACTCTTGAAGTTTGGAGAGCCTCAGTGGGAGAACTGATTGGCACAGCAGTCTTGTGTT  
**CATG**CTTGACAGTATTGTGATATCAACCAATGAGACTGATATCAAAATGCCAAACCTTGATTTGTCAATCCTTGC  
AGCCATTATTATTGCAATACTACTTCTTGCAGTGCATCCTATTTCTGGAGGCCACATCAACCCAGTTATCTCCTT  
CTCGGCTGCCCTAGTCGGGTTGATCTCTATGTCGAAAGCCTTAATCTACATTATTGCACAATGTCTTGAGCCGC  
GCTAGGTGAGGGTTAAACTCCCTATCGACGAACCTTATTTTGTTCCAAAGTAGTCCATGAAGTTCATGTTGTCTT  
CCAGTTTGATGACTAAAGTTAAATTTCTTGAAAAATGCTACTTGTACAGATTTTTTTAACAGACGGGTACAGGT  
GCTAAGCTGATAAGATTTTATTGGTTGGTTTAACTTTGTTTTGTTGTGCCAAATGGTGTGAAATCTTGTCAACTT  
AGCATTCTGTTAAACAGTTTGTACAAGTAGCATTCTCAAATTTCTTTAGTTTTTCTAATAGAACGTTTGGCTT  
AGATCAGATGATCAAGGTGAAACAAAAAGCAAACCTCTAGTTATCACTCTAAAGCAAAGAAATGTTTCGATAAAATA  
TATGAAACCTCACTATAAATTGAGTGACTAACAATGTTTTTTTTACGCGACTACAGGTGCACTAGCTCTTAAAGCT  
GTGGTTAGTAGCACCATTGAACAAACCTTCTCACTTGGAGGCTGCACCCTGACAGTGATTGCCCTGGCCAGAAT  
GGGCCGTTTACAATCGGCCTCGAGACTGCCCAAGCCTTTTGGCTAGAAATAATTTGTACCTTCGTACTCCTTTTT  
GCTTCAGTTTGGATGGCATATGATCATCGCCAAAGCAAAGGCATTAGGTCGTGTTCTTGTCTTTTCAATTGTGGGA  
GTTGTGCTAGGTCTCTTAGTGTTTCATCTCCACCAGTCACGGCCAAAAAGGGCTACGCCGGGGCGGGGATGAAC  
CCGGCTAGGTGTTTTGGTGCAGCAGTTGTTAGAGGTGGCCACCTATGGAATGGACACTGGATTTTCTGGGTGGGC  
CCGGCCATTGCTTGGCTGGCCTTCTATTTGTACACGAAGATTATTCCACGTCAGCNATTTTGTGAA**TAA**

**>OleurXIP1;3**

**ATG**GCCGGTTATGATGGGCATGTAAATGTAGAATATGATGAAGAAAGCTTGAATAGTGCAAAACAAAATTCAACCT  
GTCTTCTCTACACCAATGCAACACTGGACAGATGAGCAGAAAAGGAAGAATACTTCTCTTACACTGAGTGAA

TTGCTGGGCTTTGAAGACTTCCTTTCTTTAGATGTTTGGAGAGCCTCAGTGGGAGAACTGATTGGCACAGCAGTT  
CTTGTGTTTCATGCTTGACAGTATTGTGATATCAACCAATGAGACTGATATCAAAATGCCAAACCTTGTATTGTCA  
ATCCTTGCAGCCATTATTATTGCAATACTACTTCTTGCAGTGCATCCTATTTCTGGAGGCCACATCAACCCAGTT  
ATCTCCTTCTCGGCTGCCCTAGTCGGGTTGATCTCTATGTCGAAAGCCTTAATCTACATTATTGCACAATGTCTT  
GGAGCCGCGCTAGGTGCACTAGCTCTTAAAGCTGTGGTTAGTAGCACCATTGAACAAACCTTCTCACTTGGAGGC  
TGCACCCTGACAGTGATTGCCCTGGCCAGAATGGGCCCCGTTACAATCGGCCTCGAGACTGCCCAAGCCTTTTGG  
CTAGAAATAAATTTGTACCTTCGTACTCCTTTTTGCTTCAGTTTGGATGGCATATGATCATCGCCAAGCAAAGGCA  
TTAGGTCGTGTTCTTGTCTTTTTCAATTGTGGGAGTTGTGCTAGGTCTCTTAGTGTTTCATCTCCACCACAGTCACG  
GCCAAAAGGGCTACGCCGGGGCGGGGATGAACCCGGCTAGGTGTTTTGGTGCAGCAGTTGTTAGAGGTGGCCAC  
CTATGGAATGGACACTGGATTTTCTGGGTGGGCCCCGCCATTGCTTGCGTGGCCTTCTATTTGTACACGAAGATT  
ATTCCACGTCAGCNATTTTGTGAATAA

>OleurXIP1;3

MAGYDGHVNVEYDEESLNSANKIQPVFSTPMQHWTDQKRKKNSTLTLSELLGFEDFLSLDVWRASVGELIGTAV  
LVFMLDSIVISTNETDIKMPNLVLSILAAIIIAILLLVHPISGGHINPVISFSAALVGLISMSKALIYIIAQCL  
GAALGALALKAVVSSTIEQTFSLGGCTLTVIAPGQNGPVTIGLETAQAFWLEIICTFVLLFASVWMAYDHRQAKA  
LGRVLVFSIVGVVLGLLVFISTTVTAKKGYAGAGMNPARGFAAVVRGGHLWNHGWIFVWGPAAICVAFYLYTKI  
IPRQXFCE\*

## OleurNIP1;1 Oleur061Scf1489g00038.1

>Oleur061Scf1489:7790..10379 (+ strand) class=gene length=2590

>OleurNIP1;1

ATGGCTGAAATGTCCGGAGCAAATGGAGTGTCCCTGAGTATAAAGGATGATGTGAACGAGAAGAGCATTCAAGAT  
TCTCCAGACTGGTTGCCTTTTATACAGAAGGTACATACGAGGTTTCCTTTTCTTTTCGACAACCTTAATCCTCCC  
AACAGAACACAACTGATATCTTCTATGTCCATAATTATATGTTCAATCTTTTCTTGGAGAGACGATGAAATCGA  
TGCCCTCTTAATAAATGCTACAGTTAGTGGTTTATAAAGTACATAAGATTGTCCAACCAGGCAACAGTCTTTAGT  
AATCAATATTACGAAAATGATGTATAGCTGCTTAATTTGACACTGGTAATTAATGTTGAAAATCTGATTGGCCAA  
CTTATTTTGGTACTGTAGATAAATTGCAGAGATTTTGGGTACATACTTCTTGATTTTCGCCGGTTGTGCCGCGGTG  
GTGGTGAACGCCGACAAGGACAAGATTATAACCATGCCCGGAATCGCGATTGTGTGGGGACTTGTGGTCATGGTT  
ATGATTTACTCGGTTGGTCATATATCTGGTGCACATTTAATCCGGCTGTGACCATTGCTTTTGCTCCTGCAAG  
AGGTTCCCATTTGAGACAGTTAGGTACAGTACAGTTACATCGATCCTTATGTACCGAATATGCTCTTAATTTCTT  
TGTGTTTCGGTTGTGACTCCTAACACAGGTACCGGCATATATTTTCGGCTCAAATGATTGGAGCCACACTAGCAGCGG  
AACCTACGGTTATTGTTCCAAGGAAAACATGACCATTTCGGTGGAACATTTCCGACCGGCAGCGACATGACGATC  
TTTTGTGGTGAATTACATAATCACATTCTACCTCATGTTTCGTATATCTGGAGTTGCTACTGACAACCGAGCTGT  
AATTAGTCTAATTCCTTCACCAATTATTATTAAATAGTTATATTTCAGTACTACTGGTATCAAGCACCAGTTTAAAG  
TAGCAATTGTATGACATTACATGATAGATTTCATTTAAATGTATCGTCACATGATTCAATTAATTGAATCATCAA  
GTGTGGTTATTTAACTGATGTTATAGCACCAGTACTAGATAACATTATTCAATATTATTAAATCCAAAATTT  
TATTTATATTATATATCGTGTCTTACGACAATTCCTTCCAAAAGACAACATAGAGTTCTGTACTTTTGTTAATAA  
ATTCAAGAAACGGGATTAATAAGAAATCATGGTGATTTTTTTATAGTTAAAAATGGAGGAAGATAATGACATTTT  
TATTAAAGCTTATCCATGTTGACAATGATATGGCCCTTGTCGATAATTTCTTTTATGATTTTCTTTTATTCGGG  
TTGCCATGCAGATTGGAGAACTTGCGGGTTTAGCCATTGGAGCGACTATTTTACTTAATGTGATGATTGCAGGGT  
AAGTTCTATGCTCGATTATCTTGCTAATTTTCATAAAGATTGTATTTCAAATCATATCTTGGGAACATTTTCAT  
TTTGTGATCTATTTCAAATCTCTAAATCTTGCTTCGGTGTGATGATTCTACTTAAATTTCTAATAAGACAAATA  
TATTGGATTCAAACATAAATGATGCGATAGGAATTTCTGAAGAGTAAGATAAGCCGAAGCTCTTCTAAAATAACA  
GTACGAATAAGTTAATGACTTGAGTACAGTGTGTTTTGAGTTTGGATAATGTTATTTTGGTGCGGACACTATTGA  
TATTAAATTATATGTTTAAATTAATAACAATAAATTATGACTCATTTAATAGGATATGCTGACATATAAACTGGTG  
TTGAACACATAAATTGGTACTAGATACTATTATTCTTTAAGTTTATATTGAAATTTTATTTCAAAAATATCGATT  
ATGGACTTGATACTTGGTAGCTTTAATGGACAGGCCAGTATCTGGGGCTTCAATGAACCCAGCAAGGAGTTTGGG  
CCCAGCAATAGTGTCCAATAAATACAAGGGAATATGGATATACATAGTGGGCCCAACTCTTGGGGCTGTAGCAGG  
TGCTTGGGTCTACAATATCATCAGATTCACAAACAAGCCTTTAAGAGAAATCACCAAGAGTGCTTCTTTCCTCAA  
GAGCTCGGCCCCGAATGGGTCCAACAA

>OleurNIP1;1

ATGGCTGAAATGTCCGGAGCAAATGGAGTGTCCCTGAGTATAAAGGATGATGTGAACGAGAAGAGCATTCAAGAT  
TCTCCAGACTGGTTGCCTTTTATACAGAAGATAATTGCAGAGATTTTGGGTACATACTTCTTGATTTTCGCCGGT  
TGTGCCGCGGTGGTGGTGAACGCCGACAAGGACAAGATTATAACCATGCCCGGAATCGCGATTGTGTGGGGACTT  
GTGGTCAATGGTTATGTTTACTCGGTTGGTCATATCTGGTGCACATTTTAAATCCGGCTGTGACCATGCTTTT  
GCCTCCTGCAAGAGGTTCCCATTTGAGACAGGTACCGGCATATATTTTCGGCTCAAATGATTGGAGCCACACTGCA  
GGCGGAACCTACGGTTATTGTTCCAAGGAAAACATGACCATTTCGGTGGAACATTTCCGACCGGCAGCGACATG  
CAGTCTTTTGTGGTGAATTCATAATCACATTCTACCTCATGTTCAATTGGAGAACTTGCGGGTTTAGCCATTGGA  
GCGACTATTTTACTTAATGTGATGATTGCAGGGCCAGTATCTGGGGCTTCAATGAACCCAGCAAGGAGTTTGGGC  
CCAGCAATAGTGTCCAATAAATACAAGGGAATATGGATATACATAGTGGGCCCAACTCTTGGGGCTGTAGCAGGT

GCTTGGGTCTACAATATCATCAGATTCACAAACAAGCCTTTAAGAGAAATCACCAAGAGTGCTTCTTTCTCTCAAG  
AGCTCGGCCCGCAATGGGTCCAAC**TAA**

**>OleurNIP1;1**

MAEMSGANGVSLSIKDDVNEKSIQDSPDWLPFIQKIIAEILGTYFLIFAGCAAVVNVADKDKIITMPGIAIVWGL  
VVMVMIYSVGHISGAHFNPAVTIAFASCKRFPLRQVPAYISAQMIGATLAGGTLRLLFQGHDFGGTFPTGSDM  
QSFVVEFIITFYLMFIGELAGLAIGATILLNVMIAGPVS GASMNPARS LGPAIVSNKYKGIWIYIVGPTLGAVAG  
AWVYNIIRFTNKLREITKSASF LKSSARNGSN\*

**OleurNIP1;2 Oleur061Scf2586g05026.1**

>Oleur061Scf2586:547390..550593 (- strand) class=gene length=3204

**>OleurNIP1;2**

**ATG**GACGATATGTCTCGAGTCAGTTCCAACCGAGTAGTGTCCATTAACATAGAAGATGATGATTTCAATCAAAAC  
CCTCCTCCTCCTACATCCACTAACACCAGGAATTCTTCAGGCTGTTCTATTTCTGTATCTTTCTGTCAGGAGTGTG  
ATTCTGATTCTCCTACAAAAGTTTTTTTTATCTGTTATCTACTATTATTTTGTGCTAATATATATGTTATATGTA  
ATTTATTCCATGCTTACAGTTGATCGCAGAGTTTATTGGAACCTACTTCCTAATATTTGGTGGTTGCGCAGCCAT  
CACGGTGAACAAAACATGGAAGTGTAGTGACACTTCAGGAATAGCCGCCGTGTGCGGACTGGTGGTGGTGGT  
CATGATTTACTCCGTTGGACATATTTCTGGAGCACATTTGAATCCCGCTGTAACCATTTGCTTTTGCCACCTTCAA  
GAGGTTCCCGTGGAACAGGAAATATACATATATACGTTTATACTTGAATCTCCCTAATAGGTTTTAACAGTTGA  
AAACGCCGTTTCTCATCGCTTAAGCTTTAAGATGAGTAGGCTTGCCTTTGATGAAAAATCCAAGCTTCACATGCG  
GAGGCTTTGTCTCTCTATAAAAGCTTAAGCTTCTATATGAGGTGGTTCAACACATCTATATATTGTTTTGACA  
TGATCAAACGTGGGTTTTCTCATCGTGCAGGTACCAGCCTATGTCTGATCTCAAGCTCTTGCTTCAATTGTAGCC  
AGGCGCGGAGCCAGCACCCGGCGAGGGGGCGCGGCCGCGCTGGCTCTGCGGAGTCTGCAGAGCCGCGGG  
CAGTGTCAACAGTGGTGCAGCGGTGCTGAGAGAAGAAGAAGATGGAACCCGTTTCAATTTTTTTTTTTGGTGT  
TGGGCTTTTTTTTACAAAATGTTGGGCCTTTTATTATTTAGCCCAAATTCCAAACCCATTAGCCTGACCCATATTA  
ATACCCATTTCAATGATTTTCAATGCCCCTTTCTTTCAATTTCAGAATCGTGAAGGTGAATTCGTGACTTCGTTCAA  
TTCGTTGGCTGCGCGCTGGGACTGGGAGGGATCCTCTTCTAATCTTCTTCACTTTTCAATTTGTGGACCGGTTCA  
AAAAATTGCTGCAGTCTGCAGACTGCAGACCGAAACTCGAATCGATCGAAGACTCGCCTGCTCCAGCCTCCAGG  
CCTCCAGTGTCTGCTGAGTCTGCTGCGCCTGCTGCGGTGCTGCGGAGAGGCCCTAGTCACCCGACTCCGACTG  
CCGACTGGTAAGTGTAAAGTGTGGTAACTCTTTTTTTTTTTCCGGCCCTCTTTATTTTTTTTTTTTTTTGTTCTT  
TTATTGGTTTTGTTCTATTTTGATTTGGCTATTTTGATTTTGTGTAATTTTGTCTACTTGTAAATGTCTCAATT  
TATTGGAGTTTTGAGCTTTTCAATCATGTGTTCCCTCATACTGTACCTTTAATCAATTGTCAAAACCAATGAGAT  
TTAGCACTTAGCAGCAATGATTTTTAATAAGTTAAATTCTCTTTCTCTCATGCGTTTTACAAAATTATACGG  
AAATTTTACTTGTAGTTGCTAAATGTAGTCAAGGATTTTGTCTATAATTTTGACATCTACAAACCACTGGTC  
GTTTATAGAGTTGTAAAGGTAGTGTAGTAAGGTTAGAATGACCAATTTTGTAGTGTAGTCAAGCGTGCATGAAA  
TAGTTAAATTTTTCTTCGATTCTTGTATCAAAATTTACATATTTTGGCATTCTTTCTCATAAAAATTTTCTGC  
AACTATAATATTAATAAAATAACAATTACGAAGGTCAACCAGTCTAGTCCGATCGTCAACGGTCAACAGTCAACG  
GTCAACCCGCCCTAGCTGGACTTCGATCCTGGATTGCGCGCTGATTGTAGCTAGTGAACCCCTTCGACTATTATT  
TATGGGGAAACAAGATCACTTTTATTGGAACCCCTTTCGTCGGGATCGGATGTTCAATCCTTTATGATTGAGTTCAT  
TACCACATTTTACCTCATGTTTGTCTATTTCTGGTGTAGCCACAGATAATCGAGCTGTTAGTTCATCTTCTTCATC  
CATTATATTTTTTTTATTCATCCATGTTTAGATTTCTGATTGATTTAAATTTCTATTGTTAATTACTAATTGTCTCT  
ATCTAATAATAACAACATTCTTTGTCAACGATGCAGATTGGAGAAGTCAAAGGCATTGCCATTGGAGCTACTCTT  
TCACTTAACATACTTTTTCGCCGGGTACGGCTGATTAATTTAGATAATTGTCCCGTAGCTTAATTTTACACCAGAT  
TGATTCAAGTTCCGATGAATCAACTACTATGAATATTGAGTACGATGAGTTTTGATTAAATGAAGATGAATTTGA  
AAAAATAAATGTGTCAATTTTTTTTAAATATTGCATGTTTTTAGATGAGATAGTTTAAACAAACAATTTCTTGAATAC  
TTTCATCACACATTCGAATTTGATACACGATACTCGACATGATTGAAAAATATTAACCTCTAAGGCTTGTCTGAA  
ATGACAGGCCAATTTTCAAGGGCATCACTGAATCCAGCAAGGAGTTTGGGACCAGCAATTGTTTACAATCGCTACG  
AGGGTTTTGTGGAACACTACATTTCTGGCTCCTATTTCTGGAGCCATAGCAGGTGCTTGGGTCTATAATTTTATCAGAT  
TTACGGACAAGCCCTTGGCTGAAATTATCAAAAGGGGATCTTCCATTAGAAACGCAGCACGAACCAACTCTACTC  
AAGTATCAAGAAACAAAAGAGGATAAAATTTTGTATTATTA**TAA**

**>OleurNIP1;2**

**ATG**GACGATATGTCTCGAGTCAGTTCCAACCGAGTAGTGTCCATTAACATAGAAGATGATGATTTCAATCAAAAC  
CCTCCTCCTCCTACATCCACTAACACCAGGAATTCTTCAGGCTGTTCTATTTCTGTATCTTTCTGTCAGGAGTGTG  
ATCGCAGAGTTTATTGGAACCTACTTCCTAATATTTGGTGGTTGCGCAGCCATCACGGTGAACAAAACATGGAA  
AATGTAGTGACACTTCAGGAATAGCCGCCGTGTGCGGACTGGTGGTGGTGGTGCATGATTTACTCCGTTGGACAT  
ATTTCTGGAGCACATTTGAATCCCGCTGTAACCATTTGCTTTTGCCACCTTCAAGAGGTTCCCGTGGAACAGGTA  
CCAGCCTATGTCTGATCTCAAGCTCTTGCTTCAATTGTAGCCAGTGAACCCCTTCGACTATTATTTATGGGGAAA  
CAAGATCACTTTTATTGGAACCCCTTTCGTCGGGATCGGATGTTCAATCCTTTATGATTGAGTTCATTACCACATTT  
TACCTCATGTTTGTCTATTTCTGGTGTAGCCACAGATAATCGAGCTATTGGAGAAGTCAAAGGCATTGCCATTGGA

GCTACTCTTTCACTTAACATACTTTTCGCCGGGCCAATTTTCAGGGGCATCACTGAATCCAGCAAGGAGTTTGGGA  
CCAGCAATTGTTTACAATCGCTACGAGGGTTTGTGGAACCTACATTCTGGCTCCTATTTCTGGAGCCATAGCAGGT  
GCTTGGGTCTATAATTTTATCAGATTTACGGACAAGCCCTTGCGTGAAATTATCAAAAAGGGGATCTTCCATTAGA  
AACGCAGCACGAACCACTCTACTCAAGTATCAAGAAACAAAAGAGGATAAAATTTTGTATTATTA**TAA**

**>OleurNIP1;2**

MDDMSRVSSNRVVSINIEDDDFNQNPPTSTNTRNSSGCSISVSFVQKLIAEFIGTYFLIFGGCAAITVNKNME  
NVVTLPGIAAVCGLVVVVMIYSVGHISGAHLNPAVTIAFATFKRFPWKQVPAYVVSQALASIVASGTLRLLFMGK  
QDHFIGHTLSSGSDVQSFMIIEFITTFYLMFVISGVATDNRAIGELKGIAIGATLSLNLIFAGPISGASLNPARSLG  
PAIVYNRYEGLWNYILAPISGAIAWVYNFIRFTDKPLREIIKRGSSIRNAARTNSTQVSRNKKRIKFCLL\*

### **OleurNIP1;3 Oleur061Scf0038g03004.1**

**>Oleur061Scf0038:312314..314472 (- strand) class=gene length=2159**

**>OleurNIP1;3**

**ATG**CGCCGAAATGTCAGGAGCAAATGGATTGGTGGATGAGAAGCATATTCAAAATTCTCCAAACTGGTTACCCTTT  
ATACAGAAGGTATGTACATACGTACGTTGTGTTTTTTTTCTTTTTTTAAATTTTAAATTTTTTTTTTTATCTTG  
AAGACGATGAAGAAATCGATGCCTTCTTAATAAATGCTAGCTAGTAGGTTGTATAACTAACTGCTACTCGTAATT  
AATTATAACAATCTGATAGCTGATTATCTCAAAATATATGTAGTAATTGCAGAGGGTTTGGTACCTACTTCTT  
GATTTTTGCGGGTTGTGCGCAGTGGTGGTGAACGCCGATAAGGAGGAGGTGATAACCCAGCCGGAATCGCAAT  
AGTGTGGGGACTTGTGCTCATGGCTATGGTTTACTCAGTTGGCCATATTTCCGGTGCTCATTTTAAATCCGGCTGT  
GACCATTGCTTTTGCCACCTGCAAGAGGTTCCCACTTAGACAGGTGAAGATGGTATATTCAACAGAATTATATGT  
ACTGAACGAACGTGCTCTTGATTTCTTCGTGCTCATCTGATAGGTACCGGCATATATTGCGGCACAAGTGATCG  
GAGCCACGCTAGCAAGCGGTACCCTGAGATTACTGTTTCATGGGAAAACACGATCACTTTGCCGGAACACTTCCGA  
CCGGCTCCGACTTGCACTTTTTGTTATGGAATTTATAATCACGTTCTACCTAATGTTTGTATATCTGGAGTGG  
CTACAGACAACCGTGCTGTAATTCCTTCACCTTATTCTTGGTCTTTTCGAAAGACAACACAGAGTTATCTACTTCA  
TGTTTTATAAATTCAAGAAAACCGGATTAGCAAGAGATCATGGTGGTGATTTTATAAATTTGAAAGGGTTTAAGATA  
AATGACATCTTTTTGACAATGATACGGACCTTTTTTATCAATCATTGTATGACCTTTTTTTTTGTTTCGGGCTGCC  
ATGCAGATTGGGAACTTGCCGGTTTAGCCATTGGAGCAACTATTTTACTTAACGTGATGTTTGCAGG**GTATGTA**  
CTATGCTCAATTGTCTTGCTATTCTCTATATAAAGTTGCAGAACTGATCTTGTGCCCATGTGCTGGTTGAAGA  
TCAGCGGTGGATAATATATCTTATGTCCACTATGGGTAGGAGATCAGTTCTGTATAAAGATATTGTATTTCAAGA  
AAGTGATTTCAAAAGTGTCAGACCAAGCCATCAAGAAAAATAATAGACTTGTTTCGGATAGTCATAATCAATCT  
TGGAAGTTTTTTAAATTTGCAATCTGTTTTCGAATTTTCAAAAGTTTGTTTTTTTTTATGTTATAATTCCTCAATG  
TGAGGCTAACGGGTAGTTTTGATGGACAGGCCAATATCTGGGGCTTCAATGAACCCAGTAAGAGTTTAGGCCCA  
GCAATAGTGTCAAATCGGTACGAGGGAATATGGATATACATAGTAGGGCCGACTCTTGGGGCTATAGCGGGTGCT  
TGGGCCTATAATATCATCAGATTACAGACAAACCTTTACGAGAAATCACTAAGACTGCTTCTTCTCCTCAAGATC  
**TAG**

**>OleurNIP1;3**

**ATG**CGCCGAAATGTCAGGAGCAAATGGATTGGTGGATGAGAAGCATATTCAAAATTCTCCAAACTGGTTACCCTTT  
ATACAGAAGGTAATTGCAGAGGGTTTTGGTACCTACTTCTTGATTTTTTGCCGGTTGTGCCGCAGTGGTGGTGAAC  
GCCGATAAGGAGGAGGTGATAACCCAGCCGGAATCGCAATAGTGTGGGGACTTGTCGTCATGGCTATGGTTTAC  
TCAGTTGGCCATATTTCCGGTGCTCATTTTAATCCGGCTGTGACCATTGCTTTTGCCACCTGCAAGAGGTTCCTCA  
CTTAGACAGGTACCGGCATATATTGCCGCACAAGTGATCGGAGCCACGCTAGCAAGCGGTACCCTGAGATTACTG  
TTCATGGGAAAACACGATCACTTTGCCGGAACACTTCCGACCGGCTCCGACTTGCACTGTTTGTATGGAATTT  
ATAATCACGTTCTACCTAATGTTTGTATATCTGGAGTGGCTACAGACAACCGTGCTATTGGAGAAGTTGCCGGT  
TTAGCCATTGGAGCAACTATTTTACTTAACGTGATGTTTGCAGGGCCAATATCTGGGGCTTCAATGAACCCAGTA  
AGAAGTTTAGGCCAGCAATAGTGTCAAATCGGTACGAGGGAATATGGATATACATAGTAGGGCCGACTCTTGGG  
GCTATAGCGGGTGCTTGGGCCTATAATATCATCAGATTACAGACAAACCTTTACGAGAAATCACTAAGACTGCT  
TCTTCTCCTCAAGATC**TAG**

**>OleurNIP1;3**

MAEMSGANGLVDEKHIQNSPNWLPFIQKVIAEGFGTYFLIFAGCAAVVNNADKEEVITQPGIAIVWGLVVMAMVY  
SVGHISGAHFNPAVTIAFATCKRFPLRQVPAYIAAQVIGATLASGTLRLLFMGKHDHFAGTLPTGSDLQSFVMEF  
IITFYLMFVISGVATDNRAIGELAGLAIGATILLNVMFAGPISGASMNPVRS LGPAIVSNRYEGIIWYIVGPTLG  
AIAGAWAYNIIRFTDKPLREITKTASFLKI\*

### **OleurNIP1;4 Oleur061Scf7194g00006.1**

**>Oleur061Scf7194:25229..27368 (- strand) class=gene length=2140**

**>OleurNIP1;4**



**ATG**GCCGAAATGTCAGGAGCAAATGGATTGGTGGATGAGAAGCATATTCAAATTTCTCCAACTGGTTACCCCTTT  
ATACAGAAGGTATGTACATACGTACGTTGTGTTTTTTTTCTTTTTTTAAATTTTAAATTTTTTTTTTTAATC  
TTGAAGACGATGAAGAAATCGATGCCTTCTTAATAAATGCTAGCTAGTAAGTTGTATAACTAACTGCTACTCGTA  
ATTAATTATAACAAAATATATGTAGGTAATTGCAGAGGGTTTTGGTACCTACTTCTTGATTTTTGCCGGTTGTGC  
CGCAGTGGTGGTGAACGCCGATAAGGAGGAGGTGATAACCCAGCCGGAATCGCAATAGTGTGGGGACTTGTCTGT  
CATGGCTATGGTTTACTCAGTTGGCCATATTTCCGGTGCTCATTTTAATCCGGCTGTGACCATTGCTTTTGCCAC  
CTGCAAGAGGTTCCCACTTAGACAGGTGAAGATGGTATATTCAACAGAATTATATGTACTGAACGAACGTGCTCT  
TGATTTCTTCGTGCTCATCTGATAGGTACCGGCATATATTGCGGCACAAGTGATCGGAGCCACGCTAGCAAGCG  
GTACCCTGAGATTACTGTTTCATGGGAAAACACGATCACTTTGCCGGAACACTTCCGACCGGCTCCGACTTGCAGT  
CTTTTGTATGGAATTTATAATCACGTTCTACCTAATGTTTGTTCATATCTGGAGTAGCTACAGACAACCGTGCTG  
TAATTCCTTCACCTTATTCTTGGTCTTTTCGAAAGACAACATAGAGTTATCTACTTCATGTTTATAAATTCAGAA  
AACCGGATTAGCAAGAGATCATGGTGGTGATTTTCATAATTTGAAAGGGTTAAGATAAATGACATCTTTTGTACA  
ATGATACGGACCTTTTTTATCAATCATTGTATGACCCTTTTTTTTGTTCGGGCTGCCATGCAGATTGGAGAACTT  
GCCGGTTTTAGCCATTGGAGCAACTATTTTACTTAACGTGATGTTTGCAGGATATGTACTATGCTCAATTGTCTTG  
CTATTCCTCTATATAAAGTTGCAGAACTGATCTTGTGAACATGTCTGCTGGTTGAAGATCAGCGGTAGATAATATA  
TCTTATGTCCACTATAGGTAGGAGATCAGTTCTGTATAAAGATATTGTATTTCAAGAAAGTGATTTCAAAAATGT  
CAGACCAAGCCATCAAGAAAAATAAGACTTGTTCCGATAGTCATAATCATAATCTTGGGAAGTTTTTTAAAT  
TGCAATCTGTTTCGAATTTTCAAAGTTTGTTTTTTTATGTTATAATTCCTCAATGTGAGGCTAACGGGTAGTTT  
TGATGGACAGGCCAATATCTGGGGCTTCAATGAACCCAGTAAGAAGTTTAGGCCCAGCAATAGTGTCAAATCGGT  
ACGAGGGAATATGGATATACATAGTAGGCCGACTCTTGGGGCTATAGCGGGTGCTTGGGCCATAATATCATCA  
GATTCACAGACAAACCTTTACGAGAAATCACTAAGACTGCTTCTTTCTCAAGATCT**TAG**

>*OleurNIP1*;4

**ATG**GCCGAAATGTCAGGAGCAAATGGATTGGTGGATGAGAAGCATATTCAAATTTCTCCAACTGGTTACCCCTTT  
ATACAGAAGGTAAATGCAGAGGGTTTTGGTACCTACTTCTTGATTTTTGCCGGTTGTGCCGAGTGGTGGTGAAC  
GCCGATAAGGAGGAGGTGATAACCCAGCCGGAATCGCAATAGTGTGGGGACTTGTCTGTATGGCTATGGTTTAC  
TCAGTTGGCCATATTTCCGGTGCTCATTTTAATCCGGCTGTGACCATTGCTTTTGCCACCTGCAAGAGGTTCCCA  
CTTAGACAGGTGAAGATGGTACCGGCATATATTGCGGCACAAGTGATCGGAGCCACGCTAGCAAGCGGTACCCCTG  
AGATTACTGTTTCATGGGAAAACACGATCACTTTGCCGGAACACTTCCGACCGGCTCCGACTTGCAGTCTTTTGT  
ATGGAATTTATAATCACGTTCTACCTAATGTTTGTTCATATCTGGAGTAGCTACAGACAACCGTGCTATTGGAGAA  
CTTGCCGGTTTAGCCATTGGAGCAACTATTTTACTTAACGTGATGTTTGCAGGGCAATATCTGGGGCTTCAATG  
AACCAGTAAGAAGTTTAGGCCCAGCAATAGTGTCAAATCGGTACGAGGGAATATGGATATACATAGTAGGCCCG  
ACTCTTGGGGCTATAGCGGGTGCTTGGGCCATAATATCATCAGATTACAGACAAACCTTTACGAGAAATCACT  
AAGACTGCTTCTTTCTCAAGATCT**TAG**

>*OleurNIP1*;4

MAEMSGANGLVDEKHIQNSPNWLPFIQKVIAEGFGTYFLIFAGCAAVVNNADKEEVITQPGIAIVWGLVVMAMVY  
SVGHISGAHFNPAVTIAFATCKRFPLRQVKMPAYIAAQVIGATLASGTLRLLFMGKHDHFAGTLPTGSDLQSFV  
MEFIITFYLMFVISGVATDNRAIGELAGLAIGATILLNVMFAGPISGASMPVRSGLGPAIVSNRYEGIWIIYIVGP  
TLGAIAGAWAYNIIRFTDKPLREITKTASFLKI\*

## *OleurNIP3*;1 *Oleur061Scf1427g05001.1*

>*Oleur061Scf1427*:489963..491438 (+ strand) class=gene length=1476

>*OleurNIP3*;1

**ATG**GCAAAATTCACCTTCTATTATTAGCTTTTCTCTAAACAAAATTTACCAACAGACTTGTCCATTACAGAGGAA  
GCAAAGGGTTACTCCGCCGACGAATTCCTCCAAGAGATTCTGTTTCCCCGTCGTACTACCAGAAA**GTAAAGTTTT**  
**TAAACGATTGCATTTGACAATACAGTATACAAGATTTTAATGGATCATTTGTGCTTGAGTTAACAGATTATAGCA**  
GAGATTTTGGGCACTTATGTTCTTGTTTTTGCGGGTTGCGGTGCTGCTCTAGTTGATCGAGAGAAGACATTAACA  
GTTGTGGGTTTAGCAATGGTGTGGGGCTGGCTTTGATGGCAATGATATATGCACTTGGCCATGTTTCTGGTGGG  
CATTTCAACCCTGCAGTTACCATTGGCTTTGCAGCAGCTCGAAAAATTCACCTCGTTCAC**GTAAAGAATATCATT**  
**GTACACGAAATTTGGATTGTTTCAGTAGTATCCAATCATCTGTTTTGTAACATTGGAATCGTCTTGACAGTCCCGT**  
TGTACGTTTTATCGCAGTTTTTGGGTTCAACGCTAGCATGCCTCACCTGAAAGTACTATTCAATGACCAAGCTG  
ATATACTACCCACTCTCACTCATTATTCCAGTTCAACTACTGATCTTGAAGCGATTACATGGGAATTCGTCATCA  
CTTTCATTTTTATGCTCACCATACGTGGAGTAGCTTCTGATGACAGAGCA**GTATGTATTTCTCGTTGTGATACCT**  
**CTATATTTAGTTCCTGTCATGGTTTTATCTAAGCGTTATTGATACTTTTCAACCATCTTCTTTCATAATCTATAAC**  
**AGATCATCTCAATTACTGATTTTGAATTTTGTGATGAAATCAGAATAATGAAGTGGCTGGAGTTGCAATTGGA**  
**GCTACAGTGATATTTAATGCCCTTGTTCAGGGTAAGACTTCCCATCCACAAGCTTCATGCATGTTTGTCTAAG**  
**CTTAAAAGGTTAATAAATATATAAATTTTAAATAAATAATTTTTTGTGTTTATAAGGGAGATGAAAGTAAGA**  
**AAAAAGTAACATATTTTATCTTATTTGCATAAGCAGTAAACACAAAATGATCCCACCATTCTGCACTATTCTTCT**  
**CTTAATATGAAGTCTAGTAACGCTTTCATCATGTAATCGAAATTGCAACACAAGAAAAATAGAAAAAGATAAGGG**  
**AACCAGAATAAAGGGAGTTCTTAAATATACTTATATAGGTGAATTGAAAAAAATGCAGGCCTATTACTGGAGCT**  
TCTATGAATCCTGCAAGAAGCATGGGTCCAGCAATAGTTTCTGGAGTCTATAAAAATCAATGGGTGATGTTGTT

GCTCCCATTCTTGGAGCCATAGCTGCAAGCCTGATATACAGTCTTCTCCAGCCATGGAAGCCGAAAAAGCATAGA  
GAGAGTGCTAGAAGTACATACAATGATCTATATCTACGTCCCCGAGGTA**TGA**

**>OleurNIP3;1**

**ATG**GCAAATTCACCTTCTATTATTAGCTTTTCCTCTAAACAAAATTTACCAACAGACTTGTCCATTACAGAGGAA  
GCAAAGGGTTACTCCGCCGACGAATTCCCTCCAAGAGATTCTGTTTCCCCGTCGTACTACCAGAAAATTATAGCA  
GAGATTTTGGGCACTTATGTTCTTGTGTTTTGCGGGTTGCGGTGCTGCTCTAGTTGATCGAGAGAAGACATTAACA  
GTTGTGGGTTTtagCAATGGTGTGGGGGCTGGCTTTGATGGCAATGATATATGCACTTGGCCATGTTTCTGGTGGG  
CATTTCAACCCTGCAGTTACCATTGGCTTTGCAGCAGCTCGAAAAATTCCTACTCGTTCACGTCCCGTTGTACGTT  
TTATCGCAGTTTTTGGGTTCAACGCTAGCATGCCTCACCTGAAAGTACTATTCAATGACCAAGCTGATATACTA  
CCCACTCTCACTCATTATTCCAGTTCAACTACTGATCTTGAAGCGATTACATGGGAATTCGTCATCACTTTCATT  
TTTATGCTCACCATACGTGGAGTAGCTTCTGATGACAGAGCATTGCAATTGGAGCTACAGCCTATTACTGGAGCT  
TCTATGAATCCTGCAAGAAGCATGGGTCCAGCAATAGTTTCTGGAGTCTATAAAAAATCAATGGGTGTATGTTGTT  
GCTCCCATTCTTGGAGCCATAGCTGCAAGCCTGATATACAGTCTTCTCCAGCCATGGAAGCCGAAAAAGCATAGA  
GAGAGTGCTAGAAGTACATACAATGATCTATATCTACGTCCCCGAGGTA**TGA**

**>OleurNIP3;1**

MANSPSIIISFSSKQNLPTDLSITEEAKGYSADFFPRDSVSPSYQKIIAEILGTYVLVFAGCGAALVDREKTLT  
VVGGLAMVWGLALMAMIYALGHVSGGHFNPAVTIGFAARKIPLVHVPLYVLSQFLGSTLACLTLKVLFNDAQDIL  
PTLTHYSSSTTDLEAITWEFVITFIFMLTIRGVASDDRALQLELPITGASMNPARSMGPAIVSGVYKNQWVYV  
APILGAIAASLIYSLLOPWKPEKHRESARSTYNDLYLRPEV\*

## **OleurNIP4;1a Oleur061Scf7805g00013.1**

>Oleur061Scf7805:30162..32022 (+ strand) class=gene length=1861

**>OleurNIP4;1a**

**ATG**GCAATCGAAGAAATGGAAGAAGGAGTAGAAACCTCAACGTTCAATGCTAAAGAAGGCTTCTGTATGTCGGCT  
TCAATCGTAACATATCGTACAAAAGGTTAGATCTCGTAACATTTCACTTGAAAACCTTTTGGTACGATTCTCTACAA  
TCTTCGATTTTTTCATATTTATGCATAACATGTCACTTTCAATCTTGTTCGGTTCGAGCATGCAAAAAATGTACTA  
AACGTAATGTGTTAGATGTTTCCCAGGTGATTGCAGAGGTGATTGGCACGATTTTTGTTATATTTTCGGGGTGTG  
GCTCTGTTGCGGTGAATAAATTGTATGGTGGGACGGTCACATTCCCAGGCATTTGTGCGACATGGGGACTAATTG  
TGATGGTCATGGTCTACTCCGTAGGTCACATATCCGGGGCTCATTTTAACCCTGCGGTCACCATTACCTTCGCCA  
TCTTTTCGCGGTTTTCCATGGAAAGAGGTACCGATTAATACAACAGACATGTTTAAATATGTTAGATTCGATTCAG  
TACATACATACACGTATGGGCAATTATGATGGTTTTAAGTAAAACGGGATGAGAATTGATAAGTTTGAAATGTGAT  
AATATCGTGCAAGAAATTCGTGGGTTTTTGTATCATTTATTATGTTCCATATTGCATATTAAACAAAAAGATGT  
ATTGTTTTGTATTGATAATTTAAATCATAGTTATTAAACACGGATTGAACTGATTTTCTTTTAACTGTGCAACT  
CGAATCATCGTAGATACAGTAATGTTCCAAGATTTGCAGGTTCCATTGTATATAATAGCGCAATTGATTGGATCG  
ATCCTTGCGAGTTGTACTTTGGCTATCTTGTGTTGACATCACCTCTGAAGCTTACTTTGGCACCTTGCCCGTTGGA  
TCAAATGGGCAATCTTTGCCCATAGAAATCATCATCTCCTTCCTCTTGATGTTTACCATTCTGCGCGTAGCAACA  
GATAGTAGAGCGGTATGTAACATCAAAAAACATACATGACGTATTGGTAAAATGACTTAATTTTATTATTTAGAT  
GCTCTAAATTTTCACTTCTGAACGAGCTGCCCGCGTAATTTTCTGCTTGCTTAACCTAATTTGTTTATTTATTT  
TCCTTTTGAACATAGATTGGAGATCTTGCCGGTTTTAGTCGTTGGGATGACTATAATGTTAAATGTGTTTCGTTGC  
CGGTACGTTAATGTCTCAATCCTGTGTTTTGTTACGGGATTGGACAATATAAAAAATAATAATTATAATAATAA  
AATCAACAATATTTTATTTTAAATTTTCTATTTCGATCTGCAGCCGATTCTGGAGCCTCAATGAACCCAGCAAG  
GAGCATAGGCCAGCCATTGTGAAGCATACTTATAAAGGACTCTGGGTTTATATATTTGGCCCACTTATTGGGAC  
CATACTTGGAGATTTTGCTTATAAATTTGATTAGATATACGAATAAACCCCTTCGTGAATTAATAAAAGTAGTTT  
ATTAATCAGAAGCATATCCAAAAATAATACAACCT**TAG**

**>OleurNIP4;1a**

**ATG**GCAATCGAAGAAATGGAAGAAGGAGTAGAAACCTCAACGTTCAATGCTAAAGAAGGCTTCTGTATGTCGGCT  
TCAATCGTAACATATCGTACAAAAGGTGATTGCAGAGGTGATTGGCACGATTTTTGTTATATTTTCGGGGTGTGGC  
TCTGTTGCGGTGAATAAATTGTATGGTGGGACGGTCACATTCCCAGGCATTTGTGCGACATGGGGACTAATTGTG  
ATGGTCATGGTCTACTCCGTAGGTCACATATCCGGGGCTCATTTTAACCCTGCGGTCACCATTACCTTCGCCATC  
TTTCGCCGTTTTCCATGGAAAGAGGTTCCATTGTATATAATAGCGCAATTGATTGGATCGATCCTTGCGAGTTGT  
ACTTTGGCTATCTTGTGTTGACATCACCTCTGAAGCTTACTTTGGCACCTTGCCCGTTGGATCAAATGGGCAATCT  
TTCGCCATAGAAATCATCATCTCCTTCCTCTTGATGTTTACCATTCTGGCGTAGCAACAGATAGTAGAGCGATT  
GGAGATCTTGCCGGTTTTAGTCGTTGGGATGACTATAATGTTAAATGTGTTTCGTTGCCGGGCCGATTCTGGAGCC  
TCAATGAACCCAGCAAGGAGCATAGGCCAGCCATTGTGAAGCATACTTATAAAGGACTCTGGGTTTATATATTT  
GGCCCACTTATTGGGACCATACTTGGAGGATTTGCTTATAAATTTGATTAGATATACGAATAAACCCCTTCGTGAA  
TTAACTAAAAGTAGTTTCAATTAATCAGAAGCATATCCAAAAATAATACAACCT**TAG**

**>OleurNIP4;1a**

MAIEEMEEGVETSTFNAKEGFCMSASIVTIVQKVIAEVIQTYFVIFSGCGSVAVNKLYGGTVTFPGICATWGLIV  
MVMVYSVGHISGAHFNPAVTITFAIFRRFPWKEVPLYIIAQILIGSILASCTLAIFDITSEAYFGTLPVGSNGQS

FAIEIIISFLLMFTISGVATDSRAIGDLAGLVVGMTIMLNVFVAGPISGASMNPARSIGPAIVKHTYKGLWVYIF  
GPLIGTILGGFAYNLIRYTNKPLRELTkSSSLIRSISKNNTT\*

### **OleurNIP4;1b Oleur061Scf3669g01008.1**

>Oleur061Scf3669:165510..167403 (+ strand) class=gene length=1894

>OleurNIP4;1b

**ATG**GCAATCGAAGAAATGGAAGAAGGAGTAGACAACCTCAACGTTCAATGCTAAAGAAGGCTTCTGTATGTCGGCT  
TCAATCGTAACTATCGTACAAAAGGTTAGATCTCGTAACATTTCACTTGAAAACTTTTGGTACGATTCTCTACAA  
TCTTCGATTTTTTCATATTAATGCATAACATGTCACATTTCAATCTTGTTCACTCGAGCATGCAAAAAATGTACTA  
AACGTAATGTGTTAGATGTTTCCCAGGTGATTGCAGAGGTGATTGGCACGTATTTTGTATATTTTCGGGCTGTG  
GCTCTGTTGCGGTGAATAAATTGTATGGTGGGACGGTCACATTCCCAGGCATTTGTGCGACATGGGGACTAATTG  
TGATGGTCATGGTCTACTCTGTAGGTCACATATCCGGGGCTCATTTTAACCCTGCGGTCACCATTACCTTCGCCA  
TTTTTCGTCGTTTTCCATGGAAAGAGGTACCAATTAATACTACAGACATGTTTAATATGTTAGACCGATTTCATA  
TATATATGGACAGGCATGAACAATTATGATAGTATAAAATAAACGGGATGAGAATTGACAAGTTTGAAATGTGAT  
CATATCGTGTAAGACATTCGTGGGTTTTTCGTTCATCATTATGTTCCATATGTTGAATTTGCACTAAATATTT  
TATTGGATTTCATGTTGCATATTAAGAAAGCATTGTTGTCTATTGATAATTTAAATCATAGTTATTTAA  
CTCGGATTGAATTGATTTTCTTTTCACTATGCAATTCGAATCATCGTAGATACAGTAATGTTCCAAGATTTCGA  
GGTTCATTGTATATAATAGCGCAATTAATTGGATCGATCCTTGCGAGTTGTACTTTGGCTATCTTGTGTGACAT  
CACCTCTGAAGCTTACTTTGGCACCTTGCCCGTTGGATCAAATGGGCAATCCTTCGCCATAGAAATCATCATCTC  
CTTCCTCTTGATGTTTACCATTCTGGCGTAGCAACAGATAGTAGAGCGGTATGTAACATCAAAAAACATACATG  
ACATATTGGTAAATGACTTAATTTTATTATTAGATGCTCTAAATTTTCATACTTCTGAACGAGCTGCCCGCGTA  
ATTTTCTGCTTGCTTAACCTAATTTGTTTATTTATTTTCTTTTGAACATAGATTGGAGATCTTGCCGGTTTAG  
TCGTTGGGATGACTATAATGTTAAATGTGTTGCTTGCCGGTACGTTAATGTCTCAATACTGTGTTTTGTACGA  
GATTGGACAATATAAAAAATAATAATTATAATAATAAATCAACAATATTTTATTTTAAATTTCTATTCAATCT  
GCAGGCCGATTTCTGGAGCCTCAATGAACCCAGCAAGGAGCATAGGCCAGCCATTGTGAAGCATACTTATAAAG  
GACTCTGGGTTTATATATTTGGCCACTTATTGGGACCATACTTGGAGGATTTGCTTATAATTTGATTAGATTTA  
CGAATAAACCCCTTCGTGAATTAATACTAAAGTAGTTTCAATTAATCAGAAGCATATCCAAAAATAATACAAC**TAG**

>OleurNIP4;1b

**ATG**GCAATCGAAGAAATGGAAGAAGGAGTAGACAACCTCAACGTTCAATGCTAAAGAAGGCTTCTGTATGTCGGCT  
TCAATCGTAACTATCGTACAAAAGGTGATTGCAGAGGTGATTGGCACGTATTTTGTATATTTTCGGGCTGTGGC  
TCTGTTGCGGTGAATAAATTGTATGGTGGGACGGTCACATTCCCAGGCATTTGTGCGACATGGGGACTAATTGTG  
ATGGTCACTGGTCTACTCTGTAGGTCACATATCCGGGGCTCATTTTAACCCTGCGGTCACCATACCTTCGCCATT  
TTTTCGTCGTTTTTCATGGAAAGAGGTTCCATTGTATATAATAGCGCAATTAATTGGATCGATCCTTGCGAGTTGT  
ACTTTGGCTATCTTGTGTGACATCACCTCTGAAGCTTACTTTGGCACCTTGCCCGTTGGATCAAATGGGCAATCT  
TTCGCCATAGAAATCATCATCTCCTTCCTCTTGATGTTTACCATTCTTGCGTAGCAACAGATAGTAGAGCGATT  
GGAGATCTTGCCGGTTTAGTCGTTGGGATGACTATAATGTTAAATGTGTTGCTTGCCGGGCCGATTCTGGAGCC  
TCAATGAACCCAGCAAGGAGCATAGGCCAGCCATTGTGAAGCATACTTATAAAGGACTCTGGGTTTATATATTT  
GGCCCACTTATTGGGACCATACTTGGAGGATTTGCTTATAATTTGATTAGATTTACGAATAAACCCCTTCGTGAA  
TTAACTAAAGTAGTTTCAATTAATCAGAAGCATATCCAAAAATAATACAAC**TAG**

>OleurNIP4;1b

MAIEEMEEGVNDSNFNAKEGFCMSASIVTIVQKVIAEVIQTYFVIFSGCGSVAVNKLYGGTVTFPGICATWGLIV  
MVMVYSVGHISGAHFNPAVTITFAIFRRFPWKEVPLYIIAQLIGSILASCTLAIFDITSEAYFGTLPVGSNGQS  
FAIEIIISFLLMFTISGVATDSRAIGDLAGLVVGMTIMLNVFVAGPISGASMNPARSIGPAIVKHTYKGLWVYIF  
GPLIGTILGGFAYNLIRFTNKPLRELTkSSSLIRSISKNNTT\*

### **OleurNIP5;1a Oleur061Scf0098g04035.1**

>Oleur061Scf0098:449548..**462237** (- strand) class=gene length=1803

>OleurNIP5;1a

**ATG**CCGGAATTTCGAAGTCGAAACTCTGACAATGTCGGCGCCAGCGACGCCTGGAACGCCGGCGCCACTGATTTCT  
TCTCTGCGAATAGACTCAGTTTCTTACGATCGGAAGTCAATGCCACGATGCAAGTGCCAGTTGATGCACCC  
ACTTGGGGTGCACCACATACGTGCAGCCTCACCGATTTCTCTGTGCCTGACATCTCTCTTACTCGCAAG**GTTAGA**  
**CTTT**ACACTCTCTCTCTCTCTCTCTCTCTCTCTCTCTGTCTCTCACACACAATATAATATGAATATATATTTTGT  
TTAAATTTATTATGTGGAGTGAGTGGGGTCCCTAACCTTTTCACTTGCCCTTTCAAATTTTCTGTATTGAACAATGA  
TGAGTCGGTTGAATGAATTTATATTGAGTTTGTACTCAACAGGAGCTGTCACGGCCCTGTCACACTAGCATA  
ACTCTTTTATAATCAGCGGAATATTATGTCGTTTCTATATCATCTGTCGACATTCTATCATTTCTTTTACAAATTTAA  
CACTCTTTCAGCGTGGTGAGTGATAAATCATACATAGCATTTATGTAACATATGTTGTGAACATATGTTGTAGTATCAAT  
AATTAATTAATTTTTTTTTTTTTTTTTTTTTTGTCAAAATGTTGTGAAACCTGAAACCAATTAATGAATTAATGATT  
CAATTGAAACAAATTAAGTTAACTAACCCAATTGAACAATAATTGAAATTTGATTGCCCAATTGAGAATCTGA

GATGATGTGAAAGTTTAAATCACAAATAATACGAAGTCATGGTCATACAAGACAAAAAATGTGTGCTACAATTC  
ATATGTAGTCGCATTGCCACATTTTATAGGTCATAAACTAATTATTAGTCACAAATCATCCAATAACTGGCTAC  
AAAACATTCAATTAATTGTTTACAAATACTATTACATCATCCCACTCCACATCATCCTATCCCATCGCTTCTCT  
CTAATTTAGGGATATCAACAAGTCGGGTCGGATTAGGACAACCTATTCTCTTCTCTCGTCTTGTGAGTAGTTTTA  
TTACCTTACCCCATCTCCATACACAGTTAAGGCGAGGTTGGACAAGCTGGCTCCTTGTCTATTTATATTTTATT  
TTTTTCATATCTTTAATTGGTAAATATTATTATCATTATTTATTTTTTCAATTTGTTAATAACACCCATGTTTC  
CTCTAAAAACGATGATGATATTTTTCTTTTTACATGATAAAAGTTTAAATTTGAAATGAATTTTAGACAAGCAGG  
ATTTATGTTCCCCAAACCAACTCGGGGCAATGACCCCTCACTTGTCCCCCACCTCATGTACTAAGCCCCGTTTGAT  
TATCGTTCTTTGGTCACAAAAATAAAAAATATAATCGCTATTTATTGTATTAAAGTTACTATATTTGACTTTTTTAT  
CTTTTGGATAGTTTTTATTATCATTCTTACAAAAATAATACCAAATGGGACCTAAGTAGGGAACCTCCATGCATT  
TGGGGCGAGGTCCAAGCGTATAAGCTTTTTTGGCATCCTTAATCTCATTCTTCACCCGCTTCTCTCGGAACTA  
CCACCGGCAGCCACTGAGTTTTTTTTCTCACCACGGTCGACAATCACAGAAAAATAAGTCTACAATTACCGGCAA  
CAACCATAGAAAAACAGATATCCAGTCAATCACAACTCCACCTCATAGTGACGACGCTACCACAACATATAGAAA  
GACAGATCTACAGCCACATCACAAACCCACCTCATCGCGGTGGCGCCACCAACATCATCCCGCCATTTACCCCT  
TTCCACAACGTCTCTTCCATTTTTTTTTTTCGCATCTGCATTCTACACAACCTGACGGCACAGACACAAAAATCACC  
ACCAACCACGTTGATAGAGTAGGAACCTGCACGGGCGCTGTGATCTAAAAGTCAACACCACGGAAGACGGAGCG  
GCAGAAATGAGTAAATATGTGAAATTTTAGGATTAGAGTTTAGTTATTTGGGATAAGAGGAGTAAATCTGTGACG  
AATTTAGGGGGCAAAATGGGAACTAAAGAGTTTAGAGAAGATAGTGGTGGCACTTGAAGATGGCCATAGCTTTT  
TCCACAATTAGCCCTTGTGTTGAGCCATATTATTTCTTTTGAATATGCATTTTGAATAATGTATTGATGAAAAATG  
TGTGGTTAAAAAATAAAATAAAGTTTTGAATTTGCATGTAATATTATTTTATTGAAAAATGTGCGATTGAAATGA  
TATTAATCACTATTTAAGAATATATATTTTTTTTTTAAATGTGGCTCAAACATACCTTGACACCGTCTGCATAG  
AAATCCGTTATAAATGTGAGTAGGTGAGGGCAATATGTATTTGTTAATGGAGGAGAATATTGGAGTTAAAAAATC  
AAATTGTGCAGTTTTGAAGTTCTATAATGATTTATGCAAGGATTAAGATGTTTTTATCCGAGGGGGTAATCGAAC  
TGTGTCTCTCCCTTCACAAACATGCAGGCCCGCCCTTATTAAATAATTCAAGCCGTGGTTCCACCTCATGTTG  
TGTGTAGTAGGTAAGAGTTATATAGATGATTATGTACGTGTAGTATGACCTTTATTTAGGATTAGAATTTAGT  
TATTTGGGCTAAGAGGAGTAAATCGTGAGCTCACGAGCCACGAGCTGCTCGCGAACTCGTCACTCCACATCATCC  
TATCCCATCGCTTCTCTCTAATTTAGGGATATCAACAAGTCGGGTGCGATTAGGACAACCTATTCTCTTCTCTCGT  
CTTGTGAGTAGTTTTATTACCTTACCCCATCTCCATACACAGTTAAGGCGAGGTTGGACAAGCTGGCTCCTTGT  
CCTATTTATATTTTATTTTTTTCATATCTTTAATTGGTAAATATTATTATCATTATTTATTTTTTCAATTTGTT  
AATAACACCCATGTTTCTCTAAAAACGATGATGATATTTTTCTTTTTACATGATAAAAGTTTAAATTTGAAATG  
AATTTAGACAAGCAGGATTTATGTTCCCCAACCAACTCGGGGCAATGACCCCTCACTTGTCCCCACCTCATGT  
ACTAAGCCCCGTTTGATTATCGTTCTTTGGTCACAAAAATAAAAAATATAATCGTATTTATTGTATTAAAGTTAC  
TATATTTGACTTTTTTATCTTTTGGATAGTTTTTATTATCATTCTTACAAAAATAATACCAAATGGGACCTAAGTA  
GGGAACCTCCATGCATTTGGGGCGAGGTCCAAGCGTATAAGCTTTTTTGGCATCCTTAATCTCATTCTTCACCCG  
CTTTCTCTCGGAACTACCACCGGCAGCCACTGAGTTTTTTTTCTCACCACGGTCGACAATCACAGAAAAATAAG  
TCTACAATTACCGGCAACAACCATAGAAAAACAGATATCCAGTCAATCACAACTCCACCTCATAGTGACGACGC  
TACCACAACATATAGAAAGACAGATCTACAGCCACATCACAAACCCACCTCATCGCGGTGGCGCCACCAACATCA  
TCCCGCCATTTACCCCTTTCCACAACGTCTCTTCCATTTTTTTTTTTTCGCATCTGCATTCTACACAACCTGACGGC  
ACAGACACAAAATCACCACCAACCACGTTGATAGAGTAGGAACCTGCACGGGCGCTGTGATCTAAAAGTCAACA  
CCACGGAAGACGGAGCGGCAGAAATGAGTAAATATGTGAAATTTTAGGATTAGAGTTTAGTTATTTGGGATAAGA  
GGAGTAAATCTGTGACGAATTTAGGGGGCAAAATGGGAACTAAAGAGTTTAGAGAAGATAGTGGTGGCACTTGA  
AGATGGCCATAGCTTTTTCCACAATTAGCCCTTGTGTTGAGCCATATTATTTTCTTTAGAATGCATTTTGAATAA  
TGTATTGATGAAAAATGTGTGGTTAAAAAATAAAATAAAGTTTTGAATTTGCATGTAATATTATTTTATTGAAAA  
ATGTGCGATTGAAATGATATAAATCACTATTTAAGAATATATATTTTTTTTTTAAATGTGGCTCAAACATACCTT  
GACACCGTCTGCATAGAAATCCGTTATAAATGTGAGTAGGTGAGGGCAATATGTATTTGTTAATGGAGGAGAAAT  
ATTGGAGTTAAAAAATCAAATTGTGCAGTTTTGAAGTTCTATAATGATTTATGCAAGGATTAAGATGTTTTTATC  
CGAGGGGGTAATCGAACTGTGTCTCTCCCTTCACAAACATGCAGGCCCGCCCTTATTAAATAATTCAAGCCGTG  
GTTCCACCTCATGTTGTGTGTAGTAGGTAAAAGGTTATATAGATGATTATGTACGTGTAGTATGACCTTTATT  
TAGGATTAGAATTTAGTTATTTGGGCTAAGAGGAGTAAATCGTGAGCTCACGAGCCACGAGCTGCTCGGAACTC  
GTGATTTTTATTTTTTTATTTTTTTTTTACATTTGTGGACCTTTTTTTTATAATTTTTTTCATATTTTTTTATGAGC  
CCACGAGCTCAGCTCAAGCTTGTGGGATTGAGCCCCCTGCTCAACTCGTGCTCAGGCTCGGGCTCGTTTTATCCC  
ACGAGCTGGGTTTTGACTAGCCGAGCGTTTCGAGCCGCTCGGCATGTTTGACATCCCTACCTCTATTCAATAAGTG  
GCATAATGGTTGGGCTAGGAAGTGGGGTCTAATGGAGAAAATCTTCGGTGAGGTGATCGTATTAGCGCATGTGGA  
ATGTCCACCCTAACATAGAACGGCAGGTGTACAATTTTAAAGTGGGTTGGTAAATTTTGTCTGTCTTACTTTTT  
CTGATTTTTCTTTTTTTTATTTTATTTTTTTGAAAAGGGCTAGAAACCACCCCTCGTTAAACTGGAGTAACAGAGA  
AGTTGTCTTGAACAAAATAGTAATAGCACTCTTAATATACAGTAATGTCAAAGCAAAAACACCTTCATTAAAGAA  
AACGATATTTAATATTGTCTAAAAATCGGAATAGTGTAATTTCAATTTATCCATTGAAATTTAGCAAAATTACACA  
TAAGCGTCTTTTTATCTTCTACCATAACTTCAATCAATTGAAAAATGTAAACAACTAATAAATGAAAGGAAAAAT  
TGCGACAGTGGTCCCCTAACCTTTCACTTTTTTGCAAACTTTACTCAAACATTCAATTTGTGATAGCGAAGATCT  
CCAACCTTTCAAAAATGTAGAGCAAAGGTCCAAATGGACGGTTTTTCGATTTTTTCATCCATTTGACTATTAGTTGA  
CCAAAAACAATAAATTTTGACCAATTTTGACTAAATAAAAAAGGGTGAAATAGTAACCTGATAATTACCATATTA  
ATAAATGAACAAAAAACTAGGGAAAATAAAAAAACCAAAAAAATTAAAAAAAAAAAAAAAAAAGAAATAAAAAATTG  
TTGTCTCTCCAGCGCCCTGCCCCACTCCACTTTACTCCGTCTCACCATCTCTACGTATCCCAACCTCCTTCCC

TTCGAAATCAGCCACCAGCACTGCCACCTATCGTTCGATAACATCGCCAAAAAATCAATAACACGCCCTGCTGGCA  
ACATCTCCTTCTCACACCCATCACCAAAAATCCAATATATATATACCCATACTCCTTATACTTAATCAATTTTTTATA  
ATGCCTGTTTATAAAAATTATATTAGAAAATTGAACAAATTTCTCCCAAACCTCAAGATCTTTCAACAATCGTTTAT  
TGCCTAGATCTGCAATAAGCAATAATAAAAGGCGTCAGCTGAGATTAAAAACTTGCCATTTTCTTCCATTTCCCTT  
CGTGAATAAAAATCAGCCTCAAAACTAGAACGGTGTTTTCTGTGATTTCCAACCTTAAAAATCTTAACAATCAACA  
GATCAATTTAAAAAAATGTTGAGGTGGGGTTTTTGTGTTTTGGGTGTAGGTTTGATGGTAATGGTGGTGTGTCACC  
ATGCAACTCTTACTCAATGGTTGGGTGGGGTTTTTGGTTTTAGTTTTGATAGTAGTAGTGGCAGTTTGTGTTTTGGG  
TAACTGTAGCTGATCGACAGGATGTGGTAAGTGGGGTGGCTCTAGCTATTGACATTGCTAGTTACTGTGGGGATG  
GGGCTGGGGCTGGGGTGTGTTGGAGGAGATAACATTTTTTCTATTTTTTGGTTTTTTTTTCTTGATTTTTTTGTTC  
TTTAATAATATGGTAATTATCAAGTTACCATTTTACCATTTTTAAATTGGTCAAATTTATTTTTCTTTGTCAGTT  
AACGGTCTAAGGATGGAACCGTACATTTGGACCTCTGCTATAATTTTTGAAAGATAAGGGACATTTCCTAGTAC  
AAATTGAAGTTTAGGGTAAAGCCCGTAAAAAGTGAAATGTTAGAGACTGCTACTGCAATTTTCTCAAATAAAAA  
TTTACAATCCAAATTAATTTGTACAAAACCTTAGAACTTCATCAAACGCATTTTATTTAATAAAGCTCATACCAGT  
GTTATATCAAAATTTTAGCTATGATGTCATTAATCTTTTCTTTGCTGATCATCAAACCTATAATAATAATAATA  
TAATGAGAAAAAATCTTAGTCAAGTAATCATATCGTTGTGGTCTTGAAGCATGTTTGGAAGGTGAAAAATTTGAA  
CACCCGAGAGCTAAGTGATGAATAAACAAATTAAGATAGTTTCATGTAGGCCAAAAATATTGGGTAAGGTGTGCCA  
CCATTATTTTAATGACATTCTTCGTTTACTGTAAGCTGATCATCGTAAATGATAATAACTGTTATATTATTTAAG  
AATTGAGTAAGGGTAATCATTGAGGTAAAAAATAATATCATATTTTGACTTTGCTAAAACATTGAAGCAAAG  
TTAAATATGATAATTTTATTTTACCCTTTTTTAGCAAGGTAAAAATGTTTTAGCAAAGTTTGTCCATCTCTTAC  
TTCAATCATTTCCCCCTTTTTCTCTTTGCAAATAATTCTCATGTTTTTTTTTGGTAAATCCAACATTTTAACTCTT  
CACCAACCGCATTTGTGAAATAAAATTATGATTTTTTTTTTGTGCATATAATGGCATTAAACCATGCAATTAACGACA  
TCTGCTTAAGCATTAGACACTTTACGTCTTGATTTGGGAAATTGTCTTTCTTCAGGTCTAGCAAGTTCATGGTTA  
TGATGAGTATTGATATGAGAAATTATCCATATTCCACCGCTAACTGCAAAACGCACCTTAAATTTGCAACCTATT  
CTTGCTCTCTAATCTATTATATTTTCTTCACATCAAGTTACTCTCCATCCCTTCGAGACCTTTCAATTTGAACATAAA  
AATTCTCGTCGTTTAATATTTTTTATGCAACTCTTCGAATATGCCCTTTGCGAATACTAAAACCTTTTTCTTATAG  
CATATGAATTACATATACTATAAGCTTCTTCATCAAACATACTTACACGTTGCGTTTGTACCCAAATTAGGGTG  
AATTTTTTTTTAGAAATAAACTATTTTCTTATTTCCATGTGGAAATATTTGTTTCTTATATTTTACGTTGATTTTT  
ATGAAAATATATTATTTTCTTATTTCCACATTATTTACATCTTTATGCGATGACATGTACCTATAAAATACTGATCT  
TCTCTTTTCACTTTTATTCAAACAAGAATTGTTAAGTTCTTGTATTTCTTCCCATATTGTGCGATTAATAAAAAACG  
TCGTGCTTTTGTGATTAACCTCTCTTTGTTAATTTCTGTACTTTTAAATCTTGTCTTCTCGTTGCAATCTTCATTAC  
TTCATATCGCGCTCAATTAATCTCATTCACTACAATCTTTTGGGTCCAACAAATGGTATCAGAGCTTGGATCTTGT  
TGTGGATTGGTTAAAGTTTTTTCAGAGATGGCTGCTTTGAAGTATGATATTCATAATTGAATCACAATACAAGGT  
TTTTCTTTGTGGCAAGTAAAGATGAAAGTTATTTTTGGCACAGTTAGATTTGGATGATGTGTTGCTGGGTTTTGAGA  
AGATACCAGCTAATTAGACAACGGAGGAGAAACAACAAAGGGATCAGAAGGCTTTGTGCTTGATTCAATTTTCATC  
TATCCAACAATATTCTGCAAGATGTCTTGAAGGGAAAAATAGCAGCTGCTTTATGGTTGAAACTGAAGCAGTTTT  
GTATGATCAAGAGTCTTGCTAGGAAACTGGCTCTAAAGCAGAAGCAGTGTTCTATCGCGTGGCAGAAGGAGAAT  
CGTTGGAAGACCATATTGCTGTGTTAAAGGAAATTATCGCAGATTTGGAACATTGGAGGTTAAGTGCGATAAAG  
ATGATCTTGCCTTAATCCTATTATGTTTCTGTTGCTGCTCTTATGCGTCGTTTCTGGGACTCCATTTGTATAGTC  
GAGATACTTTAACTATAGACGACGTCTATGATGATTTGCACCTAAAGAAGAAGTTGAAGTATTTGGTTGGAGCTA  
CATCAAAAAGATGAGGAAGCTATTGTATCTCATGGTGGTTCGACAGAGGGGCGGATCGAAGAATAACAGCAATTTT  
TTTTTGCTTCTACTACATACATAAGGGGGGACATATTGCGAAGGATTGTAATAAATTGCAAGCTAAAGGTGATTT  
AACTACAAATCGTAGAGCGCAACCTTTGACTTCATATGAAACAAATACAGTTGAGGATTTTTTCAGACGACAGAGA  
TGTGATGTTAATTGTAATATTTGACATGGAATCTATGCTCGATGCTTCAACTTTAAGGTTGCAAACCCAAGTGCA  
TGTTGTCTTAAGTAACTCAAAATTTGAGGTCGAAACCTAAGAAATTGGAAGGAAATAAATAATTTATGATGA  
GTGGTGAACAGTTGGTGGAAATACGATGGGAGAAGAACAACATAGAGTGTGAGGATTCACCTCGGATTAATGATG  
AATTACTCTTGATCTTTTTATTTAACTCATATGAAATATGGAATAAATAAATGATTGCAAAATATACTAAAAAGAT  
AGATCTTGATAATTATTTGAGGGAAAAATATGTCAAAATAAGTTGTTGGAATGTAGAGATTATCTAAGCATTTATT  
GTGTCAAAATTTGTCAACAATAAATCAAAGCCTTTAACAAGCAAAACTGTTTATAGAACATATACTTCAACCAA  
GCAAGAAGATGAACATTGAAGAACAAGTGAAAAATCGAAGACAATACTACGCATTACCAAAGTTTACCTCTA  
GCTCTAGCTAATGGTTTAGAAATACATAATGAAATGTTACAAAAAATGAAGGAAACTAAAATATGATGACGAAG  
AATTGATGCTCCAAAATCTTGGCCAAGGTCCCTTTTACAGGCAAAGAAATATCCAAAATGCAAGTGGACAATGCA  
ACTTGTTTTCTGTCCAGTTTTTAAGACAGTTGGAACATGCAACTTGATGCCAATTTTTCAGATACTTTGTGCAATGAA  
TTTAGACTTATGATCGATAGAAAAATTTGTTTCCACTTGAGTTAGCTTTCCATTGGTGTAATATCAGGTCCATAG  
GATCTATATAACTCTAGATATGGCCAAAACAATGAGTGCTGCTTCACAGGTAGAAAAAGTTGTATCCGGTAGGTAA  
CAAACCTGGACTTTACACAGTAATTTTGGCTACCTTATGATACAAATTTGACTTCTTGGTAAGCATAGAAGTTGTA  
GATACATATCATATCTTTCTAATCCAACCTGAAATCCTTGTTCGATAGCTACAACCTCGAGTTATGACTATTTT  
ACCGAGACAGCTGTATCTTGGCTCAAGACAGCTAATCATTTTTTTTACTTTTTCAACATCTTTTCTCCACTTGTCTCA  
CTTGTTCTATCTTGGAAATACATGTGAAATATATCGAATAAATACTCTTTCAAAAAGTATAATACTCATGCCAATA  
TGTATTTAAATACGTATTTTCGATTAATTGCATTTTTTAACCATGTATTTATGGAATTTGAATTTACAACAAGAGAA  
TTGATATTAAAGACTAACATTAGTGAATTTAAACAATTTGAATGTAAAATGTCTTGTAATTTGTATATCTTTGAA  
GCATTTTTTCGACAATAATCACCTGACGAGGAGTGAATCCTTGATTGACATGTTGCGATCATATATTTTCCAATC  
AAAATTTCTTTTACAGACATATGAGGCTGTCAAGTAAGGTGAGTTGTGATAGGAAACAACAGCTCTTGTGCTGTTG  
ATGAAATCGATCGAGTCAGATTAAGACTGCGAGATGGGACAGTCAGAACAATTGATCAGGTTCTGCATGTTCCAG

ACCTGGAAAAGAATATCATCTCACTTAGTACTTTGGATGCAAAATGGTATAAAATTCTCTAGTGGGAGTGGGGGTG  
GGGTGGGGTTCTGAAGGTTCAAATGGGAGTCCGAATTATATTGGAGGAACAGAAGAAGTCTCAGTTGTGTATCTT  
GCTGGAAGCGCAGAACTAGTTAAAAGATATCGGGACAAGTTCAGTACTGTGATAGATATTCAGTTTGGTACAGTA  
CCTCTTATGACGAGCTCTGGGTCAAGTTCAAAACATTGATCGGGGGAGCATTGGCGATTCTACTTTTCCACCAATT  
TCAGCAGATACACTGTGTTTCATTTGCTAGGGTTGGACTCATGGAGCGTAGATACCGTGGTGTCAATAATGTTTGG  
GATGCTTTTGGGGACGTTGAAGGCGACAGTTCTAGCAATGGGCTTTCTGATCCAATGTGTTGTATGGTTTCTGCT  
ACAGGATGTGCTTCGACTCTATTTGGTCAATAGTAATCCCTCAGTGAAATTTTGGAAACCTGAGATTTGGGTTCA  
AATGTCGTTTATGGACGCCTTGCGAAGACGACGGTTTGGTTTGGAGAGTTTGGTTACTGTGTTGAAGAGATTG  
ATTATTTTCGATGCAACCGATTGAAATCTTGAATTTCTCTTTGTTATACTAGAATTTGGGTCAAGGCGGAGTTT  
GTTGGGTTTGTACCCAAATTAGTGTTTTTTTTTTTTTAAATAAATTGTTTCCTTATTTTCATGTGATTTTTATG  
AAAATATATTATTTCTTATTCCACATTATTTTCATCTTTATACTATGTCATGTACCTATAAATAGTGTTCTTCT  
CTTTCAATTTTGTTCAAACAAGAATTGTTGAATTTCTTAAATTTCTCTCTATATTGTCGATTAATAAAATTTTCATG  
CTTCTGTGATTAAGTCTATTTGTTAATTTCTATACTTTTAAAGTCATGTTTCTTATTGCAATTTTCATTACTTCAT  
ATCGTGTCAATTAATTTCAATTCATTATAATCCTTCCGAGTCCAACATTACATTCCTATATTAAGTACTTCATAATT  
TTTTTCTCTACTACTTAAATGCTCCATTGGATAGTAAAATATTAATAAATCCATAGTAATATCTAGGAGTGTTAAC  
GAGTAGAGCTGAAATTTCTGGCTCGGGCTCAGCTTGAACTTTTTAAAGACGGGCTTTTTTTTTTGGTCAAGCCAAG  
CCAGATGAAAGCTCCGCCAAAAAATAAGGCTCAACCGGAGCTTTCGACTCGGGCTAGCCGAGCCAAGCTCAGTT  
TTTTGGAATTTTTTTAATTTTTTCCCTAAAAGTGGCATTGTGCTGCCTGTTTGGCAGCTAAATATAGGCTGCCTT  
TTCTAATCCCTTTTTTACGAGCCGACCCGACTTGAACCGACTCCCCAAATGGGGCTCCGTCGAGCCAAAGCCG  
ACTCGGGCTTTCCCGACCCAAATTTTCAGGCAATCTGAGCCGGCAAGCCGATTGTCATCTAGTAATACCCAT  
TCAACCCACTTTAATATCAACAAAATAAATACAATAAAAGATTATTTCACTTTCCCATTTACATTACAAAATTTCT  
AGAAAAATGAAATTAATAAATTAATAATGCATATATGATTTTGTGCTGGGTTGCAAGTGTCAGAAAGCATGGCAACA  
AGACTCTAAAGAGAGAGAGAGAGAGGGGGGCTTCTCTAGAAGACGGGTCTAATTTTAAAAGGGAAAAAAGTG  
GACCATAAATTTGGATGGAGCCCAATGTATTTTATTTTTTTTAAATTTAAAATATAAACATTTGTCAAAGGTTG  
CTTAAAATTTGTACACGTGTCATTCTGTGATAGGGTGGACATTCTGCATGGGTGGTACGACAGCCTCACCAAGAT  
TTTCTCGATGTAATGAGAGAGATTAATTATTCAATTACGCTACAAATATACCTATTTTACATCATTTTGTACAG  
CCCTCACACGATACAAGTGGGCCACGATTAAAATAATCGTGAGACTCACTCGTGTGAGTGGGCTGTCAAAGTGA  
GTGTTTCAGCAGATGCTGTACACTCAACTTAATTCTTAATTATTACAGGACAACTTTTACAGGATTATCTCCATTG  
TTGCAATAGTTAGGATAGAGGTGGGATAATCGATATATGTTTTTTTGGGGGAAAAAATAATAGCACCTAGTTTA  
TGAAATTGAATATTGAAATGTAGGGGGTTTTGAGGTAATTTTCCCTTGAATGAATTTATAATTACTTGCCTTG  
GAAGTTCGAAGACTTCTTATTAATTTCTACTAAAATTTTAAATGAAAACTAGTATATTAATTGATAATCTGTAC  
CTTTCCGGTTGTAAAAATTAGGAACATACTACCCTTAATCATTTATAAAAACCTCACAGAAATCCAATAATATTTA  
TCAAAAATAAAAATAATTAACATAATCTGGTGTTAACTGTAGCTGGGAGCAGAGTTTGTGTCACATTTATCCTG  
ATATTTGCTGCAACGGCCGGACCAATCGTAAACCAAAAGTACAATCAAGCCGAAACACTTATAGGCAACGCAGCA  
TGTGCTGGTCTCGCAGCTATGATCGTGATTTTATCAACAGGTCACATCTCGGGTGCTCATCTTAATCCGTCACCTC  
ACTATTGCTTTTTGCTGCAGTTCCGCCACTTCCCATGGGCTCATGTACCAGGCTACATTGTAGCACAAATTTACGCC  
TCCATTTGTGCTTCTTTGCGCTCAAAGGTGTTTTCCATCCTTTTATGTCCGGTGGTGTTACTGTCCCTTCTGTC  
AGCATAGGCCAGGCTTTTGCCTTGAATTTCTTATAACCTTCAATCTGCTATTTCGTGCTCACTGCTGTTGCCACT  
GATACCCGCGCTGTGAGAAATCAATTGAACATGAACATTCTTTTCATCAAATATTACAAATAACTAATCGCTATC  
TGAATTAATCTTGTGATAGGTTGGAGAATTAGCAGGCATAGCAGTTGGAGCCACCGTCATGCTTAATATTCTTG  
TTGCGGGGTGAGTAAATGATCCTTTTGTACGTCGTCTTCTTCTTGAAGTAATAGTAAATGAAAAGGGTGATGG  
AAAAAAGGACACTAGCTAATTATTTTGAATCTCTTTGAATTTGGCAGACCATCGAGTGGTGGCTCGATGAATCCTG  
TCCGAACCTTTGGACCAGCAGTGGCAGCAGGGAATTACAAGGCAGTCTGGATATACCTTTTGGCACCTACACTTG  
GAGCTCTTGCAGGGCTGGCATTATACTCTAGTTAAGCTTAACGGAGAAGAGGAAGAAGCCCCAAGCCAGGCCGA  
GGAGTTTCCGTCGCTAG

>OleurnIP5;1a

ATGCCGGAATTGCAAGTCGAAACTCTGACAATGTGCGGCCAGCGACGCCTGGAACGCCGGCGCCACTGATTTCT  
TCTCTGCGAATAGACTCAGTTTCTTACGATCGGAAGTCAATGCCACGATGCAAGTGCCCTGCCAGTTGATGCACCC  
ACTTGGGGTGCACCACATACGTGCAGCCTCACCGATTCTCTGTGCTGACATCTCTCTTACTCGCAAGCTGGGA  
GCAGAGTTTGTGTCACATTTATCCTGATATTTGCTGCAACGGCCGGACCAATCGTAAACCAAAAGTACAATCAA  
GCCGAAACACTTATAGGCAACGCAGCATGTGCTGGTCTCGCAGCTATGATCGTGATTTTATCAACAGGTCACATC  
TCGGGTGCTCATCTTAATCCGTCACCTCACTATTGCTTTTGTGCTGAGTTTCGCCACTTCCCATGGGCTCATGTACCA  
GGCTACATTGTAGCACAAATTTCAGCCTCCATTTGTGCTTCTTTTGCCTCAAAGGTGTTTTCCATCCTTTTATG  
TCCGGTGGTGTACTGTCCCTTCTGTGATAGGCCAGGCTTTTGCCTTGAATTTCTTATAACCTTCAATCTG  
CTATTGCTGCTCACTGCTGTTGGCAGTATACCCGCGCTGTTGGAGAAATTAGCAGGCATAGCAGTTGGAGCCACC  
GTACGCTTAAATATTCTTGTGCGGACCATCCGAGTGGTGGCTCGATGAATCCTGTGCGAACTCTTGAGCCAGCA  
GTGGCAGCAGGGAATTACAAGGCAGTCTGGATATACCTTTTGGCACCTACACTTGGAGCTCTTGACGGGCTGGC  
ATTTATACTCTAGTTAAGCTTAACGGAGAAGAGGAAGAAGCCCCAAGCCAGGCGAGGAGTTTCCGTCGCTAG

>OleurnIP5;1a

MPEFEVETLTMSAPATPGTPAPLISSLRIDSVSYDRKSMRCKCLPVDAPTWGAPHTCSLTDFSVDPDISLTRKLG  
AEFVGTFILIFAATAGPIVNQKYNQAETLIGNAACGLAAMIVILSTGHISGAHLNPSLTIAFAAVRHFPWAHVP  
GYIVAQISASICASFALKGVFHPFMSGGVTVPSVSIQAFALFLITFNLFFVVTAVATDTRAVGELAGIAVGAT  
VMLNILVAGPSSGGSMNPVRTLGPAVAAGNYKAVWIYLLAPTLGALAGAGIYTLVKLNGEEEEAPSQARSFRR\*

ATGCCGGAATTTCGAAGCCGGAACACCGACATTGTCTGGCGCCAGCGACGCCAGGAACGCCGGCGCCACTGATGTCT  
TCTCTGCGCATAGATTTCGCTGTCTTATGATCGAAAAATCAATGGCGCGATGCAAGTGCCCTTCCAGTTGATGCATCC  
ACGTGGGGTACACCACATACCTGCAGCCTCACCGACTTCTCTGTGCCTGACATCTCTCTTACTCGCAAGGTTAGAC  
CCACTTTTACGTTACAGTTAGATCTCTCTCTCTCTCCCTTGCCGCCTCAAGCATACTTAAAGTAGTTCAAAGGATAA  
GGGTGAGGTATATTTAGTCTTGTTGACAATCACACATAAAGGGATTCAATTCCTGAAACATGAATTGAAACTCTTT  
ATGGCATCAGTATACTGACAACCTTTTGTTCCTGACTTGTTAAGACACATTCCATGATTAACCTTCTCTCGAGATAC  
TCCAAGAACCTTGGGTTCAACTTTTTAAGATCTCTCTCTCTCTCGTGAATATAAATATGAACATATATGATTATTG  
ACGTGGAAATTGGAATGGGGTCCTTAGCTTTTCAAGTTGCCCTCTTTTAAATTTTCTTTGTTGAATACAATATGAATAA  
TGATCAGTCAGTCATTTCTTTTGTTCACGCATCCTATAAAATAAAAATGGTAGAAGTATGATTATGGCATGATTTTAG  
GTTAGAGGTTTAAATTCACATTTTTTTTTTAAACGCTTCTATGATGTGACGTAACGATAAGTTAGCATTGATGCGCGC  
ATTATTTGAAACATATGTTGATATAATTGTTATTGAAATTTTCATCAATTTTAGGAGATGATAGTCCAAAATGTTGT

AAATTTGAAACAAAGCCCTTGTTTCGACAATCATACTTTTCAAACTTTTTTTTTTCATACTTATTTTCAACCACACT  
 TTTCACATAATAAAATATTTTGTATGTAAACTCATTTTTTTTTTAACTACACATTCTCCTGAAAATCAATATTCAA  
 AACTCTATTTTATCCAAAAGTATGATTGTCAAACCTGGGGCTAAATTGAGTTCAATGATCTAACTGAAACAAAATT  
 GTAGTTTCATTCATCCAATTGAAAGACAATTGAAATTCATCACCTAATTGAGATTTTGTGAGACTTCTGAGTTC  
 AGTGACCGAAAATGAAATTTAACGAAGTGAATTGTTGATGTGGAGTGGGTCTTCGCTTAGTTGTGTCAAATGGG  
 ACCGGTCGCTAGGTCAAGGCCCCACCTCATTATAAACTCGTAATGAAACCAGTTCGAGTCAGTTCAGAGTTGGT  
 CCGCCAAAATGAACGAATCATGTCTGTTTGTATTGACTAGCCCAATAATCCATGAATTTTCAATTAGTTTGTCTCG  
 ATTATACCTACTGTAATCCTTCAATAATTTCTGTAATGAGTATCGATAGAGAATCTGTACCATTTTGTGTATATA  
 ACTAGGATGTACACTGAACTTATTTCATCCTAATGACAGAGGCCAAAACCCTCAGAAATTCGTTAAAAATTTGTC  
 AAAAATGAAGGAATTAACATATGTCAACATAATTTGGTGTAAATGTAGCTGGGACCAGAGTTTGTGTTGGGACATTT  
 ATCCTGATATTTGCTGCAACGGCCGGACCAATCGTAAACCAAAAGTACAATCAAGCTGAAACACTTATAGGCAAT  
 GCAGCATGTGCTGGTCTTGCCGTTATGATAGTGATTTTATCTACAGGTCACATCTCAGGAGCTCATCTTAACCCG  
 TCTCTCACTATTGCCTTTGCTGCACTTCGCCATTTCCCGTGGGCTCATGTACCGGCCTACATAGCAGCGCAGGTT  
 TCGGCCTCCATTTGTGCTTCTTTTGCCTCAAAAGGTGTTTTCCATCCTTTTCATGTCCGGTGGTGTGACTGTCCCT  
 TCTGTGAGCACCGGCCAGGCTTTTGCCTCTTGAATTTCTTATTACCTTCAATCTGCTATTTGTGGTTACTGCTGTT  
 GCCACTGATACCCGCGCTGTGAGTAATCAATTGAGCACCAACATTCTTTTCTTTCTCCTTTTCTTCAGATATTAC  
 AAAGTAATCAAATCCTTGTGACAGGTGGAGAATTAGCAGGCATAGCAGTTGGAGCCACCGTATGCTTAATATTC  
 TTGTTGCGGGGTGAGTTAACGATCCCTTTTGTCTTCATCTTCTTCTGAAAACAATGGTAATTGAAAATCGTGAA  
 GAAAAAAGGCCACAGCTAATTGTTTGTAGACTCTCTTGAATTGGCAGACCATCGAGTGGTGGCTCAATGAATCCT  
 GTCCGAATTTGGGACCAGCAGTTGCAGCAGGAAATTACAAGGCCGATATGGGTATACCTTCTCGCACCTACACTT  
 GGAGCTCTTGAGGGGCTGGTATTTATACTCTGGTTAAGCTTAATGGACAAGAGGAAGAAGCCCCACGCCAGGTG  
 AGGAGTTTCCGTCGC**TAG**

>*OleurnIP5;2*

**ATG**CCGGAATTCGAAGCCGGAACACCGACATTGTGCGGCCAGCGACGCCAGGAACGCCGGCGCCACTGATGTCT  
 TCTCTGCGCATAGATTGCTGTCTTATGATCGAAAATCAATGGCGCGATGCAAGTGCCCTCCAGTTGATGCATCC  
 ACGTGGGGTACACCACATACCTGCAGCCTCACCGACTTCTCTGTGCCTGACATCTCTCTTACTCGCAAGCTGGGA  
 CCAGAGTTTGTGTTGGGACATTTATCCTGATATTTGCTGCAACGGCCGGACCAATCGTAAACCAAAAGTACAATCAA  
 GCTGAAACACTTATAGGCAATGCAGCATGTGCTGGTCTTGCCGTTATGATAGTGATTTTATCTACAGGTCACATC  
 TCAGGAGCTCATCTTAACCCGCTCTCTCACTATTGCCTTTGCTGCACTTCGCCATTTCCCGTGGGCTCATGTACCG  
 GCCTACATAGCAGCGCAGGTTTTCGGCCTCCATTTGTGCTTCTTTTGCCTCAAAAGGTGTTTTCCATCCTTTCATG  
 TCCGGTGGTGTGACTGTCCCTTCTGTGACACCGCCAGGCTTTCGCTCTTGAATTTCTTATTACCTTCAATCTG  
 CTATTTGTGGTTACTGTCTGTTGCCACTGATACCCGCGCTGTGAGTGGAGAATTAGCAGGCATAGCAGTTGGAGCC  
 ACCGTATGCTTAATATTCTTGTGCGGGGTGAACCATCGAGTGGTGGCTCAATGAATCCTGTCCGAACCTTTGGGA  
 CCAGCAGTTGCAGCAGGAAATTACAAGGCGATATGGGTATACCTTCTCGCACCTACACTTGGAGCTCTTGACGGG  
 GCTGGTATTTATACTCTGGTTAAGCTTAATGGACAAGAGGAAGAAGCCCCACGCCAGGTGAGGAGTTTCCGTCGC  
**TAG**

>*OleurnIP5;2*

MPEFEAGTPTLSAPATPGTPAPLMSSLRIDSLSYDRKSMARCKCLPVDASTWGTPTHTCSLTDFSVDPDISLTRKLG  
 PEFVGTFILIFAATAGPIVNQKYNQAETLIGNAACAGLAVMIVILSTGHISGAHLNPSLTIAFAALRHFPWAHVP  
 AYIAAQVSASICASFALKGVFHPFMSGGVTVPSVSTGQAFALFLITFNLLFVVTVAVATDTRAVSGELAGIAVGA  
 TVCLIFLLRGEPSGGSMNPVRTLGPAVAAGNYKAIWVYLLAPTLGALAGAGIYTLVKLNGQEEEPQRVRSFRR  
 \*

## *OleurnIP5;3* *Oleurn061Scf4242g00005.1*

>*Oleurn061Scf4242:66824..76868* (- strand) class=gene length=10045

>*OleurnIP5;3*

**ATG**GCGGATTTTGAACCGGGGACACCAGGGACGCCGACAACGCCGACGCCGCTTATGTCTCTCTGAGAGTGGAT  
 TCACTGTCTGATACGATCGGAAGTCAATGCCGAGATGCAAGTGCTTGCCTTTGGTTTCGTCTACTTGGGCGGCACCT  
 CAAACTTGCCTCACCAATTTCTCTGCACCTGAAATTTCTCTCACTCGCAAG**TTTTACCATCTCTCTCTCACTCT**  
**AACACACGCGCGCGCACTGAGTTACTGAGATTTGAGATCCTTACACGCACGCACTATTTTCTGAGATCCTTGC**  
**ACGCACGAATTCCTGGAAAATATACTCGTTTTTCATGTATGGAAACAGGAAAGGAAAAGATGAAATCCAGTCCGGT**  
**TTTTATTTGAAACTTCTTTTGCCTTAGATTGTAGTATTACTATTACTATTACTATTATTGTTCCACTA**  
**TCTAAGGATCCAGGATATATTACTATTATAATACATATGGTCGGATTAATTTCCGTGCACGTCTGGTAAAGTTT**  
**ATAAGTGTATCAAATCTATTTTGTACTTGCATTTTTCGTACCTATGACTTTTACCCATTTATTATCCGTGCGACT**  
**TATAAGAGTTTCGATGTAAGTGCAAATTTTACTATTATTGATATATTGATTTTAAACGTTGTAAACTAGCAAACA**  
**ATTTGCATTGGCCACATTACATAACTGACAGGTTCAATTAATAATAAATGTTTTTTTGACCATTTTGTATTATA**  
**CAATCATTAAGTTAGCTAATAATTTGATTGAACATGTTGATATGTTTATGAGCCAAGACCTTACAATTTGTACTT**  
**GAGATAAAGCTCGTTTCATTAACAAGTAACAACCTTGGATATATACTGACTTTTTCAGCTTCAACCAAACTTTTGTTA**  
**GTGATTCCCTTATCTATGACGTGATGCATCATGTCAATCGACAGACATAGTCTGATAGTCGACATAGCCTTTGCTT**  
**CAGGTTCTTCCAATATGTGTCTTCTGGCTTCGTTCTTATAACATCTCACCATGTCTACTGCACTAATAGTTC**



CTTGACCTCATCTGCCATAATCCGAAATTTCCAATTCCATTGAACTTTGCATAAGAAACCCCAAACATCATAAAT  
TTGGCTCTGATATCGGTTGTTGTGCACATATTAACAGTAAATTTGAAGAGAAGAAGAATAATGAGATTGACACAC  
AGGAATTTAAGTGATTTCGTGAGAATAATCCACTAACTTCGAATAGGGTTACATAAAGTTTGTGTTATATAGAACCC  
TAATTATTCTTACAATACAAAATTATGAGCCACCTAATCAACAAGTAGGAAGCCAGCTTAGAATTTTTTTTCAGC  
CTTGCTTACAGCATAATGTGGCTGTTTCATTACATAAAAGACAGACGTGCAATTGCATAGTTTGGTTACGATGTAC  
ATTTTATATATTGGGATAGTAATTAGGTTGTGGATTGGGAAATTAGAGGATATTATATATGCTTGTGATGTGATT  
ATTTGATGTTTTGTGGTGAGTAGTGTAGAGCTTGATATAGAATTGAAAAAGAATCAGGTTGGCCTTTTGGTTTTAG  
CAGGTTGCTGCAGAGTTTTGTGGGAACATTTATTCTGATATTTGGCGCAACAGCAGGACCAATCGTGAACCAAAAA  
TATGATCGAGCAGAAGGTCTAGTAGGGAATGCGGCATGCGCTGGGTTGTCTGTTATGATAGTCATCCTTTCAACA  
GGACATATATCTGGAGCTCATCTTAATCCCTCCCTTACAATTGCCTTTGCTGCTCTTCGCCATTTCCCATGGAAT  
CATGTCCCGGCTTATATTGCAGCACAGGTTTCTGGATCTATTTGTGCTTCTTTTGCCTCAAAGGTGTATTCAAT  
CCTTTCTTGTGAGGTGGTGTCACTGTTTCTTCTGTCAATAACGGCCAGGCATTGCTCTTGAGTTCCTCATTACC  
TTTAATCTGCTGTTTGTGCTAAGTGCAGTTGCCACTGATACCCGTGCAGTAAGTAATTAATAATCAACAATATCA  
TGGTCTCAATAGAATCAGACTCTAAAAAACATAAAACAAAGCAGAACACAAAATTAATATCTTGCTGATGACAGT  
TTTTAATCAGGTCGGAGAATTAGCCGGATTAGCAGTTGGAGCTACAGTTATGCTCAACATTCTTGTGGCTGGGTG  
AGTGTAATTCCTTCTTGTGGCCTCTAATTGTCCTTGTGTTTCTTCTGCCATTACTTCCTCTTAGATCATCATAT  
TCATAATCAGTATATACAAGTTGCCTGGCATTAAATAGACTCTATCCATCTATTTATTCTCTATTGGATATTCT  
AAAAAATTTACTAGAAAGATATTTATGATTTGGCAGGCCTACTAGTGGTGGTTCAATGAATCCTGTGCGAACTCT  
GGGGCCAGCGGTTGCTGCAGGAAATTATAAGTCGATATGGATATACTTAGTGGCACCTACACTTGGAGCTCTTGC  
TGGGGCAGCTATCTATGCACTTGTGAAGCTTCGAGGAGATGAAGATACGAACCTCAACGTCAGCAGGGCTAGTTA  
G

>OleurNIP5;3

ATGGCGGATTTTGAACCGGGGACACCAGGGACGCCGACAACGCCGACGCCGCTTATGTGCTCTCTGAGAGTGGAT  
TCACTGTCTGATACGATCGGAAGTCAATGCCGAGATGCAAGTGCTTGCCTTTGGTTTCGTCTACTTGGGCGGCACCT  
CAAACCTGCCTCACCCATTTCTCTGCACCTGAAATTTCTCTCACTCGCAAGCAGGTTGCTGCAGAGTTTGTGGGA  
ACATTTATTCTGATATTTGGCGCAACAGCAGGACCAATCGTGAACCAAAAAATATGATCGAGCAGAAGGTCTAGTA  
GGGAATGCGGCATGCGCTGGGTTGTCTGTTATGATAGTCATCCTTTCAACAGGACATATATCTGGAGCTCATCTT  
AATCCCTCCCTTACAATTGCCTTTGCTGCTCTTCGCCATTTCCCATGGAATCATGTCCCGGCTTATATTGCAGCA  
CAGGTTTCTGGATCTATTTGTGCTTCTTTTGCCTCAAAGGTGTATTCAATCCTTTCTTGTGAGGTGGTGTCACT  
GTTCTTCTGTCAATAACGGCCAGGCATTGCTCTTGAGTTCCTCATTACCTTTAATCTGCTGTTTGTGCTAAGT  
GCAGTTGCCACTGATACCCGTGCAGTGGGAGAATTAGCCGGATTAGCAGTTGGAGCTACAGTTATGCTCAACATT  
CTTGTGGCTGGGCTACTAGTGGTGGTTCAATGAATCCTGTGCGAACTCTGGGGCCAGCGGTTGCTGCAGGAAAT  
TATAAGTCGATATGGATATACTTAGTGGCACCTACACTTGGAGCTCTTGTGTTGGGCGAGCTATCTATGCACTTGTG  
AAGCTTCGAGGAGATGAAGATACGAACCTCAACGTCAGCAGGGCTAGTTAG

>OleurNIP5;3

MADFEPGTPGTPPTTPTPLMSSLRVDSLSYDRKSMPRCKCLPLVSSTWAAPQTCLTHFSAPEISLTRKQVAAEFVG  
TFILIFGATAGPIVNQKYDRAEGLVGNAACAGLSVMIVILSTGHISGAHLNPSLTIAFAALRHFPWNHVPAYIAA  
QVSGSICASFALKGVFNPFLLSGGVTVPSVNNQAFALFLITFNLLFVVVTAVATDTRAVGELAGLAVGATVMLNI  
LVAGPTSGGSMNPVRTLGPAAVAGNYKSIWIYLVAPTLGALAGAAIYALVKLRGDEDTNLNVSRAS\*

## OleurNIP6;1 Oleur061Scf9039g00011.1

>Oleur061Scf9039:119150..124645 (+ strand) class=gene length=5496

>OleurNIP6;1

ATGGATGGTGAGGATATTGCATCAGCTCCTTCAACACCTGTAACACCAGGGACTCCAGGTGCTCCTCTCTTTTCGA  
GATTTCAAAAGGGACAATAATTGCTTTAATGGTAGAAAAATCATCTCTTCTTAAAGAGCAGCAAAATGCTTTAGTGCT  
GAAGCTTGGGAATTGGAAGAAGGGAGTTTCCCCCTGTCTCTTGTGCATTGCCCCACATTCTGTCTCTCTTGCA  
AGAAAGGTGTGCATGAACAACCTCTACTAAATCATCTTGTCTAATTTTCGTTTTATTTTATTTTATTTTATTTT  
TTTTCTTGAAGGCCTTTTAATAGGTGACAATGATATTTGTGTTAAGTTGTGGAACCTAATTATTGTTGAGCCATA  
ATTATTGCTGCTTCGCAGAGATGGTCGCGGATCAAATTAAGGGCTATTTACGAATTTATATTTTGTAAAATTAT  
ATGAAGGAATAGGAGTCTATATAAAATTTGATTTTAACCTAATTTATCTTATAAATAGATAGCAGACCTTAGACT  
TTATTTATTATCATCAAATGGAGAGAGAGAGATTGGAGAAAATATGATTGATATTTTTTCTTGTAACCTTTTTT  
CATCATAGTGAATTATTGTAGTGACAGGACAGGACGTAGTCTCATACTGAGACAAACCTCTATAAATCTTGCGTG  
CTTTGTTTGTGTTATTTCTTTCTATAACTTGATTGTTCTTGATGGGATAGAATTAGGGTTTATAAATTCAGAACAAT  
TTGAAGTTGGGATTCTCGACTGATATATATGTTTCTTACCAGATGGGAGCTGAGTTTATAGGTACCTCATACTT  
ATCTTCACTGGAACGCCACTGCCATTGTGAACCAACGACAAACGGATCGGAAACCTTATTGGCTTGGCAGCC  
TCCACCGGGCTGGCGGTGATGGTAGTCATACTCTCCACTGGTGCACATTTCTGGAGCTCATCTCAATCTGCTATC  
ACCATTGCCTTTGCTGCTCTCAAGCATTTTCCATGGAACATGTAAGCCCCCTCTTTGACAGCCATTATCCAAAAA  
TTATTTTTTTTCTACGTACTCATTTTTCAAAACATTTTTCTACTTTTAACCACACATTCTTCCAAAAATTCACCATT  
AAAACCTTTGTTTTTACCAATAATAGCCATTAAATAGGGCCTAAATTTACATTCATGGCTGACTGATAGTATTAG  
AAACTGTTAACAAAAAAGCTAAACTCTTGTCTGTTTCATGTCAACTATGGTGCTCTATCACATTGGATTGATTCA

ACTTTAATTTAATTTGGGTGCAGGTTCCCTTCTTACATTGGAGCCCAAGTAATGGCATCATTAAGTCTTCATTTCTG  
TGGTAAAAGGGATTTTCAATTTCTATGATGGGTGGGGGAGTAACAGCTCCCTCAGGGGGATATGCTCAAGCTTTTG  
CTTTGGAATTTATTATCACTTTCAACCTCATGTTTGTTCCTTACAGCAGTAGCCACAGATACAAGAGCTGTAAGTC  
TCCCTCTCTCTAGTTACTTTTCGAGATATATAATTAATTTATGAGTAAATTCCTCCATAGGTTCCAACTTTTTTCA  
TAAATATGGCAACCATGTCCCAATATTTAGTTTGTACTTCCATATTCCCAAACCTTCTAATAGCGTACGCACAAT  
ATCCTCACCTTATGGTAAATGTCAATTTAGACGTTAAATGTCCATGTGACACGTACAAAATGTTTGATTGAAAGG  
ATAAAATTTATTTAAAAAGATTTTTTTTTTATTCTTAAAGCAAAATGGTGTTTGTTCAAATTACACGAATGTGTTT  
TTTGTGAAAGATTTTACCCTTTGAGTAAGATAAAAACGTGCTTGTGCAAGACTATTTAATGATGAAATAGACAT  
TTTCTATCTAGTGTAATACTATTTACATAGTGTTAAAAGGTTGGGAACATGAATGTGCACAAATAGAATATAAAG  
GAGACTGATGCCATAGTTGTGAAAAGTTGAGAACCCTTGAAGAATATCCCTTTAAAATATCATGAGATTATGATA  
GAAAATGGAATATCCCATATAATTTTTTCCACTAGGGATTAATTTATTTGCTTCATTGCAGCAATCAAGAGACAA  
GAGTCAGTAGTAAATCTGAAATTCAACTTCAATGAATATTAATTGTAAATACAAATTAATAATATTATGTGTTG  
AGAGACTTGTGTCACTAGCCGAAGAAAGCCAGTCAGATAAATATGTGTTAGATTAAACAAGAGGAAATGTTTAAAG  
ATGGATCAAATTTGGAGAGAGAATGAATTCATTTTACCTAAAATAGTCTTATTTTTGTGATATTTTCGAGTATCA  
CCTACATTCACCCCTCTACCTCCCCATGCCTCTTTGTCCCTTCTCCTTGTAAAGGGATAAAAATTTTACATCAATTA  
AAGATGAAAATATAGATCAATTTATTATAGCTTGATCTATTCCCTTTAATAAGGTCGATCTTTTTAAGATGGAAC  
TCTAAATCTTAATCTAGTCTCAGAGTCTCTAACGAGTAATTCGATTAGATTAAAACTAAAAAAAATGAGCATACG  
AATTTGCAGATTGGTTTGTCTCAAATGAGCCACCATCTAGTGAGGGCATGTTAAGGGATAAAAATTTTACATCGATT  
AAAGATAAAAAAGTAGACCAATTTTTTAAGAATTTGGACTACTCATTTTAATAAAGTTGACTTTTAAAGTGTAAAC  
CTAAAATCTTCGTAGTCTCCCTAGATCCGGTCTCTTCCCTTAAGATCCTTAAGAGACTCTCGAGTAGTTCTTAAG  
CACGACTCAGGACTCCTTGATACTCTTTTCAACATAAAAACAAGTAGGGGATACATGGAGCGTAGAAGACTATTAG  
GGGACATTGGGCACATCAACAATAGTATGCCGTACTATCCAGAATAATTTTTTAAATTTTTTGAAACAATTTCTTA  
CTCCAAGGATCTCATCTTGGATCTCACTTCCAGTGCAAAATTAGTCATAGAATCTTCCAATGTGTATGCAGATTG  
GTTGTAGACTATAACATATTTTTGTGGAGTAACAGGTGGGCAAGCTGGCGGGAATTGCGGTAGGAGCTACTGTCA  
GCTCAATATACTGATTGCCGGGTGAGCTCAAAAGTTTCACTTTTACCTACCATTCTTCTGTTTTTGTTTTTTCCAG  
TCTATTAATTTGACTTGGATAAAAATTCATTTGATGTGCTACATTCAAACGCACCTTGCTGCAAAATACTCCATTGG  
CTTTACTATTTTACAACAGACAAGTCTTCCACCAATTTTTTACAACAAAAACAACAGACTTAATTTTACCATTGACA  
ACACAAACATCAAGAAAACATTGATAAAAGTGTGACTTCTTCTACGTTCCATTTTCAAGCATTTTTTAAACAAAACAT  
TGATAAAGTGCTTGTACTTTGGTATTTCTTCTTACCTCCAATTTCCATGCAAGGTAAGATTCCATTTTCTTTTGA  
GGCCCTAATAAAAAATTTTTTAATAATTTTTTAAAAATTTGTTAAGTGATTTTTTTTTTTTTTAAATTTATTGTAAGATA  
TATTTCTTGTCTATAAGTGAATTTTTTACTTATAAGTAATTTGTTTATATTTAAGTGAAATTTTAACTTATAA  
TTAAAGTTTGTAGTTATTTTTTTTTTTTGTACTTATAAATAAAATTTTAACTTAAAGAAAAGATTTTAAAGTTATAA  
GTTAATTTTTTTTACATAAGTGATTTTTTATTTTTTACTTTATTTAATTTTTTCTATCTTATAGAAATTTTACTT  
GTAAGTGATACGTAAATTTTTTATAATTATAAGTCAATTTTACAGATATAAGTATTTTTTTTATAGATAAGTAGTTTT  
TAGATCATTATACTAAGTAAATTTTTTCTTATAAGTGAACCTTTTAGTTATCACTAGTATTTTTTTATATAGAAGCA  
ATTGTACTACATAAAAGTGAATTATATATTACAAATAACTTTTTAATTATAAAGTAAATTTTTTTTATTATATAATT  
GAATTTTTTAGTTTATGTAGTTATGGTCAACTTTTTTACATAAAAGTGTTGTCTTATAAGCCTTTTTTTTCACTTAA  
AAATAATTTTTTTTAGTCCGAAGTAATTTTTTATTTATAATAGAATTTTAGTTATAATTTGCTAGATAGAGGCAGA  
TTTTTCTTTATTTTTTTAAGTGATTTTTTACTTATAAGTATATATTTTGTATATAAAGCGATTTTTTTAACTTATAAG  
TTTTTCTCTACTTGTATAGGTATTTTTTATAAAGTTAATTTTACTCATAAGTAATTTTTTGTCTCATATA  
CAAATTTTGTATTTAGAAGTAATTTTTTTTTTTAATTTTCACTTATATACATCTTTACTTATTATTAATTTTCTA  
TTATGCATAAGGTTTTCCATTTAAAAATGATTTTTTATCACTTATAAGTGAATATTTTTTTATTATAATTGAATTTT  
TTATAAGTGACTTATAATTTCTGAGCTCTTATTACTTGTAAGTAAATTTATGTACATTAATTCACATAATATAATC  
TTAGTTTCAATAATTTGTTGAATAAATAATATTGTCTGAACCCACTTTACATTGCATATTAATTTACGATTGAAT  
AAAGGATCAGGTTACTTTAATCTGGTATTAGTTGCACCAAAACACCATAAAAAGATTAATTAATAAATCTAATCC  
CTAGCTTGTCTAATAAGATGTGTCAAATATGTCTTAAATCAATAATGATAAACTAACTCACATGTTTATAAAGT  
TGAGAATTATCTTAAATGATTTCTTTTTTGTCTATGCCTTTCAATTTGTGCTTAGAAAATATTCAATCATCGTTTCA  
ATCAAAAACCTCCAACAAAAGGTGACGATTATTGTCAAATTACTACAACCCCTCATTTATACATGTATGAAAAACA  
TCAATTAATCTACTTGTACAACGTAAGTAGACAAAGTTTGTGACAAAATAGATGTTGGCCAGATTTAGGCCATT  
GATTTGTTTGGATTTCAAATTCGATTTTGAATGAGTGATATGGATCTTGCCAACCTCGTATTTTGTCAACCTCC  
TTTGTCAACGTCCTTTGTACTCATAGCATCACTCTGAAAAACATAGACAGTTATTCAAAGCAAGGATACATTGGA  
TGTTTTAAAACAACATATAATTTTAGAGGTTAAAACATTGAAGGTTGCTTTACATTAATCCTAATTACATGTAAGT  
CACTAACTTGTTTTTTGTTCCAATTGAAGCATTATAAATTAATTATAGTTTCAATTAATTATGCAGGAAATCCA  
CCGGAGCGTCAATGAATCCAGTGAGAACCTTAGGGCCAGCAATTGCCGCAAACTACAAAGCCATATGGGTAT  
ACCTCACTGCACCTGTCTTGGTGCCTTGGCTGGGGCAGCTGTTTATTCTGCAGTAAAGCTGCCTGATGAAGACC  
CCCTTAACACATAG

>OleurnIP6;1

ATGGATGGTGAGGATATTGCATCAGCTCCTTCAACACCTGTAACACCAGGGACTCCAGGTGCTCCTCTCTTTTCGA  
GATTTCAAAAGGGACAATAATTGCTTTAATGGTAGAAAATCATCTCTTCTTAAAGAGCAGCAAATGCTTTAGTGCT  
GAAGCTTGGGAATTGGAAGAAGGGAGTTTCCCCCTGTCTCTTGTGCATTGCCCCACATTCTGTCTCTCTTGCA  
AGAAAGTTTATAGGTACCCTCATACTTATCTTCACTGGAACAGCCACTGCCATTGTGAACCAAAAGACAAACGGA  
TCGGAAACCCTTATTGGCCTGGCAGCCTCCACCGGGCTGGCGGTGATGGTAGTCATACTCTCCACTGGTCACATT  
TCTGGAGCTCATCTCAATCCTGCTATCACCATTGCCTTTGCTGCTCTCAAGCATTTTCCATGGAACATGTTCCCT

TCTTACATTGGAGCCCCAAGTAATGGCATCATTAAGTCTTCATTTCTGGTAAAAGGGATTTTCAATTCTATGATG  
GGTGGGGGAGTAACAGCTCCCTCAGGGGGATATGCTCAAGCTTTTGCTTTGGAATTTATTATCACTTTCAACCTC  
ATGTTTGTCTTACAGCAGTGGGCAAGCTGGCGGGAATTGCGGTAGGAGCTACTGTCTCATGCTCAATATACTGATT  
GCCGGGAAATCCACCGGAGCGTCAATGAATCCAGTGAGAACCTTAGGGCCAGCAATTGCCGCAAACTACAAA  
GCCATATGGGTATACCTCACTGCACCTGTCTTGGTGCCTTGGCTGGGGCAGCTGTTTATTCTGCAGTAAAGCTG  
CCTGATGAAGACCCCTTAACACATAG

>OleurNIP6;1

MDGEDIASAPSTPVTPGTPGAPLFRDFKRDNNCFNGRKSSLLKSSKCFSAEAWEELEEGSFPPVSCALPPHSVSLA  
RKFIGTLILIFTGTATAIVNQKTNSETLIGLAASTGLAVMVILSTGHISGAHLNPAITIAFAALKHFPWKHPV  
SYIGAQVMASLTASFLVKGIFNSMMGGGVTPAPSGGYAQAFLEFIITFNLMFVLTAVGKLAGIAVGATVMLNILI  
AGKSTGASMNPVRTLGPAIAANNYKAIWVYLTAPVLGALAGAAVYSAVKLPDEDPLNT\*

## OleurNIP7;1a Oleur061Scf4622g04016.1 Corrected

>Oleur061Scf4622:475742..477284 (+ strand) class=gene length=1543

>OleurNIP7;1a

ATGCAGCAAAGTATGAAAGCACCATTTTCGGGAAGTGTATCGACTCCTAACATTTTAGGTAGTACAGCCACAAGA  
AGCCAGCCCCAAAATGACCTAGAAAATGGAGATTCAATGCTAAATGAACTCTCTTCAACTCTCTTCATAAAATC  
GACAAAAGTCTTGTGCGTAAGGTACATGTCTACAAAAGAATCTCCATATTTGCTCGTAAATCCATCTTTTCATC  
GTCTAAATCTGCAGGTATTGGCAGAGGCATTAGGGACATTTCGTGCTAATGTTCTGCATTTGCGCGATCATAGCAA  
TAATGCATTTAATCGGATTGGAAGCAGGCCTAATGGAATATGCAGCCACAGCAGCACTAACAGTAAGTGTATAG  
TTTTCTCCATAGGAGCAATTTCTGGAGCCCATGTCAATCCTGCTGTCACAATTGCCTTCGCAACTGTCGGCCCAT  
TCCCATGGTCCGAGGTAGTTCCAAGTCCAAAAGTGTAAATTTGAAGATACGGATCAAGAAATGAATTTCAAA  
TTTATTTCCCTTTATTCTTTGAAGGTTCCACTCTATATATTGGCACAATTTGGGGGATCTACTTTGGCAACTTAT  
ATTGCAAGATTAGTATATGGCATTAGATCAGAGCTTGTGATGACCAAACCACTCCAAGGATGCACTGCAGCTTTC  
TGGGTGGAGCTTATTGCAACTTTTCATAATTCCTTTTCTCCTCACTGCATCCTTGTCAAATGACCCCTCAATCTGTAAGA  
TTCTGTCAATTCTACTCGAGTCATTTTACGTTTCGACTACACTTATCCTGTGATATGTTTCGTTTAGAGTTATATC  
AGACATGTTGCACATATTAGGATATTCGATTTACAGTGTTCCTAGTAATATTTCTTCTGGTATGATATAGTGCCA  
TTTTTGCAGATAGGACAGGTGTCTGGCTTTGTTGTGCGGGTGGCCATTGGACTAGGAGTGCTAATTTCTGGGTAA  
AGCATAAATAATTACTTTATTACAACTAACTAGAACTCACCAGATTCACTTAAGTCGATTAAATTTATCAAATGCA  
GGCCTGTTTCAGGTGGGTCGATGAATCCAGCGAGATCGTTAGGACCTGCACCTGTTTCATGGAAATTTGATGATC  
ACTTATGATATATTTAGTAGCACCACCTATAGGAGCCATCGCTGGTGTTTTTGTGTACCGGATTTTACGGCTAC  
AAGGTTGGTCTTGTGAATCGAGTCAAGCCCCGAAAAGGAAGTGATTCTTTACATAG

>OleurNIP7;1a

ATGCAGCAAAGTATGAAAGCACCATTTTCGGGAAGTGTATCGACTCCTAACATTTTAGGTAGTACAGCCACAAGA  
AGCCAGCCCCAAAATGACCTAGAAAATGGAGATTCAATGCTAAATGAACTCTCTTCAACTCTCTTCATAAAATC  
GACAAAAGTCTTGTGCGTAAGGTATTGGCAGAGGCATTAGGGACATTTCGTGCTAATGTTCTGCATTTGCGCGATC  
ATAGCAATAATGCATTTAATCGGATTGGAAGCAGGCCTAATGGAATATGCAGCCACAGCAGCACTAACAGTAAGT  
GTTATAGTTTTCTCCATAGGAGCAATTTCTGGAGCCCATGTCAATCCTGCTGTCACAATTGCCTTCGCAACTGTC  
GGCCCATTTCCCATGGTCCGAGCTTGTGATGACCAAACCACTCCAAGGATGCACTGCAGCTTTCTGGGTGGAGCTT  
ATTGCAACTTTTCATAATTCCTTTTCTCCTCACTGCATCCTTGTCAAATGACCCCTCAATCTGTAAGATTCTGTCAATTC  
TACTCGAGTCATTTTACGTTTCGACTACACTTATCCTGTGATATGTTTCGATAGGACAGGTGTCTGGCTTTGTTGTC  
GGGGTGGCCATTGGACTAGGAGTGCTAATTTCTGGGCCTGTTTCAGGTGGGTCGATGAATCCAGCGAGATCGTTA  
GGACCTGCACCTGTTTCATGGAAATTTGATGATCACTTATGGATATATTTAGTAGCACCACCTATAGGAGCCATC  
GCTGGTGTTTTTGTGTACCGGATTTTACGGCTACAAGGTTGGTCTTGTGAATCGAGTCAAGCCCCGAAAAGGAAGT  
GATTCTTTACATAG

>OleurNIP7;1a

MQQSMKAPFRELSSTPNILGSTATRSQPKNDLENGDSMLNETLFNSLHKIDKSLVRKVLAEALGTFVLMFCICAI  
IAIMHLIGLEAGLMEYAATAALTVTVIVFSIGAIISGAHVNPVATIAFATVGPFPWSELVMTKPLQGCTAAFVVEL  
IATFIILFLTASLNDPQSVRFQFYSSHFTFDYTPVICSIGQVSGFVVGVAIGLGLVLIISGPVSGGSMNPARS  
LGPALVSWKFDHLWIYLVAPTIGAIAGVFVYRILRLQGWSCCESSQARKGSDSLH\*

## OleurNIP7;1b Oleur061Scf1371g00022.1

>Oleur061Scf1371:75020..76568 (- strand) class=gene length=1549

>OleurNIP7;1b

ATGCAGCAAAGTATGAAAGCACCATTTTCGGGAAGTGTATCGACTCCTAACATTTTAGGTAGTACAGCCTCAAGA  
AGCCAGCCCCAAAATGACCTAGAAAATGGAGATTCAATGCTAAATGAACTCTCTTCAACTCTCTTCATAAAATC  
GACAAAAGTCTTGTGCGTAAGGTACATGTCTACAAAAGAATCTCCCATATTTGCTCGTAAATCCATCTTTTCAT

CGTCTAAATCTGCAGGTATTGGCAGAGGCATTAGGGACATTTCGTGCTAATGTTCTGCATTTGCGCGATCATAGCA  
ATAATGCATTTAATCGGATTGGAAGCAGGCCTAATGGAATATGCAGCCACAGCAGCACTAACAGTAACTGTTATA  
GTTTTCTCCATAGGAGCAATTTCTGGAGCCCATGTCAATCCTGCTGTCACAATTGCCTTCGCAACTGTCGGCCCCA  
TTCCCATGGTCCGAGGTAGTTCCAAGTCCAAAACCTTGTTAAATTTGAAGATACGGATCAAGAAATTTGAATTTCAA  
ATTTATTTCCCTTTTTCTTTGAAGGTTCCACTCTATATATTGGCACAAATTGGGGGATCTACTTTGGCAACTTAT  
ATTGCAAGATTAGTATATGGCATTAGATCAGAGCTTGTGATGACCAAACCACTCCAAGGATGCACTGCAGCTTTC  
TGGGTGGAGCTTATTGCAACTTTTCATAATTCTTTTCTCCTCACTGCATCCTTGTCAAATGACCCCTCAATCTGTAAGA  
TTCTGTCAATTCTACTCGAGTCATTTTACGTTTCGACTACACTTATCCTGTGACCGCAGATATGTTTCGTTTAGAG  
TTATATCAGACATGTTGCACATATTAGGATATTTCGATTTACAGTGTTTCTTAGTAATATTTCTTCTGGTATGATAT  
AGTGCAATTTTTTGAGATAGGACAGGTGTCTGGCTTTGTTGTGCGGGTGGCCATTGGACTAGGAGTGCTAATTTTC  
TGGGTAAAGCATAAATAATTACTTATTACAACTAACTAGAACTCACCAGATTCACTTAAGTCGATTAAATTTATC  
AAATGCAGGCCTGTTTCAGGTGGGTTCGATGAATCCAGCGAGATCGTTAGGACCTGCACTTGTTCATGGAAATTT  
GATGATCACTTATGGATATATTTAGTAGCACCAACTATAGGAGCCATCGCTGGTGTTTTTGTGTACCGGATTTTA  
CGCTACAAGGTTGGTCTTGTGAATCGAGTCAAGCCCCGAAAAGGAAGTGATTCTTTACATTAGGTTG**TAG**

>OleurNIP7;1b

**ATG**CAGCAAAGTATGAAAGCACCATTTTCGGGAAGTGCATCGACTCCTAACATTTTAGGTTAGTACAGCCTCAAGA  
AGCCAGCCCCAAAATGACCTAGAAAATGGAGATTCAATGCTAAATGAACTCTCTTCAACTCTCTTCATAAAATC  
GACAAAAGTCTTGTGCGTAAGGTATTGGCAGAGGCATTAGGGACATTTCGTGCTAATGTTCTGCATTTGCGCGATC  
ATAGCAATAATGCATTTAATCGGATTGGAAGCAGGCCTAATGGAATATGCAGCCACAGCAGCACTAACAGTAACT  
GTTATAGTTTTCTCCATAGGAGCAATTTCTGGAGCCCATGTCAATCCTGCTGTCACAATTGCCCTTCGCAACTGTC  
GGCCCATTTCCCATGGTCCGAGCTTGTGATGACCAAACCACTCCAAGGATGCACTGCAGCTTTCTGGGTGGAGCTT  
ATTGCAACTTTTCATAATTCTTTTCTCCTCACTGCATCCTTGTCAAATGACCCCTCAATCTGTAAGATTCTGTCAATTC  
TACTCGAGTCATTTTACGTTTCGACTACACTTATCCTGTGACCGCAGATATGTTTCGTGCAATTTTTGCAGATAGGA  
CAGGTGTCTGGCTTTGTTGTGCGGGTGGCCATTGGACTAGGAGTGCTAATTTCTGGGCCTGTTTCAGGTGGGTTCG  
ATGAATCCAGCGAGATCGTTAGGACCTGCACTTGTTCATGGAAATTTGATGATCACTTATGGATATATTTAGTA  
GCACCAACTATAGGAGCCATCGCTGGTGTTTTTGTGTACCGGATTTTACGCTACAAGGTTGGTCTTGTGAATCGA  
GTCAAGCCCCGAAAAGGAAGTGATTCTTTACATTAGGTTG**TAG**

>OleurNIP7;1b

MQQSMKAPFRELSSTPNILGSTASRSQPKNDLENGDSMLNETLFNSLHKIDKSLVRKVLAEALGTFVLMFCICAI  
IAIMHLIGLEAGLMEYAATAALTVTVIVFSIGAIISGAHVNPVITIAFATVGPFPWSELVMTKPLQGCTAAFWVEL  
IATFIILFLTASLNDPQSVRFQFYSSHFTFDYTPVTADMVQFLQIGQVSGFVVGVAIGLGLVLISGPVSGGS  
MNPARS LGPALVSWKFDDHLWIYLVAPTIGAIAGVFVYRILRYKVLVNRVKPEKEVILYIRL\*

## OleurSIP1;1a Oleur061Scf4272g01002.1

>Oleur061Scf4272:214508..224653 (+ strand) class=gene length=10146

>OleurSIP1;1a

**ATG**GGGTGCTATAAAGGCAGCGGTAGCCGATGGGGTGTGACTTTTATGTGGGTTTTTTGCGCATCGACTTTGGGC  
GCACTCACTTTTGTGGTGGCTTCTGCTCTCGGAGTATCCCAAGGACTACCCACTCTTCTCGTCACTACTGTCTCTT  
GTTTTTGTACTGCTGTTTCGTGTTTCGGCATCATCGGCGATTTCTTGGGCGGCGCCACCTTCAATCCCACTGCAATC  
GCTGCTTTCTATGCCGCTGGTATTGGAGGCGCCGATTCTCTCTTCTGCTGCCCTCCGCTTTCTGCCCAG**GTA**  
**TGAATCATGTGATTAGTCAGATATTGATCATGTTTCTTGAGAGTATGTAATCCTACTTGCTTGATTCAAATGTAG**  
**ATTAGTATGTGAATATTGTCAAGTCAGATGATATGTTTGTGAAAATCTAGATTGCTTAGGGCTAGATCTATATAATG**  
**GAATTTAAGATTTTAAAAAAGGAGGTCTCCCTTGACAGATGATATAGTTGAGAAAACCTAACAGATTGAACATG**  
**AACGACCAAAATTTAAATAAAAGGCACACATGAATAATGAGTTTGCAAATAATAAACTTTGGTGACTAACACGAAA**  
**ATTTTACCACAATTTAAGTGTATACTATGCAGGGAATGAAAATGCTAAAGTTATTACTTTTATCCTTGACAGGCG**  
**GCTGGTGCAGTAGGTGGTGTCTTGCAATTATGGAGGTTATGCCAATGCAGTACAAACACATGCTTGGGGGTCTCT**  
**TCATTGAAGGTTGACCTGCACACTGGAGCTATTGCTGAGGGCGTTTTGACTTTCACAATTACCTTTGCTGTCTCT**  
**CTCATAGTCTCTTAGGGGTCCAAGCAACCCACTAGTGAAGAATTGGTTGCTTGCCATGGCAACTGTTTCGGCAGTC**  
**GTTGCCGGTTCAAGTTATACTGGACCTTCGATGAATCCTGCCAATGTAAGTGACATATCTCTTTCCATTCTATC**  
**GCTAGATTCTGAAATTATATGATGATCTATGTCTTATTGTGGAATACCTTAATCCTTAAAAAATTGCTGAGTAATC**  
**AAAAAATTAAGAAACAAAATAACATGAGGTGAGAGTTTCTCTTTCCCATAGCACATAAGGACAACGTATCTGCT**  
**GAACCTTTCTCTAATTTTTTTTTTTCACATCCCAAGCCAACCTGGAATAGAGTAGTTACTTTTCTCAATATGGTA**  
**CCCGACCGTGTCTTTTAAAAATAAAAAATGTTTATATGTAATGTGATTGAGCTTAGACATCTGAAGCACAATTTA**  
**GAGTACTGCTCGCATTTGGCTCCCATATTTCCATTTAAGAGGTCACGAGTCGCATCATTATTGTCTGTGTGG**  
**GATGTCAAATTATCTCACTACCAAGTTTCTCTTCCGCTCATGTGCCACCTTGTGATTGATCGATTAAAGTGCT**  
**GTTACCCTAATTAGGACCCACAGCAAAACAGTAGCCCTTTCTTTTACATTGACCTTAAGTGGGTTTGGAAAGTTC**  
**ATCTATCGTAAACTTCAGATCACTTTCCACATGATTGGATTTTTCTCCAACCTTGAATAACCAATCATTTTTCGT**  
**ATTGAGTCTGAAAACCTCAGCTTGATCATTAACCTTTTCAAGATTCAAAGAATATAGTTTTAGCTTTTGTCTATTTT**  
**GACCATTATGGTCTGGTAGTGGCATTGATTTCCAGACTCAGCCATTACTTGGGAGCATTGTGTGAAATAGCATCT**  
**GCTGTAGGAATAAGGACAATGTCTTGGGAAAGTCAATTTTGGAGAGATGAAAAGCTTGCTGGTACATCAGTTATA**

TAACCGGTTGTAGAAAGTTGCATTGGAATTGAATAGCGCATGCTGAGCACGCAATAGAATGCATGCTTCAATTAA  
TTAGTAGAGAAATGATAAAATTACATATGAAGAAGAATGATGAAGACTTTAAATTTTTCAGCTCAAGCTTCTAAT  
ACTTAGGTTTTCTTCCAACCGAAGCTACTATTTATTCACTTTGGTGCGTGGGACTTGGGCACCTATATCCAACCTCA  
AGTTCAATGTGTATCTTTTTCAAGTTTCACGCTATTAACTAATGAAGTTTTCTGGGGAAAGTGTGTTAAAAATTC  
TGTCTGGAAGTAACTACTGCAGAGTTTTCTTGAAAAAGTAATCTGTCTTTCTCAACTATTTTTGTGGCCATAAA  
TTAGGTTTCATTAATGGATTAATTATGTCATGACCATTTCGCTAATAATCTACTACACAATTGCTGAACAATTGAA  
ATATGCCCCGACGCAATGAAGGAATTGTGAGAATAAAAAGTTTGAGACTTGAGATGAACCAAAAAGGAAGTTTCTC  
ACTTCACCACAGTGCTAGCCTGAATAAGGATGGAGATTAGAGAATAATCACAAAGCAAATTAAGGGCTTAGGATT  
AAATTAATCCAAGCTATCCAATACTTAGTCATATTAGTCAGACAAAATGTCTGATTTTTTATACATGCATTTGGA  
ATAAAATATGAATTTTTTAGTTTTTCATTTTTTTTTTGAGTTCCTATTTTTTTTTCCCACATGTCAAAACCTTTATTATA  
TTGAAAAACATAAATAGGTATCTAAAATAATAAGTAATAATTTATAATGAGTTAGTATTTAATCCAATTAGGAA  
ACCTTCTATTTTTTTGTATGTGCTTAGTTAAAAATAAAATATCCAAATATAAATACCTCTAAAACCTCAATTAAA  
TCATCACTTGGAATTCTGAGTAATTAACCACCAATGGTTTGCCAATGACCTTAGGACGAACAAAAGTATCTAA  
GCTCTAATGAGATCCCCTGAATACTGGGCAAATTATGTTGAAGTAACATTATTGTATCTTGTCCATAACCTACCA  
ATAACTTTGAATGCCCTTATGGAATGAATATCCTCGACCCATAGAAAATGGAAAATTATCAACCTTTTAGGTTACA  
TTTTGACATTCCAATCTTCCTTGATTCACTAATTCGAACCATGTGTGTAACGCTTCGAGATCTTTTTCATCTTCA  
TTATTTTATTCTTTTATAAAAAATAGGCTCAAGGTGTTACTAACATCTTCTTGTCTAATTTAAAAAGAAATATCA  
GTTTCATTAAAGTGTGAAAAATGCATAAAAAATACTATTAAATAATGTGCACAAAATTCAATATGAAGATGTTCTT  
TAAATAAAAGATTGACAAATTATCTTTTTCAGAAAATTACTTGGCGATCCCATAAGCTACACTCGGTCAATCTTA  
TATGCCTCCAAACGACCCGTTCTCATCTGAAAGGTATTGTAAGGTGATTTTTGAAAACATTTCAGTAAGAATACG  
AGCACATTTTTTATTAACACGATATAAATATAAAACTGACATAATATATCGACATTTCTTAGATTTAGAGTTCAAG  
GAATTTATTAAGAATTCCTATATCCCCTAAGATTTAACATTTTTGACTAAACAGTCCATCCCGTAGGATTTAACA  
TTTTTGACCTAACGGTCCATCTAGAAGGATTTAACATAGAGTTCGACTGAAGGCCTCATAGCATTTTATGCCAAA  
AATTATACAAACATCAAGGAATAAGAATTTACCATTTTGCACGATGTATTCTTACCTCAATGATACCAAAACAAA  
ATATGAAAATATGGTTTGTAGAATAGAAAAATAAATTATTTCTAATAGATTGTGTGTATGTGAATTTATAGGGAG  
TGCACCCTTTTTTTCTGGGAATTATAATCTAGTCAGATCACCTATATATATATATATATATATATATATATATAT  
ATATATATATATATATATATATAGATTTAATAGGCTCGTGATATTCTTTTCAATTTCCAACGTACCAATATGAATTA  
AATGAAAGTTTTGATTTATTATTTTATTACTATTTTATATTTTGCTTATAAAATAAAATATAAAATCTAGAATGCTT  
TCTTTATAACAAAATATCTCGGGTATAACTAGTTTAAAAATTACTTTTTCTTGATTCCAAATTATATTATTTAAT  
ACAAGCGATAAAACGAGTATAATATTTTATATTTTATCAACTTCTAAAATACGTAAATAAATATTCGACCCAAATA  
AGATTTACGATAAATCTAAGTACACATGAGCAGAAAATAAATCATCAATTTTTGGACTTTTAGTGTAACGACAAAT  
CTAAACATGAATTTGTTTCATTTGCTAAGTGACCCATAAAAAGTTTCGTGGTGTTACAATGTGACCACCAATATTGA  
TGCAAGATAAAATAAGGAGAAGGGGAAAGGGGAAAGGGGAAAGGGGAGAGAAGAGGAGAAAAGGAGG  
CGGAAAGATAAGAAGGGGGGAGAAAATAGAGAGAAAATAGGAGAGAACATCAAGTCATTTTATAATCAAAAGATTAT  
TTCCAATTACATTGCATAGACCCTTTATATAGGGTTTGAACATAATTATATTTGAAGTAAGAAAATACTCAAAATA  
AATACTAATTATGTTTCTTAAATAAACTTTAGAATGAAAATAAATACTAAAATCCATCCTAATTCTCCAT  
CATTTCTCCTAAGCTGAGATAACTCGACTCCAGCAAAAATAAATTGCAACTTCTTACCCAAGGAGGGCAATGTTTC  
TTCTTCACCAATAATGGACCATTACATATCAATAATTGAACCTGAAAAACATTACAAAACCTCCAATTTGAC  
CAAAGGGCTCATAACCAAATAGCAATAAGGAACCTTAGGAAGCCACAACCTTGTGCAACTCATTTACAAAACTGT  
TACAAGATCCACTTGAAGGGCACAAGGTACTAGCACAAATCGACTAGCTTGCAGAAAATGAATAAATGCAACAATGG  
TGGCTCGAATGTACCCTGACAAGGCAACAATTCTGTTATATTGAAAATAAAACCTCATTTAAGTGTGATGGCCA  
ATCTAATAGATTAAATTCAAGTGAGAAATTTAATCGTTTCTCTACATGTGTAAGAAAAGTGTGTTGAACGAACAAT  
GACATTAGATAATGTGGTAACCCGAGAAGCATCACAAAGTAAAGGTAACAAATATCAAAGTCAACGATAGAGTC  
ATACAACAGATTAGGCAAGATCAATTTTGGCAGCTAGTCGTAGGTAGGTGGATTGTTTGTGACTCAGGTGACAAATA  
TATAGATAATTCCCCTATCGATATTAGAATATTCAATTGACTCAACGATAGAAACCTCAATTTCTTCTTCAAG  
AGCAATACAATACTAGACTCAAGAGATGATTGTTGGAATGGGTGGTAGACCTAGCTTATGACACGCTTCGCGAAGA  
TGGAAGGATAAGTTCCATAGGTTGTCCTGTTGGTAAGCTTTGTCTAAGGATTGGAATGTAGGAATATCATTAGGC  
AAAGTTTCAGGATTCAAACCATTGATAAACCTAGATGTTGTGATGTAGAGAGCCTTATAAATATAAATAATTGTTT  
AATAACTCTTCGAAGTGGGCAAAATATGCAGTACAGTGGACGTACCTTGCCTAAAGTGCAAAAAGTATTGATTT  
AACAATTGAGTTCGATAATTTACATATGCATATTTATTACTTAGGACTTGTTCATCTCATCCCACAAGGTGACA  
CTGCGTTGGCCTAGACGATTATGCAAATATGATCTCCAATAAATTTTAGTAGAATCGACCGATGATATATACTAG  
CATGACAAATTTTACATGCATCACTCAAATTTGTGATAGAAAAAGAATTTTTCAAGATTATCAAGCCAATCAAGAA  
CTGAATCAGATCCAGTGAGACATTAAAGTCCTATAGGTGGATTGCAACTTGCTGAGGAGAAGAATGTACCTTTTT  
TGACAAAGGTATTAGACGGGGGAAAATTGCGCGGATAAGTGCAAGTGAAGGTATATGGTTGTGGTAGTGACCTAA  
GGATGTGTTGTGGGCGTAATGTTGTTACATGAAGTGATGTAGTGTACGATGACATTTTTTTTTTTTTTTTTTT  
TTTTTATTATTATAAAAAATGAGTTTGTATGGGCTACGAACCGGAAATGAAAAGCAAAAGCGTTCAAATAACAAGAT  
GATATACCTTACAAAAGTCCAATCAAGCCGCTGGTTGAGCACCAATTTTAAGTTCCAATCTGACAGATTATACAC  
TTTATTGTAAAATTAAGTCTAGCTCACGAGAGACACAAGTTGTGGCGGTGCAATTTAGTTCTGCTGCCCCAATAA  
TCTGAAAAATAAACTATAAGCCAGTATGTGGAATTAACCGCAAGTTGCTATAAACACTCTTGTGTTGTTCTGCTAT  
GTAAAAGGATGAAGCTTCTGCAGCTCAAATGTGCTCTGAAATTGAAAGAAAACCTAGTAAAACATGTGAGCTTTT  
GATATAGATTGAGTGATTTTGCAGTGACCAAGCGAATTGTTGAGATGGAACTATAGTGTAGATTAGGAATAATT  
TGGATGGGAGAAAAATCCAAAACCTAGTTGGGGATCATTGTTAATTGAAATATTAGGGAGGATTGTGAGAGTGTGA  
AGGAAAAGTGTGTAAGAATAGAGAGATACAGATTTGTGCAGTGACAGCGATGCGTGTGGTGATGGAAGTGGGCC

GGCACCGAGGAATCAGGCAGTCATGGCTACAGATGTTCTGGTATTTGGTGTGTATAGGATGGACTTTTATGTGAT  
GGGTACTATACGTGTATTTTAGAATTTGATGTGGGCTGGGTATGTGTTGTGTTGCTTGTGTTTGGATAGGTGGA  
TGATAATATTTGGTTAGTGGGTTGGGTTAGGGTAATTGGTTATGGGTTTCATTGGGCCATTGGATGTTGGCGAAT  
GTGTGTATATGTATATGGGTTAGTGGGTTGGTGTAAACAATTAGGGTTTGGGGAAATTATCTAGTGGGCCAGGTT  
GGTATGGGCTTGGTCTTGCTTGATGTATAGGCTATTGGGTTTCGTATAGGTGGGTAATATAGGGTTTCTTCGGTTG  
AAAGCAACCAAATTGGCCTGATCAAAAATAAATTGTACTATTTTTTTTCAGAACTGATGAAAATACTAAAATTAA  
AAATTTACGGGTGTAAACAGTATCCACTAATAGTACAATGAGCAATAACTTCTTCTTTCTTTCTTTTTTTTTTTT  
TTTTTTTGGTTGATGCCTGCTGCCACCTTTTTTTGTGGTTTAAAGTAGGTTTTGGCCGGATATGTTGGCGGCTATG  
GTTTGATTGTTGAATGATGAAACGGGTGGTTTTAAATGTGGAAGTGAAATTTGTCGGTCAAGGGGAAAGAAATTGAG  
CTCTACTACCAAATTGATGTAGGATACAATAAGGAGAAGGGGAAAGGGGAGAGAAAAAAGAAATGAGGGGGGA  
AAAGAGAAGGGGAGAGAAATAGAGAGAAATAGGGAGAGTATCAATTTATTTTATAATCAAAGGTATTTCCAATT  
ACATTGCATAGACCCTTTATGTAGGGTTTGAATTAATTATAATTGAAGTAAGAAAATACTCTAAATAAATCACTA  
ATTGAATCCATCCTAATTCTCCATCAGATATGTATCCATATTTGAAATCCAATATCTAATATCTGTTAACTAAAA  
TACAATAATCATATATTGAATGATTATACGCATGATGTCTGTTGTGAGCCTATGTTTGACTCATGTTTATAAACA  
CTGAAATAATTTTTTCTCACATTTTCATGGGACCTACCAAATACTTATTTATCCACCACCTCATTTGTATCTAT  
TTATGGTTTTAAACCATTTATAAACAATTTTCATTACGCTTTAAGAGATATCTGGTGCCTATTGACAATATTTAA  
TTCCATAACCATAAAGATGTTTCACTCAACTTATTGAGGGTATTGGCCGTAAGTAAGATCTCTTCTGTTGATATT  
TCAAAGTAATAAATCTTATGATTTGAATCTATTTTTCTTTTTTAAAGATTAAAGACATACATGCTTTAGTAGTTGA  
AGAAAACCAATCTAATGCAATTGTATATGAATTTTCTGTCTGGGTCTTGTTCAACGCATCGAACCCCATGT  
ACACACTGCATGTCAAACCCAAAATCTCATTTTGGCAACCAAGATAAATCGCCCCATCCCGTAGAGGTTGACGTG  
CTACAATTTATGATGAGTTGTCATAACTCAACCTAACTGTGATCTGGTAATAAAGTTACATGGAACCTCTTGATTC  
TATCTTCTTAGCCAGTGTACATATCCCAAGTCATGTACAGTTTAAATTCAATGGCATTGTAAATTTTCATCTAACA  
AATTGCCTGCTGTAAATGTATATTGGTAATGAATTCAAAATCTACTAAAGGTAAAGAACGATTGCAGTACTTAAC  
TAGTTGTATACACAAGAAGTTAACCTGATAATGCATGTAGGATCTACTGTTTGTGTTGATTGGTAAGAGATTCTTG  
GAGTTTCCACGTAGGTCAAGAGGAGGTAGTTGTGTATGCCATGCAATACTGTGTGAGAGCTGCTCAGTTTCAG  
TGTCTATCTTAACTTTTAAAGGAAGGAAGAAAAACCACCTTCACAGATTCATGACACAGATGTTCTTTCTCTTTGG  
AAAACCTCTGTCTGGATAGAACTTCCACGTGCTGGTGCCTCTGCTGTTTTTACCTTTTCTCCTCCTCTTTTTTCCC  
TGTATTCTAAAGTAGGTCCTTTCAAAAAGTATTTGATGCTTTTGTGTTGATCTTTTTTCTTTGGAACATTTTGGT  
CCCCTTTCTTCATCTGTTACTATGGTATGCCTTTAAGAAGATGGAATCCAATAACATTCCATCAATTGTGCCGGT  
TCTTTTAAACGAATCCCAATTCCACTTTGGGAGAAATTAAAATTAATTTGTATAACTGCTGAATTAATTGGATTGT  
TGCAAGTGAATGAATGGGATGCGGTCTGTTACATAGCAAATTAATACTAATTTCAATTTATCAATTTAGACTTA  
CTAATTAGCTGATCTAAACTTCTATTTAGCTACATATTTGAATCACTAGGCTCAAATCTTGAACCTCAAATAAGTG  
CCGAGAACTTTTGAAGTATAACTAGCAGTTTAAAAATTGAATAAATTTATCAAACTGTTCTTTAGATATTGGCA  
GTTTTGCCGAGCAAAGAATTGTTTAAATATAATAAAAAATTGAGGTACCGTTTCAGGACATTATAAGAGTTCTGATC  
TGTAAGTGTCTGCAATTTTTCTTTATGTGTTTTCTTGAATATGGAAAGTCAAAGTTGTTCTTTGAAGTCTTATA  
TTTGCATTTAGTTTCTTGATTCTCTTTCTCCTAATCTGACTTCTCTATCCTCAAAATTTTCAGAAGATAATTTT  
GCTTAGTGATAGTTTCGATTCTGTGTGTAATTCATAGCTACTACGGCAAGGATTGCTGTGGTTTAGTTTAGTT  
TCTTGCAAGTGTGCTAACATCCAAACATCTTGTGTAATTCATCATTCTTAACCTGTTCTTATTATTTTATTAG  
CTATTTTCCGCAAAGCTTGTGTTAAAATTGGATGCTAATCGTGTCTAATATATTGCAGGCATTTCGGGTGGGCATA  
TGTATATAATAAGCACACACATGGGAGCAATTCTATGTTTACTGGATCTGTCCATTCACTGGAGCAATATTGGC  
TGCGTGGACCTTCCGCTTTCTATTCCCGCCCCCAACAAAGCAGGACAAGGCGAAGAAAGCC**TGA**

**>OleurSIP1;1a**

**ATG**GGTGCTATAAAGGCAGCGGTAGCCGATGGGGTGTGACTTTTATGTGGGTTTTTTTGGCGATCGACTTTGGGC  
GCACTCACTTTTGTGGTGGCTTCTGCTCTCGGAGTATCCCAAGGACTACCCACTCTTCTCGTCACTACTGTCCCTT  
GTTTTTGTACTGCTGTTTCGTGTTTCGGCATCATCGCGGATTTCTTGGGCGGCGCCACCTTCAATCCCACTGCAATC  
GCTGCTTTCTATGCCGCTGGTATTGGAGGCGCCGATTCTCTCTTCTGCTGCCCTCCGCTTTTCTGCCCAGGCG  
GCTGGTGCAGTAGGTGGTGTCTTGAATTATGGAGGTATGCCAATGCAGTACAAACACATGCTTGGGGGTCCCT  
TCATTGAAGGTTGACCTGCACACTGGAGCTATTGCTGAGGGCGTTTTGACTTTCACAATTACCTTGTGTCCCTT  
CTCATAGTCCTTAGGGGTCCAAGCAACCCACTAGTGAAGAATTGGTTGCTTGCCATGGCAACTGTTTCGGCAGTC  
GTTGCCGGTTCAAGTTATACTGGACCTTCGATGAATCCTGCCAATGCATTTCGGGTGGGCATATGTATATAATAAG  
CACAACACATGGGAGCAATTCTATGTTTACTGGATCTGTCCATTCACTGGAGCAATATTGGCTGCGTGGACCTTC  
CGCTTTCTATTCCCGCCCCCAACAAAGCAGGACAAGGCGAAGAAAGCC**TGA**

**>OleurSIP1;1a**

MGAIKAAVADGVLTFMWVFCASLTGALTFFVVASALGVSQGLPTLLVTTVLVFLVFLVFGIIGDFLGGATFNPTAI  
AAFYAAGIGGADSLFSAALRFPQAAGAVGGALAIMVMPMQYKHMGLGSPSLKVDLHTGAIAEGVLTFTITFAVL  
LIVLRGPSNPLVKNWLLAMATVSAVVAGSSYTGPSMNPANAFGWAVYNKHNTWEQFYVYWICPFTGAILAAWTF  
RFLFPPTTKQDKAKKA\*

## **OleurSIP1;1b Oleur061Scf2367g00017.1**

**>Oleur061Scf2367:30689..40838 (- strand) class=gene length=10150**

**>OleuSIP1;1b**

**ATG**GGTGCTATAAAGGCAGCGGTAGCCGATGGGGTGTTGACTTTTATGTGGGTTTTTTGCGCATCGACTTTGGGC  
GCACTCACTTTTTGTGGTGGCTTCTGCTCTCGGAGTATCCCAAGGACTACCCACTCTTCTCGTCACTACTGTCCCTT  
GTTTTTGTACTGCTGTTTCGTGTTCCGGCATCATCGGCATTCTTGGGCGGCGCCACCTTCAATCCCCTGCAATC  
GCTGCTTTCTATGCCGCTGGTATTGGAGGCGCCGATTCTCTCTTCTGCTGCCCTCCGCTTTCCTGCCCAG**GTA**  
**TGA**ATCATGTGATTAGTCAGATATTGATCATGTTTCTTGAGAGTATGTAATCCTACTTGCTTGATTCAAATGTAG  
ATTAGTATGTGAATATTGTCAGTCGATGATATGTTTGTGAAAATCTAGATTGCTTAGGGCTAGATCTATATAATG  
GAATTTAAGATTTTTAAAAAAGGAGGTCTCCCTTGACAGATGATATAGTTGAGAAAACTAACAGATTTGAAC**TCG**  
AACGACCAAATTTAAATAAAAGGCACACATGAATAATGAGTTTGCAAATAATAAACTTTGGTGACTTACACGAAA  
ATTTTACCACAATTTAAGTGTATACTATGCAGGGAATGAAAATGCTAAAGTTATTACTTTTATCCTTGACAG**GCG**  
GCTGGTGCAGTAGGTGGTGTCTTGTCAATTATGGAGGTTATGCCAATGCAGTACAAACACATGCTTGGGGGTCCCT  
TCATTGAAGGTTGACCTGCACACTGGAGCTATTGCTGAGGGCGTTTTGACTTTCACAATTACCTTGTGTCTCTT  
CTCATAGTCCTTAGGGGTCCAAGCAACCCACTAGTGAAGAATTGGTTGCTTGCCATGGCAACTGTTTCGGCAG**TC**  
GTTGCCGGTTCAAGTTATACTGGACCTTCGATGAATCCTGCCAAT**GTA**AGTGACATATCTCTTTCCATTCTATC  
GCTAGATTCTGAAATTATATGATGATCTATGTCTTATTGTGGAATACCCTAATCCTTAAAAATTGCTGAGTAATC  
AAAAATTAAGAAACAAAATAACATGAGGTGAGAGTTTCTCTTTCCCATAGCACATAAGGACAACGTATCTGCT  
GAACCTTTCTCTAATTTTTTTTTTTCACATCCCAAGCCAACCTGGAATAGAGTAGTTACTTTTCTCAATATGGTA  
CCCGACCGTGTTTCTTTAAATAAAAAAATGTTTATATGTAATGTGATTGAGCTTAGACATCTGAAGCACAA**TTT**  
AGAGTATGCTCGCATTTGGCTCCCATATTTCCATTAAAGAGGTCACGAGTCGCATATTATGCTCTGTTGTG  
GGATGTCAAATTATCTCAACTACCAAGTTTCTCTTTCCGTCTATGTGCCACCTTGTTGATTGATCGAATTAGTGC  
TGTTACCCTAATTAGGACCCACAGCAAAACAGTAACCTTTTCTTTTACATTGACCTTAAAGTGGGTTTGGAAGTTC  
CATCTATCGTAAACTTCAGATCACTTTCACATGATTGGATTTTTCTCCAACCTTGGAATAACCAATCATT**TTTCG**  
TATTGAGTCTGAAACTCCAGCTTGATCATTAACCTTTCAGATTCAAAGAATATAGTTTTAGCTTTTGCTCATT  
TGACCATTATGGTCTGGTAGTGGCATTGATTTCCAGACTCAGCCATTACTTGGGAGCATTGTGTAATAGCATC  
TGCTGTAGGAATAAGGACAATGTCTTGGGAAAGTCAATTTTGGAGAGATGAAAAGCTTGCTGGTACATCAGTTAT  
ATAACCGGTTGTAGAAAGTTGCATTGGAATTGAATAGCGCATGCTGAGCACGCAATAGAATGCATGCTTCAATTA  
ATTAGTAGAGAAATGATAAAATTACATATGAAGAAGAATGATGAAGACTTTAAATTTTTCAGCTCAAGCTTCTAA  
TACTTAGGTTTCTTCCAACCGAAGCTACTATTTATTCACTTTGGTGCGTGGGACTTGGGCACCTATATCCA**ACTC**  
AAGTTCAATGTGTATCTTTTTCAAGTTTCACGCTATTAACTAATGAAGTTTTCTGGGGAAAGTGTGTTAA**AAAT**  
CTGTCTGGAAGTAACTACTGCAGAGTTTTCTTGAAAAAGTAATCTGTCTTCTCAACTATTTTGTGGCCATAA  
ATTAGGTTCAATTAAGGATTAATTATGTATGACCAATTCGCTAATAATCTACTACAAATGTGTAACAAT**TGA**  
AATATGCCCGACGCAATGAAGGAATTGTGAGAATAAAAAGTTTGAGACTTGAGATGAACCAAAAGGAAGTT**CT**  
CACTTCACCACAGTGCTAGCCTGAATAAGGATGGAGATTAGAGAATAATCACAAAGCAAATTAAGGGCTTAGGAT  
TAAATTAATCCAAGCTATCCAATACTTAGTCATATTAGTCAGACAAAATGTCTGATTTTTATACATGCATTTGG  
AATAAAATATGAATTTTTTAGTTTTTCATTTTTTTTTGAGTTCCTATTTTTTTTCCACATGTCAAA**ACTTTAT**TAT  
ATTGAAAAACATAAATAGGTATCTAAACTAATAAGTAATAATTTATAATGAGTTAGTATTTAATCCAATTAGGA  
AACCTTCTATTTTTTTGTATGTGCTTAGTTAAAAATAAAATATCCAATATAAATACCTCTAA**AACTCA**ATTAA  
ATCATCACTTGGCAATTCTGAGTAATTAACCACCAATGGTTTGGCCAATGACCTTAGGACGAACAAAGTATCTA  
AGCTCTAATGAGATCCCTGAATACTGGGCAAATTATGTTGAAGTAACATTATTGTATCTTGTCCATAACCTACC  
AATAACTTTGAATGCCCTTATGGAATGAATATCCTCGACCCATAGAAATGGAAAATTATCAACCTTTTAGGTTAC  
ATTTTGACATTCCAATCTTCCTTGATTCACTAATTCGAACCATGTGTGTAACGCTTCGAGATCTTTTTCATCTTC  
ATTATTTTATTCTTTTATAAAAAATAGGCTCAAGGTGTTACTAACATCTTCTTGTCTAATTTAA**AAAGAA**ATATC  
AGTTTCATTAAGTGTTGAAAATGCATAAAAAATACTATTAAATAATGTGCACAAAATCAATATGAAGATGTTCT  
TTAAATAAAGATTGACAAATTATCTTTTTCAGAAAATTTACTTGGCGATCCCATAAAGTCACTCGGTCAATCTT  
ATATGCCTCCAACGACCCGTTCTCATCTGAAAGGTATTGTAAAAGTGATTTTGA**AAACAT**TCAGTAAGAATAC  
GAGCACATTTTTATTAACACGATATAAAATATAAACTGACATAATATATCGACATTTCTTAGATTTAGAGTTCAA  
GGAATTTATTAAGAATTCCCATATCCCTAAGATTTAACATTTTTGACTAAACAGTCCATCCCGTAGGATTTAAC  
ATTTTTGACCTAACGGTCCATCTAGAAGGATTTAACATAGAGTTCGACTGAAGGCCTCATAGCATT**TTAT**GCCAA  
AAATTATACAAACATCAAGGAATAAGAATTTACCATTTTGCACGATGTATTCTTACCTCAATGATACCA**AAACAA**  
AATATGAAAATATGGTTTGTAGAATAGAAAAATAAATTATTTCTAATAGATTGTGTGTATGTGAATTTATAGGGA  
GTGCACCTTTTTTTTCTGGGAATTATAATCTAGTCAGATCACACACACATATATATATATATATATATATATATA  
TATATATTAGATTTAATAGGCTCGTGATATTCTTTTCAATTTCCAACGTACCAATATGAATTA**AAATGAAA**GTTTT  
GATTTATTATTTTATTACTATTTTATATTTTGCTTATAAAACAAAATATAAAATCTAGAA**TGCTTCTTTATA**ACAA  
AATATCTCGGGTATAACTAGTTTAAAAATTACTTTTTCTTGATTCCAAATTATATTATTTAATACAAGCGATA**AAA**  
ACGAGTATAATATTTATATTTTATCAACTTCTAAATACGTAATAAATATTCGACCCAAATAAGATTACGATA  
AATTTCTAAGTACACATGAGCAAAATAAATCATCAATTTTTTGGACTTTTAGTGTAACGACAAATCTAAACATGAAT  
TGTTTCATTTGCTAAGTGACCCATAAAAAGTTTCGTGGTGTACAATGTGACCACCAATATTGATGCAAGATA**AAAA**  
TAAGGAGAAGGGGAAGGGGAAGGGGAAGGGGAAGGGGAAGGGGAAGGGGAGAGAAGAGGAGAAAGGAGG  
CGGAAAGATAAGAAGGGGGGAGAAAATAGAGAGAAATAGGAGAGAACATCAAGTCATTT**CATAATCAA**AGATTAT  
TTCCAATTACATTGCATAGACCCTTTATATAGGGTTTGAAC**TAATTATATTTGA**AGTAAGAAAATACTCAA**AAATA**  
AATCACTAATTATGTTTCTTAAATAAACTTTAGAAATGAAA**ACTAAATATACT**AAAATCCATCCTAAT**TCTCCAT**  
CATTTCTCCTAAGCTGAGATAACTCGACTCCAGCAAAATAAATTGCAACTTCTTACCCAAGGAGGGCAATGTT**TC**  
TTCTTCACCAATAATGGACCCATTACATATCAATAATTGAACCTGAAAACATTCACAAACTTCCAATTTGAC

CAAAGGGCTCATAACCAAATAGCAATAAGGAACTTTAGGAAGCCACAACCTTGTGCAACTCATTTACAAAACTGT  
TACAAGATCCACTTGAAGGGCACAAGGTACTAGCACAAATCGACTAGCTTGCAGAAATGAATAAATGCAACAATGG  
TGGCTCGAATGTACCCTGACAAGGCAACAATTCTGTTATATTGAAAAATAAAACCTCATTTAAGTGTGATGGCCA  
ATCTAATAGATTAAATTCAAGTGAGAAATTTAATCGTTTCTCTACATGTGTAAGAAAAGTGTGTTGAACGAACAAT  
GACATTAGATAATGTGGTAACCCGAGAAGCATCACAAAGTAAAGGTAAAAACAATATCAAAGTCAACGATAGAGTC  
ATACAACAGATTAGGCAAGATCAATTTTGGCAGCTAGTCGTGGATAGGTGGATTGTTTGACTCAGGTGACAATAA  
TATAGATAAATCCCCATCCTCGATATTAGAATATTTCAATTGACTCAACGATAGAAACCTCAATTTCTTCTTCAAG  
AGCAATACAACCTAGACTCAAGAGATGATTGTTGGAAATGGGTGGTAGACCTAGCTTATGACACGCTTCGCGAAGA  
TGGAAGGATAAGTTCCATAGGTTGTCCTGTTGGTAAGCTTTGTCTAAGGATTGGAATGTAGGAATATCATTAGGC  
AAAGTTTCAGGATTCAAACCATTGATAAACCTAGATGTTGTGATGTAGAGAGCCTTATAAAATATAATAATTGTTT  
AATAACTCTTCGAAGTGGGCAAAATATGCACTAGCAGTGGACGTACCTTGCCTAAAGTGCAAAAAGTATTGATTT  
AACAATTGAGTTCGATAATTTACATATGCATATTTATTACTTAGGACTTGTTTCATCTCATCCCACAAGGTGACA  
CTGCGTTGGCCTAGACGATTATGCAAATATGATCTCCAATAAATTTTAGTAGAATCGACCGATGATATATACTAG  
CATGACAAATTTTACATGCATCACTCAAATTTGTGATAGAAAAAGAATTTTTCAAGATTATCAAGCCAATCAAGAA  
CTGAATCAGATCCAGTGAGACATTAAAGTCCTATAGGTGGATTGCAACTTGCTGAGGAGAAGAATGTACCTTTTTT  
TGACAAAGGTATTAGACGGGGAAAATTGCGCGGATAAGTGCAAGGTGAAGGTATATGGTTGTGGTAGTGACCTAA  
GGATGTGTTGTGGGCGTAACTGTTGTACATGAAGTGTATGTAGTGTACGATGACATTTTTTTTTTTTTTTTTTT  
TTTTATTATTATAAAAAAGAGGTTTGATGGGCTACGAACACCGAAATGAAAAGCAAAGCGTTCAAATAACAAGAT  
GATATACCTTTACAAAAGTCCAATCAAGCCGCTGGTTGAGCACCATTGTTAAGTTCCAATCTGACAGATTATACAC  
TTTATTGTAAAATTAAGTCTAGCTCAGGAGAGACACAAGTTGTGGCGGTGCAATTTAGTTCTGTGCTGCCCAATA  
TCTGAAAAATAAACTATAAGCCAGTATGTGGAATTAACCGCAAGTTGCTATAAACACTCTTGTTGGTTTCGTCTAT  
GTAAAAGGATGAAGCTTCTGCAGCTCAAATGTGCTCTGAAATTGAAAGAAAACCTTAGTAAAAACATGTGAGCTTTT  
GATATAGATTGAGTGATTTTTGCAGTGACCAAGCGAATTGTTGAGATGGAACTATAGTGTAGATTAGGAATAATT  
TGGATGGGAGAAAAATCCAAACTAGTTGGGGATCATTGTTAATTGAAATATTAGGGAGGATTGTGAGAGTGTGA  
AGGAAAAGTGTGGAAGAATAGAGAGATACAGATTTGTGCAGTGACAGCGATGCGTGTGGTGATGGAAGTGGGCC  
GGCACCGAGGAATCAGGCAGTCATGGCTACAGATGTTCTGGTATTTGGTGTGTATAGGATGGACTTTTATGTGAT  
GGGTACTATACGTGTATTTTAGAATTTGATGTGGGCTGGGTATGTGTTGTGTTGCTTGTGTTTTGGATAGGTGGA  
TGATAATATTTGGTTAGTGGGTTGGGTTAGGGTAATTGGTTATGGGTTTCATTGGGCCATTGGATGTTGGCGAAT  
GTGTGTATATGTATATGGGTTAGTGGGTTGGTGTAAACAATTAGGGTTTGGGGAAATTATCTAGTGGGCCAGGTT  
GGTATGGGCTTGGTCTTGCTTGATGTATAGGCTATTGGGTTTCGTATAGGTGGGTAATATAGGGTTTCTTCGGTTG  
AAAGCAACCAATTTGGCCTGATCAAAAATAAATTGTACTATTTTTTTCAGAACTGATGAAAATACTAAAAATTAA  
AAATTTACGGGTGTAACAGTATCCACTAATAGTACAATTGAGCAATAAATTAACCTTCTTCTTTTTTTTTTTTTT  
TTTTTTGGTTGATGCCTGCCGCCACCTTTTTTGTGGTTTAAAGTAGGTTTTGGCCGGATATGTTGGCGGCTATGG  
TTTGATTGTTGAATGATGAAACGGGTGGTTTAAATGTGGAAGTGAATTTGTGCGTCAAGGGAAAAGAAATTGAGC  
TCTACTACCAAATTGATGTAGGATACAATAAGGAGAAGGGGAAAGGGGAGAGAAAAAAGAAATGAGGGGGGAA  
AAGAGAAGGGGGAGAGAATAGAGAGAAATAGGGAGAGTATCAATTTATTTTATAATCAAAGGTTATTTCCAATTA  
CATTGCATAGACCCTTTATGTAGGGTTTGAATTAATTATAATTGAAGTAAGAAAATACTCTAAATAAATCACTAA  
TTGAATCCATCCTAATTCTCCATCAGATATGTATCCATATTTGAAATCCAATATCTAATATCTGTTAACTAAAAT  
ACAATAATCATATATTGAATGATTATACGCATGATGTCTGTTGTGAGCCTATGTTTGACTCATGTTTATAAACAC  
TGAAATAATTTTTTTCCTCACATTTTCATGGGACCTACCAAACTACTTATTTATCCACCACTCATTTGTATCTATT  
TATGGTTTAAACCATTTATAAACAATTTTCATTACAGCTTTAAGAGATATCTGGTGCTATTGACAATATTTAAT  
TCCATAACCATAAAGATGTTTCACTCAACTTATTGAGGGTATTGGCCGTAAGTAAGATCTCTTCTGTTGATATTT  
CAAAGTAATAAATCTTATGATTTGAATCTATTTTTCTTTTTTAAGATTAAAGACATACATGCTTTAGTAGTTTGA  
GAAAACCAATCTAATGTGATGCAATTTGATATGAATTTTCTGTCTGGGTCTTGTTCAACGCATCGAACCCCATGTA  
CACACTGCATGTCAAACCCAAAATCTCATTTTGGCAACCAAGATAAATCGCCCCATCCCGTAGAGGTTGACGTGC  
TACAATTTATGATGAGTTGTCTAACTCAACCTAACTGTGATCTGGTAATAAAGTTACATGGAACCTCTTGATTCT  
ATCTTCTTAGCCAGTGATACATATCCCAAGTCATGTACAGTTTAAATTCAATGGCATTGTAAATTTTCATCTAACAA  
ATTGCCCTGCTGTAAATGTATATTGGTAATGAATTAATTAATACTAAAGGTAAAGAACGATTGCAGTACT  
TAAGTAGTTGTATACACAAGAAGTTAACCTGATAATGCATGTAGGATCTACTGTTTGTGATTGGTAAGAGATT  
CTTGGAGTTTCCACGTAGGTCAAGAGGAGGTAGTTGTGTATGCCATGCAATACTGTGTGCGAGAGCTGCTCAGTT  
TCAGTGTCTATCTTAACTTTTAAGGAAGGAAGAAAAACCACTTCACAGATTTCATGACACAGATGTTCTTTCTCT  
TTGGAAGAACTCTGTCTGGATAGAACTTCACGTGCTGGTGCTCTGCTGTTTTTACCTTTTCTCCTCCTCTTTTT  
TCCCTGTATTCTAAAGTAGGTCCTTTCAAAAAGTATTTGATGCTTTTGTGTTGATCTTTTTTCTTTGGAACATTT  
TGGTCCCCTTTCTTCATCTGTTACTATGGTATGCCTTTAAGAAGATGGAATCCAATAACATTCCATCAATTGTGC  
CGGTTCTTTTAAACGAATCCCAATTCACCTTTGGGAGAAATTAATAATTGTTGATAACTGCTGAATTAATTGGA  
TTGTTGCAAGTGAATGAATGGGATGCGGTCTGTTACATAGCAAATTAATAATTGCAATTTCAATTTTCAATTTGAG  
CTTACTAATTAGCTGATCTAAACTTCTATTTTAGCTACATATTTGAATCACTAGGCTCAAATCTTGAACCTCAAATA  
AGTGCCGAGAACTTTTGAAGTATAACTAGCAGTTTAAAAAATTGAATAAATTTATCAAACTGTTCTTTAGATATT  
GGCAGTTTTGCCGAGCAAAGAATTGTTTAATATAATAAAAAATTGAGGTACCGTTTCAGGACATTATAAGAGTTCT  
GATCTGTAAGTGTCTCAAAATTTTTCTTTATGTGTTTTCTTGAATATGGAAAGTCAAAGTTGTTCTTTGAAGTCT  
TATATTTGCATTTAGTTTCTTGATTCTCTTTCTCCTAATCTGACTTCTCTATCCTCAAAATTTTCAAGAGATAA  
TTTTGCTTAGTGATAGTTTCGATTCTGTGTGTAATTCCATAGCTACTACGGCAAGGATTGCTGTGGTTTAGTTT  
AGTTTCTTGCAAGTGTGCTAACATCCAAACATCTTGTAATTCATCATTCTTAACCTGTTCTTATTATTTTTTA



TTAGCTATTTTCCGCAAAGCTTGTGTTAAAATTGGATGCTAATCGTGTCTAATATATTGCAGGCATTTCGGGTGGG  
CATATGTATATAATAAGCACACACATGGGAGCAATTCTATGTTTACTGGATCTGTCCATTCACTGGAGCAATAT  
TGGCTGCGTGGACCTTCCGCTTTCTATTCCCGCCCCCAACAAAGCAGGACAAGGCGAAGAAAGCC**TGA**

>**OleurSIP1;1b**

**ATG**GGTGCTATAAAGGCAGCGGTAGCCGATGGGGTGTTGACTTTTATGTGGGTTTTTTGCGCATCGACTTTGGGC  
GCACTCACTTTTGTGGTGGCTTCTGCTCTCGGAGTATCCCAAGGACTACCCACTCTTCTCGTCACTACTGTCCCT  
GTTTTTGTACTGCTGTTTCGTGTTTCGGCATCATCGGCGATTTCTTGGGCGGCGCCACCTTCAATCCCACCTGCAATC  
GCTGCTTTCTATGCCGCTGGTATTGGAGGCGCCGATTCTCTCTTCTCTGCTGCCCTCCGCTTTCCTGCCCAGGCG  
GCTGGTGCAGTAGGTGGTCTTGTCAATTATGGAGGTTATGCCAATGCAGTACAAACACATGCTTGGGGGTCCCT  
TCATTGAAGGTTGACCTGCACACTGGAGCTATTGCTGAGGGCGTTTTGACTTTCACAATTACCTTTGCTGTCCCTT  
CTCATAGTCCTTAGGGGTCCAAGCAACCCACTAGTGAAGAATTGGTTGCTTGCCATGGCAACTGTTTCGGCAGTC  
GTTGCCGGTTCAAGTTATACTGGACCTTCGATGAATCCTGCCAATGCATTTCGGGTGGGCATATGTATATAATAAG  
CACAACACATGGGAGCAATTCTATGTTTACTGGATCTGTCCATTCACTGGAGCAATATTGGCTGCGTGGACCTTC  
CGCTTTCTATTCCCGCCCCCAACAAAGCAGGACAAGGCGAAGAAAGCC**TGA**

>**OleurSIP1;1b**

MGAIKAAVADGVLTFMWVFCASLTGALTFFVVASALGVSQGLPTLLVTTVLVFLVFLVFGIIGDFLGGATFNPTAI  
AAFYAAGIGGADSLFSAALRFPQAAGAVGGALAIMVMPMQYKHMGLGGSPLKVDLHTGAIAEGLVLTFTITFAVL  
LIVLRGPSNPLVKNWLLAMATVSAVVAGSSYTGPSMNPANAFGWAYVYNKHTWEQFYVYWICPFTGAILAAWTF  
RFLFPPTKQDKAKKA\*

### **OleurSIP1;3 Oleur061Scf0342g12031.1**

>Oleur061Scf0342:1258679..1261622 (- strand) class=gene length=2944

>**OleurSIP1;3**

ATGGGTGCTATTAAAGCAGCGGTAGCCGATGGGGTGCTGACTTTTATGTGGGTTTTTTGCACATCGACGTTGGGC  
GCACTCACTTTTGTGGTGGCTTCTGCTCTCGGAGTATCCCAAGGCTACCCACTCTTTTCATCACTACTGTCTC  
GTTTTTCTCTCTGTTGATCTTGTTCGGCATCATCGGCGATGTATTGGGCGGCGCTACCTTCAATCCCACCTGCCCTC  
GCCGCTTCTATGCCGCTGGTATTGGGGGCGCTGATTTCGCTAG**GTCTCTGCTGCCCTCCGATTTCTTGCCAGGCA**  
**TGACTTGCCTGCTCTTCATTTTTAGATTAGTCAGATATTAAACACAGTATGCAATCATCTACTGACTTGATTCA**  
**AACGGAGATTAATAAGTGGAAATTGTCTAGTTGATGATATGTTTGTGAAAATCTAGATTGCTCAGGGCTAGACTAG**  
**ATATAATGAAACTCGAGATAATAAGAATAAAAAATGAACCTCCAATTTTTTAAAAAATTCACAGATTTTAAC**  
**AACGACCAAAATTCAACAAAGGCAAACTTGAATAATGAGTTTGACACAAAATAAAGTTTCGGTACGACTAATGCGAAG**  
**CTTTGCCATAAGTTAAGTAAAGTTATGCAAGGAATGAGAATGGTAAAGCCGTTACTTGTATCCTTGACAGGCAG**  
**CTGGTGCAGTAGGTGGGGCTCTTGCAATTATGGAGGTTATGCCGATGCAGTACAAAACACATGCTTGGGGGTCCCTT**  
**CTCTGAAGGTTGACTTGCACACTGGAGCCATTGCTGAGGGAGTTTTGACGTTACGATCTCTTTTGCTGTCCCTT**  
**TCATCGTCCTTAGGGGTCCAAGCAGCCCACTTGTGAAGAATTGGTTGCTTGCCATGTCAACTGTTTCGCTAGTCG**  
**TTGCCGTTTCAAGTTATACTGGACCTTCGATGAATCCTGCAAATGTAAGTGGTGCATCTCTTTTCCGTTCTTTTG**  
**CTAGATTTTGAATAGTATAAGATGATATATCTATGTCTTATTGTAGAATATTCTAAATCCTTTAAATTCGAGA**  
**CTAAAGAAACAAAATAACATGAGGTGAGAGTTTCTCCTTCCTATAGCACAAAATGAAAAGATATCTGCCAAACAT**  
**TTTGTATTTAACTTTTTTATTTTCATATCCCAAATGCCAACTTAGAATATAGAAGTTACTTTTCCCATTGATGGTA**  
**CATGATTGTGTATCTTTTGCAATCAAAGTGAGATTGGTAATGTGATCGAGCTTTGACATTCGGAGCACAAATCAGA**  
**GTACTGTTCTCTTGACTTAATTTTTGGATTAGGAATGTGATTTGGTCCCATATTTACATTTATGGGGTCACTC**  
**ATCCCATCATTATTGTCCCGTTATGGGGTGTCAAATTATCGAGATCCTCAACTACCAGGTTTCTATATGAGAACT**  
**TTAGGAAGAATGCTACTAGATTCTATTTTCCCTCATGCACCAAACTGTAAGTAACTGATCCTCAAATGCCGTACCCCT**  
**AATTAGGACTTTGTAGCACACAGTAATACTTTTCCCTTACACTCACGTTAAATTTGTTTTGGAAGATCCATCTTT**  
**CTTTAACTTCTGATGTCTTTTCGACGTGATTGGATTTTTCTCCTTCCCTTTGGAAGAACCAATCATTTTCTTATTGA**  
**GACCCGAAAACACCAGCTTGATTAATTAACCTTTCCAATTCAAAGAGCTTTAACTTTGCTCCTTTTCTTCAATCA**  
**TGTATGTCTTCAAATAATGAATGGGACACAGTCTGTTACAAAGCCAAATAATAATTTAGACTTTGATTCATGTT**  
**TAGCTTATCTTAAAGTCTCTTTAGTTACATTTGCAAATTGCTAATCTCAAATCGTGAACATAAAATGTGCGGAGA**  
**ACTTTTGAAGCATAACTTTAACATTTTTAAGCAGTAATTAATTAGTCAAACTGCTCTCTAGATATTGGCTATAT**  
**GCCAAATTTTTAGGTAGAGTTTTAGGACATTATAAGAGTTTTGATCTGTAAGTGCAGGTCAAATTTGTTCTTTCTGT**  
**GTATTTTCTTGAATCTGGAAAGTCAAAATTTGTTCTTTGAAGTCTTATATTTGCATCTTATTTCTTGATTCTCTTC**  
**TTCCCTAATCTGACTTATCTATTCTCAAAATTTGTTAGAAGATATTTTGCAAAGTGATAGTTTTGAGCATGTGCAG**  
**TCAGAAGTTTCTTAGTGTAGAATACTTCTGATTTTCATGCCCTTCAATTAAGTTGCCAAACATAGTTTTCGGATT**  
**CTAGTTTGTGACATTTGTAATGTGGTTTACATGGGACGGCTTAGCCTCACAGAGAAAAGCTACAACCTTGAGTTT**  
**AAATCACTTTTAGTTTCCAACTACTGCAAAATGGATTTGGCTTTAGTCTGGTTTCTAGAACAAAGTTTGC**  
**TAATATCAGAACATCTTGTGCAATTCTTCTTTCTTAATTTGATATTCTCGCAAACTTGTGTTATAAATGGCT**  
**TTCAATTGTGCCTAATATCATTGCAGGCGTTTTGGGTGGGCTTATGTACATAATAAGCACAAACACATGGGAGCAAT**  
**TCTATGTTTATTGGATCTGTCCCTTCGTAGGAGCAATATTGGCTGCGTGGACATTTTCGCTTTCTATTCCCGCCCC**  
**CATCAAATCAGCACAAAGGCGAAGAAAGCC**TGA****

>**OleurSIP1;3**

**ATG**GGTGCTATTAAAGCAGCGGTAGCCGATGGGGTGCTGACTTTTATGTGGGTTTTTTGCACATCGACGTTGGGC  
GCACTCACTTTTGTGGTGGCTTCTGCTCTCGGAGTATCCCAAGGCCTACCCACTCTTTTCATCACTACTGTTCTC  
GTTTTTCTCCTGTTGATCTTGTTCGGCATCATCGGCGATGTATTGGGCGGCGCTACCTTCAATCCCACTGCCCTC  
GCCGCTTCTATGCCGCTGGTATTGGGGGCGCTGATTGCTAGTTATGCCGATGCAGTACAAACACATGCTTGGG  
GGTCCTTCTCTGAAGGTTGACTTGACACTGGAGCCATTGCTGAGGGAGTTTTGACGTTACAGATCTCTTTTGCT  
GTCCTTCTCATCGTCTTAGGGGTCCAAGCAGCCCACTTGTGAAGAATTGGTTGCTTGCCATGTCAACTGTTTCG  
CTAGTCGTTGCCGGTTCAAGTTATACTGGACCTTCGATGAATCCTGCAAATGCGTTTGGGTGGGCTTATGTACAT  
AATAAGCACAAACATGGGAGCAATTCTATGTTTATTGGATCTGTCCCTTCGTAGGAGCAATATTGGCTGCGTGG  
ACATTTGCTTTCTATTCCCGCCCCCATCAAATCAGCACAAAGGCGAAGAAAGCC**TGA**

**>OleurSIP1;3**

MGAIKAAVADGVLTFMWVCTSTLGALTFFVVASALGVSQGLPTLFITTVLVFLLLILFGIIGDVLGGATFNPTAL  
AAFYAAGIGGADSLVMPMQYKHLGGPSLKVLDLHTGAIAEGVLFTFTISFAVLLIVLRGPSSPLVKNWLLAMSTVS  
LVVAGSSYTGPSMNPANAFGWAYVHNKHNTWEQFVYVWICPFVGAILAAWTFRFLFPPPSNQHKAKKA\*

**OleurSIP1;2 Oleur061Scf0259g06030.1**

>Oleur061Scf0259:705305..709156 (+ strand) class=gene length=3852

**>OleurSIP1;2**

**ATG**AGGGCAATTAAGGTAGCAATCGCCGATGCGATAGTGACGTGCTTGTGGGTTTTTTGTGCATCGTCGTTGGGT  
GCACTCACTTTTCTGTTGTGGCTTCTGCTTTTGGGGTTAGCCAAGGCCTGCCTACGCTTTTGATCACCCTTTTCTC  
CTTTTGTCTTTTGTGTTGATTCGGATTTATTGGAGATGCGCTGGGAGGCGCCACCTTCAATCCCACAGGTCCC  
GCCGCTTTTATGCCGCGGCGTTGGAGGCACTGAGTCTCTTGTCAGCGCCGCGCTCCGCTTTCTGCTCAG**GTG**  
**ACCTCTTCTTGTACGATTCTCATGTTTCGTTTAATGGTCTATGTTATTGCTTTGCAAGATTATAAGTATTAGAAA**  
**GCAAAAAATTCAGTCGTTTTGTCTATAGCCGTAGGCCATACGTCAATAATTCAATGCTGAATCATTGATTCCAT**  
**TGGTGACGGGACATAGAATGTGGATTTTGAAGAGAGATTCAACCACTACAAAAAGATCGATTTTTCGGGATCCTT**  
**TCTTAAAGGGGAGGAAAAGGTGTAAATCAGACCAATTCGTACAATTCCTTTCTGGATATTCTTAGTGTTCCG**  
**GCTATTCATGAAATGTGAGATGATGATTGTAACCTGAGTCCAAATCCTTGACATCAAGCCGAGTGACTTTTGATCC**  
**TTGCAAGATGATTCCTGGAAATTGTATGACTCGTTTCTTCTGTACATGACGAAGATTAGATGATCATCTTGGA**  
**TTGTATGCAGGCTGCTGAGATCTTGAGATCTTGAGTGTCCAGTGGAATTTCAAATGGGCCCCCTTTTTCATAAAT**  
**ATTGTGCCCTTTAACTAACATAATAATAAAAAATTTTAAATTTTAAATTTACTATATATAACAAAAAATATTTTG**  
**TGCCCCACAACTTGAGGCCTTGTGCGGTTGCCCCACCTGCGCACCTTAGGGCCACCTCTGATTGTATGACTC**  
**GCTTGTACTTTGTAAATGACAAAGATTAGAGGATTGCTGGCATTGAAATATAGTTTAGATTGCAATATTTAAAA**  
**TTTGCAATTGCTTAAGTTCAGGCAGTTGAACACTTGATTGCTAATCTGATCATGAAGAACAATGAGGTCCAG**  
**AAGAGCTAAACGTGCTGTGAAAGAGTGGAATGAATGGATGGAAAAACCAATAGACTCTTTTGTAAAAATCGTA**  
**AATTATTTTGTGGTGTCTTGACAGGCAGCTGGTGCAGTAGGTGGTGCACCTTGGGATTCTAGAGGTTATGCCAGT**  
**GCAATACAAGCACATGCTAGATTGTCCTTCTTTGAAAGTCGATTTGAATACAGGAGCAATTGCTGAGGGAGTATT**  
**GACCTTCATAATTACCTTTGCTGTCTTTACATTGTCTCTGAGGGGCTCTACCAACCCATTTGTGAAGAATTGGTT**  
**GCTAGCTATGTCAACTGTTGCCTTAGTGTTGCAGGTTGAGTTTACTGACCTTCCATGAATCCTGCAAAAT**GT****  
**AAGTCCCATCTCTCTTTACGTTCCCTTTTGTAGATAAATCATGGGCAATTTATGGTAAATCTTGTCTTACATGCA**  
**ATGAATTTTCTTCAATCAAGTTATAAGAACTTTAGAGTGTTTCTTTGCTTAGCATAATAGCAGAAATATCCAC**  
**ACCATTATTTTGTGTTTATTTATCTTTCAAATTCCTTGTTAGATTTTATTATATTCTTTCTTAATCATGCTTCT**  
**CTCTGCATCAAAATTCGATTAAGATGCCAGGTATAGATTGATCTTTGACATCTATAAGCACAAACGAGTGATGC**  
**TTGGTGTAAACATAGATGGAAGCTAAATAACAAAAATTTAAGTTTCTTTTATTCTTAAATAGTGGTCAATGTTAA**  
**CAATTCTTTCTAGCAAAACATGCCATTAGATTATTGTCCATCAATGCTGACTGAACATATGGGATTCCACGTCCTT**  
**CTTGCTACTTAGGTGGAATGTAAGCTAGTAATGTTTTCGGCTCTTGTACTTCACCATCTATGGTGTTGCTTCGT**  
**TTAGCAGCAGGACTATTGTATTGCCGCCCCACAACACTGTTTCACAGTTGATCTATGATGGATCTGTTAGCCGCG**  
**CGCATAATTTTAAGGATCTCAATTCATTGCACTGTCTGCTTAATATTGCAATCACTCTTAATAAGCCCCCGTT**  
**TGGCCCCCATCCCTTCAAATTTAATGGTTGGAATAATTTTTTTTGAATAATGTGTTGTTGAAAAAGAATGAAAA**  
**GTTTTTGATTTGCATGTAATATTATTTTATGGAAGATTATGTAGTTGAAAAATAAGAAAAAAGAAGAAGGAGAA**  
**GGAGAATGGGAGCCAAACGGGGCCATAGTAGCAAGCTTCTCAACCACTCAATCTTTGCCATTTTCCCTAATTGCA**  
**AGCTTGCAATGACCTATTAATTCCTGCAATCCAAAACCTTGAACCTAGAGTTCTAAAAATATGATTTTCTTTAAAT**  
**TAACTTTACCTTTATGGTGCGTTTGATTGCAAGTATGAAATTTGCATAGAAAGAAAATAAATTATAGGTAATTTAA**  
**TTGCCCTAGAACTTATTTGATGAAAATTTATCAATTAAGTTGATTGATTGATTGATTGATTGATTGATTGATTG**  
**TTATACTTGTCCAATTTTTTATTGTTGTTAGATGAGAGAGTGGAATGAATAAGAAAGTGAAGGAGAAAAATTCGCT**  
**TGAAAAATAAAATCCTACTACACCTAAAGAAAAACATTTTCTTTGATTTTGAGGAAAAATATGGTCACATGACCAAA**  
**AGTAGGAAAAATGTTTTTCATGGAAAAAGTCAATCAAACAGTATAAAAGTAGGAATTTGGGTGAAAAAATACATT**  
**TTTCATGGAAAAATATTGACAATCAAACGACCCCTTAGTTTTCGATACATTATAAGTTTGAATTTAATATCACTA**  
**TAACAAACGAGCTAATCAGTCATTCAACTTTGCAACATATGTGCTGATTTTCAGAAAGTTCCATACATTGTTGT**

TTTTATCACTTGTTATTGTTCTCCTATCCCTTCTGCTTATTTTCGTGCTCTTTATCTATAAAATGGATCATATGCT  
CCTTATCATACATCTTAATCTATATCTAATATCTTTGCAGGCCTTTGGCTGGGCATATGTAAACAATACGCACAA  
AACATGGGAGCAATTCTACGTCTACTGGATCTGCCCCCTTCATTGGAGCAATATTAGCTGCGTGGGTTTTCCGTTT  
TCTATTTCCGCCTCCTCCAGTCAAGAAGCAGAAGAAAGCC**TGA**

**>OleurSIP1;2**

**ATG**AGGGCAATTAAGGTAGCAATCGCCGATGCGATAGTGACGTGCTTGTGGGTTTTTTGTGCATCGTCGTTGGGT  
GCACTCACTTTTCGTTGTGGCTTCTGCTTTTGGGGTTAGCCAAGGCCTGCCTACGCTTTTGATCACCACCTTTTCTC  
CTTTTTGTTCTTTTGTGTTGATTTCGGATTTATTGGAGATGCGCTGGGAGGCGCCACCTTCAATCCCACAGGTCCC  
GCCGCCTTTTATGCCGCCGGCGTTGGAGGCACTGAGTCTCTTGTGACGCGCCGCTCCGCTTTTCTGCTCAGGCA  
GCTGGTGCAGTAGGTGGTGCACCTTGGGATTCTAGAGGTTATGCCAGTGCAATACAAGCACATGCTAGATTGTCTT  
TCTTTGAAAGTCGATTTGAATACAGGAGCAATTGCTGAGGGAGTATTGACCTTCATAATTACCTTTGCTGTCTT  
TACATTGTCTGAGGGTCTTACCAACCCATTTGTGAAGAATTGGTTGCTAGCTATGTCAACTGTTGCCTTAGTG  
GTTGCAGGTTTCGAGTTATACTGGACCTTCCATGAATCCTGCAATGCCTTTGGCTGGGCATATGTAAACAATACG  
CACAAAACATGGGAGCAATTCTACGTCTACTGGATCTGCCCCCTTCATTGGAGCAATATTAGCTGCGTGGGTTTTC  
CGTTTTCTATTTCCGCCTCCTCCAGTCAAGAAGCAGAAGAAAGCC**TGA**

**>OleurSIP1;2**

MRAIKVAIADAIVTCLWVFCASSLGALTFFVVASAFGVSQGLPTLLITTFLLFVLLFVFGFIGDALGGATFNPTGP  
AAFYAAGVGGTESLVSAAVRFPQAAGAVGGALGILEVMPVQYKHMLDPSLKVDLNTGAIAEGLVTFIITFAVL  
YIVLRGPTNPFFVKNWLLAMSTVALVVAGSSYTGPSMNPANAFGWAYVNNTHKTWEQFYVYWCPIGAILAAWVF  
RFLFPPPPVKKQKKA\*

## **OleurSIP2;1 Oleur061Scf0186g06043.1**

**>Oleur061Scf0186:651945..657348 (- strand) class=gene length=5404**

**>OleurSIP2;1**

**ATG**GCTGCCGTAGGAGGAAGGCTGCTGCTAGTGTCGGATTTCTTTATGTGCTTCATGTGGGTTTGGTCTAGCGTG  
CTTATCAAGATTTTTGTGTATAAAATATTGGGCTATGGCACCCATGATTTGAAGGGTGAAATTCTGAGGTATGGA  
ATCTCCATTGTCAACATGTTCTTTTGCATACTTGGCCAAAGCCACCAAGGGTGGGGCTACAACCCCTCACC  
ATCTTGTCCTCCGCCATTTCTGGGGATTTTCTCTTCACTGTGCGGGCCAGAATTCCTATCCAG**GTT**  
**CGCTGAGTGCAAATGTTTTAACTCTTGTCTCTAATTATTATGCTATTTTTCGTTTTAGGAAACATTGTGGCTC**  
**GATAAATTTGGCGATTGATGCGTGTAATTATGTGCATAAATTGACGTTTTGTTTGGTGTGACATTGAATTAGAGA**  
**AATTCGATGATTCTTCTCTTTATTTTTCAGGAATGCTTGCTTTTGGGTTGCTCGTAAATTCGATTAGGGCAT**  
**GCAATAAATCTCTGAGTTTAAGCCAAAATTTCTATTTCTTTTTTGGAAATTGAATTGATCTAATATCTAAAACC**  
**TTATACAGTGTAGGTAGGTAAAAGTAATTTTATTACTGAAAGAGCTTAAGAAATTTAGGGATTTGACCTTGAAAAG**  
**AAGATTATTCTCAGTTAATGTTAGTTAAGCTAAATCTTGTGGTAAAAAACAAGTCTCATTGCCATATATTCAAG**  
**ACTTATTCTCAGTTAATAATTTATGAAAAGTATGTTGTTTGTGATTGATTGTATGAACTAAAGATTGCAA**  
**TATGATTAAGAGGTCTAAGTTACAATACTGTACTTGTGGAAGAAGTGGGACAGTGGAGATATCTTGTAGTTTGG**  
**CAAATCCTTTGCTGATAATTCTGTAGAACCAGCTCCATGTACAGGACTTTCTAATTCTGTATCTACGTGTAGGA**  
**CTTTCTTATTGAGGTTTCTAATTTGGAATTGTTCTCAACTAGTCGAATTCCTTTTACCACATACTTTTTGTTC**  
**ATTATCTTCTTATTTAGCCCCGTTTGATGGGCTTTTCTTCAAAACTCTTTTATCTATATACTCATTTTCATCCAC**  
**ACATTACACAATAAAATATTATGTACATAAACTCAAACTTTTCTTACTTTTTAATTATACATTCTCCAAAAA**  
**TTCACTATTCAAAGCATTATTTTTCCCAAATAATGGCCATCAATCAGGGGCTTAGAGAACATCCCTTTCCCGTG**  
**TTGTCACTGCTGCAGTGCTTCTAGTTTCTTATCTCTCAGAGAGGTTATGAAGAGTAGTAATTTCAAACTCAT**  
**AGTTTATTCTAATCGTCTAATAGTCGTCTGGAATAAAAGACTCGTCATGCTTTTTAAATGACTCTCGAAGTT**  
**GAGTTAAAGATGATTTAGGCTCTGTTTGTGTTTCCATTCTTTTTCCATTAAATGAAAAATATGACCGTTATCCAT**  
**CACATCAAGGCACCAAATTTGAATTTCTATCTCTTGTGTGGGGTCATAACGACTATATTTTTCATTTTTCATTTTT**  
**GCAAAAATAAGAAACAAACGCCCCCTTAGTTTTTTTACCCGCGCTTACCCTTATTTTTGTCTTCCATCTCTCTT**  
**TTAAAGTCTTGGGGTCTATTTATGGAGTTAGGTTTCACTCTCGCGGCATTTCTGAAATAGGACGTGGGCCACGT**  
**CTGAATGTTGACATAGCTCGAGGTGCATTGACTGAAGGTCTTTTGACATTTGGGATTGTGATTATATCCCAAGGG**  
**CTCTCGAGAAAAATTTCCGGAAGTTTCTTCATGAAGACTTGGATCTCCAGCGTCTCAAAGCTCACTCTTCACATA**  
**CTCGGCTCTGATCTGACTGGAGGATGCATGAATCCAGCCTCTGTAAGTACTTAATAATCATTCTATGCATAATCT**  
**CTGTTTACTGCCGAATTTTGTGGATGCACACTGAGTAAAATTTTAATTGCATCTCCCAGGTAATGGGGTGGGCT**  
**TTTGACACGAGAACATATAAGCAAGGAGCATTTAATTGTGTACTGGCTTGCTCCTATGGAGGCAACTTTGGCA**  
**GCAGTGTGGGCATTTAGACTGATAGTTTACGCCAAGAAGGACGAGACACTAAAGGCGAAGTCCGTAAAAATCAGAT**  
**TGA**

**>OleurSIP2;1**

**ATG**GCTGCCGTAGGAGGAAGGCTGCTGCTAGTGTCGGATTTCTTTATGTGCTTCATGTGGGTTTGGTCTAGCGTG  
CTTATCAAGATTTTTGTGTATAAAATATTGGGCTATGGCACCCATGATTTGAAGGGTGAAATTCTGAGGTATGGA  
ATCTCCATTGTCAACATGTTCTTTTGCATACTTGGCCAAAGCCACCAAGGGTGGGGCTACAACCCCTCACC  
ATCTTGTCCTCCGCCATTTCTGGGGATTTTCTCTTCACTGTGCGGGCCAGAATTCCTATCCAGGCT

TTGGGGTCTATTTATGGAGTTAGGTTTCATTCTCGCGGCATTTCTCTGAAATAGGACGTGGGCCACGTCTGAATGTT  
GACATAGCTCGAGGTGCATTGACTGAAGGTCTTTTGACATTTGGGATTGTGATTATATCCCAAGGGCTCTCGAGA  
AAAATTTCCCGGAAGTTTCTTCATGAAGACTTGGATCTCCAGCGTCTCAAAGCTCACTCTTCACATACTCGGCTCT  
GATCTGACTGGAGGATGCATGAATCCAGCCTCTGTAATGGGGTGGGCTTTTGACACGGGAGAACATATAAGCAAG  
GAGCATTTAATTGTGTACTGGCTTGCTCCTATGGAGGCAACTTTGGCAGCAGTGTGGGCATTTAGACTGATAGTT  
CAGCCCAAGAAGGACGAGACACTAAAGGCGAAGTCCGTAATAATCAGAT**TGA**

**>OleurSIP2;1**

MAAVGGRRLLLVSDFFMSFMWVWSSVLKIFVYKILGYGTHDLKGEILRYGISIVNMFFFAYLAKATKGGAYNPLT  
ILSSAISGDFSNFLFTVGARIPIQVLGSIYGVRFILAAPEIGRGPRLNVDIARGALTEGLLTFGIVIIISQGLSR  
KIPGSFFMKTWISSVSKLTLHLGSDLTGGCMNPASVMGWAFHGEHISKEHLIVYWLAPMEATLAAVWAFRLIV  
QPKKDETLKAKSVKSD\*

## **OleurSIP2;2 Oleur061Scf8348g02016.1**

>Oleur061Scf8348 Oleur061Scf8348:245169..250426 (- strand) class=gene  
length=5258

**>OleurSIP2;2**

**ATG**GCGGCCGTAAGAGGTAGGCGGCTGCTGGTGTCTGGATTTCTTGATGTCTTTCATGTGGGTTTGGTCCAGTGTG  
CTCATTAAGATTTTGTGTTTATAAAATATTGGATTATGGCTCCCATGATATGAAGGGTGAAATTTTGAGGTATGGA  
ATCTCCATTGTCAACATGTTCTTCTTTGCATTCTTGGCCAAAGCTACCAAGGGTGGGGCCTACAACCCCTCACC  
GTCTTGCTCCTCGGCCATTTCTGGGAATTTTCAGCAATTTCTCTTCTCACTGTCTGGGGCCAGAATTCCTGTCCAG**GT**  
**CGCTAGATACAATTGTTTTAAATCTTGTTCTTTAATTATCATGTCAACGTTTGTTTTAGGAAATATTGACAGTT**  
**TCTTTTGTGAGGGACATTGAATTAGAGAAGTTAGATTGATGGTTCTTCTCTTTATTTTAGGACTTCATGTTTTTG**  
**GGTTAATCGTAAATTTGATTAGGGCCTGCATCTTAAATCAATCTGGGAGTTTCAGTAAATACGTTCTATTGATTA**  
**TTTGGAAGTGAATTGATAGATAATCTGAAACCATATACATGGTAGGCTTAGTGAAAGCAGCAATTTCAATGATT**  
**GTCACATGTTATTGGAATATCTTAAGAATCATTCAAAAATCGAAGAAATGATCAAAACAAAATGATTTTTGAATT**  
**GTATTCCAGAAAAATTTTATTACAAATAAACTATATCTCGTTATCTTGGCAAATTATTTGAGGCTAATTATAT**  
**ATCTGCATGTAGGACTTTCTTTCTTATCCAAGATTCCCCCAATTCGACATCTTTCTCAAATATCAACTATAAAAA**  
**ATTCTTTCCCACTTACTTTGTGTTCCAATATCTATACTTATTTAGAGAGTTTCCCTTTTTCCCATTTTGTTAAT**  
**GCTGACACGATGAATGGATCGTTGTTCTCCAGAAAAACCTCAGACAGGTTGTGAAGAGGAATGACATGGTGTTC**  
**TTAAATAAGTGTTCCAAAACCTCATAGTTTATTTCATAATCATCAGCTGGAAGTTGAGTTAAGATGGTTTAGTTGT**  
**TTACTGGAGCTTATCCTTGTTCTTCCATTTCTTTTCAAAGGTCTTGGGGTCTATTTATGGGGTCAGGCTCATTC**  
**TTGCGGCATTTCCAGAAATAGGACGTGGGCCACGTCTGAATGTTGACATAACTCGAGGTGCATTGACTGAAGGGT**  
**TTTTGACGTTTGGAATTGTAATTATATCCCAAGGGCTCTCGAGAAAACCTTCTGGAAGTTTCTTCATGAAGACTT**  
**GGATCTCAAGCGTCTCGAAGCTCACTCTTCACATGCTTGGCTCTGATCTGACTGGAGGATGCATGAATCCGGCAT**  
**CTGTAAGTACTTATATTTCAGTCTAAATGTAATCTATGCTTACTGCGGAATTGTGTTGGATACATTACACTTGAAT**  
**GAACATCGAGTAAATTCTAATTGCGTCCCTCAGGTAATGGGGTGGGCTTTTACACGCGGGGAACATATAAGCAAG**  
**GAACATTTAATTGTATACTGGCTTGCTCCTATGGAGGCGACTTTGGCAGCAGTGTGGGCATTTAGAGTTGTAGTT**  
**CGACCCGAGAATGATAAGACACCTAAGGTGAAGTCCGGAATAATCAGAA**TGA****

**>OleurSIP2;2**

**ATG**GCGGCCGTAAGAGGTAGGCGGCTGCTGGTGTCTGGATTTCTTGATGTCTTTCATGTGGGTTTGGTCCAGTGTG  
CTCATTAAGATTTTGTGTTTATAAAATATTGGATTATGGCTCCCATGATATGAAGGGTGAAATTTTGAGGTATGGA  
ATCTCCATTGTCAACATGTTCTTCTTTGCATTCTTGGCCAAAGCTACCAAGGGTGGGGCCTACAACCCCTCACC  
GTCTTGCTCCTCGGCCATTTCTGGGAATTTTCAGCAATTTCTCTTCACTGTCTGGGGCCAGAATTCCTGTCCAGGTC  
TTGGGGTCTATTTATGGGGTCAGGCTCATTTCTTGCGGCATTTCCAGAAATAGGACGTGGGGCCACGTCTGAATGTT  
GACATAACTCGAGGTGCATTGACTGAAGGGTTTTTGACGTTTGGAATTGTAATTATATCCCAAGGGCTCTCGAGA  
AAACTTCTGGAAGTTTCTTCATGAAGACTTGGATCTCAAGCGTCTCGAAGCTCACTCTTCACATGCTTGGCTCT  
GATCTGACTGGAGGATGCATGAATCCGGCATCTGTAATGGGGTGGGCTTTTACACGCGGGGAACATATAAGCAAG  
GAACATTTAATTGTATACTGGCTTGCTCCTATGGAGGCGACTTTGGCAGCAGTGTGGGCATTTAGAGTTGTAGTT  
CGACCCGAGAATGATAAGACACCTAAGGTGAAGTCCGGAATAATCAGAA**TGA**

**>OleurSIP2;2**

MAAVRGRLLLVSDFLMSFMWVWSSVLKIFVYKILDYGSMDKGEILRYGISIVNMFFFAFLAKATKGGAYNPLT  
VLSSAISGNFSNFLFTVGARIPVQVLGSIYGVRILILAAPEIGRGPRLNVDITRGALTEGFLTFGIVIIISQGLSR  
KLPGSFFMKTWISSVSKLTLHMLGSDLTGGCMNPASVMGWAFTRGEHISKEHLIVYWLAPMEATLAAVWAFRVVV  
RPENDKTPKVKSSE\*
