# Supplementary material for: Genome Wild Analysis and Molecular Understanding of the Aquaporin Diversity in Olive Trees (Olea Europaea L.)
Source: MDPI journal article supplement (doi:10.3390/ijms21114183), 2020-06-11
Supplement: s1 [file s1]

**Figure S5 ABCDE.** Amino acid sequence alignments per subfamily of the *Oeu*AQPs members from *Olea europaea* var. *sylvestris*. 5A, PIP; 5B, TIP; 5C, XIP; 5D, NIP; 5E, SIP. Legends are detailed at the end of each subfamily alignment.

|            |            |          |                         |       |              |           |                    |                        |                        |                    |            |          |          |
|------------|------------|----------|-------------------------|-------|--------------|-----------|--------------------|------------------------|------------------------|--------------------|------------|----------|----------|
|            |            | 10       | 20                      | 30    | 40           | 50        | 60                 | 70                     | 80                     | 90                 | 100        | 110      |          |
|            |            |          |                         | *     |              |           |                    |                        |                        |                    |            |          |          |
| AtPIP1;1   |            | -----    | MEGKEEDVRVGANKFPERQPIG  | ----  | TSAQS-DKDYK  | KEPPAPFF  | EPGELSSWSFWRAGI    | AEFIATFLFLYITVLTVMGVK  | RSPN-----              | MCASVGIQGI         |            |          |          |
| SlPIP1;1   |            | -----    | MAENKEEDVNLGANKFREPQPIG | ----  | TSAQT-DKDYK  | KEPPAPPLY | EPGELSSWSFYRAGI    | AEFMATFLFLYITILTVMGLK  | RSDS-----              | LCSSVGIQGV         |            |          |          |
| OeuPIP1;1a | Oeu0388001 | -----    | MESKEEDVRVGANKFAERQPIG  | ----  | TAAQSQDKDYK  | KEPPAPLFE | EPGELSSWSFYRAGI    | AEFIATFLFLYITVLTVMGVSK | SDS-----               | KCKTVGIQGI         |            |          |          |
| OeuPIP1;1b | Oeu0388011 | -----    | MESKEEDVRVGANKFAERQPIG  | ----  | TAAQSQDKDYK  | KEPPAPLFE | EPGELSSWSFYRAGI    | AEFIATFLFLYITVLTVMGVSK | SDS-----               | KCKTVGIQGI         |            |          |          |
| OeuPIP1;1c | Oeu0388022 | -----    | MESKEEDVRVGANKFAERQPIG  | ----  | TAAQSQDKDYK  | KEPPAPLFE | EPGELSSWSFYRAGI    | AEFIATFLFLYITVLTVMGVSK | SDS-----               | KCKTVGIQGI         |            |          |          |
| OeuPIP1;2  | Oeu0181331 | -----    | MESKEEDVRVGANKFNERQPIG  | ----  | TAAQSQDKDYK  | KEPPAPLFE | EPGELSSWSFYRAGI    | AEFIATFLFLYITILTVMGVSK | SDS-----               | KCSTVGIQGI         |            |          |          |
| OeuPIP1;4  | Oeu0529541 | -----    | MESKEEDVRLGANKFTERQPIG  | ----  | TSAQS--      | KDYK      | KEPPAPLFE          | EPGELSSWSFYRAGI        | AEFIATFLFLYITILTVMGVSR | SGS-----           | KCASVGIQGI |          |          |
| OeuPIP1;6  | Oeu0463501 | -----    | MEGKEEDVRLGANKFTERQPIG  | ----  | TSAQS--      | KDYK      | KEPPAPLFE          | EPGELQSWFWRAGI         | AEFMATFLFLYITILTVMGVSR | SNS-----           | KCTSVGIQGI |          |          |
| OeuPIP1;3  | Oeu0423291 | -----    | MAESKEEDVKLGANKFTEKQPIG | ----  | TAAQT-DKDYK  | KEPPAPLFE | EPGELTSSWSFYRAGI   | AEFIATFLFLYISILTVMGVF  | SAKN-----              | KCASVGVQGI         |            |          |          |
| OeuPIP1;5  | Oeu0613842 | -----    | MAENREEDVRLGANKFTEKQPIG | ----  | TAAQT-DKDYK  | KEPPAPLFE | EPGEIKSWSFYRAGI    | AEFVATFLFLYITILTVMGVGR | SNS-----               | KCASVGIQGI         |            |          |          |
| AtPIP2;1   |            | -----    | MAKDV                   | ---   | AVPGE        | EGFTKDYQ  | DDPPAPFDG          | AELTKWSFYRAVIAEF       | VATLLFLYITVLTVIGYKIQ   | SDTDAG--           | GVD        | CGGVILGI |          |
| SlPIP2;1   |            | MVRHEWLK | ESTRAKKQRQPKKKTETQ      | KWAKI | WRLVLNMQKTYQ | DDPPAPLID | PEELGKWSFYRAI      | IAEFVATLLFLYITVLTVIGYK | QSST----               | DQ                 | CGGVILGI   |          |          |
| OeuPIP2;1  | Oeu0012711 | -----    | MTKDV                   | ---   | SHVEPA       | EEYS      | AKDYH              | DDPPAPLID              | FEELSSWSFYRALIAEF      | VATLLFLYITVLTVIGYK | QIDPAHG--  | GDD      | CGGVILGI |
| OeuPIP2;2  | Oeu0301831 | -----    | MTKDV                   | ---   | SHGEP        | AE-FA     | KDYH               | DDPPAPLID              | FEELSSWSFYRALIAEF      | VATLLFLYITVLTVIGYK | QIDPAHG--  | GDD      | CGGVILGI |
| OeuPIP2;3  | Oeu0338421 | -----    | MVKDGG                  | ---   | VAEHGS       | FTVKDYH   | DDPPAPLID          | AAELTKWSFYRAI          | IAEFVATLLFLYITVLTVIGYK | QTD                | TNAGHGGDQ  | CGGVILGI |          |
| OeuPIP2;4  | Oeu0304391 | -----    | MAKDAG                  | ---   | VAEHGS       | FAAKDYQ   | DDPPAPLID          | AAELTKWSFYRAVIAEF      | VATLLFLYITVLTVIGYK     | QID                | TTVGHGGDQ  | CGGVILGI |          |
| OeuPIP2;6  | Oeu0172571 | -----    | MTKDAG                  | ---   | VAEHGS       | FTTKDYH   | DDPPAPLID          | AAELTKWSFYRAI          | IAEFVATLLFLYITVLTVIGYK | QTD                | PDLK--     | GDD      | CGGVILGI |
| OeuPIP2;11 | Oeu017254  | -----    | MKDVG                   | ---   | VANHS        | FMAKDYH   | DDPPAPLID          | TEELTKWSFYRALIAEF      | VATLLFLYITVLTVIGYK     | SHL                | DTLK--     | GDD      | CGGVILGI |
| OeuPIP2;5  | Oeu0279871 | -----    | MDIE                    | ---   | VGA-EY       | TTKDYQ    | DDPPAPLID          | PEELTKWSFYRALIAEF      | VATLLFLYITVLTVIGYK     | SESAA--            | DK         | CGGVILGI |          |
| OeuPIP2;7  | Oeu0181111 | -----    | MVDV                    | ---   | VGGP         | EFITKDYQ  | DDPPAPLID          | PEELTKWSFYRAI          | IAEFVATLLFLYITVLTVIGYK | QSAT--             | DE         | CGGVILGI |          |
| OeuPIP2;8  | Oeu0232321 | -----    | MSKEVT                  | ---   | EEGQV        | HPHGKDY   | EDPPAPLLD          | MGELMLWSFYRAI          | IAEFVATLLFLYITVATVIGH  | KKLNAA--           | DQ         | CGGVILGI |          |
| OeuPIP2;9  | Oeu0201061 | -----    | MTKEVS                  | ---   | EEGQV        | HHHGKDY   | VDDPPAPLLD         | MGELKLWSFYRALIAEF      | VATLLFLYITVATVIGH      | KKLNAA--           | DQ         | CGGVILGI |          |
| OeuPIP2;10 | Oeu022438  | -----    | MENHV                   | GVA   | KDYR         | DPLPAPLID | GLMELTKWSFYRAVIAEF | VATLLFLYITVLTVIGYK     | QNDTH--                | CG                 | GGVILGI    |          |          |
|            |            |          |                         |       |              | *         |                    |                        |                        |                    |            |          |          |
|            |            |          |                         |       |              |           |                    |                        |                        |                    |            |          |          |

|            |            |     |     |     |           |                           |     |     |         |                  |                          |                           |
|------------|------------|-----|-----|-----|-----------|---------------------------|-----|-----|---------|------------------|--------------------------|---------------------------|
|            |            | 120 | 130 | 140 | 150       | 160                       | 170 | 180 | 190     | 200              | 210                      | 220                       |
| AtPIP1;1   |            |     |     |     | AWAFGGMIF | ALVYCTAGISGGHINPAVTFGLFLA | KFL | LT  | ALFYIV  | MQCLGAICGAGVVKGF | PKQYQALGGGANVVAHGYTKG    | SGLGAEIIGTFVLVYTVFSATDAKR |
| SlPIP1;1   |            |     |     |     | AWAFGGMIF | ALVYCTAGISGGHINPAVTFGLFLA | KFL | LT  | AVFYVMV | MQCLGAICGAGVVKGF | MQGPYQRLGGGANVVPQGYTKGD  | LGAEIIGTFVLVYTVFSATDAKR   |
| OeuPIP1;1a | Oeu0388001 |     |     |     | AWAFGGMIF | ALVYCTAGISGGHINPAVTFGLFLA | KFL | LT  | AVFYVMV | MQCLGAICGAGVVKGF | PKTLMTKGGGANVVAHGYTKGD   | LGAEIIGTFVLVYTVFSATDAKR   |
| OeuPIP1;1b | Oeu0388011 |     |     |     | AWAFGGMIF | ALVYCTAGISGGHINPAVTFGLFLA | KFL | LT  | AVFYVMV | MQCLGAICGAGVVKGF | PKTLMTKGGGANVVAHGYTKGD   | LGAEIIGTFVLVYTVFSATDAKR   |
| OeuPIP1;1c | Oeu0388022 |     |     |     | AWAFGGMIF | ALVYCTAGISGGHINPAVTFGLFLA | KFL | LT  | AVFYVMV | MQCLGAICGAGVVKGF | PKTLMTKGGGANVVAHGYTKGD   | LGAEIIGTFVLVYTVFSATDAKR   |
| OeuPIP1;2  | Oeu0181331 |     |     |     | AWAFGGMIF | ALVYCTAGISGGHINPAVTFGLFLA | KFL | LT  | AVFYVMV | MQCLGAICGAGVVKGF | PKTLMTKGGGANVVAHGYTKGD   | LGAEIIGTFVLVYTVFSATDAKR   |
| OeuPIP1;4  | Oeu0529541 |     |     |     | AWAFGGMIF | ALVYCTAGISGGHINPAVTFGLFLA | KFL | LT  | AVFYIV  | MQCLGAICGAGVVKGF | PSFYKANGGGANVVAHGYTKGD   | LGAEIIGTFVLVYTVFSATDAKR   |
| OeuPIP1;6  | Oeu0463501 |     |     |     | AWAFGGMIF | ALVYCTAGISGGHINPAVTFGLFLA | KFL | LT  | AVFYIV  | MQCLGAICGAGVVKGF | PSFYKANGGGANVVAHGYTKGD   | LGAEIIGTFVLVYTVFSATDAKR   |
| OeuPIP1;3  | Oeu0423291 |     |     |     | AWAFGGMIF | ALVYCTAGISGGHINPAVTFGLFLA | KFL | LT  | ALFYVMV | MQCLGAICGAGVVKGF | FMKGQYERLQGGANIVQHGYTKGD | ALGAEIIGTFVLVYTVFSATDAKR  |
| OeuPIP1;5  | Oeu0613842 |     |     |     | AWAFGGMIF | ALVYCTAGISGGHINPAVTFGLFLA | KFL | LT  | AVFYIV  | MQCLGAICGAGVVKGF | MEGPYQRLQGGANVVAHGYTKGD  | LGAEIIGTFVLVYTVFSATDAKR   |
| AtPIP2;1   |            |     |     |     | AWAFGGMIF | ILVYCTAGISGGHINPAVTFGLFLA | KFL | LT  | AVFYIV  | MQCLGAICGAGVVKGF | QSSYTRYGGGANSLADGYSTGT   | GLAEIIGTFVLVYTVFSATDAKR   |
| SlPIP2;1   |            |     |     |     | AWAFGGMIF | ILVYCTAGISGGHINPAVTFGLFLA | KFL | LT  | AVFYIV  | MQCLGAICGAGVVKGF | QKAYYVKYGGGANLNDGYSTGT   | GLAEIIGTFVLVYTVFAATDPKR   |
| OeuPIP2;1  | Oeu0012711 |     |     |     | AWAFGGMIF | ILVYCTAGISGGHINPAVTFGLFLA | KFL | LT  | AVFYIV  | MQCLGAICGAGVVKGF | QKSYHYKYGGANLAPGYNKG     | VLGAEIIGTFVLVYTVFSATDPKR  |
| OeuPIP2;2  | Oeu0301831 |     |     |     | AWAFGGMIF | ILVYCTAGISGGHINPAVTFGLFLA | KFL | LT  | AVFYIV  | MQCLGAICGAGVVKGF | QKSYHYKYGGANLAPGYNKG     | VLGAEIIGTFVLVYTVFSATDPKR  |
| OeuPIP2;3  | Oeu0338421 |     |     |     | AWAFGGMIF | ILVYCTAGISGGHINPAVTFGLFLA | KFL | LT  | AVFYIV  | MQCLGAICGAGVVKGF | QKSYHYKYGGANLADGYSTG     | VGLSAEIIGTFVLVYTVFSATDPKR |
| OeuPIP2;4  | Oeu0304391 |     |     |     | AWAFGGMIF | ILVYCTAGISGGHINPAVTFGLFLA | KFL | LT  | AVFYIV  | MQCLGAICGAGVVKGF | QKSHYKYGGANLADGYSTG      | VGLSAEIIGTFVLVYTVFSATDPKR |
| OeuPIP2;6  | Oeu0172571 |     |     |     | AWAFGGMIF | ILVYCTAGISGGHINPAVTFGLFLA | KFL | LT  | AVFYIV  | MQCLGAICGAGVVKGF | QKSYHYKYGGANLADGYSTG     | VGLSAEIIGTFVLVYTVFSATDPKR |
| OeuPIP2;11 | Oeu017254  |     |     |     | AWAFGGMIF | ILVYCTAGISGGHINPAVTFGLFLA | KFL | LT  | AVFYIV  | MQCLGAICGAGVVKGF | QKSYHYKYGGSNELAEGYSTSV   | GLS--IGTFVLVYTVFSATDPKR   |
| OeuPIP2;5  | Oeu0279871 |     |     |     | AWAFGGMIF | ILVYCTAGISGGHINPAVTFGLFLA | KFL | LT  | AVFYIV  | MQCLGAICGAGVVKGF | QKSYHYKYGGANLADGYSTG     | TGLAEIIGTFVLVYTVFSATDPKR  |
| OeuPIP2;7  | Oeu0181111 |     |     |     | AWAFGGMIF | ILVYCTAGISGGHINPAVTFGLFLA | KFL | LT  | AVFYIV  | MQCLGAICGAGVVKGF | QRAYYVRYGGGANLADGYSTG    | TGLAEIIGTFVLVYTVFSATDPKR  |
| OeuPIP2;8  | Oeu0232321 |     |     |     | AWAFGGMIF | ILVYCTAGISGGHINPAVTFGLFLA | KFL | LT  | AVFYIV  | MQCLGAICGAGVVKGF | QKSYHYKYGGANLADGYSTG     | TGLAEIIGTFVLVYTVFSATDPKR  |
| OeuPIP2;9  | Oeu0201061 |     |     |     | AWAFGGMIF | ILVYCTAGISGGHINPAVTFGLFLA | KFL | LT  | AVFYIV  | MQCLGAICGAGVVKGF | QKSYHYKYGGANLADGYSTG     | TGLAEIIGTFVLVYTVFSATDPKR  |
| OeuPIP2;10 | Oeu022438  |     |     |     | AWAFGGMIF | ILVYCTAGISGGHINPAVTFGLFLA | KFL | LT  | AVFYIV  | MQCLGAICGAGVVKGF | QKSHYKYGGSNELSDGYSTG     | GLAEIIGTFVLVYTVFSATDAKR   |
|            |            |     |     |     |           |                           |     |     |         |                  |                          |                           |
|            |            |     |     |     |           |                           |     |     |         |                  |                          |                           |

---TM2---
 -NPA;LB-
-----TM3-----
-----TM4-----

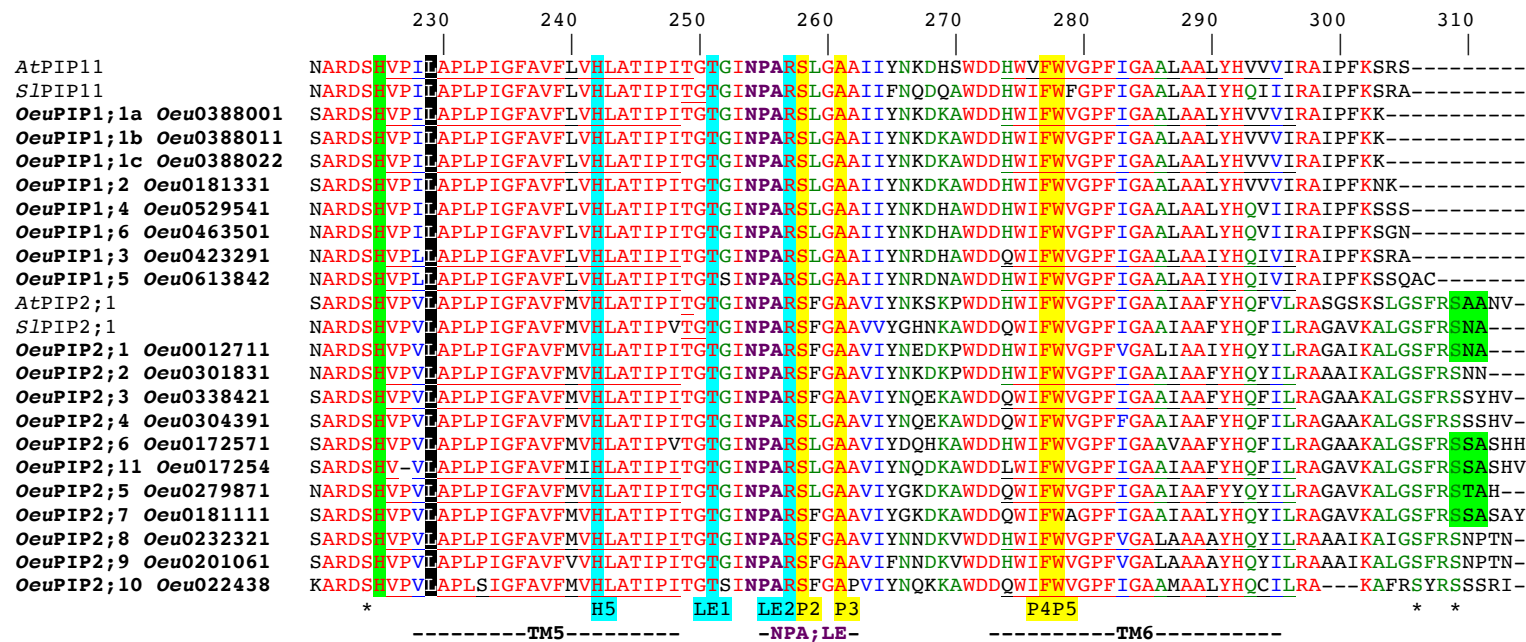

**Figure S5A. Amino acid sequence alignment of the *OeuPIPs* subfamily members from *Olea europaea* var. *sylvestris*.** *SlPIP1*;1 and *SlPIP2*;1 (Soly10g054840.1; Reuscher et al., 2013) from Tomato and *AtPIP1*;1 (At3g61430) and *AtPIP2*;1 (At3g53420) (Muries et al., 2011) from *Arabidopsis thaliana* were used as references. The highest residue similarities between MIP members are shown in red (100%), and green (>80%). Residues with similar physicochemical behaviors are shown in blue. The six transmembrane domains (TMH1-6) and the two hemi-helicoidal regions that include the «NPA» motives «NPA1» (in Loop B) and «NPA2» (in Loop E) (framed in purple) are underlined. The amino acids residues constituting the ar/R constriction region are shown with blue highlights and labeled H2, H5, LE1 and LE2, and residues constituting the Froger's positions are shown with yellow highlights and labeled P1 to P5. In addition, AEF motif, the His residue involved in gating, the RKxSxxR motif, the SxA motif for putative phosphorylation by PKC are marked in green, the KdvE motif for putative conserved methylation sites are marked in red, and the putative conserved blocking residue (L) is marked in black. Lastly, the Cysteines (C) involved in the tetramerization of PIPs are mentioned in purple. Columns or regions with conserved putative phosphorylation sites are marked with an asterisk.

|           |            |       |                                    |                                           |                                                     |                                    |    |    |    |    |
|-----------|------------|-------|------------------------------------|-------------------------------------------|-----------------------------------------------------|------------------------------------|----|----|----|----|
|           |            | 10    | 20                                 | 30                                        | 40                                                  | 50                                 | 60 | 70 | 80 | 90 |
| AtTIP1;2  |            | ----- | MPTRNIAIGGVQE                      | EVYHPNALRAALAEFISTLI                      | FVFAGSGSGIAFNKITDNGATT                              | PSGLVAAALAHAFGLFVAVSVGANISGG       |    |    |    |    |
| SlTIP1;1  |            | ----- | MPINQITIGS-HEELRHPGALKAAALAEFISTLI | FVFAGQSGMAFNKLT                           | DGVAT-PAGLISASIAHAFGLFVAVSVGANISGG                  |                                    |    |    |    |    |
| OeuTIP1;3 | Oeu0354791 |       | MSSEFFNVPLRRVAFGH-RDEFRQPGA        | KAALAEFFSTLI                              | FVFAGEGSGMAYNKLTGNAPTSP                             | PSGLVAAAVAHGFALFVAVSVGANISGG       |    |    |    |    |
| OeuTIP1;1 | Oeu0585311 |       | -----                              | MPISRVAIGS-PAEFSQLDAIKAAVAEFISMLI         | FVFAGQSGMAFAKLT                                     | DNESTTPAGLIAASIAHAFALFVAVSVGANISGG |    |    |    |    |
| OeuTIP1;4 | Oeu0402901 |       | -----                              | MPISRIVAGS-LAEASQPEALKATLAEFISMLI         | FVFAGEGSGMAFAKLT                                    | TNNGSTTPTGLIAEAIHAFALFVAVSVGANISGG |    |    |    |    |
| OeuTIP1;5 | Oeu0402891 |       | -----                              | MPISRIVAGS-LAEASQPEALKATLAEFISMLI         | FVFAGEGSGMAFAKLT                                    | TNNGSTTPTGLIAEAIHAFALFVAVSVGANISGG |    |    |    |    |
| OeuTIP1;2 | Oeu0410141 |       | -----                              | MPFSRISVGS-PAEASHPDTLKAAALAEFISMLI        | FVFAGEGSGMAFAKLT                                    | DGGSSTPAGLIAAAIAHAFALFVAVSVGANISGG |    |    |    |    |
| OeuTIP1;6 | Oeu0332441 |       | -----                              | MPIYRIAIGT-PGEASHPDALKAAALAEFFSMLI        | FVFAGQSGMAFNKLSNDGSPNPSGLLAAALAHAFALFVAVSVGANISGG   |                                    |    |    |    |    |
| OeuTIP1;7 | Oeu0452371 |       |                                    | MYSNSM-RSGNQIAVGR-LEEATQQDALKAAALAEFISTLI | FVFAGSGSGMAFNKLT                                    | DDGATTAGLIAAAVAHAFALFVAVSVGANISGG  |    |    |    |    |
| OeuTIP2;1 | Oeu0240741 |       | -----                              | MPAIAVGR-LDDSF SIGSLKAYVAEFISTLL          | FVFAGVGSIAIAYNKLTADAALDPAGLVAVAICHGFALFVAVSIGANISGG |                                    |    |    |    |    |
| OeuTIP2;2 | Oeu0240761 |       | -----                              | MPAIAVGR-LDDSF SIGSLKAYVAEFISTLL          | FVFAGVGSIAIAYNKLTADAALDPAGLVAVAICHGFALFVAVSIGANISGG |                                    |    |    |    |    |
| OeuTIP2;3 | Oeu0539881 |       | -----                              | MPTIAFGR-IDDSLSVGS                        | LKAYLAEFISTLLFVFAGVGSIAIAYNKLT                      | YDAALDPAGLVAVAVCHGFALFVAVSIGANISGG |    |    |    |    |
| OeuTIP2;4 | Oeu0023291 |       | -----                              | MVKMTLGS-IGDSFSVPSLKAYLAEFIATLL           | FVFAGVGSIAIAYNKLTSDAALDPPGLVAVAVAHAFALFVGVSMANVSGG  |                                    |    |    |    |    |
| OeuTIP2;5 | Oeu0402071 |       | -----                              | MVKINWGS-IGDSFSVPSLKAYIAEFIATLL           | FVFAGVGSIAIAYNKLTSDAALDPPGLVAVAVAHAFALFVGVSMANVSGG  |                                    |    |    |    |    |
| OeuTIP3;1 | Oeu0383871 |       | -----                              | MPRGYTFGRAEATHPDSARATLAEFLSMLV            | FVFAGEGSLVALDKMYKDTALGASSLVVIALAHALS                | LFAAVASSMNVSGG                     |    |    |    |    |
| OeuTIP4;1 | Oeu0302291 |       | -----                              | MAKIALGN-AREAFQSDCIQALIVEFICTFL           | FVFAGVGAAMATDKLNGDPLV--GLFFVMAHALVAVMISAGFRVSGG     |                                    |    |    |    |    |
| AtTIP5;1  |            |       | -----                              | MRRMIPTSFSSKFQGVLSMNALRCYVSEFISTFF        | FVLAAGVSMSSRKLMAGDVSGPFGLVIPAIALNALALSSSVYISWNVSGG  |                                    |    |    |    |    |
| SlTIP5;1  |            |       | -----                              | MASLASRLQHSVTPNALRSYLAEFISTFF             | FVFAAGASMSTRKMVPDATSDPSSLVAIAVANAFALSVAVYISANISGG   |                                    |    |    |    |    |
| OeuTIP5;1 | Oeu0217081 |       | -----                              | MASLKSRLHETVTPNALRSYLAEFISTFF             | FVFASVGATMSTLKMMPDAASNSSGLVAIAVANAFALSVAVYIAYNISGG  |                                    |    |    |    |    |
| OeuTIP5;2 | Oeu0217091 |       | -----                              | MASLKSRLHETVTPNALRSYLAEFISTFF             | FVFASVGATMSTLKMMPDAASNSSGLVAIAVANAFALSVAVYIAYNISGG  |                                    |    |    |    |    |
| OeuTIP5;3 | Oeu0224791 |       | -----                              | MASLKSRLHESVTAIALRSYLAEFISTFF             | FVFAAGATMSSRKMPDAASDSSSLVAIAVANAFALSVTVYISANISGG    |                                    |    |    |    |    |

**H2**

|           |            |           |                 |                                               |                                                       |                                 |     |     |               |     |
|-----------|------------|-----------|-----------------|-----------------------------------------------|-------------------------------------------------------|---------------------------------|-----|-----|---------------|-----|
|           |            | 100       | 110             | 120                                           | 130                                                   | 140                             | 150 | 160 | 170           | 180 |
|           |            |           |                 |                                               | -----TM1-----                                         |                                 |     |     | -----TM2----- |     |
| AtTIP1;2  |            | HVNPAVTFG | VLLGGNITLLRGILY | WIAQLLGSVAACFLLSFAT                           | GGPEIPAFGLSAGVGS                                      | LNALVFEIVMTFGLVYTVYATAVDPKNGSLG |     |     |               |     |
| SlTIP1;1  |            | HVNPAVTFG | AFVGGNITLFRGILY | IIAQLLGSTAAACLLLEFAT                          | GGMSTGSFALSAGVSVWNAFVFEIVMTFGLVYTVYATAVDPKKGDLG       |                                 |     |     |               |     |
| OeuTIP1;3 | Oeu0354791 | HVNPAVTFG | LFLGGNVSLFRGILY | IIAQLLGSVVACLLLFST                            | GGLETSAFALTAGVSVWNAFVFEIVMTFGLVYTVYATAVDPKKGEIG       |                                 |     |     |               |     |
| OeuTIP1;1 | Oeu0585311 | HVNPAVTLG | AFVGGHITLFRS    | IMYWIAQLLGSVIACLLLK                           | FATGGLETSAFALSSGVTWNAVIFEIVMTFGLVYTVYATAVDPKKGNLG     |                                 |     |     |               |     |
| OeuTIP1;4 | Oeu0402901 | HVNPAVTFG | AFVGGHITLIRS    | ILYWIAQLLGSVVACLLLR                           | LATGGLETSAFALSSGVTWNAVFEIVMTFGLVYTVYATAVDPKRGNLG      |                                 |     |     |               |     |
| OeuTIP1;5 | Oeu0402891 | HVNPAVTFG | AFVGGHITLIRS    | ILYWIAQLLGSVVACLLLR                           | LATGGLETSAFALSSGVTWNAVFEIVMTFGLVYTVYATAVDPKRGNLG      |                                 |     |     |               |     |
| OeuTIP1;2 | Oeu0410141 | HVNPAVTFG | AFVGGHLSL       | FKTILYWIAQLLGAIVACLLLK                        | FSTGGLETSAFALSTGVSSWNAVFEIVMTFGLVYTVYATAVDPKRGDIG     |                                 |     |     |               |     |
| OeuTIP1;6 | Oeu0332441 | HVNPAVTFG | AFVGGNITLLRS    | ILYWIAQLLGSVVACILLK                           | FATGGLETSAFALSSGVTWNAVFEIVMTFGLVYTVYATAVDPKKGNLG      |                                 |     |     |               |     |
| OeuTIP1;7 | Oeu0452371 | HVNPAVTFG | AFVGGNISLIRG    | ILYWIAQLLGSVVACLLLK                           | FATGGLTAAAFSLSAGVNVWNAFVLEIVMTFGLVYTVYATAVDPKRGSLG    |                                 |     |     |               |     |
| OeuTIP2;1 | Oeu0240741 | HVNPAVTFG | LAVGGQITLLTGL   | FYWIAQLLGSI                                   | VACYLLVFVTGGGLAIPIHGVGAGVGA                           | FEIVITFALVYTVYATAADPKKGS        |     |     |               |     |
| OeuTIP2;2 | Oeu0240761 | HVNPAVTFG | LAVGGQITLLTGL   | FYWIAQLLGSI                                   | VACYLLVFVTGGGLAIPIHGVGAGVGA                           | FEIVITFALVYTVYATAADPKKGS        |     |     |               |     |
| OeuTIP2;3 | Oeu0539881 | HVNPAVTFG | LAVGGQITILTGL   | FYWIAQLLGSI                                   | VACFLKFTVGGGLAIPHSMAGVGAIEGV                          | MEIVITFALVYTVYATAVDPKKGS        |     |     |               |     |
| OeuTIP2;4 | Oeu0023291 | HLNPAVTFG | LAI             | GGNITITGIFYWIAQLLGSTVACLLLK                   | FVTNGLAIPHTHAVASGMNAVEGV                              | MEIVITFALVYTVYATAADPKKGS        |     |     |               |     |
| OeuTIP2;5 | Oeu0402071 | HLNPAVTFG | LAI             | GGNITITGIFYWIAQLLGSI                          | VACLLKFTVGGGLAIPHTHAVASGMNAVEGV                       | MEIVITFALVYTVYATAADPKKGS        |     |     |               |     |
| OeuTIP3;1 | Oeu0383871 | HVNPAVTFG | ALVGG           | RVSVLRAIYYWIAQLLGAVLAAI                       | LLRLATDGLRPRGFSVADGVGEWNALVMEIVLTFGLVYTVYATAIDPKRGSLG |                                 |     |     |               |     |
| OeuTIP4;1 | Oeu0302291 | HINPAVTLG | LLAGGHITV       | VSILYWIDQLLASTAACALLKYL                       | TGGGLTIPVHTLATGVDFAQGVIMEIVLTFSLFTVYATIVDPKGFLE       |                                 |     |     |               |     |
| AtTIP5;1  |            | HVNPAVTF  | AMAVAGRISVPTAMF | YWTSQMIASVMACLV                               | LKVTVMQHVPIYKIAGEMTGFGASVLEGV                         | LAFVLVYTVFT-ASDPRRGLPL          |     |     |               |     |
| SlTIP5;1  |            | HVNPAVTF  | GMAVGGHISIPMSIF | YWISQMGISVTCACLLKFTN--QQVPTHGIPQEMTGFGAAVLEGV | MTFGLVYTVYA-AADPRRCVHA                                |                                 |     |     |               |     |
| OeuTIP5;1 | Oeu0217081 | HVNPAVTF  | GMAIGGHISIPMAIF | YWISQTLGSI                                    | VACILKVTTVGQHVPTHSIPQEMTGFGAAILEGV                    | MTFGLVYTVYA-AADPRRGMS           |     |     |               |     |
| OeuTIP5;2 | Oeu0217091 | HVNPAVTF  | GMAIGGHISIPMAIF | YWISQTLGSI                                    | VACILKVTTVGQHVPTHSIPQEMTGFGAAILEGV                    | MTFGLVYTVYA-AADPRRGMS           |     |     |               |     |
| OeuTIP5;3 | Oeu0224791 | HVNPAVTF  | GMMVGGHISIPMAIF | YYSISQTFGSVMACLLKAT                           | TAGQHVPTHAIEHMTGFGGAVLEGV                             | MTFGLVYTVYA-ASNLRPV             |     |     |               |     |

**P1**

-NPA;LB--

-----TM3-----

-----TM4-----

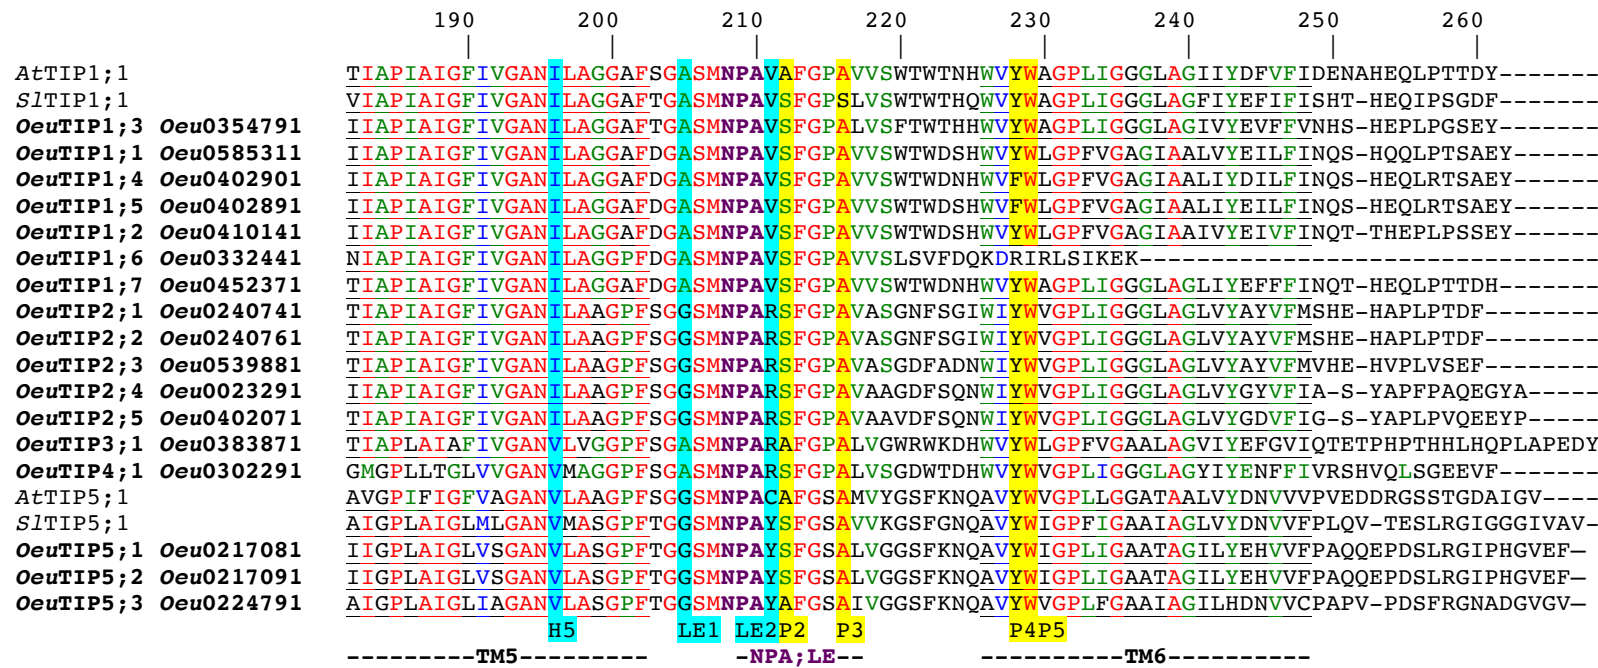

**Figure S5B. Amino acid sequence alignment of the *OeuTIPs* subfamily members from *Olea europaea* var. *sylvestris*.** *SlTIP1;1* (Solyc06g074820.1) and *SlTIP5;1* (Solyc03g093230.1) (Reuscher et al., 2013) from Tomato and *AtTIP1;1* (At2g36830) and *AtTIP5;1* (At3g47440) from *Arabidopsis thaliana* were used as references. The highest residue similarities between MIP members are shown in red (100%), and green (>80%). Residues with similar physicochemical behaviors are shown in blue. The six transmembrane domains (TMH1-6) and the two hemi-helicoidal regions that include the «NPA» motives «NPA1» (in Loop B) and «NPA2» (in Loop E) (framed in purple) are underlined. The amino acids residues constituting the ar/R constriction region are shown with blue highlights and labeled H2, H5, LE1 and LE2, and residues constituting the Froger's positions are shown with yellow highlights and labeled P1 to P5.



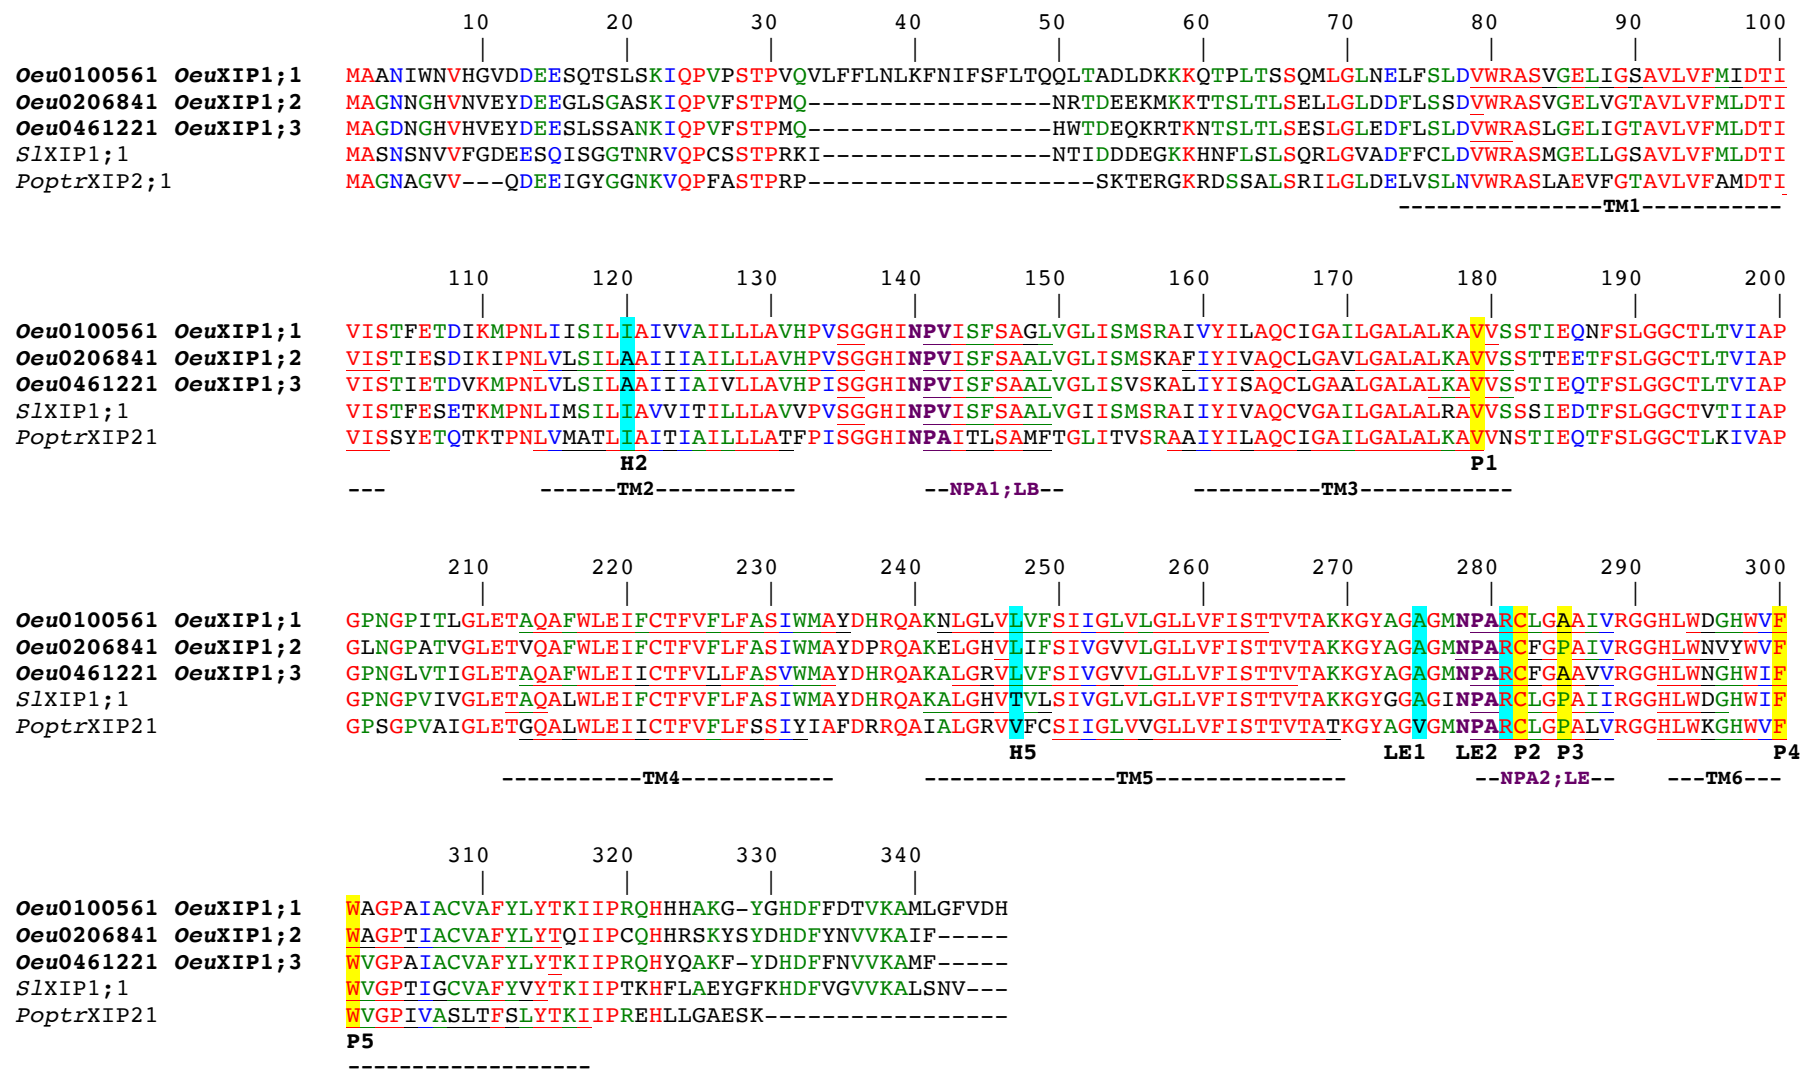

**Figure S5C.** Amino acid sequence alignment of the *OeuXIPs* subfamily members from *Olea europaea* var. *sylvestris*. *SlXIP1;1* (Solyc10g054840.1; Reuscher et al., 2013) from Tomato and *PoptrXIP2;1* (Potri.009G128500.1; Lopez et al, 2016) from Poplar were used as references. The highest residue similarities between MIP members are shown in red (100%), and green (>80%). Residues with similar physicochemical behaviors are shown in blue. The six transmembrane domains (TMH1-6) and the two hemi-helicoidal regions that include the «NPA» motives «NPA1» (in Loop B) and «NPA2» (in Loop E) (framed in purple) are underlined. The amino acids residues constituting the ar/R constriction region are shown with blue highlights and labeled H2, H5, LE1 and LE2, and residues constituting the Froger's positions are shown with yellow highlights and labeled P1 to P5.

|           |            |       |                                    |                                           |                                                                 |                                |    |    |    |    |
|-----------|------------|-------|------------------------------------|-------------------------------------------|-----------------------------------------------------------------|--------------------------------|----|----|----|----|
|           |            | 10    | 20                                 | 30                                        | 40                                                              | 50                             | 60 | 70 | 80 | 90 |
| AtTIP1;2  |            | ----- | MPTRNIAIGGVQE                      | EVYHPNALRAALAEFISTLI                      | FVFAGSGSGIAFNKITDNGATT                                          | PSGLVAAALAHAFGLFVAVSVGANISGG   |    |    |    |    |
| SlTIP1;1  |            | ----- | MPINQITIGS-HEELRHPGALKAAALAEFISTLI | FVFAGQSGMAFNKLT                           | DGVAT-PAGLISASIAHAFGLFVAVSVGANISGG                              |                                |    |    |    |    |
| OeuTIP1;3 | Oeu0354791 |       | MSSEFFNVPLRRVAFGH-RDEFRQPGA        | IKAAALAEFFSTLI                            | FVFAGEGSGMAYNKLTGNAPTSP                                         | PSGLVAAAVAHGFALFVAVSVGANISGG   |    |    |    |    |
| OeuTIP1;1 | Oeu0585311 |       | -----                              | MPISRVAIGS-PAEFSQLDAIKAAVAEFISMLI         | FVFAGQSGMAFAKLTDNESTTPAGLIAASIAHAFALFVAVSVGANISGG               |                                |    |    |    |    |
| OeuTIP1;4 | Oeu0402901 |       | -----                              | MPISRIVAGS-LAEASQPEALKATLAEFISMLI         | FVFAGEGSGMAFAKLTTNGSTTPTGLIAEAIHAFALFVAVSVGANISGG               |                                |    |    |    |    |
| OeuTIP1;5 | Oeu0402891 |       | -----                              | MPISRIVAGS-LAEASQPEALKATLAEFISMLI         | FVFAGEGSGMAFAKLTTNGSTTPTGLIAEAIHAFALFVAVSVGANISGG               |                                |    |    |    |    |
| OeuTIP1;2 | Oeu0410141 |       | -----                              | MPFSRISVGS-PAEASHPDTLKAAALAEFISMLI        | FVFAGEGSGMAFAKLTDGGSSTPAGLIAAAIAHAFALFVAVSVGANISGG              |                                |    |    |    |    |
| OeuTIP1;6 | Oeu0332441 |       | -----                              | MPIYRIAIGT-PGEASHPDALKAAALAEFFSMLI        | FVFAGQSGMAFNKLSNDGSPNPSGLLAAALAHAFALFVAVSVGANISGG               |                                |    |    |    |    |
| OeuTIP1;7 | Oeu0452371 |       |                                    | MYSNSM-RSGNQIAVGR-LEEATQQDALKAAALAEFISTLI | FVFAGSGSGMAFNKLTDDGATT                                          | PAGLIAAAVAHAFALFVAVSVGANISGG   |    |    |    |    |
| OeuTIP2;1 | Oeu0240741 |       | -----                              | MPAIAVGR-LDDSF SIGSLKAYVAEFISTLL          | FVFAGVGSIAIAYNKLTADAALDPAGLVAVAICHGFALFVAVSIGANISGG             |                                |    |    |    |    |
| OeuTIP2;2 | Oeu0240761 |       | -----                              | MPAIAVGR-LDDSF SIGSLKAYVAEFISTLL          | FVFAGVGSIAIAYNKLTADAALDPAGLVAVAICHGFALFVAVSIGANISGG             |                                |    |    |    |    |
| OeuTIP2;3 | Oeu0539881 |       | -----                              | MPTIAFGR-IDDSLSVGS                        | LKAYLAEFISTLLFVFAGVGSIAIAYNKLYDAALDPAGLVAVAVCHGFALFVAVSIGANISGG |                                |    |    |    |    |
| OeuTIP2;4 | Oeu0023291 |       | -----                              | MVKMTLGS-IGDSFSVPSL                       | KAYLAEFIATLLFVFAGVGSIAIAYNKLTSDAALDPPGLVAVAVAHAFALFVGVSMANVSGG  |                                |    |    |    |    |
| OeuTIP2;5 | Oeu0402071 |       | -----                              | MVKINWGS-IGDSFSVPSL                       | KAYIAEFIAITLLFVFAGVGSIAIAYNKLTSDAALDPPGLVAVAVAHAFALFVGVSMANVSGG |                                |    |    |    |    |
| OeuTIP3;1 | Oeu0383871 |       | -----                              | MPRGYTFGRAEATHPDSARATLAEFLSMLV            | FVFAGEGSVLALDKMYKDTALGASSLVVIALAHALS                            | LFAAVASSMNVSGG                 |    |    |    |    |
| OeuTIP4;1 | Oeu0302291 |       | -----                              | MAKIALGN-AREAFQSDCIQALIVEFICTFL           | FVFAGVGAAMATDKLNGDPLV--GLFFVMAHALVAVMISAGFRVSGG                 |                                |    |    |    |    |
| AtTIP5;1  |            |       | -----                              | MRRMIPTSFSSKFQGVLSMNALRCYVSEFISTFF        | FVLAAGVSMSSRKLMDGVS                                             | GPFGLVIPAIALNALALSSSVYISWNVSGG |    |    |    |    |
| SlTIP5;1  |            |       | -----                              | MASLASRLQHSVTPNALRSYLAEFLSTFF             | FVFAAGASMSTRKMVPDATSDPSSLVAIAVANAFALSVAVYISANISGG               |                                |    |    |    |    |
| OeuTIP5;1 | Oeu0217081 |       | -----                              | MASLKSRLHETVTPNALRSYLAEFISTFF             | FVFASVGATMSTLKMMPDAASNSSGLVAIAVANAFALSVAVYIAYNISGG              |                                |    |    |    |    |
| OeuTIP5;2 | Oeu0217091 |       | -----                              | MASLKSRLHETVTPNALRSYLAEFISTFF             | FVFASVGATMSTLKMMPDAASNSSGLVAIAVANAFALSVAVYIAYNISGG              |                                |    |    |    |    |
| OeuTIP5;3 | Oeu0224791 |       | -----                              | MASLKSRLHETVTAIALRSYLAEFISTFF             | FVFAAGATMSSSRKMMPDAASDSSSLVAIAVANAFALSVTVYISANISGG              |                                |    |    |    |    |

**H2**

|           |            |     |     |     |     |     |     |     |     |     |
|-----------|------------|-----|-----|-----|-----|-----|-----|-----|-----|-----|
|           |            | 100 | 110 | 120 | 130 | 140 | 150 | 160 | 170 | 180 |
| AtTIP1;2  |            |     |     |     |     |     |     |     |     |     |
| SlTIP1;1  |            |     |     |     |     |     |     |     |     |     |
| OeuTIP1;3 | Oeu0354791 |     |     |     |     |     |     |     |     |     |
| OeuTIP1;1 | Oeu0585311 |     |     |     |     |     |     |     |     |     |
| OeuTIP1;4 | Oeu0402901 |     |     |     |     |     |     |     |     |     |
| OeuTIP1;5 | Oeu0402891 |     |     |     |     |     |     |     |     |     |
| OeuTIP1;2 | Oeu0410141 |     |     |     |     |     |     |     |     |     |
| OeuTIP1;6 | Oeu0332441 |     |     |     |     |     |     |     |     |     |
| OeuTIP1;7 | Oeu0452371 |     |     |     |     |     |     |     |     |     |
| OeuTIP2;1 | Oeu0240741 |     |     |     |     |     |     |     |     |     |
| OeuTIP2;2 | Oeu0240761 |     |     |     |     |     |     |     |     |     |
| OeuTIP2;3 | Oeu0539881 |     |     |     |     |     |     |     |     |     |
| OeuTIP2;4 | Oeu0023291 |     |     |     |     |     |     |     |     |     |
| OeuTIP2;5 | Oeu0402071 |     |     |     |     |     |     |     |     |     |
| OeuTIP3;1 | Oeu0383871 |     |     |     |     |     |     |     |     |     |
| OeuTIP4;1 | Oeu0302291 |     |     |     |     |     |     |     |     |     |
| AtTIP5;1  |            |     |     |     |     |     |     |     |     |     |
| SlTIP5;1  |            |     |     |     |     |     |     |     |     |     |
| OeuTIP5;1 | Oeu0217081 |     |     |     |     |     |     |     |     |     |
| OeuTIP5;2 | Oeu0217091 |     |     |     |     |     |     |     |     |     |
| OeuTIP5;3 | Oeu0224791 |     |     |     |     |     |     |     |     |     |

-NPA;LB--

**P1**

-----TM3-----

-----TM4-----



**Figure S5B. Amino acid sequence alignment of the *OeuTIPs* subfamily members from *Olea europaea* var. *sylvestris*.** *SlTIP1;1* (Solyc06g074820.1) and *SlTIP5;1* (Solyc03g093230.1) (Reuscher et al., 2013) from Tomato and *AtTIP1;1* (At2g36830) and *AtTIP5;1* (At3g47440) from *Arabidopsis thaliana* were used as references. The highest residue similarities between MIP members are shown in red (100%), and green (>80%). Residues with similar physicochemical behaviors are shown in blue. The six transmembrane domains (TMH1-6) and the two hemi-helicoidal regions that include the «NPA» motives «NPA1» (in Loop B) and «NPA2» (in Loop E) (framed in purple) are underlined. The amino acids residues constituting the ar/R constriction region are shown with blue highlights and labeled H2, H5, LE1 and LE2, and residues constituting the Froger's positions are shown with yellow highlights and labeled P1 to P5.



|                  |                   |                                                                                                |     |     |     |     |     |     |    |    |  |
|------------------|-------------------|------------------------------------------------------------------------------------------------|-----|-----|-----|-----|-----|-----|----|----|--|
|                  |                   | 10                                                                                             | 20  | 30  | 40  | 50  | 60  | 70  | 80 | 90 |  |
| <i>SlSIP1;1</i>  |                   | ---MGVIKAAIADGLLTFLWVFCSSNIGVSTYFIASYFGIVN-EIPSLFITTLIVFVIFLMFDFLGDVLGGAGFNPTGNAAFYAAAGLG-D    |     |     |     |     |     |     |    |    |  |
| <i>SlSIP1;2</i>  |                   | ---MGAVKAAVGDVLTLMWVFCSSTLGIFTYLIATAFGIAQ-GMASLFTITTVLIFMLFFVFGIIGDALGGAAFNPAGTAAFYAAAGVG-K    |     |     |     |     |     |     |    |    |  |
| <i>AtSIP1;1</i>  |                   | ---MGVLKSAIGDMLMTFSWVVLSTATFGIQTAAIISAGDFQAITWAPLVILTSLIFVYVSIFTVI---FGSASFNP TGSAAFYVAGVP-G   |     |     |     |     |     |     |    |    |  |
| <i>AtSIP1;2</i>  |                   | ---MSAVKSALGDMVITFLWVILSATFGIQTAAIVSAVGFHGITWAPLVISTLVVVFVSISIFTVIGNVLGGASFNPCCGNAAFYTAGVS-S   |     |     |     |     |     |     |    |    |  |
| <i>OeuSIP1;1</i> | <i>Oeu0502921</i> | ---MGAIKAAVADGVLTFMWVFCASLTGALTFVVASALGVSQ-GLPTLLVTTVLVFVLLFVFGIIGDFLGGATFNPTAIAAFYAAAGIGGA    |     |     |     |     |     |     |    |    |  |
| <i>OeuSIP1;2</i> | <i>Oeu0147232</i> | ---MRAIKVAIADAIVTCLWVFCASLTGALTFVVASAFGVSQ-GLPTLLITTFLLFVLLFVFGFIGDALGGATFNPTGPAAFYAAAGVGGT    |     |     |     |     |     |     |    |    |  |
| <i>AtSIP2;1</i>  |                   | ---MGRIGLVVTDLVLSFMWVWSSVLIKMFVHKIL---GYGAHDL-----KGGAYNPLTILSGAISG-DLT                        |     |     |     |     |     |     |    |    |  |
| <i>SlSIP2;1</i>  |                   | -MGVSRRLVISDFIMSFMWVWSSVLIKMFVHKIL---GYGAHDL-----KGGAYNPLTILSGAISG-DLT                         |     |     |     |     |     |     |    |    |  |
| <i>OeuSIP2;1</i> | <i>Oeu0607491</i> | MAAVGGRLLLVSDFFMSFMWVWSSVLIKMFVYKIL---GYGTHDLKGEILRYGISLVNMFFFAFLAKATKGGAYNPLTILSSAISG-DLS     |     |     |     |     |     |     |    |    |  |
| <i>OeuSIP2;2</i> | <i>OeuChr11</i>   | MAAVRGRRLLVSDFLMSFMWVWSSVLIKMFVYKIL---DYGSHDMKGEILRYGISLVNMFFFAFLAKATKGGAYNPLTVLSSAISG-NFS     |     |     |     |     |     |     |    |    |  |
|                  |                   | -----TM1-----H2-----TM2-----NPA;LB-----                                                        |     |     |     |     |     |     |    |    |  |
| 100              | 110               | 120                                                                                            | 130 | 140 | 150 | 160 | 170 | 180 |    |    |  |
| <i>SlSIP1;1</i>  |                   | DSLVSAAVRCPAQVAGAVAGSLALVELIPKHYHHMLDG-PALKVDVQGTGAIAEGVLTFFVITFMIFVIVLVRGPESVLLKNWLLTMVTLPLV  |     |     |     |     |     |     |    |    |  |
| <i>SlSIP1;2</i>  |                   | DSLFTVATRFPAQAAGAVAGAVAILEVIPTQYKHM LGG-PSLKVDLHNGAIAEGILTFFVMTFLVFIIVLKGPKSALLKNWLLAMSTVTMV   |     |     |     |     |     |     |    |    |  |
| <i>AtSIP1;1</i>  |                   | DTLFSLAIRLPAQAI GAAGGALAIMEFIPEKYKHMIGG-PSLQVDVHTGAIAETILSFGITFAVLLIILRGPRRLAKTFLLALATISFV     |     |     |     |     |     |     |    |    |  |
| <i>AtSIP1;2</i>  |                   | DSLFSLAIRSPAQAI GAAGGAIITIMEMIPKEYKTRIGGKPSLQFGAHNGAISEVVLSFSVTFVLVLLIILRGPRKLLAKTFLLALATVSVF  |     |     |     |     |     |     |    |    |  |
| <i>OeuSIP1;1</i> | <i>Oeu0502921</i> | DSLFSAAALRFPAQAAGAVGGALAIMEVMPMQYKHM LGG-PSLKVDLHTGAIAEGVLTFFITFAVLLIVLVRGPNPLVKNWLLAMATVSAV   |     |     |     |     |     |     |    |    |  |
| <i>OeuSIP1;2</i> | <i>Oeu0147232</i> | ESLVSAAVRFPAQAAGAVGGALGILEVMPVQYKHM LDC-PSLKVDLNTGAIAEGVLTFFITFAVLYIVLVRGPTNPFVKNWLLAMSTVALV   |     |     |     |     |     |     |    |    |  |
| <i>AtSIP2;1</i>  |                   | SFIFSVFVRIPVEVIGSILAVKHIHVFPE-----IGKGPKLNVAIHGHGALTEGILTFEIVLLSMGLTRKIPGSFFMKTWIGSLAKLTLH     |     |     |     |     |     |     |    |    |  |
| <i>SlSIP2;1</i>  |                   | NFIFTVAAIRIPSQVFGSITGVRFIIAAFP N-----IGRGPVLSIDIHRRGALTEGILTFEIVLSISGLSRRSRASTFMKTWISSSLKLT LH |     |     |     |     |     |     |    |    |  |
| <i>OeuSIP2;1</i> | <i>Oeu0607491</i> | NFLFTVGARIPIQVLGSIYGVRFILAAFP E-----IGRGPRLNVDIARGALTEGLLTFGIVIIISQGLSRKIPGSFFMKTWISSSVSKLT LH |     |     |     |     |     |     |    |    |  |
| <i>OeuSIP2;2</i> | <i>OeuChr11</i>   | NFLFTVGARIPVQVLGSIYGVRLILAAFP E-----IGRGPRLNVDITRGALTEGFLTFGIVIIISQGLSRKLPGSFFMKTWISSSVSKLT LH |     |     |     |     |     |     |    |    |  |
|                  |                   | P1-----TM3-----TM4-----H5-----TM5-----                                                         |     |     |     |     |     |     |    |    |  |
|                  |                   | 190                                                                                            | 200 | 210 | 220 | 230 | 240 | 250 |    |    |  |
| <i>SlSIP1;1</i>  |                   | LAGSNFTGPSMNPANAFGWAYLSNTHKTLLEHFYVYWISPFIGAILAAWIFRVLFP PPVEQ-KPQKQKRN-----                   |     |     |     |     |     |     |    |    |  |
| <i>SlSIP1;2</i>  |                   | VAGSKYTGPSMNPANAFGWAYINNHNHTWEQFYVYWICPFVGAIMAAWTFRAVFPAPAKKKKPKQKKRN-----                     |     |     |     |     |     |     |    |    |  |
| <i>AtSIP1;1</i>  |                   | VAGSKYTGPAMNPAAIAGWAMYSSHNHTWDHIYVYWISSFVGALSAALLFRSIFPPPRPQKKKQKKA-----                       |     |     |     |     |     |     |    |    |  |
| <i>AtSIP1;2</i>  |                   | VVGSKFTRPFMNPAAIAGWAIYKSHNHTWDHFYVYWISSYTGAILSAMLFRIFFPAPPLVQKKQKKA-----                       |     |     |     |     |     |     |    |    |  |
| <i>OeuSIP1;1</i> | <i>Oeu0502921</i> | VAGSSYTGPSMNPANAFGWAYVYNKHNHTWEQFYVYWICPFTGAILAAWTFRFLFP PPPTKQDKAKKA-----                     |     |     |     |     |     |     |    |    |  |
| <i>OeuSIP1;2</i> | <i>Oeu0147232</i> | VAGSSYTGPSMNPANAFGWAYVNNHTKHTWEQFYVYWICPFTGAILAAWTFRFLFP PPVPK-KQKKA-----                      |     |     |     |     |     |     |    |    |  |
| <i>AtSIP2;1</i>  |                   | ILGSDLTGGCMNPAAVMGWAYARGEHITKEHLIVYWLGPVKATLLAVWFFKVVFKPLTEEQEKPKA-KSE----                     |     |     |     |     |     |     |    |    |  |
| <i>SlSIP2;1</i>  |                   | ILGSDLTGGCMNPASVMGWAYARGDHITKEHLIVYWLAPIQATLLAVWTFNLLVSPSKDKEAKKTEKKSE----                     |     |     |     |     |     |     |    |    |  |
| <i>OeuSIP2;1</i> | <i>Oeu0607491</i> | ILGSDLTGGCMNPASVMGWAFAGHEHISKEHLIVYWLAPMEATLAAVWAFRLIVRPKKDETLKAKSVKSDCKNS                     |     |     |     |     |     |     |    |    |  |
| <i>OeuSIP2;2</i> | <i>OeuChr11</i>   | MLGSDLTGGCMNPASVMGWAFTRGEHISKEHLIVYWLAPMEATLAAVWAFRVVVRPNDKTPKVKSGKSE----                      |     |     |     |     |     |     |    |    |  |
|                  |                   | LE1 LE2P2 P3 P4P5<br>-----NPA;LB-----TM1-----                                                  |     |     |     |     |     |     |    |    |  |

**Figure S5E. Amino acid sequence alignment of the *OeuSIPs* subfamily members from *Olea europaea* var. *sylvestris*.** *SlSIP1;1* (Solyc12g0196.1), *SlSIP1;2* (Solyc10g0784.1) and *SlSIP2;1* (Solyc01g0567.1) (Reuscher et al., 2013) from Tomato, and *AtSIP1;1* (AT3G04090), *AtSIP1;2* (AT5G18290) and *AtSIP2;1* (AT3G56950) (Reuscher et al., 2013) from *Arabidopsis thaliana* were used as references. The highest residue similarities between MIP members are shown in red (100%), and green (>80%). Residues with similar physicochemical behaviors are shown in blue. The six transmembrane domains (TMH1-6) and the two hemi-helicoidal regions that include the «NPA» motives «NPA1» (in Loop B) and «NPA2» (in Loop E) (framed in purple) are underlined. The amino acids residues constituting the ar/R constriction region are shown with blue highlights and labeled H2, H5, LE1 and LE2, and residues constituting the Froger's positions are shown with yellow highlights and labeled P1 to P5.
