# Supplementary material for: Genome Wild Analysis and Molecular Understanding of the Aquaporin Diversity in Olive Trees (Olea Europaea L.)
Source: MDPI journal article supplement (doi:10.3390/ijms21114183), 2020-06-11
Supplement: s1 [file s1]

**Table S2.** Correspondance between aquaporin gene sequences from *Olea europaea* var. *sylvestris* (*Oeu*APQ) and *Olea europaea* cv. Picual (*Oleur*AQP)

*Oeu*AQPs were extracted from Phytozome V12 portail

([https://phytozome.jgi.doe.gov/pz/portal.html#!search?show=BLAST&method=Org\\_Oeuropaea\\_er](https://phytozome.jgi.doe.gov/pz/portal.html#!search?show=BLAST&method=Org_Oeuropaea_er))

*Oleur*AQPs were extracted from OliveTreeDB database (<https://genomaolivar.dipujaen.es/db/index.php>)

*Oeu*AQP sequences (genomic, CDS and protein) are detailed in Supplemental FigureS1

*Oleur*AQP sequences (genomic, CDS and protein) are listed in the Supplemental FigureS2

Proposed nomenclature was established by comparaison with orthologuous aquaporins from *A. thaliana*, *L. esculentum*, *F. excelsior* and *P. trichocarpa*

**Legends :**

Pseudogenes and Incomplete sequences are mentionned in red.

| MIP subclasses | Phytozome V12                                                                                                                                  | OliveTreeDB <i>Olea europaea</i> L.                                                                                                                                                                                                                                                                                                                      |                                                                                                                                                                                                                                                                                                                                                                                                                                                                                                                                                                                                                                |
|----------------|------------------------------------------------------------------------------------------------------------------------------------------------|----------------------------------------------------------------------------------------------------------------------------------------------------------------------------------------------------------------------------------------------------------------------------------------------------------------------------------------------------------|--------------------------------------------------------------------------------------------------------------------------------------------------------------------------------------------------------------------------------------------------------------------------------------------------------------------------------------------------------------------------------------------------------------------------------------------------------------------------------------------------------------------------------------------------------------------------------------------------------------------------------|
|                | Proposed Nomenclature                                                                                                                          | Proposed Nomenclature                                                                                                                                                                                                                                                                                                                                    | Locus                                                                                                                                                                                                                                                                                                                                                                                                                                                                                                                                                                                                                          |
| PIP1           | <i>Oeu038800.1</i> / <i>Oeu</i> PIP1;1a<br><i>Oeu038801.1</i> / <i>Oeu</i> PIP1;1b<br><i>Oeu038802.2</i> / <i>Oeu</i> PIP1;1c                  | <i>Oleur</i> PIP1;1                                                                                                                                                                                                                                                                                                                                      | <i>Oleur061Scf2846g07022.1</i> ; 701124..702805 (- strand)                                                                                                                                                                                                                                                                                                                                                                                                                                                                                                                                                                     |
|                | <i>Oeu018133.1</i> / <i>Oeu</i> PIP1;2                                                                                                         | <i>Oleur</i> PIP1;2a<br><i>Oleur</i> PIP1;2b                                                                                                                                                                                                                                                                                                             | <i>Oleur061Scf0176g00018.1</i> ; 63114..64769 (+ strand)<br><i>Oleur061Scf0994g03003.1</i> ; 369686..371341 (+ strand)                                                                                                                                                                                                                                                                                                                                                                                                                                                                                                         |
|                | <i>Oeu042329.1</i> / <i>Oeu</i> PIP1;3                                                                                                         | <i>Oleur</i> PIP1;3a<br><i>Oleur</i> PIP1;3b                                                                                                                                                                                                                                                                                                             | <i>Oleur061Scf1119g10041.1</i> ; 1019235..1022315 (- strand)<br><i>Oleur061Scf3031g04003.1</i> ; 499618..502336 (+ strand)                                                                                                                                                                                                                                                                                                                                                                                                                                                                                                     |
|                | <i>Oeu052954.1</i> / <i>Oeu</i> PIP1;4                                                                                                         | <i>Oleur</i> PIP1;4a<br><i>Oleur</i> PIP1;4b                                                                                                                                                                                                                                                                                                             | <i>Oleur061Scf0931g02045.1</i> ; 329811..332344 (- strand)<br><i>Oleur061Scf0180g12067.1</i> ; 1186334..1190261                                                                                                                                                                                                                                                                                                                                                                                                                                                                                                                |
|                | <i>Oeu061384.2</i> / <i>Oeu</i> PIP1;5                                                                                                         | <i>Oleur</i> PIP1;5a<br><i>Oleur</i> PIP1;5b                                                                                                                                                                                                                                                                                                             | <i>Oleur061Scf2999g01010.1</i> ; 181146..184008 (- strand)<br><i>Oleur061Scf0451g01009.1</i> ; 160386..163969                                                                                                                                                                                                                                                                                                                                                                                                                                                                                                                  |
|                | <i>Oeu046350.1</i> / <i>Oeu</i> PIP1;6                                                                                                         | <i>Oleur</i> PIP1;6a<br><i>Oleur</i> PIP1;6b                                                                                                                                                                                                                                                                                                             | <i>Oleur061Scf6143g00002.1</i> ; 10938..14002 (- strand)<br><i>Oleur061Scf8779g00011.1</i> ; 132329..136726                                                                                                                                                                                                                                                                                                                                                                                                                                                                                                                    |
|                | <i>Oeu022396.1</i> / <i>Oeu</i> PIP1-related<br><i>Oeu018831.2</i> / <i>Oeu</i> PIP1-related<br>-<br>-<br>-<br>-<br>-<br>-<br>-<br>-<br>-<br>- | <i>Oleur</i> PIP1-related<br><i>Oleur</i> PIP1-related | <i>Oleur061Scf0830g11020.1 Pseudogene</i><br><i>Oleur061Scf0761g01005.1 Pseudogene</i><br><i>Oleur061Scf2581g00016.1</i><br><i>Oleur061Scf0830g08007.1 Incomplete sequence</i><br><i>Oleur061Scf0830g08009.1 Incomplete sequence</i><br><i>Oleur061Scf0830g09001.1 Incomplete sequence</i><br><i>Oleur061Scf0830g09023.1 Incomplete sequence</i><br><i>Oleur061Scf0830g09012.1 Incomplete sequence</i><br><i>Oleur061Scf0830g10010.1 Incomplete sequence</i><br><i>Oleur061Scf1121g01015.1 Incomplete sequence</i><br><i>Oleur061Scf1121g01024.1 Incomplete sequence</i><br><i>Oleur061Scf1121g01006.1 Incomplete sequence</i> |
|                | <i>Oeu010785.1</i> / <i>Oeu</i> PIP1-related<br><i>Oeu019177.1</i> / <i>Oeu</i> PIP1-related                                                   | No hits found<br>No hits found                                                                                                                                                                                                                                                                                                                           | -<br>-                                                                                                                                                                                                                                                                                                                                                                                                                                                                                                                                                                                                                         |
| PIP2           | <i>Oeu030183.1</i> / <i>Oeu</i> PIP2;1                                                                                                         | <i>Oleur</i> PIP2;1a<br><i>Oleur</i> PIP2;1b                                                                                                                                                                                                                                                                                                             | <i>Oleur061Scf0523g01011.1</i> ; 148832..151185 (+ strand)<br><i>Oleur061Scf0872g05024.1</i> ; 512608..514991 (+ strand)                                                                                                                                                                                                                                                                                                                                                                                                                                                                                                       |
|                | <i>Oeu001271.1</i> / <i>Oeu</i> PIP2;2                                                                                                         | <i>Oleur</i> PIP2;2a<br><i>Oleur</i> PIP2;2b                                                                                                                                                                                                                                                                                                             | <i>Oleur061Scf6622g04008.1</i> ; 431311..433104 (- strand)<br><i>Oleur061Scf8869g00006.1</i> ; 18552..20344 (- strand)                                                                                                                                                                                                                                                                                                                                                                                                                                                                                                         |
|                | <i>Oeu033842.1</i> / <i>Oeu</i> PIP2;3                                                                                                         | <i>Oleur</i> PIP2;3a<br><i>Oleur</i> PIP2;3b                                                                                                                                                                                                                                                                                                             | <i>Oleur061Scf0690g01039.1</i> ; 166917..168873 (- strand)<br><i>Oleur061Scf8232g00023.1</i> ; 53550..55667 (+ strand)                                                                                                                                                                                                                                                                                                                                                                                                                                                                                                         |
|                | <i>Oeu030439.1</i> / <i>Oeu</i> PIP2;4                                                                                                         | <i>Oleur</i> PIP2;4                                                                                                                                                                                                                                                                                                                                      | <i>Oleur061Scf0101g01002.1</i> ; 84671..86479 (- strand)                                                                                                                                                                                                                                                                                                                                                                                                                                                                                                                                                                       |
|                | <i>Oeu027987.1</i> / <i>Oeu</i> PIP2;5                                                                                                         | <i>Oleur</i> PIP2;5                                                                                                                                                                                                                                                                                                                                      | <i>Oleur061Scf3195g08011.1</i> ; 828028..829785 (+ strand)                                                                                                                                                                                                                                                                                                                                                                                                                                                                                                                                                                     |
|                | <i>Oeu017257.1</i> / <i>Oeu</i> PIP2;6                                                                                                         | <i>Oleur</i> PIP2;6a<br><i>Oleur</i> PIP2;6b                                                                                                                                                                                                                                                                                                             | <i>Oleur061Scf0106g06001.1</i> ; 611096..613917 (- strand)<br><i>Oleur061Scf0638g02012.1</i> ; 213705..216526 (- strand)                                                                                                                                                                                                                                                                                                                                                                                                                                                                                                       |
|                | <i>Oeu018111.1</i> / <i>Oeu</i> PIP2;7                                                                                                         | <i>Oleur</i> PIP2;7                                                                                                                                                                                                                                                                                                                                      | <i>Oleur061Scf6451g01042.1</i> ; 160614..162280 (+ strand)                                                                                                                                                                                                                                                                                                                                                                                                                                                                                                                                                                     |
|                | <i>Oeu023232.1</i> / <i>Oeu</i> PIP2;8                                                                                                         | <i>Oleur</i> PIP2;8a<br><i>Oleur</i> PIP2;8b                                                                                                                                                                                                                                                                                                             | <i>Oleur061Scf3978g00008.1</i> ; 91118..92620 (- strand)<br><i>Oleur061Scf0410g01025.1</i> ; 167787..169203 (- strand)                                                                                                                                                                                                                                                                                                                                                                                                                                                                                                         |
|                | <i>Oeu020106.1</i> / Scaffold870 / <i>Oeu</i> PIP2;9                                                                                           | <i>Oleur</i> PIP2;9a<br><i>Oleur</i> PIP2;9b                                                                                                                                                                                                                                                                                                             | <i>Oleur061Scf7760g00005.1</i> ; 51176..52742 (- strand)<br><i>Oleur061Scf1616g00016.1</i> ; 35879..37453 (+ strand)                                                                                                                                                                                                                                                                                                                                                                                                                                                                                                           |
|                | <i>Oeu022438.1</i> / Scaffold2530 / <i>Oeu</i> PIP2;10                                                                                         | <i>Oleur</i> PIP2;10                                                                                                                                                                                                                                                                                                                                     | <i>Oleur061Scf0101g01021.1</i> ; 86880..93288 (- strand)                                                                                                                                                                                                                                                                                                                                                                                                                                                                                                                                                                       |
|                | <i>Oeu017254.1</i> / <i>Oeu017256.1</i> / <i>Oeu</i> PIP2;11                                                                                   | <i>Oleur</i> PIP2;11                                                                                                                                                                                                                                                                                                                                     | <i>Oleur061Scf0106g06008.1</i> ; 626873..647970 length=21098                                                                                                                                                                                                                                                                                                                                                                                                                                                                                                                                                                   |
|                | No hit found                                                                                                                                   | <i>Oleur</i> PIP2;12                                                                                                                                                                                                                                                                                                                                     | <i>Oleur061Scf0156g01015.1</i> ; 141041..142902 (- strand)                                                                                                                                                                                                                                                                                                                                                                                                                                                                                                                                                                     |
|                | <i>Oeu059136.1</i> / <i>Oeu</i> PIP2-related                                                                                                   | <i>Oleur</i> PIP2-related                                                                                                                                                                                                                                                                                                                                | <i>Oleur061Scf6854g04027.1 Incomplete sequence</i>                                                                                                                                                                                                                                                                                                                                                                                                                                                                                                                                                                             |
|                | -                                                                                                                                              | <i>Oleur</i> PIP2-related<br><i>Oleur</i> PIP2;7-related<br><i>Oleur</i> PIP2;10-related<br><i>Oleur</i> PIP2;11-related                                                                                                                                                                                                                                 | <i>Oleur061Scf2856g00010.1 Incomplete sequence</i><br><i>Oleur061Scf6288g00002.1 Incomplete sequence</i><br><i>Oleur061Scf0243g01010.1 Incomplete sequence</i><br><i>Oleur061Scf0638g02004.1 Incomplete sequence</i>                                                                                                                                                                                                                                                                                                                                                                                                           |

|     |                                                                                                                       |                                                                                                                                                                                                    |                                                                                                                                                                                                                                                                                                                                                             |
|-----|-----------------------------------------------------------------------------------------------------------------------|----------------------------------------------------------------------------------------------------------------------------------------------------------------------------------------------------|-------------------------------------------------------------------------------------------------------------------------------------------------------------------------------------------------------------------------------------------------------------------------------------------------------------------------------------------------------------|
| TIP | <i>Oeu058531.1 / OeuTIP1;1</i>                                                                                        | <i>OleurTIP1;1</i>                                                                                                                                                                                 | <i>Oleur061Scf3090g01006.1 ; 93487.94956 (- strand)</i>                                                                                                                                                                                                                                                                                                     |
|     | <i>Oeu041014.1 / OeuTIP1;2</i>                                                                                        | <i>OleurTIP1;2a</i><br><i>OleurTIP1;2b</i>                                                                                                                                                         | <i>Oleur061Scf8429g00004.1 ; 141483.143267 (+ strand)</i><br><i>Oleur061Scf0417g02009.1 ; 223466.225244 (- strand)</i>                                                                                                                                                                                                                                      |
|     | <i>Oeu035479.1 / OeuTIP1;3</i>                                                                                        | <i>OleurTIP1;3a</i><br><i>OleurTIP1;3b</i><br><i>OleurTIP1;3c</i><br><i>OleurTIP1;3d</i><br><i>OleurTIP1;3e</i>                                                                                    | <i>Oleur061Scf1330g06004.1 ; 642994.644469 (- strand)</i><br><i>Oleur061Scf4360g00007.1 ; 27330.28805 (+ strand)</i><br><i>Oleur061Scf7549g01032.1 ; 241767.243178 (- strand)</i><br><i>Oleur061Scf0466g03012.1 ; 372836.374085 (- strand)</i><br><i>Oleur061Scf3806g00010.1 ; 21034.22285 (+ strand)</i>                                                   |
|     | <i>Oeu040290.1 / OeuTIP1;4</i>                                                                                        | <i>OleurTIP1;4-related</i>                                                                                                                                                                         | <i>Oleur061Scf5170g00024.1 Incomplete sequence</i>                                                                                                                                                                                                                                                                                                          |
|     | <i>Oeu040289.1 / OeuTIP1;5</i>                                                                                        | <i>OleurTIP1;5</i>                                                                                                                                                                                 | <i>Oleur061Scf7653g04013.1 ; 468560.470420 (- strand)</i>                                                                                                                                                                                                                                                                                                   |
|     | <i>Oeu033244.1 / OeuTIP1;6</i>                                                                                        | <i>OleurTIP1;6</i>                                                                                                                                                                                 | <i>Oleur061Scf5512g00068.1 ; 141526.147261 (- strand)</i>                                                                                                                                                                                                                                                                                                   |
|     | <i>Oeu045237.1 / OeuTIP1;7</i>                                                                                        | <i>OleurTIP1;7</i><br><i>OleurTIP1;7-related</i>                                                                                                                                                   | <i>Oleur061Scf360g04010.1 ; 442951.444443 (- strand)</i><br><i>Oleur061Scf3142g00008.1 ; 34430.35603 (+ strand)</i>                                                                                                                                                                                                                                         |
|     | <i>Oeu024074.1 / OeuTIP2;1</i><br><i>Oeu024076.1 / OeuTIP2;2</i>                                                      | <i>OleurTIP2;1</i>                                                                                                                                                                                 | <i>Oleur061Scf1395g09059.1 ; 971893.975231 (+ strand)</i>                                                                                                                                                                                                                                                                                                   |
|     | <i>Oeu053988.1 / OeuTIP2;3</i>                                                                                        | <i>OleurTIP2;3a</i><br><i>OleurTIP2;3b</i>                                                                                                                                                         | <i>Oleur061Scf5616g00030.1 ; 47019.49189 (- strand)</i><br><i>Oleur061Scf6190g00017.1 ; 16438.18599 (+ strand)</i>                                                                                                                                                                                                                                          |
|     | <i>Oeu002329.1 / OeuTIP2;4</i>                                                                                        | <i>OleurTIP2;4</i>                                                                                                                                                                                 | <i>Oleur061Scf2185g00004.1 ; 106483.109800 (- strand)</i>                                                                                                                                                                                                                                                                                                   |
|     | <i>Oeu040207.1 / OeuTIP2;5</i>                                                                                        | <i>OleurTIP2;5a</i><br><i>OleurTIP2;5b</i>                                                                                                                                                         | <i>Oleur061Scf1607g00003.1 ; 86016.87968 (+ strand)</i><br><i>Oleur061Scf8992g00006.1 ; 66181.68174 (+ strand)</i>                                                                                                                                                                                                                                          |
|     | <i>Oeu038387.1 / OeuTIP3;1</i>                                                                                        | <i>OleurTIP3;1a</i><br><i>OleurTIP3;1b</i><br><i>OleurTIP3;1c</i>                                                                                                                                  | <i>Oleur061Scf6254g04008.1 ; 448318.449463 (- strand)</i><br><i>Oleur061Scf5220g00047.1 ; 6075.7220 (- strand)</i><br><i>Oleur061Scf3963g07030.1 ; 728110.729328 (- strand)</i>                                                                                                                                                                             |
|     | <i>Oeu030229.1 / Oeu036364.1 / OeuTIP4;1</i>                                                                          | <i>OleurTIP4;1</i>                                                                                                                                                                                 | <i>Oleur061Scf6420g00014.1 ; 44973.52364 (- strand)</i>                                                                                                                                                                                                                                                                                                     |
|     | <i>Oeu021708.1 / OeuTIP5;1</i>                                                                                        | <i>OleurTIP5;1</i>                                                                                                                                                                                 | <i>Oleur061Scf8528g00015.1 ; 7335.8665 (+ strand)</i>                                                                                                                                                                                                                                                                                                       |
|     | <i>Oeu021709.1 / OeuTIP5;2</i>                                                                                        | <i>OleurTIP5;2</i>                                                                                                                                                                                 | <i>Oleur061Scf0430g00024.1 ; 47031.48350 (- strand)</i>                                                                                                                                                                                                                                                                                                     |
|     | <i>Oeu022479.1 / OeuTIP5;3</i>                                                                                        | <i>OleurTIP5;3a</i><br><i>OleurTIP5;3b</i>                                                                                                                                                         | <i>Oleur061Scf7085g01025.1 ; 145441.146632 (- strand)</i><br><i>Oleur061Scf2746g00014.1 ; 4573.5762 (- strand)</i>                                                                                                                                                                                                                                          |
|     | -                                                                                                                     | <i>OleurTIP1;1-related</i><br><i>OleurTIP2;4-related</i><br><i>OleurTIP3;1-related</i>                                                                                                             | <i>Oleur061Scf0505g01006.1 Incomplete sequence</i><br><i>Oleur061Scf6253g02001.1 Pseudogen (3'end reading frame shifted)</i><br><i>Oleur061Scf6179g00017.1 Incomplete sequence</i>                                                                                                                                                                          |
|     | <i>Oeu041020.1 / OeuTIP-related Incomplete sequence</i><br><i>Oeu007734.1 / OeuTIP1;3-related Incomplete sequence</i> | Similar to <i>OleurTIP1;2a</i><br>Similar to <i>OleurTIP1;3e</i>                                                                                                                                   | -                                                                                                                                                                                                                                                                                                                                                           |
|     | <i>Oeu050612.1 / OeuTIP2;1-related Pseudogene</i><br><i>Oeu000463.1 / OeuTIP2;2-related Incomplete sequence</i>       | <i>OleurTIP2-related</i><br><i>OleurTIP2-related</i>                                                                                                                                               | <i>Oleur061Scf3986g06001.1 Pseudogene</i><br><i>Oleur061Scf2246g01050.1 Incomplete sequence</i>                                                                                                                                                                                                                                                             |
|     | -                                                                                                                     | <i>OleurTIP1-related</i><br><i>OleurTIP1-related</i><br><i>OleurTIP1-related</i><br><i>OleurTIP2-related</i><br><i>OleurTIP2-related</i><br><i>OleurTIP4-related</i><br><i>OleurTIP5;1-related</i> | <i>Oleur061Scf2451g01004.1 Pseudogene</i><br><i>Oleur061Scf2960g01064.1 Pseudogene</i><br><i>Oleur061Scf6390g00005.1 Pseudogene</i><br><i>Oleur061Scf6342g00008.1 Incomplete sequence</i><br><i>Oleur061Scf2246g01050.1 Incomplete sequence</i><br><i>Oleur061Scf3307g00019.1 Incomplete sequence</i><br><i>Oleur061Scf0238g01010.1 Incomplete sequence</i> |
| XIP | <i>Oeu010056.1 / OeuXIP1;1</i>                                                                                        | <i>OleurXIP1;1a</i><br><i>OleurXIP1;1b</i>                                                                                                                                                         | <i>Oleur061Scf1407g06005.1 ; 601677.603499 (- strand)</i><br><i>Oleur061Scf4628g08012.1 ; 814896.816717 (+ strand)</i>                                                                                                                                                                                                                                      |
|     | <i>Oeu020684.1 / OeuXIP1;2</i>                                                                                        | <i>OleurXIP1;2a</i><br><i>OleurXIP1;2b</i>                                                                                                                                                         | <i>Oleur061Scf0694g04001.1 ; 467273.468886 (- strand)</i><br><i>Oleur061Scf0386g00009.1 ; 689.2303 (- strand)</i>                                                                                                                                                                                                                                           |
|     | <i>Oeu046122.1 / OeuXIP1;3</i>                                                                                        | <i>OleurXIP1;3-related</i><br><i>OleurXIP1;3</i>                                                                                                                                                   | <i>Oleur061Scf0258g01032.1 Pseudogene</i><br><i>Oleur061Scf1977g00011.1 ; 43695.44812 (- strand)</i>                                                                                                                                                                                                                                                        |
|     | -                                                                                                                     | <i>OleurXIP1;2-related</i><br><i>OleurXIP1;2-related</i><br><i>OleurXIP1;2-related</i><br><i>OleurXIP1;2-related</i><br><i>OleurXIP1;2-related</i><br><i>OleurXIP1;3-related</i>                   | <i>Oleur061Scf0147g01027.1 Incomplete sequence</i><br><i>Oleur061Scf5691g03006.1 Incomplete sequence</i><br><i>Oleur061Scf0694g03006.1 Pseudogene</i><br><i>Oleur061Scf0694g04008.1 Pseudogene</i><br><i>Oleur061Scf7513g00005.1 Pseudogene</i><br><i>Oleur061Scf9071g00003.1 Pseudogene</i><br><i>Oleur061Scf0258g01032.1 Pseudogene</i>                   |

|     |                                                                                            |                                                                                                                                                                                                                                                                                                       |                                                                                                                                                                                                                                                                                                                                                                                                                                                                         |
|-----|--------------------------------------------------------------------------------------------|-------------------------------------------------------------------------------------------------------------------------------------------------------------------------------------------------------------------------------------------------------------------------------------------------------|-------------------------------------------------------------------------------------------------------------------------------------------------------------------------------------------------------------------------------------------------------------------------------------------------------------------------------------------------------------------------------------------------------------------------------------------------------------------------|
| NIP | <i>Oeu060187.1 / OeuNIP1;1</i>                                                             | <i>OleurNIP1;1</i>                                                                                                                                                                                                                                                                                    | <i>Oleur061Scf1489g00038.1 ; 7790..10379 (+ strand)</i>                                                                                                                                                                                                                                                                                                                                                                                                                 |
|     | <i>Oeu040934.1 / OeuNIP1;2</i>                                                             | <i>OleurNIP1;2</i>                                                                                                                                                                                                                                                                                    | <i>Oleur061Scf2586g05026.1 ; 547390..550593 (- strand)</i>                                                                                                                                                                                                                                                                                                                                                                                                              |
|     | <i>Oeu039868.1 / OeuNIP1;3</i>                                                             | <i>OleurNIP1;3</i>                                                                                                                                                                                                                                                                                    | <i>Oleur061Scf0038g03004.1 ; 312314..314472 (- strand)</i>                                                                                                                                                                                                                                                                                                                                                                                                              |
|     | No hit Found                                                                               | <i>OleurNIP1;4</i>                                                                                                                                                                                                                                                                                    | <i>Oleur061Scf7194g00006.1 ; 25229..27368 (- strand)</i>                                                                                                                                                                                                                                                                                                                                                                                                                |
|     | <i>Oeu053221.1 / OeuNIP3;1</i>                                                             | <i>OleurNIP3;1</i>                                                                                                                                                                                                                                                                                    | <i>Oleur061Scf1427g05001.1 ; 489963..491438 (+ strand)</i>                                                                                                                                                                                                                                                                                                                                                                                                              |
|     | <i>Oeu047418.1 / OeuNIP4;1a</i>                                                            | <i>OleurNIP4;1a</i><br><i>OleurNIP4;1b</i>                                                                                                                                                                                                                                                            | <i>Oleur061Scf7805g00013.1 ; 30162..32022 (+ strand)</i><br><i>Oleur061Scf3669g01008.1 ; 165510..167403 (+ strand)</i>                                                                                                                                                                                                                                                                                                                                                  |
|     | <i>Oeu020545.1 / OeuNIP5;1</i>                                                             | <i>OleurNIP5;1a</i><br><i>OleurNIP5;1b</i>                                                                                                                                                                                                                                                            | <i>Oleur061Scf0098g04035.1 ; 449548..451350 (- strand)</i><br><i>Oleur061Scf3450g00011.1 ; 131943..133068 (- strand)</i>                                                                                                                                                                                                                                                                                                                                                |
|     | <i>Oeu046374.1 / OeuNIP5;2</i>                                                             | <i>OleurNIP5;2</i>                                                                                                                                                                                                                                                                                    | <i>Oleur061Scf1510g04020.1 ; 484673..488548 (- strand)</i>                                                                                                                                                                                                                                                                                                                                                                                                              |
|     | <i>Oeu017634.1 / OeuNIP5-related Pseudogene</i>                                            | <i>OleurNIP5;3</i>                                                                                                                                                                                                                                                                                    | <i>Oleur061Scf4242g00005.1 ; 66824..76868 (- strand)</i>                                                                                                                                                                                                                                                                                                                                                                                                                |
|     | <i>Oeu060126.1 / OeuNIP6;1</i><br><i>Oeu011481.1 / OeuNIP6-related Incomplete sequence</i> | <i>OleurNIP6;1</i>                                                                                                                                                                                                                                                                                    | <i>Oleur061Scf9039g00011.1 ; 119150..124645 (+ strand)</i>                                                                                                                                                                                                                                                                                                                                                                                                              |
|     | <i>Oeu037688.1 / OeuNIP7;1</i>                                                             | <i>OleurNIP7;1a</i><br><i>OleurNIP7;1b</i>                                                                                                                                                                                                                                                            | <i>Oleur061Scf4622g04016.1 ; 475742..477284 (+ strand)</i><br><i>Oleur061Scf1371g00022.1 ; 75020..76568 (- strand)</i>                                                                                                                                                                                                                                                                                                                                                  |
|     | <i>OeuNIP4;2-related Pseudogene</i>                                                        | <i>OleurNIP4;2-related</i>                                                                                                                                                                                                                                                                            | <i>Oleur061Scf0296g01014.1 Pseudogene</i>                                                                                                                                                                                                                                                                                                                                                                                                                               |
|     | <i>Oeu005264.1 / OeuNIP7-related Incomplete sequence</i>                                   | No hits found                                                                                                                                                                                                                                                                                         | -                                                                                                                                                                                                                                                                                                                                                                                                                                                                       |
|     | -                                                                                          | <i>OleurNIP1-related Pseudogene</i><br><i>OleurNIP1;1 related Pseudogene</i><br><i>OleurNIP1;1 related Pseudogene</i><br><i>OleurNIP1;1 related Pseudogene</i><br><i>OleurNIP-related</i><br><i>OleurNIP-related</i><br><i>OleurNIP-related</i><br><i>OleurNIP-related</i><br><i>OleurNIP-related</i> | <i>Oleur061Scf1489g00002.1 Incomplete sequence</i><br><i>Oleur061Scf0623g01004.1 Pseudogene</i><br><i>Oleur061Scf2586g05027.1 Pseudogene</i><br><i>Oleur061Scf4656g00032.1 Pseudogene</i><br><i>Oleur061Scf9166g08006.1 Incomplete sequence</i><br><i>Oleur061Scf2277g01043.1 Incomplete sequence</i><br><i>Oleur061Scf2277g01009.1 Incomplete sequence</i><br><i>Oleur061Scf2524g03003.1 Incomplete sequence</i><br><i>Oleur061Scf4639g00001.1 Incomplete sequence</i> |
| SIP | <i>Oeu050292.1 / OeuSIP1;1</i>                                                             | <i>OleurSIP1;1a</i><br><i>OleurSIP1;1b</i>                                                                                                                                                                                                                                                            | <i>Oleur061Scf4272g01002.1 ; 214508..224653 (+ strand)</i><br><i>Oleur061Scf2367g00017.1 ; 30689..40838 (- strand)</i>                                                                                                                                                                                                                                                                                                                                                  |
|     | <i>Oeu061896.1 / OeuSIP1-related Pseudogene</i>                                            | <i>OleurSIP1;3</i>                                                                                                                                                                                                                                                                                    | <i>Oleur061Scf0342g12031.1 ; 1258679..1261622 (- strand)</i>                                                                                                                                                                                                                                                                                                                                                                                                            |
|     | <i>Oeu014723.2 / OeuSIP1;2</i>                                                             | <i>OleurSIP1;2</i>                                                                                                                                                                                                                                                                                    | <i>Oleur061Scf0259g06030.1 ; 705305..709156 (+ strand)</i>                                                                                                                                                                                                                                                                                                                                                                                                              |
|     | <i>Oeu060749.1 / OeuSIP2;1</i>                                                             | <i>OleurSIP2;1a</i><br><i>OleurSIP2;1b</i>                                                                                                                                                                                                                                                            | <i>Oleur061Scf0186g06043.1 ; 651945..657348 (- strand)</i><br><i>Oleur061Scf5878g07063.1 ; Pseudogene</i>                                                                                                                                                                                                                                                                                                                                                               |
|     | <i>OeuChr11 / OeuSIP2;2</i>                                                                | <i>OleurSIP2;2</i>                                                                                                                                                                                                                                                                                    | <i>Oleur061Scf8348g02016.1 ; 245169..250426 (- strand)</i>                                                                                                                                                                                                                                                                                                                                                                                                              |
|     | -                                                                                          | <i>OleurSIP1;1-related</i>                                                                                                                                                                                                                                                                            | <i>Oleur061Scf1072g00019.1 Incomplete sequence</i>                                                                                                                                                                                                                                                                                                                                                                                                                      |
|     | <i>Oeu050293.1 / OeuSIP-related</i>                                                        | No hits found                                                                                                                                                                                                                                                                                         | -                                                                                                                                                                                                                                                                                                                                                                                                                                                                       |
