# Supplementary material for: Genome Wild Analysis and Molecular Understanding of the Aquaporin Diversity in Olive Trees (Olea Europaea L.)
Source: MDPI journal article supplement (doi:10.3390/ijms21114183), 2020-06-11
Supplement: s1 [file s1]

**Table S4.** Expression profile of *Oleu*AQP genes from the cultivated *Olea europaea* cv. Picual in different physiological conditions. *Oleu*AQsP are grouped by subfamily. *Oleu*AQP gene expressions were normalized in terms of reads per kilobase of transcript per million mapped reads (RPKM). Expression levels were displayed by the depth of red.

|                     |                     |                        | Organs/Tissues |        |      |          |      |      | Early development (months) |     |     |    |     |     | Root |     |     |     |      |     | Leaf |     |    |    |     |
|---------------------|---------------------|------------------------|----------------|--------|------|----------|------|------|----------------------------|-----|-----|----|-----|-----|------|-----|-----|-----|------|-----|------|-----|----|----|-----|
|                     |                     |                        | Fruit          | Flower | Leaf | Meristem | Root | Stem | 1                          | 2   | 3   | 4  | 5   | 6   | 0    | 8h  | 24h | 48h | 7d   | 48h | 7d   | 15d | 0  | 1d | 10d |
| AQP subfamilies     | OleuAQP name        | OleuAQP correspondence |                |        |      |          |      |      |                            |     |     |    |     |     |      |     |     |     |      |     |      |     |    |    |     |
| PIP1                | OleuPIP1.1abc       |                        | 84             | 46     | 42   | 68       | 16   | 23   | 25                         | 26  | 82  | 83 | 63  | 19  | 254  | 19  | 13  | 39  | 542  | 9   | 112  | 302 | 91 | 72 | 48  |
|                     | OleuPIP1.2a         | OleuPIP1.2             | 129            | 34     | 25   | 42       | 20   | 21   | 50                         | 24  | 60  | 76 | 41  | 16  | 165  | 46  | 23  | 127 | 1187 | 24  | 152  | 128 | 92 | 75 | 31  |
|                     | OleuPIP1.3a         |                        | 115            | 83     | 11   | 153      | 242  | 104  | 153                        | 242 | 210 | 55 | 104 | 385 | 403  | 290 | 32  | 292 | 335  | 144 | 241  | 184 | 41 | 38 | 15  |
|                     | OleuPIP1.3b         |                        | 93             | 137    | 22   | 24       | 264  | 116  | 48                         | 69  | 58  | 11 | 37  | 60  | 454  | 303 | 652 | 738 | 505  | 434 | 213  | 199 | 44 | 36 | 19  |
|                     | OleuPIP1.4a         |                        | 0              | 44     | 4    | 16       | 11   | 5    | 87                         | 32  | 63  | 75 | 60  | 15  | 89   | 21  | 29  | 9   | 48   | 3   | 9    | 53  | 52 | 22 | 10  |
|                     | OleuPIP1.4b         |                        | 9              | 79     | 6    | 22       | 9    | 9    | 8                          | 70  | 36  | 52 | 50  | 47  | 19   | 107 | 27  | 33  | 10   | 5   | 15   | 51  | 54 | 33 | 19  |
|                     | OleuPIP1.5a         | OleuPIP1.5             | 0              | 3      | 4    | 9        | 13   | 7    | 10                         | 23  | 52  | 22 | 32  | 36  | 26   | 7   | 5   | 3   | 6    | 1   | 3    | 19  | 42 | 28 | 24  |
|                     | OleuPIP1.5b         |                        | 0              | 45     | 2    | 8        | 6    | 5    | 22                         | 17  | 12  | 3  | 5   | 3   | 161  | 33  | 23  | 34  | 36   | 24  | 34   | 141 | 7  | 12 | 3   |
|                     | OleuPIP1.6          | OleuPIP1.6             | 1              | 16     | 7    | 7        | 3    | 5    | 2                          | 7   | 5   | 2  | 4   | 1   | 31   | 14  | 14  | 18  | 25   | 6   | 7    | 12  | 8  | 11 | 2   |
|                     | OleuPIP1.6b         |                        | 1              | 13     | 0    | 4        | 3    | 1    | 31                         | 13  | 14  | 6  | 7   | 5   | 37   | 10  | 13  | 15  | 26   | 4   | 4    | 12  | 7  | 8  | 2   |
|                     | Pseudogen           | -                      | 0              | 0      | 0    | 1        | 1    | 0    | 0                          | 0   | 0   | 0  | 0   | 0   | 0    | 0   | 0   | 0   | 0    | 0   | 0    | 0   | 0  | 0  | 0   |
|                     | Incomplete sequence | -                      | 0              | 0      | 0    | 0        | 0    | 0    | 0                          | 0   | 0   | 0  | 0   | 0   | 0    | 0   | 0   | 0   | 0    | 0   | 0    | 0   | 0  | 0  | 0   |
|                     | Incomplete sequence | -                      | 0              | 0      | 0    | 0        | 0    | 0    | 0                          | 0   | 0   | 0  | 0   | 0   | 0    | 0   | 0   | 0   | 0    | 0   | 0    | 0   | 0  | 0  | 0   |
|                     | Incomplete sequence | -                      | 0              | 0      | 0    | 0        | 0    | 0    | 0                          | 0   | 0   | 0  | 0   | 0   | 0    | 0   | 0   | 0   | 0    | 0   | 0    | 0   | 0  | 0  | 0   |
|                     | Incomplete sequence | -                      | 0              | 0      | 0    | 0        | 0    | 0    | 0                          | 0   | 0   | 0  | 0   | 0   | 0    | 0   | 0   | 0   | 0    | 0   | 0    | 0   | 0  | 0  | 0   |
|                     | Incomplete sequence | -                      | 0              | 0      | 0    | 0        | 0    | 0    | 0                          | 0   | 0   | 0  | 0   | 0   | 0    | 0   | 0   | 0   | 0    | 0   | 0    | 0   | 0  | 0  | 0   |
|                     | Incomplete sequence | -                      | 0              | 0      | 0    | 0        | 0    | 0    | 0                          | 0   | 0   | 0  | 0   | 0   | 0    | 0   | 0   | 0   | 0    | 0   | 0    | 0   | 0  | 0  | 0   |
|                     | Incomplete sequence | -                      | 0              | 0      | 0    | 0        | 0    | 0    | 0                          | 0   | 0   | 0  | 0   | 0   | 0    | 0   | 0   | 0   | 0    | 0   | 0    | 0   | 0  | 0  | 0   |
| Incomplete sequence | -                   | 0                      | 0              | 0      | 0    | 0        | 0    | 0    | 0                          | 0   | 0   | 0  | 0   | 0   | 0    | 0   | 0   | 0   | 0    | 0   | 0    | 0   | 0  | 0  |     |
| Incomplete sequence | -                   | 0                      | 0              | 0      | 0    | 0        | 0    | 0    | 0                          | 0   | 0   | 0  | 0   | 0   | 0    | 0   | 0   | 0   | 0    | 0   | 0    | 0   | 0  | 0  |     |
| Incomplete sequence | -                   | 0                      | 0              | 0      | 0    | 0        | 0    | 0    | 0                          | 0   | 0   | 0  | 0   | 0   | 0    | 0   | 0   | 0   | 0    | 0   | 0    | 0   | 0  | 0  |     |
| Incomplete sequence | -                   | 0                      | 0              | 0      | 0    | 0        | 0    | 0    | 0                          | 0   | 0   | 0  | 0   | 0   | 0    | 0   | 0   | 0   | 0    | 0   | 0    | 0   | 0  | 0  |     |
| Incomplete sequence | -                   | 0                      | 0              | 0      | 0    | 0        | 0    | 0    | 0                          | 0   | 0   | 0  | 0   | 0   | 0    | 0   | 0   | 0   | 0    | 0   | 0    | 0   | 0  | 0  |     |
| Incomplete sequence | -                   | 0                      | 0              | 0      | 0    | 0        | 0    | 0    | 0                          | 0   | 0   | 0  | 0   | 0   | 0    | 0   | 0   | 0   | 0    | 0   | 0    | 0   | 0  | 0  |     |
| Incomplete sequence | -                   | 0                      | 0              | 0      | 0    | 0        | 0    | 0    | 0                          | 0   | 0   | 0  | 0   | 0   | 0    | 0   | 0   | 0   | 0    | 0   | 0    | 0   | 0  | 0  |     |
| Incomplete sequence | -                   | 0                      | 0              | 0      | 0    | 0        | 0    | 0    | 0                          | 0   | 0   | 0  | 0   | 0   | 0    | 0   | 0   | 0   | 0    | 0   | 0    | 0   | 0  | 0  |     |
| Incomplete sequence | -                   | 0                      | 0              | 0      | 0    | 0        | 0    | 0    | 0                          | 0   | 0   | 0  | 0   | 0   | 0    | 0   | 0   | 0   | 0    | 0   | 0    | 0   | 0  | 0  |     |
| Incomplete sequence | -                   | 0                      | 0              | 0      | 0    | 0        | 0    | 0    | 0                          | 0   | 0   | 0  | 0   | 0   | 0    | 0   | 0   | 0   | 0    | 0   | 0    | 0   | 0  | 0  |     |
| Incomplete sequence | -                   | 0                      | 0              | 0      | 0    | 0        | 0    | 0    | 0                          | 0   | 0   | 0  | 0   | 0   | 0    | 0   | 0   | 0   | 0    | 0   | 0    | 0   | 0  | 0  |     |
| Incomplete sequence | -                   | 0                      | 0              | 0      | 0    | 0        | 0    | 0    | 0                          | 0   | 0   | 0  | 0   | 0   | 0    | 0   | 0   | 0   | 0    | 0   | 0    | 0   | 0  | 0  |     |
| Incomplete sequence | -                   | 0                      | 0              | 0      | 0    | 0        | 0    | 0    | 0                          | 0   | 0   | 0  | 0   | 0   | 0    | 0   | 0   | 0   | 0    | 0   | 0    | 0   | 0  | 0  |     |
| Incomplete sequence | -                   | 0                      | 0              | 0      | 0    | 0        | 0    | 0    | 0                          | 0   | 0   | 0  | 0   | 0   | 0    | 0   | 0   | 0   | 0    | 0   | 0    | 0   | 0  | 0  |     |
| Incomplete sequence | -                   | 0                      | 0              | 0      | 0    | 0        | 0    | 0    | 0                          | 0   | 0   | 0  | 0   | 0   | 0    | 0   | 0   | 0   | 0    | 0   | 0    | 0   | 0  | 0  |     |
| Incomplete sequence | -                   | 0                      | 0              | 0      | 0    | 0        | 0    | 0    | 0                          | 0   | 0   | 0  | 0   | 0   | 0    | 0   | 0   | 0   | 0    | 0   | 0    | 0   | 0  | 0  |     |
| Incomplete sequence | -                   | 0                      | 0              | 0      | 0    | 0        | 0    | 0    | 0                          | 0   | 0   | 0  | 0   | 0   | 0    | 0   | 0   | 0   | 0    | 0   | 0    | 0   | 0  | 0  |     |
| Incomplete sequence | -                   | 0                      | 0              | 0      | 0    | 0        | 0    | 0    | 0                          | 0   | 0   | 0  | 0   | 0   | 0    | 0   | 0   | 0   | 0    | 0   | 0    | 0   | 0  | 0  |     |
| Incomplete sequence | -                   | 0                      | 0              | 0      | 0    | 0        | 0    | 0    | 0                          | 0   | 0   | 0  | 0   | 0   | 0    | 0   | 0   | 0   | 0    | 0   | 0    | 0   | 0  | 0  |     |
| Incomplete sequence | -                   | 0                      | 0              | 0      | 0    | 0        | 0    | 0    | 0                          | 0   | 0   | 0  | 0   | 0   | 0    | 0   | 0   | 0   | 0    | 0   | 0    | 0   | 0  | 0  |     |
| Incomplete sequence | -                   | 0                      | 0              | 0      | 0    | 0        | 0    | 0    | 0                          | 0   | 0   | 0  | 0   | 0   | 0    | 0   | 0   | 0   | 0    | 0   | 0    | 0   | 0  | 0  |     |
| Incomplete sequence | -                   | 0                      | 0              | 0      | 0    | 0        | 0    | 0    | 0                          | 0   | 0   | 0  | 0   | 0   | 0    | 0   | 0   | 0   | 0    | 0   | 0    | 0   | 0  | 0  |     |
| Incomplete sequence | -                   | 0                      | 0              | 0      | 0    | 0        | 0    | 0    | 0                          | 0   | 0   | 0  | 0   | 0   | 0    | 0   | 0   | 0   | 0    | 0   | 0    | 0   | 0  | 0  |     |
| Incomplete sequence | -                   | 0                      | 0              | 0      | 0    | 0        | 0    | 0    | 0                          | 0   | 0   | 0  | 0   | 0   | 0    | 0   | 0   | 0   | 0    | 0   | 0    | 0   | 0  | 0  |     |
| Incomplete sequence | -                   | 0                      | 0              | 0      | 0    | 0        | 0    | 0    | 0                          | 0   | 0   | 0  | 0   | 0   | 0    | 0   | 0   | 0   | 0    | 0   | 0    | 0   | 0  | 0  |     |
| Incomplete sequence | -                   | 0                      | 0              | 0      | 0    | 0        | 0    | 0    | 0                          | 0   | 0   | 0  | 0   | 0   | 0    | 0   | 0   | 0   | 0    | 0   | 0    | 0   | 0  | 0  |     |
| Incomplete sequence | -                   | 0                      | 0              | 0      | 0    | 0        | 0    | 0    | 0                          | 0   | 0   | 0  | 0   | 0   | 0    | 0   | 0   | 0   | 0    | 0   | 0    | 0   | 0  | 0  |     |
| Incomplete sequence | -                   | 0                      | 0              | 0      | 0    | 0        | 0    | 0    | 0                          | 0   | 0   | 0  | 0   | 0   | 0    | 0   | 0   | 0   | 0    | 0   | 0    | 0   | 0  | 0  |     |
| Incomplete sequence | -                   | 0                      | 0              | 0      | 0    | 0        | 0    | 0    | 0                          | 0   | 0   | 0  | 0   | 0   | 0    | 0   | 0   | 0   | 0    | 0   | 0    | 0   | 0  | 0  |     |
| Incomplete sequence | -                   | 0                      | 0              | 0      | 0    | 0        | 0    | 0    | 0                          | 0   | 0   | 0  | 0   | 0   | 0    | 0   | 0   | 0   | 0    | 0   | 0    | 0   | 0  | 0  |     |
| Incomplete sequence | -                   | 0                      | 0              | 0      | 0    | 0        | 0    | 0    | 0                          | 0   | 0   | 0  | 0   | 0   | 0    | 0   | 0   | 0   | 0    | 0   | 0    | 0   | 0  | 0  |     |
| Incomplete sequence | -                   | 0                      | 0              | 0      | 0    | 0        | 0    | 0    | 0                          | 0   | 0   | 0  | 0   | 0   | 0    | 0   | 0   | 0   | 0    | 0   | 0    | 0   | 0  | 0  |     |
| Incomplete sequence | -                   | 0                      | 0              | 0      | 0    | 0        | 0    | 0    | 0                          | 0   | 0   | 0  | 0   | 0   | 0    | 0   | 0   | 0   | 0    | 0   | 0    | 0   | 0  | 0  |     |
| Incomplete sequence | -                   | 0                      | 0              | 0      | 0    | 0        | 0    | 0    | 0                          | 0   | 0   | 0  | 0   | 0   | 0    | 0   | 0   | 0   | 0    | 0   | 0    | 0   | 0  | 0  |     |
| Incomplete sequence | -                   | 0                      | 0              | 0      | 0    | 0        | 0    | 0    | 0                          | 0   | 0   | 0  | 0   | 0   | 0    | 0   | 0   | 0   | 0    | 0   | 0    | 0   | 0  | 0  |     |
| Incomplete sequence | -                   | 0                      | 0              | 0      | 0    | 0        | 0    | 0    | 0                          | 0   | 0   | 0  | 0   | 0   | 0    | 0   | 0   | 0   | 0    | 0   | 0    | 0   | 0  | 0  |     |
| Incomplete sequence | -                   | 0                      | 0              | 0      | 0    | 0        | 0    | 0    | 0                          | 0   | 0   | 0  | 0   | 0   | 0    | 0   | 0   | 0   | 0    | 0   | 0    | 0   | 0  | 0  |     |
| Incomplete sequence | -                   | 0                      | 0              | 0      | 0    | 0        | 0    | 0    | 0                          | 0   | 0   | 0  | 0   | 0   | 0    | 0   | 0   | 0   | 0    | 0   | 0    | 0   | 0  | 0  |     |
| Incomplete sequence | -                   | 0                      | 0              | 0      | 0    | 0        | 0    | 0    | 0                          | 0   | 0   | 0  | 0   | 0   | 0    | 0   | 0   | 0   | 0    | 0   | 0    | 0   | 0  | 0  |     |
| Incomplete sequence | -                   | 0                      | 0              | 0      | 0    | 0        | 0    | 0    | 0                          | 0   | 0   | 0  | 0   | 0   | 0    | 0   | 0   | 0   | 0    | 0   | 0    | 0   | 0  | 0  |     |
| Incomplete sequence | -                   | 0                      | 0              | 0      | 0    | 0        | 0    | 0    | 0                          | 0   | 0   | 0  | 0   | 0   | 0    | 0   | 0   | 0   | 0    | 0   | 0    | 0   | 0  | 0  |     |
| Incomplete sequence | -                   | 0                      | 0              | 0      | 0    | 0        | 0    | 0    | 0                          | 0   | 0   | 0  | 0   | 0   | 0    | 0   | 0   | 0   | 0    | 0   | 0    | 0   | 0  | 0  |     |
| Incomplete sequence | -                   | 0                      | 0              | 0      | 0    | 0        | 0    | 0    | 0                          | 0   | 0   | 0  | 0   | 0   | 0    | 0   | 0   | 0   | 0    | 0   | 0    | 0   | 0  | 0  |     |
| Incomplete sequence | -                   | 0                      | 0              | 0      | 0    | 0        | 0    | 0    | 0                          | 0   | 0   | 0  | 0   | 0   | 0    | 0   | 0   | 0   | 0    | 0   | 0    | 0   | 0  | 0  |     |
| Incomplete sequence | -                   | 0                      | 0              | 0      | 0    | 0        | 0    | 0    | 0                          | 0   | 0   | 0  | 0   | 0   | 0    | 0   | 0   | 0   | 0    | 0   | 0    | 0   | 0  | 0  |     |
| Incomplete sequence | -                   | 0                      | 0              | 0      | 0    | 0        | 0    | 0    | 0                          | 0   | 0   | 0  | 0   | 0   | 0    | 0   | 0   | 0   | 0    | 0   | 0    | 0   | 0  | 0  |     |
| Incomplete sequence | -                   | 0                      | 0              | 0      | 0    | 0        | 0    | 0    | 0                          | 0   | 0   | 0  | 0   | 0   | 0    | 0   | 0   | 0   | 0    | 0   | 0    | 0   | 0  | 0  |     |
| Incomplete sequence | -                   | 0                      | 0              | 0      | 0    | 0        | 0    | 0    | 0                          | 0   | 0   | 0  | 0   | 0   | 0    | 0   | 0   | 0   | 0    | 0   | 0    | 0   | 0  | 0  |     |
| Incomplete sequence | -                   | 0                      | 0              | 0      | 0    | 0        | 0    | 0    | 0                          | 0   | 0   | 0  | 0   | 0   | 0    | 0   | 0   | 0   | 0    | 0   | 0    | 0   | 0  | 0  |     |
| Incomplete sequence | -                   | 0                      | 0              | 0      | 0    | 0        | 0    | 0    | 0                          | 0   | 0   | 0  | 0   | 0   | 0    | 0   | 0   | 0   | 0    | 0   | 0    | 0   | 0  | 0  |     |
| Incomplete sequence | -                   | 0                      | 0              | 0      | 0    | 0        | 0    | 0    | 0                          | 0   | 0   | 0  | 0   | 0   | 0    |     |     |     |      |     |      |     |    |    |     |
