# Supplementary material for: Genome Wild Analysis and Molecular Understanding of the Aquaporin Diversity in Olive Trees (Olea Europaea L.)
Source: MDPI journal article supplement (doi:10.3390/ijms21114183), 2020-06-11
Supplement: s1 [file s1]

**Table S1.** Nomenclatures of *Oeu*APQ sequences from the wild olive specie *Olea europaea* var. *sylvestris*.  
*Oeu*AQP sequences (genomic, CDS and protein) are detailed in Supplemental FigureS1

| MIP Subclasses | Phytozom loci ("Pseudogenes" in red)                          | UniProtKB - <i>Olea europaea</i> * Secchi et al., 2007 | Location                      | Nucleotide location (location corrected in red, if necessary) | Remarks                                                            |
|----------------|---------------------------------------------------------------|--------------------------------------------------------|-------------------------------|---------------------------------------------------------------|--------------------------------------------------------------------|
| PIP1           | <i>Oeu038800.1</i><br><i>Oeu</i> PIP1;1a                      | A0A385A1M4 / A0A385A1N7<br>GN=PIP1.1<br>ABB13429.1*    | chr19                         | 7203994..7205679 forward                                      | Exon 1 extended with 63n                                           |
|                | <i>Oeu038801.1</i><br><i>Oeu</i> PIP1;1b                      | A0A385A1M4 / A0A385A1N7<br>GN=PIP1.1<br>ABB13429.1*    | chr19                         | 7208573..7210258 reverse                                      | Exon 1 extended with 63n                                           |
|                | <i>Oeu038802.2</i><br><i>Oeu</i> PIP1;1c                      | A0A385A1M4 / A0A385A1N7<br>GN=PIP1.1<br>ABB13429.1*    | chr19                         | 7217774..7219459 forward                                      | Exon 1 extended with 63n                                           |
|                | <i>Oeu018133.1</i><br><i>Oeu</i> PIP1;2                       | A0A1D5AHZ6<br>GN=PIP1.2                                | scaffold17619                 | 410..2065 forward                                             | -                                                                  |
|                | <i>Oeu042329.1</i><br><i>Oeu</i> PIP1;3                       | A0A1D5AHZ7<br>GN=PIP1.3                                | chr13                         | 11012950..11015602 forward                                    | -                                                                  |
|                | <i>Oeu052954.1</i><br><i>Oeu</i> PIP1;4                       | -                                                      | chr3                          | 21471493..21473698 reverse                                    | -                                                                  |
|                | <i>Oeu061384.2</i><br><i>Oeu</i> PIP1;5                       | -                                                      | scaffold87                    | 524214..526575 reverse                                        | Third predicted Exon as part of the second intron                  |
|                | <i>Oeu046350.1</i><br><i>Oeu</i> PIP1;6                       | -                                                      | scaffold4751                  | 4496..7173 forward                                            | -                                                                  |
|                | <i>Oeu022396.1</i><br><i>Oeu</i> PIP1-related                 | -                                                      | scaffold1994                  | 48682..48948 forward                                          | Incomplete sequence                                                |
|                | <i>Oeu010785.1</i><br><i>Oeu</i> PIP1-related                 | -                                                      | chr3                          | 8511236..8513098 reverse                                      | Incomplete sequence                                                |
|                | <i>Oeu019177.1</i><br><i>Oeu</i> PIP1-related                 | -                                                      | chr8                          | 2118675..2120753 reverse                                      | Incomplete sequence                                                |
|                | <i>Oeu018831.2</i><br><i>Oeu</i> PIP1-related                 | -                                                      | chr4                          | 15354575..15359491 forward                                    | Incomplete sequence                                                |
| PIP2           | <i>Oeu030183.1</i><br><i>Oeu</i> PIP2;1                       | Q38PG7 / ABB13430.2*                                   | chr4                          | 8070191..8071649 reverse                                      | -                                                                  |
|                | <i>Oeu001271.1</i><br><i>Oeu</i> PIP2;2                       | -                                                      | scaffold1031                  | 177815..179775 reverse                                        | -                                                                  |
|                | <i>Oeu033842.1</i><br><i>Oeu</i> PIP2;3                       | -                                                      | chr12                         | 7848155..7849789 reverse                                      | -                                                                  |
|                | <i>Oeu030439.1</i><br><i>Oeu</i> PIP2;4                       | -                                                      | scaffold2530                  | 66057..67614 forward                                          | -                                                                  |
|                | <i>Oeu027987.1</i><br><i>Oeu</i> PIP2;5                       | -                                                      | scaffold2335                  | 58720..59930 reverse                                          | -                                                                  |
|                | <i>Oeu017257.1</i><br><i>Oeu</i> PIP2;6                       | -                                                      | chr6                          | 11700750..11703098 forward                                    | -                                                                  |
|                | <i>Oeu018111.1</i><br><i>Oeu</i> PIP2;7                       | -                                                      | scaffold176                   | 1251179..1252336 forward                                      | -                                                                  |
|                | <i>Oeu023232.1</i><br><i>Oeu</i> PIP2;8                       | -                                                      | scaffold20321                 | 54..1165 reverse                                              | Exon 1 extended in its 5'end with 84n                              |
|                | <i>Oeu020106.1</i> /scaffold870<br><i>Oeu</i> PIP2;9          | -                                                      | scaffold18654<br>scaffold870  | 1671..2018 forward<br>312817..313578 forward                  | linking between 2 scaffolds                                        |
|                | <i>Oeu022438.1</i> /scaffold2530<br><i>Oeu</i> PIP2;10        | -                                                      | scaffold19979<br>scaffold2530 | 1..1328 reverse                                               | 5' end extended with 66n<br>3' end extended with the scaffold 2530 |
|                | <i>Oeu017254.1</i> / <i>Oeu017256.1</i><br><i>Oeu</i> PIP2;11 | -                                                      | chr6                          | 11625929..11647223 forward                                    | PIP sequence cleaved by 21268n<br>including <i>Oeu17255</i> gene   |
|                | <i>Oeu059136.1</i><br><i>Oeu</i> PIP2-related                 | -                                                      | chr10                         | 15785080..15785518 reverse                                    | Incomplete sequence                                                |
| TIP            | <i>Oeu058531.1</i><br><i>Oeu</i> TIP1;1                       | Q2XVV9 / ABB76813.1*<br>GN=TIP                         | chr22                         | 3077808..3078742 forward                                      | -                                                                  |
|                | <i>Oeu041014.1</i><br><i>Oeu</i> TIP1;2                       | A0A1C8V910<br>GN=TIP1.2                                | chr20                         | 11814751..11816218 reverse                                    | -                                                                  |
|                | <i>Oeu035479.1</i><br><i>Oeu</i> TIP1;3                       | A0A1D5AHZ9<br>GN=TIP1.3                                | scaffold3011                  | 24603..25462 forward                                          | -                                                                  |
|                | <i>Oeu040290.1</i><br><i>Oeu</i> TIP1;4                       | -                                                      | chr4                          | 16254381..16255311 reverse                                    | -                                                                  |
|                | <i>Oeu040289.1</i><br><i>Oeu</i> TIP1;5                       | -                                                      | chr4                          | 16257013..16257943 reverse                                    | -                                                                  |
|                | <i>Oeu033244.1</i><br><i>Oeu</i> TIP1;6                       | -                                                      | scaffold2789                  | 55535..57322 forward                                          | -                                                                  |
|                | <i>Oeu045237.1</i><br><i>Oeu</i> TIP1;7                       | -                                                      | chr11                         | 5861757..5862731 reverse                                      | 2059n were removed at the 5' extremity                             |
|                | <i>Oeu024074.1</i><br><i>Oeu</i> TIP2;1                       | -                                                      | chr2                          | 21805437..21806390 reverse                                    | -                                                                  |
|                | <i>Oeu024076.1</i><br><i>Oeu</i> TIP2;2                       | -                                                      | chr2                          | 21795643..21796596 reverse                                    | -                                                                  |
|                | <i>Oeu053988.1</i><br><i>Oeu</i> TIP2;3                       | -                                                      | chr22                         | 5185229..5186864 forward                                      | -                                                                  |
|                | <i>Oeu002329.1</i><br><i>Oeu</i> TIP2;4                       | -                                                      | chr13                         | 8623502..8625525 reverse                                      | -                                                                  |
|                | <i>Oeu040207.1</i><br><i>Oeu</i> TIP2;5                       | -                                                      | chr19                         | 9881246..9883023 forward                                      | Intron 3 converted in exon                                         |
|                | <i>Oeu038387.1</i><br><i>Oeu</i> TIP3;1                       | -                                                      | chr10                         | 29024107..29025120 forward                                    | -                                                                  |
|                | <i>Oeu030229.1</i> - <i>Oeu036364.1</i><br><i>Oeu</i> TIP4;1  | -                                                      | scaffold25131<br>scaffold311  | 282..785 reverse<br>584778..587098 forward                    | -                                                                  |
|                | <i>Oeu021708.1</i><br><i>Oeu</i> TIP5;1                       | -                                                      | chr12                         | 21524153..21525389 reverse                                    | -                                                                  |
|                | <i>Oeu021709.1</i><br><i>Oeu</i> TIP5;2                       | -                                                      | chr12                         | 21526411..21527647 reverse                                    | -                                                                  |
|                | <i>Oeu022479.1</i><br><i>Oeu</i> TIP5;3                       | -                                                      | chr1                          | 6772133..6773251 reverse                                      | -                                                                  |
|                | <i>Oeu041020.1</i><br><i>Oeu</i> TIP-related                  | -                                                      | chr20                         | 11792223..11792531 for                                        | Incomplete sequence                                                |
|                | <i>Oeu007734.1</i><br><i>Oeu</i> TIP1;3-related               | -                                                      | chr4                          | 20127443..20127820 reverse                                    | Incomplete sequence                                                |
|                | <i>Oeu000463.1</i><br><i>Oeu</i> TIP2;2-related               | -                                                      | chr17                         | 6142042..6142582 forward                                      | Incomplete sequence                                                |
|                | <i>Oeu050612.1</i><br><i>Oeu</i> TIP2;1-related               | -                                                      | chr18                         | 23502061..23503102 forward                                    | Pseudogene                                                         |

|     |                                                 |                  |               |                                            |                                                                                                  |
|-----|-------------------------------------------------|------------------|---------------|--------------------------------------------|--------------------------------------------------------------------------------------------------|
| XIP | <b>Oeu010056.1</b><br><i>OeuXIP1;1</i>          | -                | chr3          | 335356..336578 forward                     | Exon 1 extended with 21n                                                                         |
|     | <b>Oeu020684.1</b><br><i>OeuXIP1;1</i>          | -                | chr5          | 9245927.. <b>9248997</b> reverse           | Extended in 5' with 1455n                                                                        |
|     | <b>Oeu046122.1</b><br><i>OeuXIP1;3</i>          | -                | chr16         | 11367503.. <b>11369530</b> reverse         | Extended in 5'                                                                                   |
| NIP | <b>Oeu060187.1</b><br><i>OeuNIP1;1</i>          | -                | chr21         | 7140088..7142220 forward                   | -                                                                                                |
|     | <b>Oeu040934.1</b><br><i>OeuNIP1;2</i>          | -                | chr13         | <b>1731124</b> ..1733943 forward           | 5' extended with 2042n,<br>generating 3 exons and 3 introns.                                     |
|     | <b>Oeu039868.1</b><br><i>OeuNIP1;3</i>          | -                | chr16         | <b>12429545</b> .. <b>12432818</b> reverse | 5' extended with 792n<br>3' truncated of 246n<br>Intron/exon readjusted                          |
|     | <b>Oeu053221.1a</b><br><i>OeuNIP3;1</i>         | -                | Scaffold 635  | <b>392813</b> .. <b>394288</b> forward     | -                                                                                                |
|     | <b>Oeu047418.1</b><br><i>OeuNIP4;1</i>          | -                | chr18         | 8000311..8001846 forward                   | -                                                                                                |
|     | <b>Oeu020545.1</b><br><i>OeuNIP5;1</i>          | -                | chr18         | 6958376..6972407 forward                   | -                                                                                                |
|     | <b>Oeu046374.1</b><br><i>OeuNIP5;2</i>          | -                | scaffold476   | 396474..398858 forward                     | -                                                                                                |
|     | <b>Oeu060126.1</b><br><i>OeuNIP6;1</i>          | -                | scaffold830   | 250629..252602 forward                     | -                                                                                                |
|     | <b>Oeu011481.1</b><br><i>OeuNIP6-related</i>    | -                | scaffold14354 | 165..1696 reverse                          | Incomplete in 3' end                                                                             |
|     | <b>Oeu037688.1</b><br><i>OeuNIP7;1</i>          | -                | chr4          | <b>6837162</b> ..6838876 forward           | 1841n removed at the 5' end<br>Intron/exon redesigned by homology with<br>Oleu061Scf4622g04016.1 |
|     | <b>Oeu053221.1b</b><br><i>OeuNIP3;1-related</i> | -                | Scaffold 635  | <b>402535</b> .. <b>403011</b> forward     | Incomplete sequence<br>End of the Scaffold635                                                    |
|     | <b>OeuChr8</b><br><i>OeuNIP4;2-related</i>      | -                | chr8          | 17852182..17858508 forward                 | Sequence non-annotated in Phytozome database<br>Incomplete sequence                              |
|     | <b>Oeu053221.1b</b><br><i>OeuNIP1-related</i>   | -                | scaffold635   | 402535..403011 forward                     | Incomplete sequence<br>3' end stopped by an other gene                                           |
|     | <b>Oeu017634.1</b><br><i>OeuNIP5-related</i>    | -                | scaffold1737  | 102936..103291 forward                     | Incomplete sequence                                                                              |
|     | <b>Oeu005264.1</b><br><i>OeuNIP7-related</i>    | -                | scaffold11917 | 939..1312 reverse                          | Incomplete sequence                                                                              |
| SIP | <b>Oeu060749.1</b><br><i>OeuSIP2;1</i>          | B0L1W3<br>SIP1.1 | chr9          | 9170322.. <b>9172494</b> forward           | CDS elongated in 3'<br>(intron + exon) with 261n                                                 |
|     | <b>OeuChr11</b><br><i>OeuSIP2;2</i>             | B5KGP0<br>SIP1.2 | chr11         | 18362597..18364222 reverse                 | Sequence non-annotated in Phytozome database                                                     |
|     | <b>Oeu050292.1</b><br><i>OeuSIP1;1</i>          | -                | chr4          | 9340524..9350151 reverse                   | -                                                                                                |
|     | <b>Oeu014723.2</b><br><i>OeuSIP1;2</i>          | -                | scaffold1584  | 16236..19503 reverse                       | -                                                                                                |
|     | <b>Oeu061896.1</b><br><i>OeuSIP1-related</i>    | -                | chr22         | 4366217..4368873 forward                   | Pseudogene<br>(Oleu061Scf0342g12031.1 homolog )                                                  |
|     | <b>Oeu050293.1</b><br><i>OeuSIP-related</i>     | -                | chr4          | 9356974..9357960 reverse                   | Incomplete sequence<br>Intron 2 and Exon 3 truncated                                             |
