# Supplementary material for: Genome Wild Analysis and Molecular Understanding of the Aquaporin Diversity in Olive Trees (Olea Europaea L.)
Source: MDPI journal article supplement (doi:10.3390/ijms21114183), 2020-06-11
Supplement: s1 [file s1]

**Figure S3.** Deduced protein sequences of *Fraex*AQPs from *Fraxinus excelsior*. Sequences are listed according to their subfamilies. Pseudogenes and/or incomplete sequences are listed at the end of the document.

```
>FraexPIP1;1 FRAEX38873_v2_000016990.1
MESKEEDVRVGANKFNERQPIGTAAQSQDKDYKEPPPAPLFEPEGELSSWSFYRAGIAEFITFLFLYITVLTVMG
VSKSDSKCKTVGIQGIAWAFGGMIFALVYCTAGISGGHINPAVTFGLFLARKLSLTRAIFYMVMQCLGAICGAGV
VKGFGKTLTYMTKGGGANVVPAGYTKGDGLGAEIIGTFVLVYTVFSATDAKRSARDSHVPILAPLPIGFAVFLVHL
ATIPITGTGINPARSLGAIIYNKDHAWDDHWIFWVGPFIGAALAALYHVVVIRAIIPFKKISDDTKASSICGH
>FraexPIP1;2 FRAEX38873_v2_000126390.1
MESKEEDVRVGANKFNERQPIGTAAQSQDKDYKEPPPAPLFEPEGELSSWSFYRAGIAEFITFLFLYITILTVMG
VSKSDSKCKTVGIQGIAWAFGGMIFALVYCTAGISGGHINPAVTFGLFLARKLSLTRAIFYMVMQCLGAICGAGV
VKGFGKTLTYMTKGGGANVVPAGYTKGDGLGAEIIGTFVLVYTVFSATDAKRSARDSHVPILAPLPIGFAVFLVHL
ATIPITGTGINPARSLGAIIYNKDHAWDDHWIFWVGPFVGAALAALYHVVVIRAIIPFKNK
>FraexPIP1;3 FRAEX38873_v2_000177250.2 (corrected)
MAESKEEDVRLGANKFTERQPLGTAAQTDKDYKEPPPAPLFEPEGELTSWSFYRAGIAEFITFLFLYISILTVMG
VLSAKNKCASVGVQGIAWAFGGMIFVLVYCTAGISGGHINPAVTFGLFLARKLSLTRAIFYMVMQCLGAICGAGV
VKGFMKGQYGRLOGGANIVQHGYTKGDGLGAEIIGTFVLVYTVFSATDAKRNARDSHVPPLAPLPIGFAVFLVHL
ATIPITGTGINPARSLGAIIYNKDHAWDDQWVFWVGPFIGAALAALYHQIVIRAIIPFKSRA
>FraexPIP1;4 FRAEX38873_v2_000264300.1
MAENREEDVRLGANKFAEKQPLGTAAQTDKDYKEPPPAPLFEPEGELKSWSFYRAGIAEFVATFLFLYITILTVMG
VGRSQNKCASVGIQGIAWSFGGMIFALVYCTAGISGGHINPAVTFGLFLARKLSLTRAIFYIVMQCLGAICGAGV
VKGFMGEPYQRLQGGANMVQHGYTKGDGLGAEIIGTFILVYTVLSATDAKRNARDSHVPILAPLPIGFAVFLVHL
ATIPITGTGINPARSLGAIIYNKEHAWNDHWIFWVGPFIGAALAALYHQIVIRAIIPFKSSRAC
>FraexPIP1;5 FRAEX38873_v2_000319900.1 (corrected)
MAENREEDVRLGANKFAEKQPLGTAAQTDKDYKEPPPAPLFEPEGELKSWSFYRAGIAEFVATFLFLYITILTVMG
VGRSNSKSCASVGIQGIAWSFGGMIFALVYCTAGISGGHINPAVTFGLFLARKLSLTRAIFYIVMQCLGAICGAGV
VKGFMGEPYQRLQGGANFMQHGYTKGDGLGAEIIGTFILVYTVFSATDAKRNARDSHVPPLAPLPIGFAVFLVHL
ATIPITGTGINPARSLGAIIYNRDHAWDDHWIFWVGPFVGAALAALYHQIVIRAIIPFKSSQAC
>FraexPIP1;6 FRAEX38873_v2_000183090.1
MEGKEEDVRLGANKFTERQPLGTSAQSKDYKEPPPAPLFEPEGELQSWSFWRAGIAEFMATFLFLYITILTVMGVS
RSGSKCASVGIQGIAWAFGGMIFALVYCTAGISGGHINPAVTFGLFLARKLSLTRAIFYIVMQCLGAICGAGVVK
GFQPSYKANGGGGANVVAHGYYTKGDGLGAEIIGTFVLVYTVFSATDAKRSARDSHVPILAPLPIGFAVFLVHLAT
IPITGTGINPARSLGAIIYNKDHAWDDHWIFWVGPFIGAALAALYHQVIRAIIPFKSGS
>FraexPIP2;1 FRAEX38873_v2_000206040.1
MTKEFESHVEPAEEYSTKDYHDPPLIDAEELSSWSFYRAIIAEFVATLLFLYITVLTVIGYKSQIDPAHSGD
DCDGVGILGIAWAFGGMIFILVYCTAGISGGHINPAVTFGLFLARKVSLIRAVLYMVAQCLGAICGVLVKAFQK
AYFNRYGGGANELAPGYNKGVLGAEIIGTFVLVYTVFSATDPKRNARDSHVPVLAPLPIGFAVFMVHLATIPIT
GTGINPARSFGAAVIYNKDKAWDDHWIFWVGPFVGAALIAALYHQYILRAGAIKAMGSFRSNA
>FraexPIP2;2
MAKGVGVVEHGSFTAKDYHDPPLIDAEELTKWSFYRAVIAEFITLLFLYITVLTVIGYKSQIDTTAGHGGD
QCGGVGILGIAWAFGGMIFVLVYCTAGISGGHINPAVTFGLFLARKVSMIRAVIYMVAQCLGAICGVALVKALHK
SNYKKYGGGANQLADGYSAGGLAAEIIIGTFVLVYTVFTATDPKRKARDTHVPVLAPLPIGFAVFMVHLATIPIT
GTGINPARSFGAAWIFWVGPFIGAIIAAFYHQYILRAAIIKALGSFRSNN*
>FraexPIP2;3 FRAEX38873_v2_000084870.1
MVKDVGLAEHGSFTAKDYHDPPLIDAEELSKWSFYRAVIAEFITLLFLYITVLTVIGYKSQTDTNAGHVGD
QCGGVGILGIAWAFGGMIFVLVYCTAGISGGHINPAVTFGLFLARKVSMIRAIMYMVAQCLGAICGVLVKAFQK
SYYKKYGGGANEVADGYSNRVGLSAEIIIGTFVLVYTVFSATDPKRSARDSHVPVLAPLPIGFAVFMVHLATIPIT
GTGINPARSFGAAVIYNQEKAWDDQWIFWVGPFIGAIIAAFYHQFILRAGAVKALGSFRSSSRV
>FraexPIP2;4 FRAEX38873_v2_000295860.1
MAKGVGVVEHGSFTAKDYHDPPLIDAEELTKWSFYRAVIAEFITLLFLYITVLTVIGYKSQIDTTAGHGGD
QCGGVGILGIAWAFGGMIFVLVYCTAGISGGHINPAVTFGLFLARKVSMIRAVIYMVAQCLGAICGVALVKALHK
SNYKKYGGGANQLADGYSAGGLAAEIIIGTFVLVYTVFTATDPKRKARDTHVPVLAPLPIGFAVFMVHLATIPIT
GTGINPARSLGAAVIYNQEKAWDDQWIFWVGPFIGAIIAAFYHQFILRAGAVKALGSFRSSSHV
>FraexPIP2;5 FRAEX38873_v2_000071150.1
MGKDVEVGAEYTTKDYQDPPALLIDPEELTKWSFYRAIIAEFITLLFLYITVLTVIGYKSQSAADECGGVGIL
GIAWAFGGMIFILVYCTAGISGGHINPAVTLGLFLARKVSLIRAIMYMVAQCLGAICGGLVKAFQKSYVVKFGG
GANGLAEGYSNGTGLAAEIIIGTFVLVYTVFSATDPKRNARDSHVPVLAPLPIGFAVFMVHLATIPITGTGINPAR
SLGAAVIYGKDEAWDDQWIFWVGPFIGAIIAAFYHQYILRAGAVKALGSFRSTAY
```

>FraexPIP2;6 FRAEX38873\_v2\_000148890.1

MTKDAGVAEHGSFTAKDYHDPAPPLIDAKELTKWSFYRALIAEFVATLLFLYITVLTVIGYKSQIDTDLNGDQC  
GGVGILGIAWAFGGMIFILVYCTAGISGGHINPAVTFGLFLARKVSLIRAVMYMVAQCLGAICGVGLVKAFQKSY  
YKKYGGGANELADGISTGVGLAAEIIIGTFVLVYTVFSATDPKRSARDSHVPVLAPLPIGFAVFMVHLATIPITGT  
GINPARSLGAAVIYDQDKAWDDHWIFWVGPFIGAATAAFYHQFILRAGAVKALGSFRSNASHH

>FraexPIP2;7 FRAEX38873\_v2\_000322410.1

MAKGIEVGDPEFTAKDYQDPPAPPLIDPEELTKWSFYRAIIAEFIATLLFLYITVLTVIGYKSQSATDECGGVGI  
LGIAWAFGGMIFVLVYCTAGISGGHINPAVTFGLFLARKVSLIRAIMYMAQCLGAICGGLVKAFQRAYVRYG  
GGANGLEVGYSTGTGLAAEIIIGTFVLVYTVFSATDPKRSARDSHVPVLAPLPIGFAVFMVHLATIPITGTGINPA  
RSFGAAVIYKDKAWDDQWIFWAGPFIGAAIAAFYHQYILRAGAVKALGSFRSSASAY

>FraexPIP2;8 FRAEX38873\_v2\_000236920.1

MTKEVIEEGHVHSDVKDYEDPPAPFLDMGELMLWSFYRAIIAEFVATLLFLYVTVATVIGHKKLNAADQCDGVG  
ILGIAWAFGGMIFILVYCTAGISGGHINPAVTFGLFLARKVSLIRAIMYMAQCLGAICGVGLVKAFMKSYNHL  
GGGANSVSPGYNTGTALGAEIIIGTFVLVYTVFSATDPKRSARDSHVPVLAPLPIGFAVFMVHLATIPITGTGINP  
ARSFGAAVIFNNDKIWDHWFVWGPFGALAAAAYHQYILRAAAIKALGSFRSNPTN

>FraexPIP2;9 FRAEX38873\_v2\_000097580.1

MTKEVQVHHHGKDYVDPPAPLLDMGELKLWSFYRALIAEFIATLLFLYVTVATVIGHKKLNAADQCDGVGLLV  
AWAFGGMIFILVYCTAGISGGHINPAVTFGLFLARKVSLIRAVMYMAQSLGAICGVGLVKAFMKGYNRLGGGA  
NSVSPGYNTGSALGAEIIIGTFVLVYTVFSATDPKRNARDSHVPVLAPLPIGFAVFMVHLATIPITGTGINPARSF  
GAAVIFNNDKVWDDHWIFWVGPFVFGALAAAAYHQYILRAAAIKALGSFRSNPTN

>FraexPIP2;10 FRAEX38873\_v2\_000121310.1

MENRIGMKKEYLDPPPVLIGSTELTMWSFYRAVIAEFIATLLFLYITVLTVIGYKSQTDTTAGHGGNQC  
GGVGI  
LGIAWAFGGMIFVLVYCTAGISEGHINPAVTFGLFLARKVSMIRAVIYMAQCLGAICGVALVKALHKS  
NYKKYG  
GGANQLADGYSAGGLAAEIIIGTFVLVYTVFTATDPKRKARDTHVPVLAPLSIGFAVFMVHLATIPITGTSINPA  
RSLGPAVIYNQKKAWDQWIFWVGPFIGAAMAALYHQCILRAKAFGSYSSSHV

>FraexPIP2;11 FRAEX38873\_v2\_000347560.1

MTKDVESHVEPAGEFSADKYHDPAPPLIDFDELSSWSFYRAIIAEFIATLLFLYITVLTVIGYKSQIDPAHGGD  
QCGGVGILGIAWAFGGMIFILVYCTAGISGGHINPAVTFGLFLGRKVSLIRAVMYMVAQCLGAICGVGFVKAFQK  
SYYNQYGGGANELAPGYNKGVLGAEIIIGTFVLVYTVFSATDPKRSARDSHVPVLAPLPIGFAVFMVHLATIPIT  
GTGINPARSFGAAVIYNKDKPWDDHWIFWVGPFIGAATAAFYHQYILRAAAIKALGSFRSNA

>FraexPIP2;12 FRAEX38873\_v2\_000076880.1

MTKEVSEEGQVHHGGKDYVDPPPTPLLDIGELKLWSFYRALIAEFIATLLFLYVTVATVIGHKKLNNADQCDGVG  
LLGIAWAFGGMIFILVYCTAGISGGHINPAVTFGLFLARKVSLFRALGYMVAQCLGAICGVGLVKAIMKSFYNDL  
GGGANSVALGYNKGALGAEIIIGTFVLVYTVFSATDPKRSARDSHVPVLAPLPIGFAVFMVHLATIPITGTGINP  
ARSFGAAVIFNNDKVWDDHWIFWVGPFVFGALAAAIHQYILRASNLKALGSFRSNPTN

>FraexPIP2;13 FRAEX38873\_v2\_000264070.1

MTKDVESHVEPAGEFSADKYHDPAPPLIDFDELSSWSFYRAIIAEFIATLLFLYITVLTVIGYKSQIDPAHGGD  
QCGGVGILGIAWAFGGMISILVYCTTGIAGGHIKSAVTFRLFLGRKVLLIRAVTYMVAQCLGVICGVGLVKAFHK  
SYYNQYGGKGNELAPGYNKGVMGGAEIIIGTFVLVYTVFSATNPRRSARDSHIPVLSRLPIGFAISMVHLATIPS  
TGTGINLARSVRAAVIYNKDKPWDDHWIFWLGPFIGATIAAFYHQYILRAAAIKALGSLRSNT

>FraexXIP1;1 FRAEX38873\_v2\_000000210.1

MAANNWNIHGVDDEESQTGLSKIQVPVSTPMTQQLTADHDKKKQTSLTLSQMLGLNEIFSLDVWRASVGELIGSA  
VLVFMIDTVISTFETDIKMPNLLLSILIAIVVAILLLAVHPVSGGHINPVISFSAALVGLISMSRAIIYILAQC  
IGAILGALALKAVVSSTIEQTFSLGGCTLTVIAPGPNGPITIGLETAQAFWLEIFCTFVFLFASIWMAYDHRQAK  
RLGHVLVFSIIIGLVLLVYISTSVTAKKGYAGAGMNPACRLGAAIVRGGHLWNGHWVFWAGPAIACVAFYLYTK  
IIPRQHHSKGYEHDFNIMKAMLGFDH

>FraexXIP2;1 FRAEX38873\_v2\_000123280.1

MAGNIGHVNVEYDEESLSDASKIQPVFSTPMPEHWTDEEKMKKKTSLSVSELLGLEDFLSLDVWRASVGELIGTA  
VLVFMMLDTIVISTIESDIKMPNLVLSILAAIIIAILLAVHPVSGGHINPVISFSAALVGLISMSKAIYIYVAQC  
LGAVLGALALKAVVSSTIEQTFSLGGCTLTVIAPGPNGPVMIGLETAQAIWLEIFCTFVFLFASIWMAYDQRQAK  
ELGHVLVLSIVGVVLGLLVFISTTVTAKKGYAGAGMNPACFGPAIVRGGHLWNGHWVFWVGPTIACVAFYLYTK  
IIPLQHHRSKYSYDHDFNIVVKAMF

>FraexXIP3;1 FRAEX38873\_v2\_000228360.1

MAGDNHGVHVECDDEESLGSANKIQPVFSTPMPEHWTDEEKRKKKTSLTRELLGLEDFLSLDVWRASVGELIGTA  
VLVFMMLDTIVISTIEQDIKMPNLVMSILAAIIIAILLAVHPVSGGHINPAISFSAALVGLISMSKALIYIIAQ  
LGAALGALALKAVVSSTIEQTFSLGGCTLTVIAPGPNGPVAIGLETAQAFWLEIFCTFVILFASVWMAYDHRQAK  
ALGHVLVFSIVGVVLGLLVFISTTVTAKRGYAGAGMNPACFGAAVVRGGHLWNGHWIFWVGPAIACVAFYLYTK  
IIPRQHHRKAFYDHDFNIVVKAMF

>FraexSIP1;1 FRAEX38873\_v2\_000049240.1

MGAIIKAAVADGVLTFMWVFCASLTGALTFVVASALGVAQGLPTLLVTTVLVFLLLFVFGIIGDFLGGATFNPTAI  
AAFYAAGIGGADSLFSAALRFPQAAGAVGGALAIMVMPMQYKHMLOGPSLKVDLHTGAIAEGVLTFIITFAVL

LIVLKGPSNPLVKNWLLAMSTVSVVVAGSSYTGPAMNPANAFGWAVVYNKHNTWEQFYVYWICPFAGAILAAWTF  
RFLFPHPTKQPKAKKA

**>FraexSIP1;2 FRAEX38873\_v2\_000305830.1**

GGAESLVTAAVRFPQAAGAVGGALGIMECMPLQYKHMLEGPSLKVDLHTGAIAEGILTFAITFAVLYIVLRGPS  
NLIVKNWLLAMSTVALVVAGSSYTGPSPMNPANAFGWAVVNNHTKTWEQFYVYWICPFIAGAILAAWVFRFLFPPPP  
VKKQKKA

**>FraexSIP1;3 FRAEX38873\_v2\_000020440.1**

MLILGKSSIFFYCPRSLFIRPRDPILHWVLLRRWALTFVVASALGVAQGLPTLFTTTVLVFIILLFLFSIIGDVLG  
GATFNPTAIAAFYAAGIGGPDLSVSAALRFPTQAAGAVGGALAVMEVMP IQYKHM LGGPSLKVDLHTGAIAEGVL  
TFTITFFAVLLIVLRGPSSPLMKNWLLAMPTVSLVVAGSSYTGPSPMNPANVSGASLSLDYATIR

**>FraexSIP2;2 FRAEX38873\_v2\_000151460.2**

MAAVGGRRLLVSDFLMSFMWVWSSVLKIFVFKILGYGSHDLRGEILRYGISIVNMFFFAFLAKSTKGGAYNPLT  
VLSSAISGDFSNFLFTVGARIPVQVLGSIYGVRLILAAFEIGRGPRLNVGIARGALTEGFLTFGIVIIISQGLSR  
KIPGSFFMKTWISSISKLT LHM LGS DLTGGCMNPASVMGWAFARREHLSKEHLIVYWLAPIEATLAAVWAFRVTV  
LPEKDAKPKVKSGKSE

**>FraexSIP2;1 FRAEX38873\_v2\_000056860.1**

MAAVGRRRLLVSDFFMSFMWVWSSVLKIFVHKILGYGAHDLKGEILRYGIYIVNMFFFAFLAKATKGGAYNPLT  
ILSSAISGDFSNFLFIVGARIP IQVLGSIYGVRLILAAFEIGRGPRLNVDISRGALTEGILTFGIVIIISQGLSR  
KIPGSFFMKTWISSVSKLT LHI LGS DLTGGCMNPASVMGWAFARGEHISKEHLIVYWLAPMEATLAAVWAFRIV  
RPKKDETPKVKSGKSD

**>FraexNIP1;1 FRAEX38873\_v2\_000146020.2**

MAEISSGVNGNHGMSVNIKLEEDSNHQTLTESANSSHGNSSGCSLLTLPFIQKIIAEILGTYFLIFAGCAAVVVN  
ADKDKVVTHPGISIVWGLVVMVMVYSVGHISGAHFNPAVTIAFATCKRFPWKQVPAYILAQVIGSTLASGTLRLL  
FTGKHDHFP GTLPAGSDMQSLVVEFIITFYLMFVISGVATDNRAIGELAGLAVGSTVLLNVMFAGPISGASMNPA  
RSLGPAIVSKQYKGLWIYMVGPITGAVAGAVVYNIIRFTDKPLREITKSGSFLKTSSRNVSNR

**>FraexNIP1;2 FRAEX38873\_v2\_000067570.2**

MAEMSGANGVALNVKDDLNEKHIONSPDWLPFIQKVIAEILGTYFLIFAGCASVVVNADKDKVITMPGIAIVWGL  
VVMVMVYSVGHISGAHFNPAVTIAFASCKRFP L RQVPAYISAQMIGATLASGTLRLLFNGKHDHFGGTLP TGSNM  
QSFVVEFIITFYLMFVISGVATDNRAIGELAGLAVGATILLNVMFAGPISGASMNPARSLGPAIVSNKYKGIWIY  
ILAPTLGAVAGAVVYKYHQIHKQAFKRNHQECFFPQELGPWEAQLIIKLIWF

**>FraexNIP1;3 FRAEX38873\_v2\_000371660.1**

MAEMSGANGLADEKRIQNSPAWL PFIQKVIAEILGTYFLIFAGCAAVVVVNADKDKVITMPGIAIVWGLVVMAMVY  
SVGHISGAHFNPAVTIAFATCKRFP L RQVPAYIAAQVIGATLASGTLRLLFMGKHDHFGAGTLPTGSDLQSFVVEF  
IITFYLMFVISGVATDNRAIGELAGVAIGATILLNVMFAGPISGASMN PVRSLGPAIVSNRYEGIWIYIVGPTLG  
AVAGAWAYNIIRFTNKPLREITKTASFLKI

**>FraexNIP1;4 FRAEX38873\_v2\_000067580.1corrected**

MAEMSGANGVALNVKDDLNEKHIONSPDWLPFIQKVIAEILGTYFLIFAGCASVVVNADKDKVITMPGIAIVWGL  
VVMVMVYSVGHISGAHFNPAVTIAFASCKRFP L RQVPAYISAQMIGATLASGTLRLLFNGKHDHFGGTLP TGSNM  
QSFVVEFIITFYLMFVISGVATDNRAIGELAGLAVGATILLNVMFAGPISGASMNPARSLGPAIVSNKYKGIWIY  
ILAPTLGAVAGAVVYNIIRFTNKPLREITKSASFLKSSARNHN

**>FraexNIP1;5 FRAEX38873\_v2\_000326700.1**

MTSRVRWSSPRVPRLODEEDNDWIENGYEDTDGSLASADDNDEIDCRKRGPNHGSNVCADETGRIPTNHDSNTSP  
ISSVSTDGDSNRNCFNAFFMQKLLAELIGTYFLVFAGCTAVVVNMMDMNRVVTLPGIALVFGVLVLMVLVYSVGHVS  
GAHFNPAVTIALASCGKFP LMQVPGYISVQILGSILASATIRLLFEGNQDKFAGTLPTGSDLQAFLEIITTFLE  
LFVISSLTTDDRAVTKFILEECTIIVMVAGPISGGSVNPARSLGPAIVSSRYERLWIYLLGPILGAIGGAWVYNL  
IRLQAKFSIENVTNHS LF

**>FraexNIP2;1 FRAEX38873\_v2\_000215090.1**

MDNRQQNFCDLNNTPLAPVDNFKSQISLSCVGRRLKENYPSAFLNKVTA EIIATYLLVFVTCGSAALSASDEHE  
VSKLGASVAGGLIVTVM IYAVGHISGAHMNPAVTLAFAAVSRFPWKQVPFYAVAQLIGATSAGFTLRVLLHPIKH  
VGTTSPSGTDI QALIMEIVVTF SMVFIASAVATDTKAIGELGGVAVGSAVCISSILGGPISGGSMNPARSIGPAI  
ASAYYKGIWVYIIGPVCGALLGAMSYNFIRSDKPAHAISTQSVSFKLCRLKSNNEQIADNDTLNQL

**>FraexNIP3;1 FRAEX38873\_v2\_000201220.1**

MANSPSIIISFSPKQNLPTDLSITEEAKGYSAQEFPPRDSISPSYYQOIIAEILGTYVLVFAGCGAALVDREKTLT  
VVG LAMVWGLALMAMIYALGHVSGGHFNPAVTIGFAAAQKLPLIHVPLYVLSQFLGSTLACLTLKVLFNDAQADIL  
PTLTRYSSSTTDLEAI IWEFIITFVLM L TIRGVASDDDRANNELAGVAIGATVLFNALVAGPITGASMNPARSIGP  
AIVSGYKNQWVVFV VAPILGAIAASLIYSLLPWKPGKHESARSTYNDLYLCPEA

**>FraexNIP4;1 FRAEX38873\_v2\_000205820.1**

MAIKEMEISKMEEGVDTSTFQ SNAKEGLCTSASIVTLVQKVIAEVIGTYFIIIFSGCGVVVNKLYGGTVTFPGIC  
ATWGLIVMVMVYSVGHISGAHFNPAVTITFAIFRRFPWKVEPLY IMAQLIGSILASCTLAIMFDVTSEAYFGTLP  
VGSNGQSLTIEIIISFLLMFNISGVATDSRAIGDLAGLAVGMTIMLN V FVAGPISGASMNPARSIGPAIVKHTYK  
GLWVYIFGPLIGTIFGGFAYNLIRFTNKPLRELTKSSSVIRTISKHNTT

**>FraexNIP5;1 FRAEX38873\_v2\_000251140.1**

MAEFEPGTPGTPTTPTPLMPSLRVDSLSYDRKSMPCRCKCLPLNVSTWAAPHTCLTHFSAPEISLTRKVAAEFVGT  
FILIFGATAGPIVNQKYDGAELVGNAACAGLAVMIAILSTGHISGAHLNPSLTIAFAAFRHFPIHVPIYIAAQ  
VSASICACFALKGVFHPFLSGGVTTIPSVSSGQAFGLEFLITFTLLFVVTVATDTRAVGELAGLAVGATVMLNLI  
VAGPSSGGSMNPVRTLGPAVAAGNYKSIWIYLVAPTILGALAGAAIYALVKLQGVEDDEPRHQOG

>FraexNIP5;2 FRAEX38873\_v2\_000203670.1

MASLKSRLLEHLVTAIALRLYLAEFISTFFFVFAAVGTTMSSRKMMMLDAASNSSSLVAIVVANAFALSVAVYISAN  
IFGGHVNPVDTFGMAMGSHISIPMAIFYSISQMFGSVMACLLLKATTAVQHVPHTVIEHEMTGFEGAVLKGVMTF  
ALVYMVYVASNLRPVSAGAIGPLAIGLVAGANVLASGPFTGRSMNPAYSFSGSAIVGGSFKNQEVYVWGPLICAAI  
ARILHDNVVFPVAVPDSFRGNADGVGV

>FraexNIP6;1 FRAEX38873\_v2\_000011710.1

MGTEDVASVPKTPAIPGTPGCTPLFGGQFKQERGGDGRKSLFKNCKCFSVETLSLEEGTLPSVSCALIPPPFSLA  
RKVGAEFIGTFILIFTGTATAIVNQKTQGETLLSLAASTGLAVMIVIQTSTHISGAHVNPSTIAFAALKHFPW  
KHVPVYIGAQILASTCAAFLLKAIFHPIMGGGVTVPSGGFAQAFLEFIISFNLMFVVTVATDTRAVGELAGMG  
VGATVMLNILIAGETTGASMNVPRTLGPAAIANNYKAVWIYLTAPILGALAGAAAYSARKLPDRDVNGQKKLPNA  
EHSFSR

>FraexNIP6;2 FRAEX38873\_v2\_000070290.2

MDTEDVASAPSTPVTPTGTPGAPLFGGFKRDRNSFNRRNSSLLKSCCKCFSVGTWELEEGSLPPVSCALAPPSVSLA  
RKVGAEFIGITLILIFTGTATAIVNQKTNGSETLIGLAASSGLAVMVIILSTGHISGAHLNPAITISFAVLKHFPW  
KHVPSYIGAQVMASLTASFLLKGIFNSIMGGGVTVPSVRYAQAFLEFIITFNLMFVLTAVATDTRAVGELAGIA  
VGATVMLNILIAG

>FraexNIP7;1 FRAEX38873\_v2\_000066660.1

MQQSIKAPFRELS SSPDISDSTATSSQPKNDLENGASTLNKTLFNSLHKIDKSLLRKVLAEALGTFMLMFCICAI  
IAIMHLIGVEVGLMEYAATAALSVTVIVFSIGAISGAHVNPVAVTIAFATVGPFPWSEVPLYILAQIGGSALATYI  
ARLVYGIRSELVMTKPLQGCTAAFWVELIATFIILFLTASLNDPQSIGQVSGFVVGVAIGLGLVISGPVSGGSM  
NPARSLGPLVSWKFDHDLWIYLVAPTIGAIAGVFAYRILRLQGWPCSSQAQKGSDSLH

>FraexTIP1;1 FRAEX38873\_v2\_000139770.2

MPISRVAIGSPVEASQPDAAKAAVAEFISMLIFVFAGEGSGMAFAKLTDNGSTTPAGLIAASIAHAFALFVAVSV  
GANISGGHVNPVAVTFGAFVGGHITLFRSILYWIAQLLGSVACLLLKLFATGGLETSAFALSSGVTVWNAVVFV  
MTFGLVYTVYATAVDPKKGNLGIAPIAIGFIVGANILAGGAFDGAASMPAVSFGPAVVSWTWDSHWVYWLGPV  
GAGIAALVYEILFINQSHEQLPTSLEY

>FraexTIP1;2 FRAEX38873\_v2\_000060210.1

MPLSRISVGSAPAEARHPDTLKAALAEFISMLIFVFAGEGSGMAFAKLTDGGSSTPAGLIAAAIAHAFALFVAVSV  
AANISGGHVNPVAVTFGAFVGSWIIIVEIHVFLDSPIAWICCCMLAPKVLHWWAGNVCICTFIRVDPKRGDIGTIA  
PIAIGFIVGANILAGGAFDGAASMPAVSFGPAVVSWTWDSHWVYWLGPVVGAGIAALVYEIVFINQNTHEQLPTN  
EY

>FraexTIP1;3 FRAEX38873\_v2\_000314120.1

MSSEYFNVFPFRHVAIGNQNEFRQPGAIIKAAALAEFISTLIFVFAGEGSGMAYNKLTDGNAPSSPSGLVSAVAHA  
FGLFVAVSISANISGGHVNPVAVTFGLFLGGNISLIRGILYIIAQLLGSVACLLLLFTSTGGLETSAFALGADV  
SVWN  
AFVFEIVMTFGLVYTVYATAVDPKKGELGIIAPIAIGFIVGANILAGGAFTGASMPAVSFGPALVSFTWTHHW  
YVAGPLIGGGLAGIVYEVFFISHSHEPLPGSEY

>FraexTIP1;4 FRAEX38873\_v2\_000086560.1

MSSEFFNVPLRRVAFGHRDEFQPGAIIKAAALAEFISTLIFVFAGQSGMAYNKLTDGNAPSSPSGLVAAVAHGF  
GLFVAVSTANISGGHVNPVAVTFGLFLGGNISLFRGVLYIIAQLLGSVACLLLLFTTGGLETSAFALSAGV  
SVWN  
AFVFEIVMTFGLVYTVYATAVDPKKGEVGIIAPLAIGLIVGANILAGGAFTGASMPAVSFGPALVSFNWTHHW  
YVAGPVIGGGLAGIVYEVFFISHSHEPLPSSEY

>FraexTIP1;6 FRAEX38873\_v2\_000091910.1

MPIYQIAIGTPGEASHPDALKAAALAEFFSMLIFVFAGQSGMAFNKLSNDGSSTPSGLLAAALAHAFALFVAVSV  
SANISGGHVNPVAVTFGAFIGGNITLLRGILYWLAQLLGSVACMLLKLFATGGLEISAFALSSGVSVWNAV  
FVFEIV  
MTFGLVYTVYATAVDPKKGLDLSIAPIAIGFIVGANILAGGAFDGAASMPAVSFGPALVSWNFTHHWYVWG  
PLIG  
GATIAALVYDNIYINGEITHEQLPVTDY

>FraexTIP2;1 FRAEX38873\_v2\_000292820.1

MPAIAFGRFHDSSFSIGSLKAYVAEFISTLLFVFAGVGSAAIYNKLTADAALDPAGLVAVAICHGFALFVAVS  
SIGA  
NISGGHVNPVAVTFGLALGGQITLLTGLFYWIAQLLGSIVACYLLVFTGGLAIPTHGVGAGVGAIEGVMEIV  
T  
FALVYTVYATAADPKKGLGTIAPIAIGFIVGANILAAGPFGSGSMNPARSFGPAVASGNFSGIWIYVWG  
PLIG  
GLAGLIYANVFMVSHETPLATDF

>FraexTIP2;2 FRAEX38873\_v2\_000028480.1

MQAIAFGRFDDSCRLGSLKAYLAEFISTLLFVFAGVGSAAIYNKLTSDAALDPAGLVAVAVCHGFALFVAVSV  
GVA  
NISGGHVNPVAVTFGLAVGGQITVLTGLFYWIAQLLGSIVACFLKVVTTGGLAIPTHGVAAGVGAIEGVMEIV  
T  
FALVYTVYATAADPKKGLGTIAPIAIGFIVGANILAAGPFGSGSMNPARSFGPAVASGDFAGNWIYVWG  
PLIG  
GLAGLVYANVFMVHEYTPLVDEF

>FraexTIP2;3 FRAEX38873\_v2\_000217250.1

MPTIAFGRINDSISVGSCLKAYLAEFISTLLFVFAGVGSIAIYNKLTSDAALDPAGLVAVAVCHGFALFVAVSVGA  
NISGGHVNPVAVTFGLAVGGQITILTGLFYWIAQLLGSIVACLLLKFTVTGGLAIPIHGVAAGVGAIEGVVMEIVIT  
FALVYTVYATAVDPKKGSLGTIAPIAIGFIVGANILAAGPFSGGSMNPARSFPGPAVASGDFAGNWIYVWGPLIGG  
GLAGLVYANVFMVHEHTPLVSEF  
**>FraexTIP2;4 FRAEX38873\_v2\_000269930.1**  
MVRINLGSIGDSFSVPSLKYIAEFIAITLLFVFAGVGSIAIYNKLTSDAALDPGLVAVAVAHAFALFVGVSMMA  
KASGGHLNPAVTFGLAIGGNITITGLFYWIAQLLGSIVACLLLKFTVTNGLAIPHTGVASGMNAVEGVVMEIIT  
FALVYTVYATAADPKNGPLGTIAPIAIGFIVGANILAAGPFSGGSMNPARSFPGPAVVAVDFSQNWYIYVWGPLIGG  
GLAGLVYGDVFIGSYAPLPVQEEYP  
**>FraexTIP3;1 FRAEX38873\_v2\_000352370.1**  
EEATHPDSARATLAEFLSTLVFVFAGEGSLALDKMYKDTALGASSLVVIALAHALSIFAAVASSMNVSGGHVNP  
AVTFGALVGGRVSVLRAIYYWIAQLLGSVLAAILLRLATDGLRPRGFSVADGVGEWNALLMEIVLTFGLVYTVYA  
TAIDPKRGSGLGTIAPLAIAFIVGANVLVGGPFSGASMNPARAFGPALVGWRWRNHVYWLGPFFVGAALAGVIYEF  
GMIQAETPHHSHHLHQPLTPEDY  
**>FraexTIP3;2 FRAEX38873\_v2\_000383670.1**  
MPRGYTFGRAEEATHPDSARATLAEFLSTFVFVFAGEGSILALDKMYRETALGASSLLVIALAHALALFAAVASS  
MNVSGGHVNPVAVTFGALVGGRVSVLRAVFWIAQILGAIVASLLWLATDGLKPQGYSAAGVGEWNALVMEIVL  
TFGLVYTVYSTAIDPKRGSGLGTIAPLAIAFIVGANVLVGGPFSGASMNPARAFGPALVGGWRWRDHVYWLGPPLG  
AALAGVIYEFGMIIQTETPHHTHHQPLAPEDY  
**>FraexTIP4;1 FRAEX38873\_v2\_000264810.1**  
MAKIALGNTREAFQSDCIQALIVEFICTFLFVFAGVGAAMATDKLNGDPLVGLFFVAMAHALVVAVMISAGFRIS  
GGHLNPAVTLGLLAGGHITVVRISILYIDQLLASTAACALLKYLTGGLTVPVHTLATGVDFIQGVIMEIVLTFSL  
LFTVYTTIVDPKKGFLEGMGPLLTLGLVVGANVMAGGPFSGASMNPARSFPGPALVSGDWDHVVYVWGPLIGGGLA  
GYIYENFFIVRSHVPLSREVVF  
**>FraexTIP5;1 FRAEX38873\_v2\_000139560.1**  
MASLKSRLHTVTPTALRSYLAEFISTFFFVFASVGATMSTLKMMPDAASDSSSLVAIAVANAFALSVAVYIAAN  
ISGGHVNPVAVTFGMAIGGHISIPMAIFYWISQTLGSVMACVLLRVTTVVGQRPVTHSIPQEMTGFGAAILEGVMTF  
TLVYTVYAAADPRRGSISVIGPLAIGLVSGANVLASGPFTGGSMNPSYSFSGSALVRGSFKNQAVYVWIGPLIGAAI  
AGILYEHVVFPAQPEPDSLRLGIARGVEV  
**>FraexTIP5;2 FRAEX38873\_v2\_000166170.2**  
MPEFEVGTGPMSAPATPGTPTPLMSSLRIDSLSYDRKSMRCKCLPVDAPTGWGAPHTCSLTNFSVPDISLTRKLG  
AEFVGTFILIFGATAGPIVNQKYNQAETLIGNAACAGLAVMIVILSTGHISGAHLNPSLTIAFATLRHFPWAHVP  
AYIAAQVSASICASFALKGVFHPFMSGGVTVPVSTGQAFALFLITFNLLFVVTAATDTRAVSYQLNTNIIFF  
FLFFKYKVINPCLQVGELAGIAGVATVMLNILVAGPSSGGSMNPVRTLGPAVAAGNYKAVVYLVAPTLGALAG  
AGIYTLVKLNGEEEEAPRQVRSFRR

# Pseudogene/incomplete *OleuraQP* sequences

**>FraexPIP2-related FRAEX38873\_v2\_000337260.1**  
MVHLATIPITGTSINPARSLGPAVIYNQKKAQDDQWIFWVGPFIGAAMAFYHQILRAKAFGSYSSSHV\*  
**>FraexPIP2-related FRAEX38873\_v2\_000295860.1**  
VLAPLPIGFAVFMVHLATIPITGTGINPARSLGAIVIYNQEKAWDDQWIFWVGPFIGAIIAFYHQFILRAGAVK  
ALGSFRSSSHV\*  
**>FraexPIP2-related FRAEX38873\_v2\_000121300.1**  
MAKGVGVVEHGSFTAKDYHDPAPPLIDAEELTKWSFYRAVIAEFIAITLLFLYITVLTIVIGYKSQIDTTAGHGDD  
QCGVGILGIAWAFGGMIFVLVYCTAGISGEFCLYAHINAYKYGLITIRK\*  
**>FraexNIP5-related FRAEX38873\_v2\_000192600.1**  
MAEFEPGTPTPTPTPLMPSLRVDSLSYDRKSMRCKCLPLNVSTWAAPHTCLTHLSAPEISLTRK
